# Supplementary material for: Estimating progress towards meeting women’s contraceptive needs in 185 countries: A Bayesian hierarchical modelling study
Source: PubMed Central journal article supplement (PMC7028249; doi:10.1371/journal.pmed.1003026), 2020-02-18

Estimating Progress Towards  
Meeting Women's Contraceptive Needs in 185 Countries:  
A Bayesian Hierarchical Modelling Study

**S2 APPENDIX**  
(Supplementary Figures)

Vladimíra Kantorová\*      Mark C. Wheldon      Philipp Ueffing      Aisha N. Z. Dasgupta

*United Nations Population Division, New York, NY*<sup>†</sup>

23rd January 2020

---

\*Corresponding author. Vladimíra Kantorová, Population Division, Department of Economic and Social Affairs, United Nations, [kantorova@un.org](mailto:kantorova@un.org)

<sup>†</sup>The views and opinions expressed in this paper are those of the authors and do not necessarily represent those of the United Nations. This paper has not been formally edited and cleared by the United Nations.

**CONTENTS**

|                                   |            |
|-----------------------------------|------------|
| <b>1 Unmarried women</b>          | <b>2</b>   |
| 1.1 Countries and areas . . . . . | 2          |
| 1.2 Country aggregates . . . . .  | 188        |
| <b>2 Married women</b>            | <b>221</b> |
| 2.1 Countries and areas . . . . . | 221        |
| 2.2 Country aggregates . . . . .  | 407        |
| <b>3 All women</b>                | <b>440</b> |
| 3.1 Countries and areas . . . . . | 440        |
| 3.2 Country aggregates . . . . .  | 626        |

These figures contain a systematic and comprehensive set of annual, model-based estimates and projections, and underlying survey-based observations, for a collection of family planning indicators, including contraceptive prevalence, the unmet need for family planning, and the demand for family planning satisfied by use of contraception (any method or modern methods alone).

The results pertain to unmarried and not in a union women of reproductive age (UWRA), married or in a union women of reproductive age (MWRA) and women of reproductive age irrespective of marital status (WRA) and cover the period from 1970 to 2030. Estimates based on medians, as well as 80 per cent uncertainty intervals (represented by lines) and 95 per cent uncertainty intervals (represented by shaded areas), are provided for 185 countries or areas. The results are based on data available as of February 2019.

*Note:* The designations employed and the material presented in this publication do not imply the expression of any opinion whatsoever on the part of the Secretariat of the United Nations concerning the legal status of any country, territory or area or of its authorities, or concerning the delimitation of its frontiers or boundaries. The term “country” as used in this publication also refers, as appropriate, to territories or areas. Countries or areas listed individually are only those with 90,000 inhabitants or more in 2017; the rest are included in the aggregates but are not listed separately.

## 1 Unmarried and not in a union women of reproductive age

### 1.1 Countries and areas

Afghanistan (Southern Asia, SA Group 0) --- Unmarried / Not In-Union

CP (any)

CP (modern)

CP (traditional)

Unmet need among all unmarried women

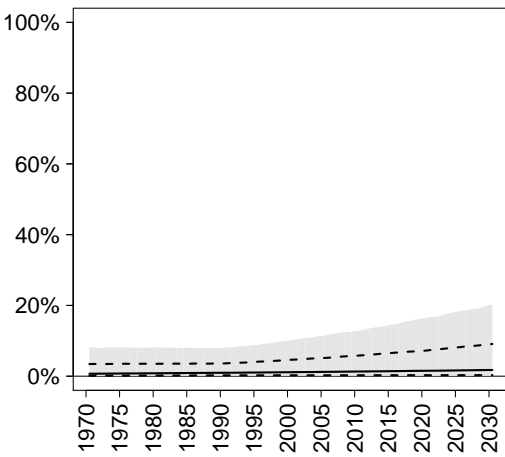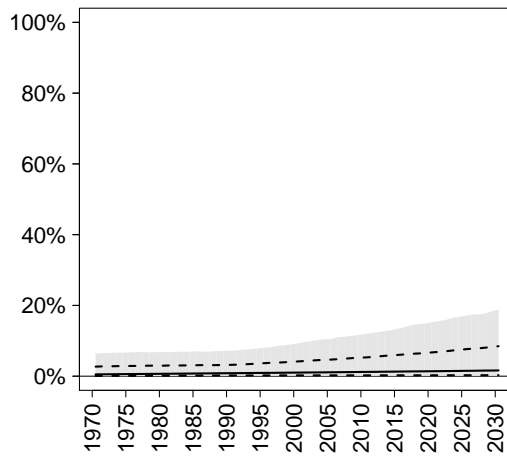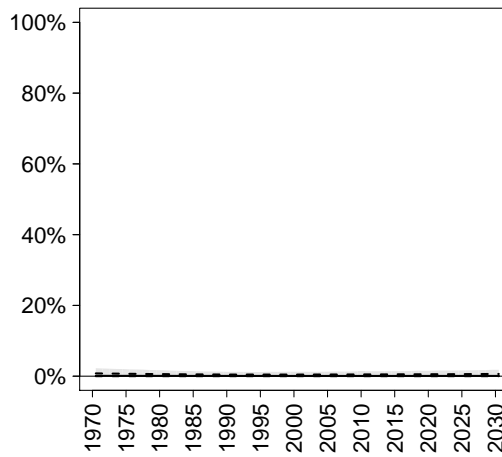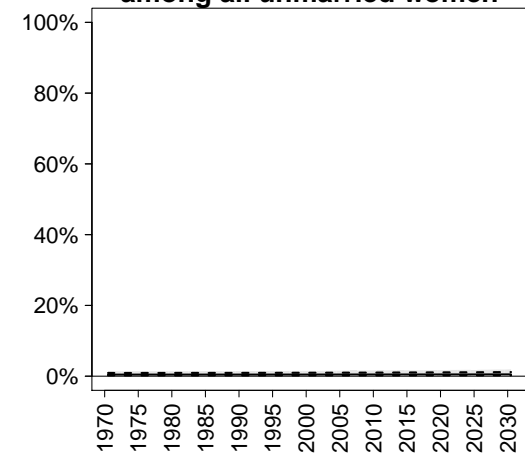

Total demand

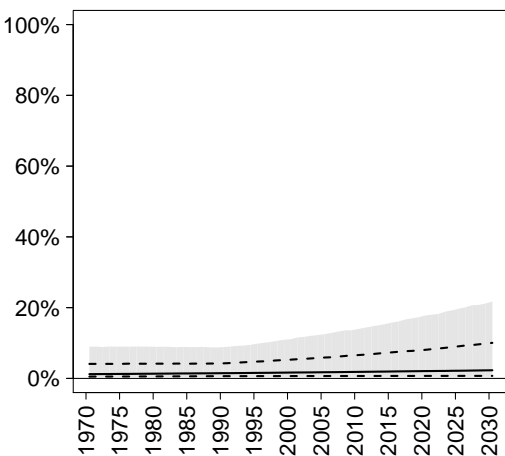

- DHS
- MICS
- Other international survey
- National survey
- PMA
- Subpopulation
- +: Higher contraceptive use
- : Lower contraceptive use
- A: Other age group
- F: Folk methods included
- S-: Sterilization included
- S+: Sterilization excluded
- Unmarried women
- ▽ Formerly married
- ◻ Partnered women
- ◇ CP (any) ≤ 1%

Albania (Southern Europe, SA Group 1) --- Unmarried / Not In-Union

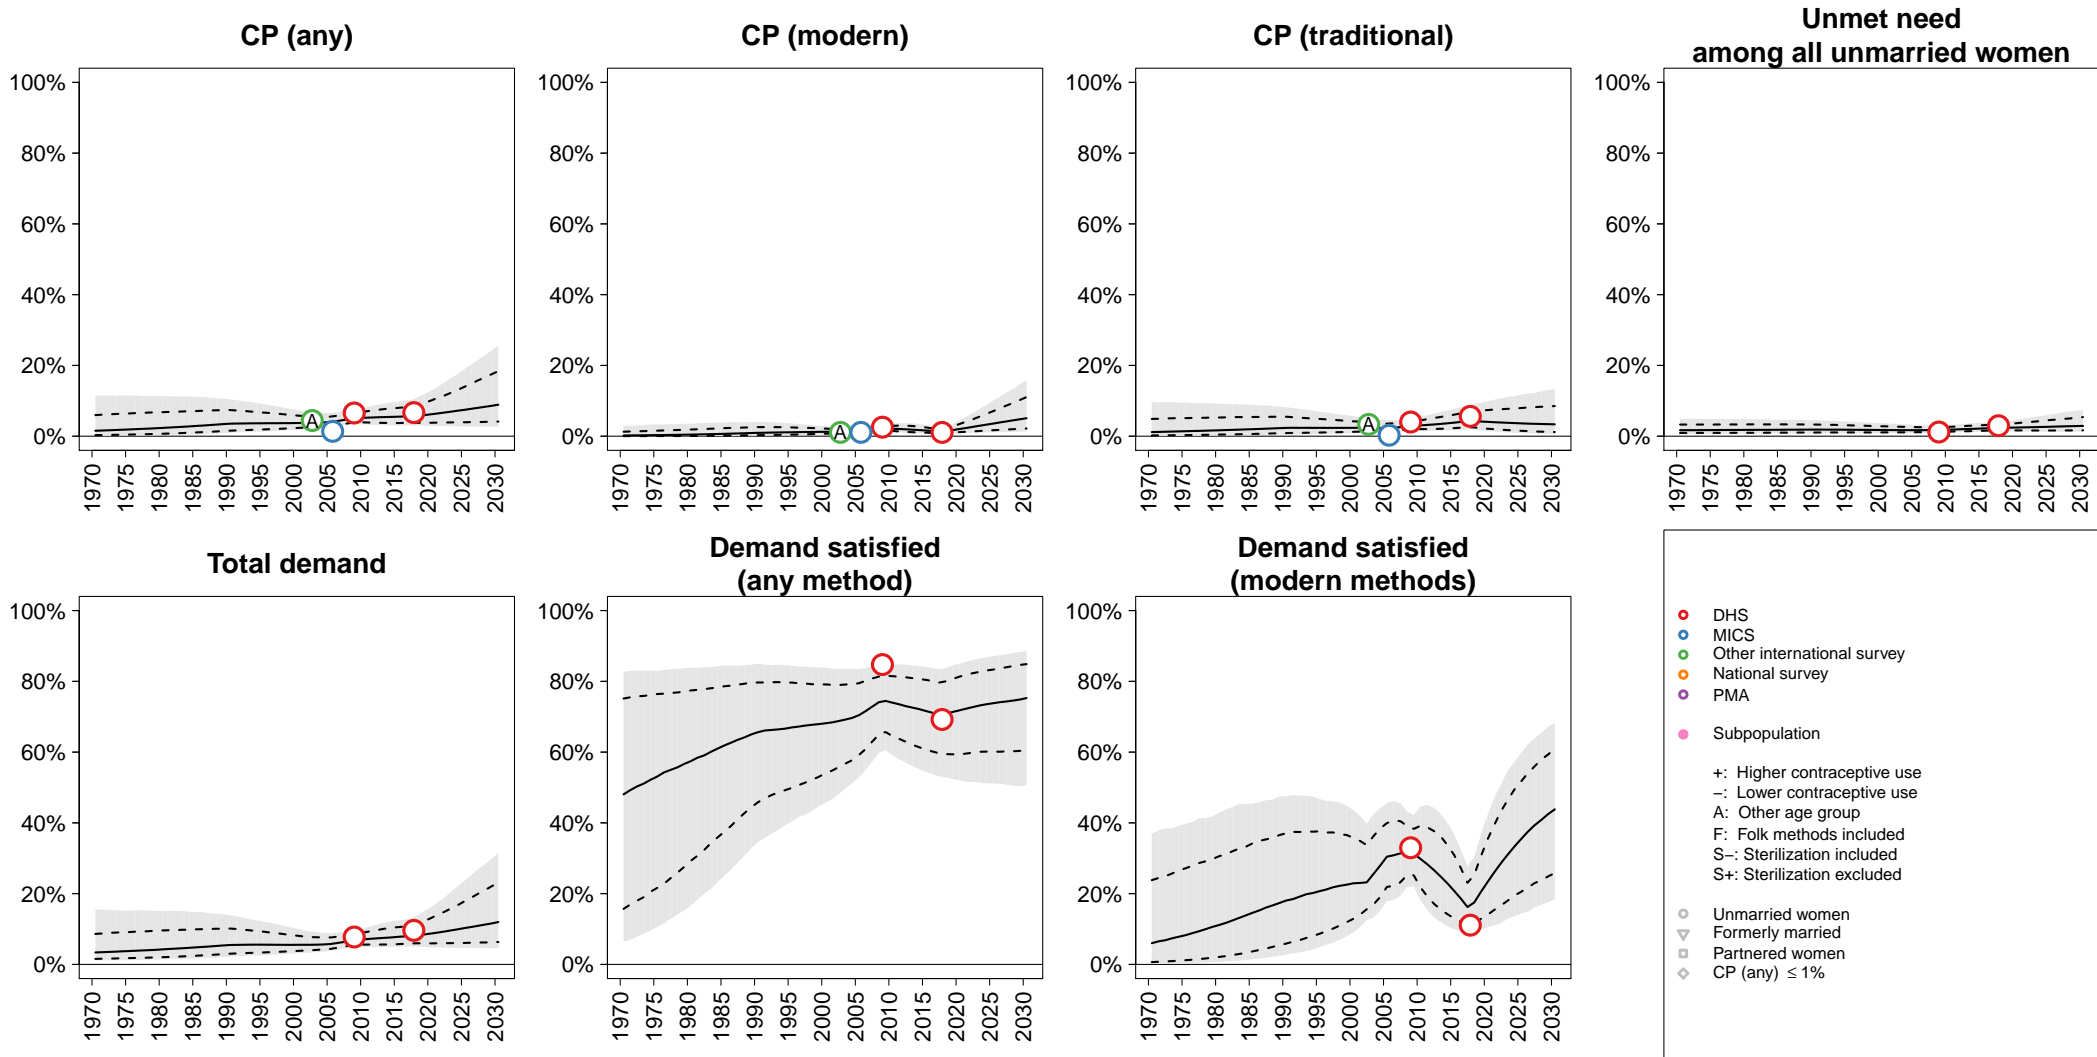

Algeria (Northern Africa, SA Group 0) --- Unmarried / Not In-Union

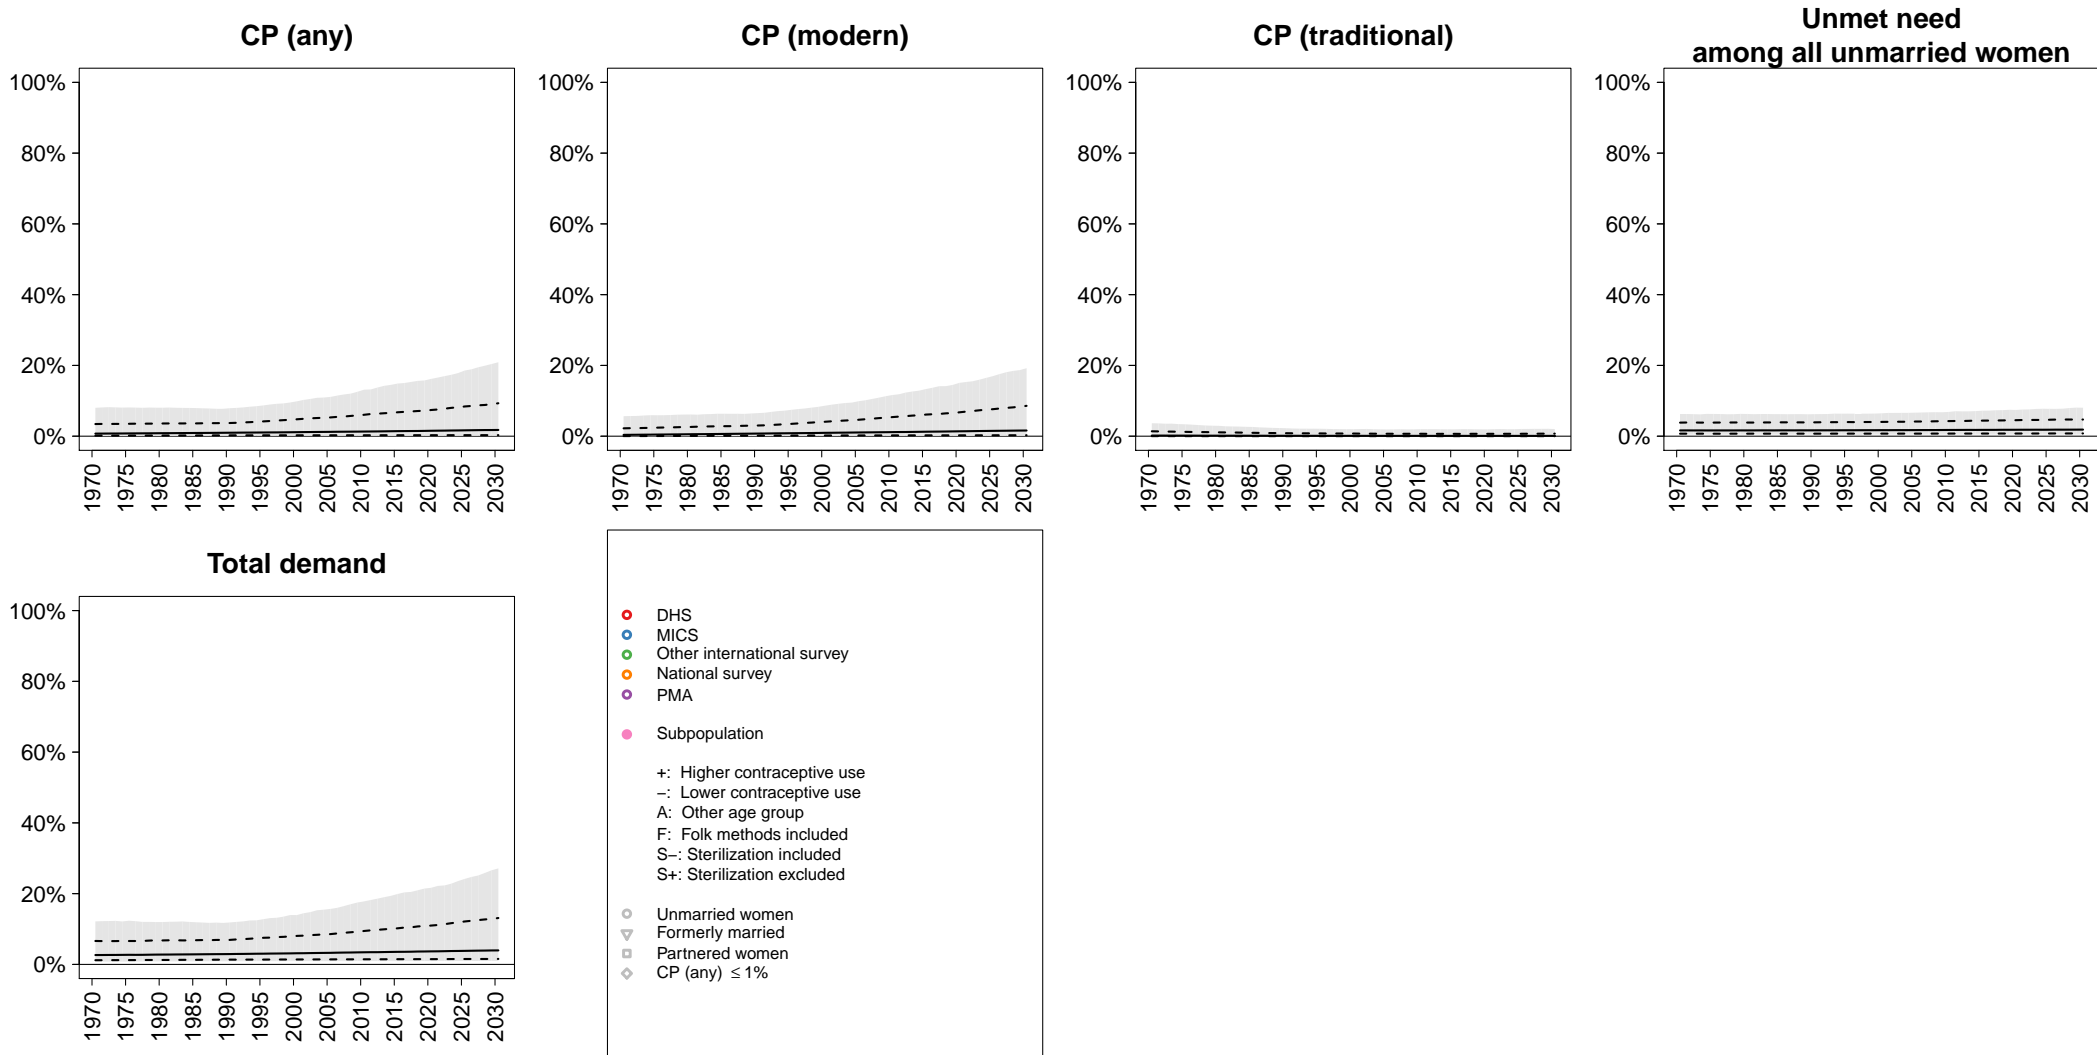

Angola (Middle Africa, SA Group 1) --- Unmarried / Not In-Union

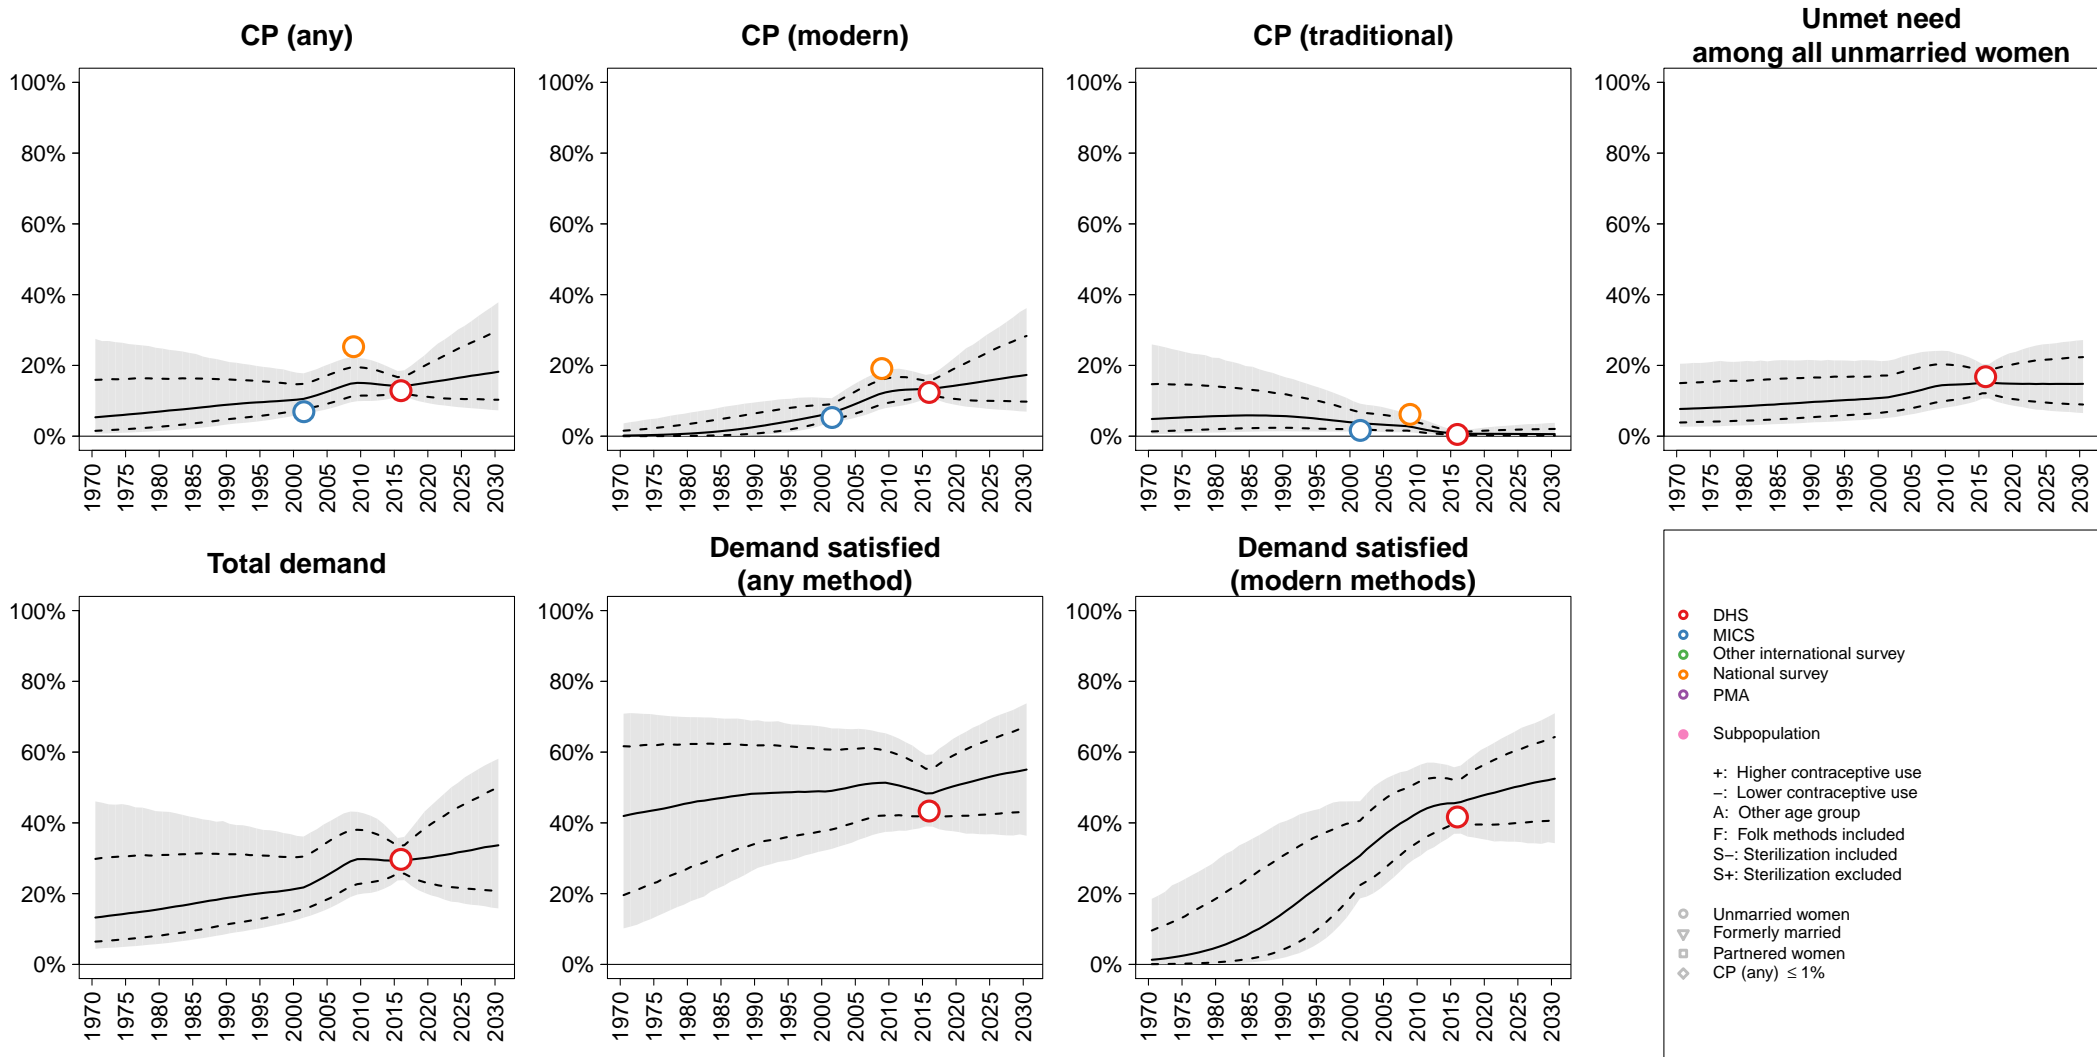



Antigua and Barbuda (Caribbean, SA Group 1) --- Unmarried / Not In-Union

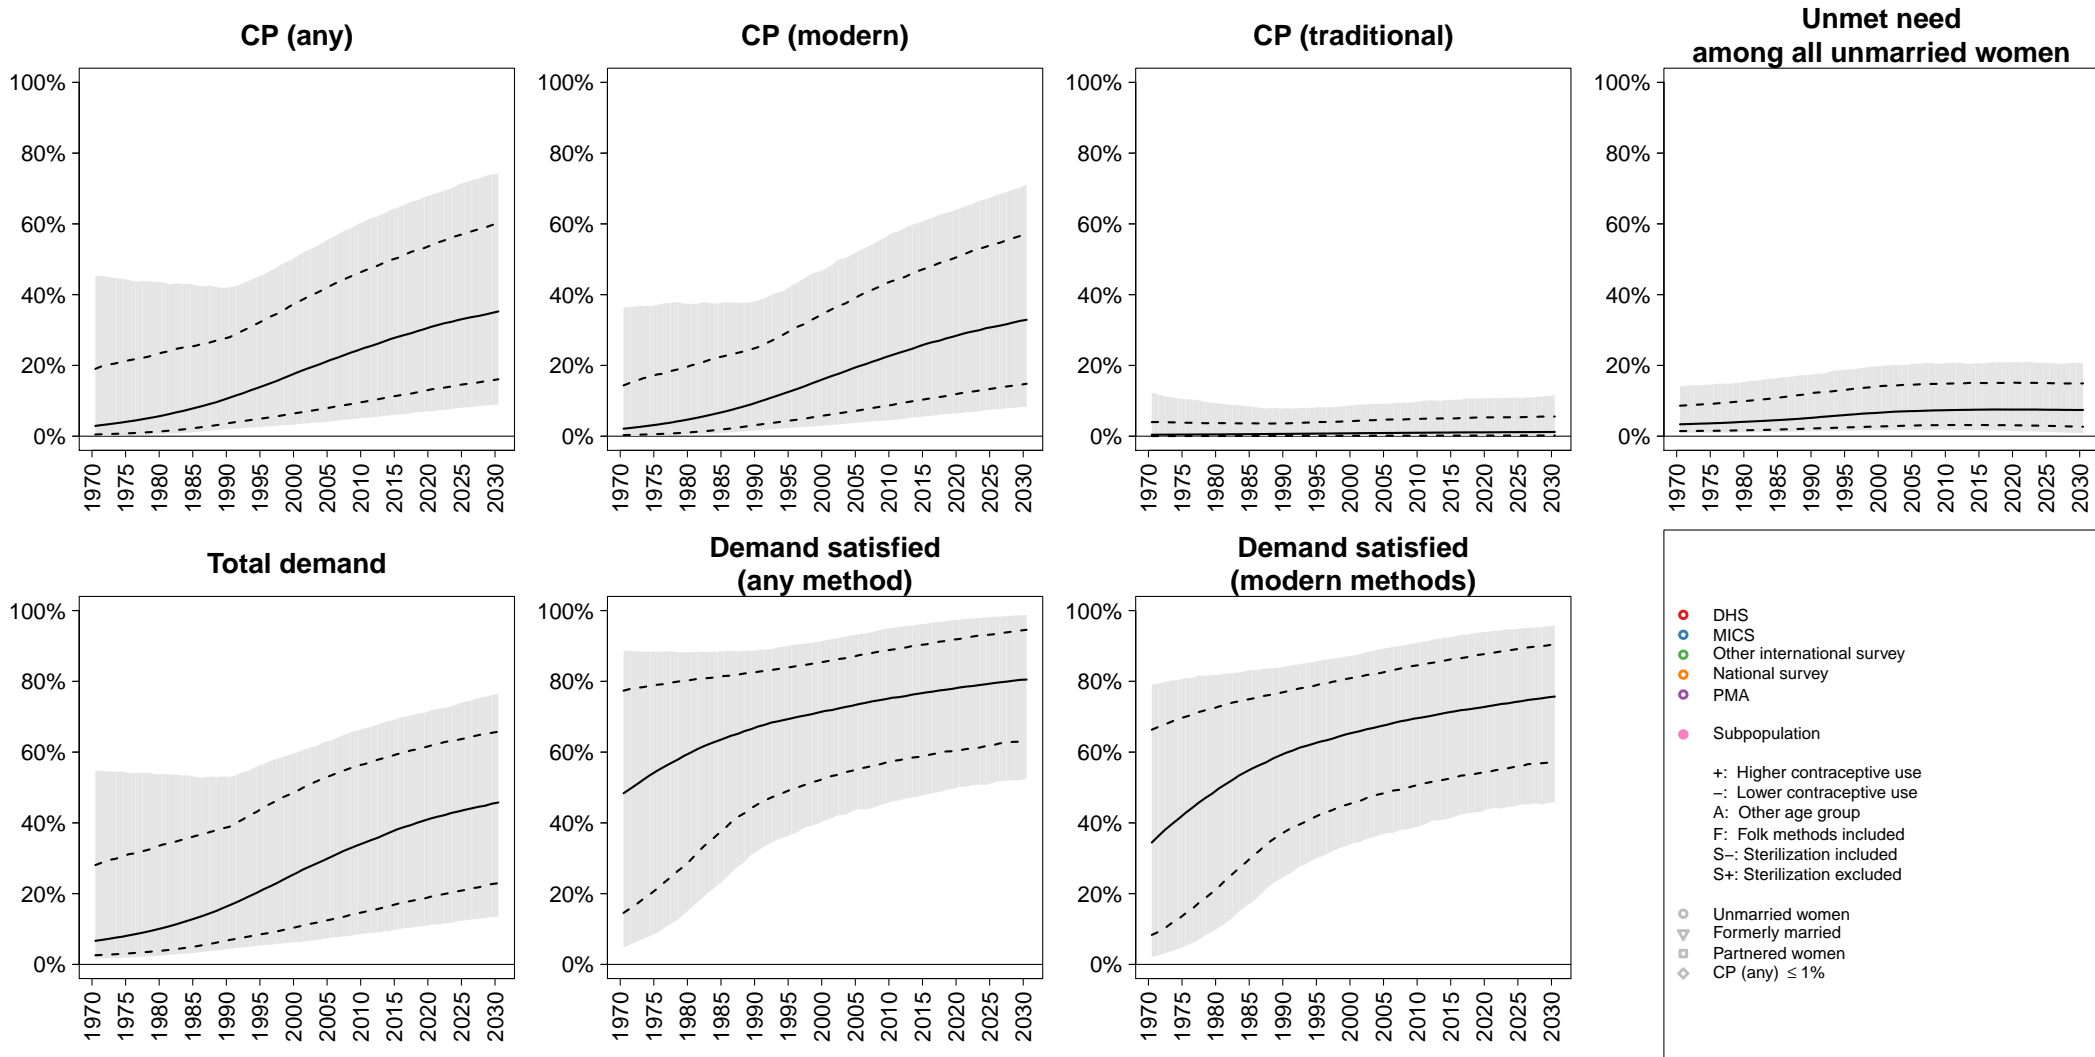

Argentina (South America, SA Group 1) --- Unmarried / Not In-Union

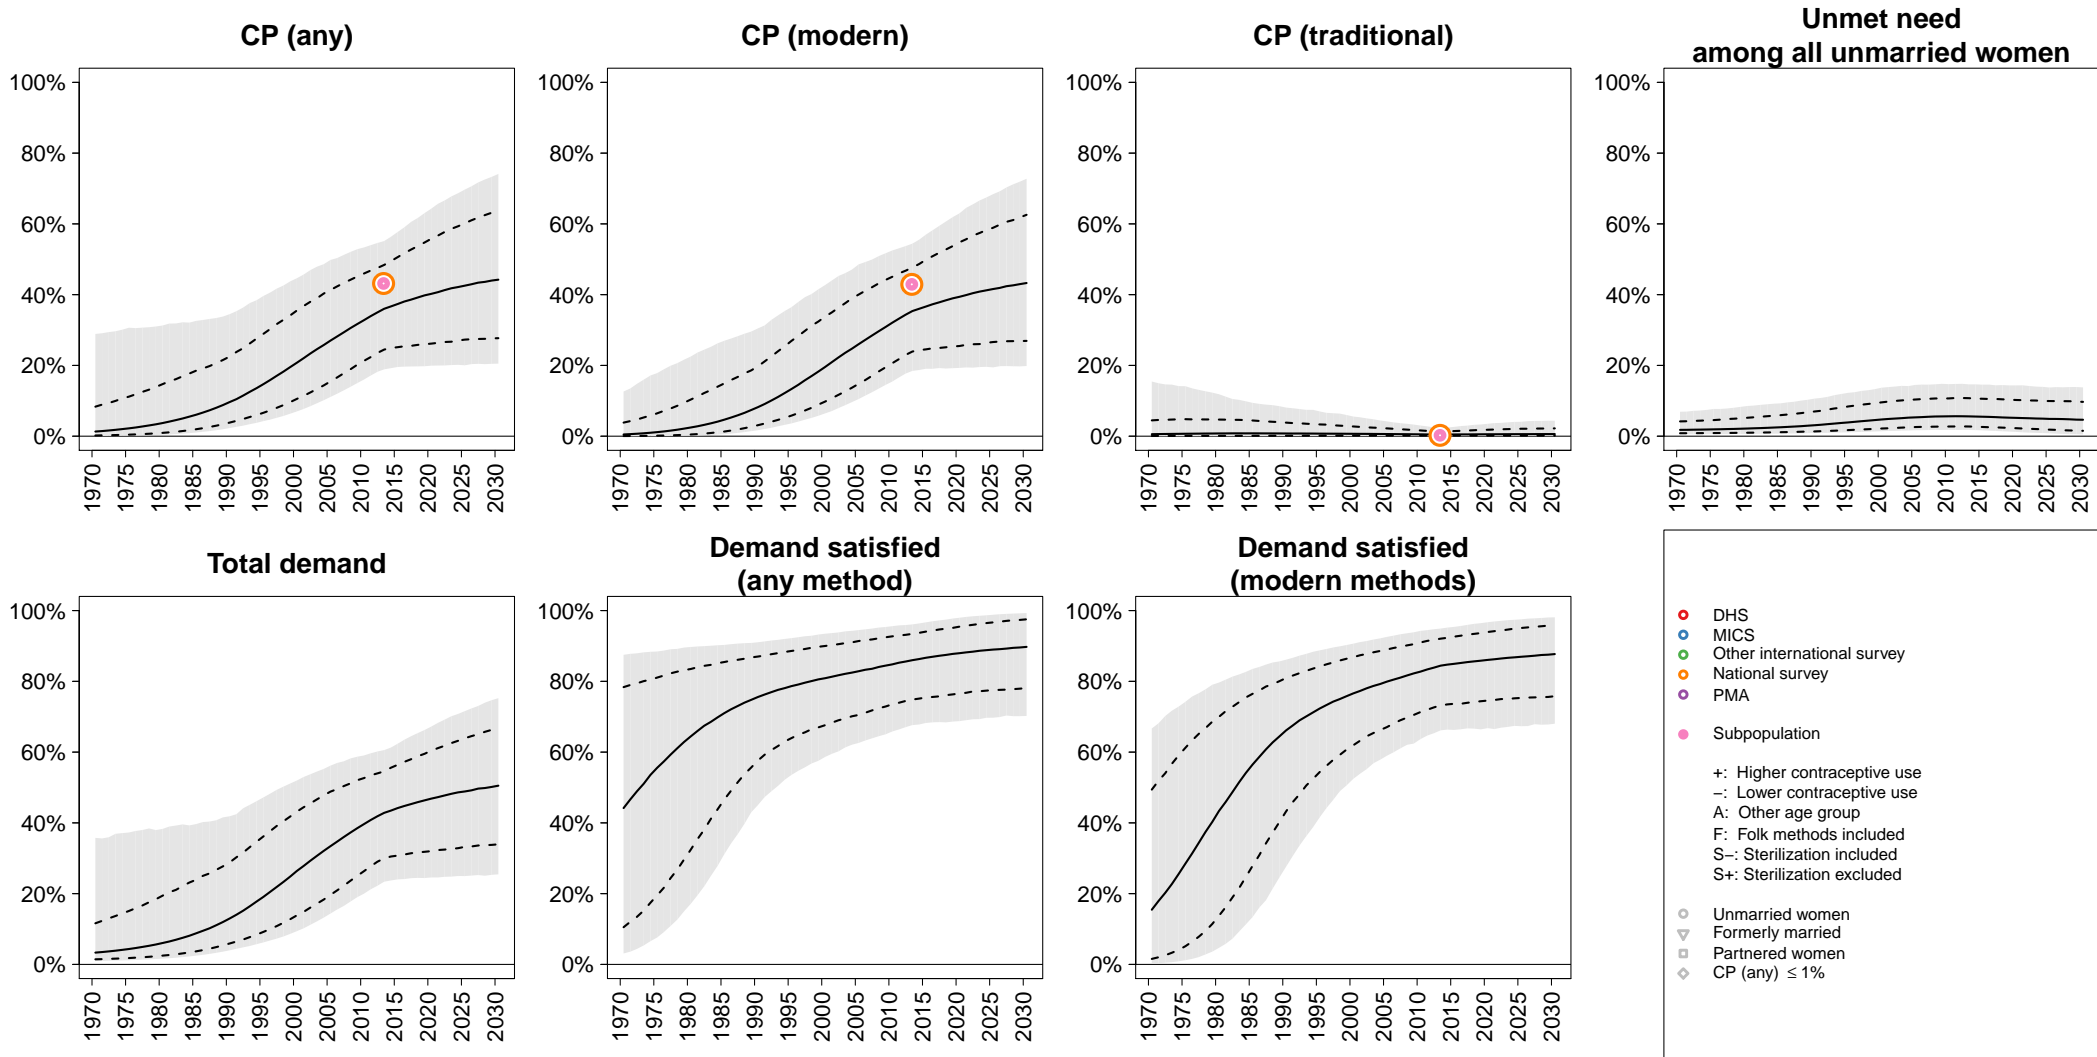

Armenia (Western Asia, SA Group 0) --- Unmarried / Not In-Union

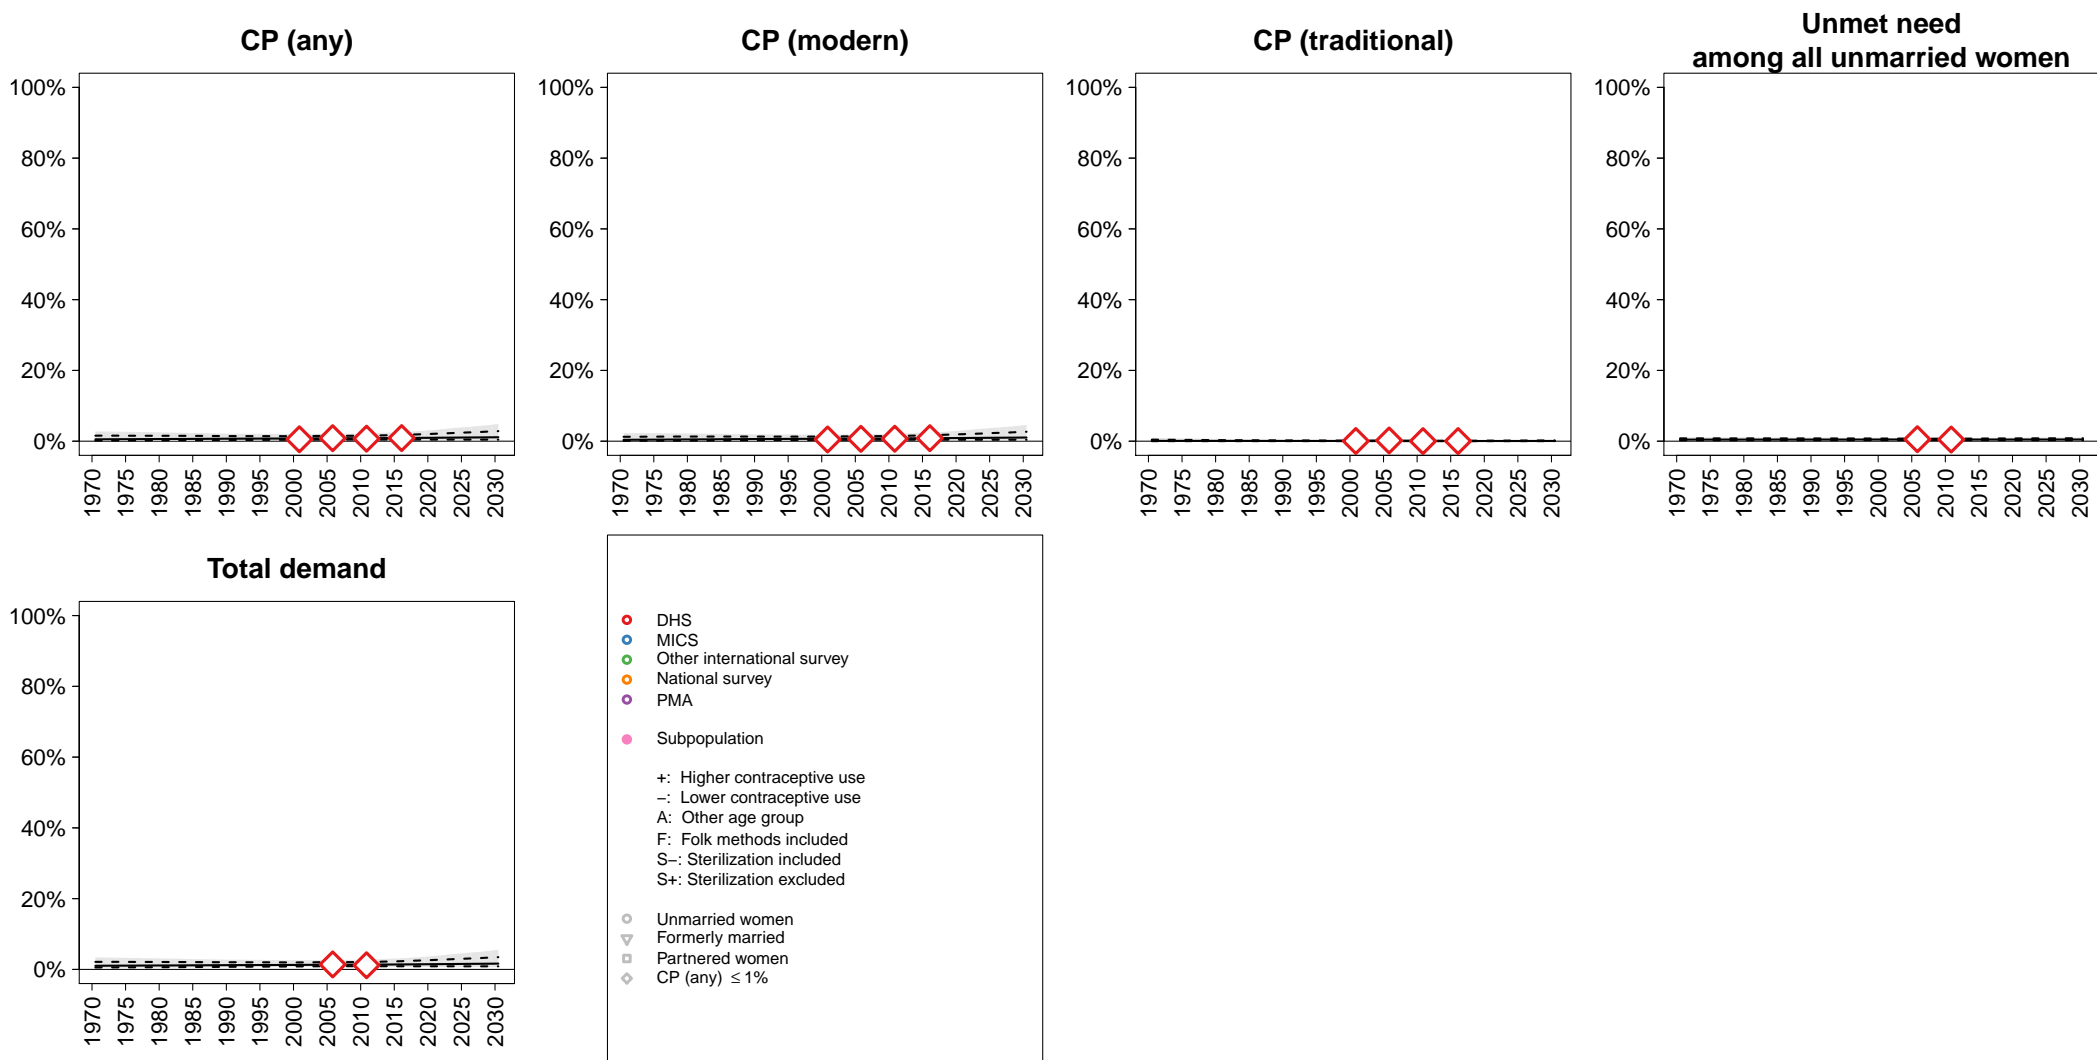

Australia (Australia and New Zealand, SA Group 1) --- Unmarried / Not In-Union

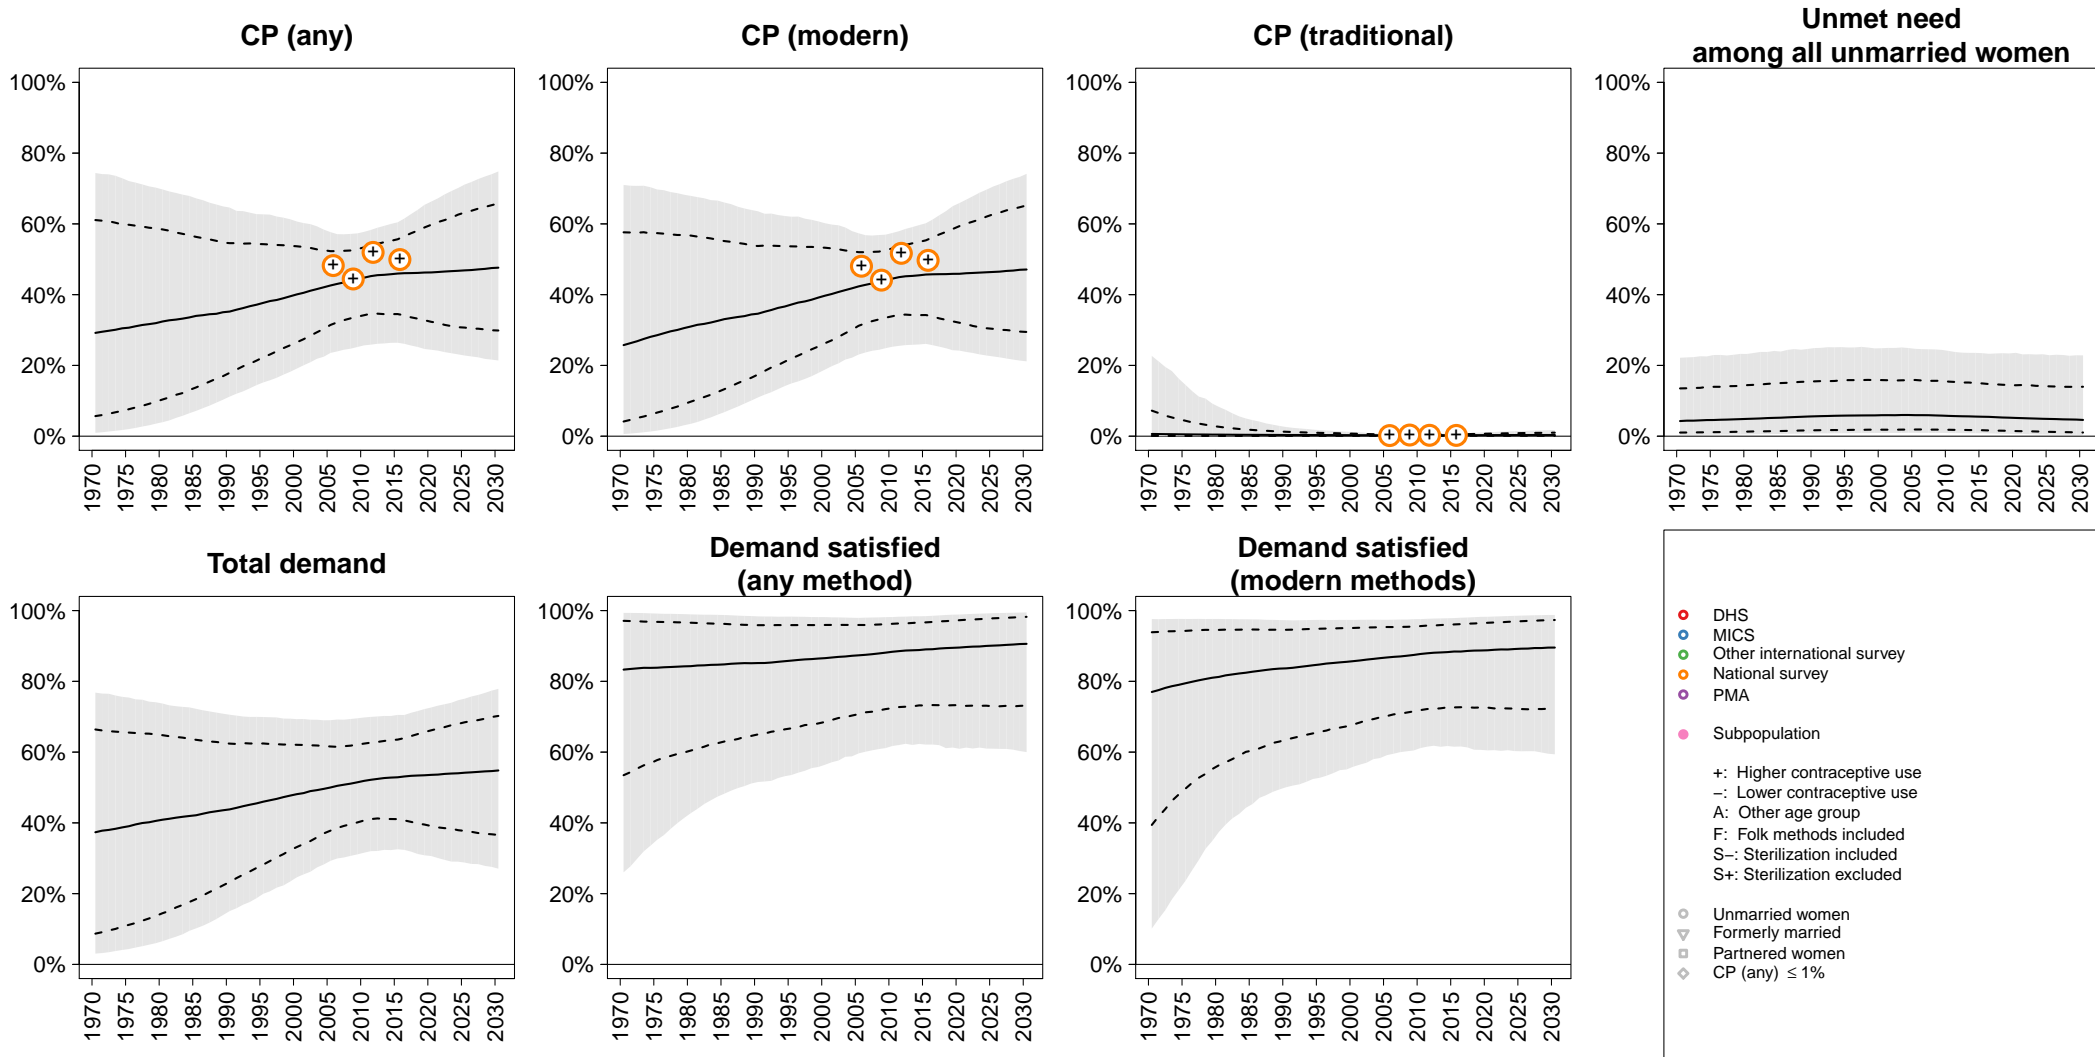

Austria (Western Europe, SA Group 1) --- Unmarried / Not In-Union

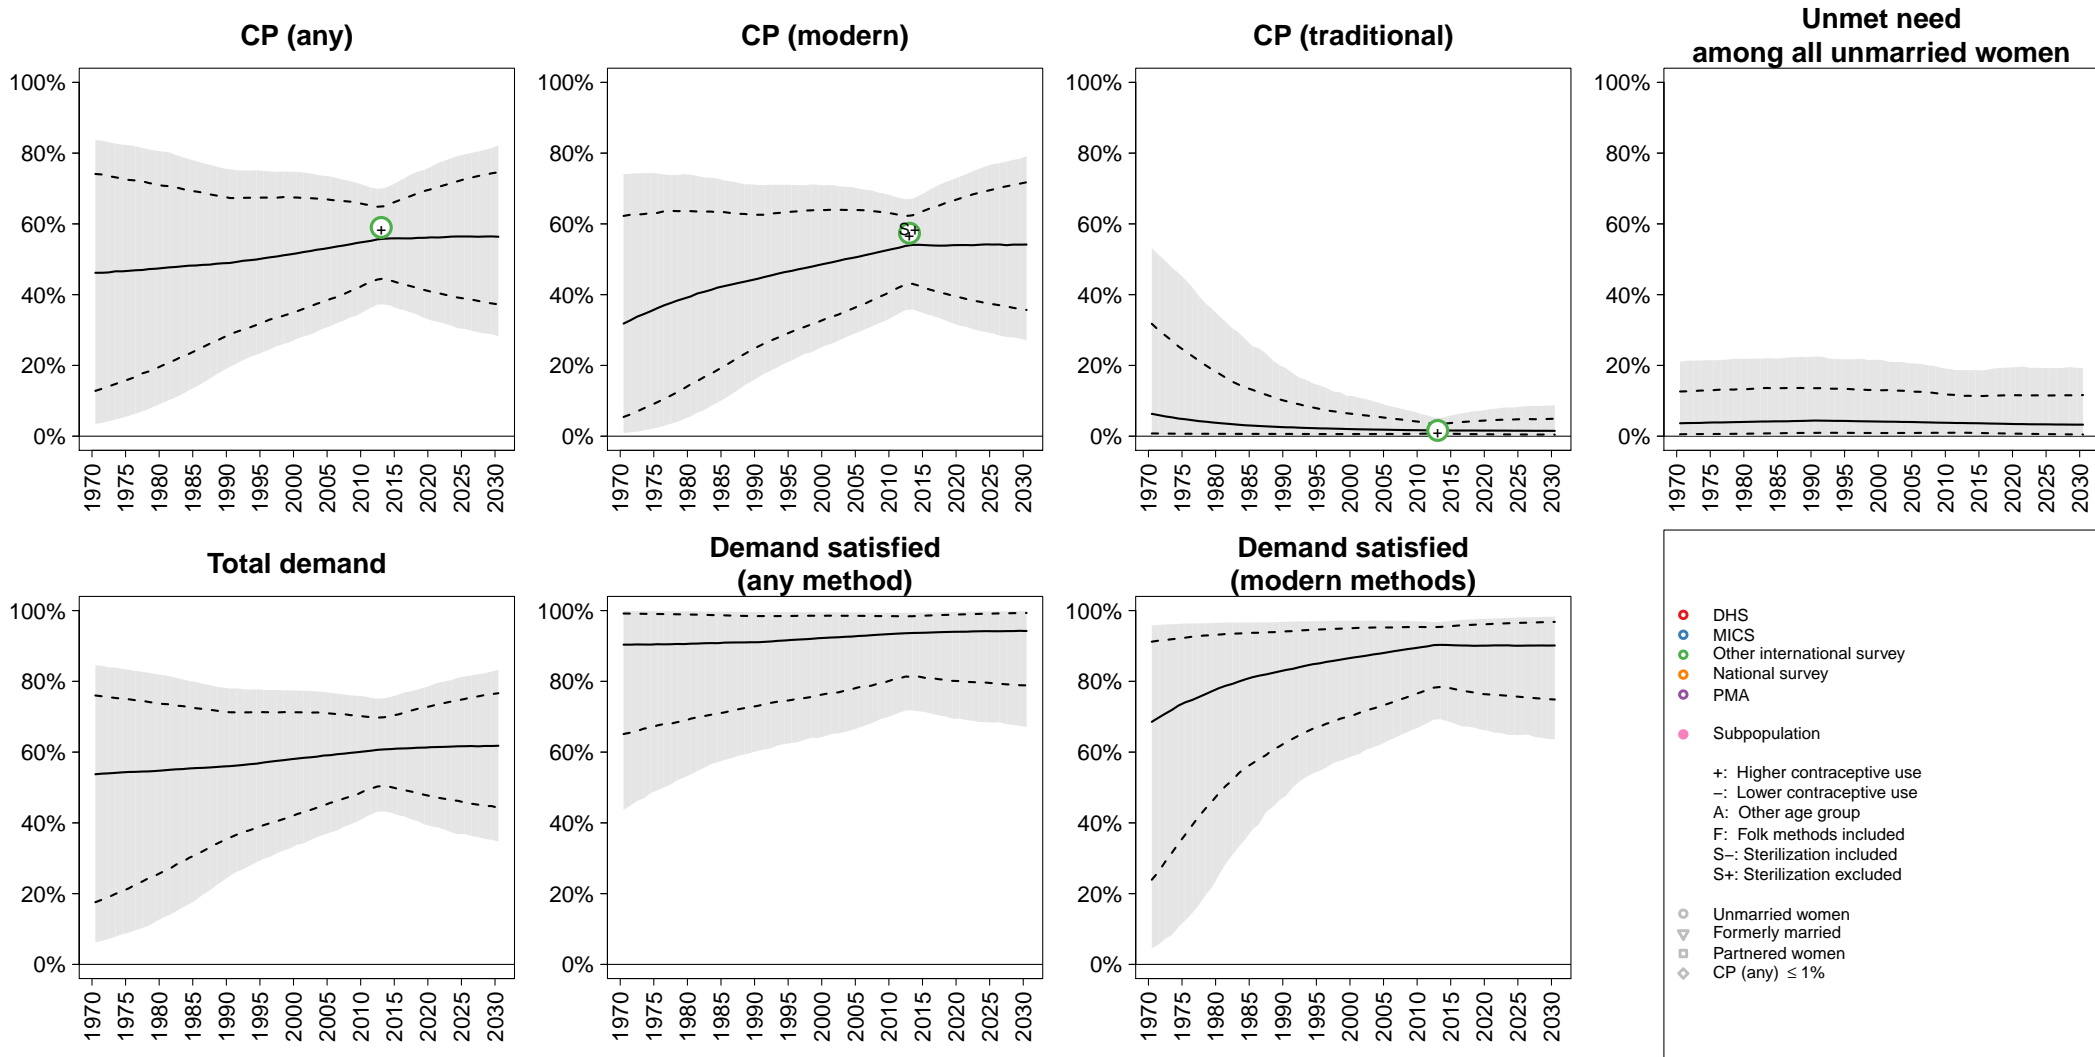

Azerbaijan (Western Asia, SA Group 0) --- Unmarried / Not In-Union

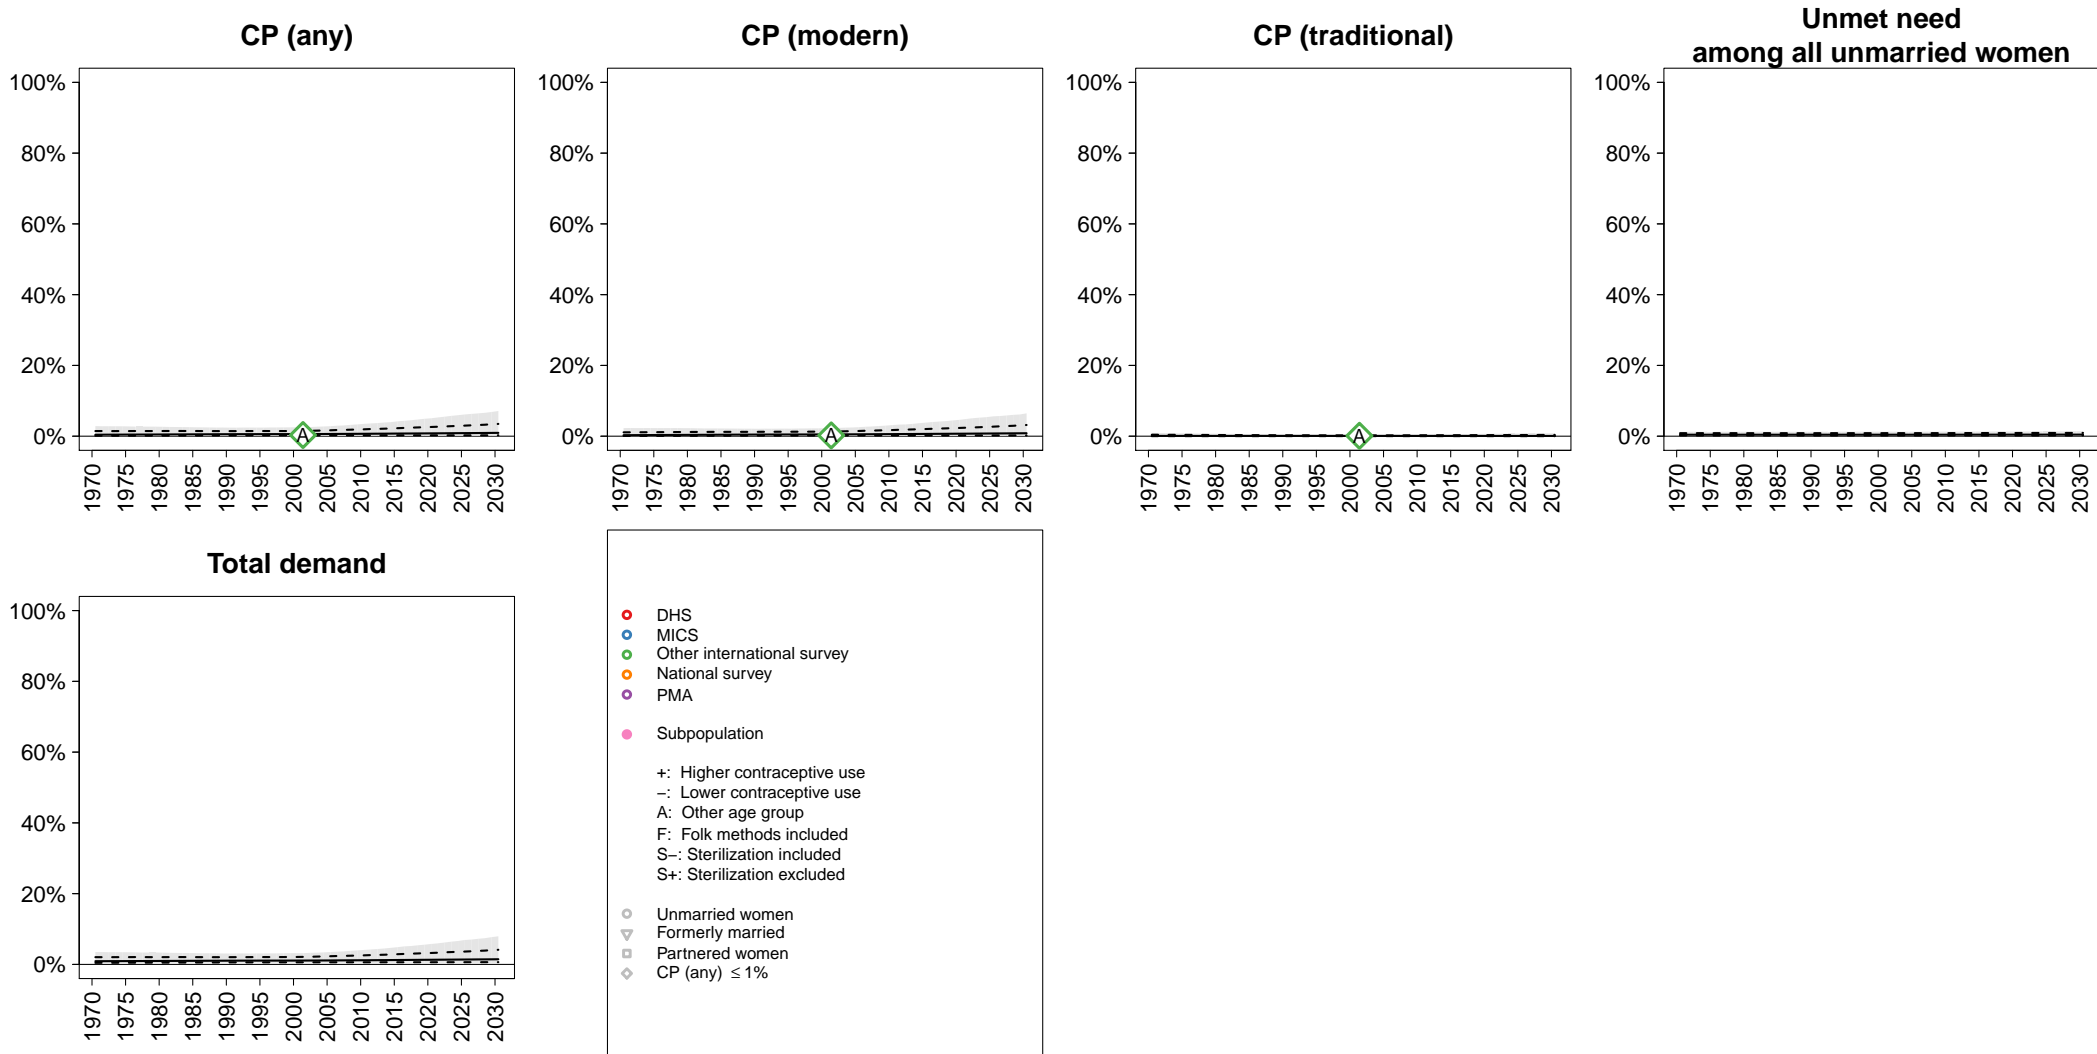

Bahamas (Caribbean, SA Group 1) --- Unmarried / Not In-Union

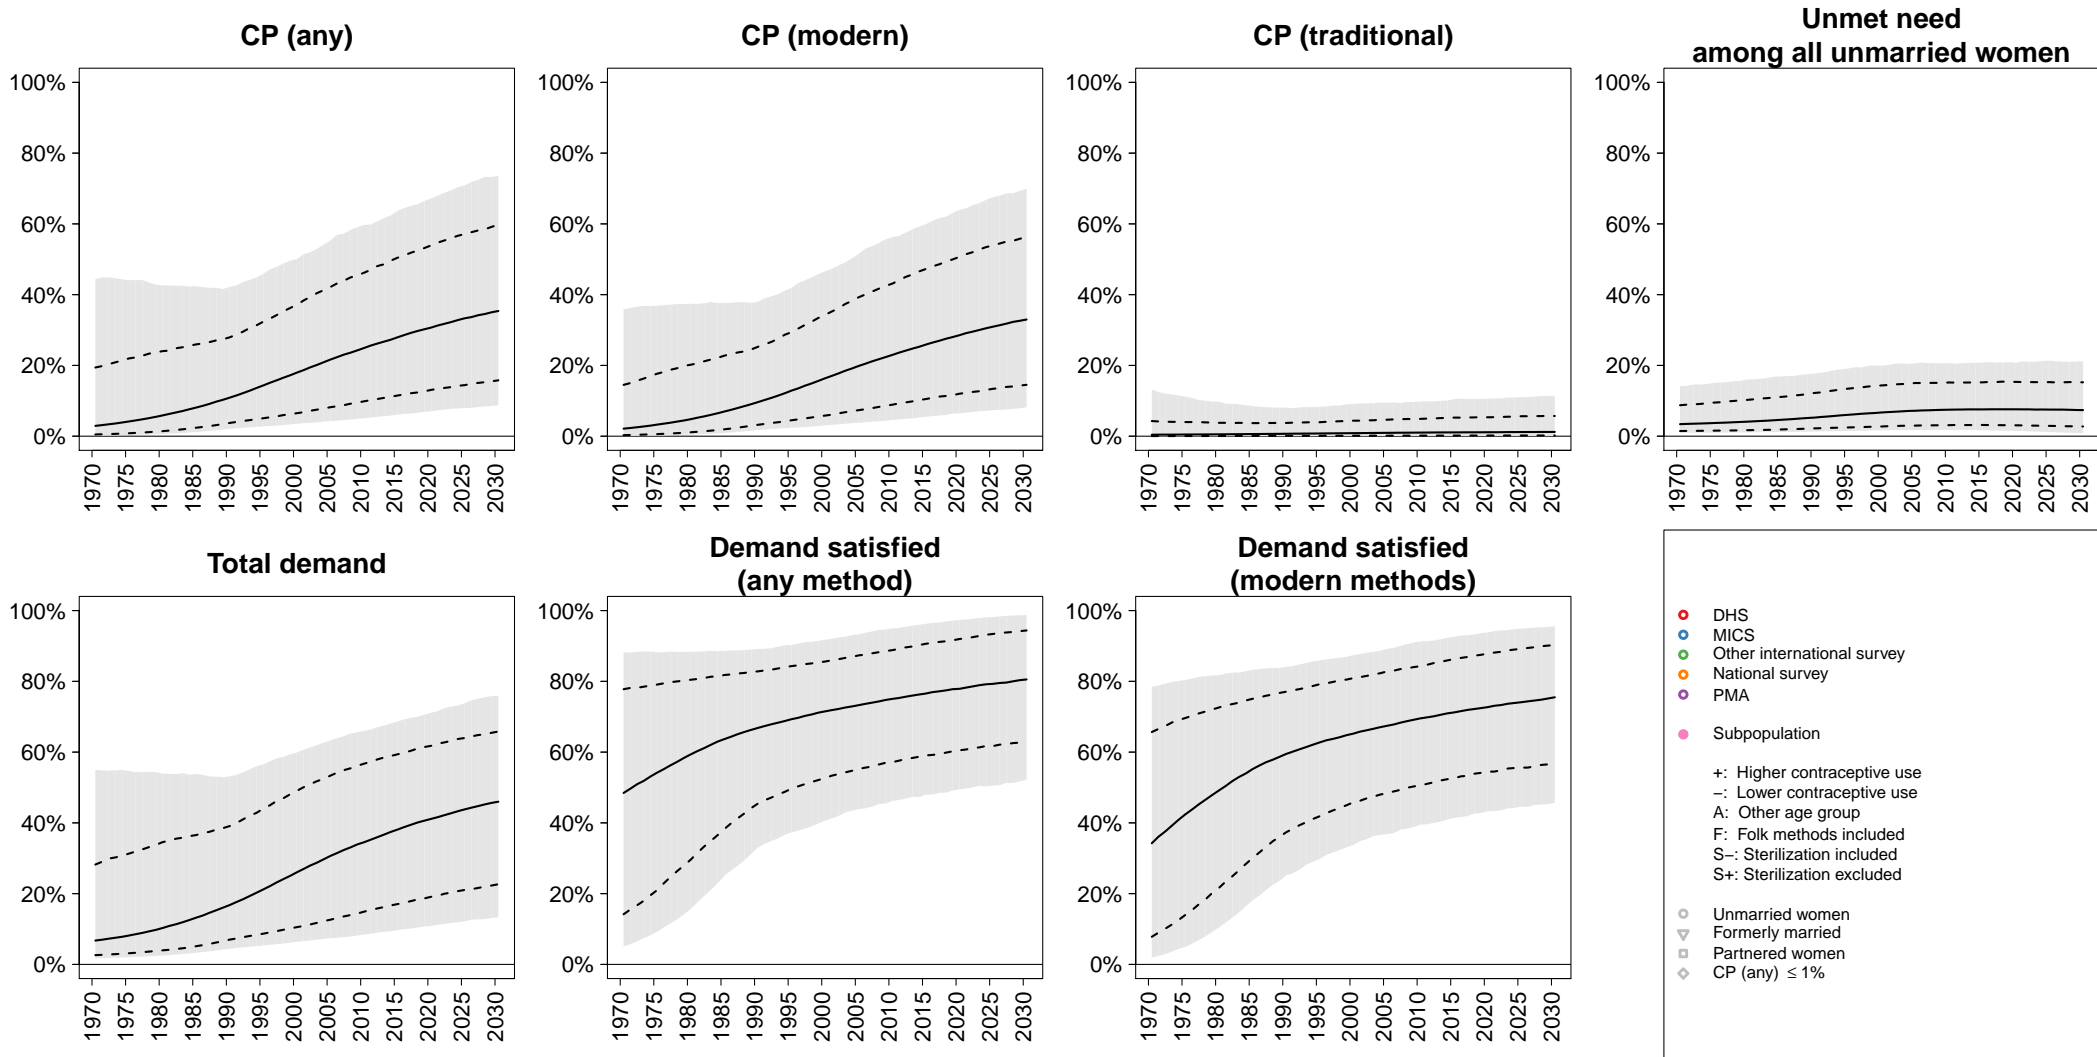

Bahrain (Western Asia, SA Group 0) --- Unmarried / Not In-Union

CP (any)

CP (modern)

CP (traditional)

Unmet need among all unmarried women

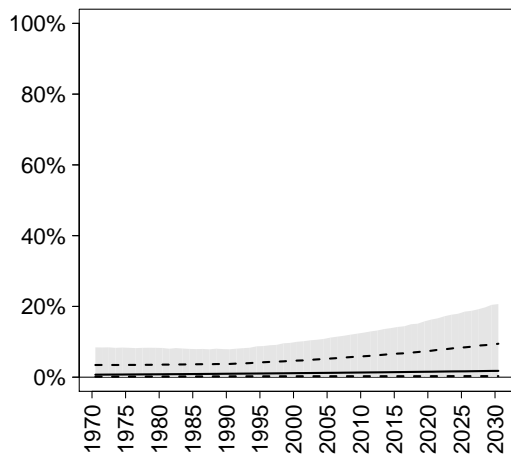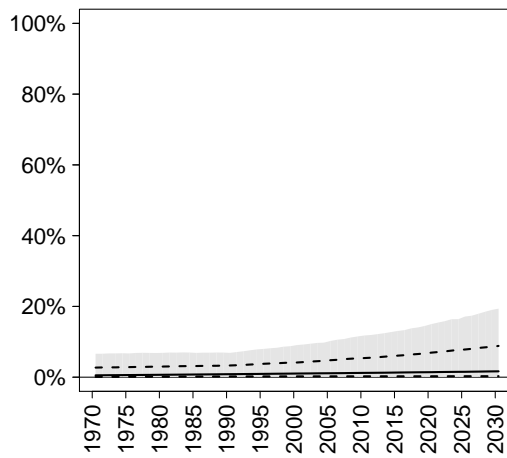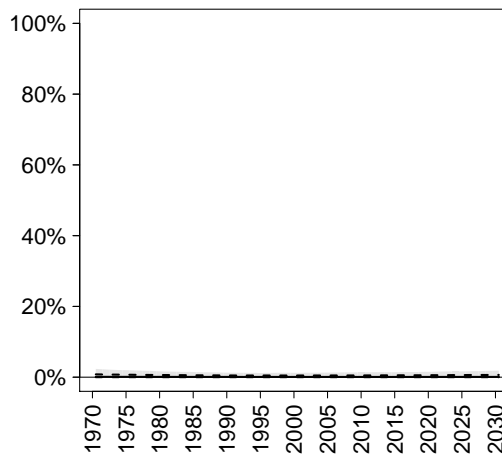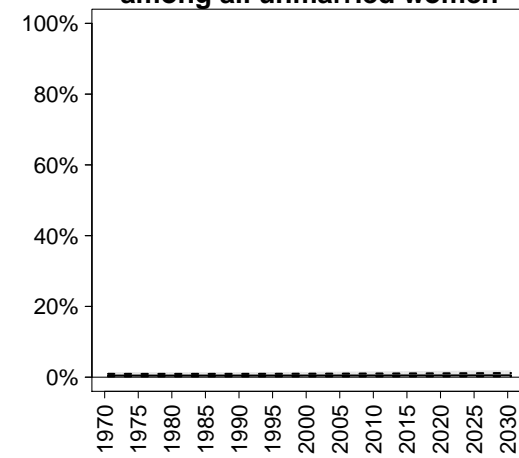

Total demand

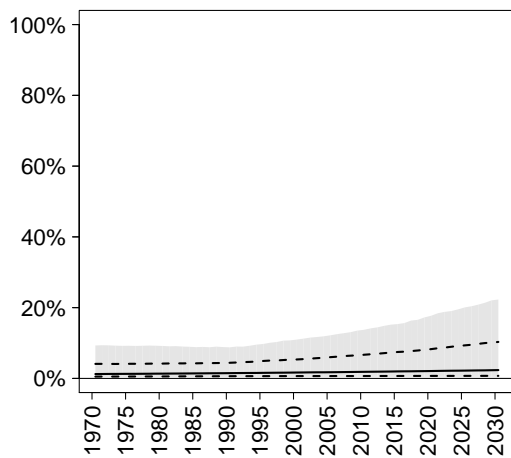

- DHS
- MICS
- Other international survey
- National survey
- PMA
- Subpopulation
- +: Higher contraceptive use
- : Lower contraceptive use
- A: Other age group
- F: Folk methods included
- S-: Sterilization included
- S+: Sterilization excluded
- Unmarried women
- ▽ Formerly married
- ◻ Partnered women
- ◇ CP (any) ≤ 1%



Bangladesh (Southern Asia, SA Group 0) --- Unmarried / Not In-Union

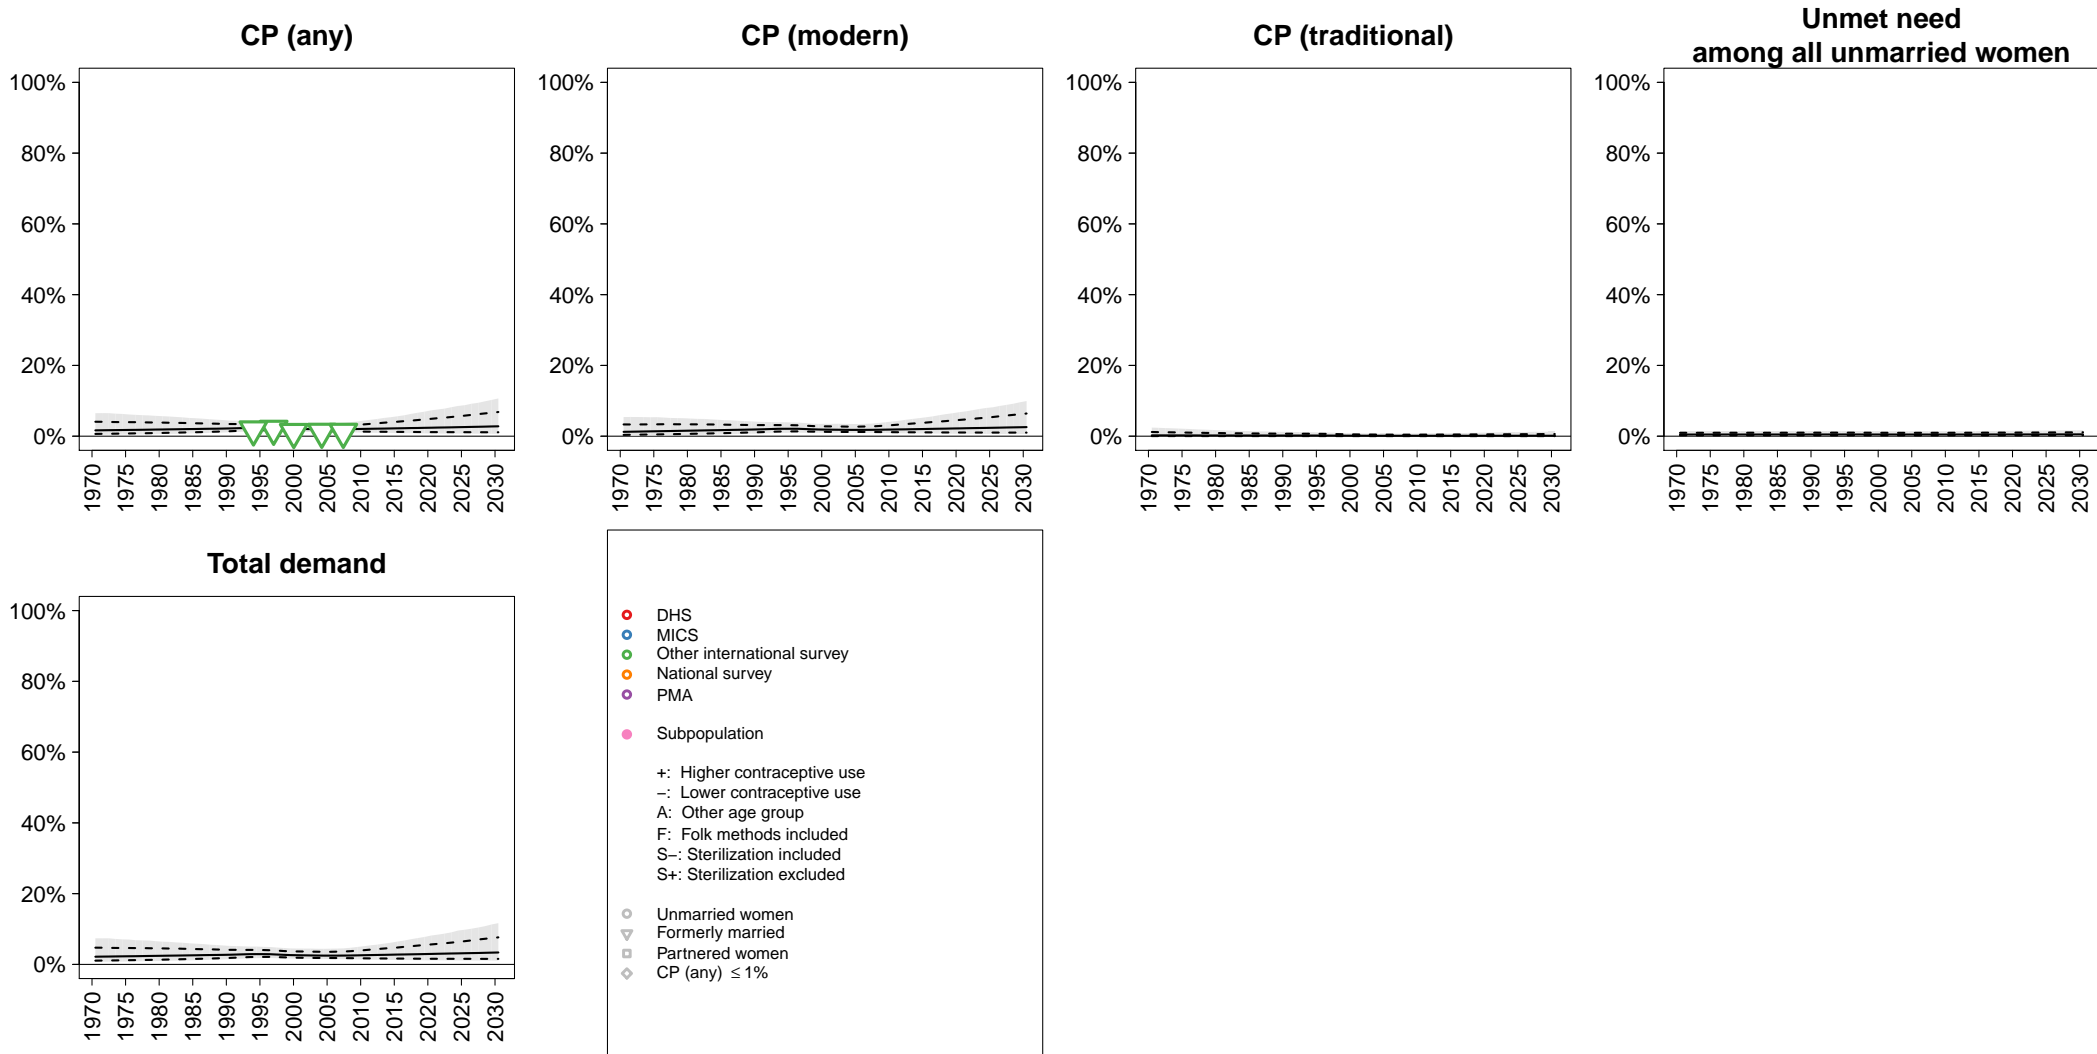

Barbados (Caribbean, SA Group 1) --- Unmarried / Not In-Union

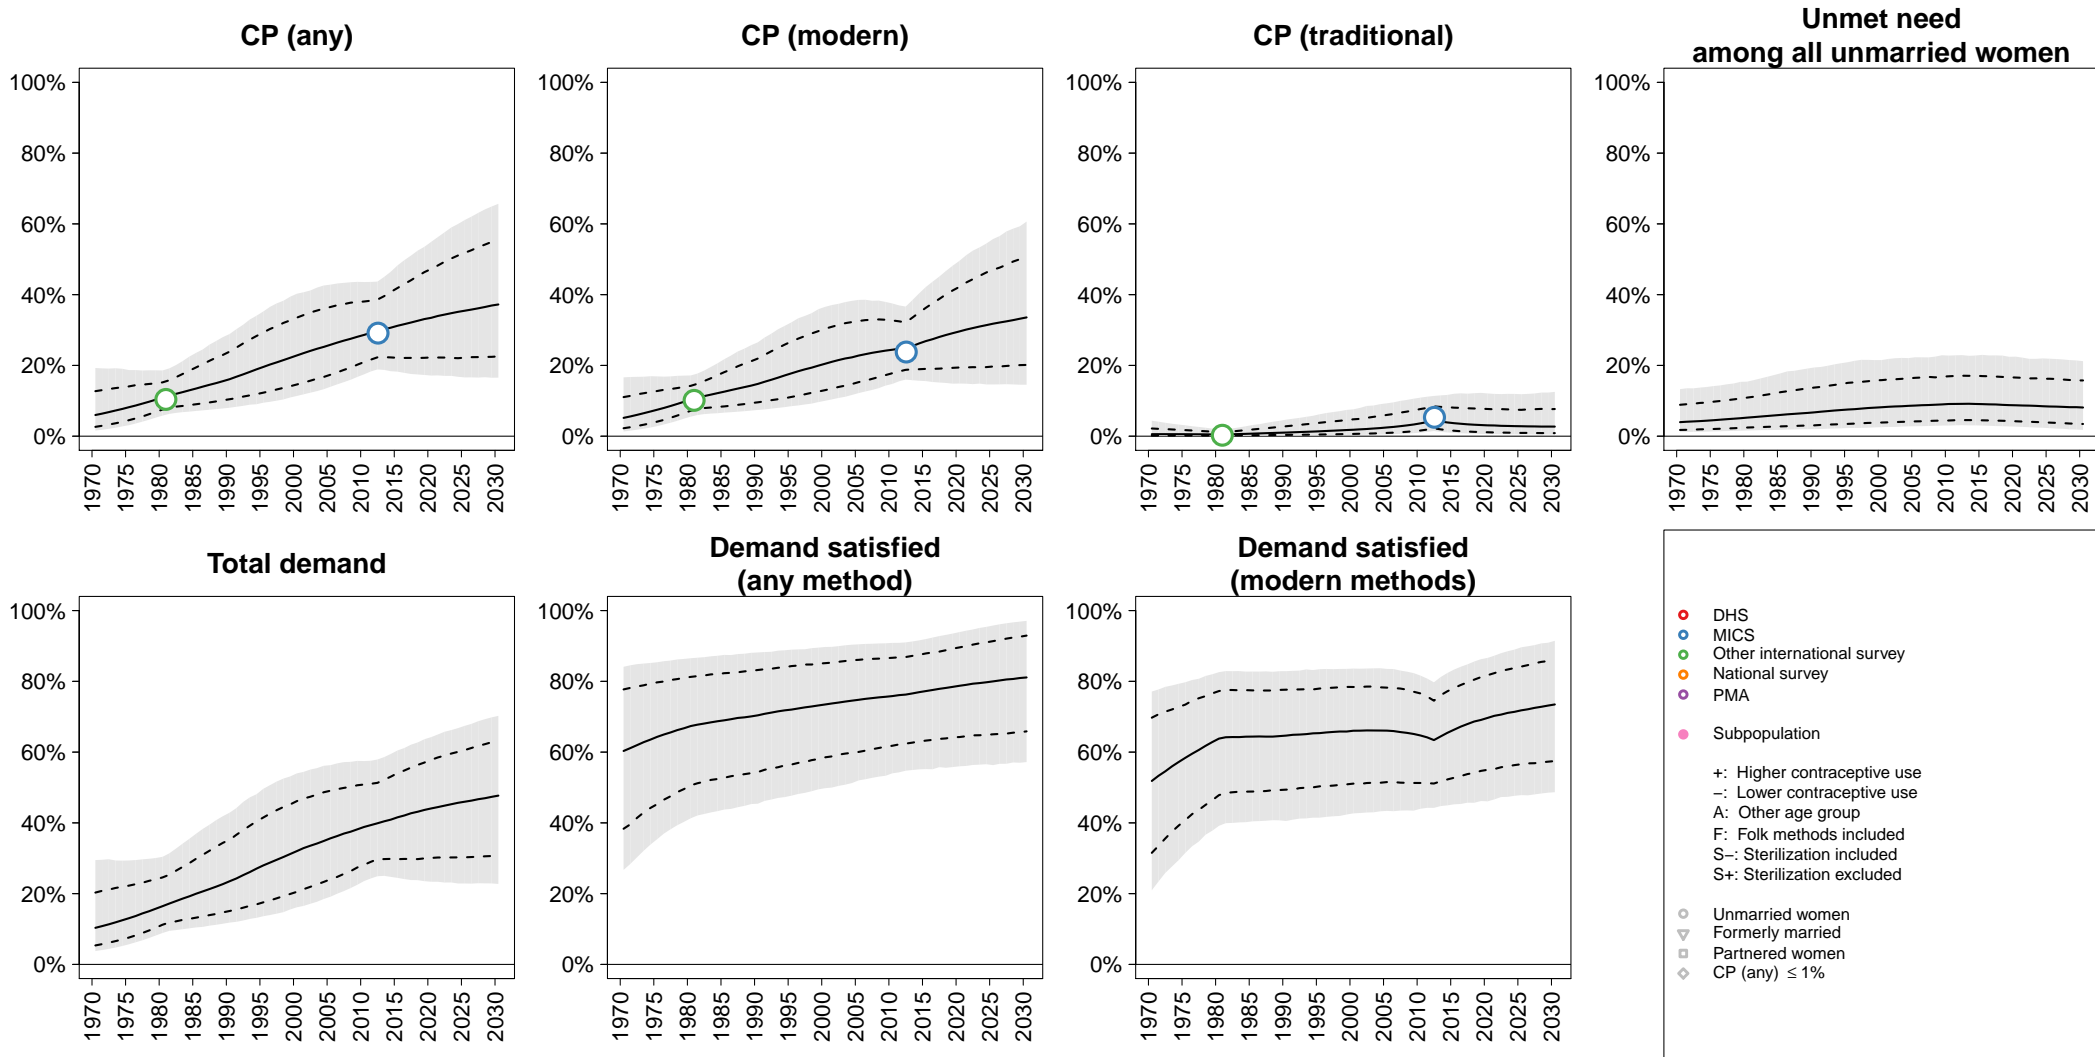

Belarus (Eastern Europe, SA Group 1) --- Unmarried / Not In-Union

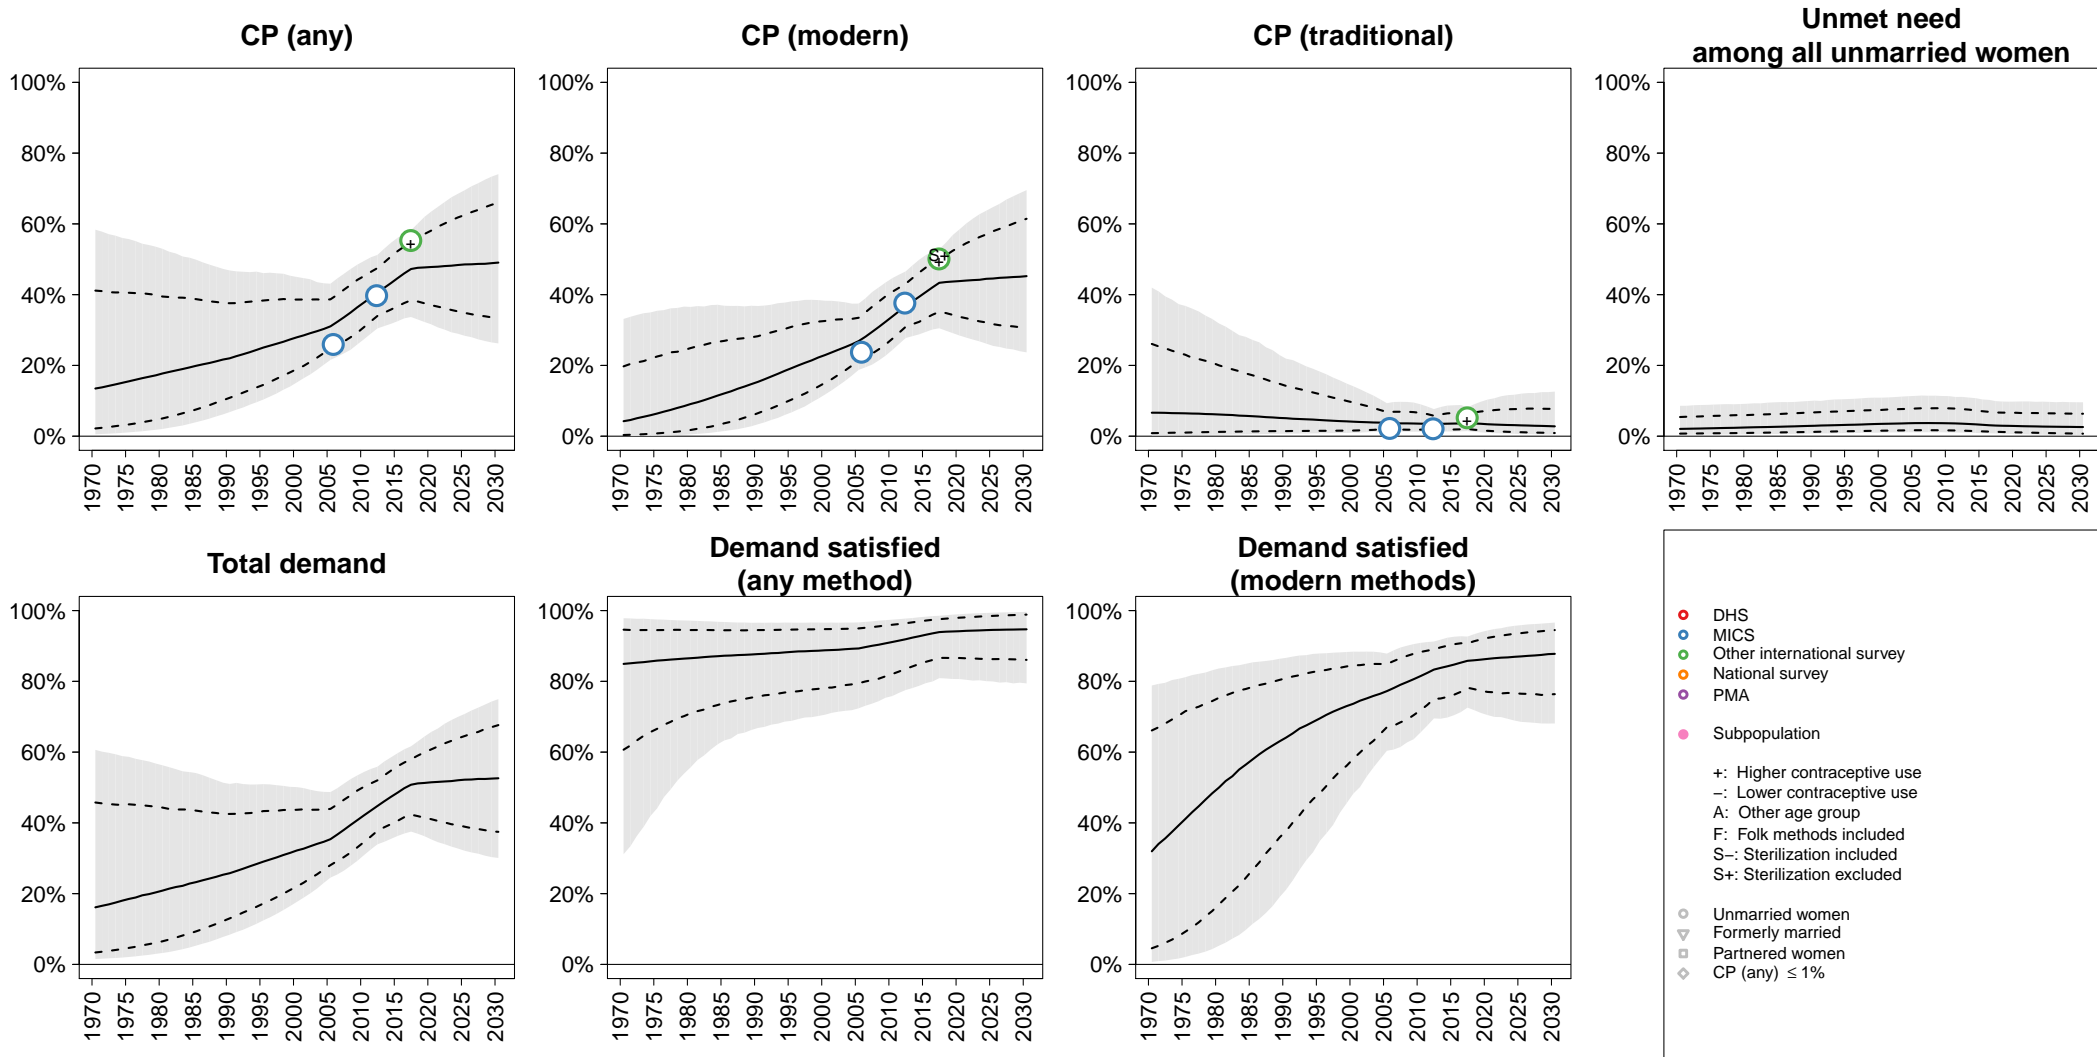

Belgium (Western Europe, SA Group 1) --- Unmarried / Not In-Union

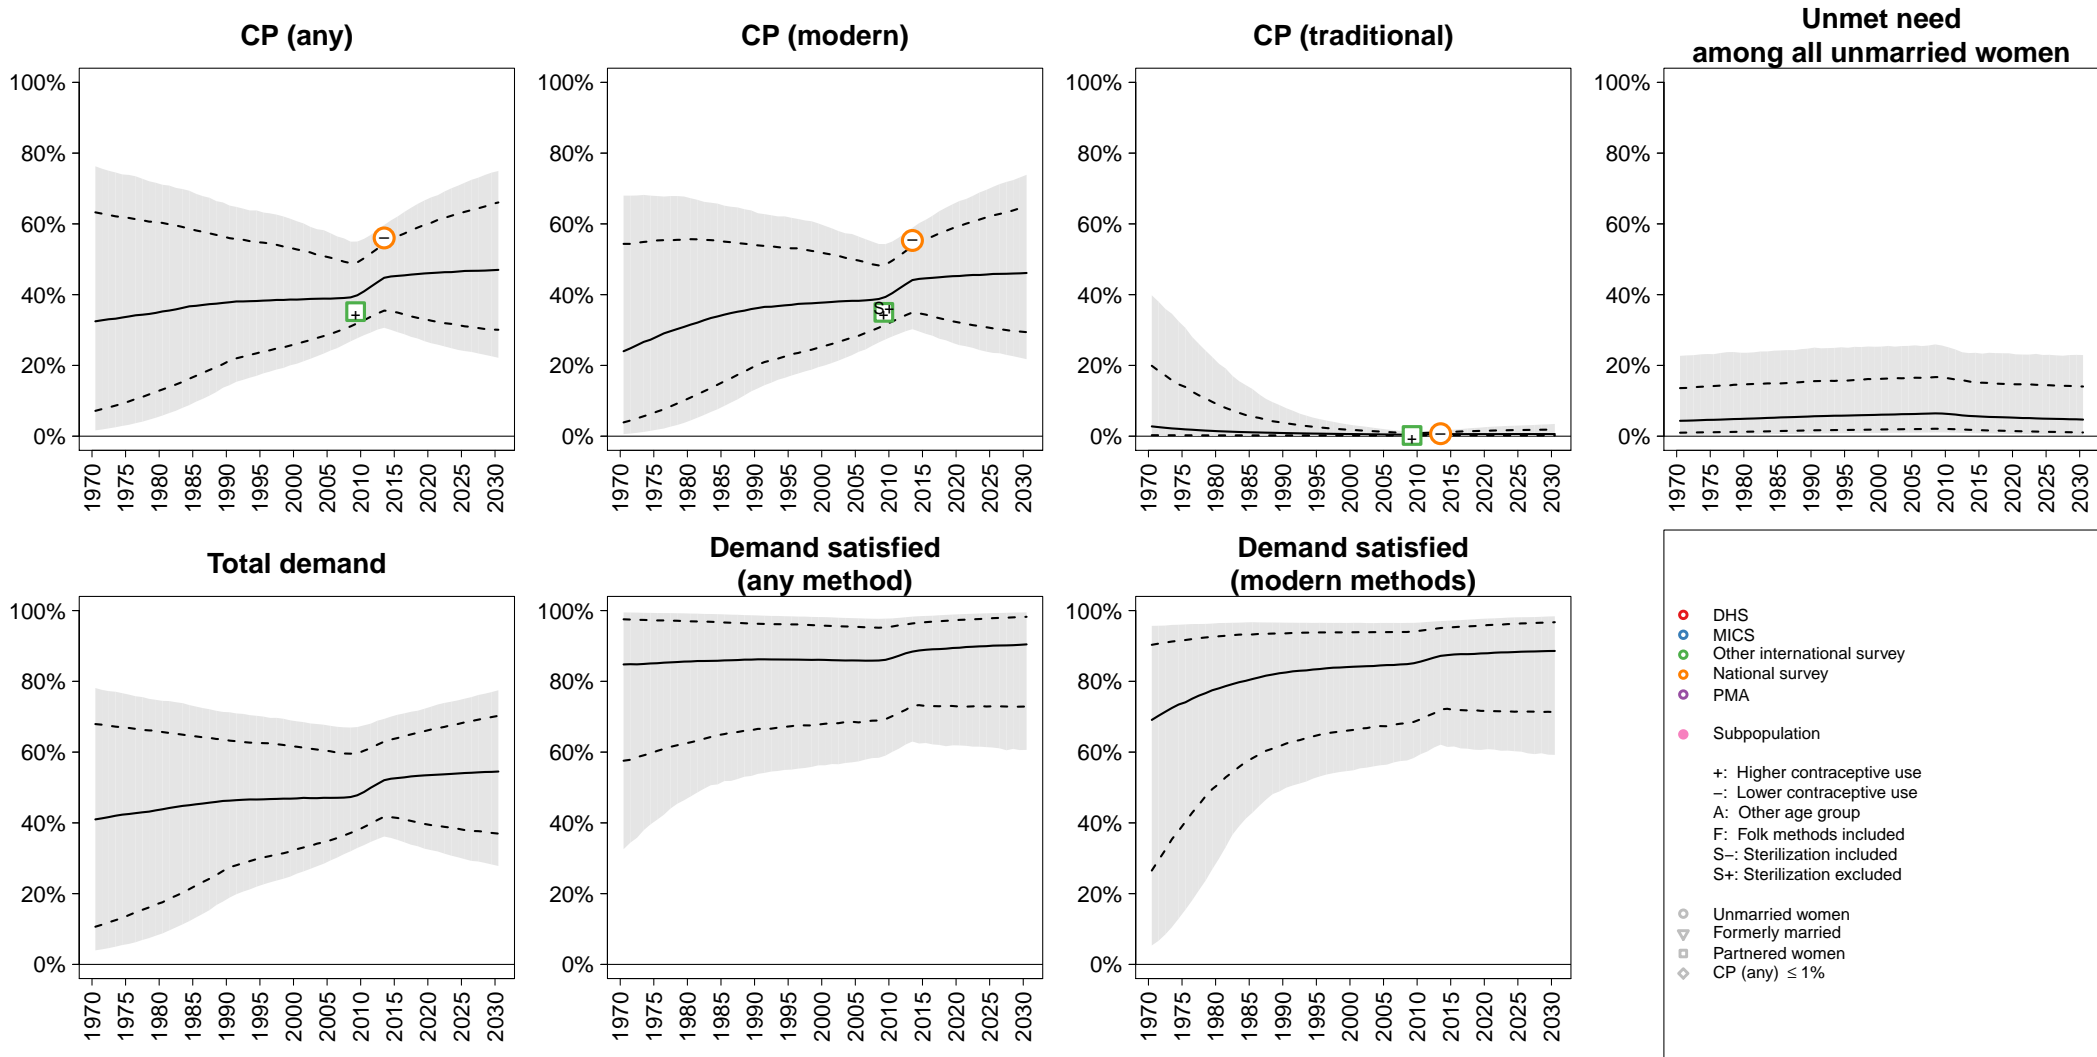

Belize (Central America, SA Group 1) --- Unmarried / Not In-Union

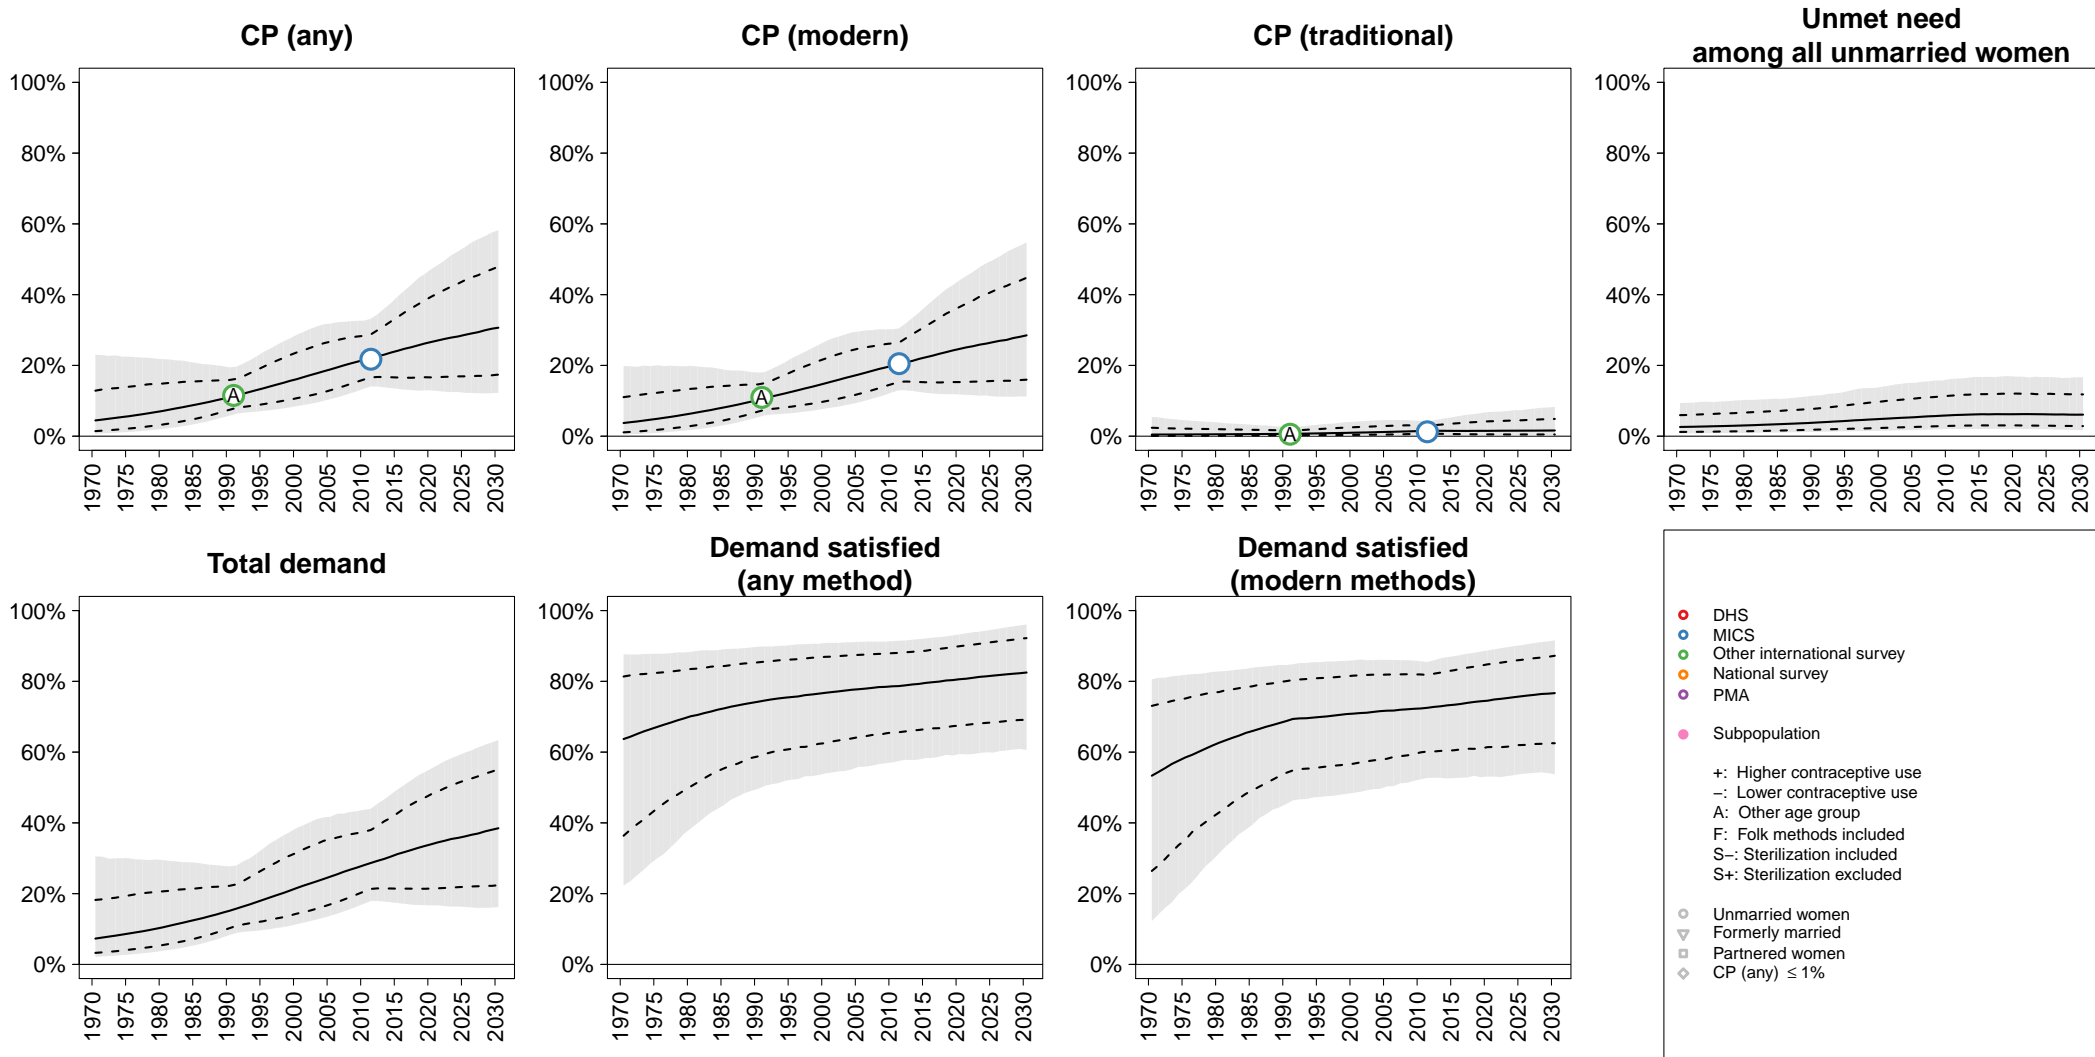

Benin (Western Africa, SA Group 1) --- Unmarried / Not In-Union

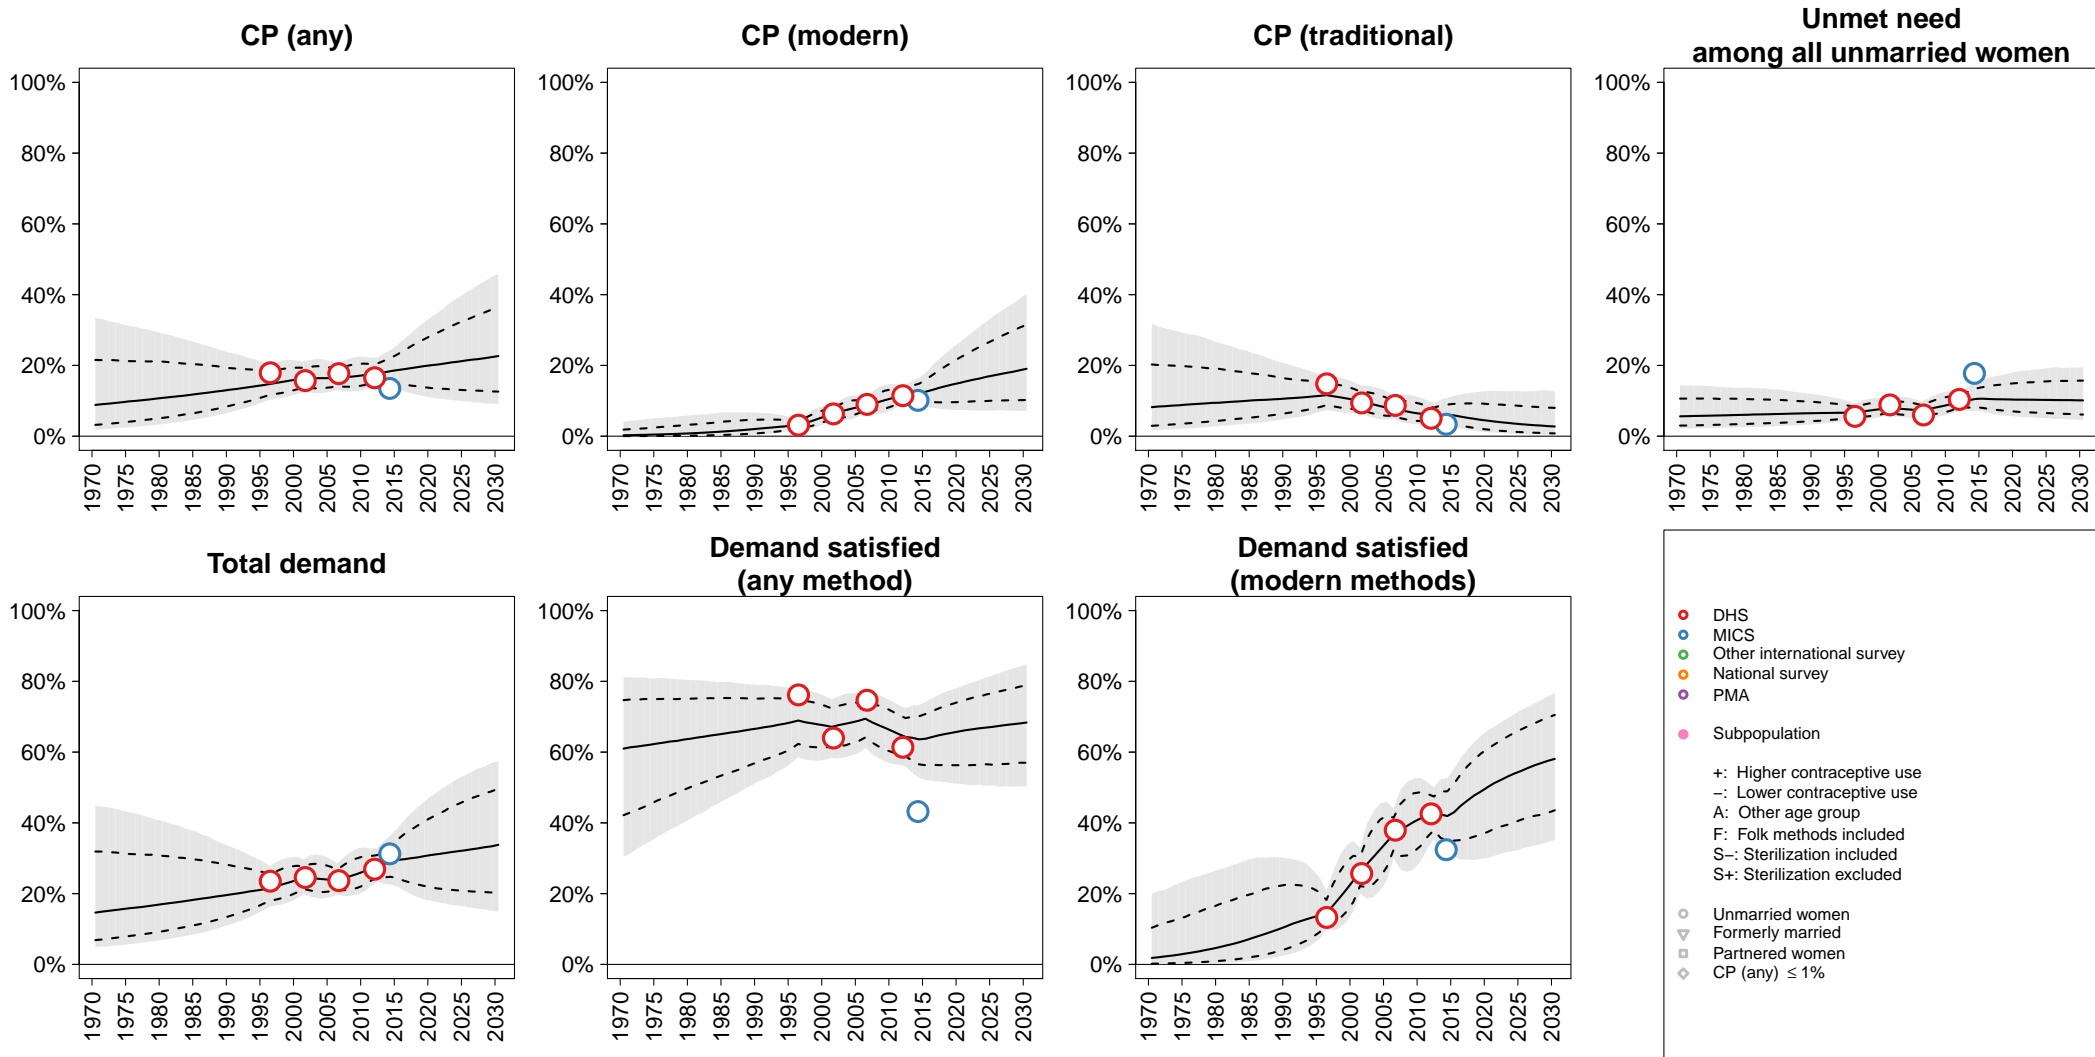

Bhutan (Southern Asia, SA Group 0) --- Unmarried / Not In-Union

CP (any)

CP (modern)

CP (traditional)

Unmet need among all unmarried women

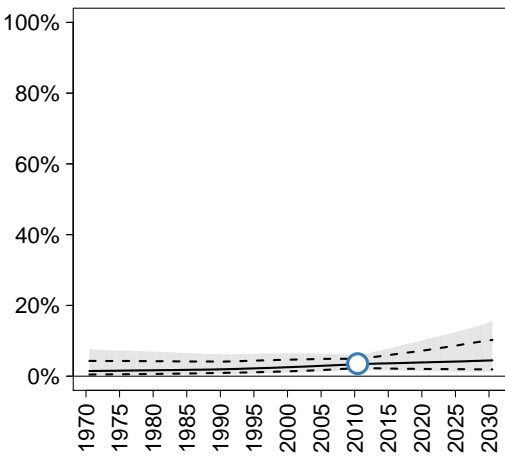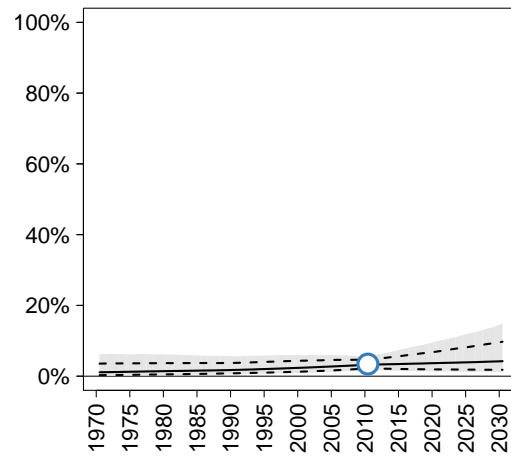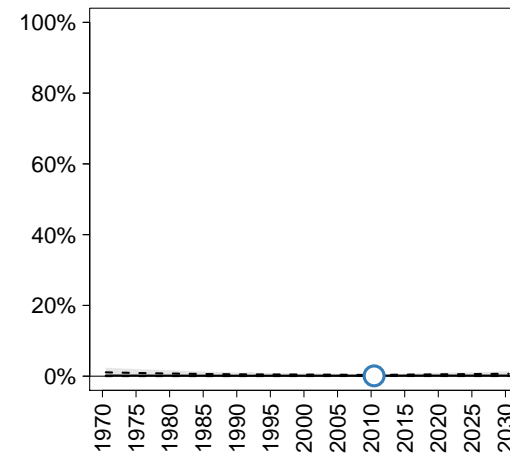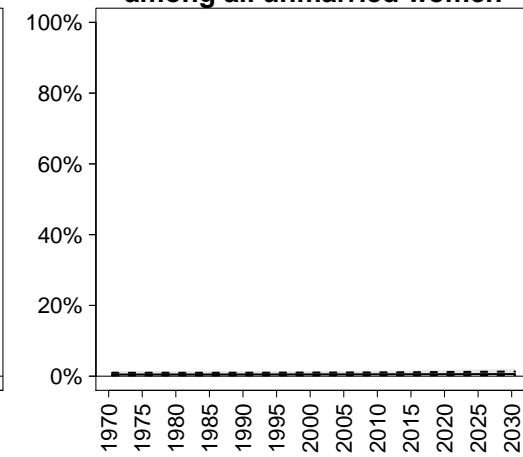

Total demand

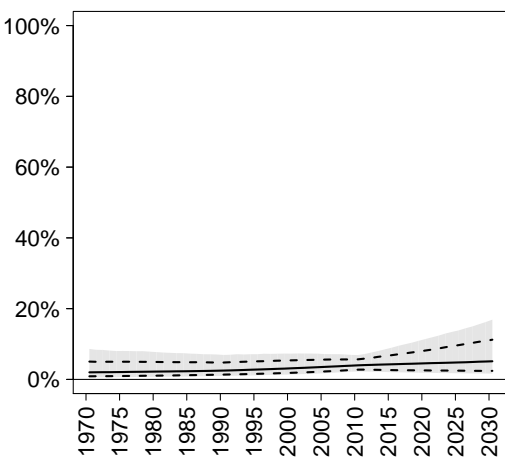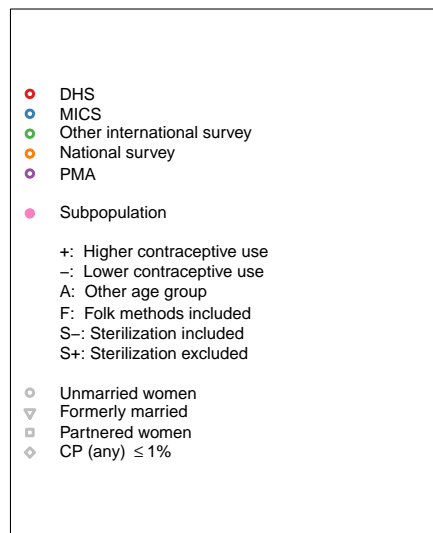

Bolivia, Plurinational State of (South America, SA Group 1) --- Unmarried / Not In-Union

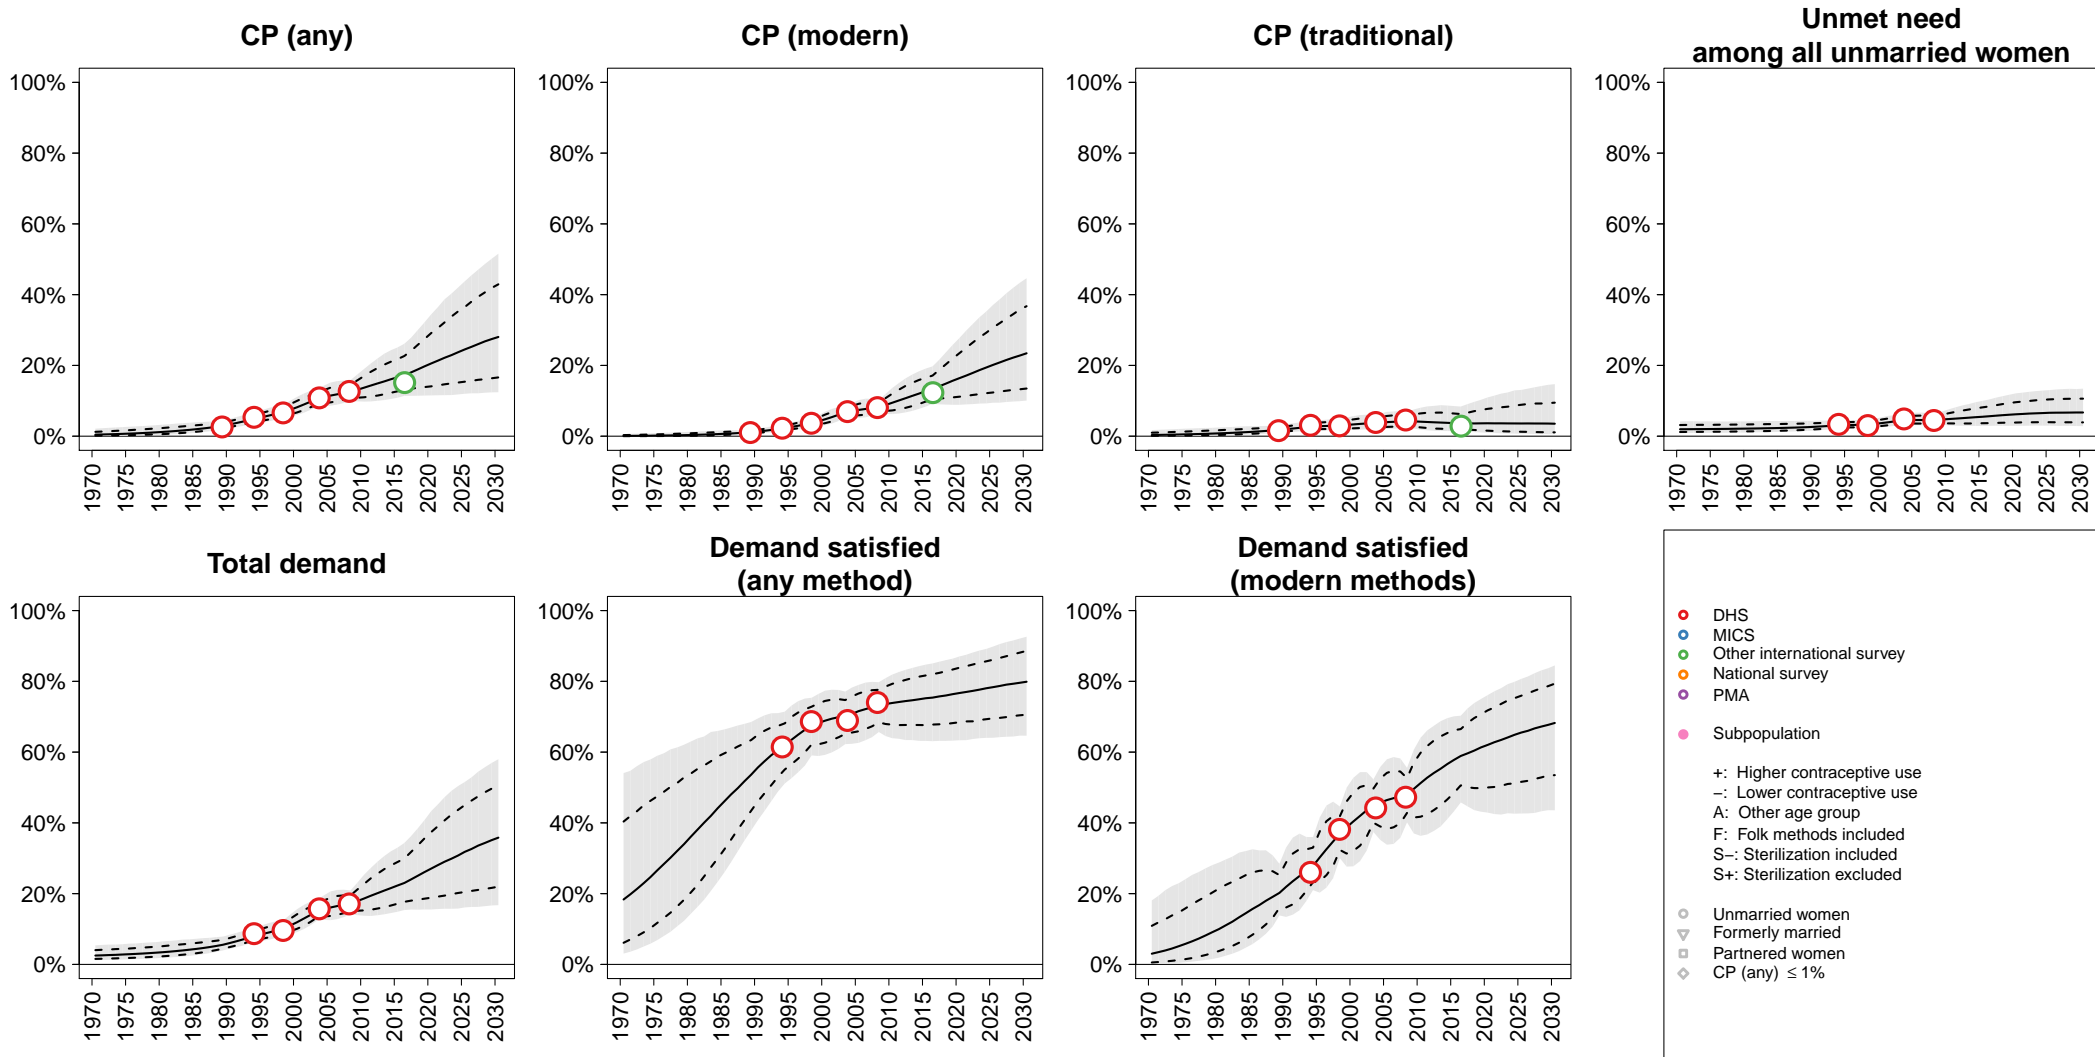



Bosnia and Herzegovina (Southern Europe, SA Group 1) --- Unmarried / Not In-Union

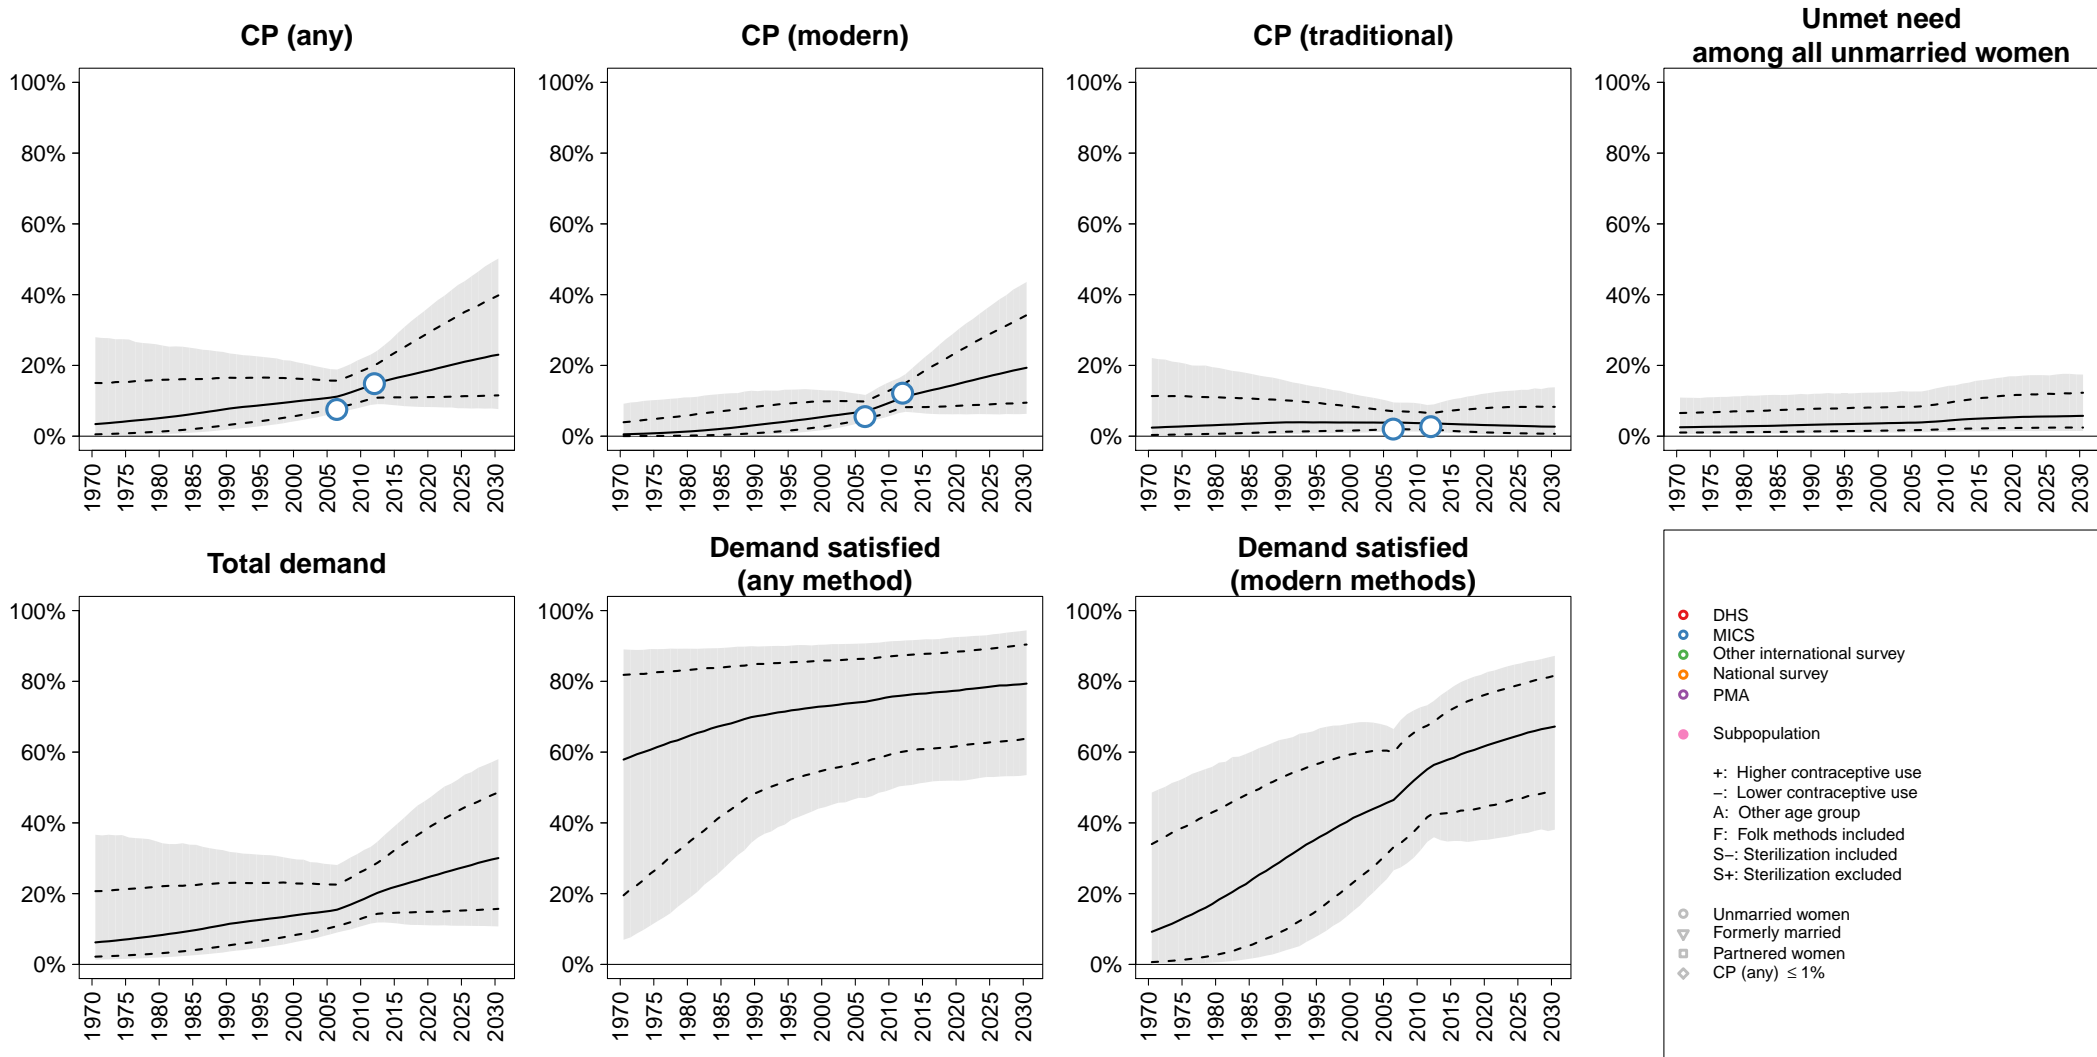

Botswana (Southern Africa, SA Group 1) --- Unmarried / Not In-Union

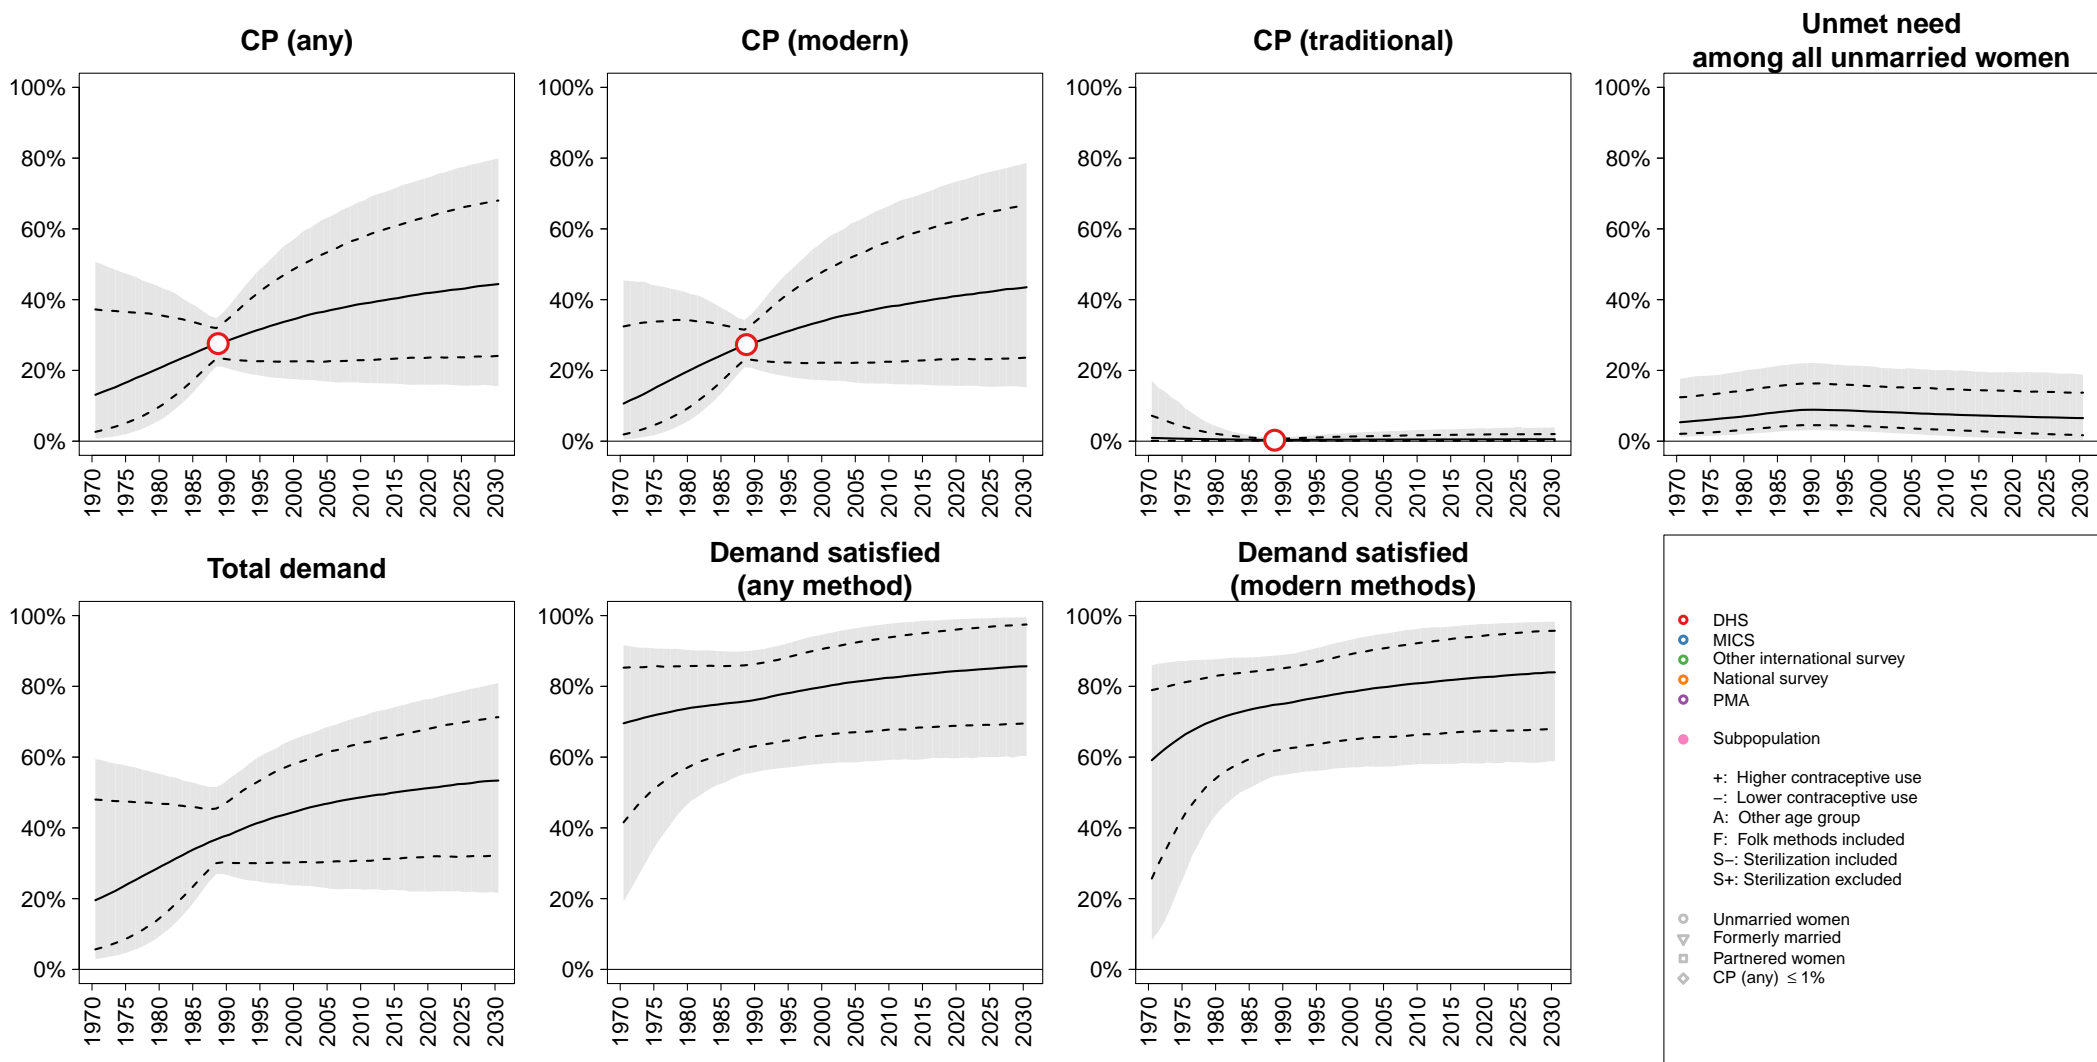

Brazil (South America, SA Group 1) --- Unmarried / Not In-Union

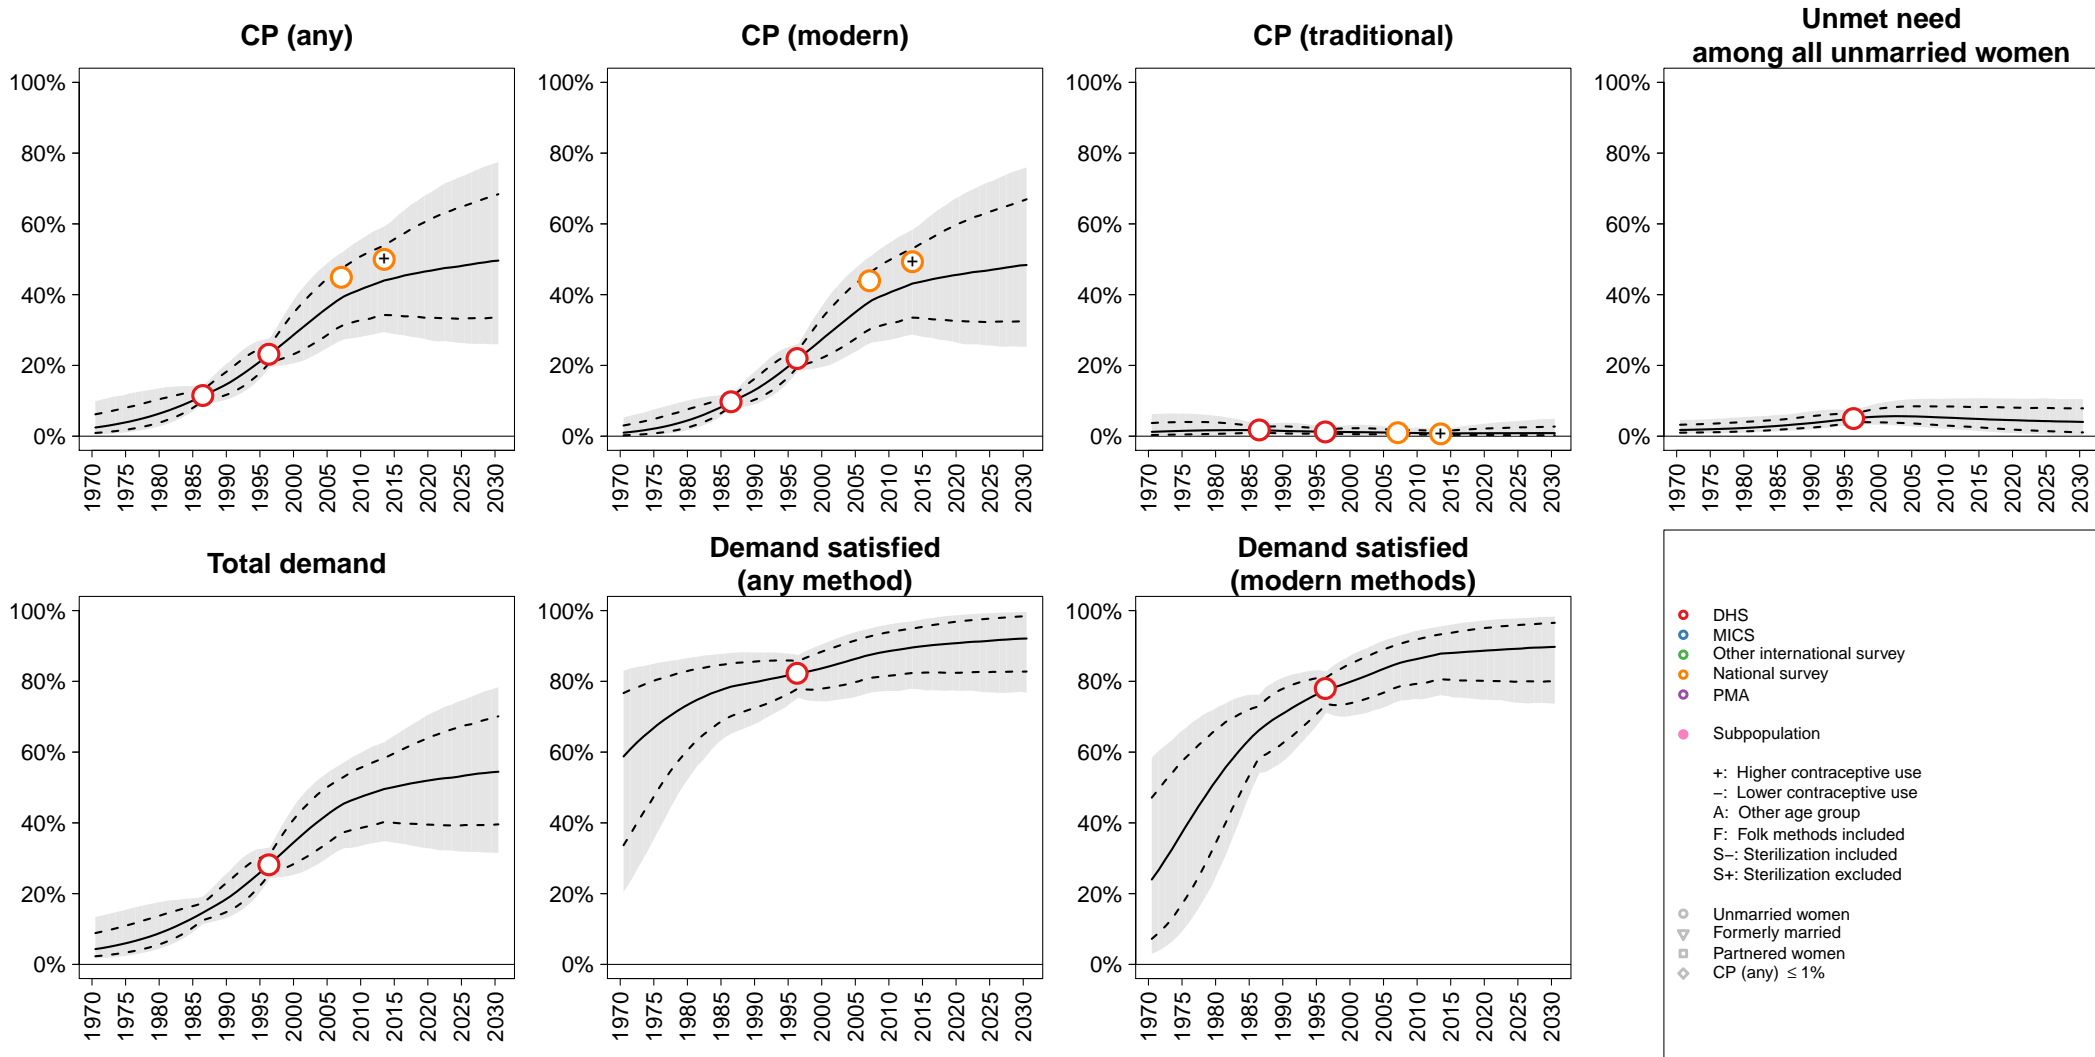

Bulgaria (Eastern Europe, SA Group 1) --- Unmarried / Not In-Union

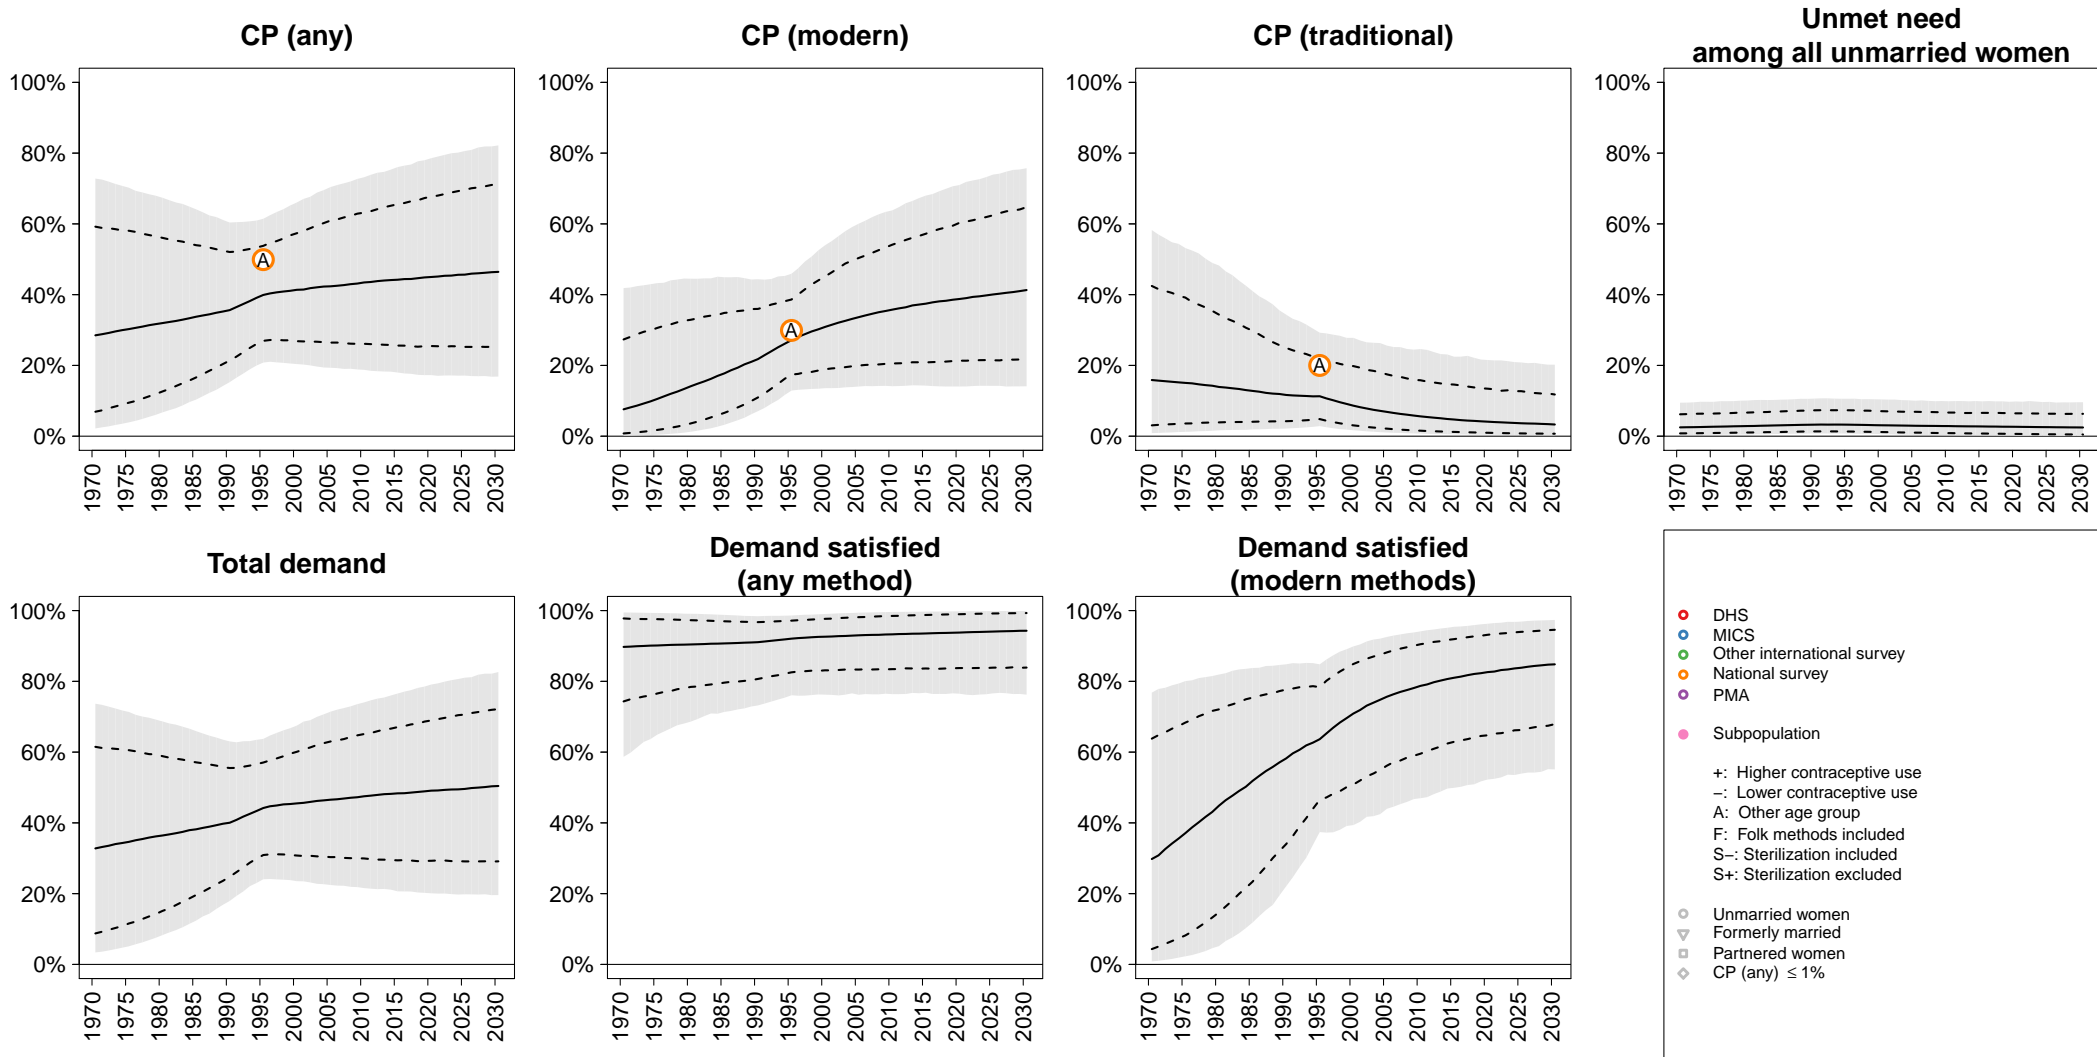

Burkina Faso (Western Africa, SA Group 1) --- Unmarried / Not In-Union

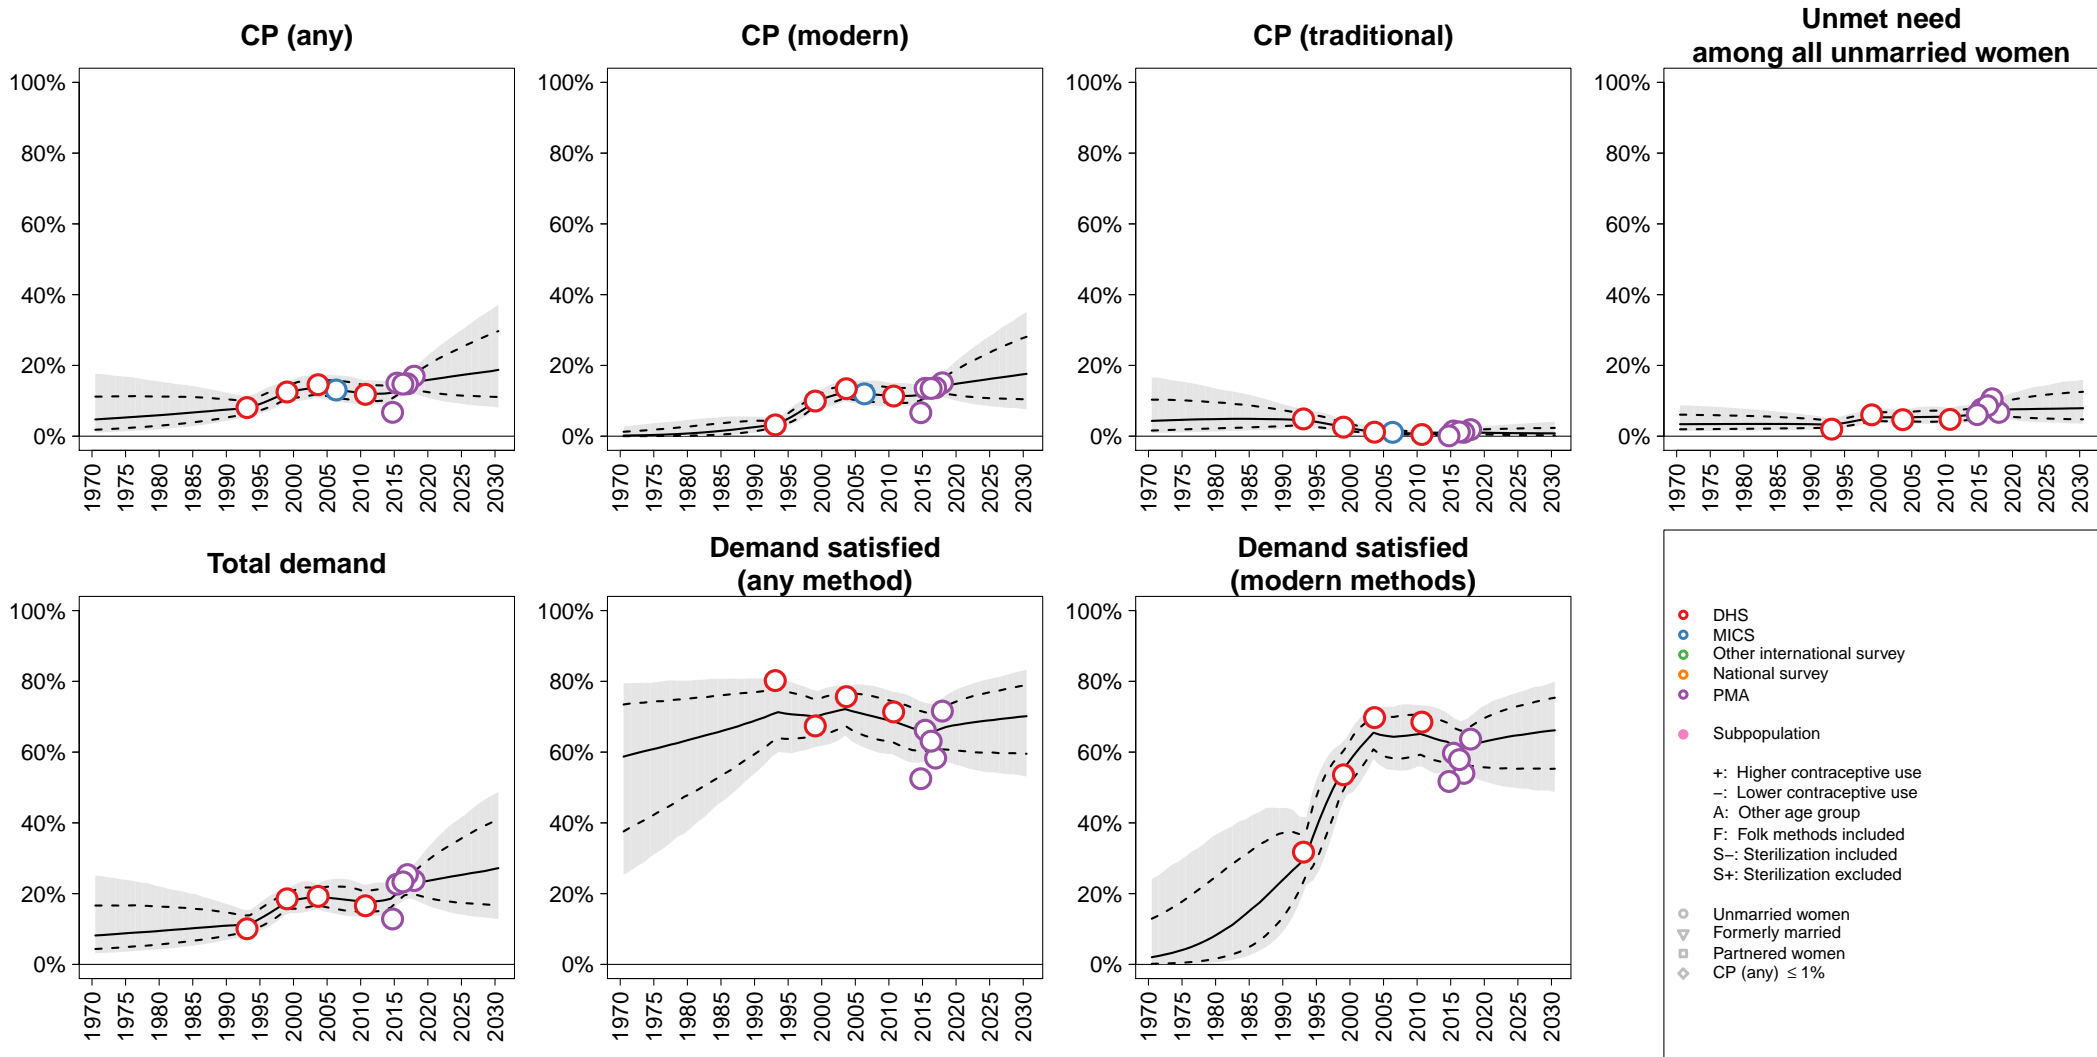

Burundi (Eastern Africa, SA Group 1) --- Unmarried / Not In-Union

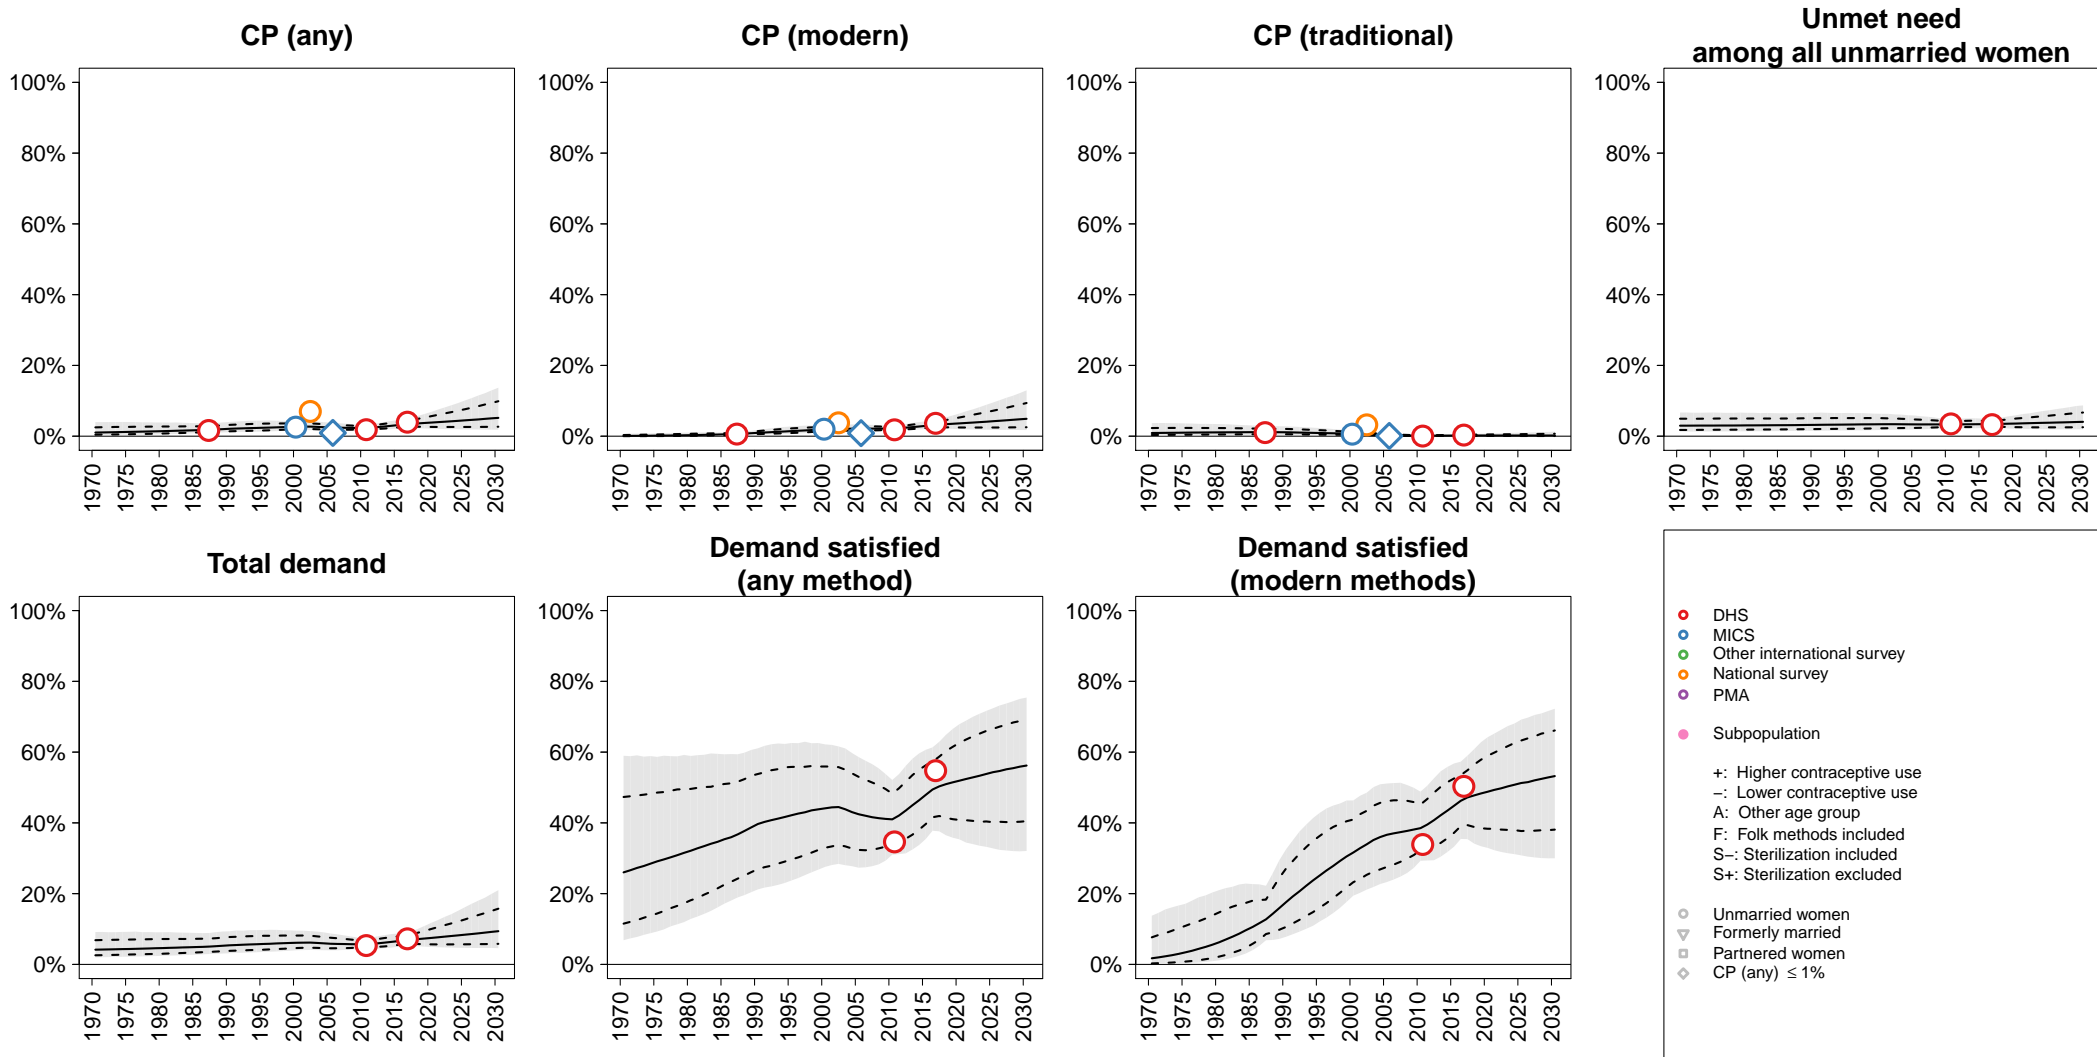

Cabo Verde (Western Africa, SA Group 1) --- Unmarried / Not In-Union

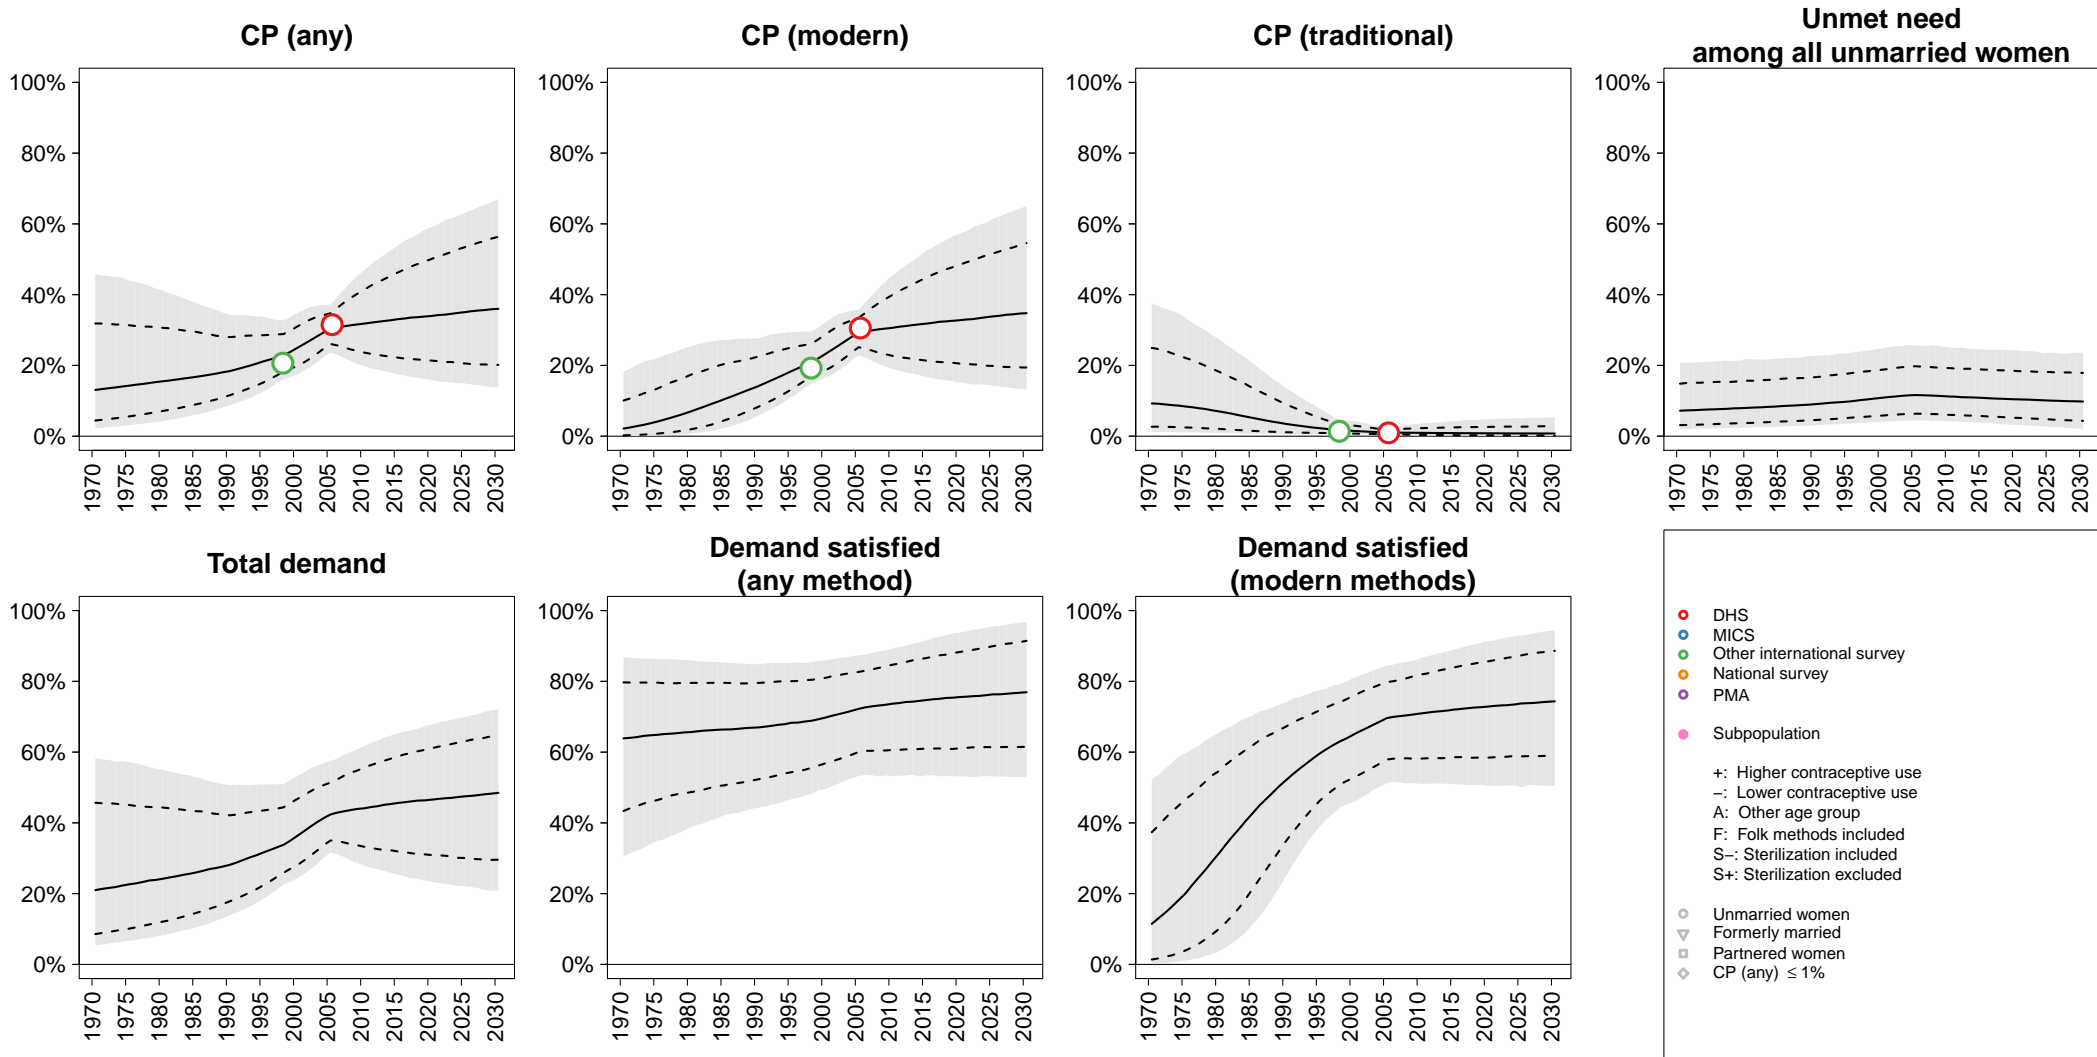

Cambodia (South-eastern Asia, SA Group 0) --- Unmarried / Not In-Union

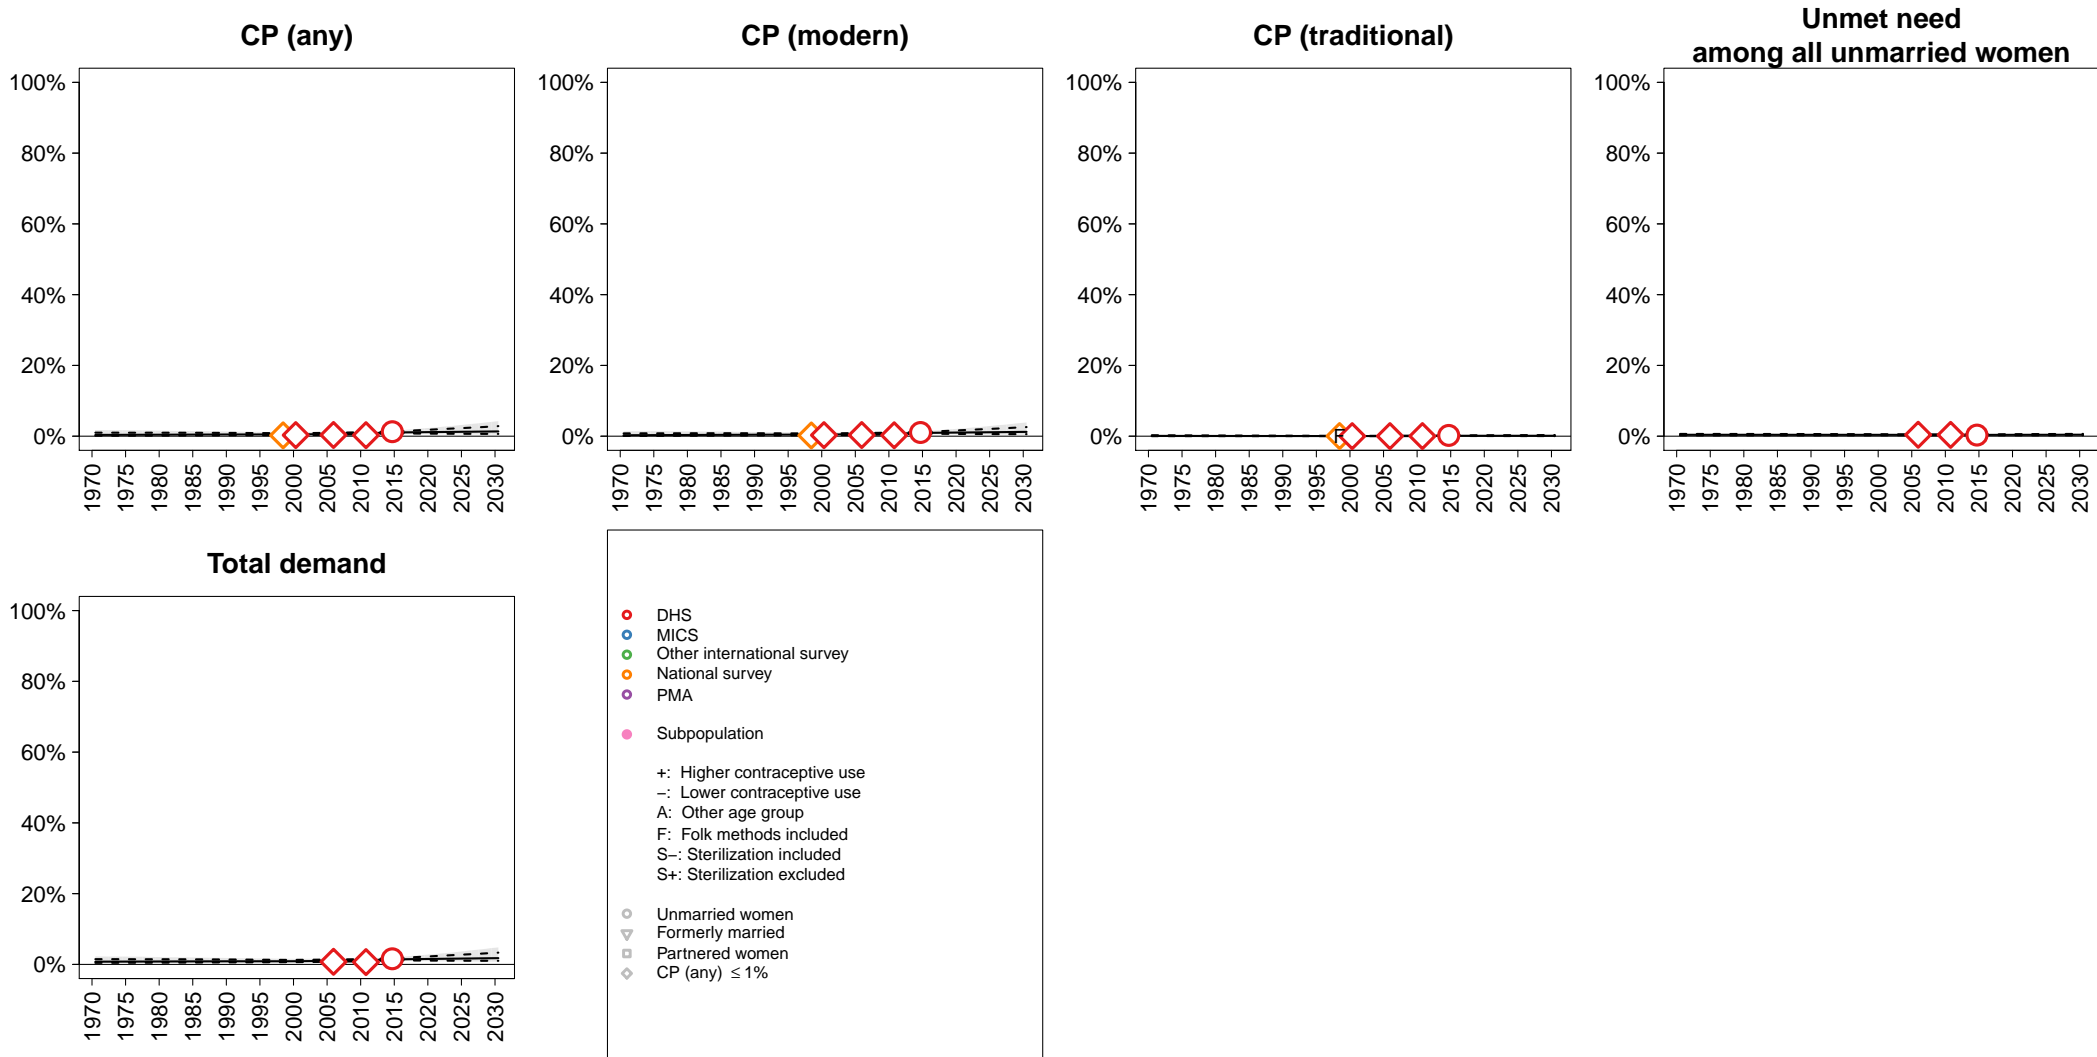



Cameroon (Middle Africa, SA Group 1) --- Unmarried / Not In-Union

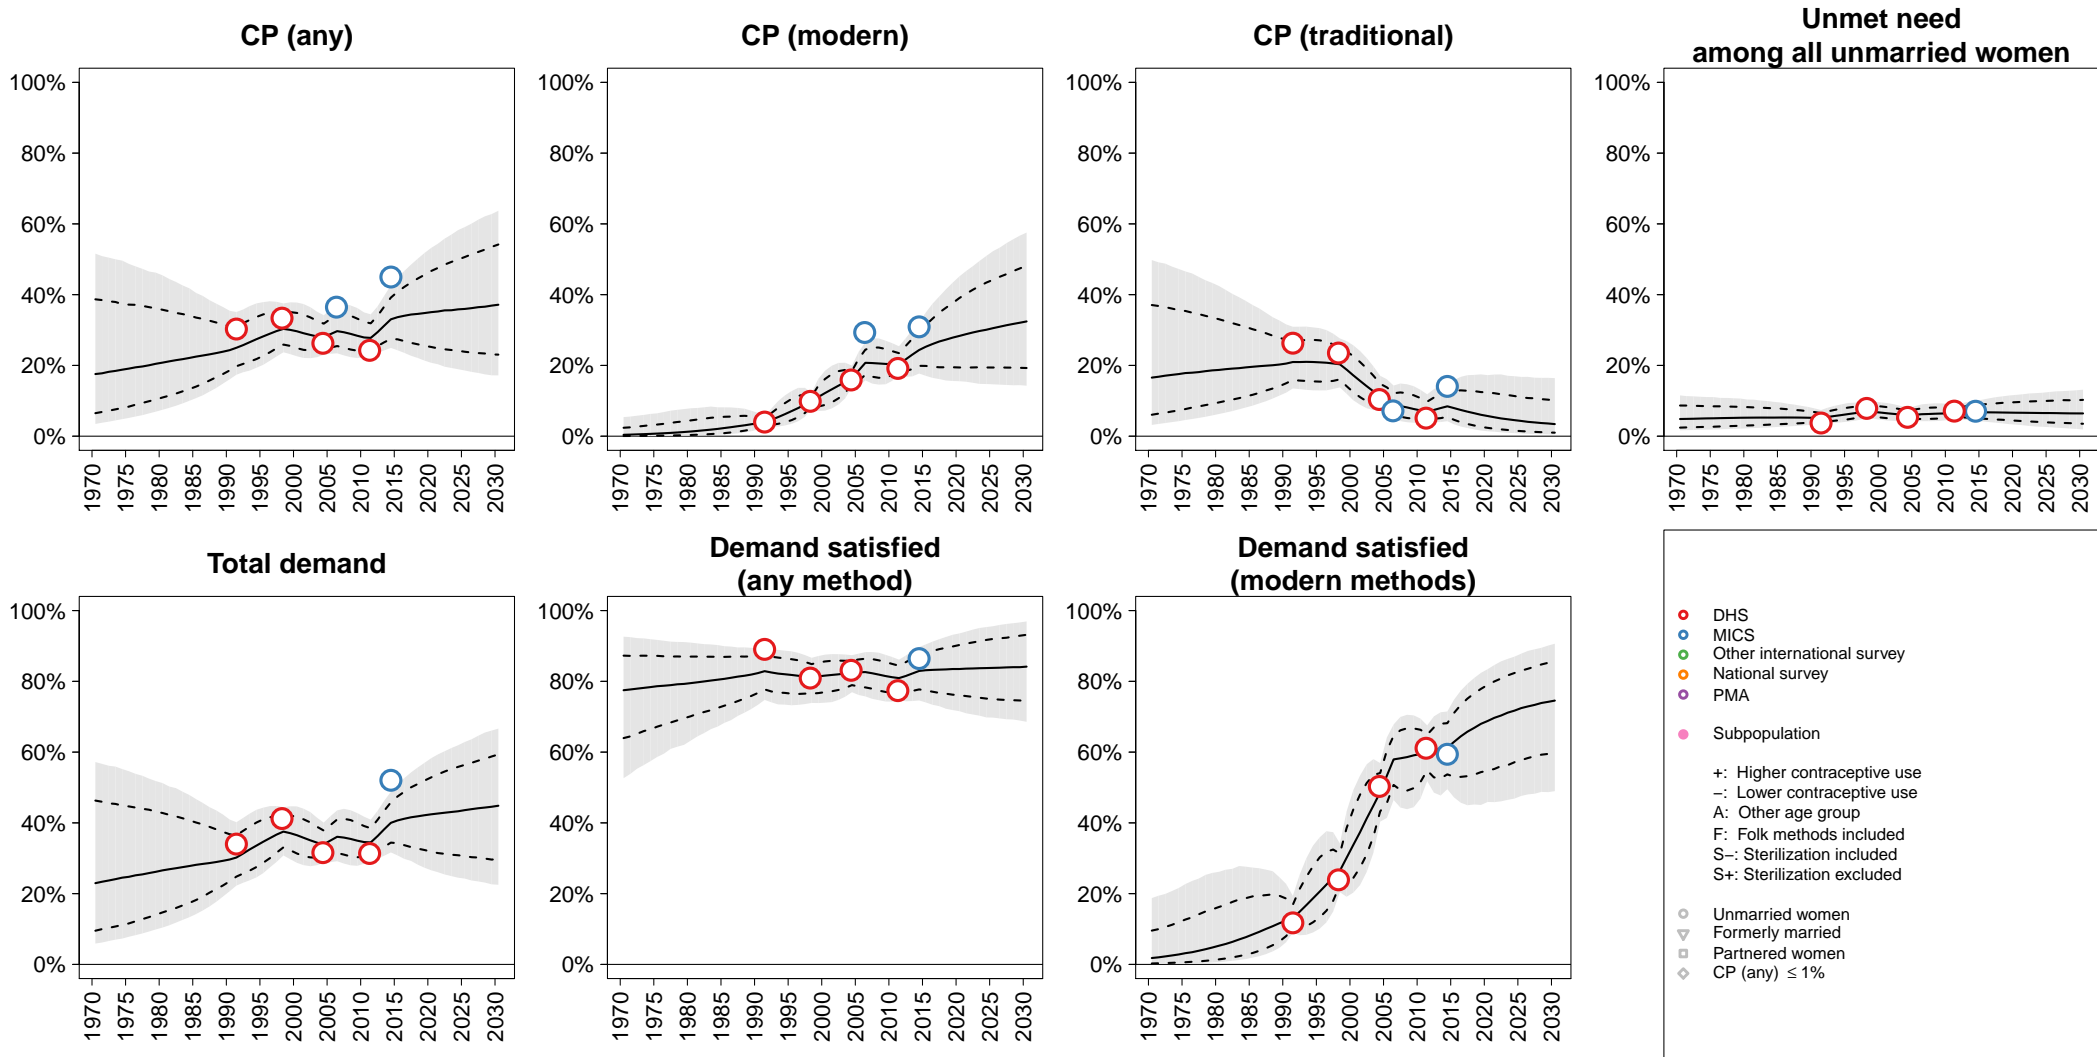

Canada (Northern America, SA Group 1) --- Unmarried / Not In-Union

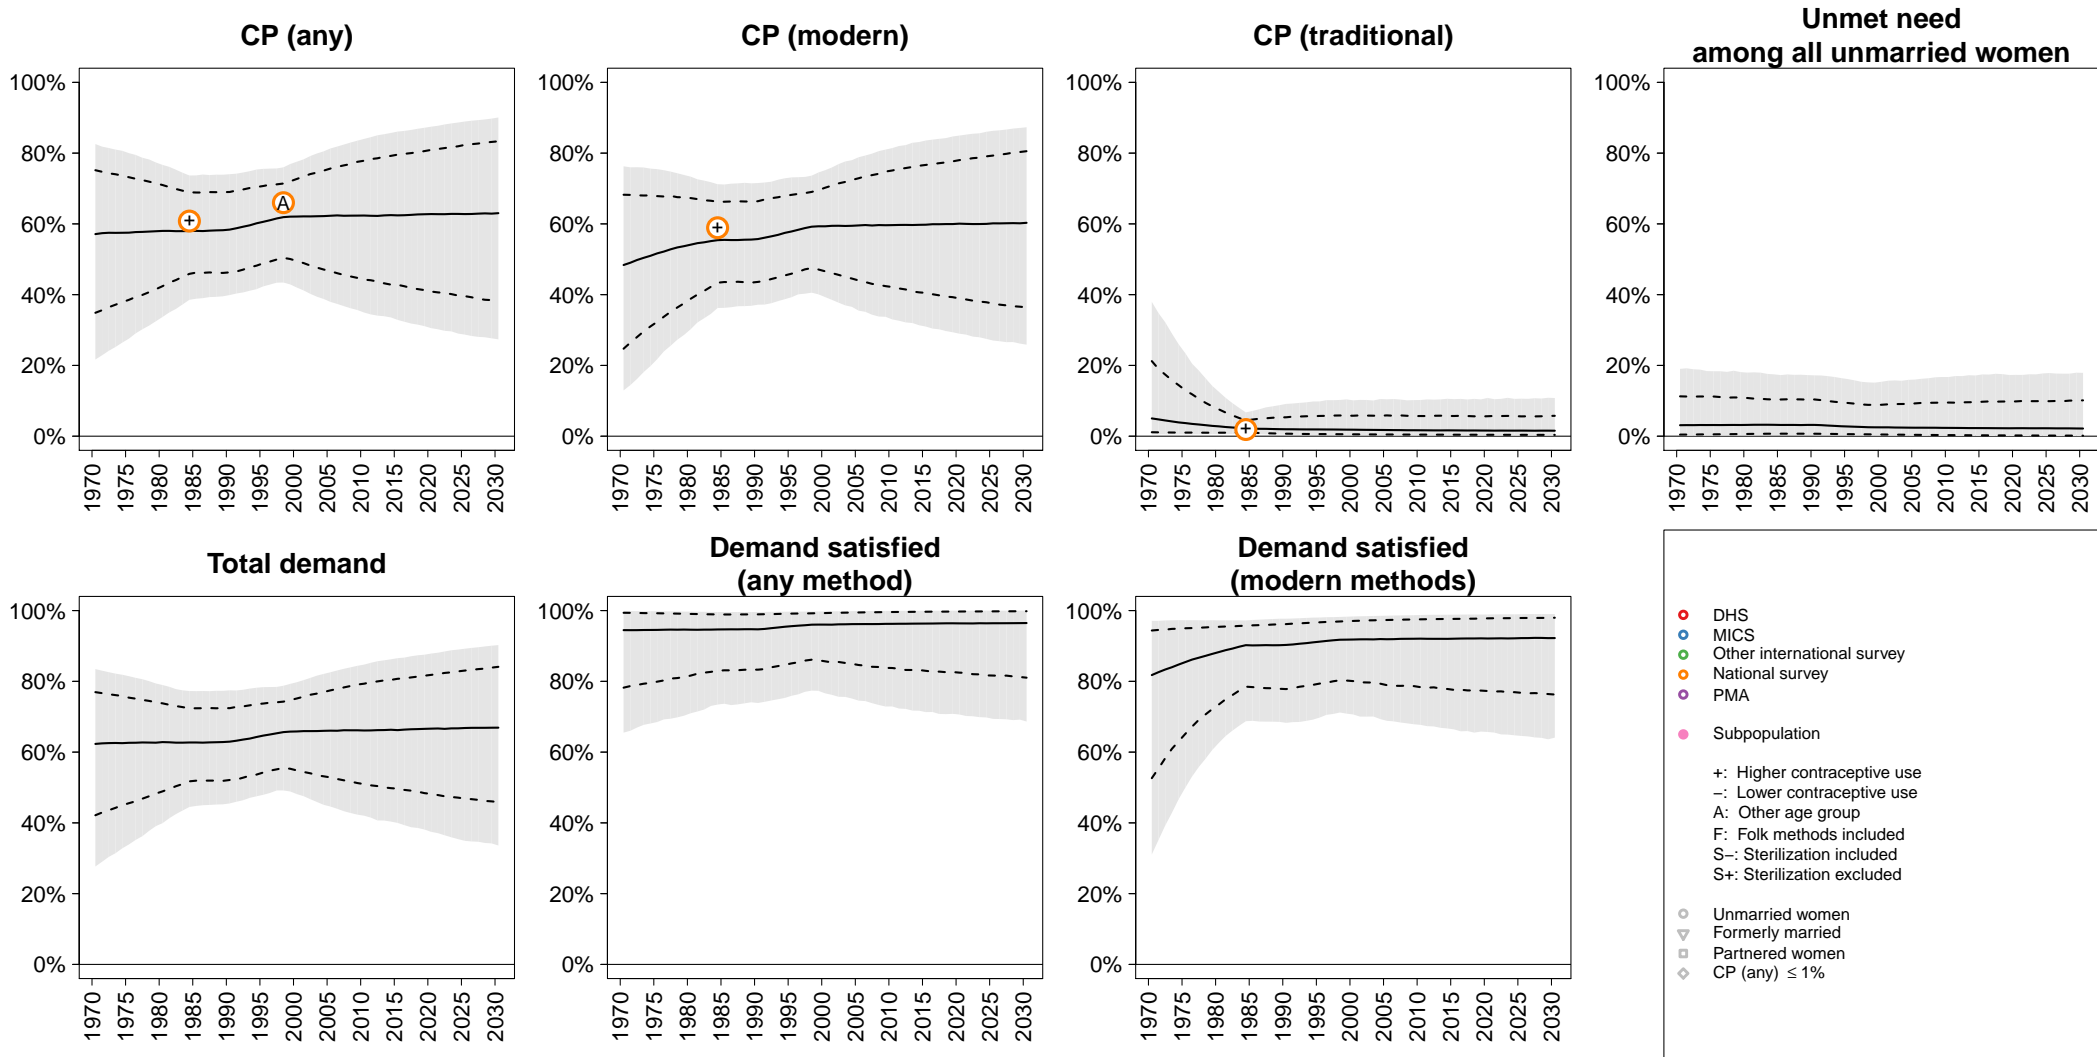

Central African Republic (Middle Africa, SA Group 1) --- Unmarried / Not In-Union

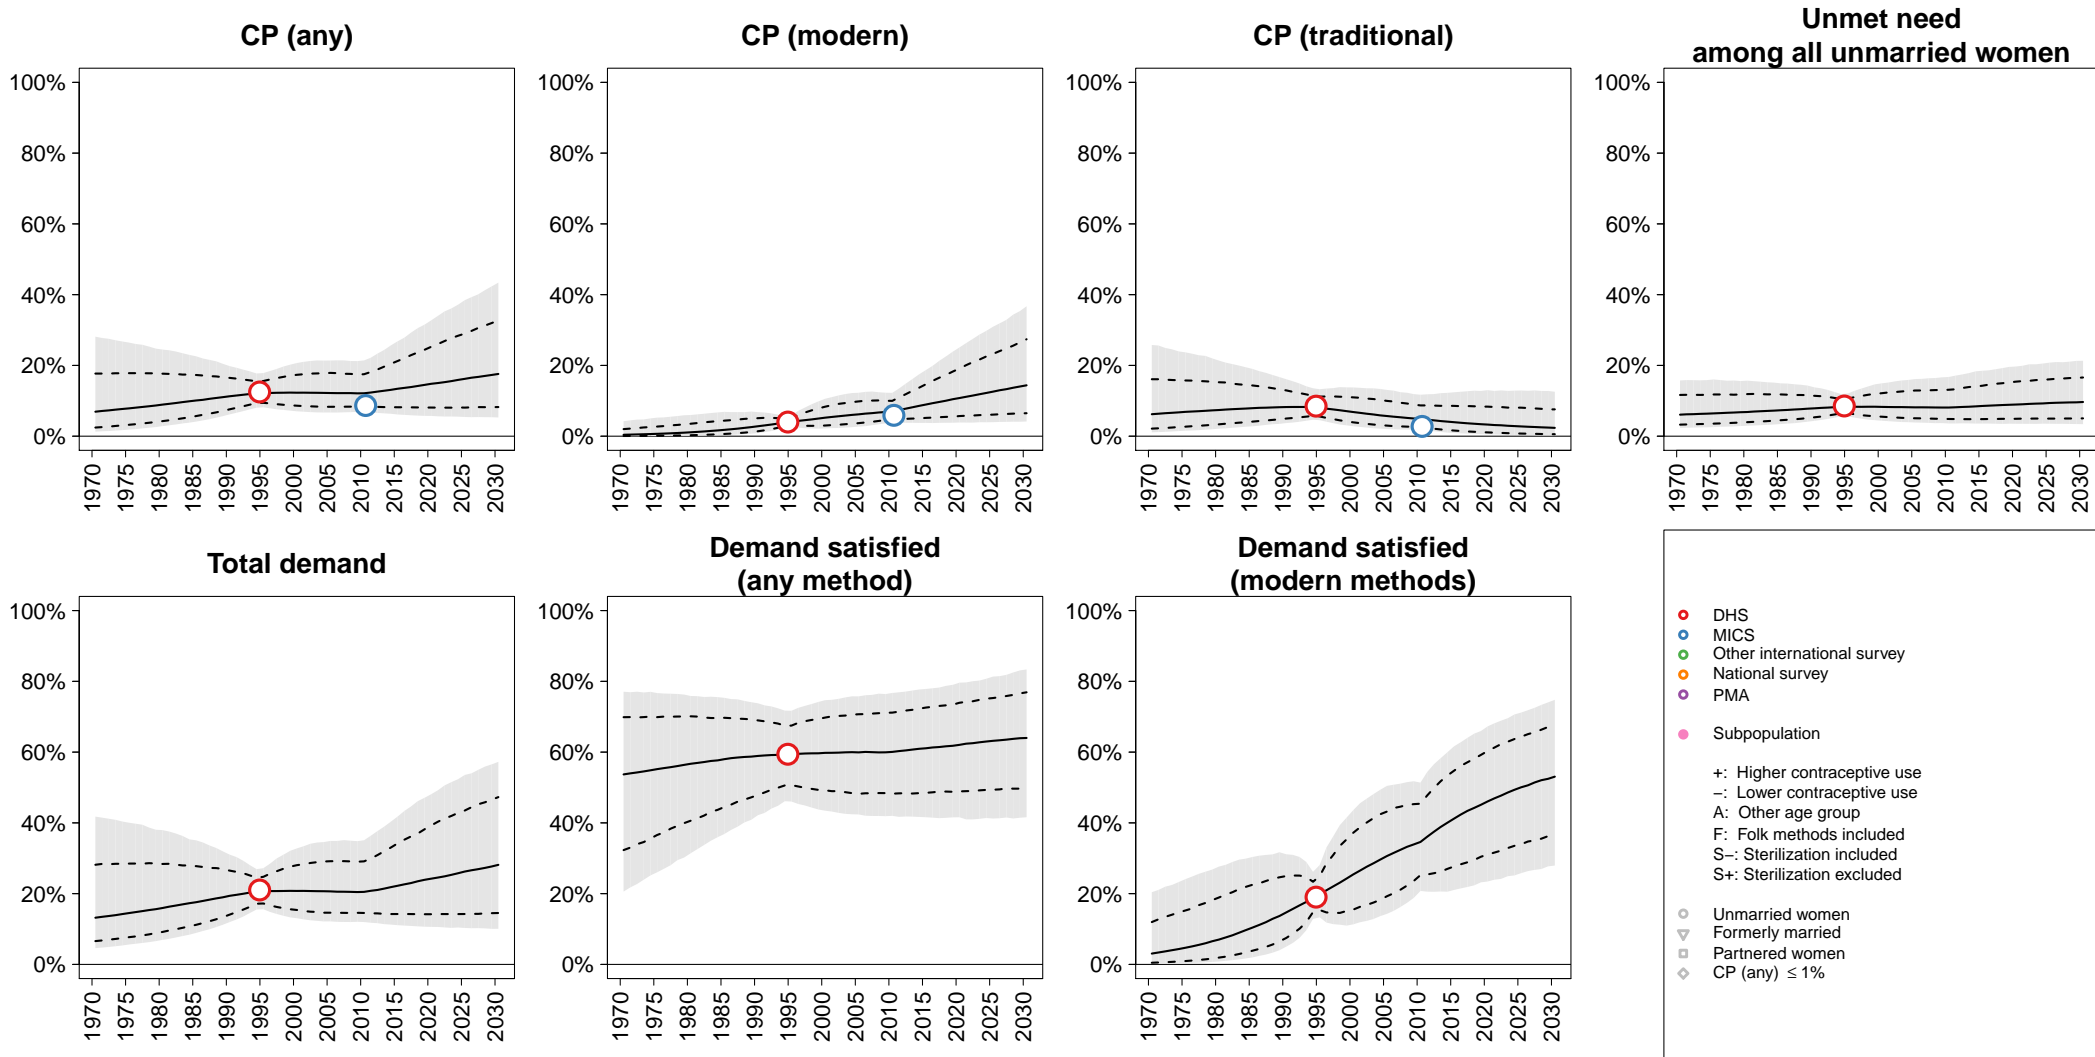

Chad (Middle Africa, SA Group 1) --- Unmarried / Not In-Union

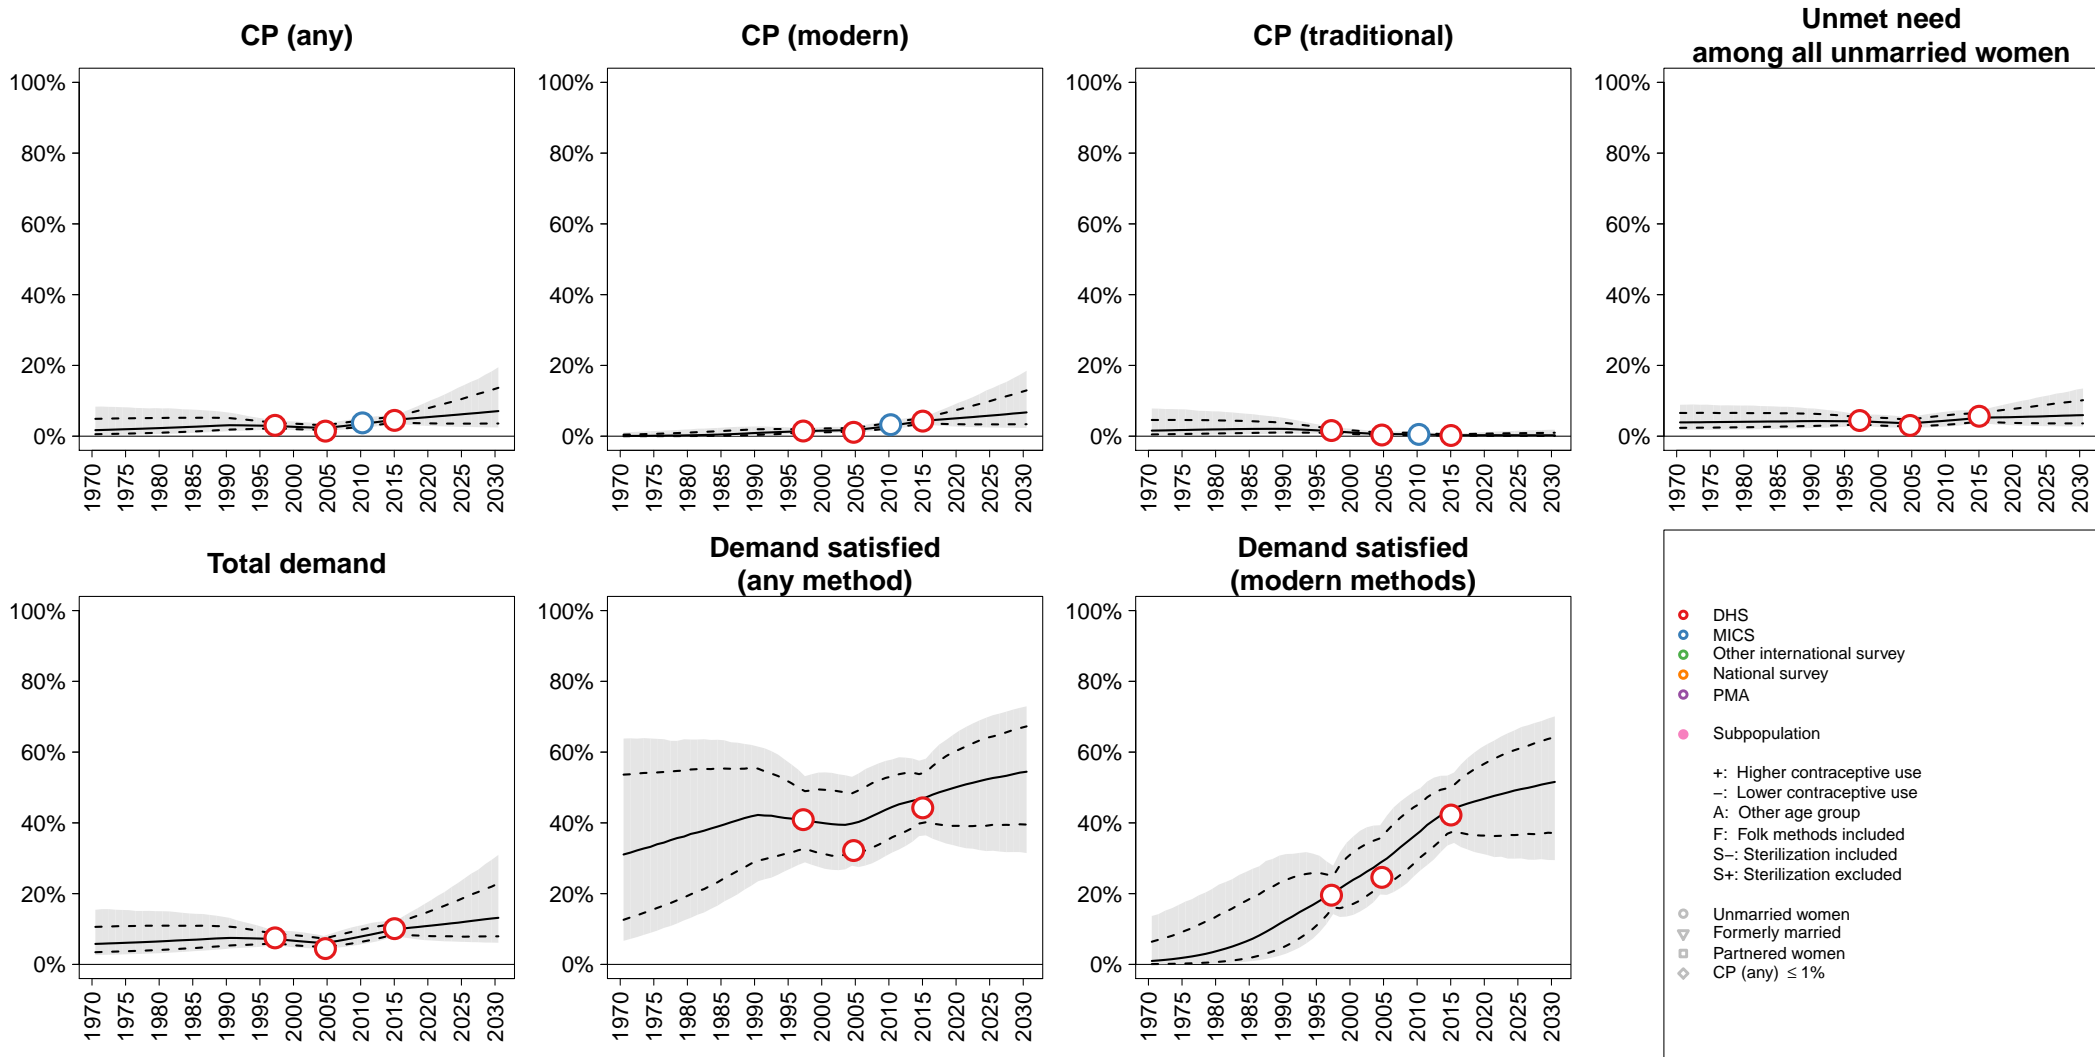

Chile (South America, SA Group 1) --- Unmarried / Not In-Union

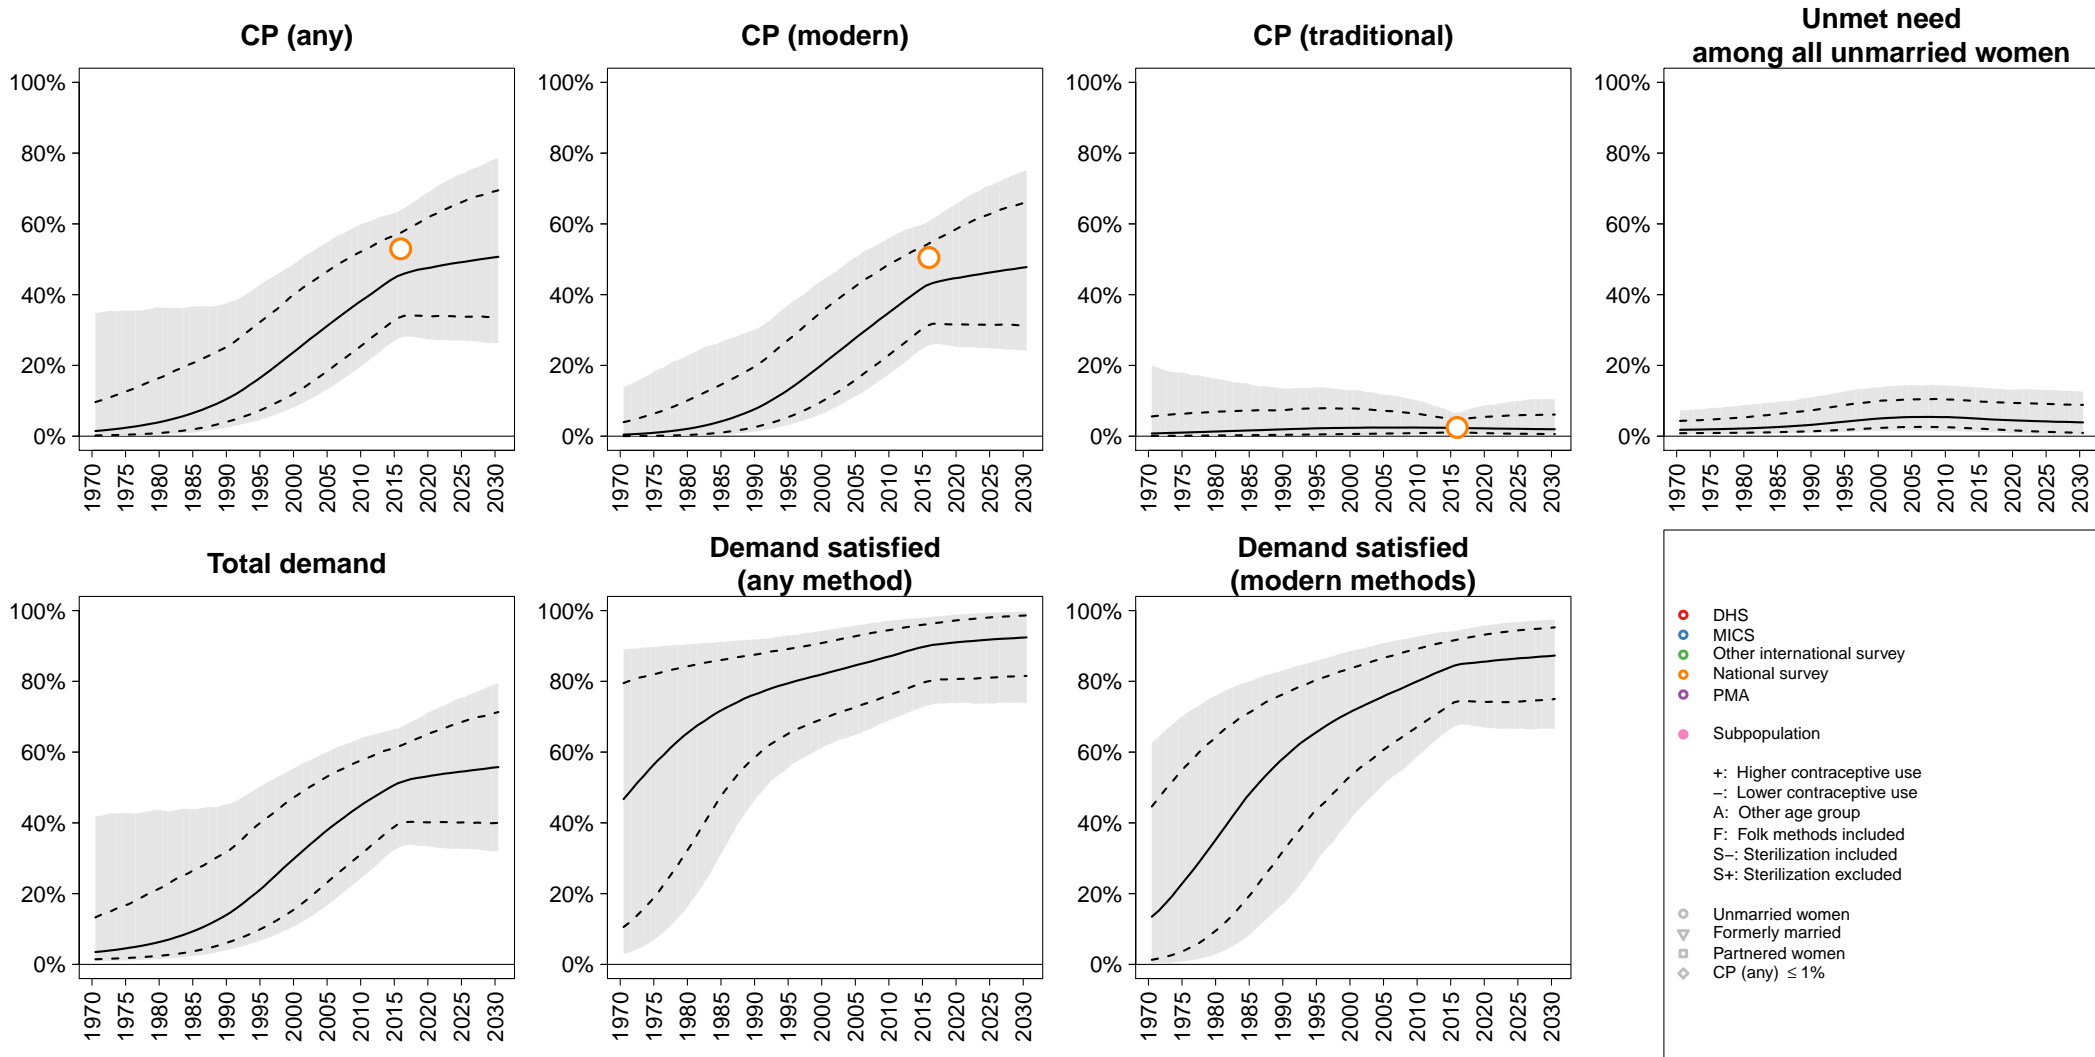

China (Eastern Asia, SA Group 1) --- Unmarried / Not In-Union

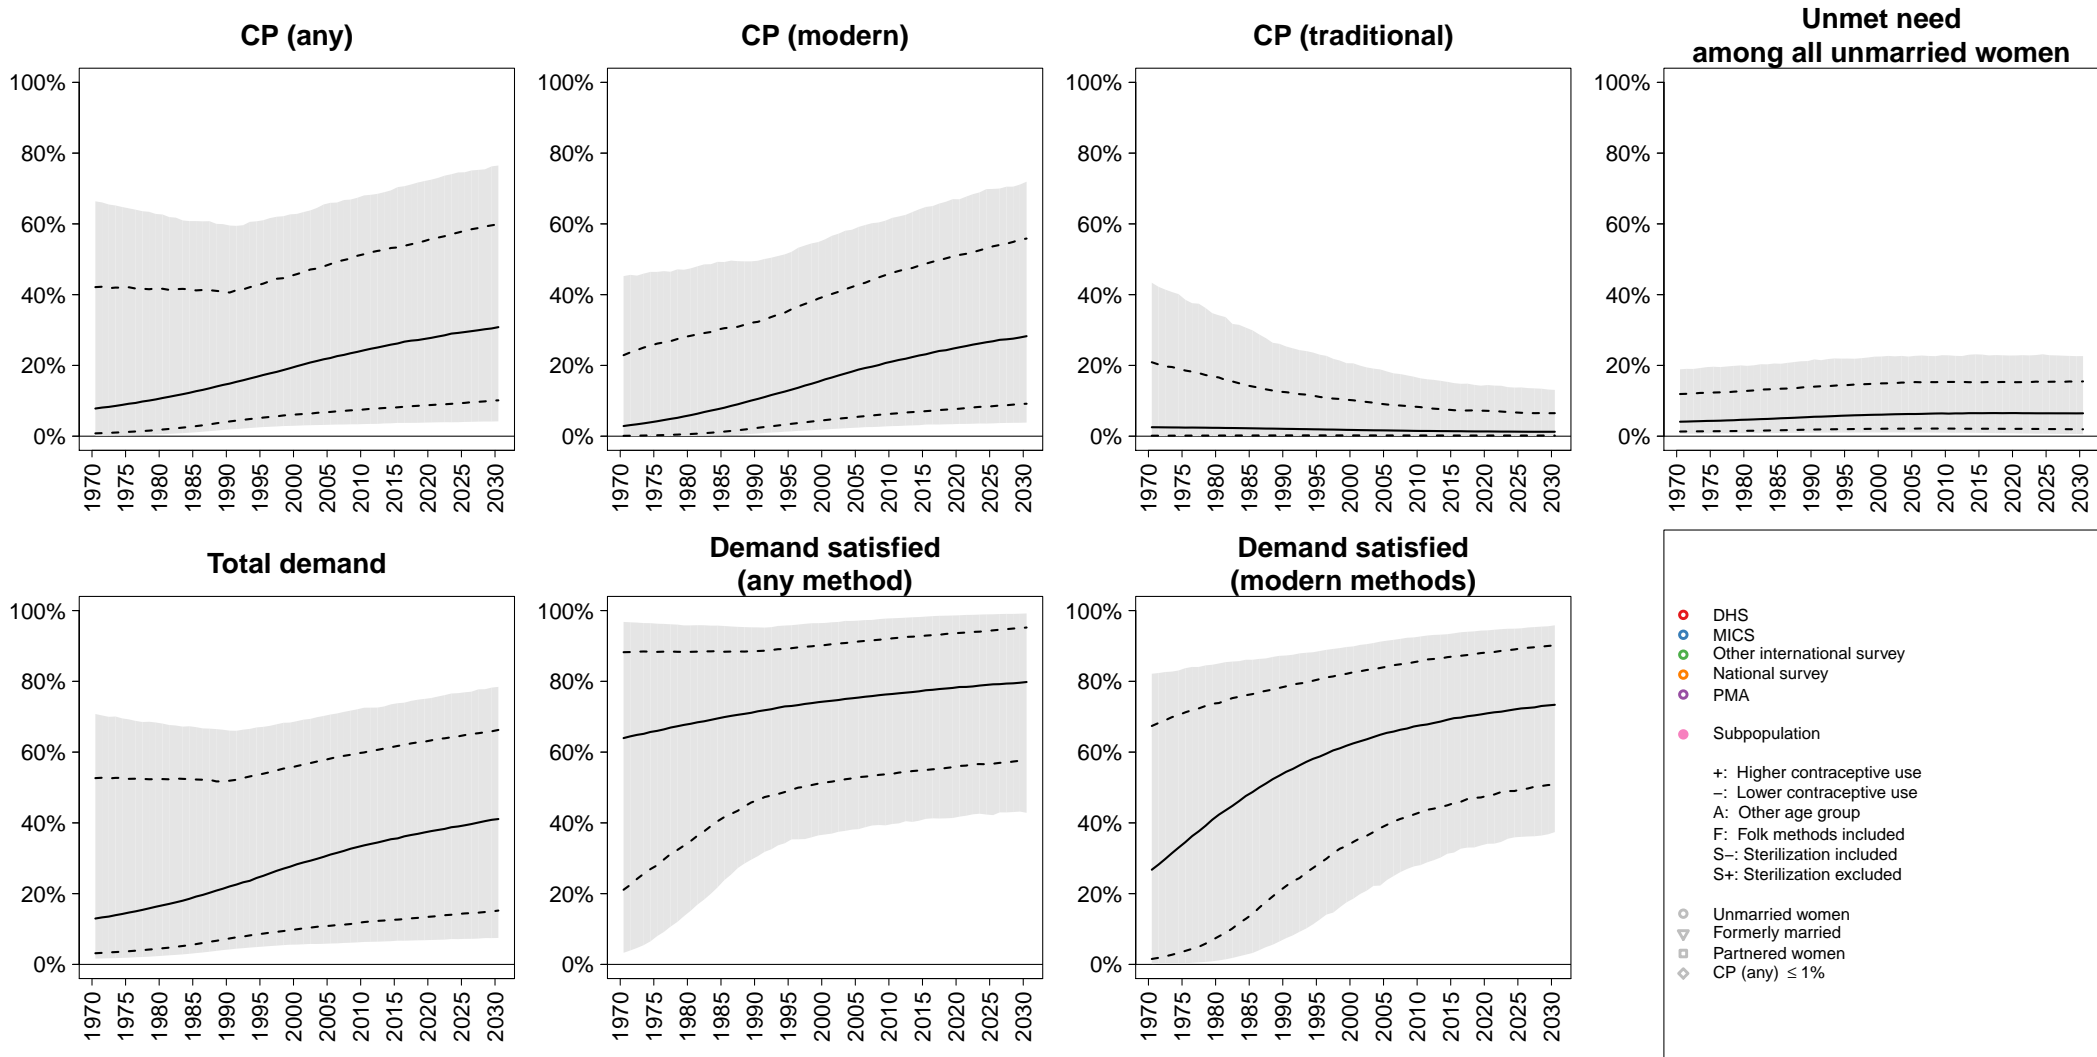

China, Hong Kong SAR (Eastern Asia, SA Group 1) --- Unmarried / Not In-Union

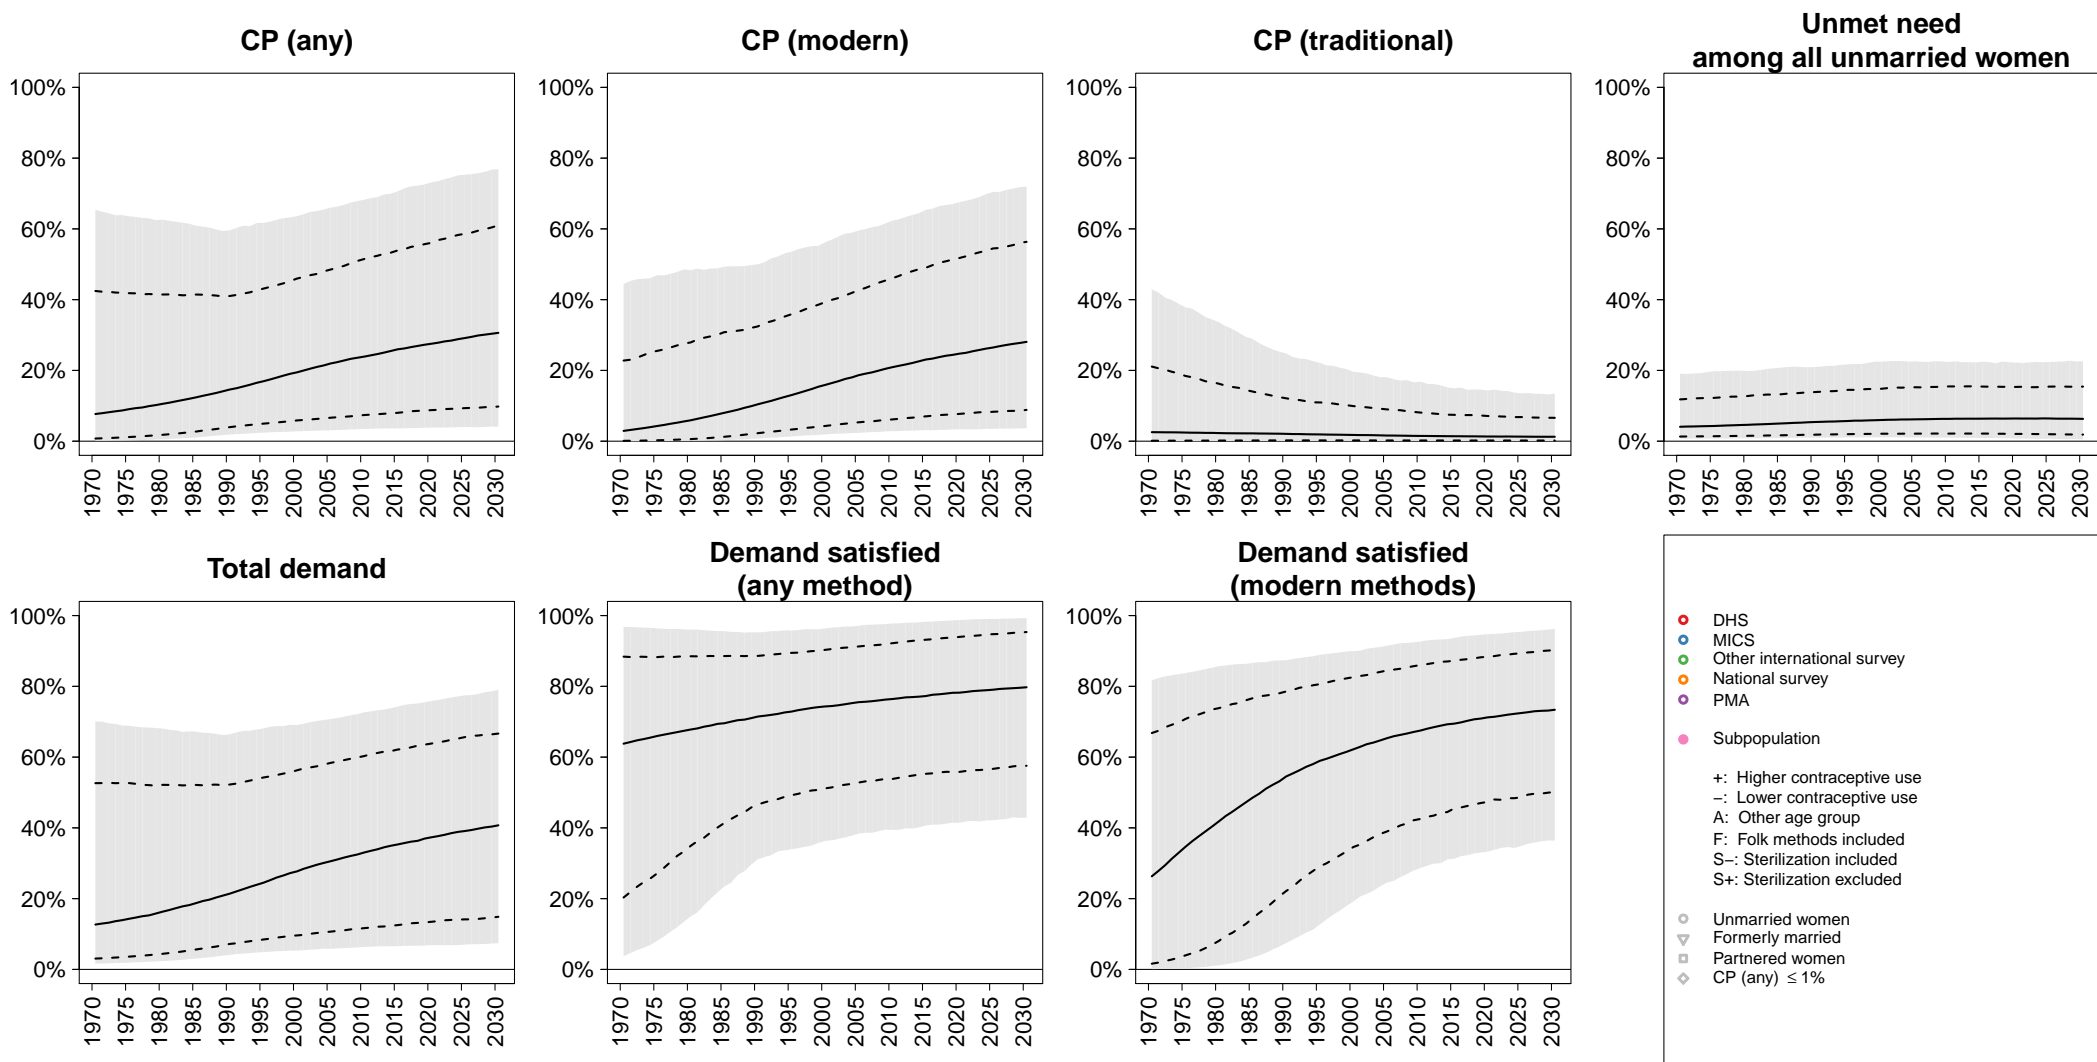

Colombia (South America, SA Group 1) --- Unmarried / Not In-Union

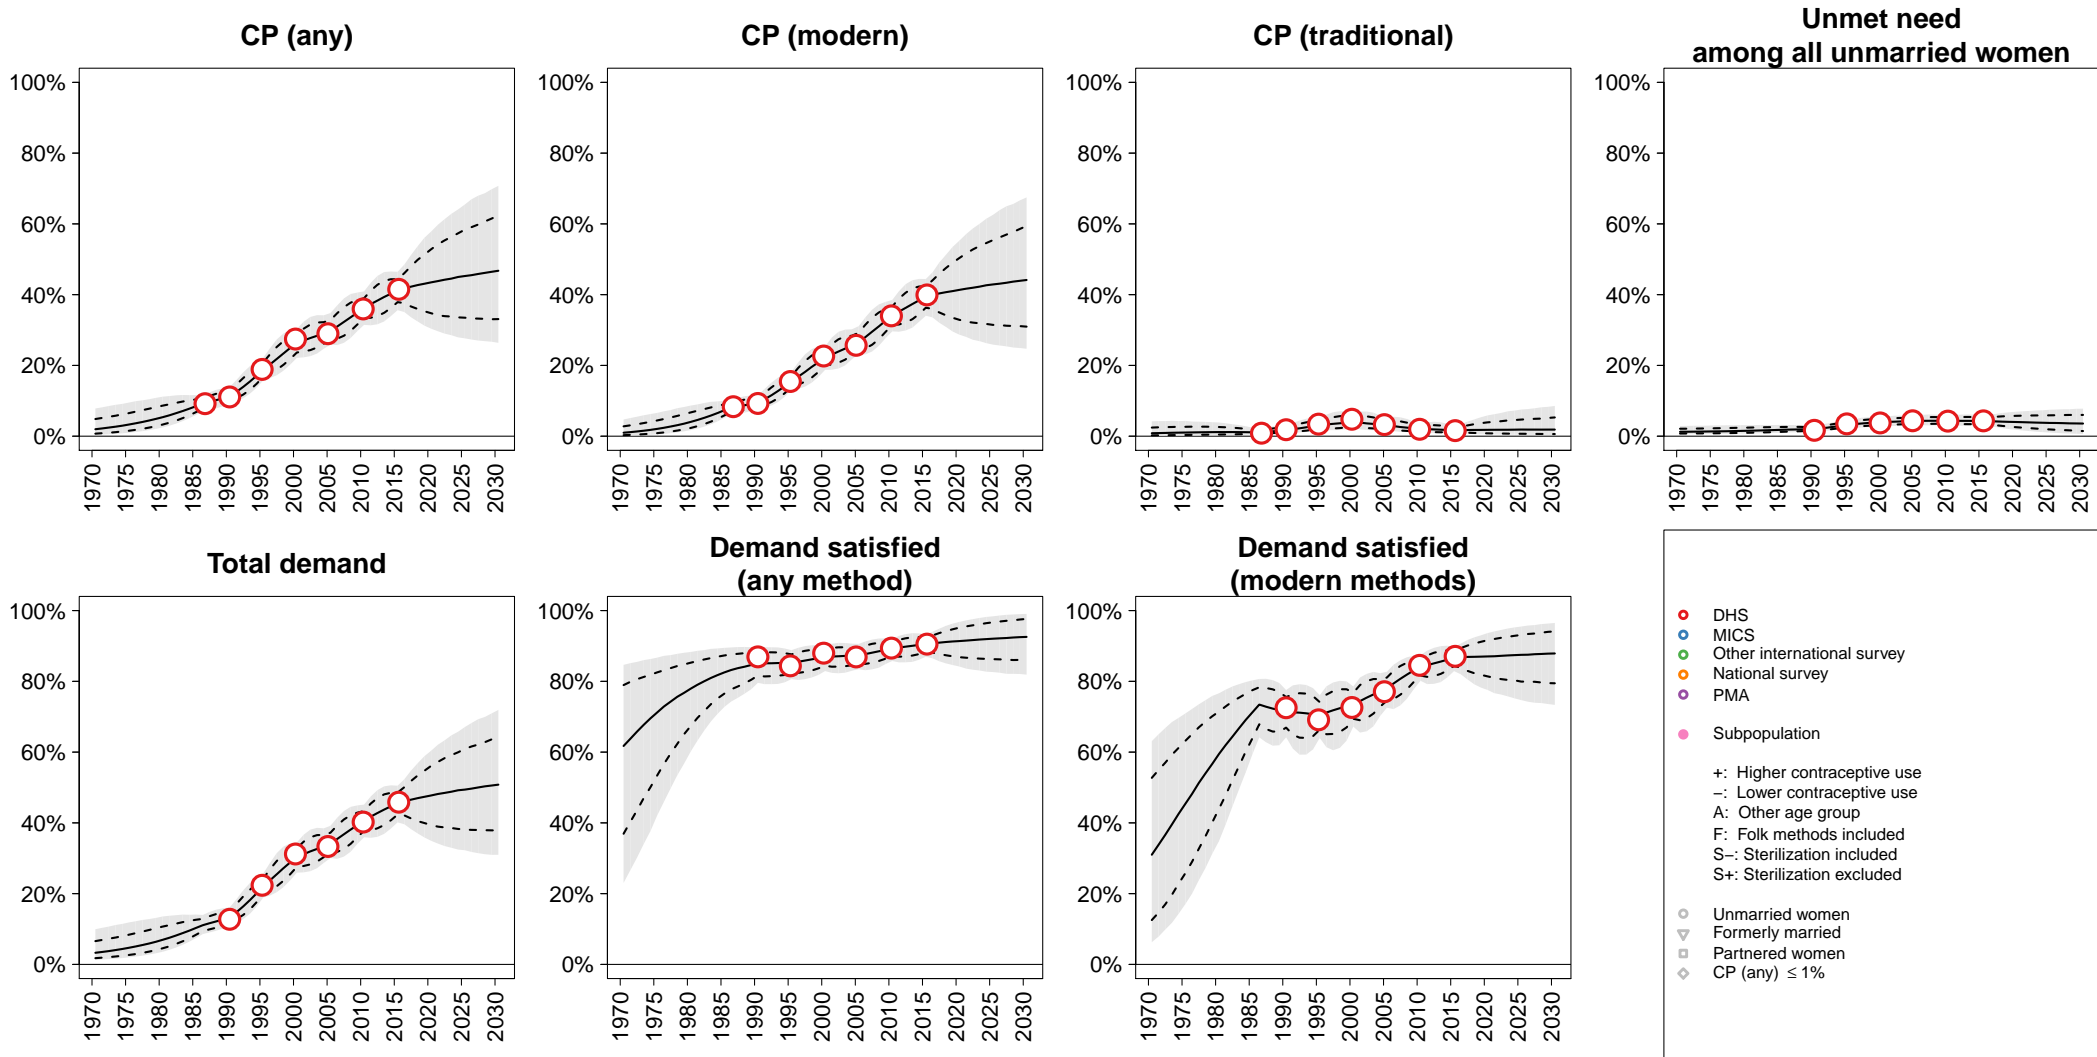



Comoros (Eastern Africa, SA Group 1) --- Unmarried / Not In-Union

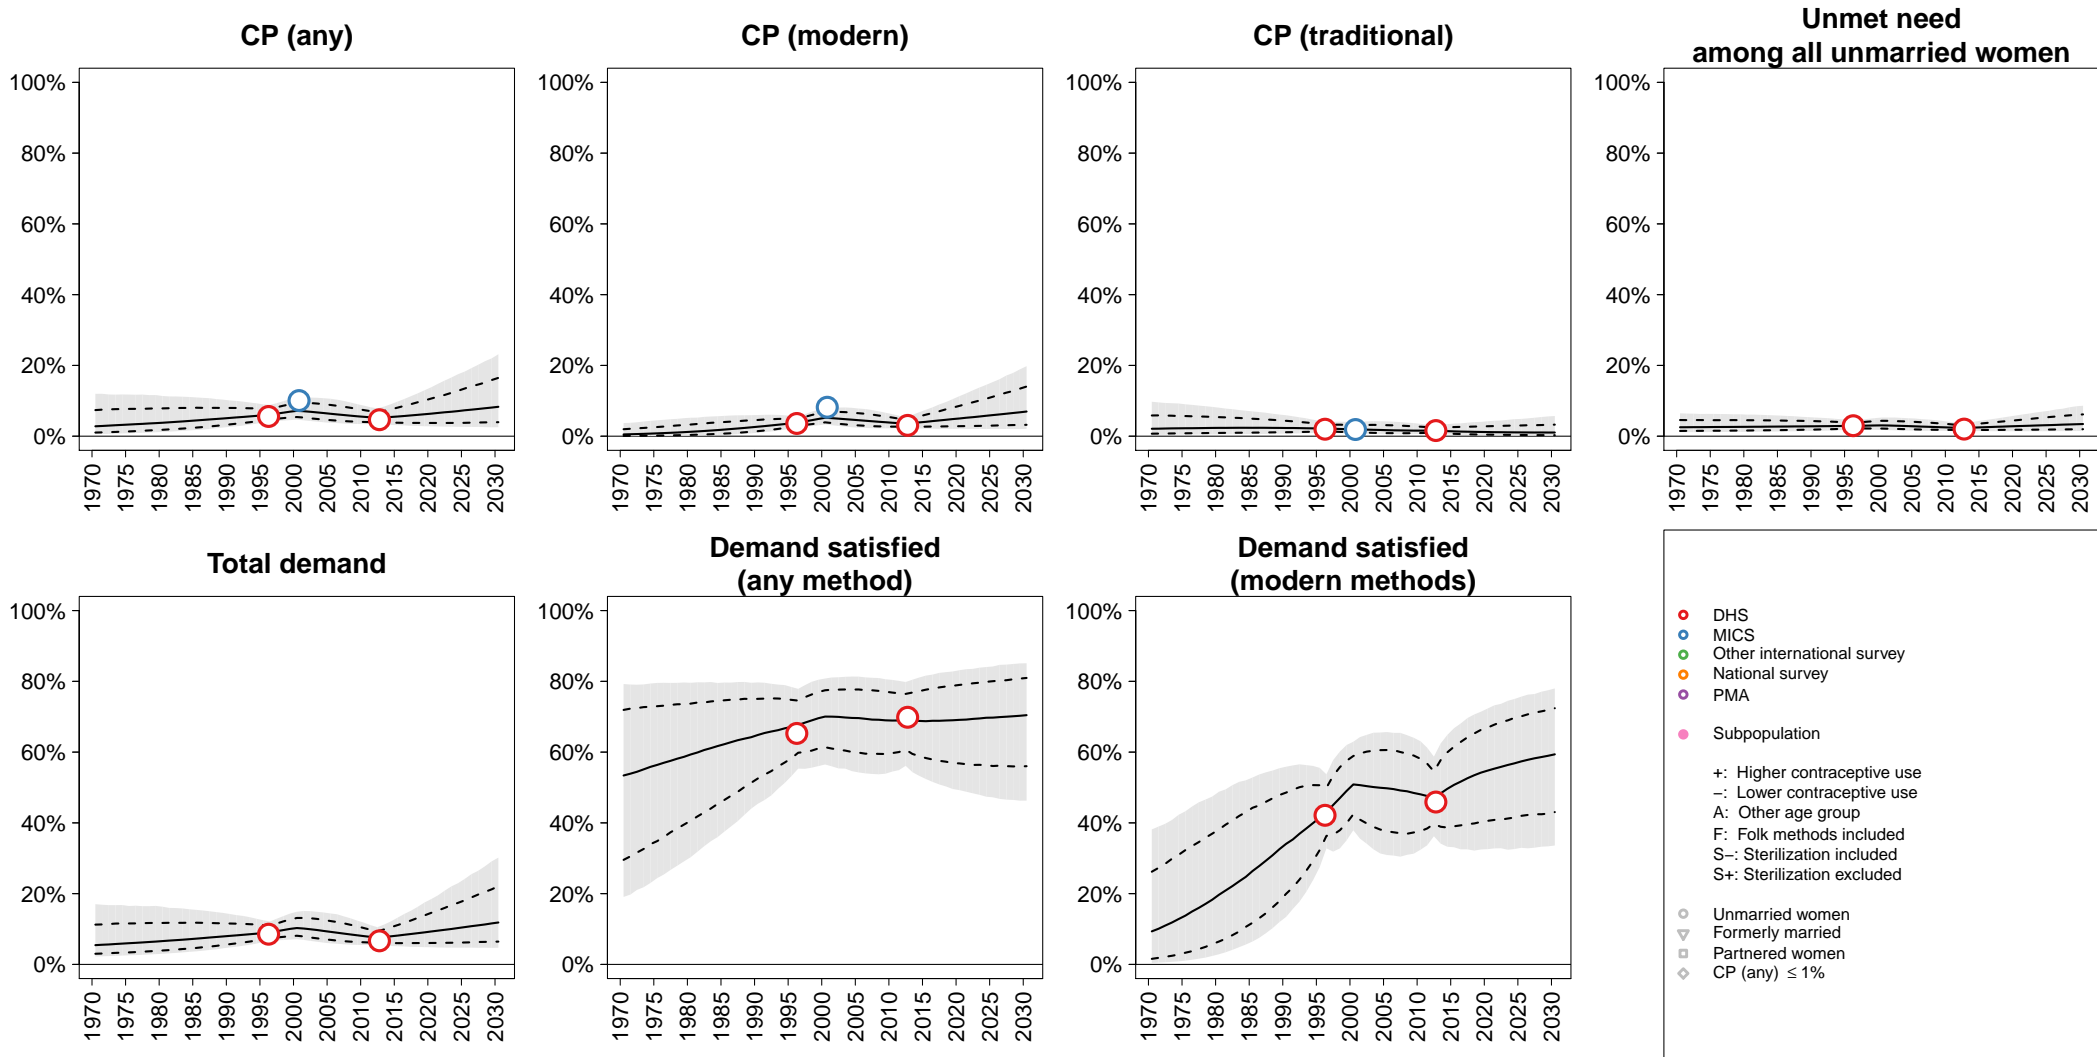

Congo (Middle Africa, SA Group 1) --- Unmarried / Not In-Union

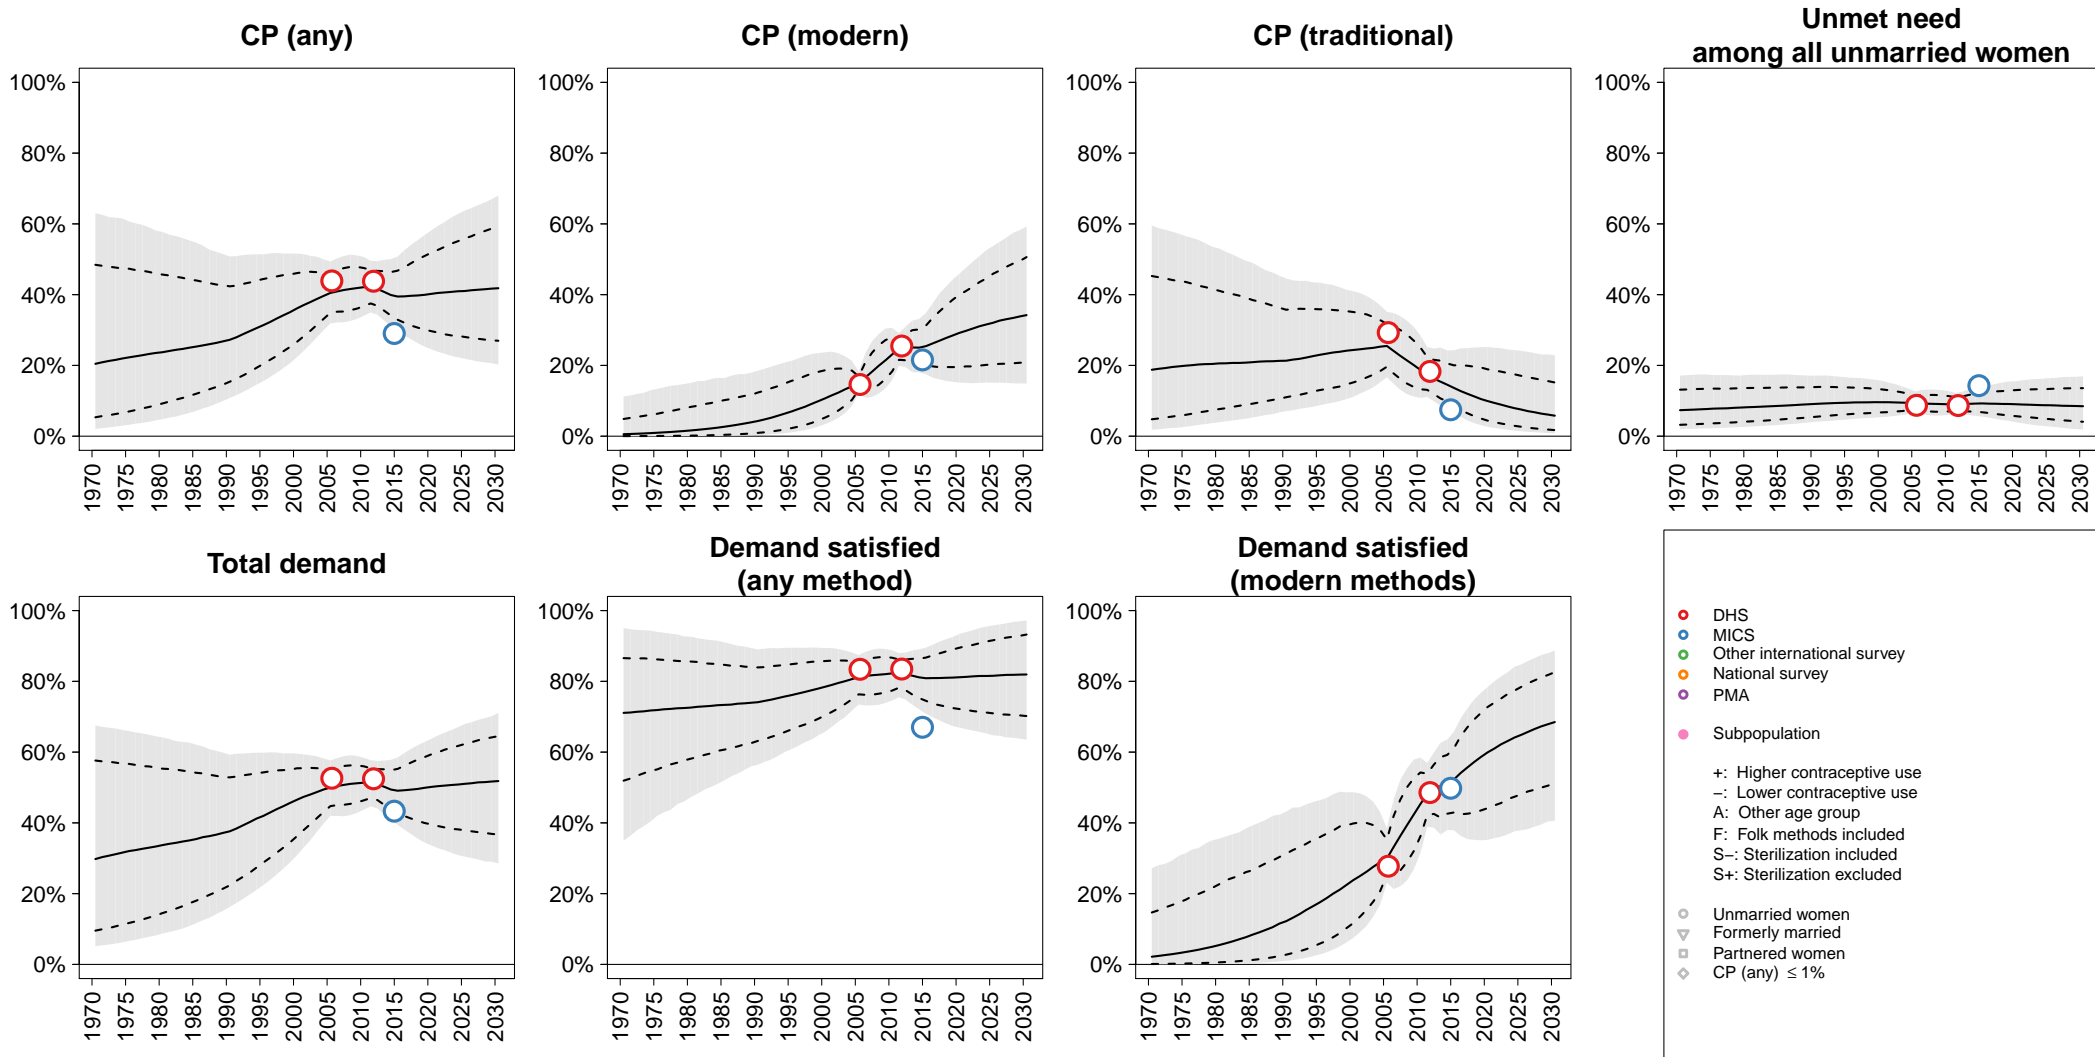

Costa Rica (Central America, SA Group 1) --- Unmarried / Not In-Union

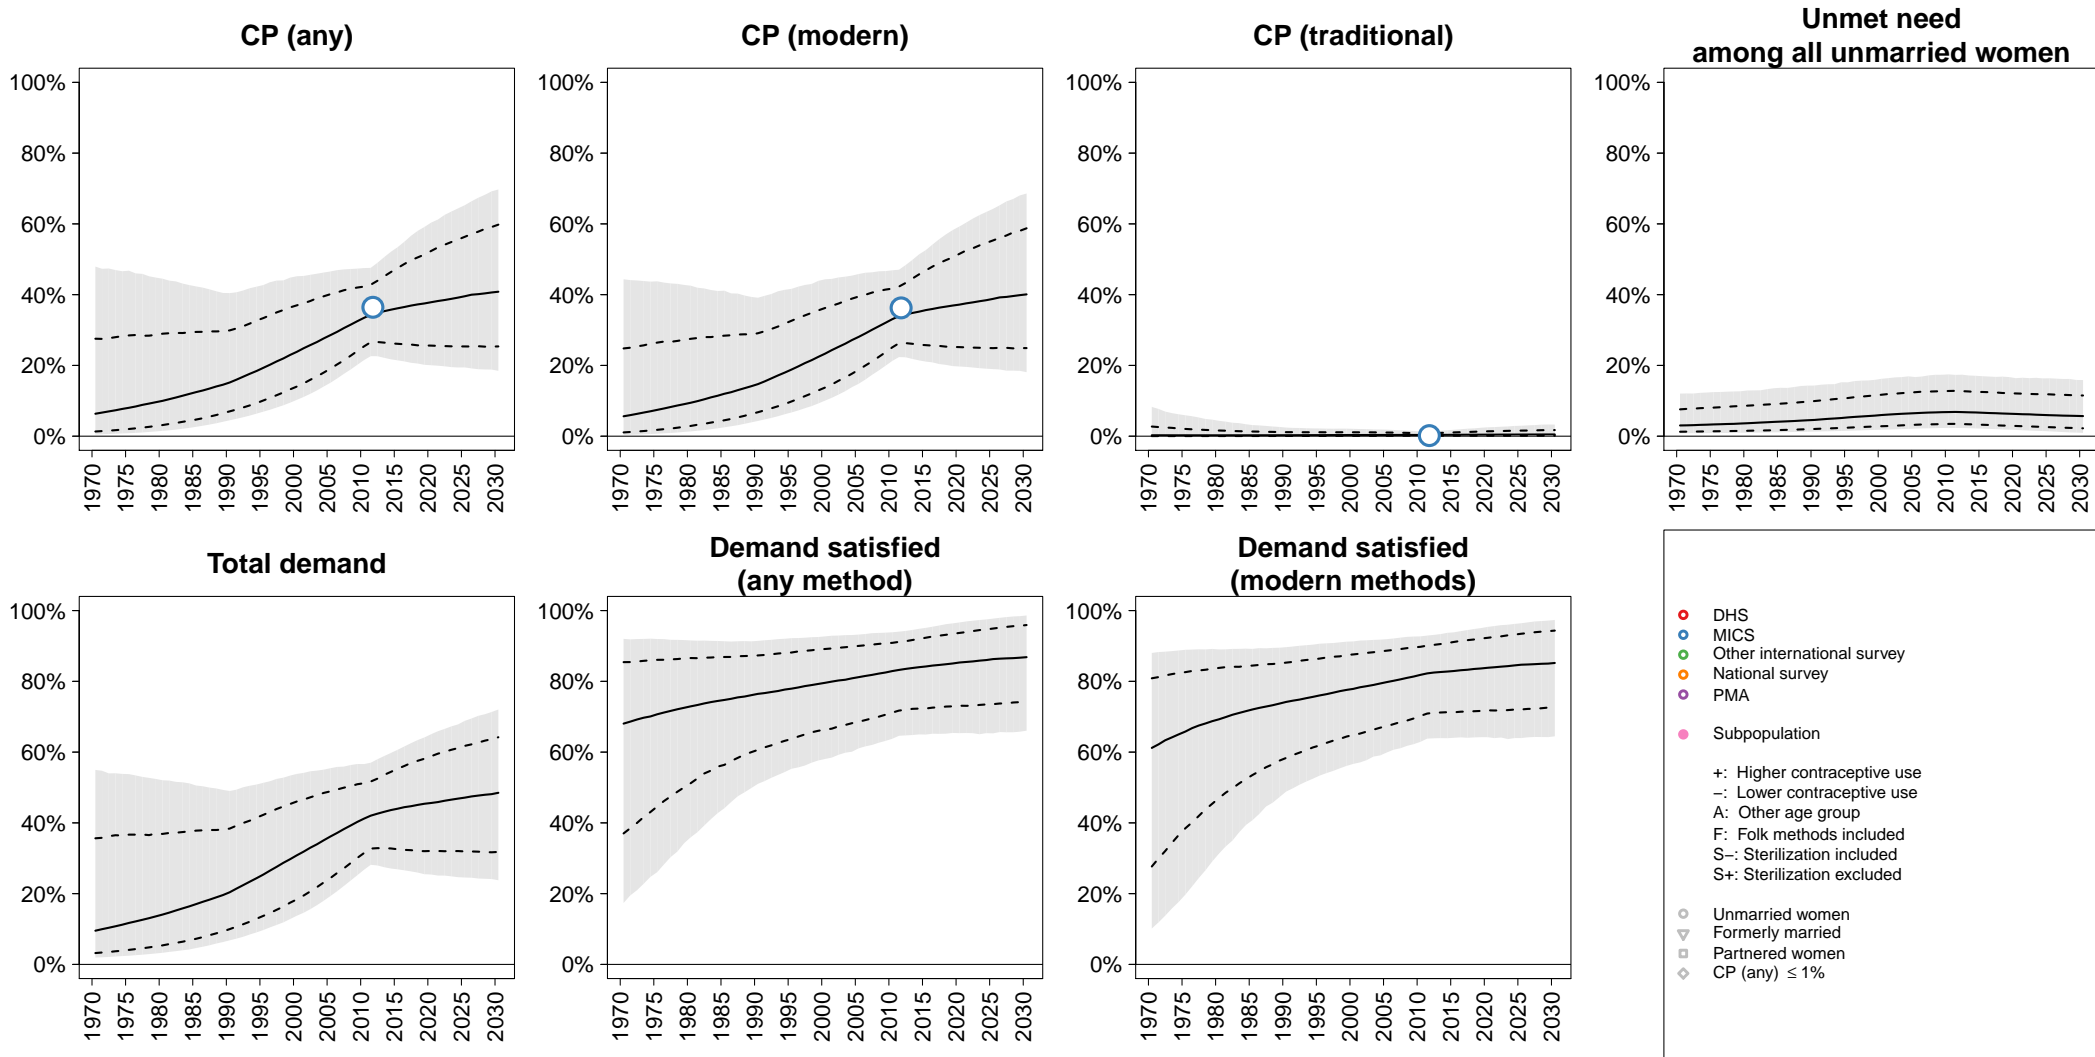

Côte d'Ivoire (Western Africa, SA Group 1) --- Unmarried / Not In-Union

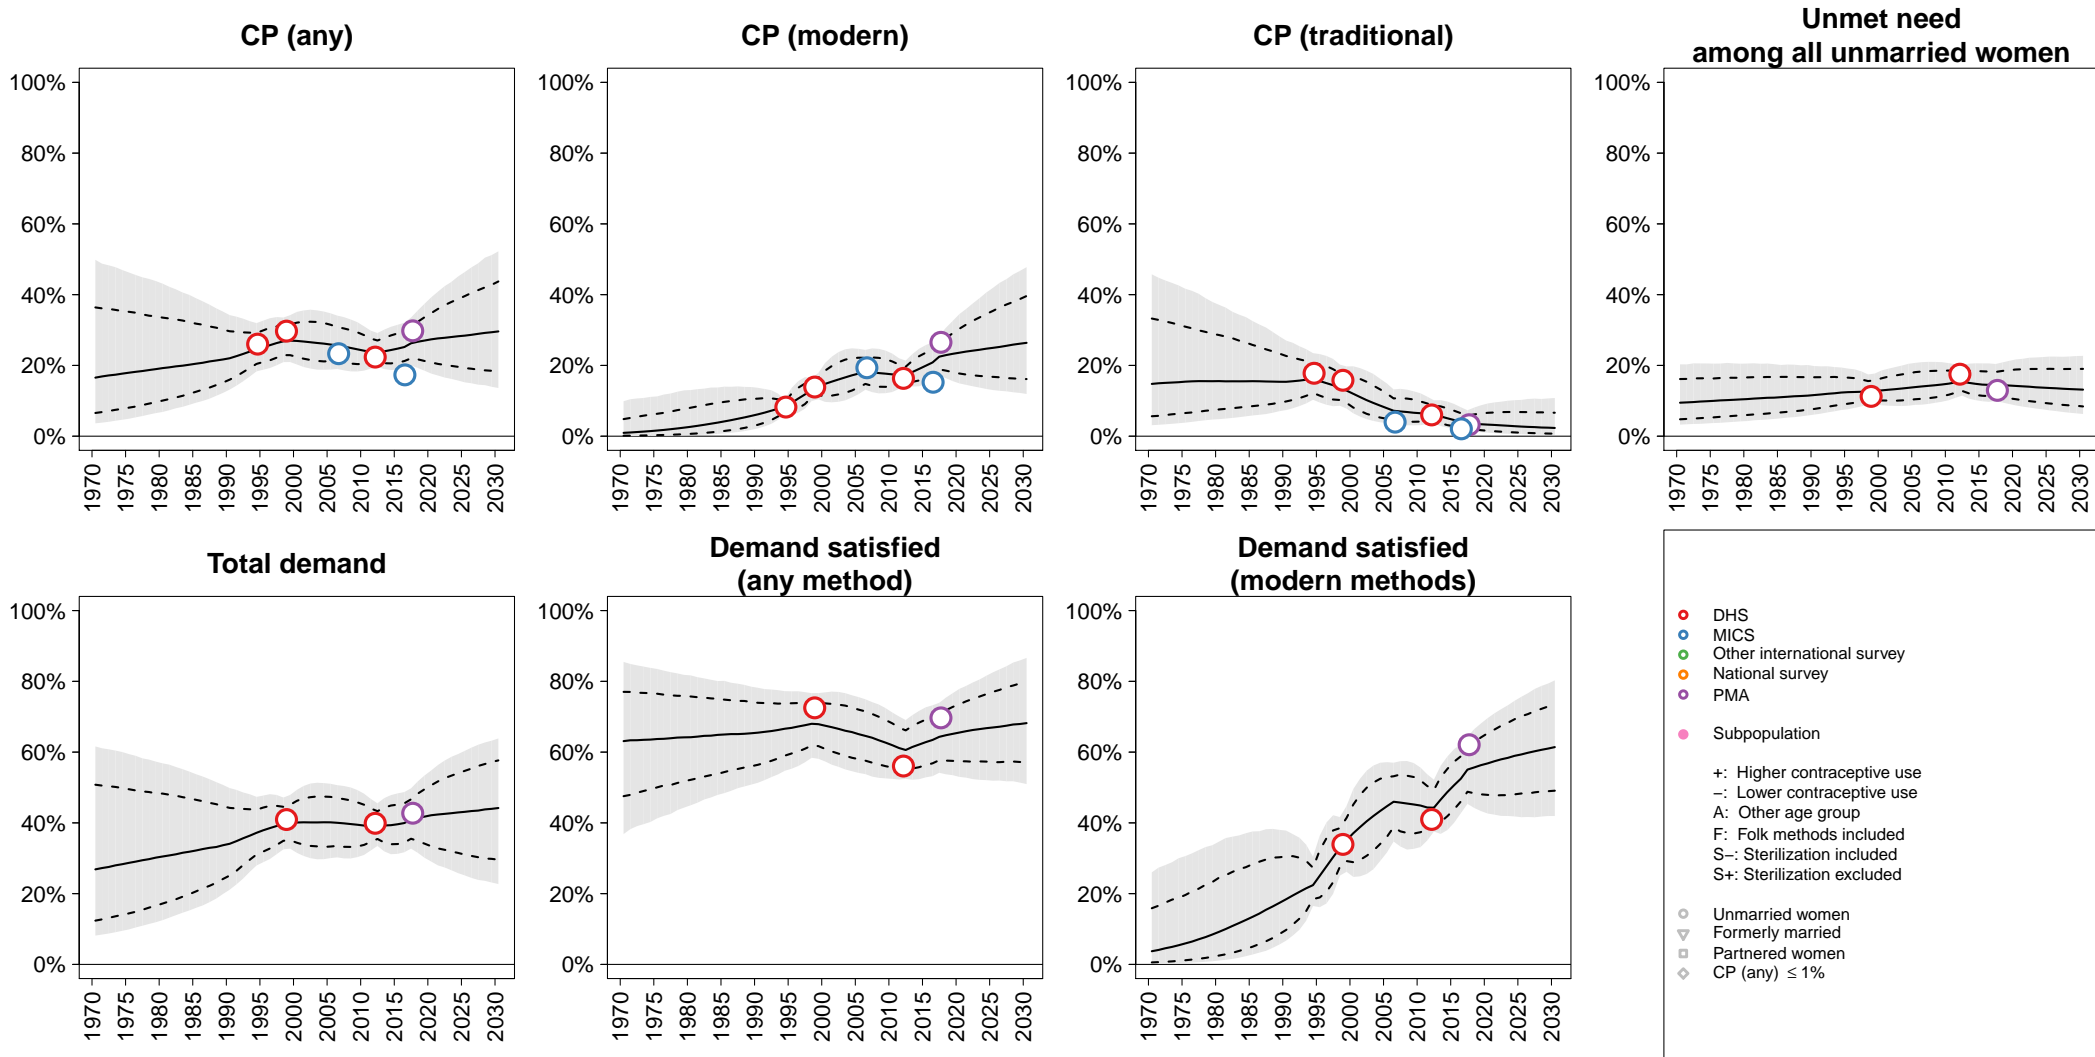

Croatia (Southern Europe, SA Group 1) --- Unmarried / Not In-Union

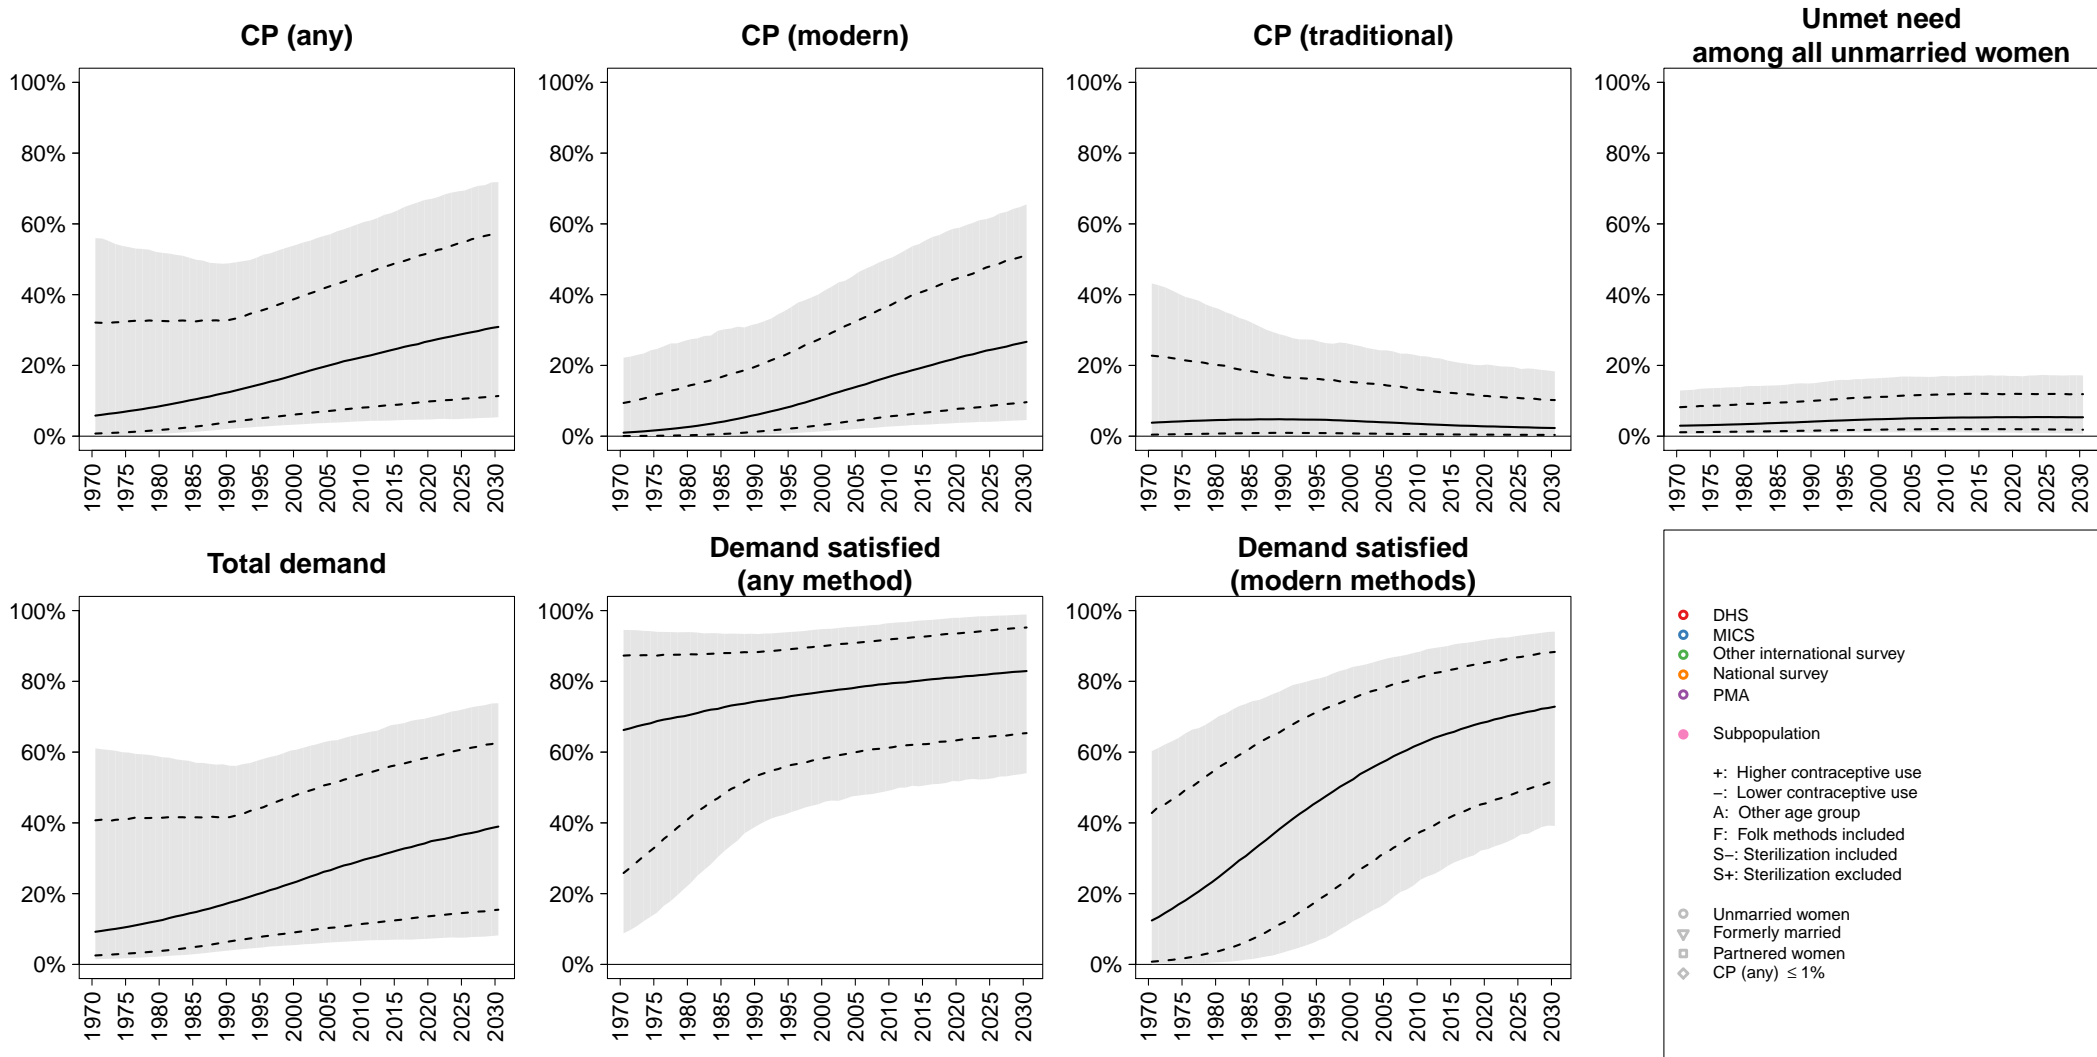

Cuba (Caribbean, SA Group 1) --- Unmarried / Not In-Union

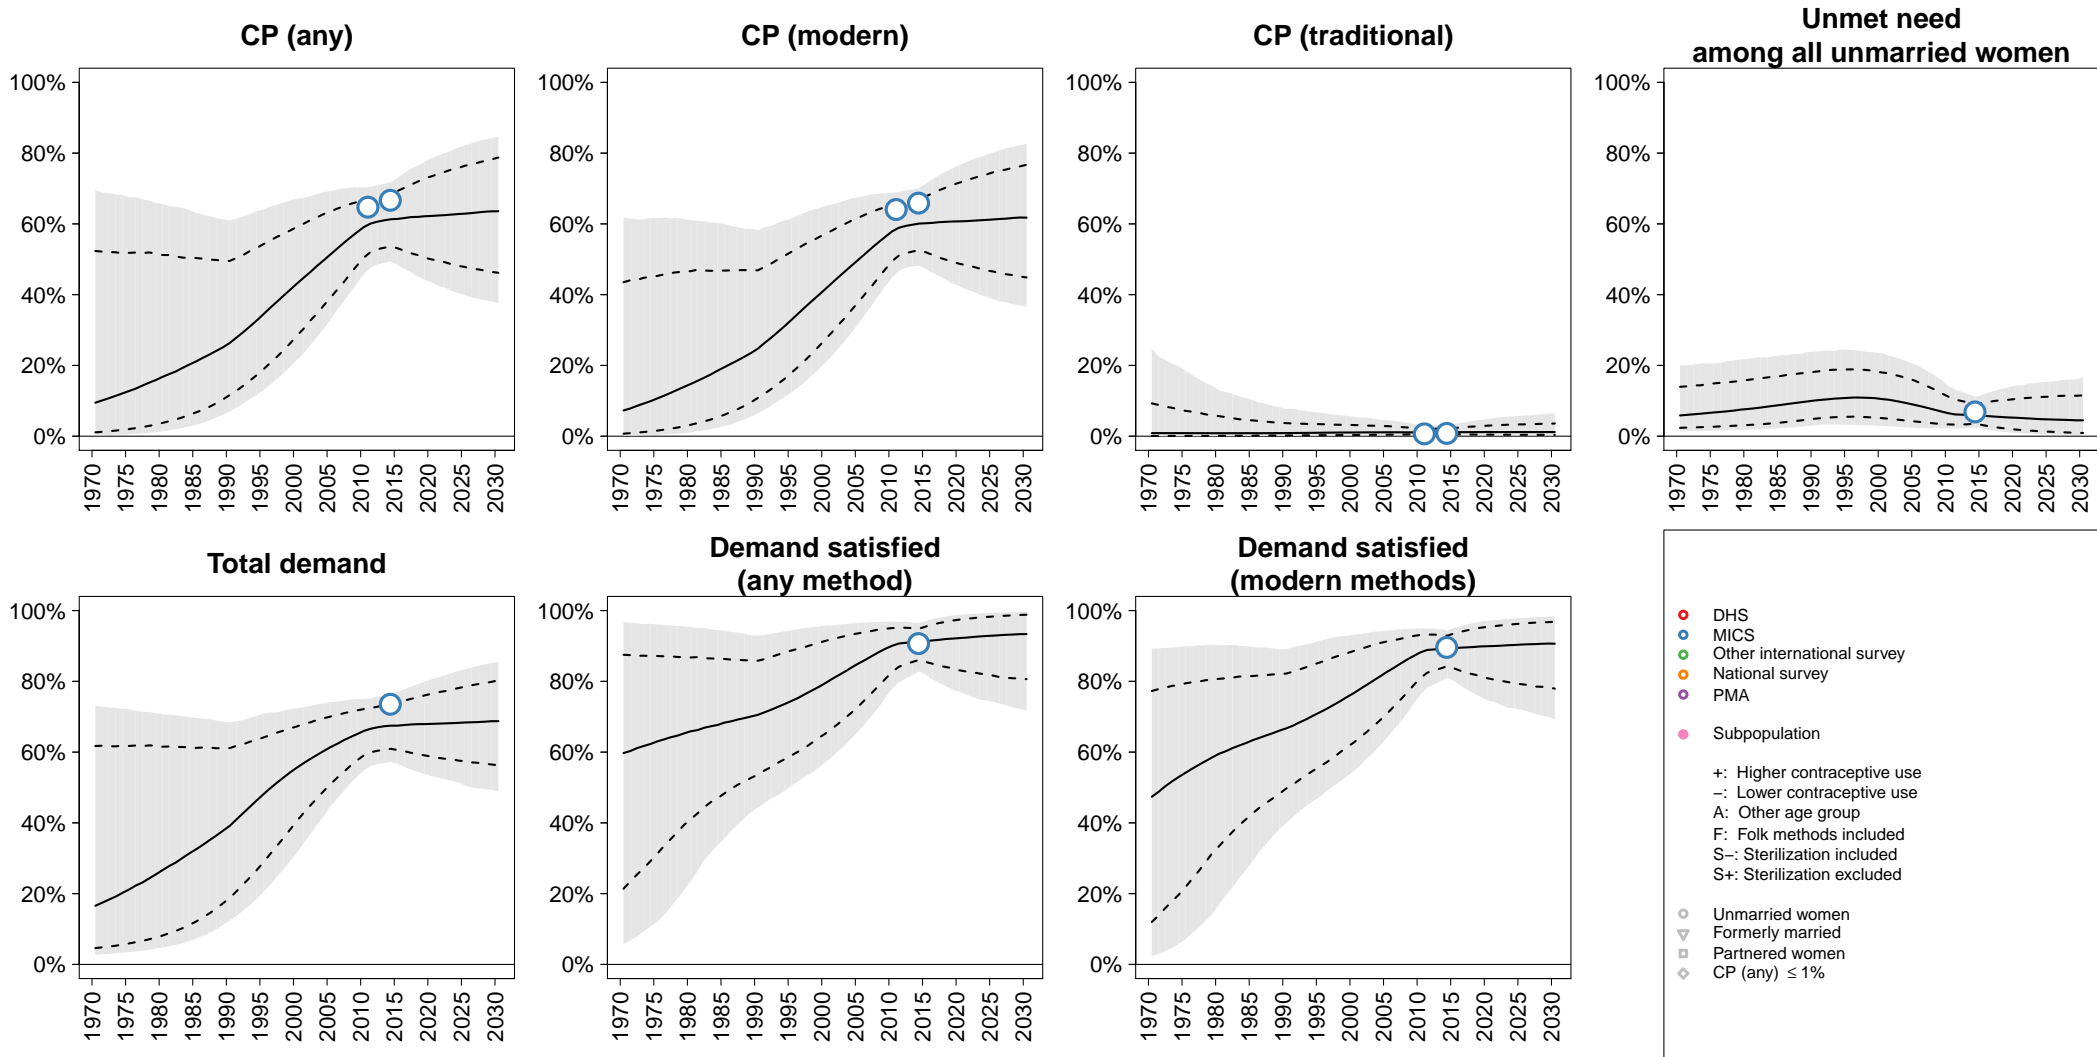

Czechia (Eastern Europe, SA Group 1) --- Unmarried / Not In-Union

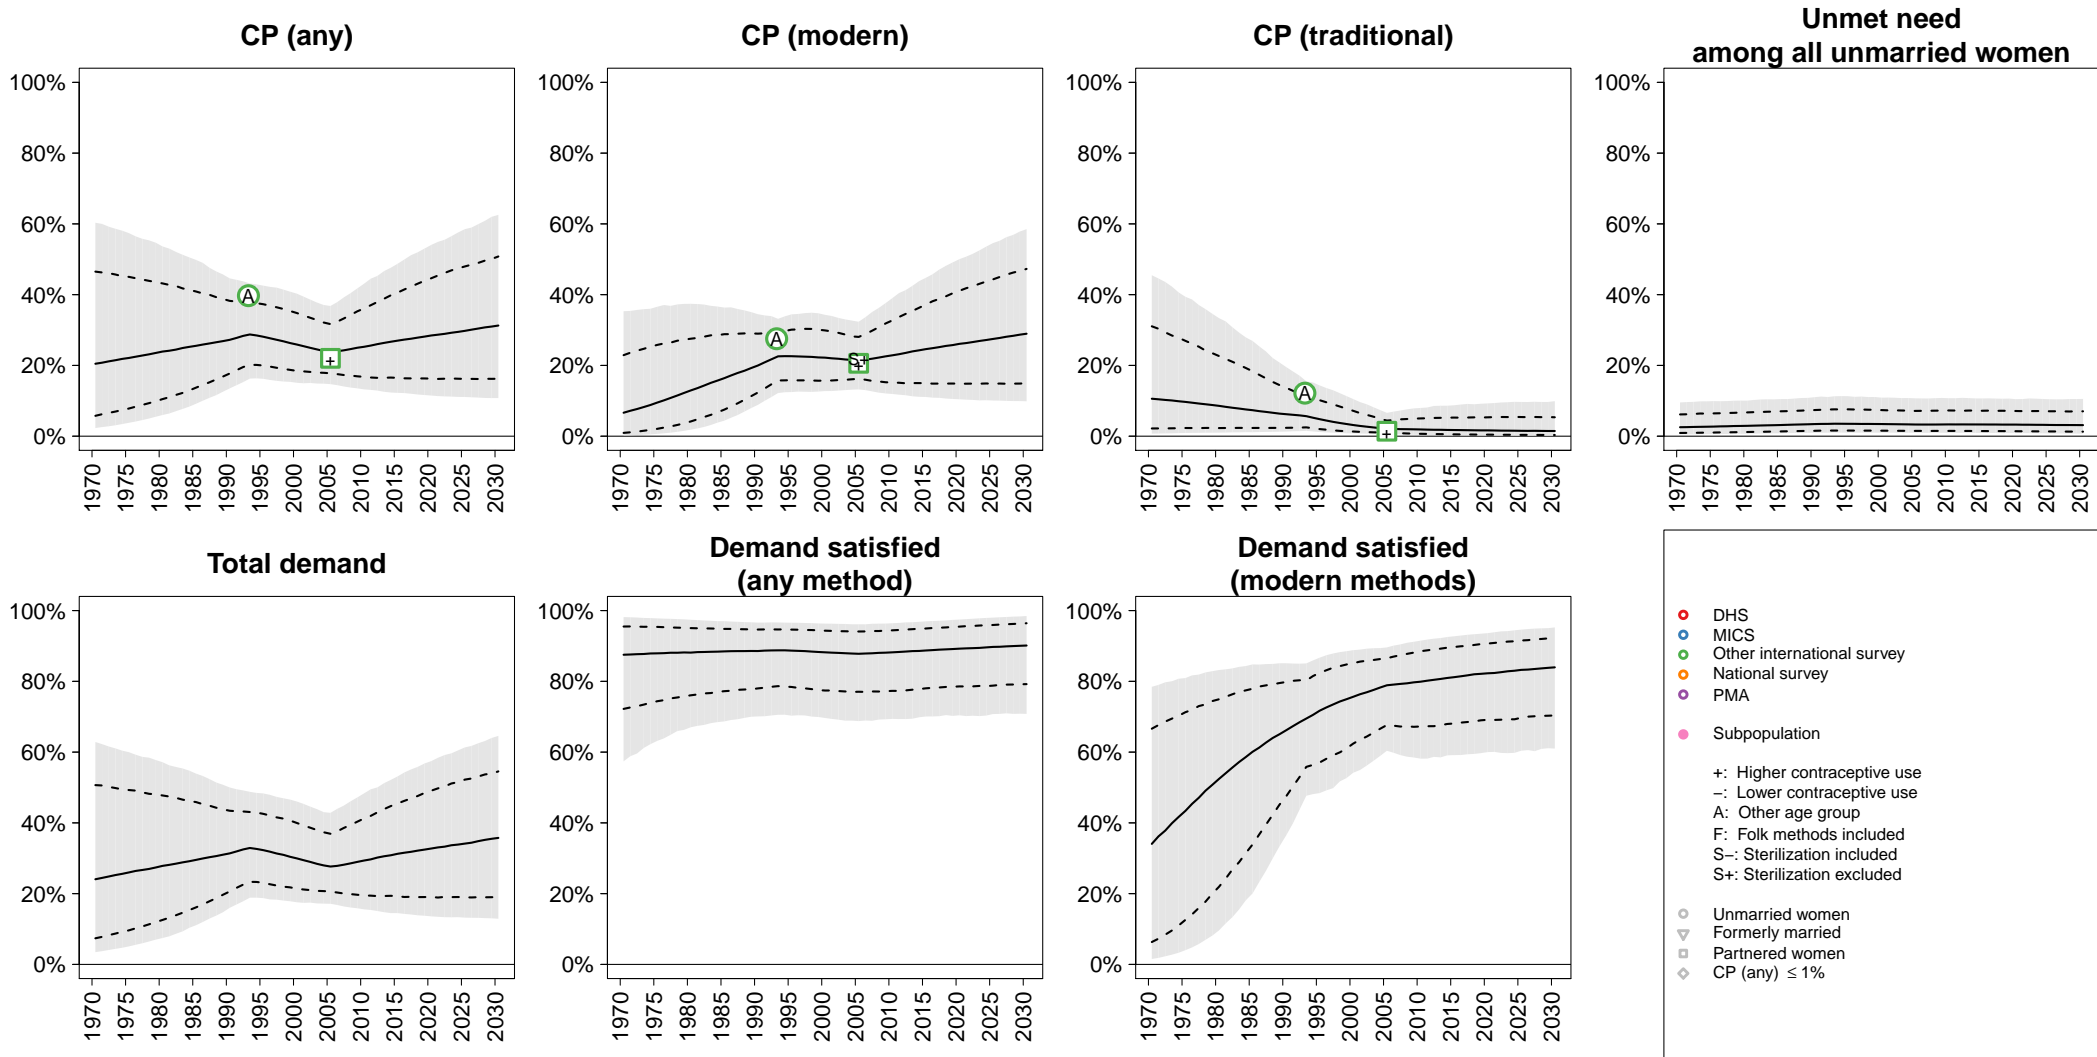

Democratic People's Rep. of Korea (Eastern Asia, SA Group 1) --- Unmarried / Not In-Union

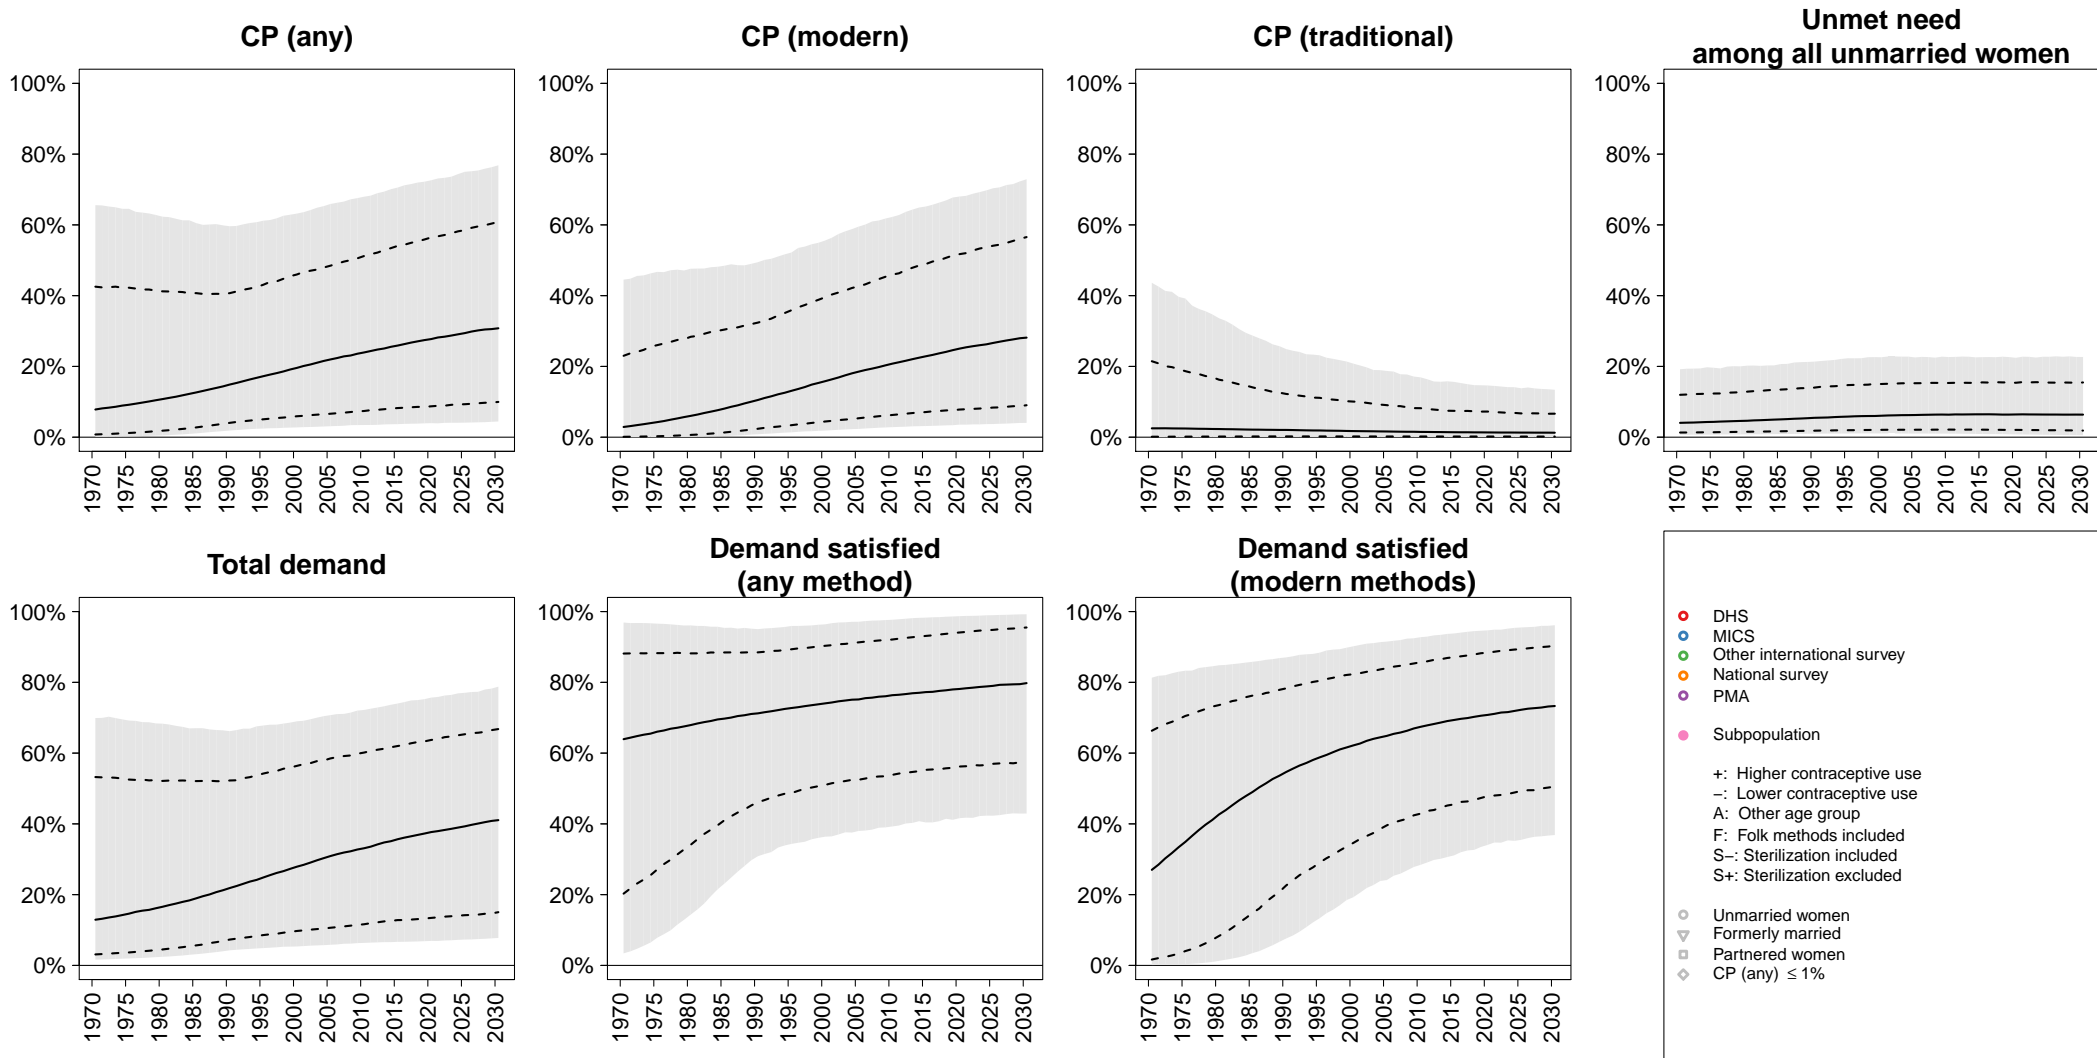



Democratic Rep. of the Congo (Middle Africa, SA Group 1) --- Unmarried / Not In-Union

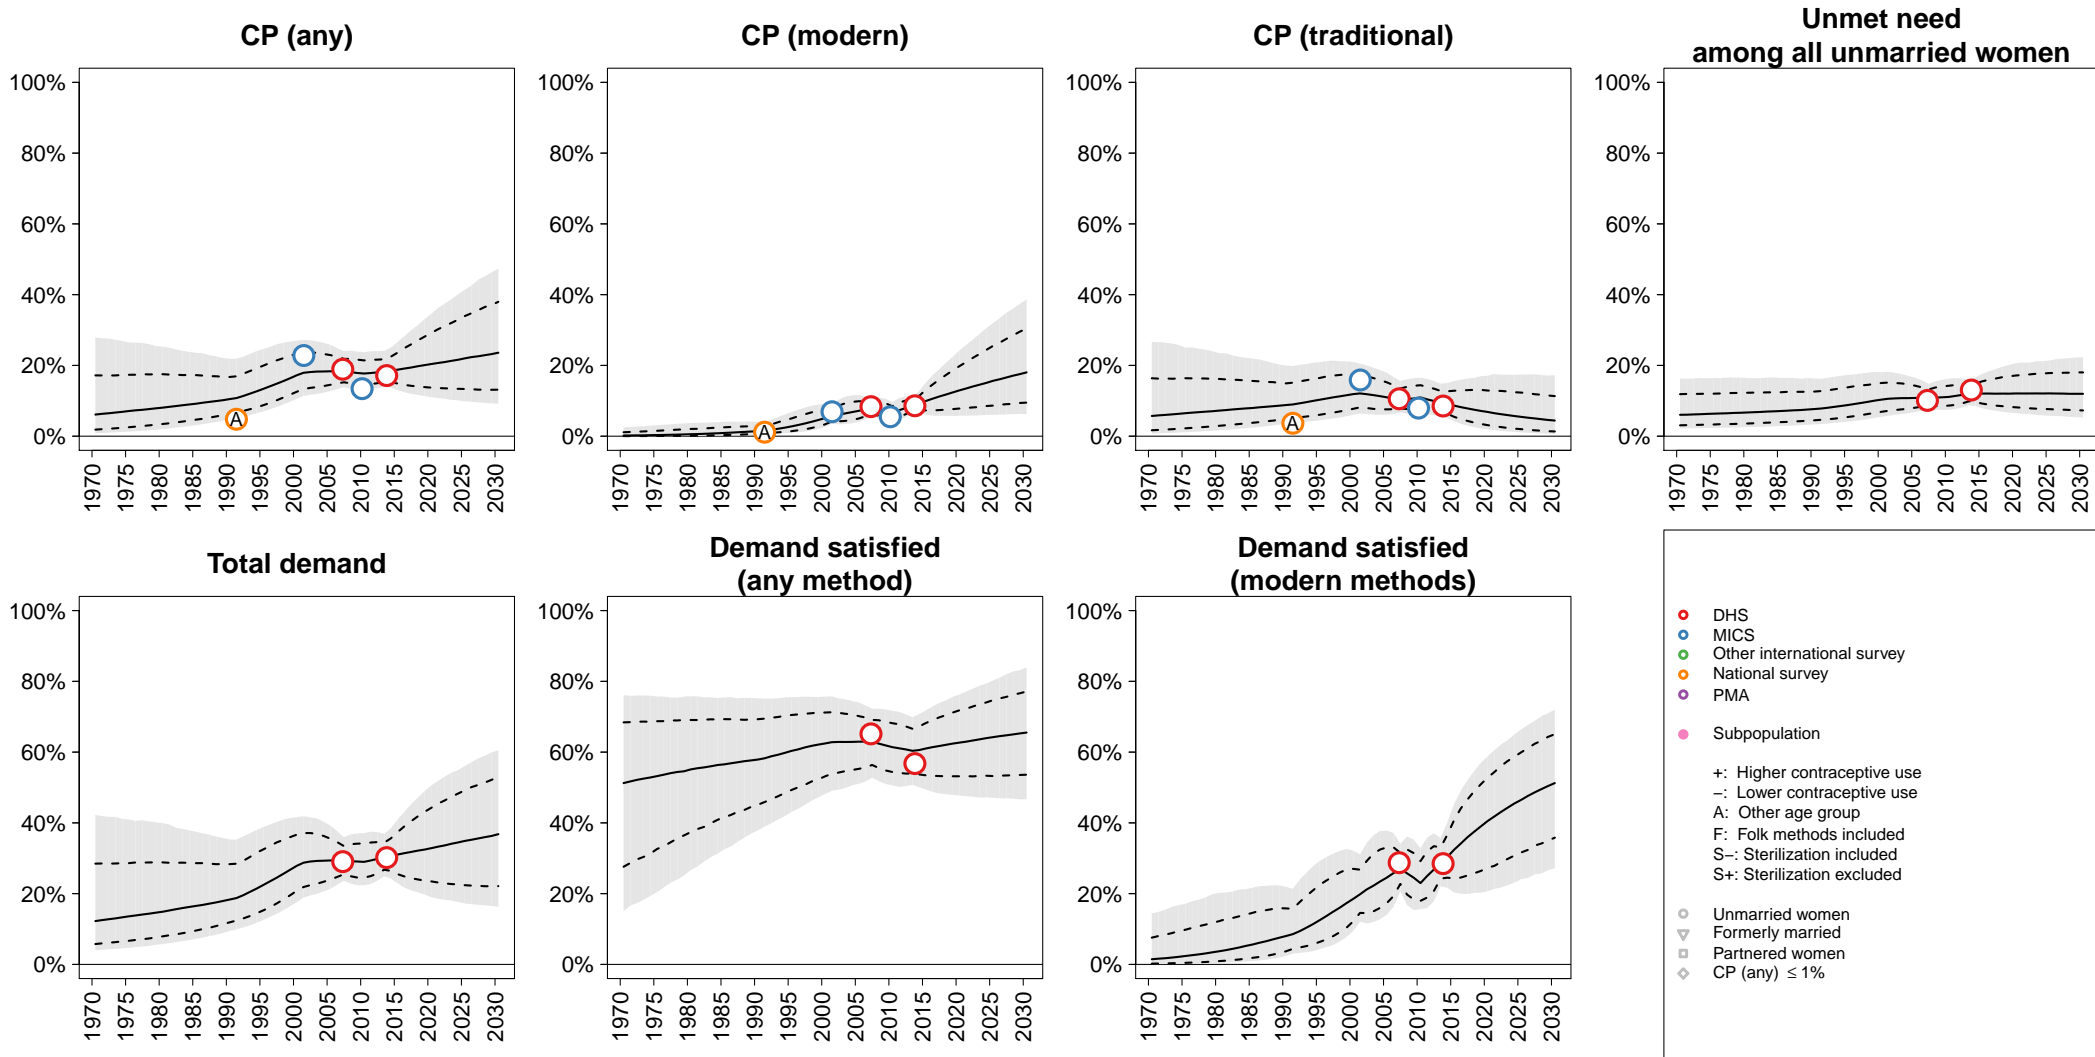

Democratic Republic of Timor-Leste (South-eastern Asia, SA Group 0) --- Unmarried / Not In-Union

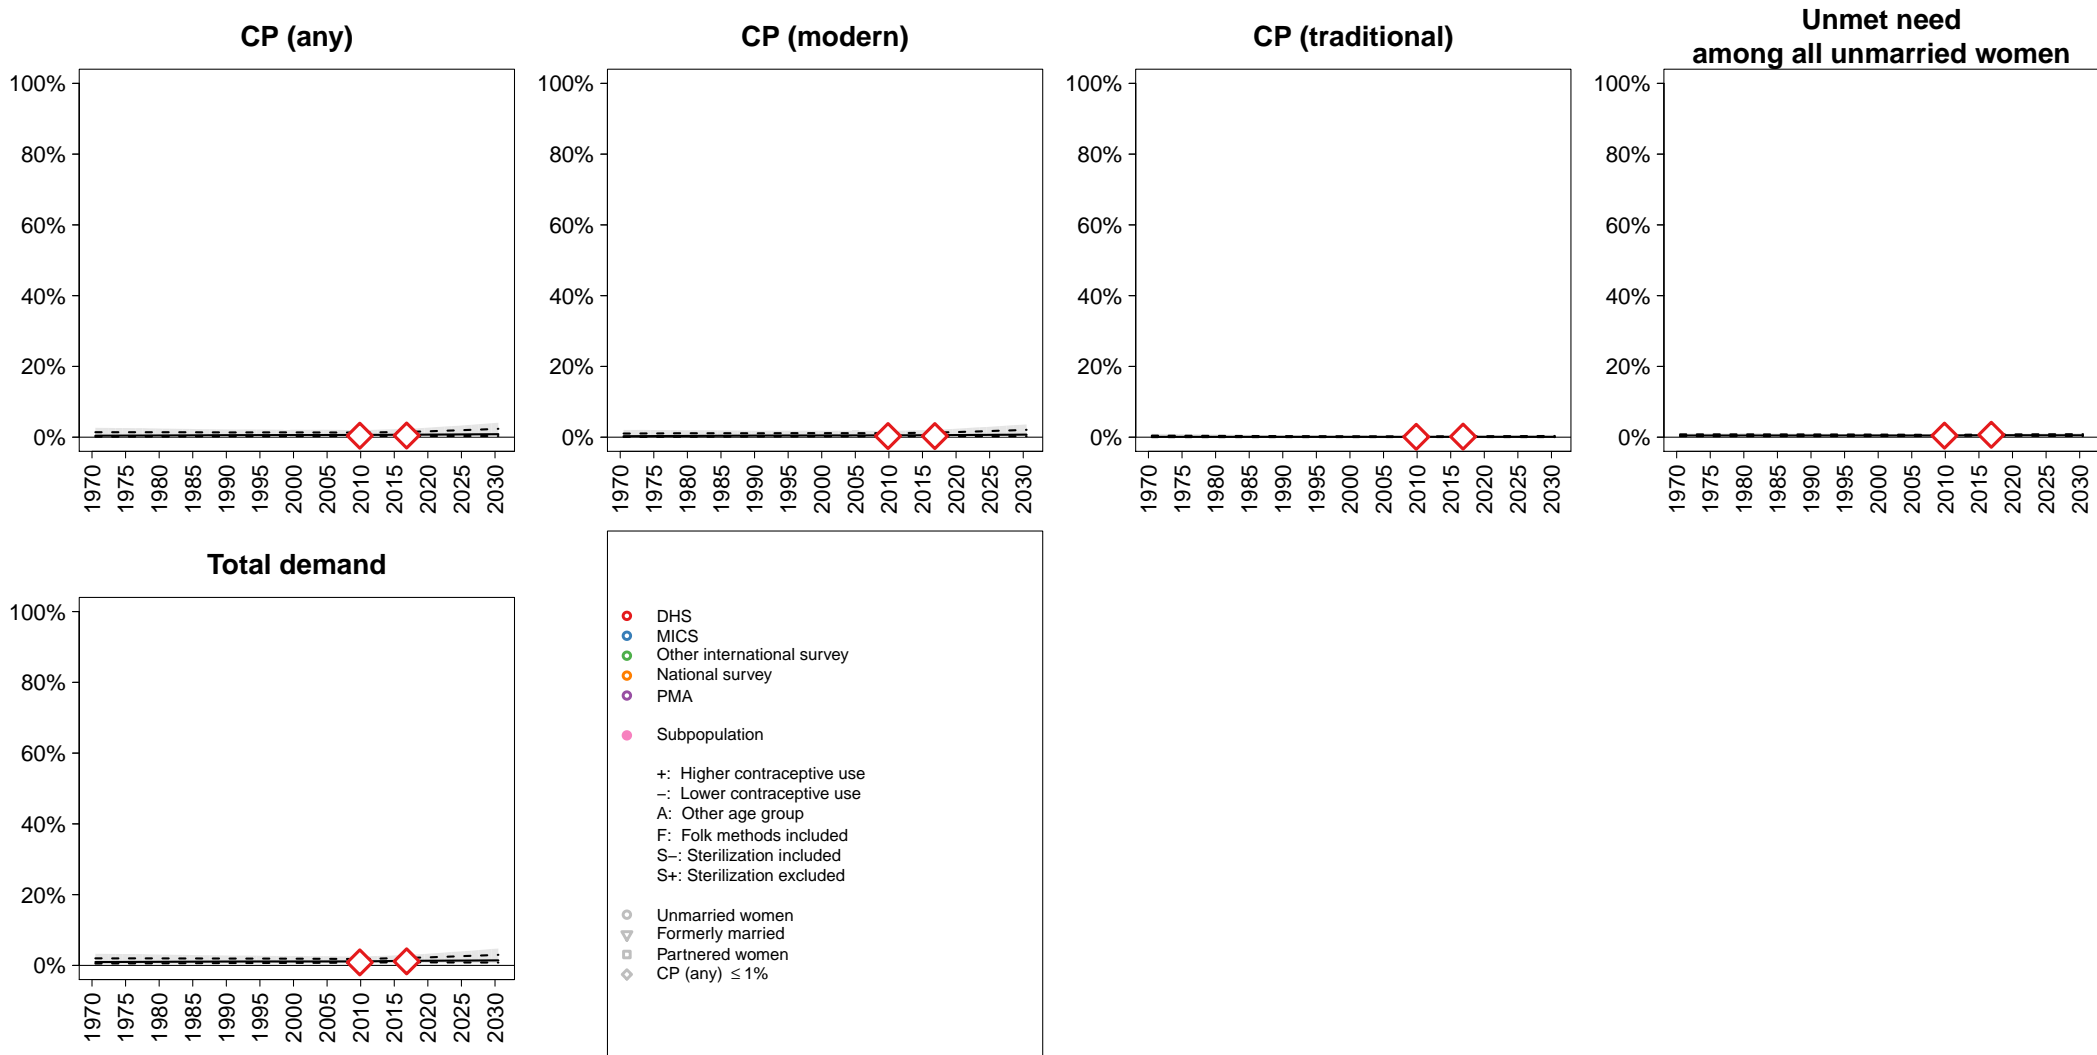

Denmark (Northern Europe, SA Group 1) --- Unmarried / Not In-Union

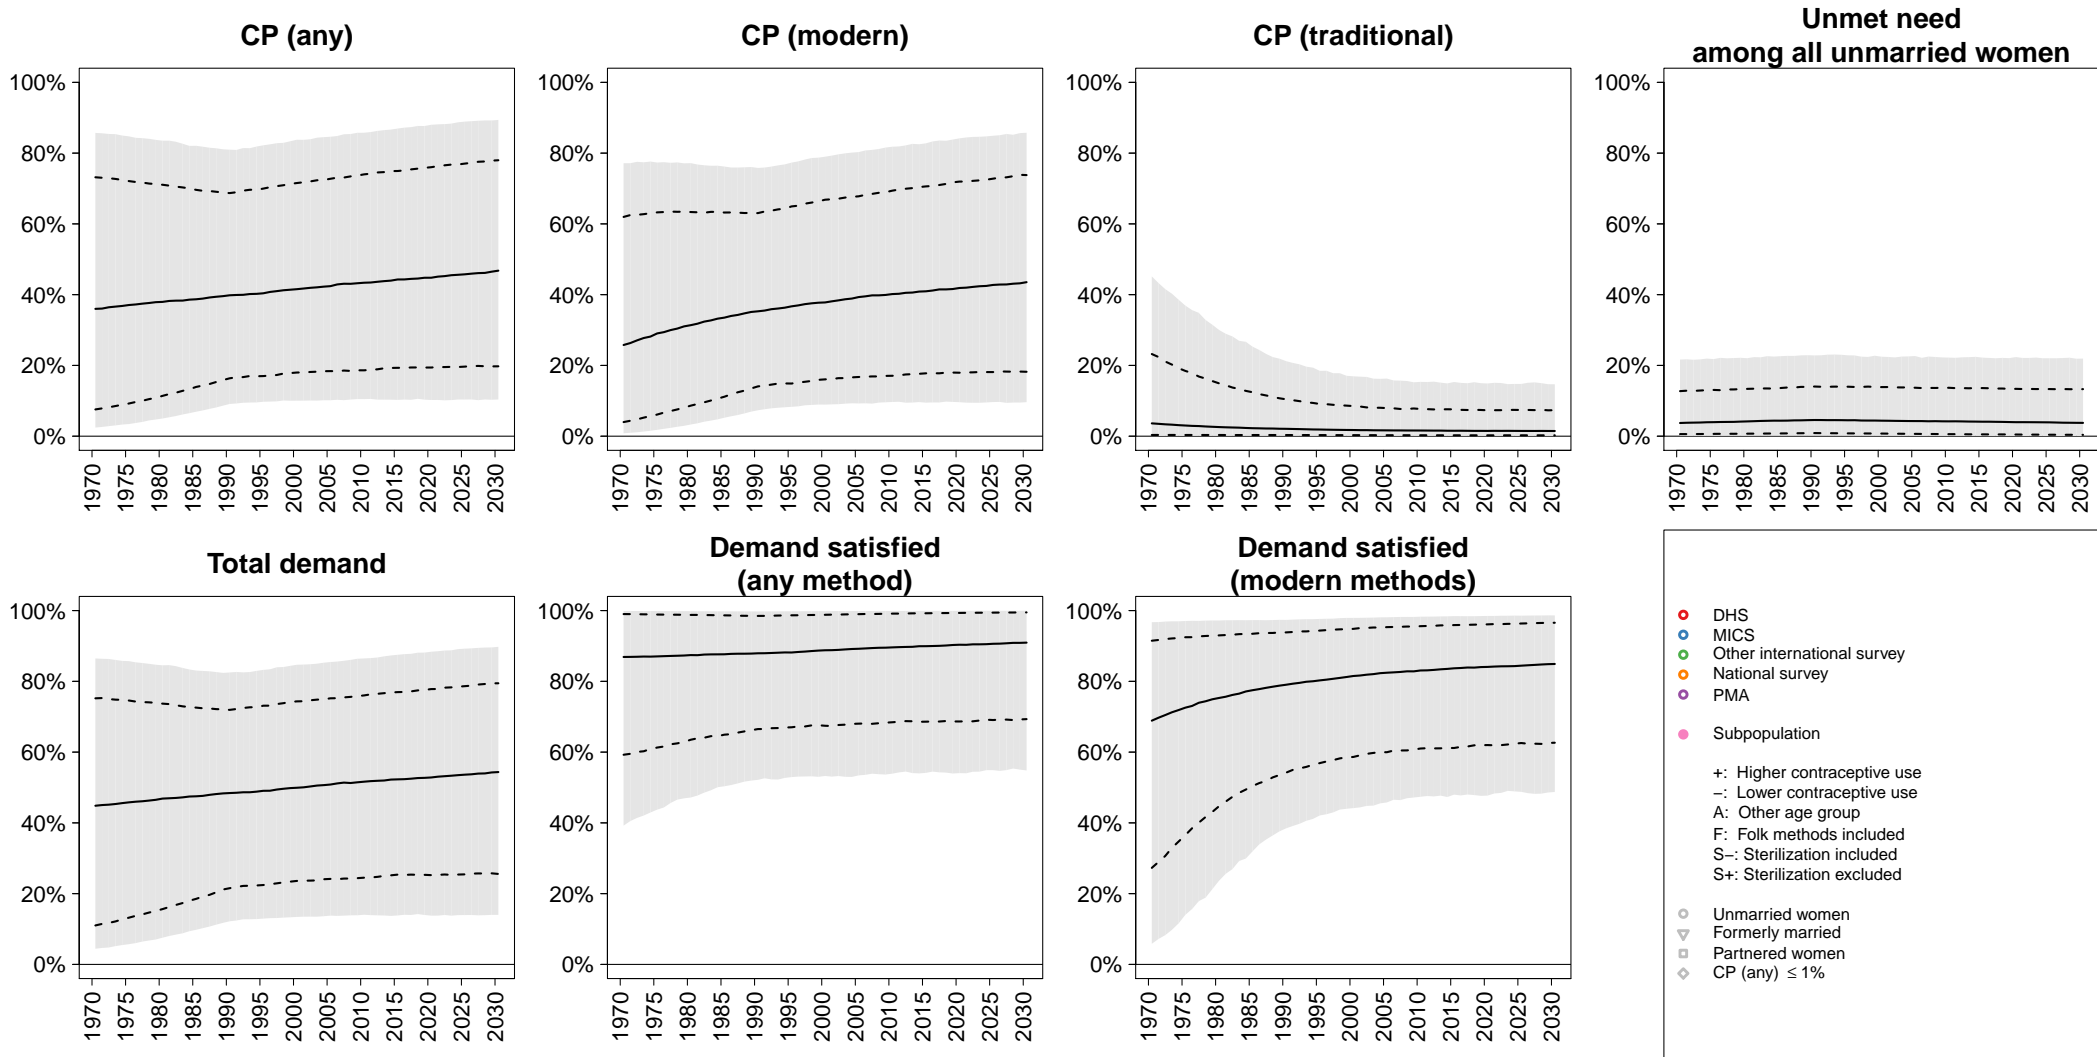

Djibouti (Eastern Africa, SA Group 0) --- Unmarried / Not In-Union

CP (any)

CP (modern)

CP (traditional)

Unmet need among all unmarried women

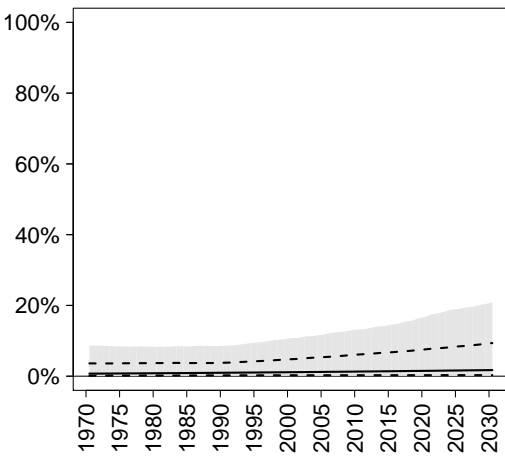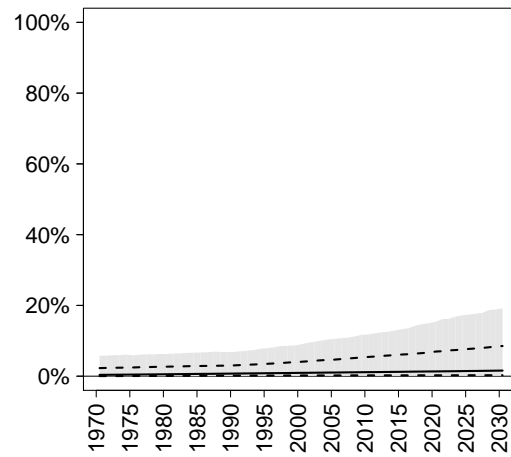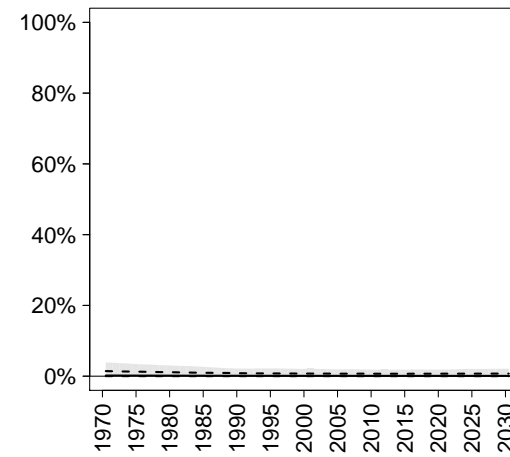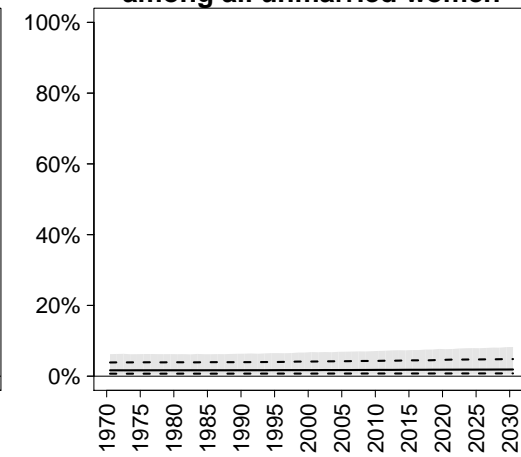

Total demand

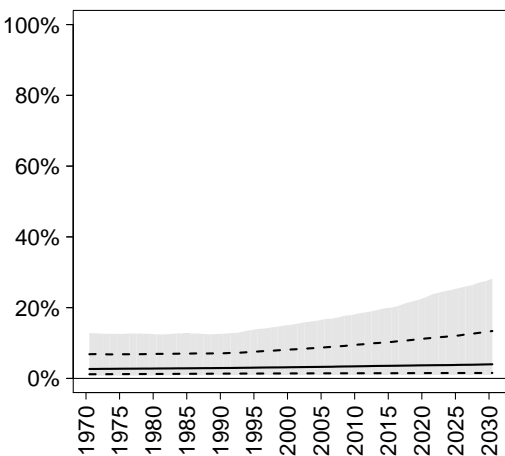

- DHS
- MICS
- Other international survey
- National survey
- PMA
- Subpopulation
- +: Higher contraceptive use
- : Lower contraceptive use
- A: Other age group
- F: Folk methods included
- S-: Sterilization included
- S+: Sterilization excluded
- Unmarried women
- ▽ Formerly married
- ◻ Partnered women
- ◇ CP (any) ≤ 1%

Dominican Republic (Caribbean, SA Group 1) --- Unmarried / Not In-Union

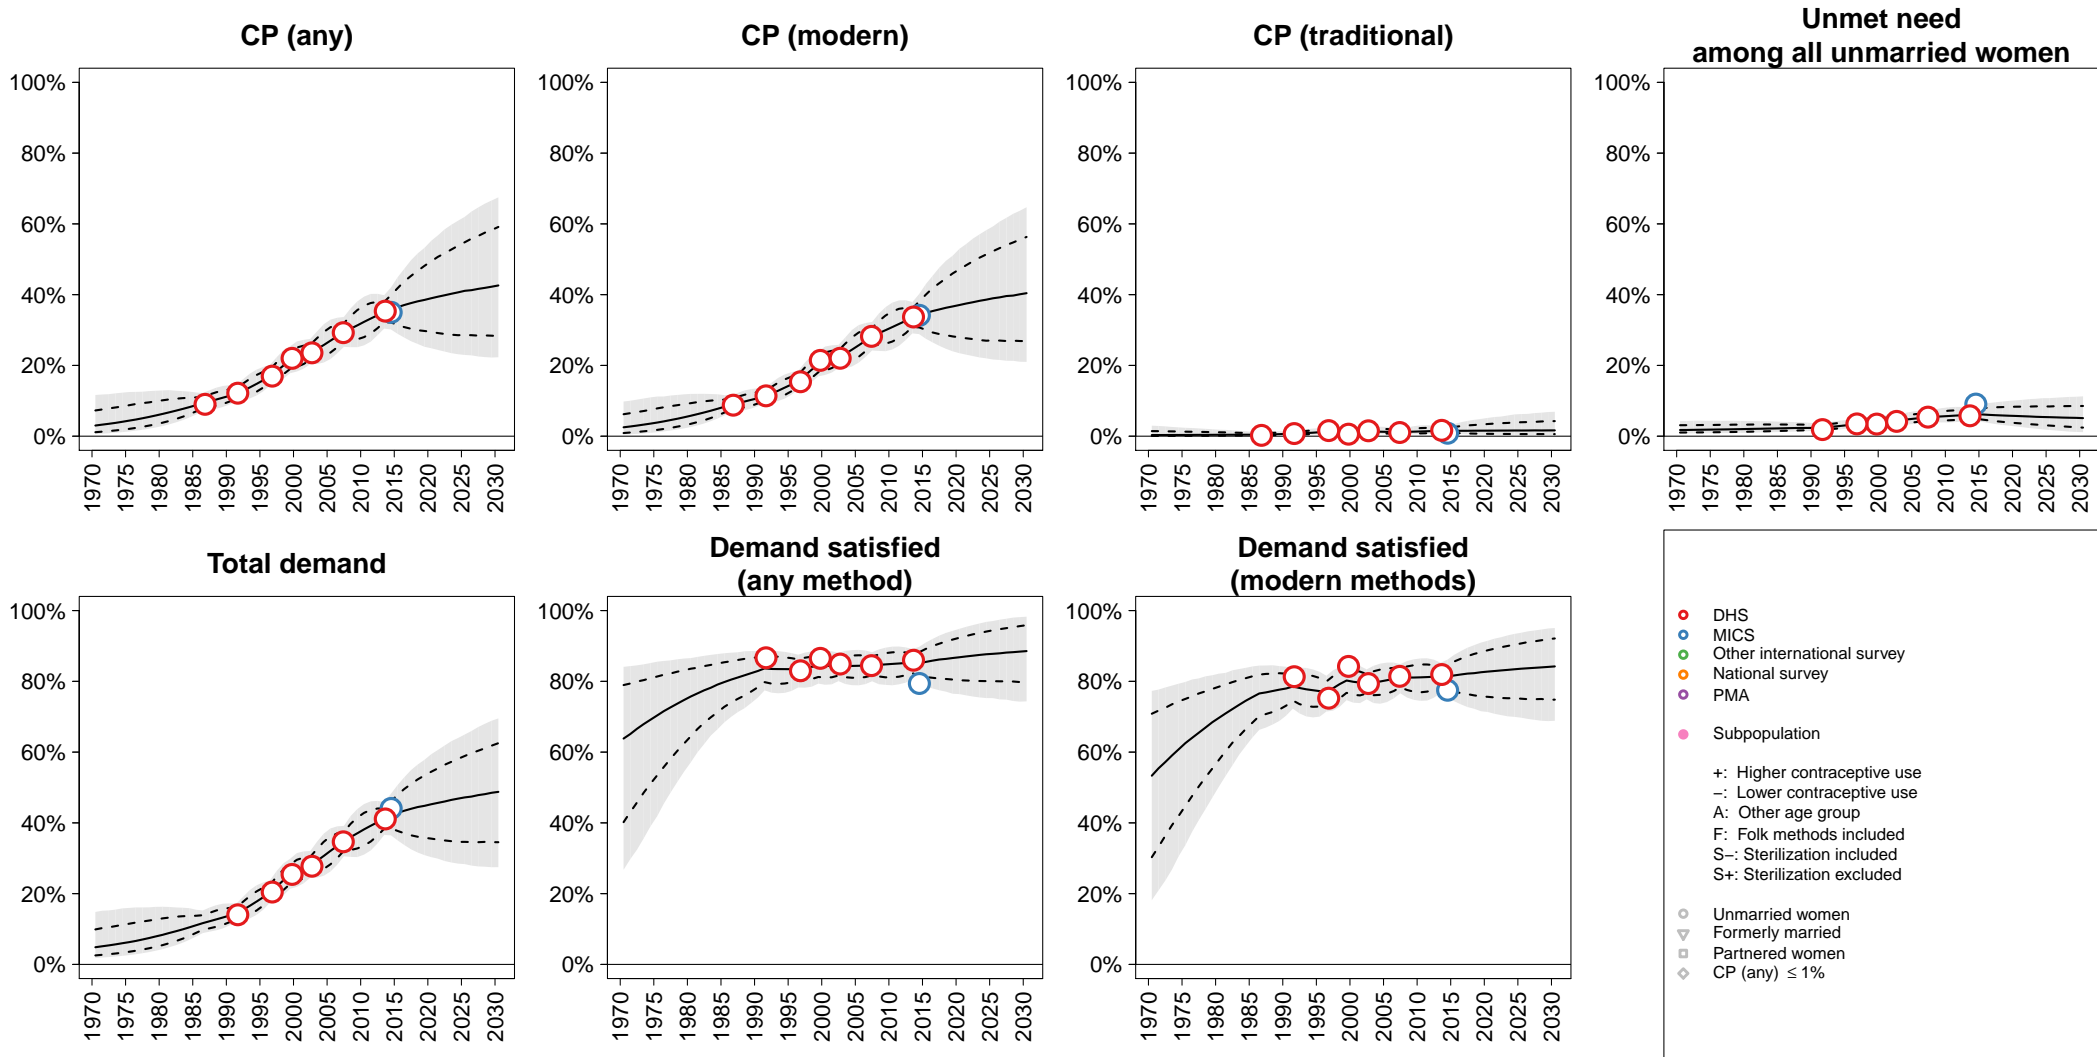

Ecuador (South America, SA Group 1) --- Unmarried / Not In-Union

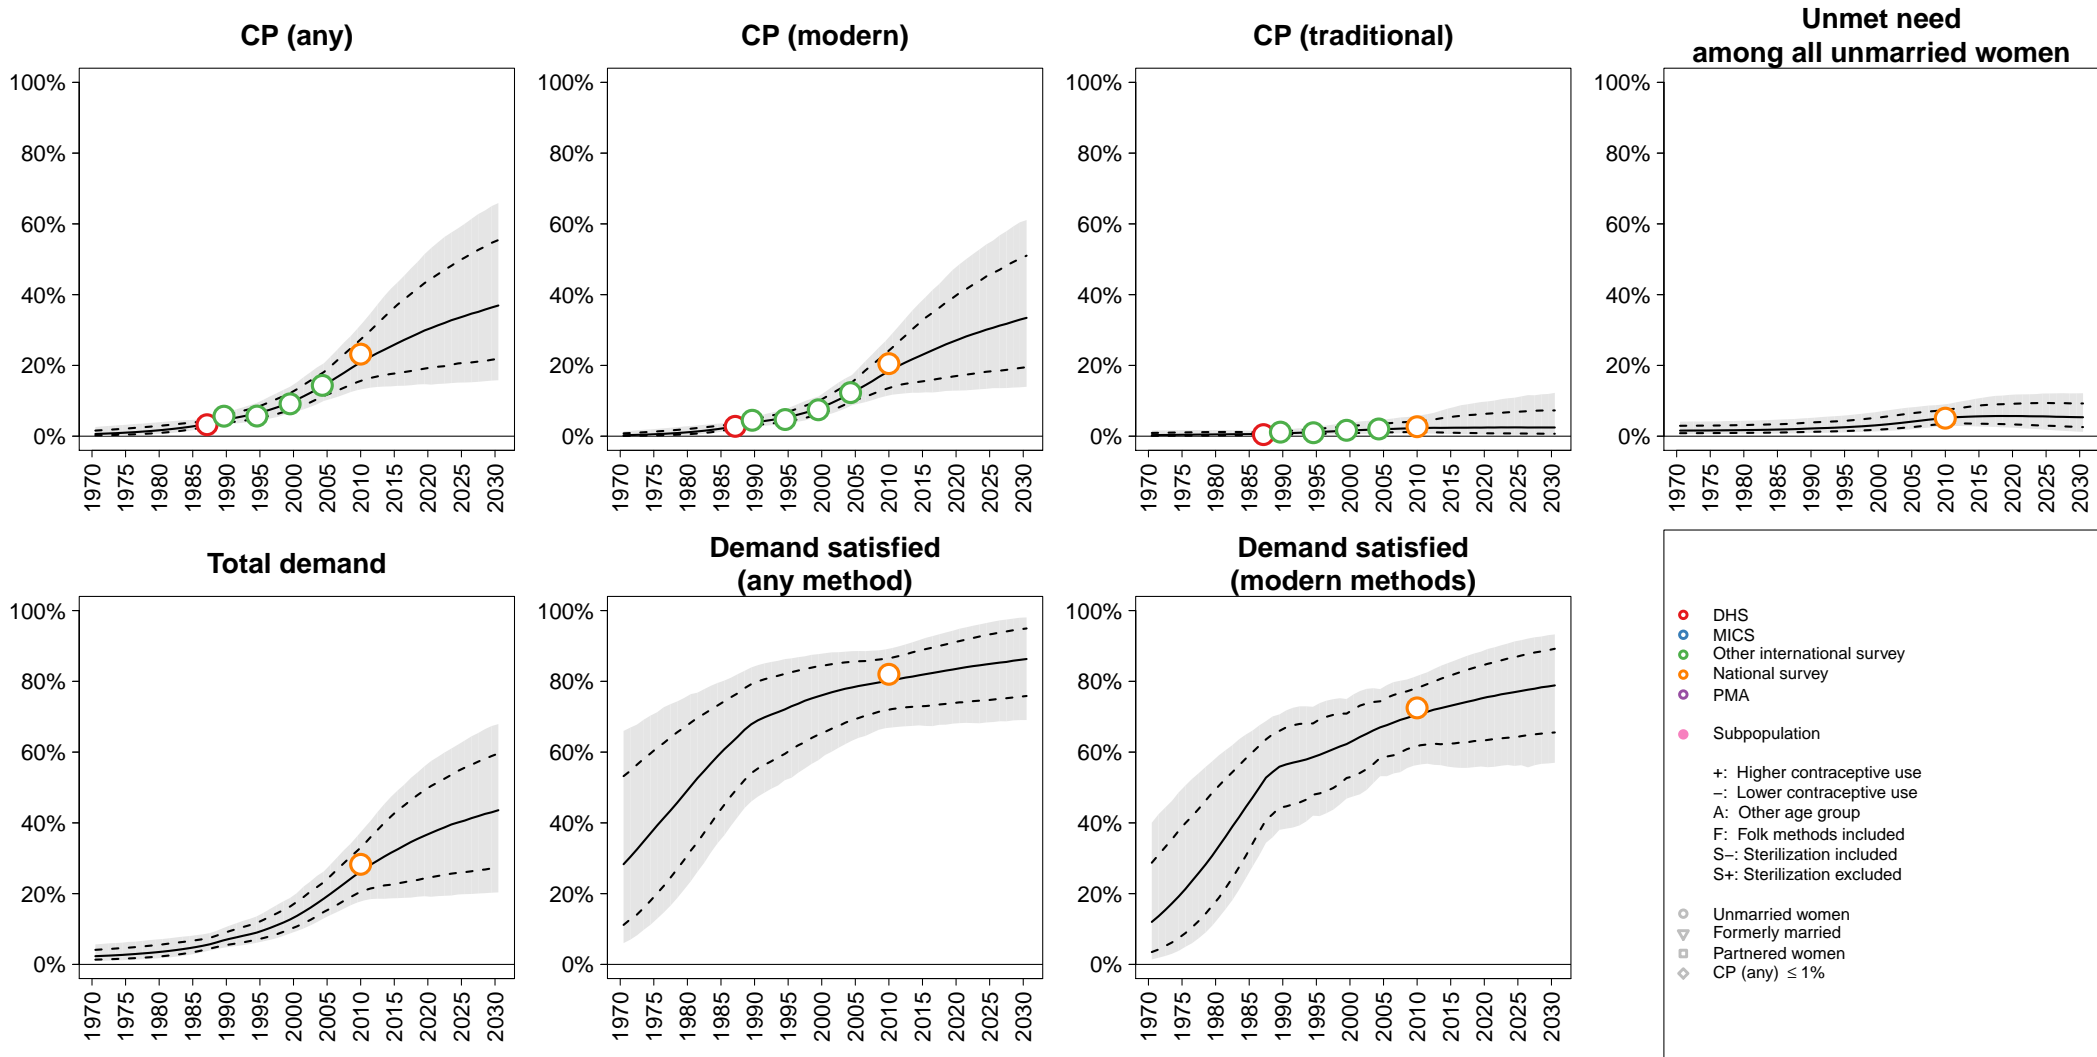

Egypt (Northern Africa, SA Group 0) --- Unmarried / Not In-Union

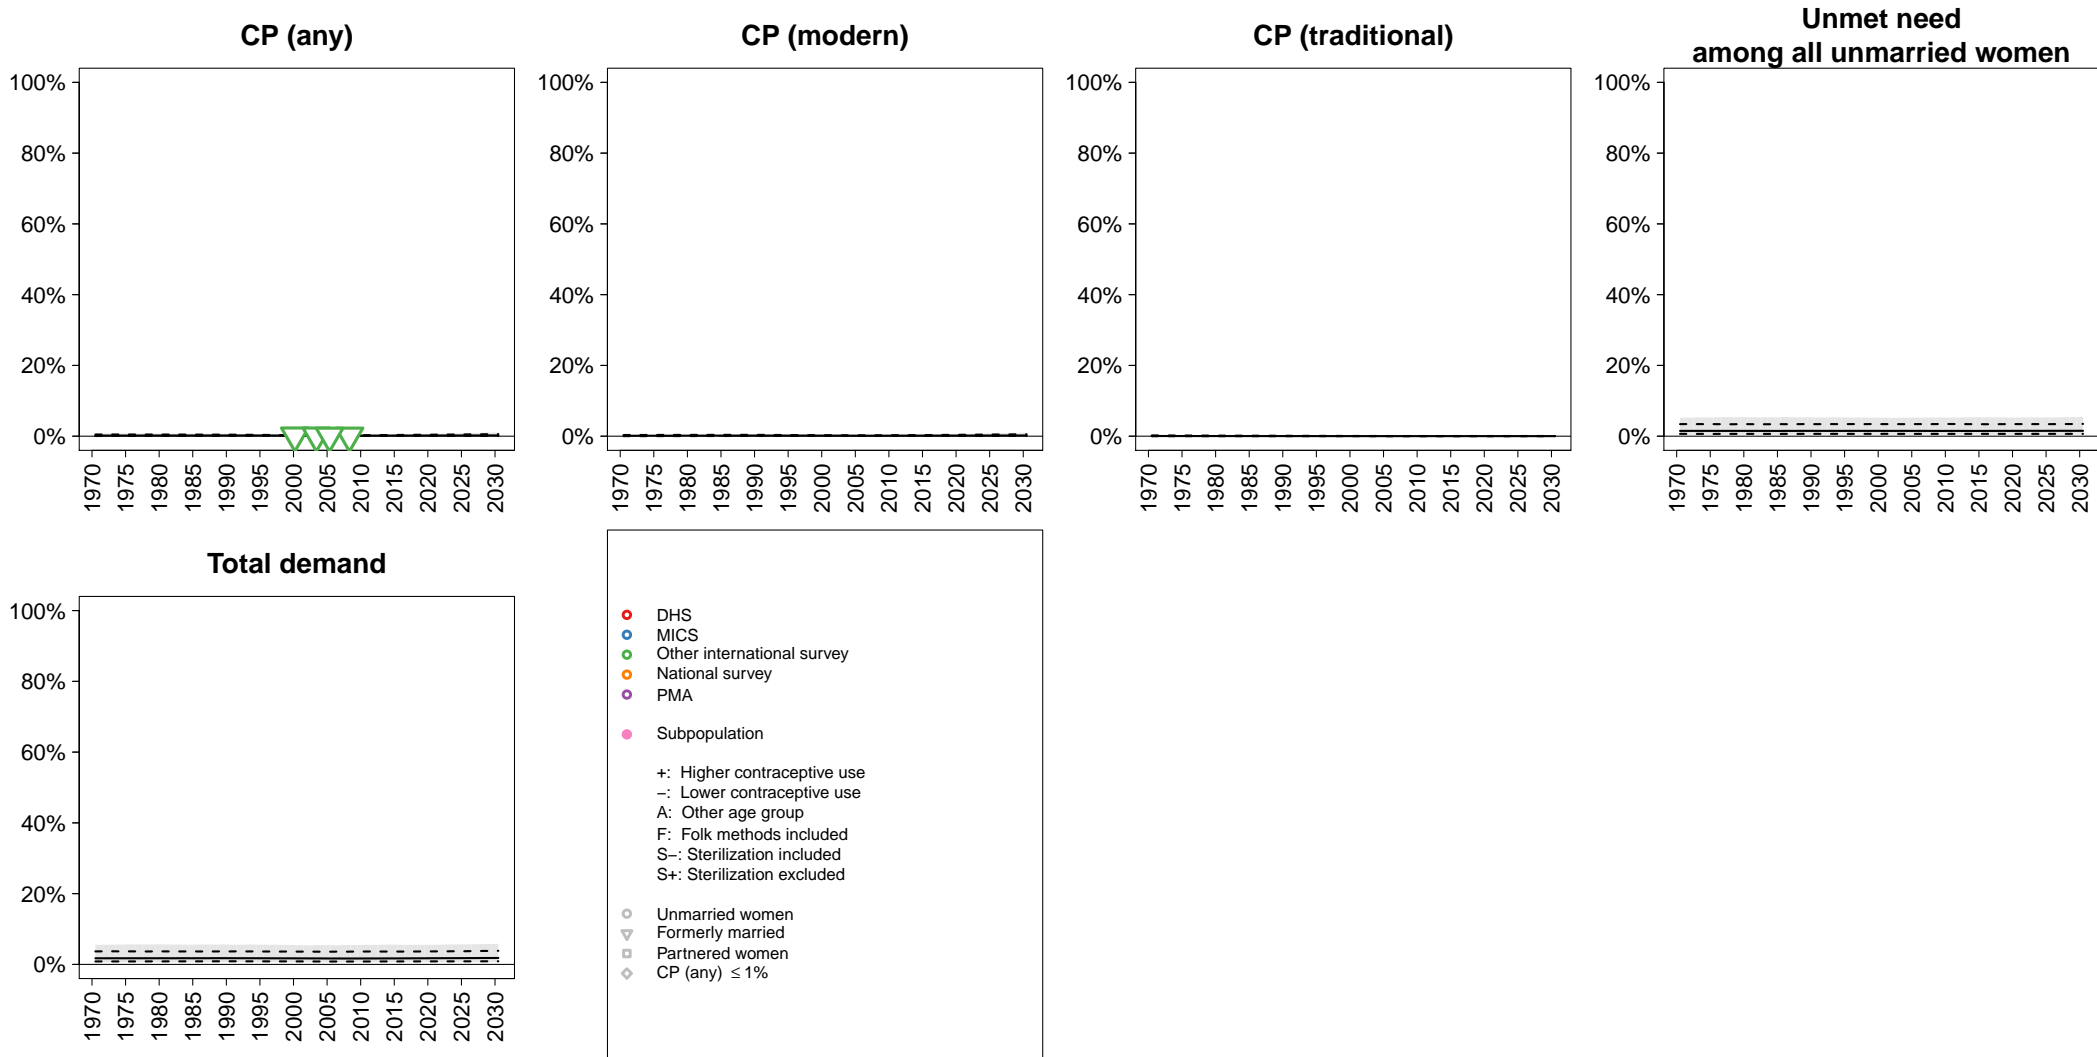

El Salvador (Central America, SA Group 1) --- Unmarried / Not In-Union

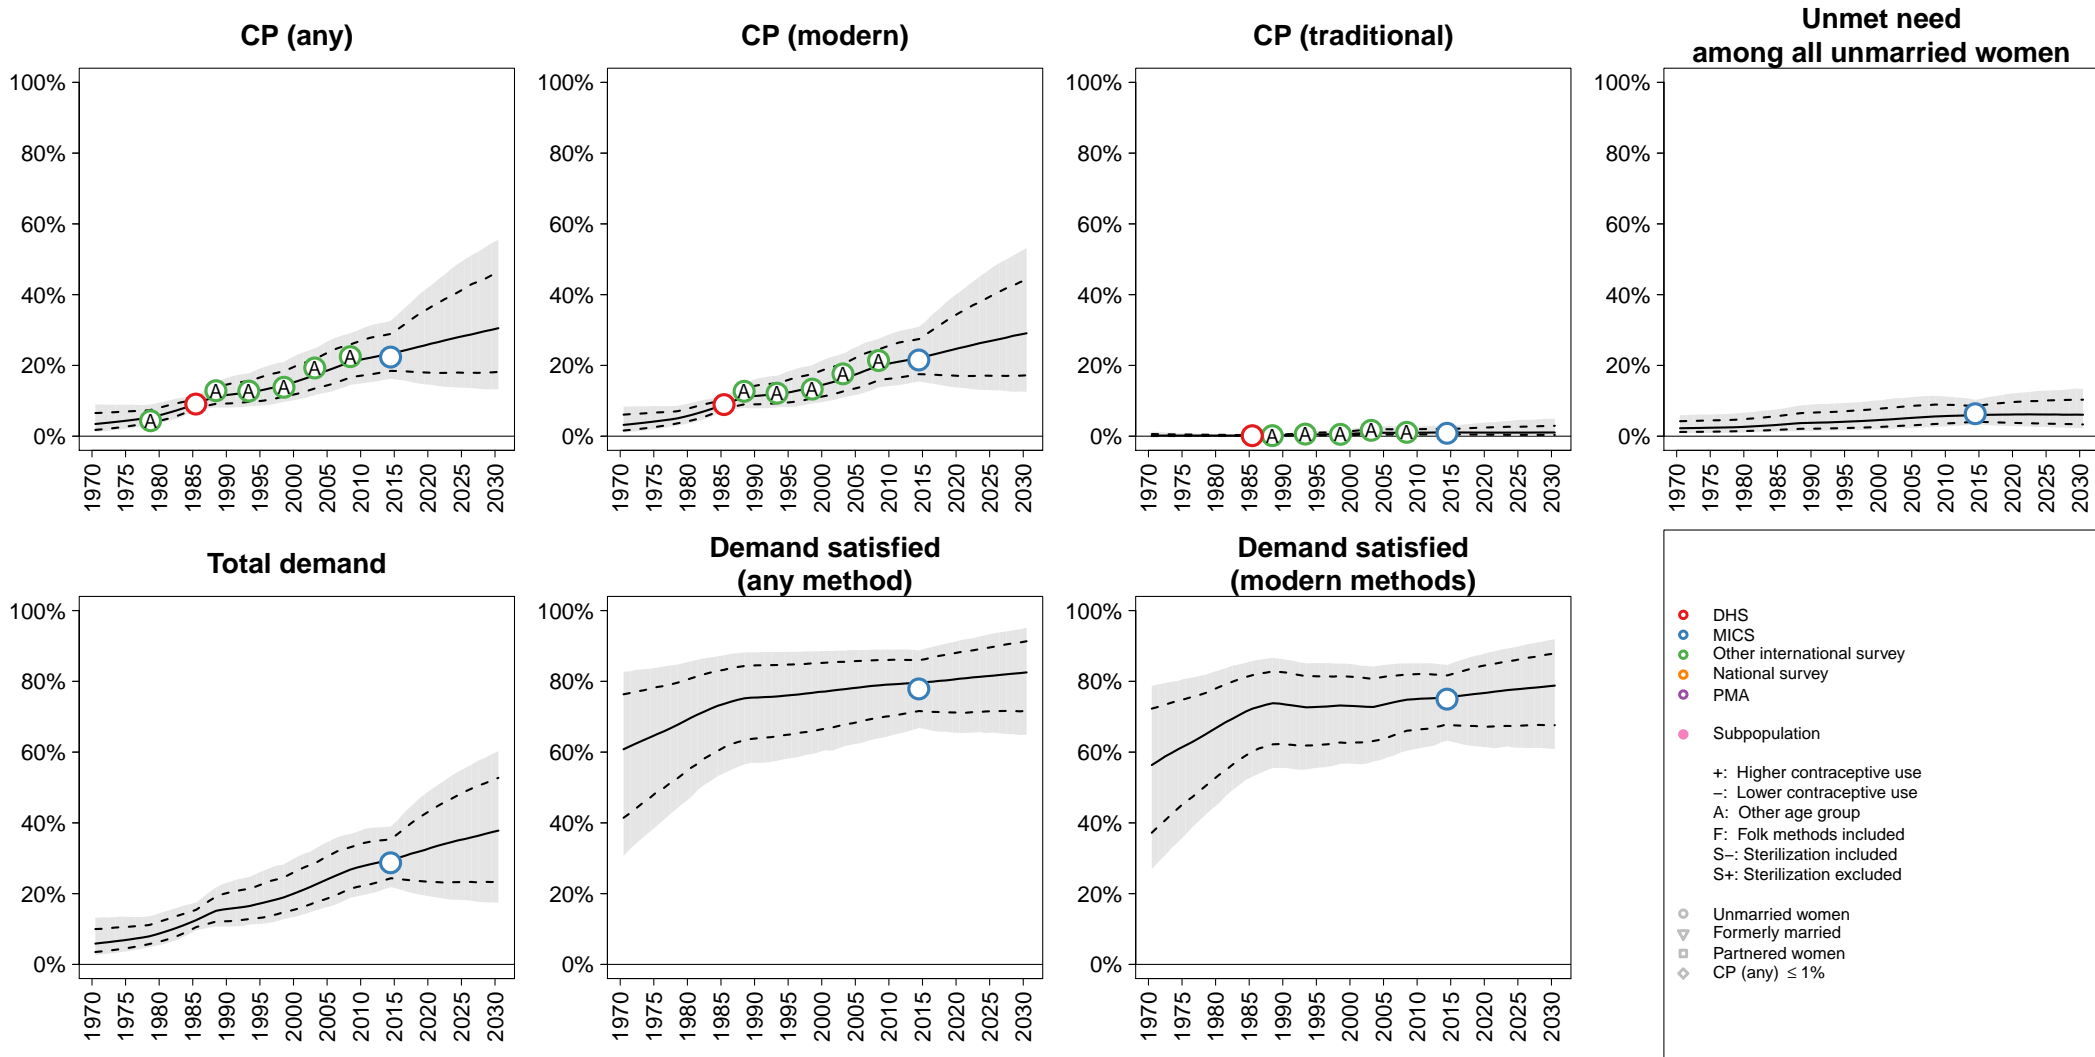



Equatorial Guinea (Middle Africa, SA Group 1) --- Unmarried / Not In-Union

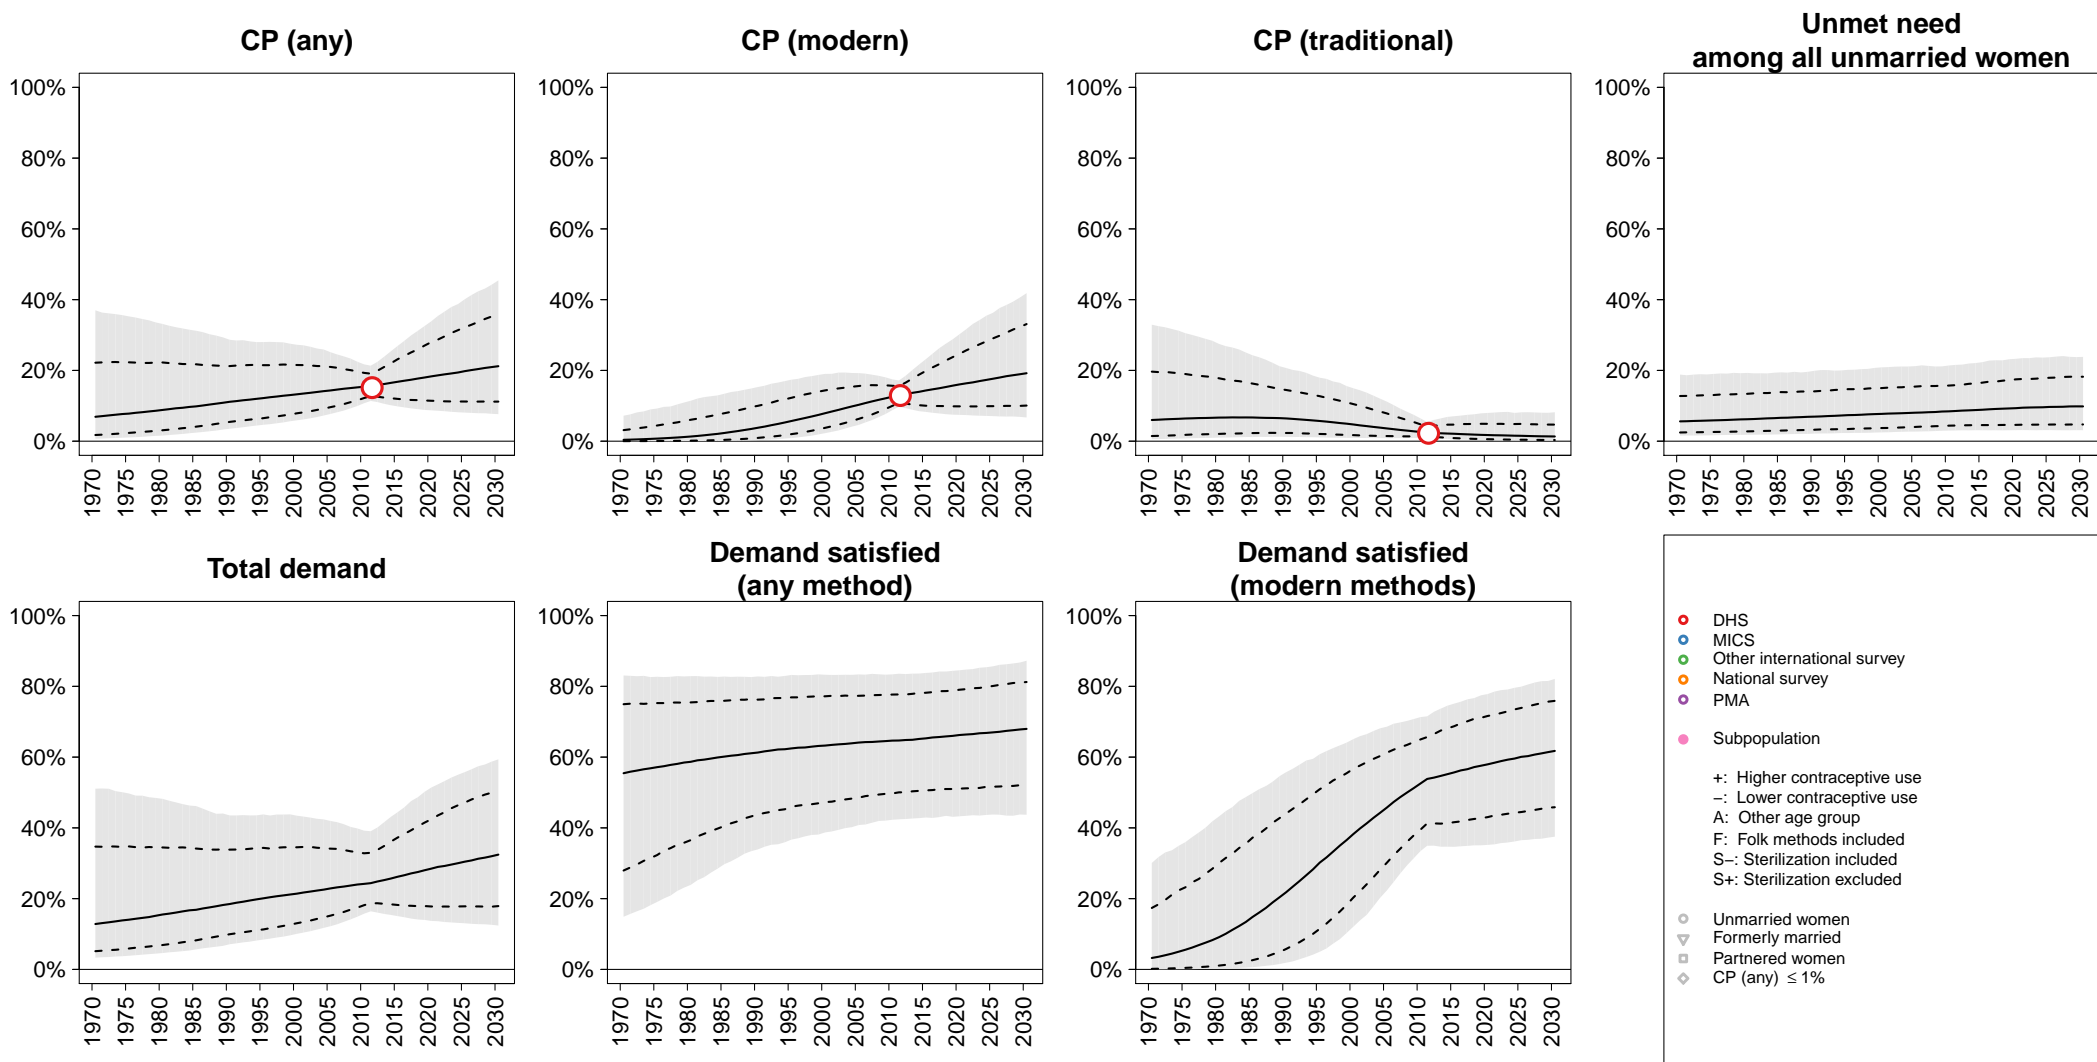

Eritrea (Eastern Africa, SA Group 1) --- Unmarried / Not In-Union

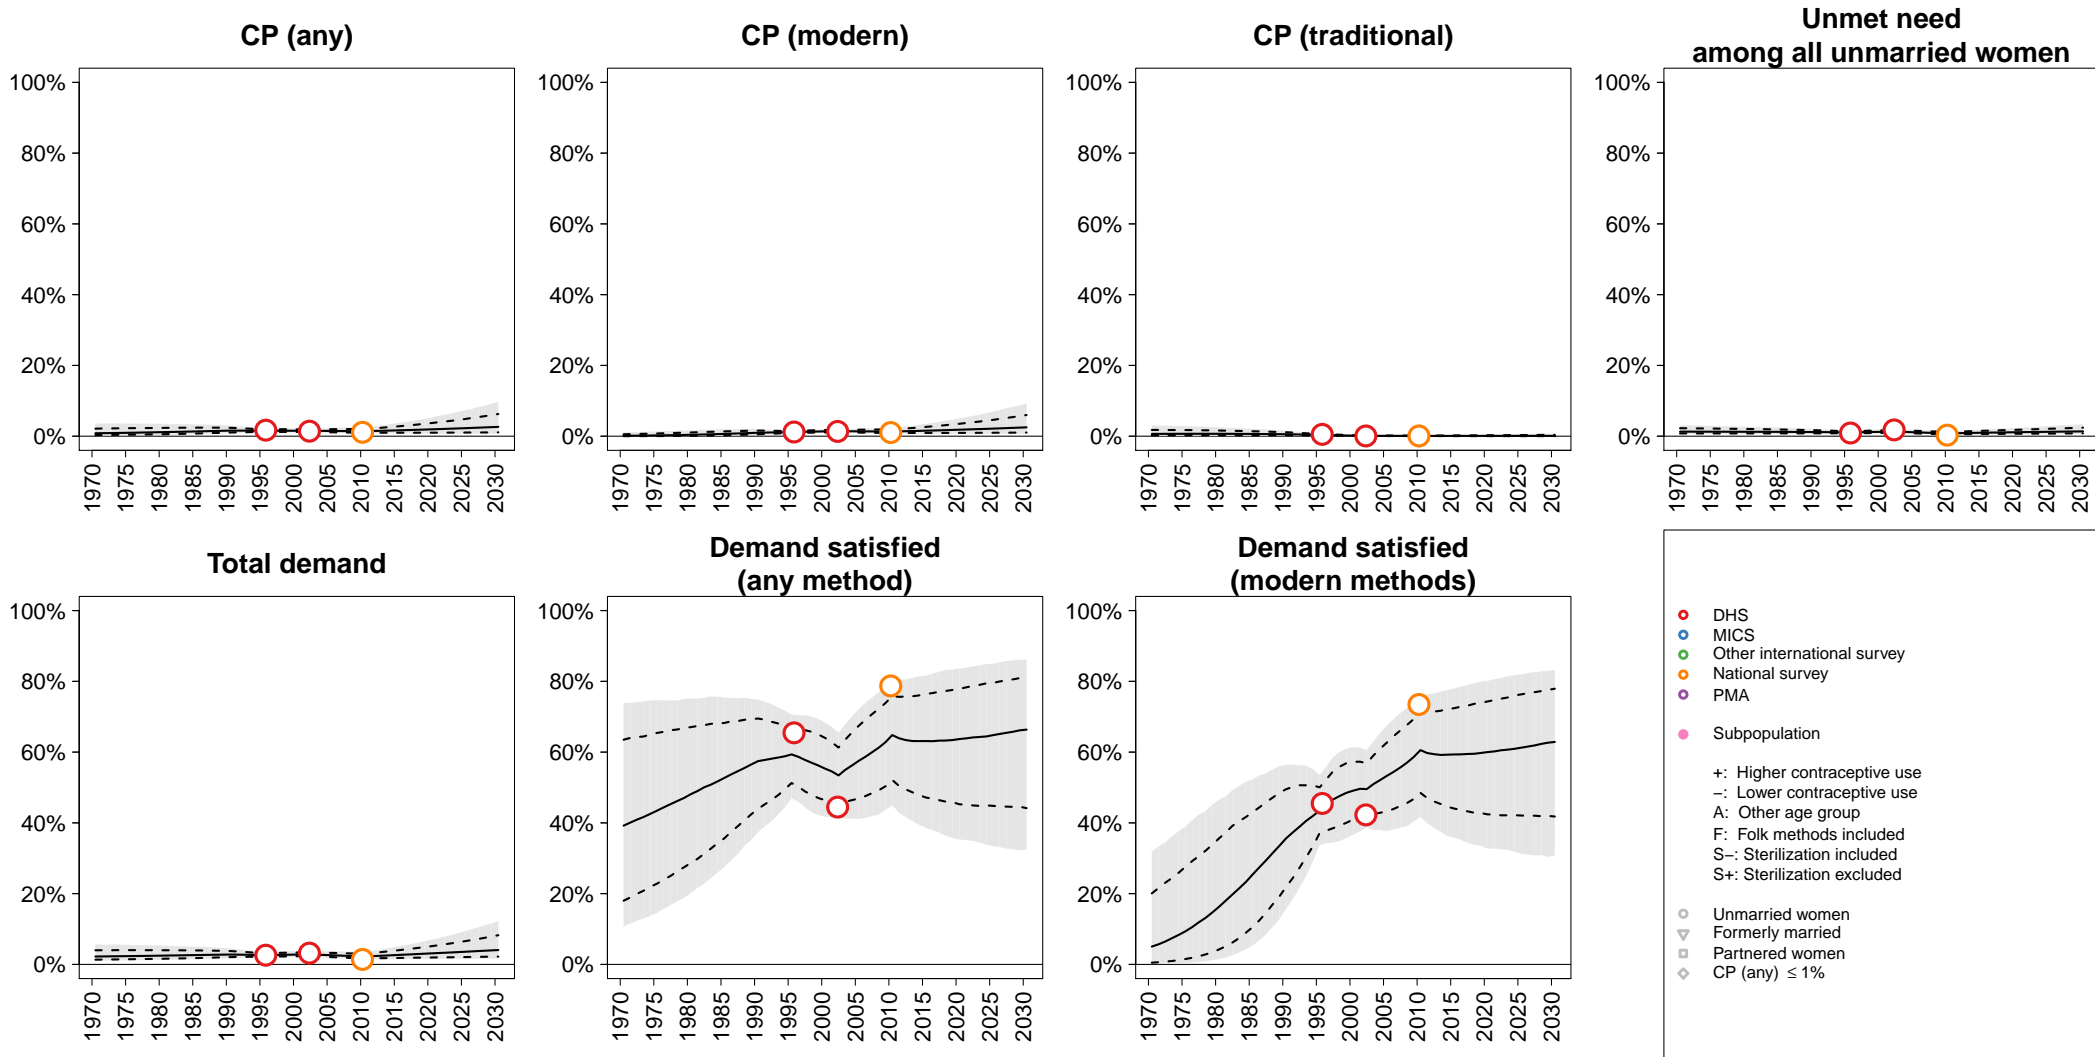

Estonia (Northern Europe, SA Group 1) --- Unmarried / Not In-Union

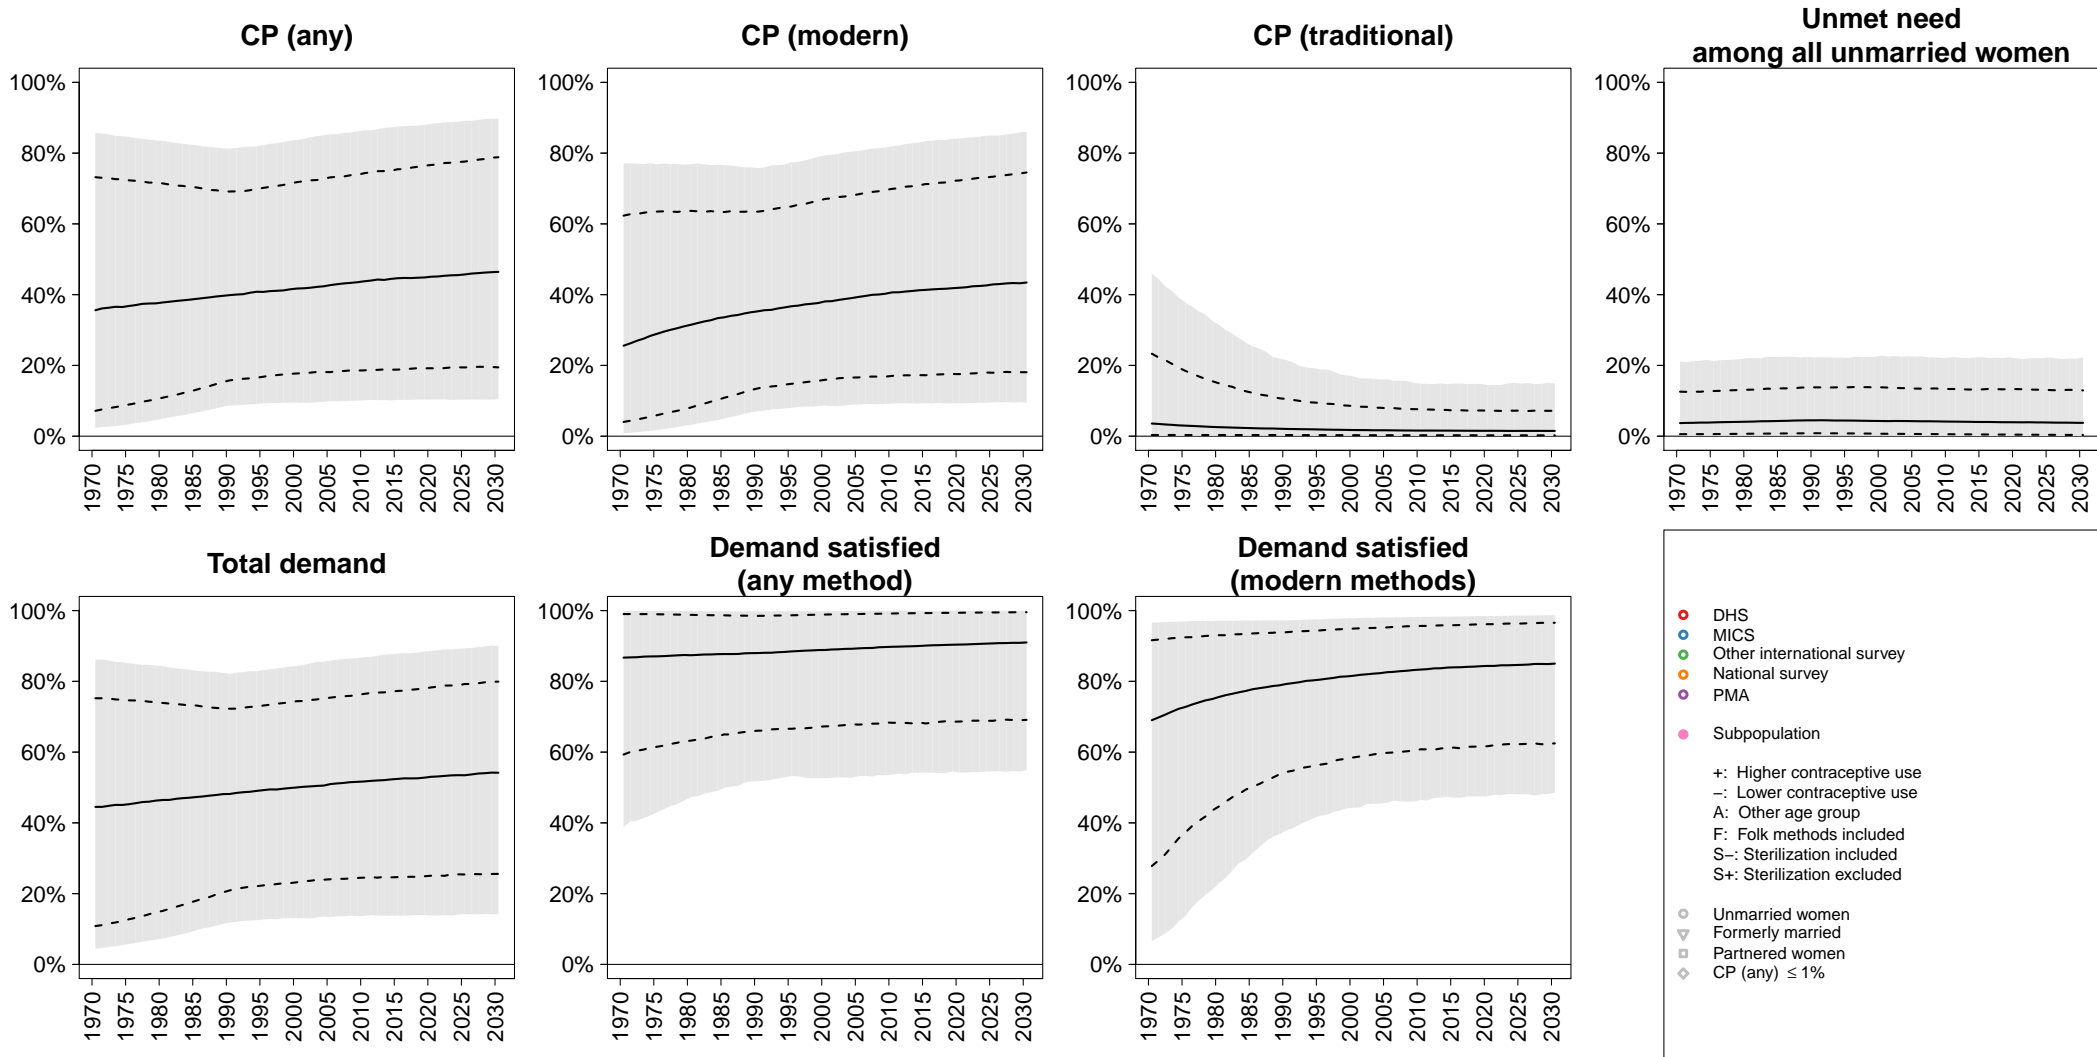

Eswatini (Southern Africa, SA Group 1) --- Unmarried / Not In-Union

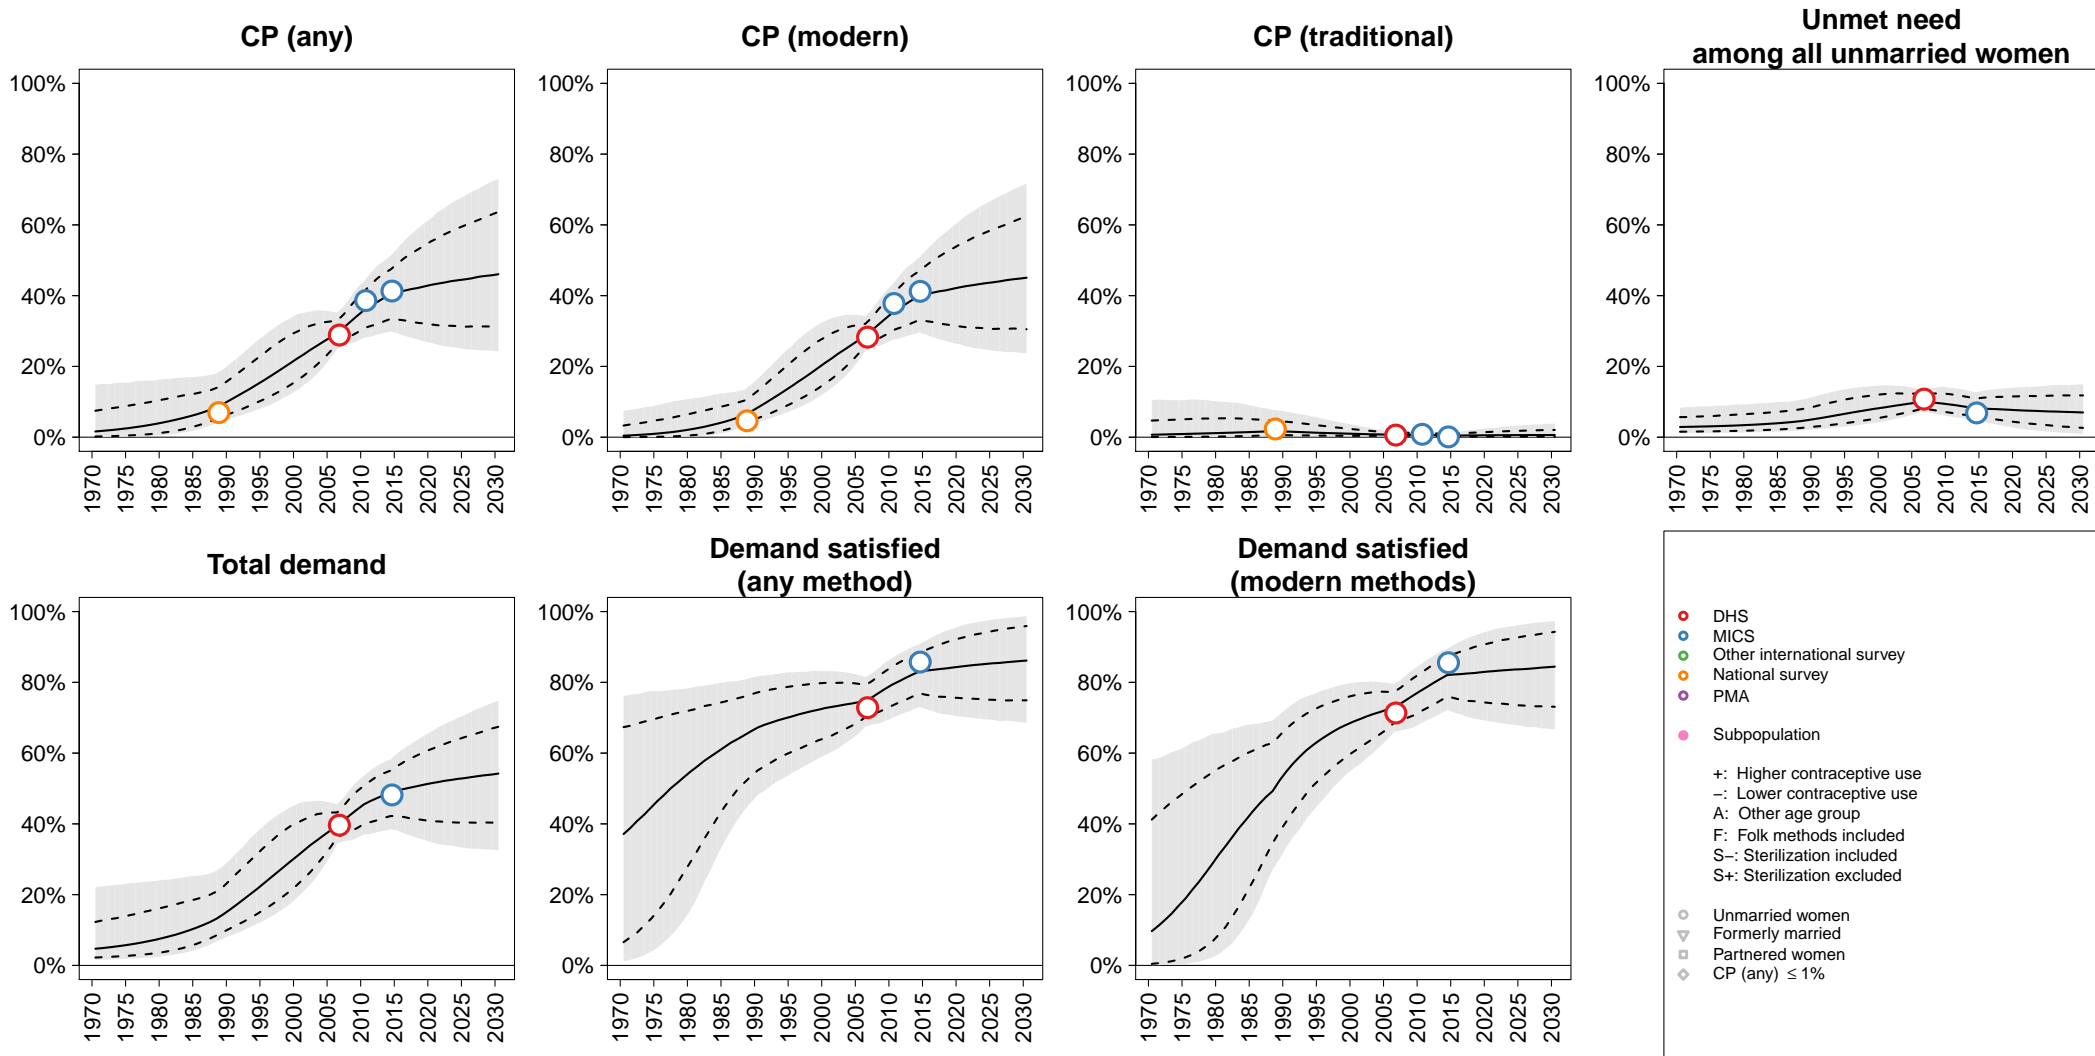

Ethiopia (Eastern Africa, SA Group 1) --- Unmarried / Not In-Union

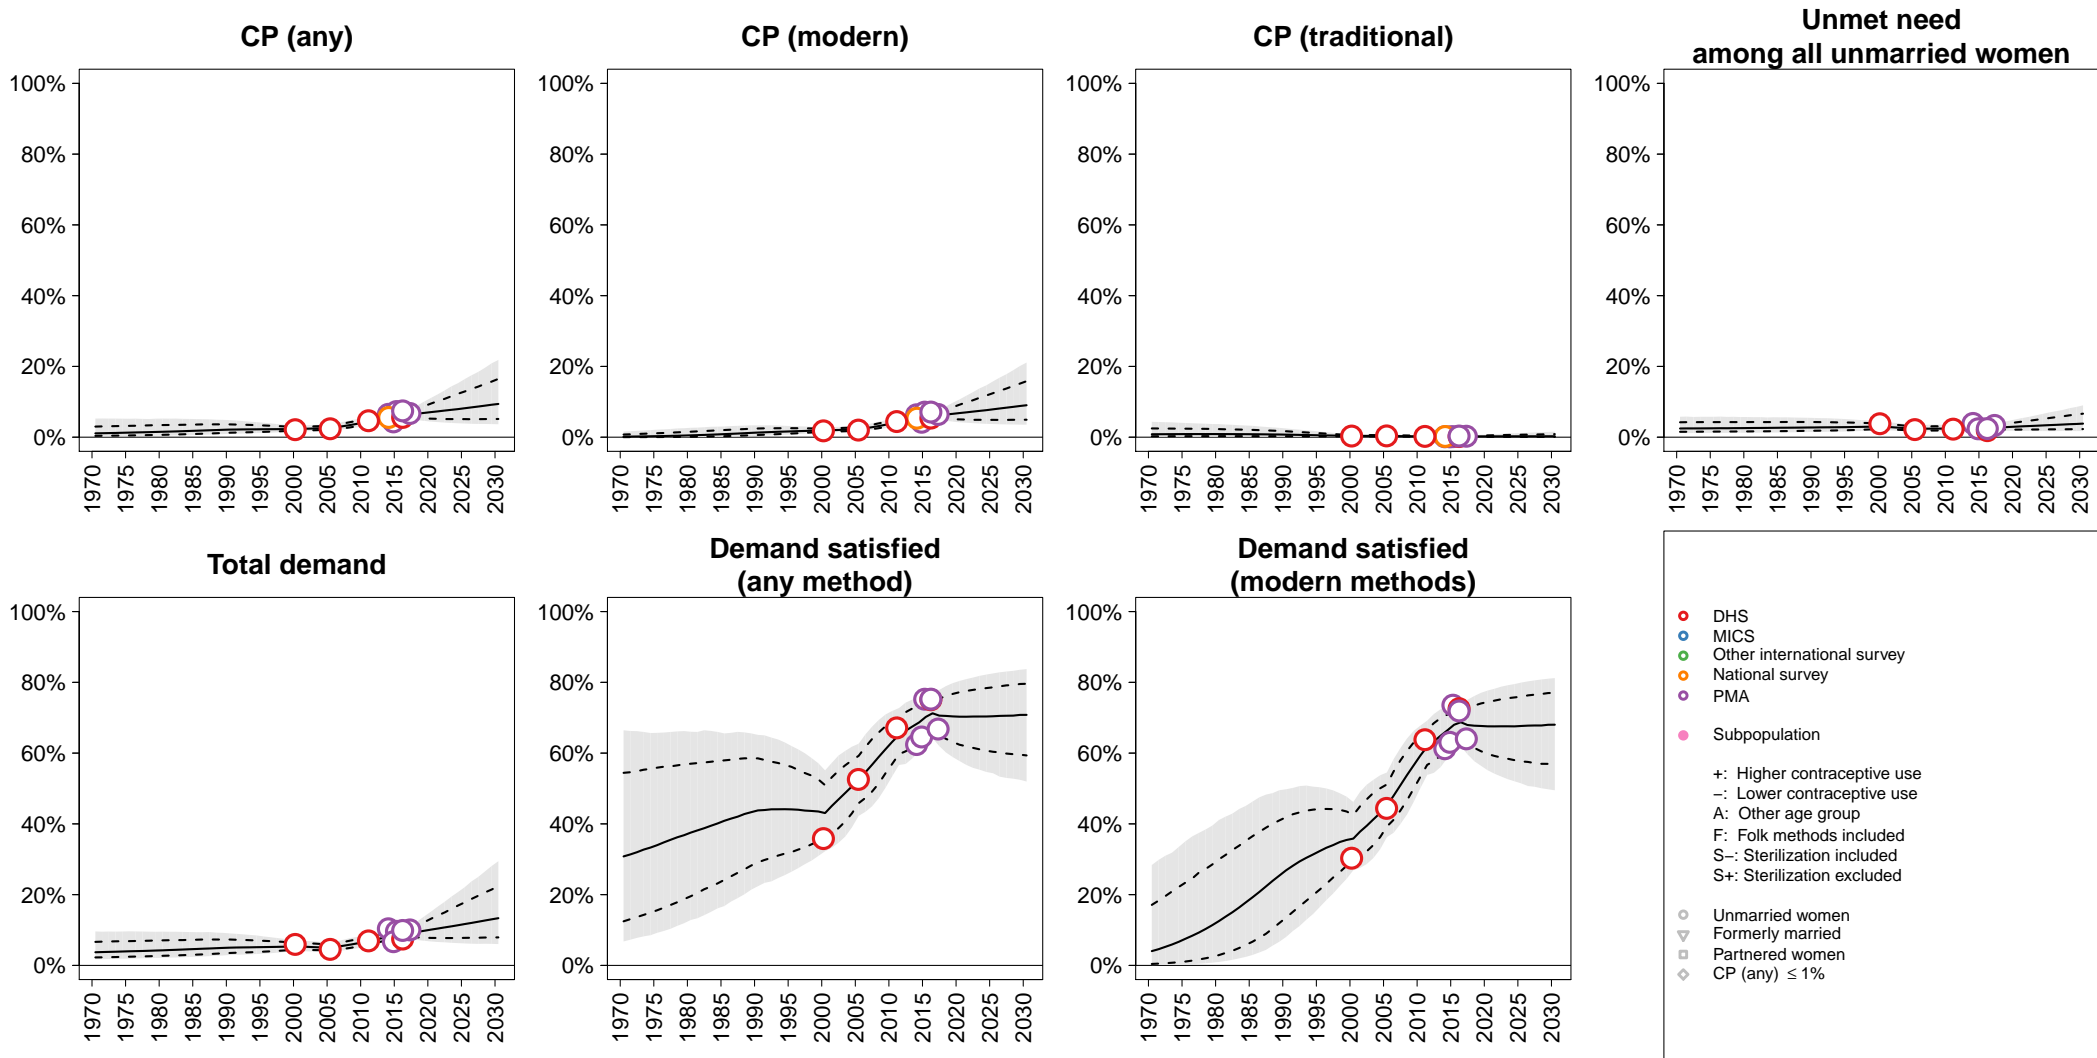

Fiji (Melanesia, SA Group 1) --- Unmarried / Not In-Union

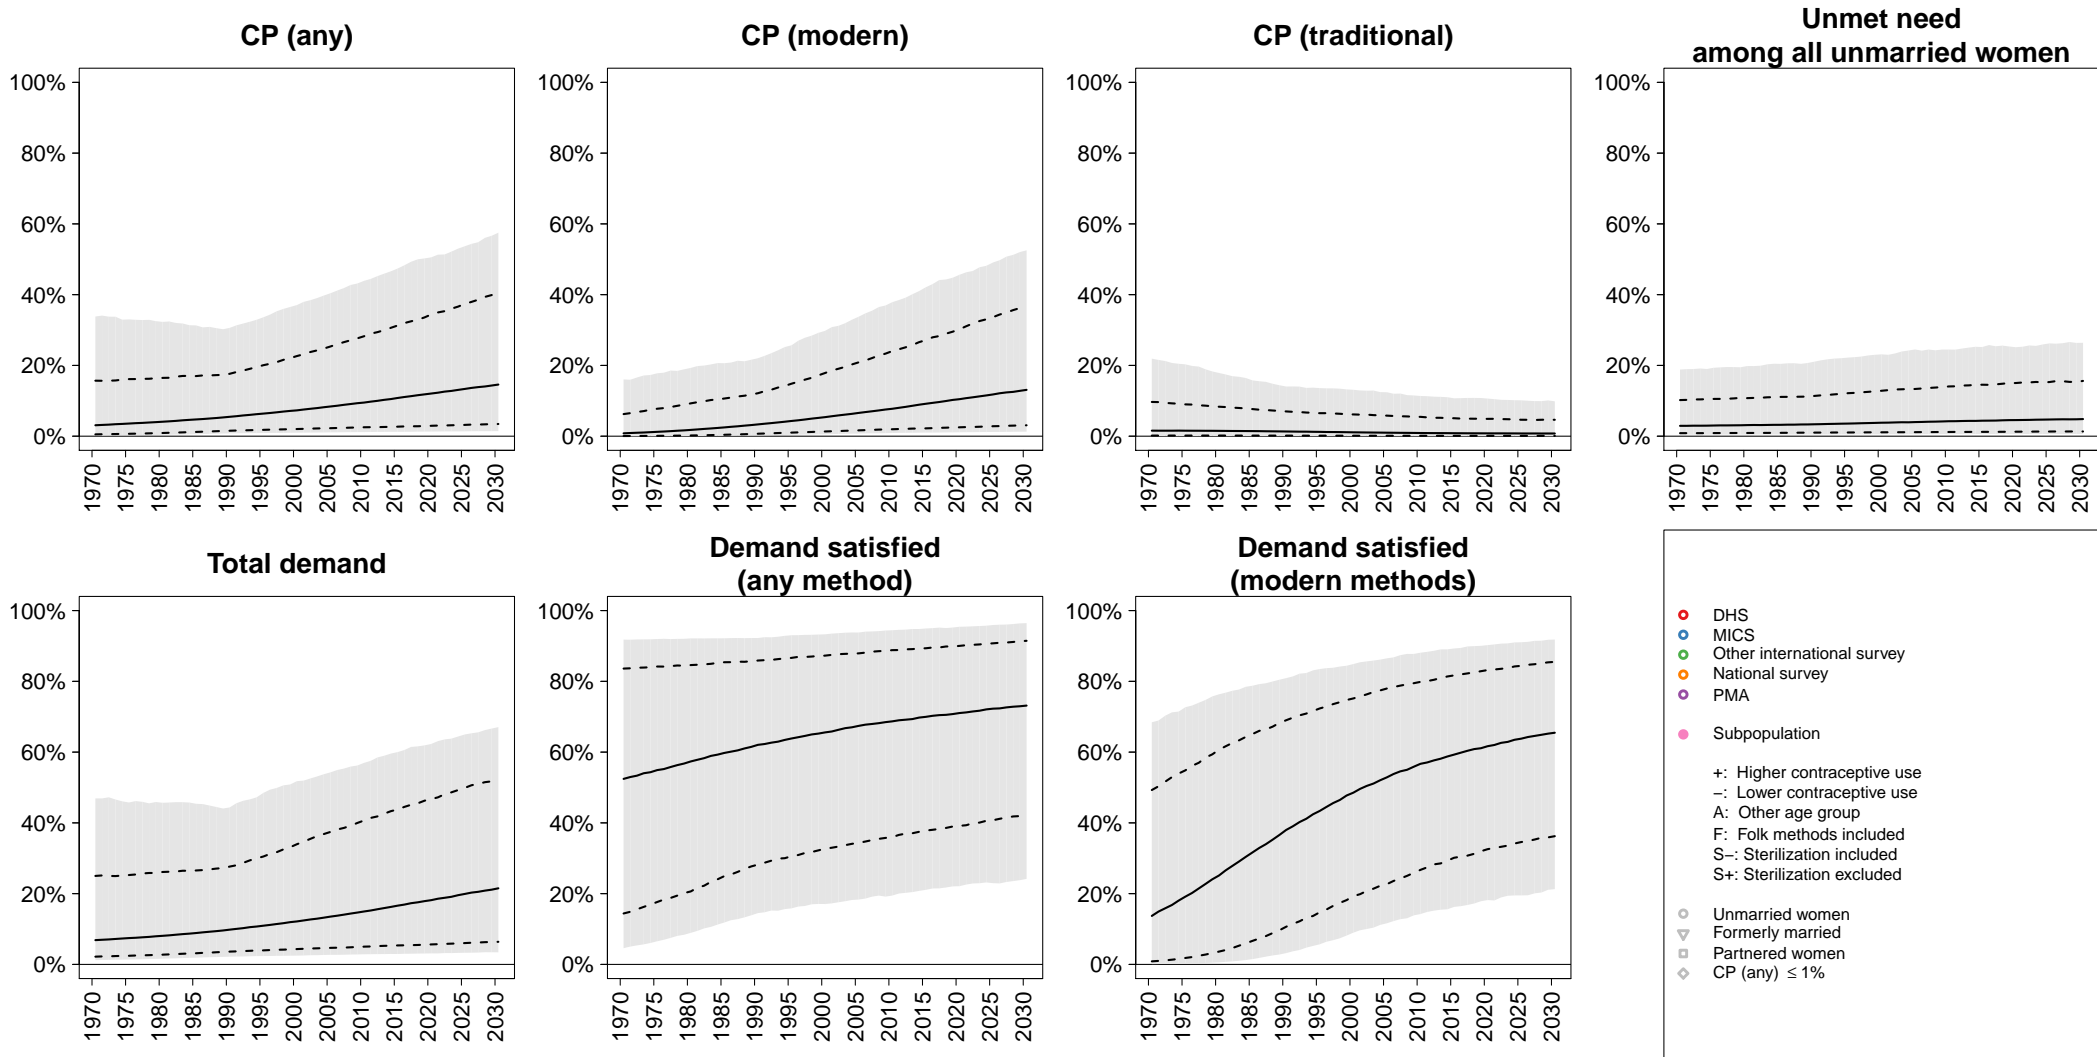

Finland (Northern Europe, SA Group 1) --- Unmarried / Not In-Union

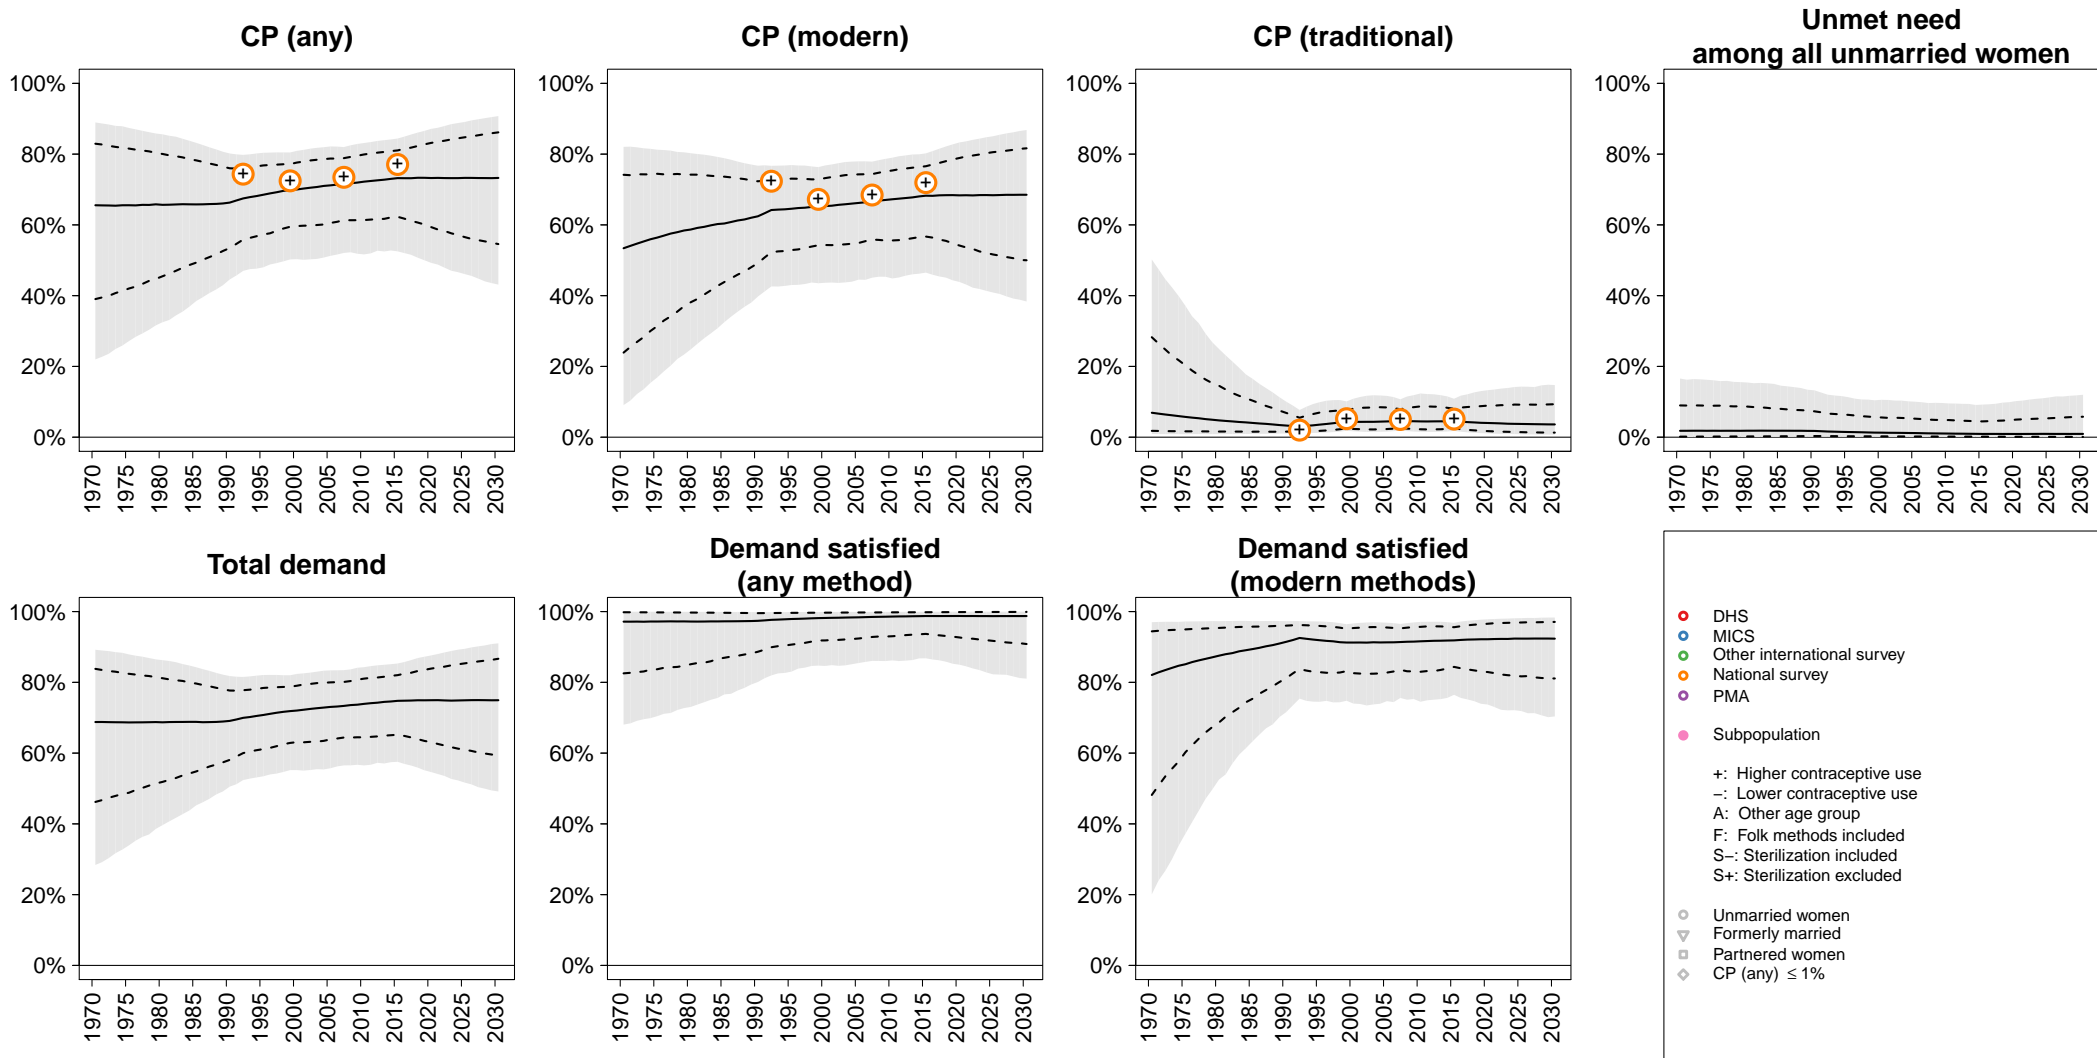

France (Western Europe, SA Group 1) --- Unmarried / Not In-Union

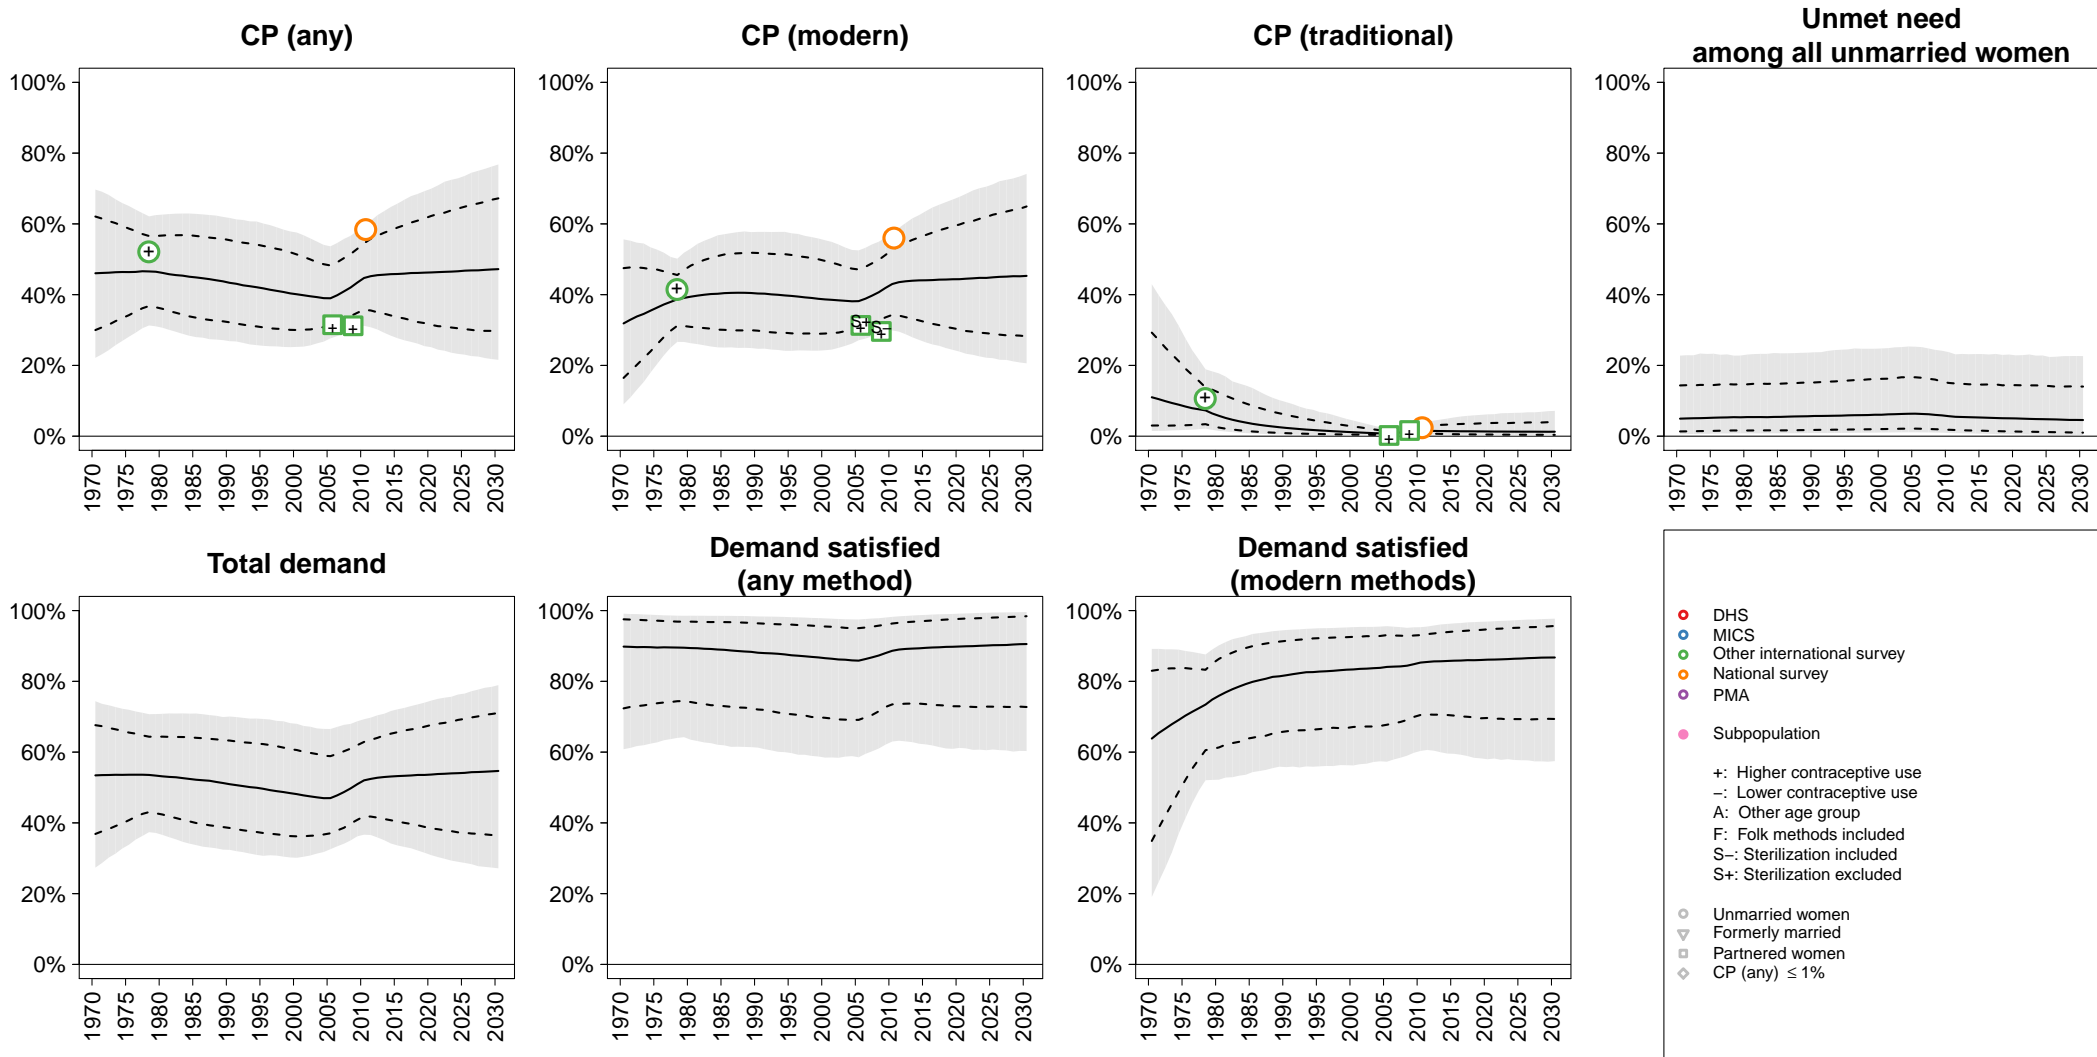



Gabon (Middle Africa, SA Group 1) --- Unmarried / Not In-Union

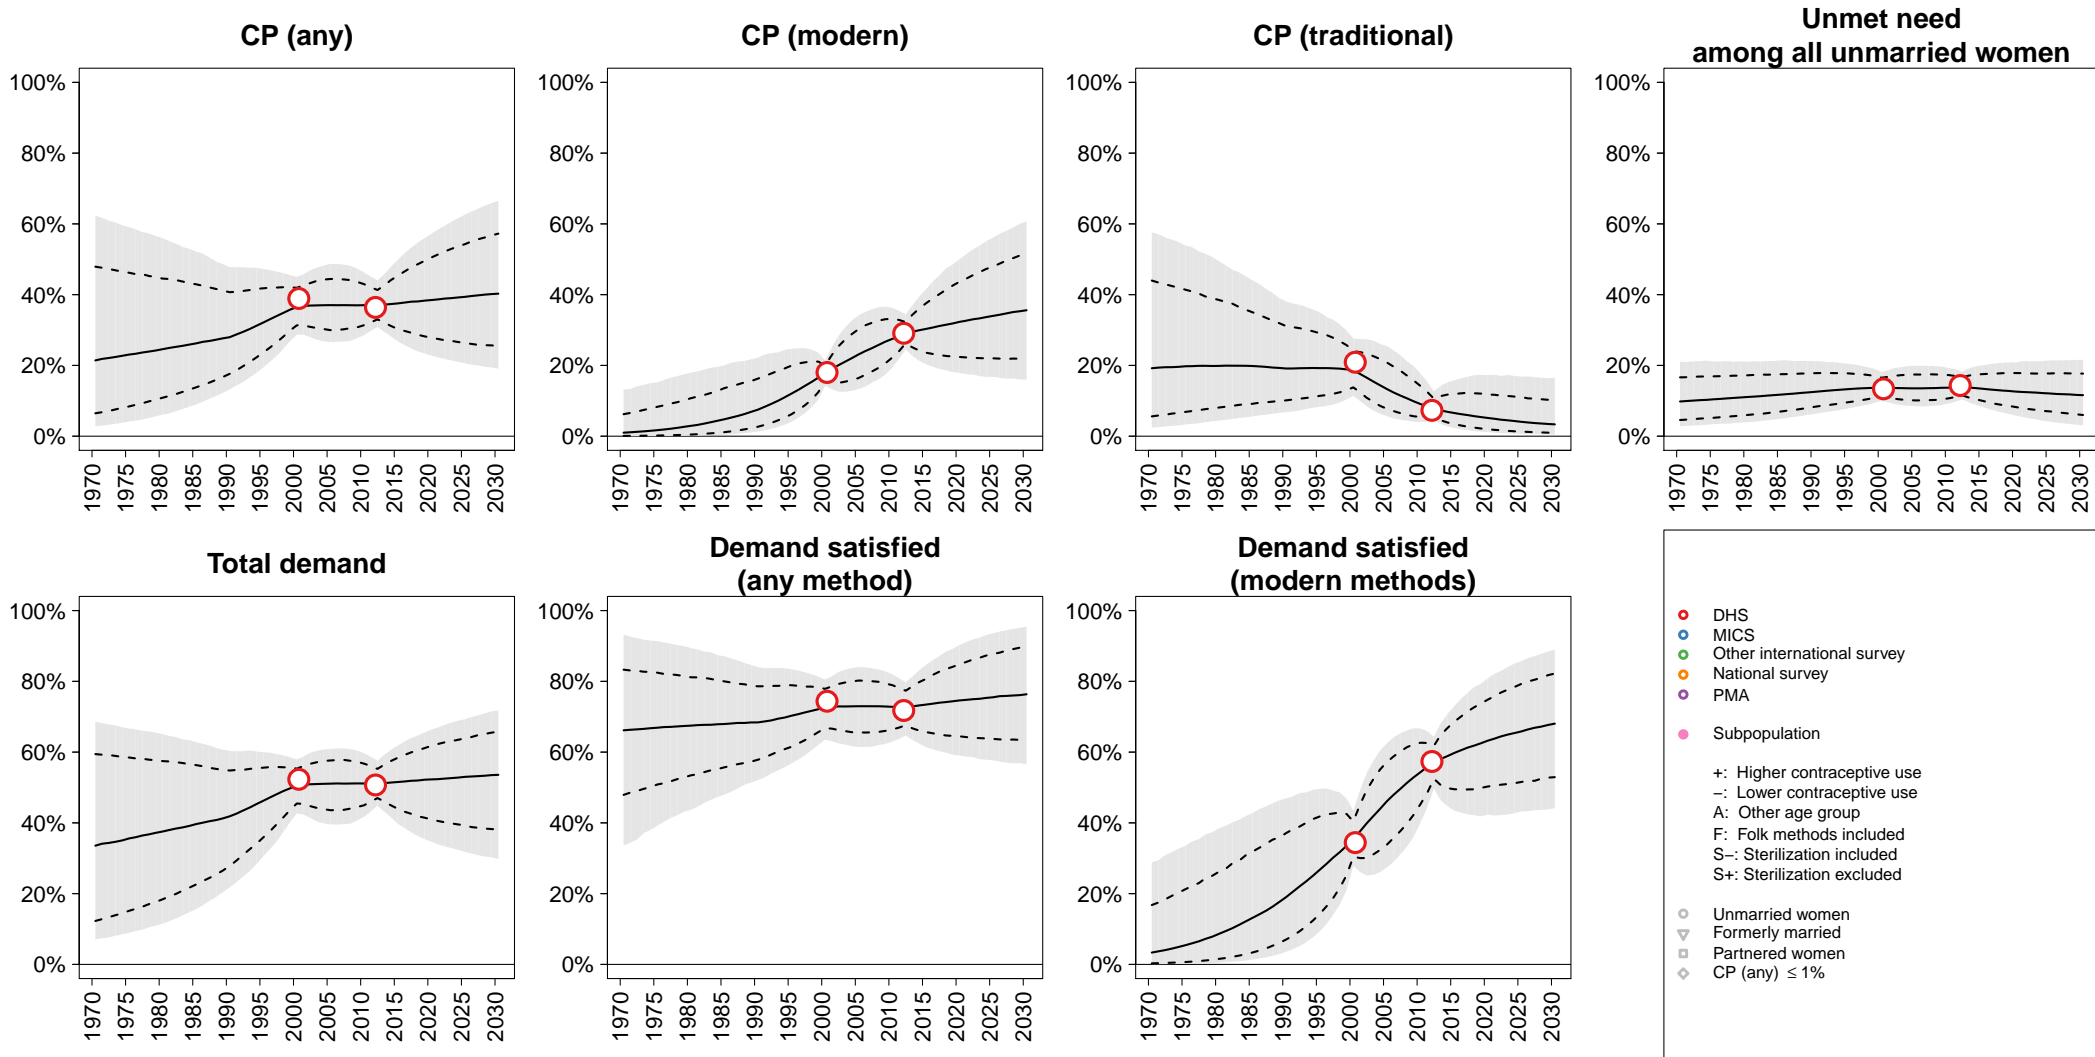

Gambia (Western Africa, SA Group 1) --- Unmarried / Not In-Union

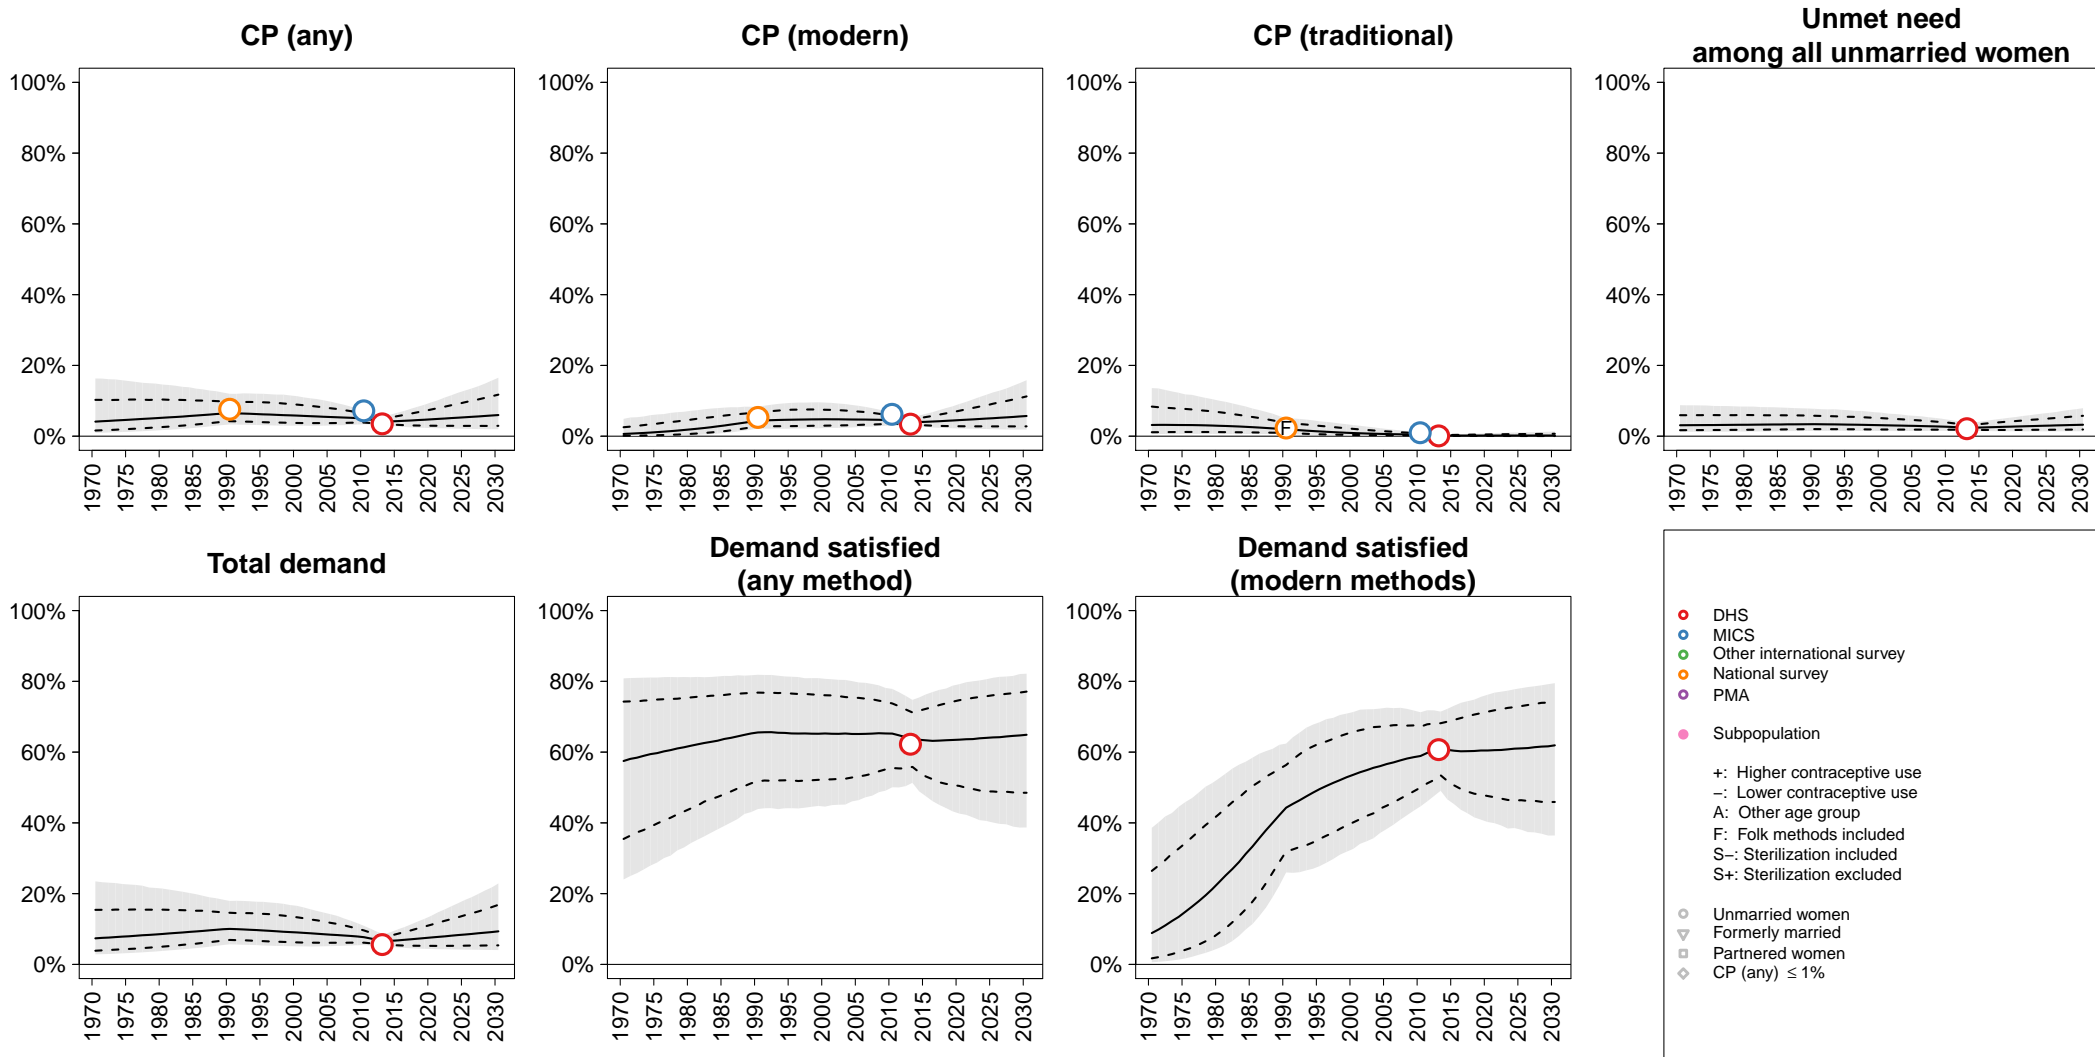

Georgia (Western Asia, SA Group 1) --- Unmarried / Not In-Union

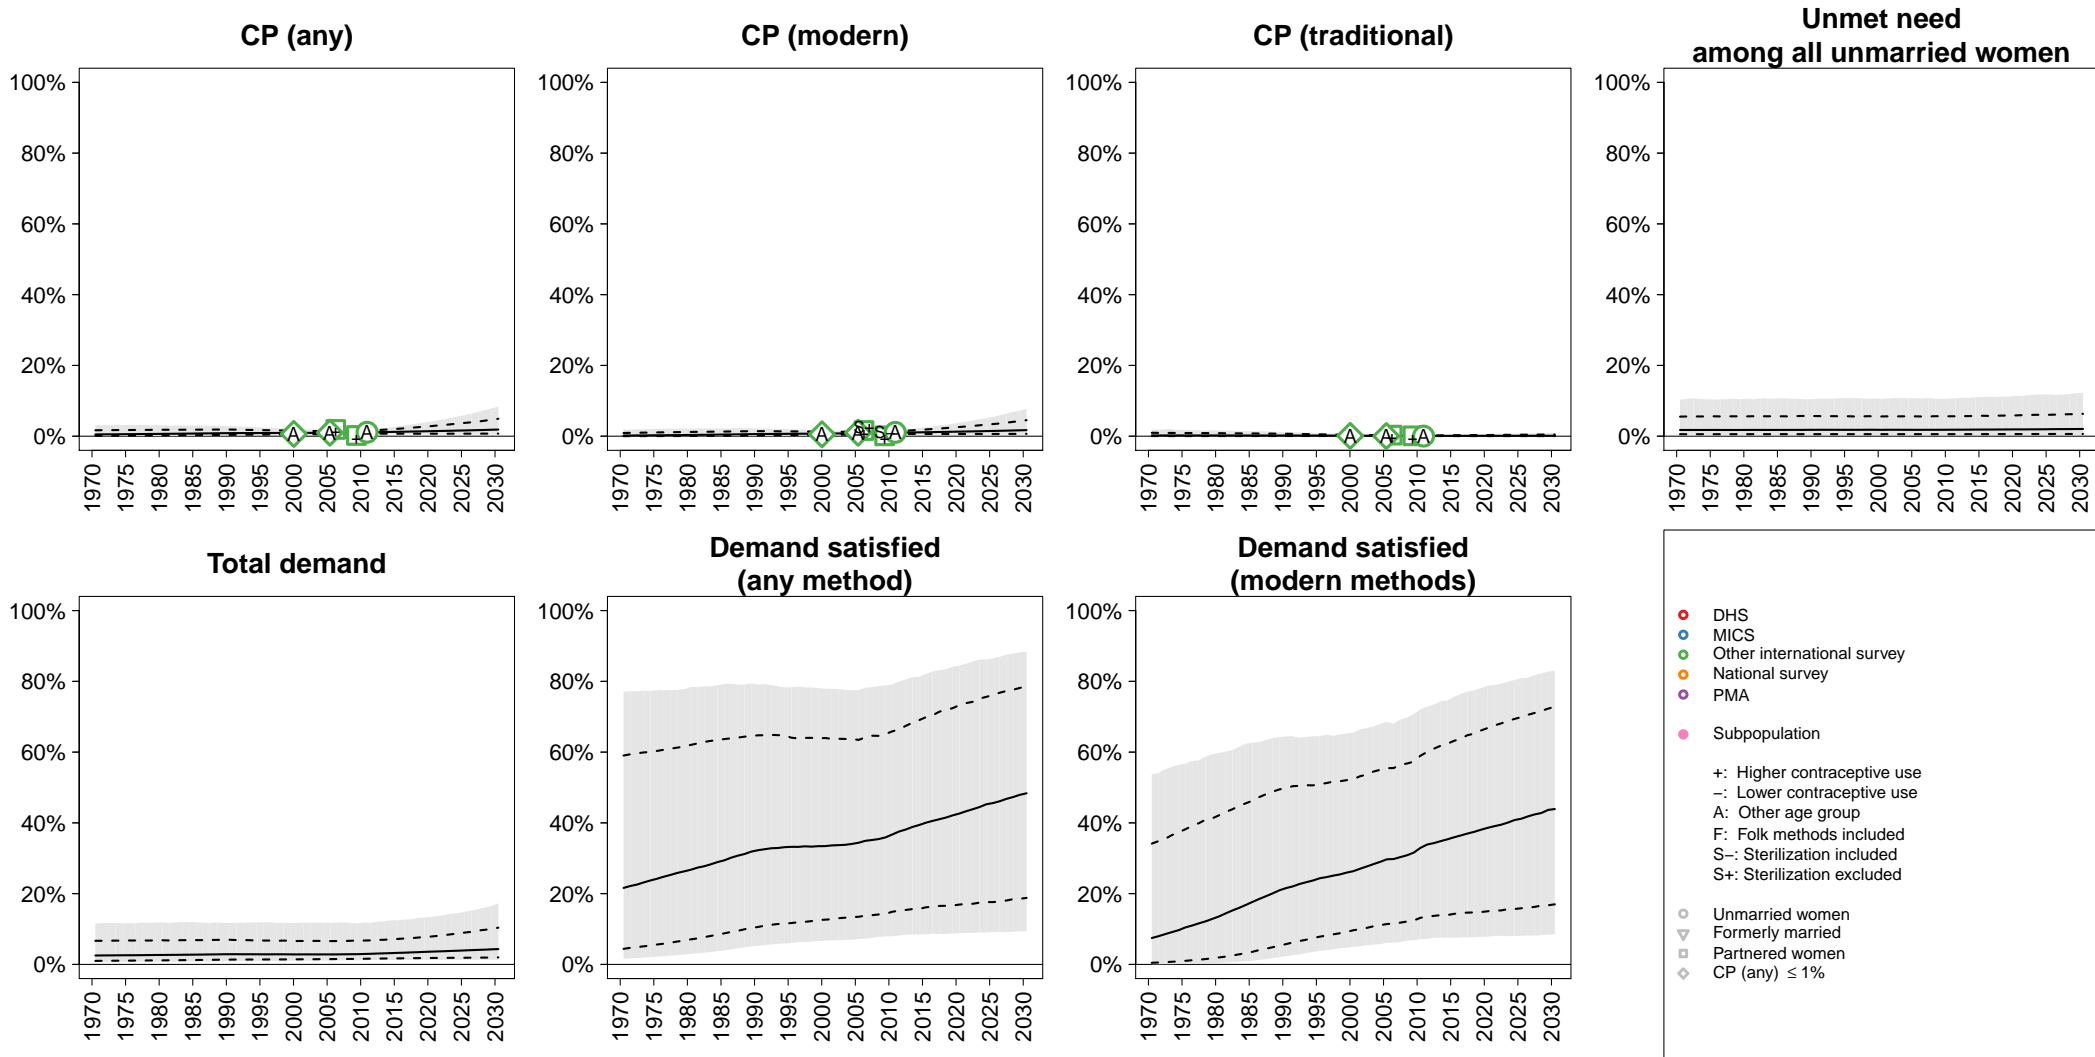

Germany (Western Europe, SA Group 1) --- Unmarried / Not In-Union

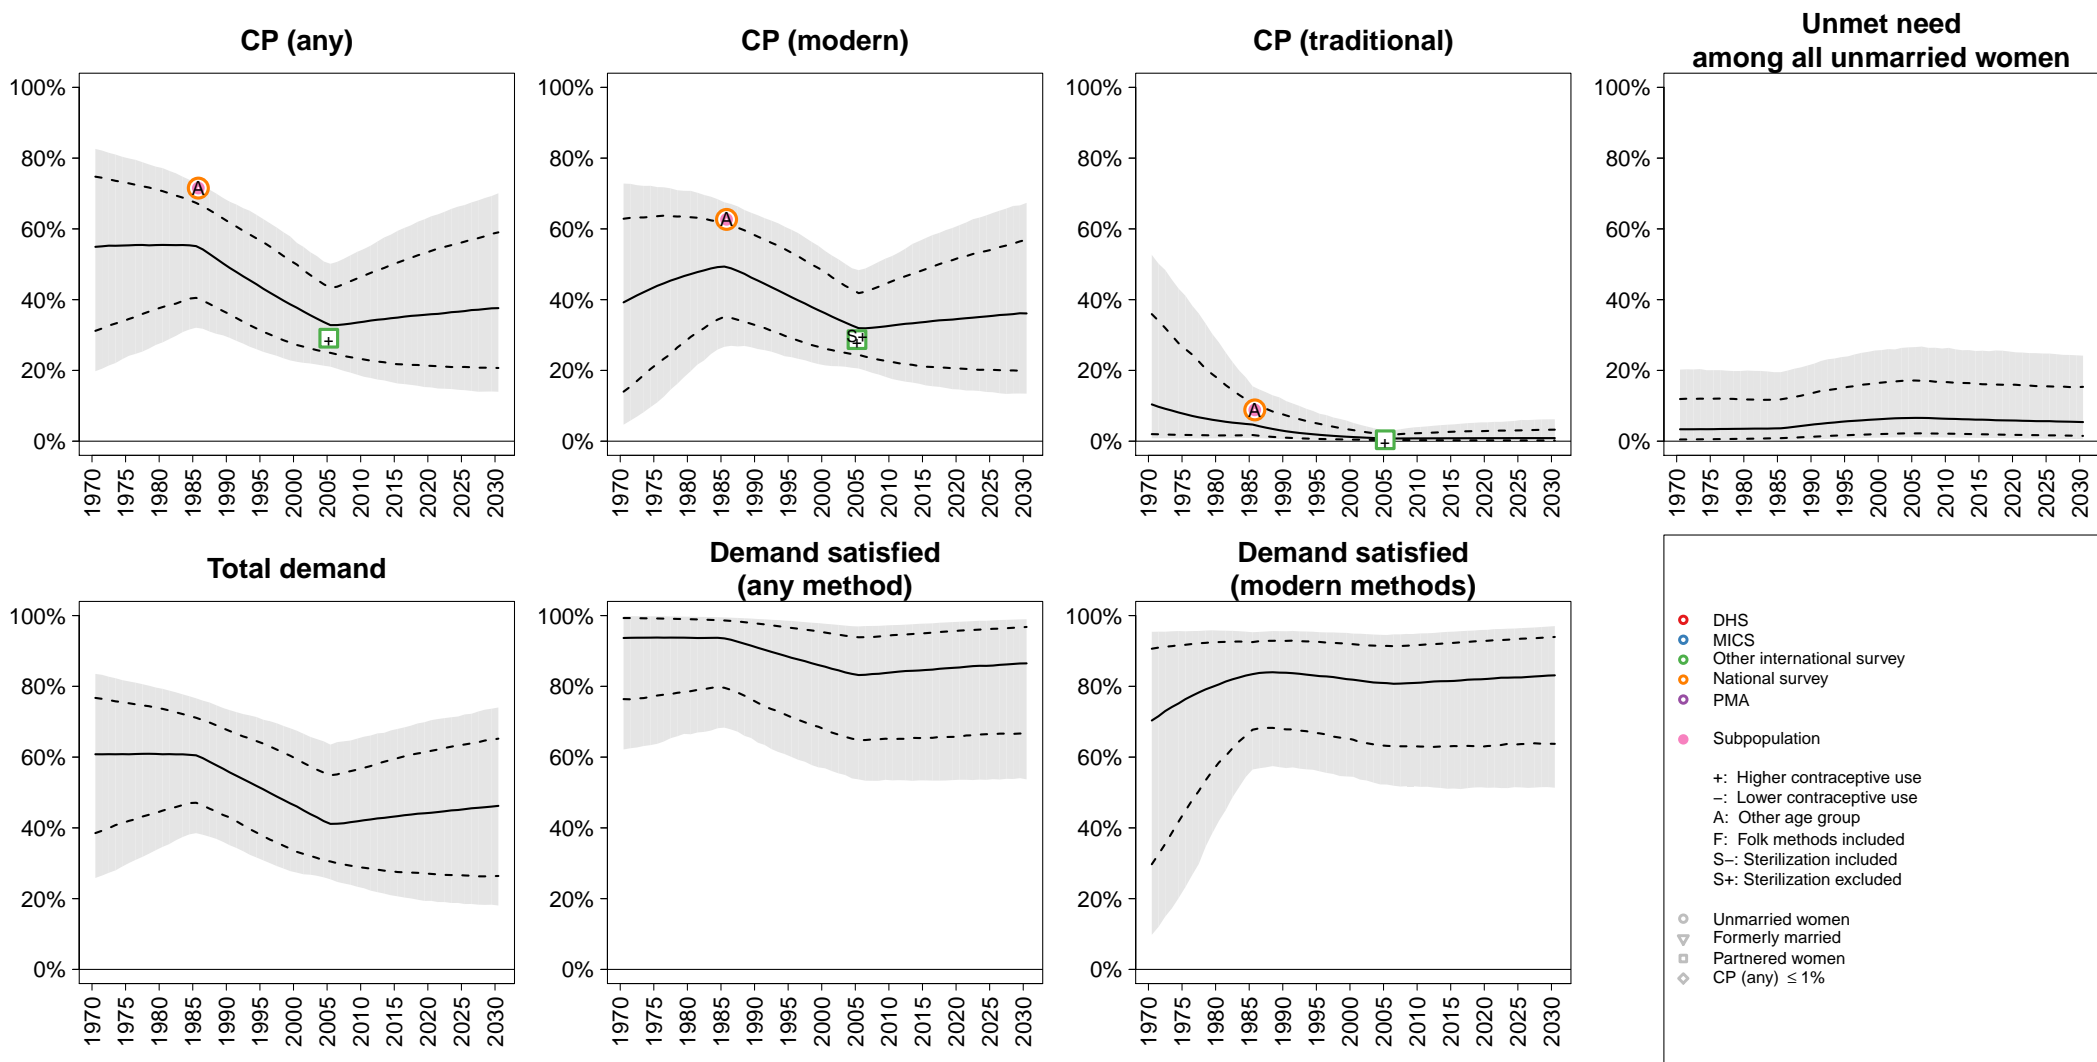

Ghana (Western Africa, SA Group 1) --- Unmarried / Not In-Union

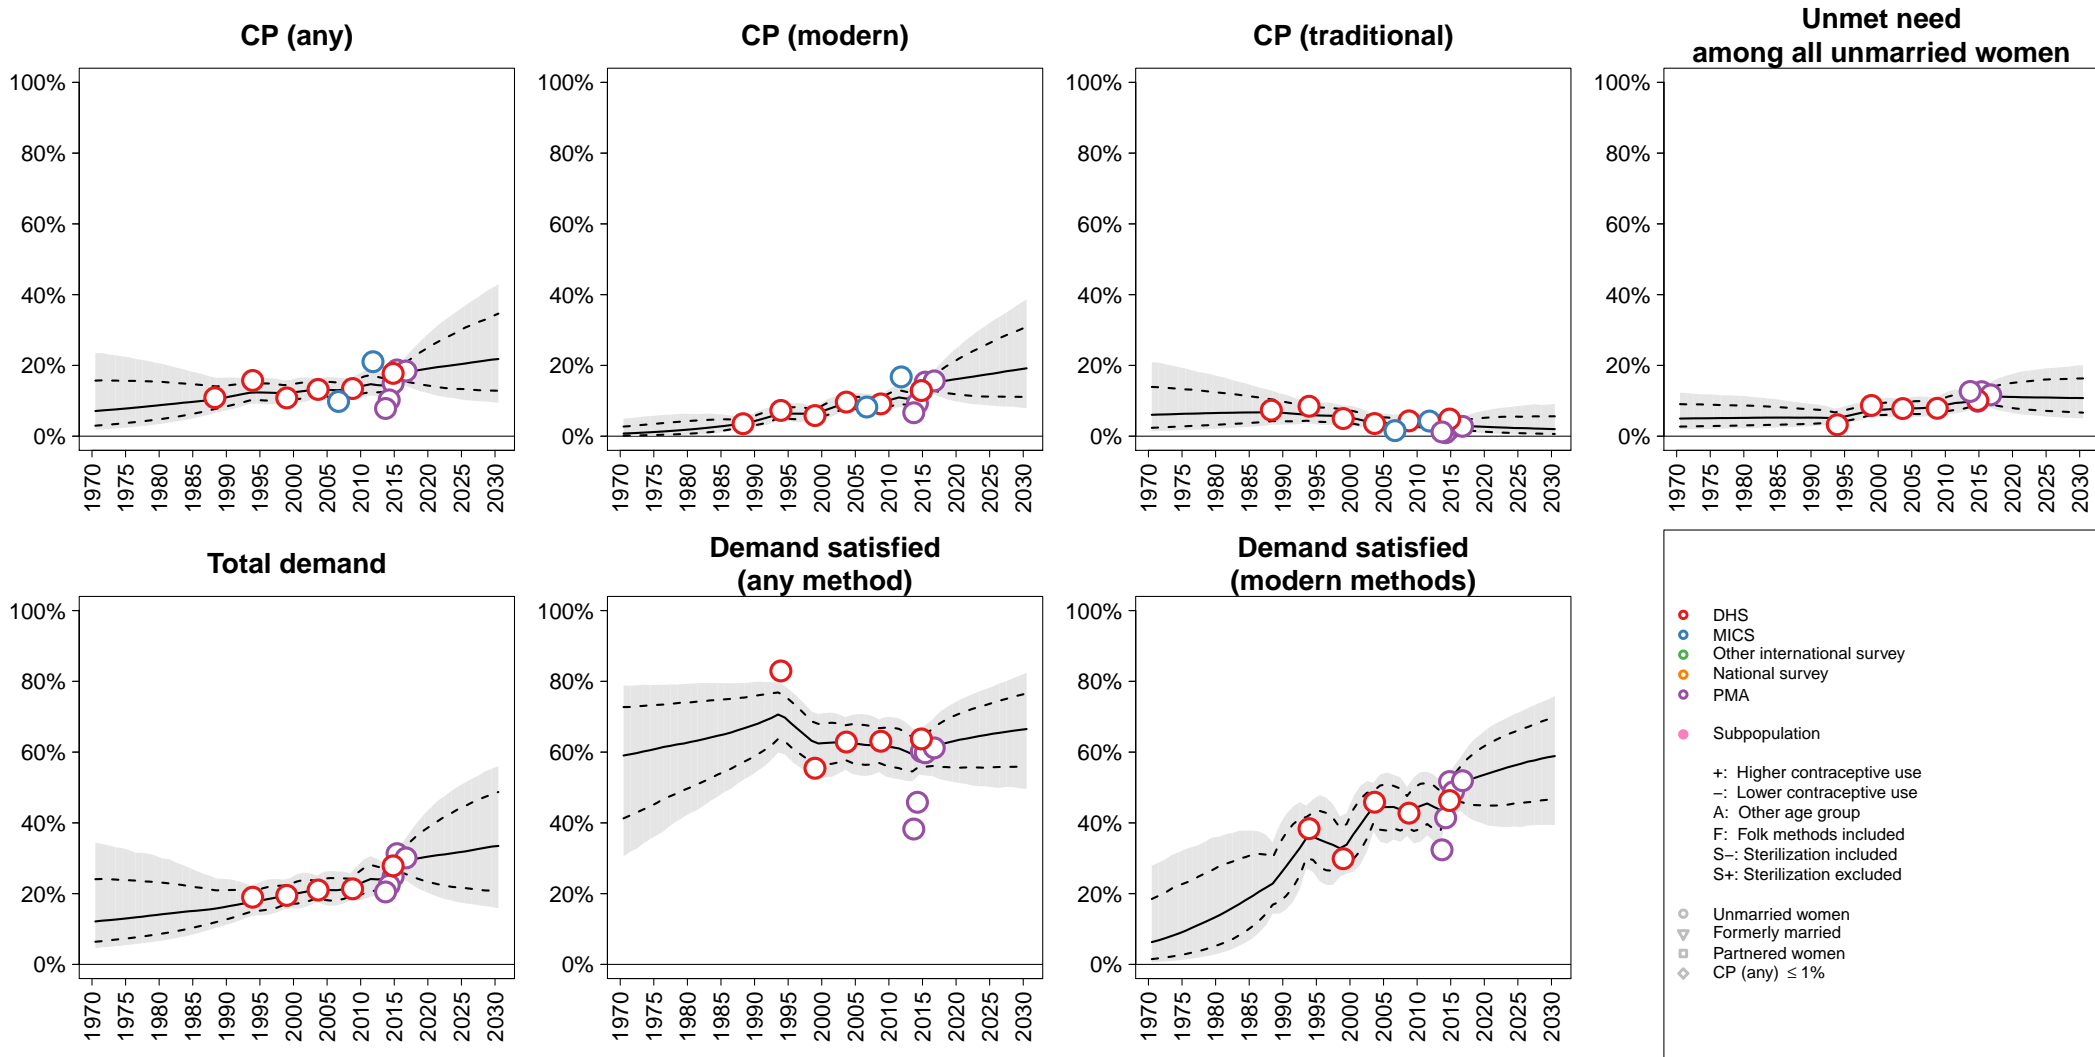

Greece (Southern Europe, SA Group 1) --- Unmarried / Not In-Union

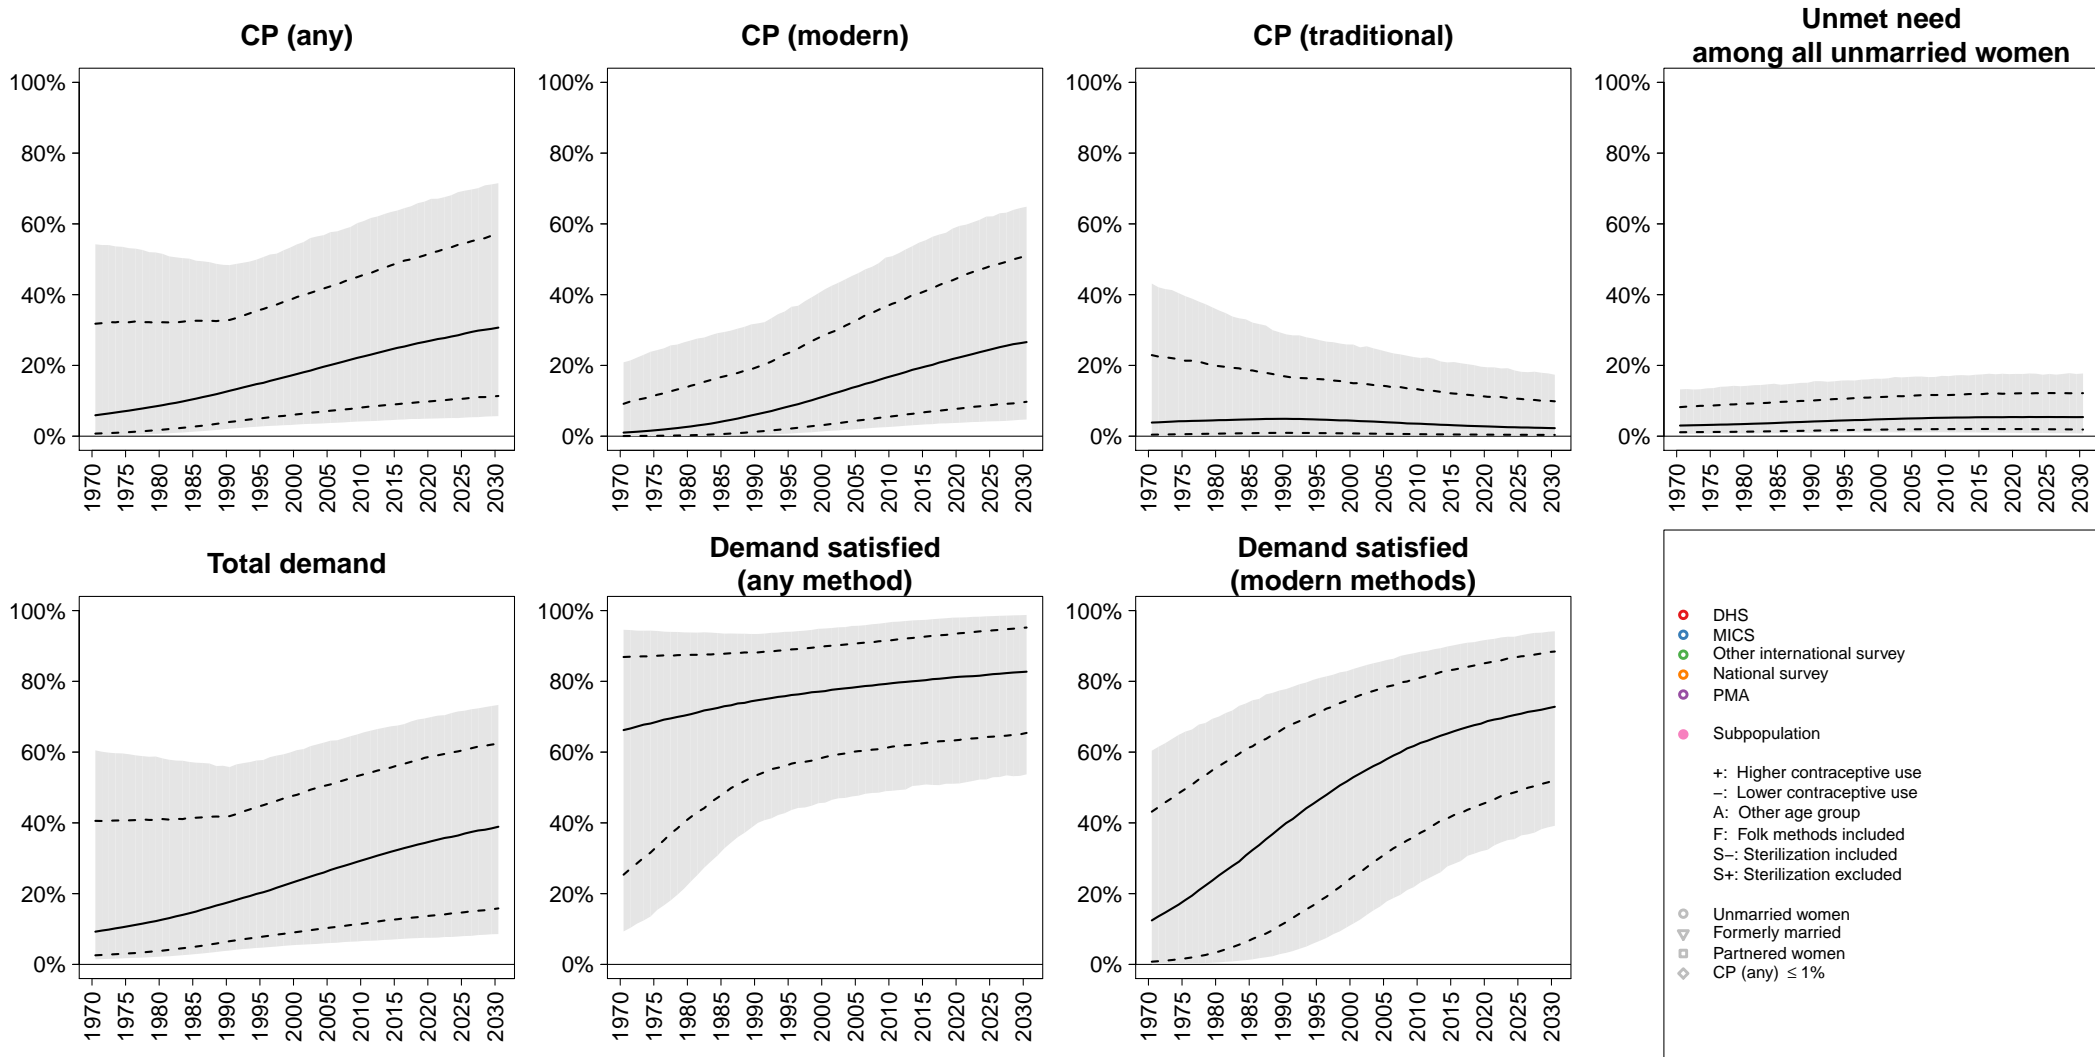

Grenada (Caribbean, SA Group 1) --- Unmarried / Not In-Union

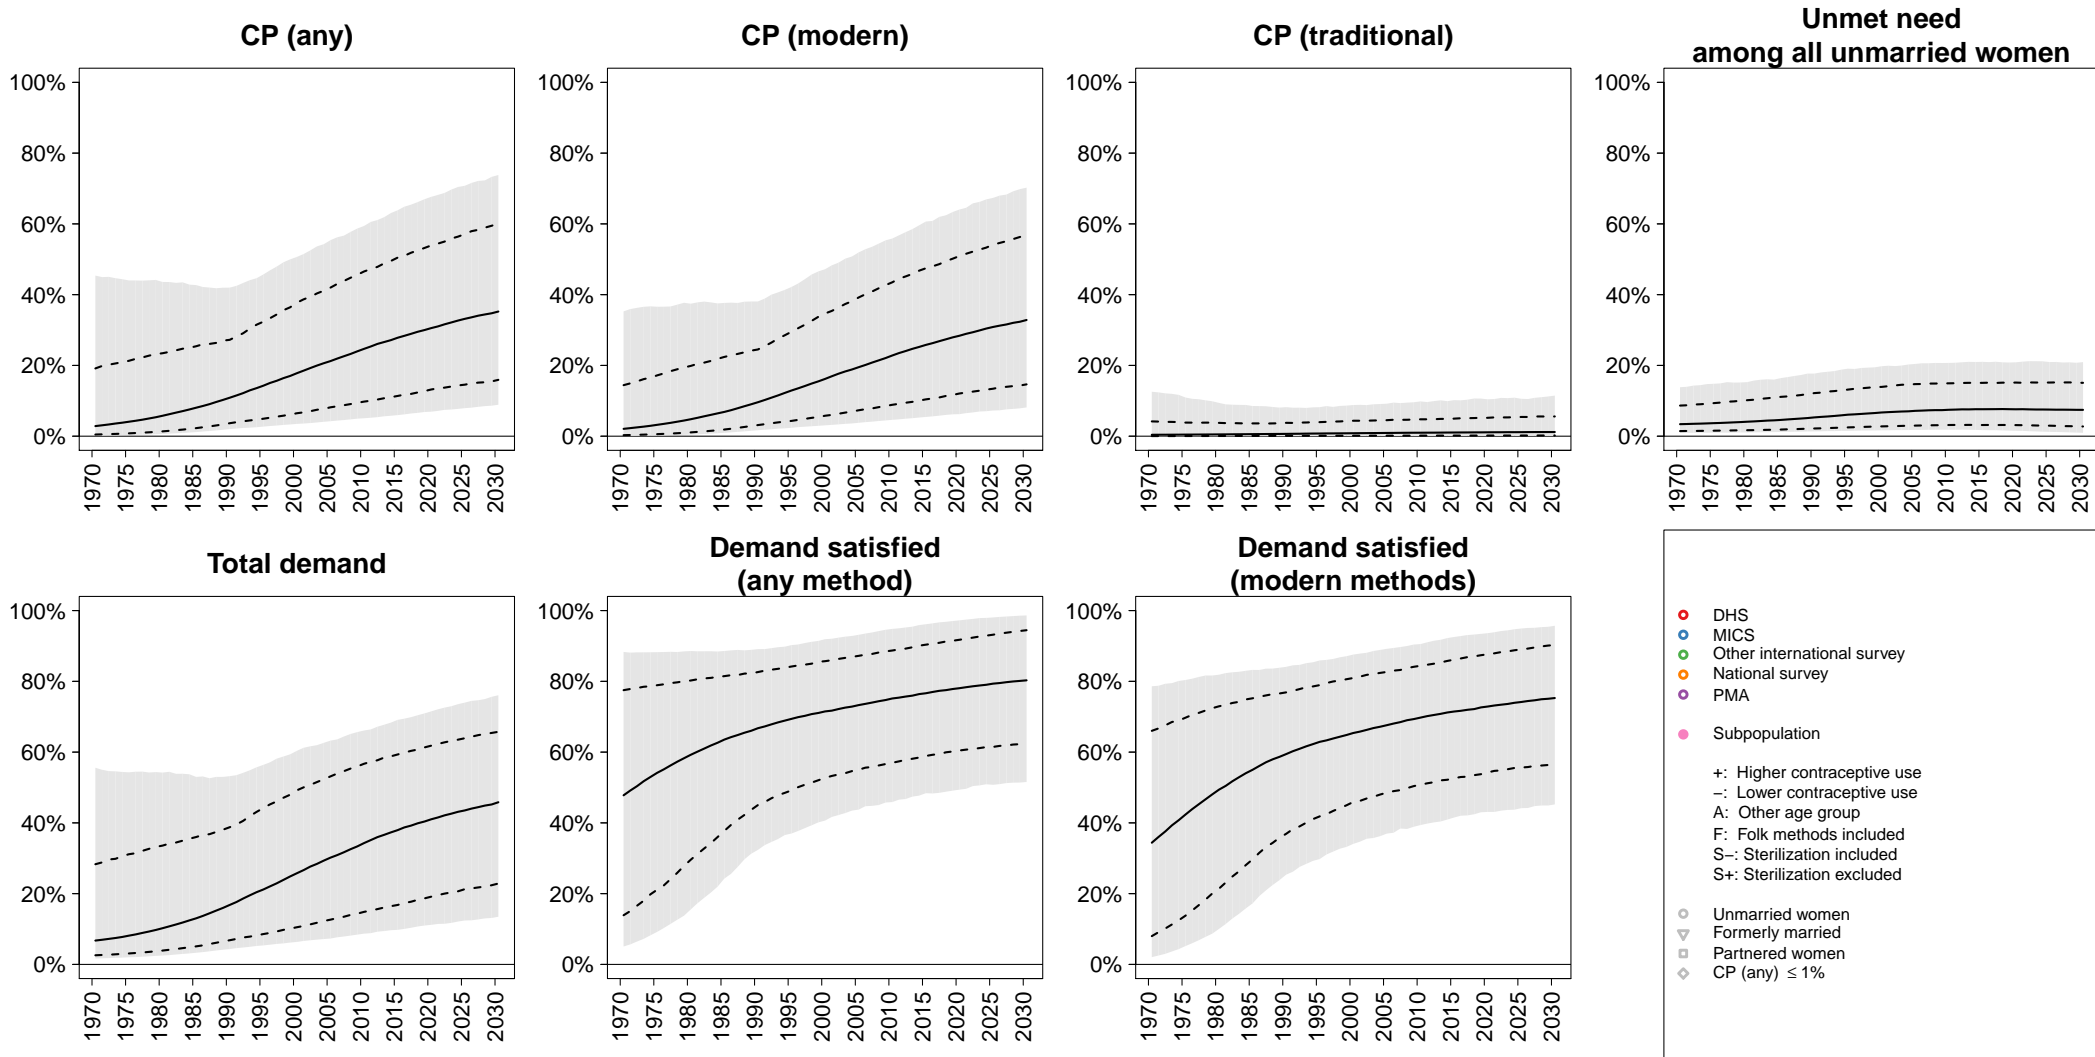

Guadeloupe (Caribbean, SA Group 1) --- Unmarried / Not In-Union

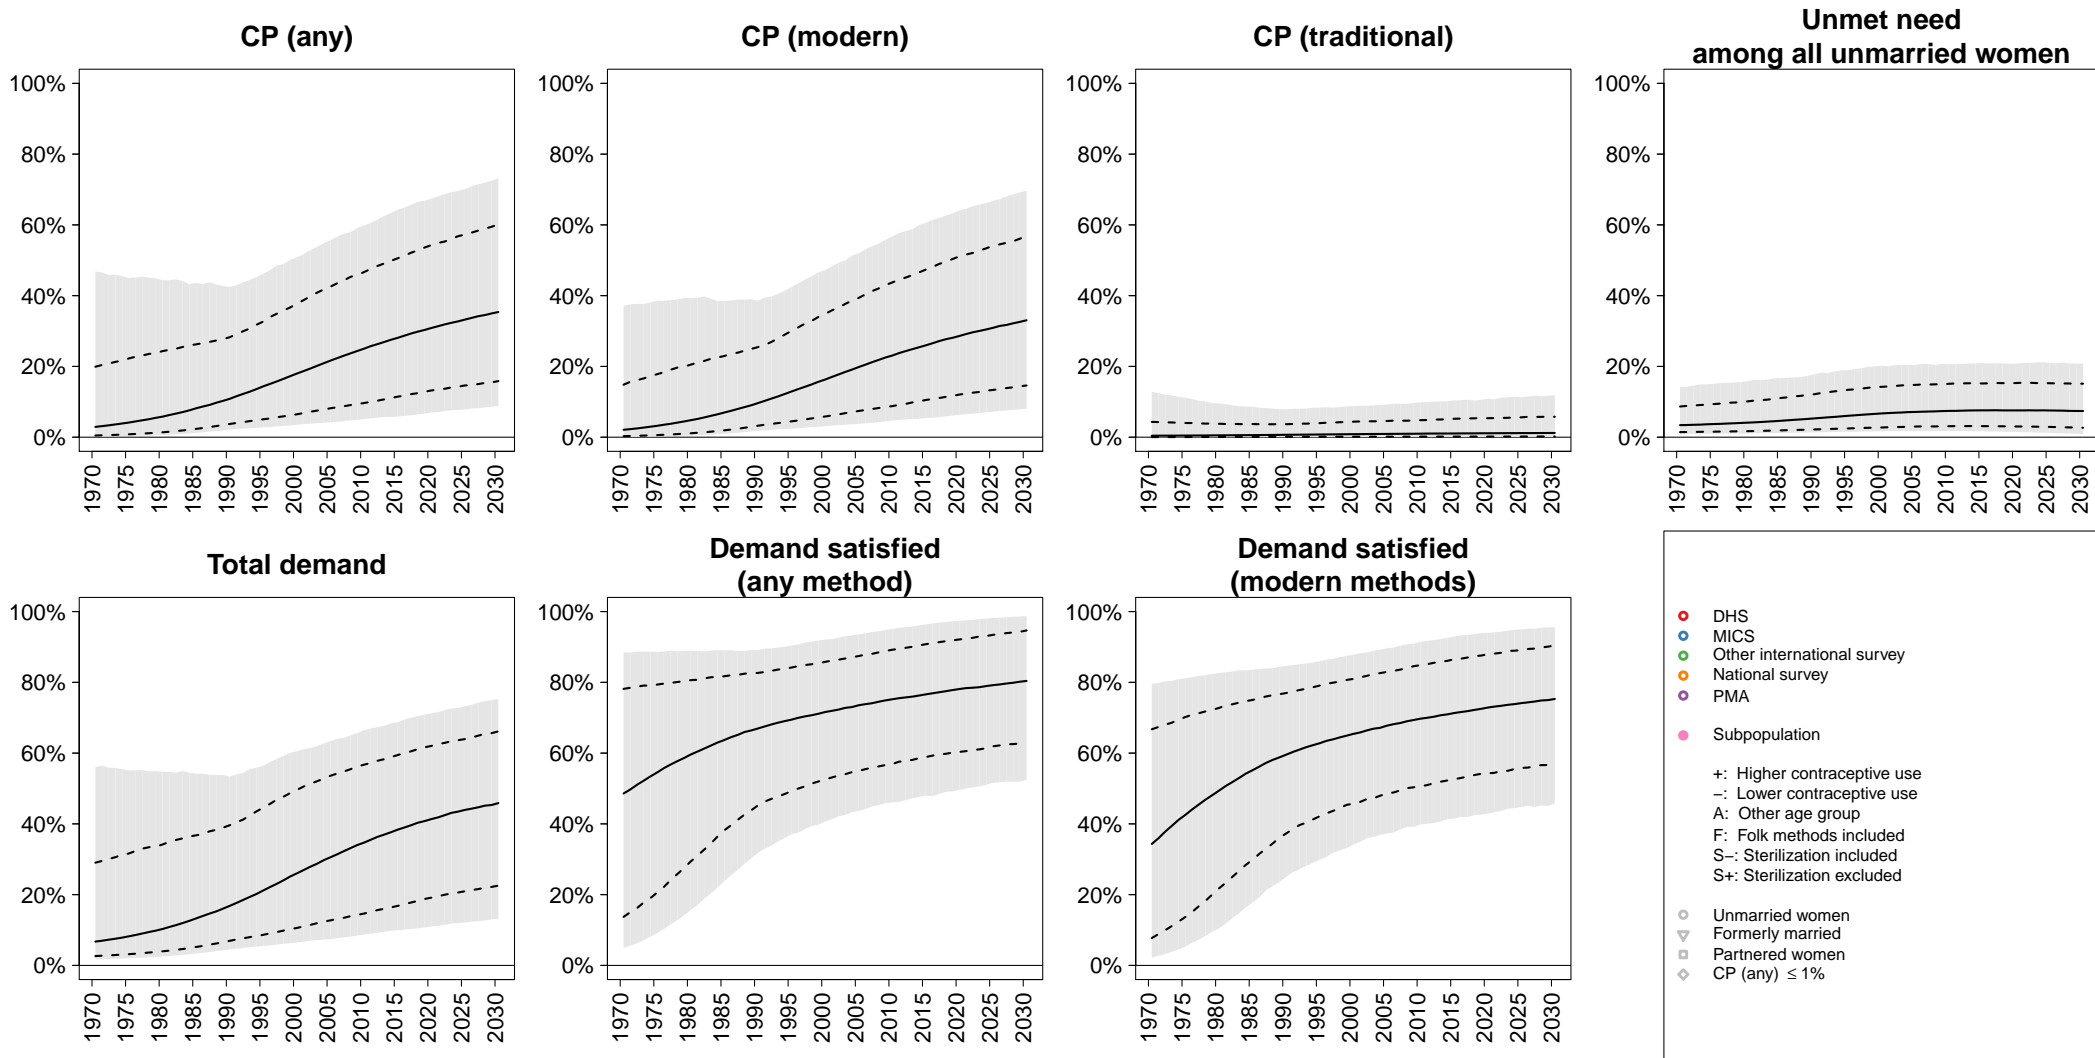



Guam (Micronesia, SA Group 1) --- Unmarried / Not In-Union

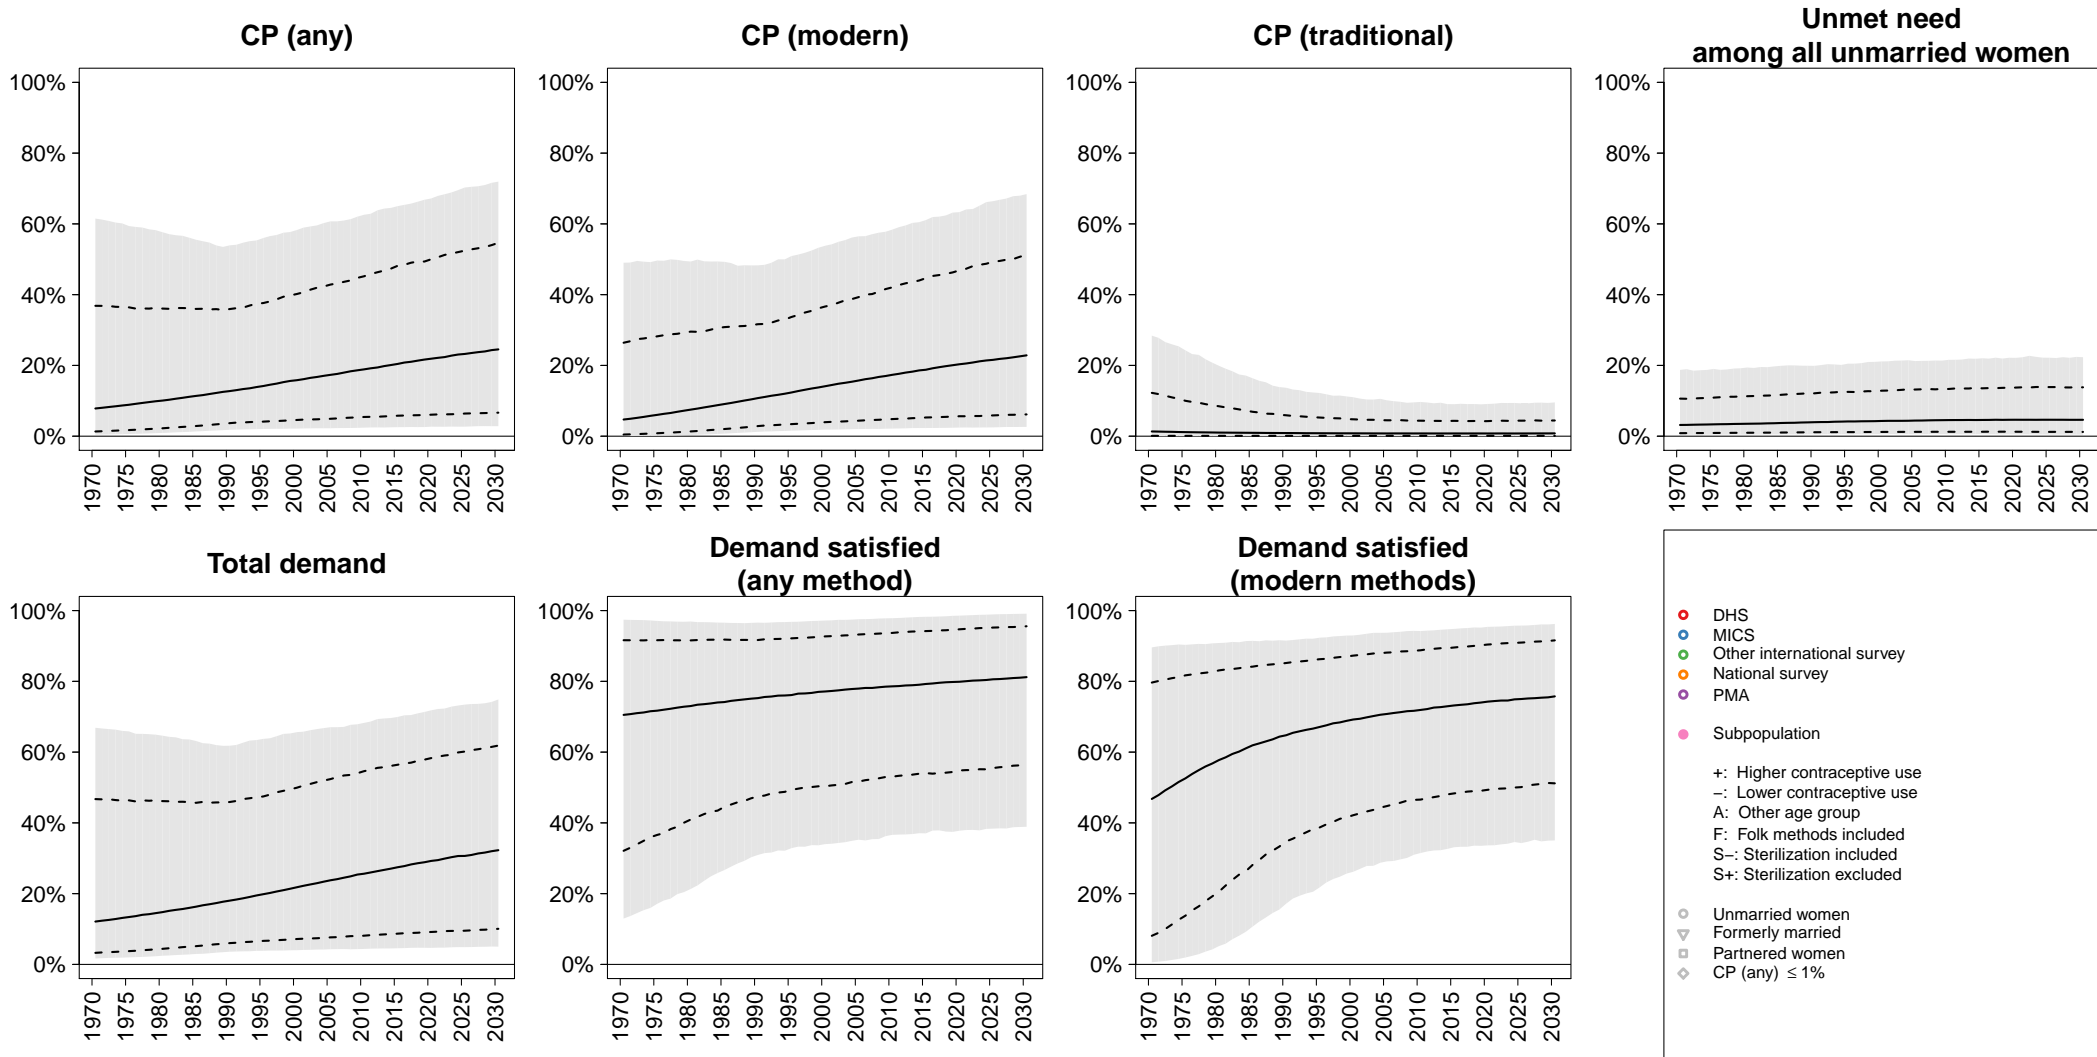

Guatemala (Central America, SA Group 1) --- Unmarried / Not In-Union

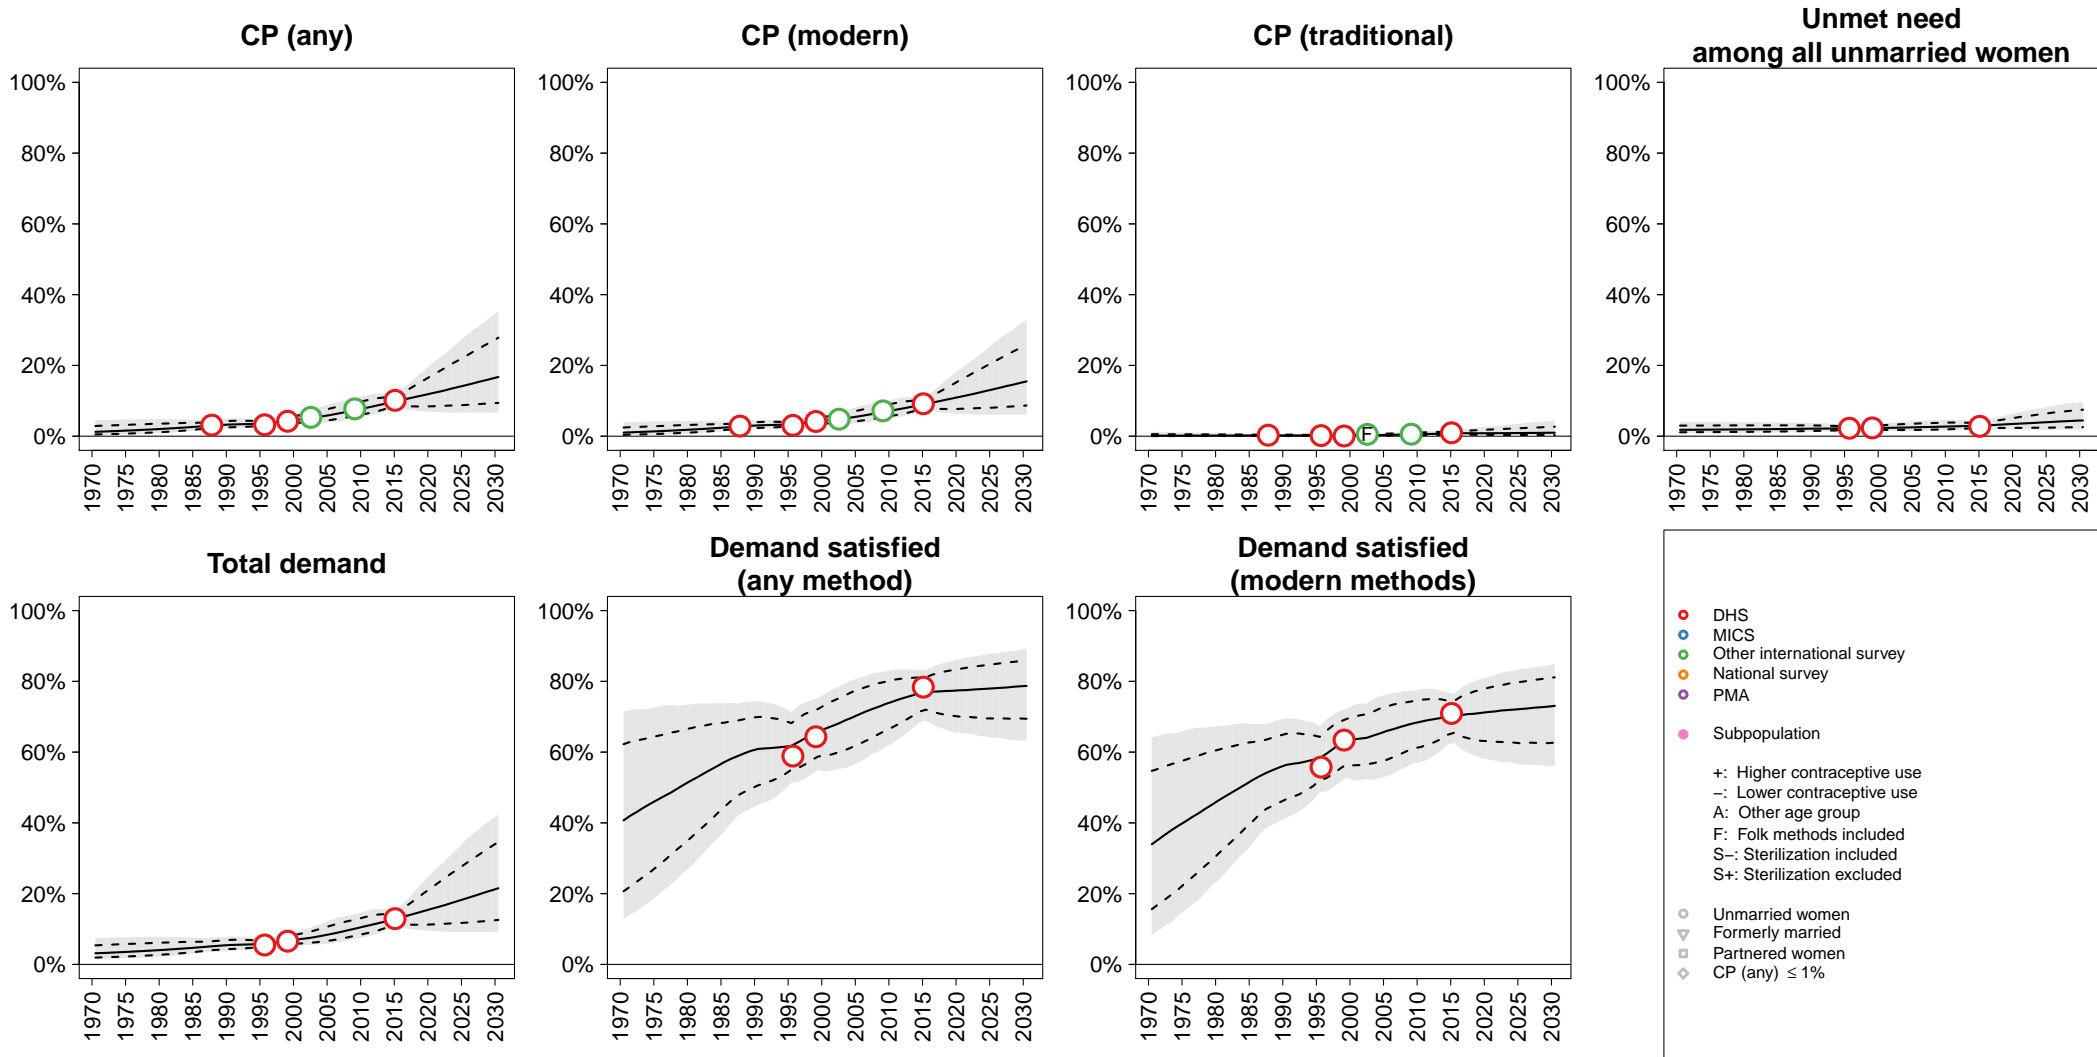

Guinea-Bissau (Western Africa, SA Group 1) --- Unmarried / Not In-Union

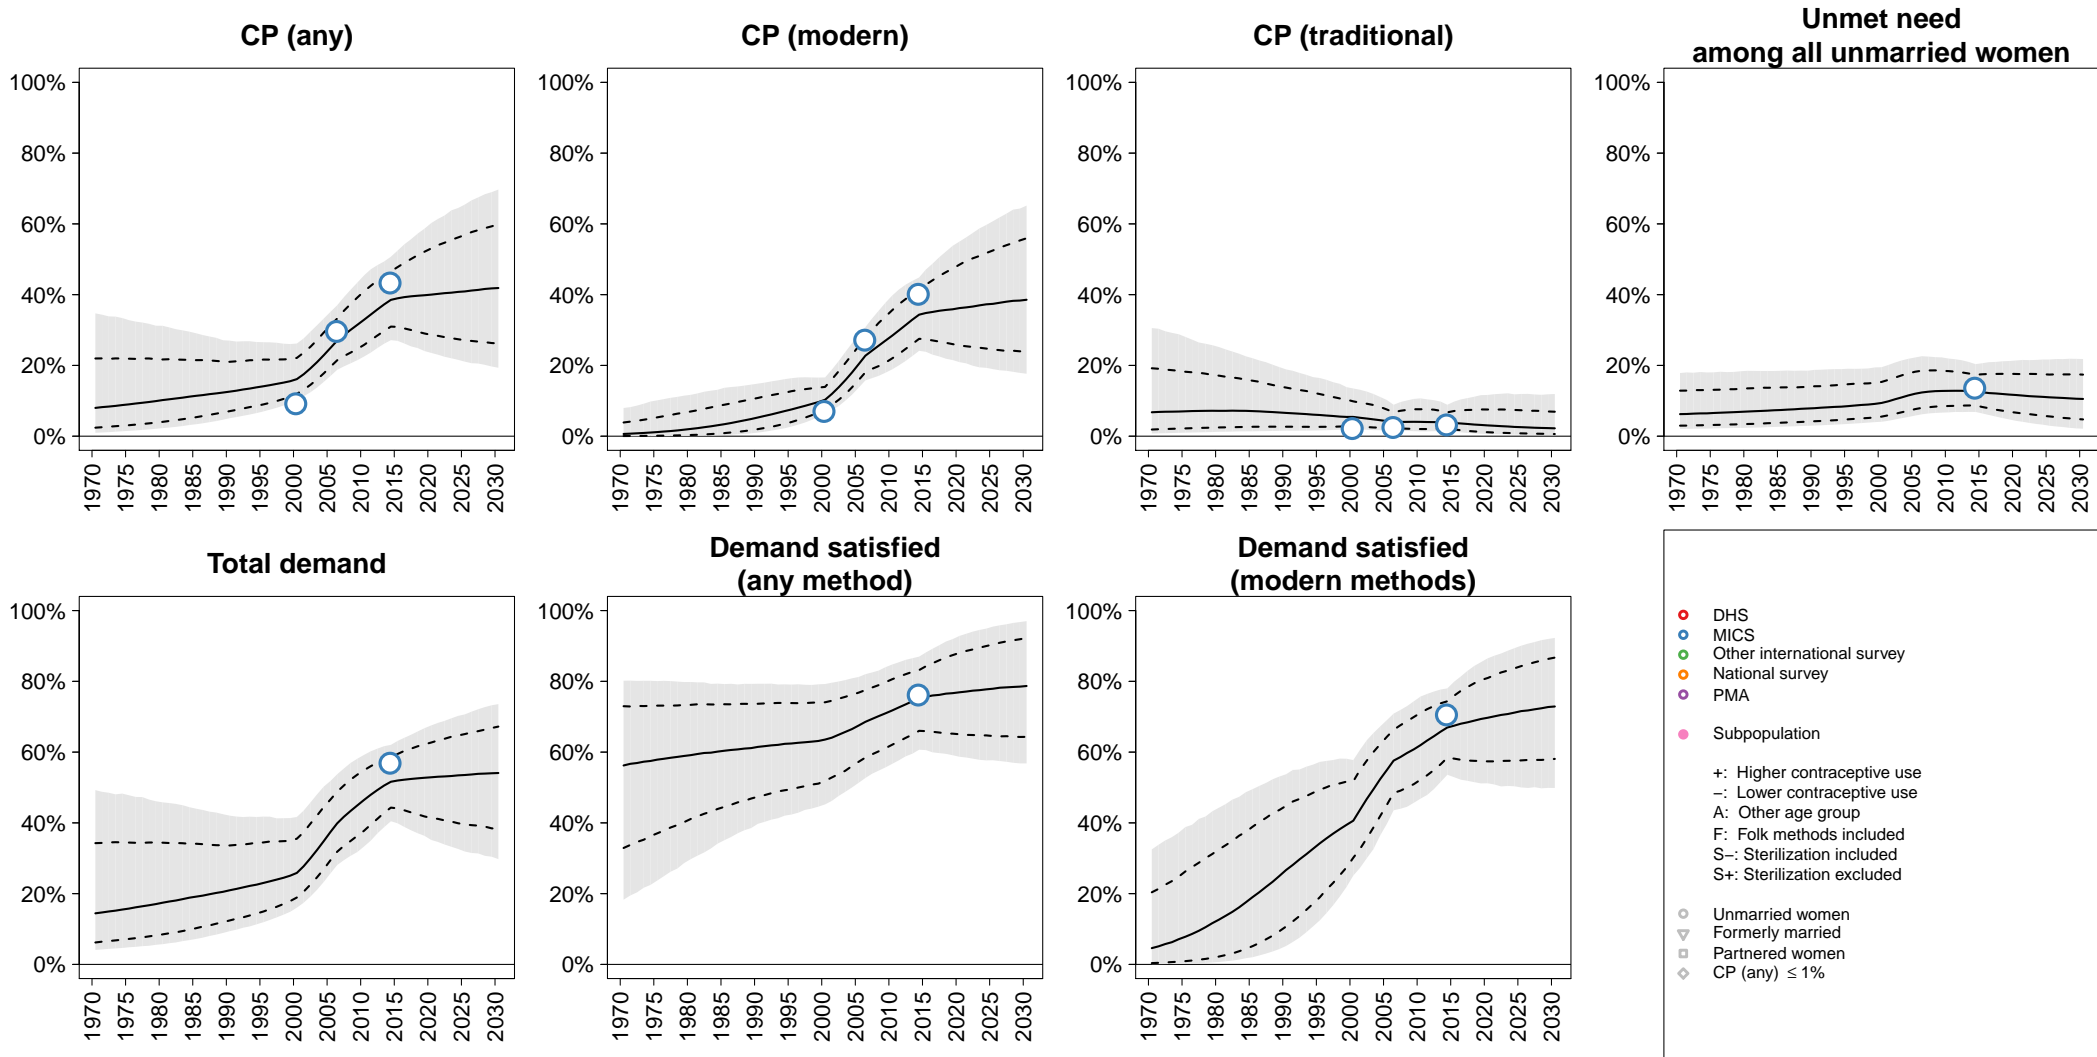

Guinea (Western Africa, SA Group 1) --- Unmarried / Not In-Union

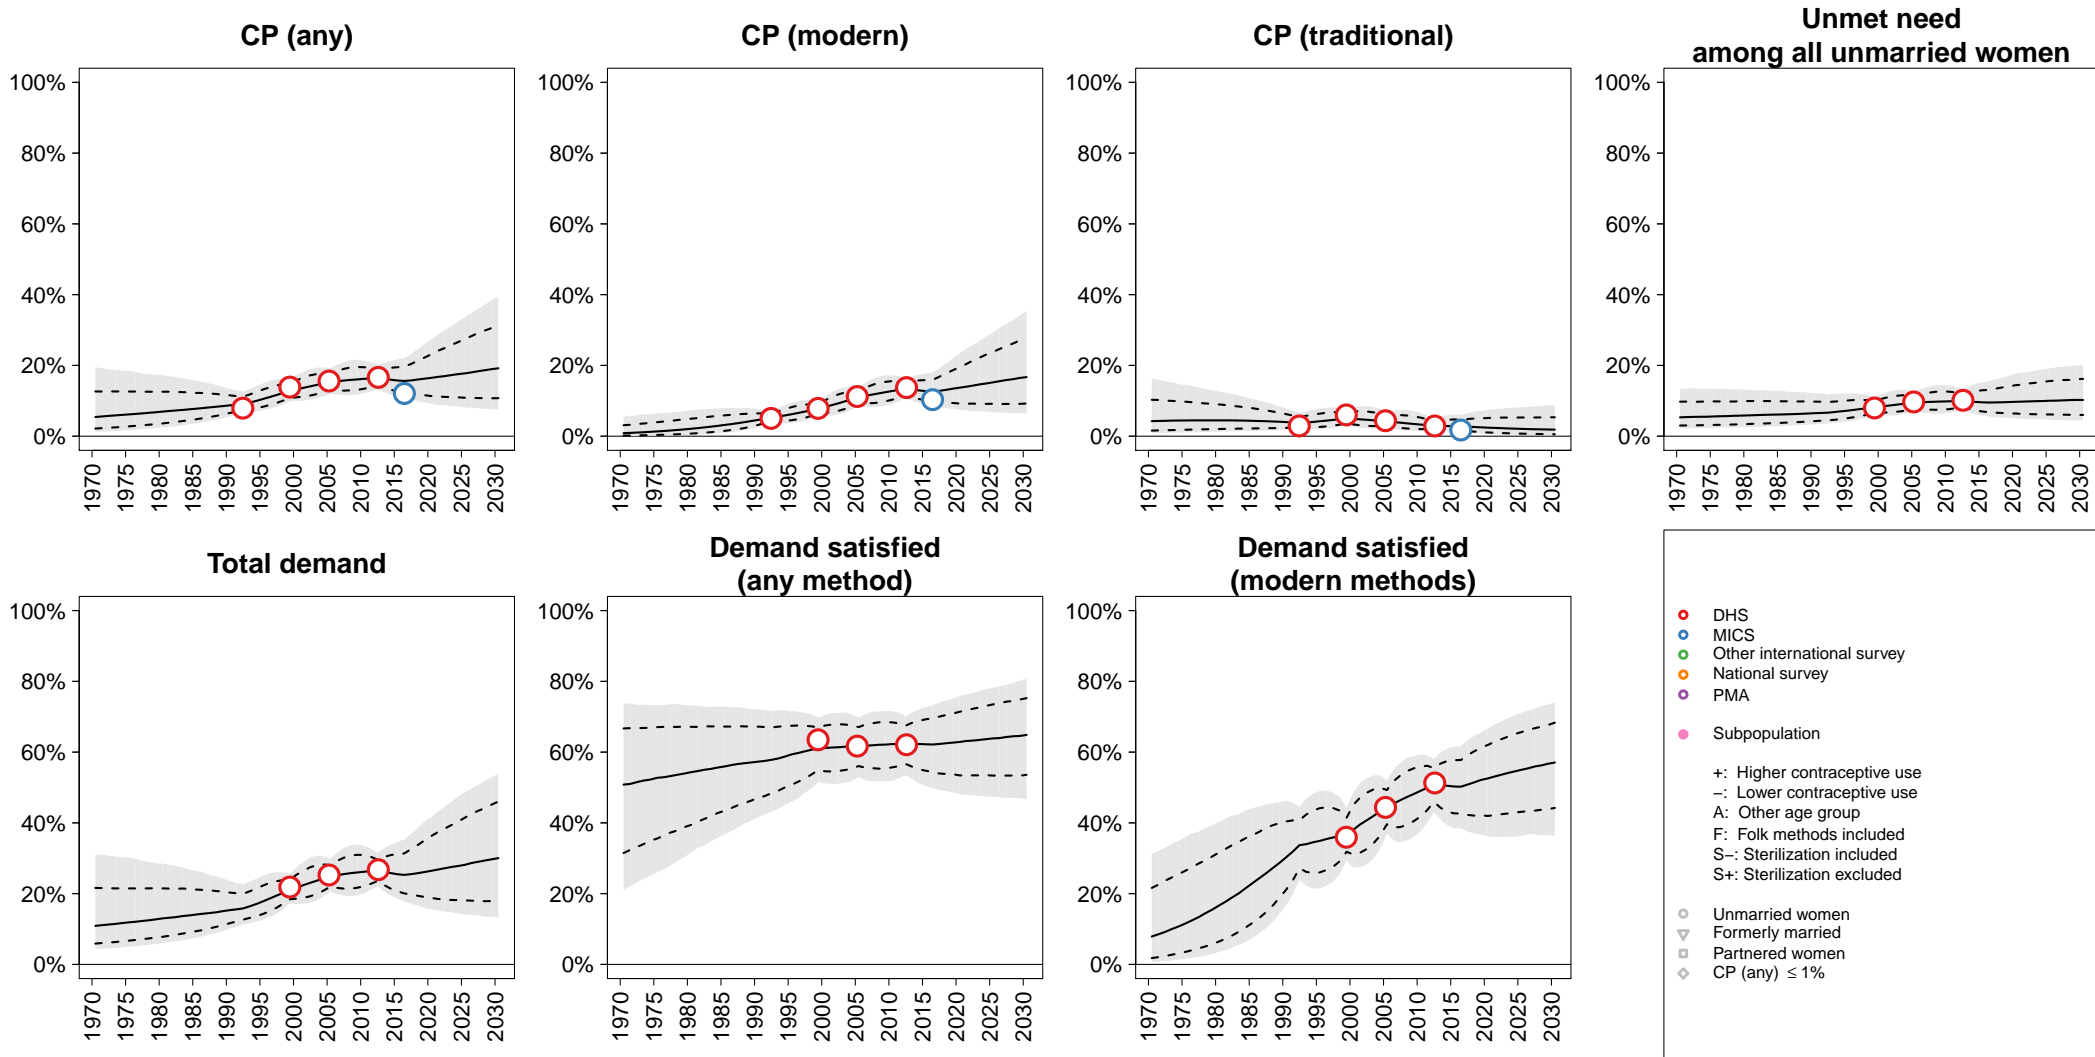

Guyana (South America, SA Group 1) --- Unmarried / Not In-Union

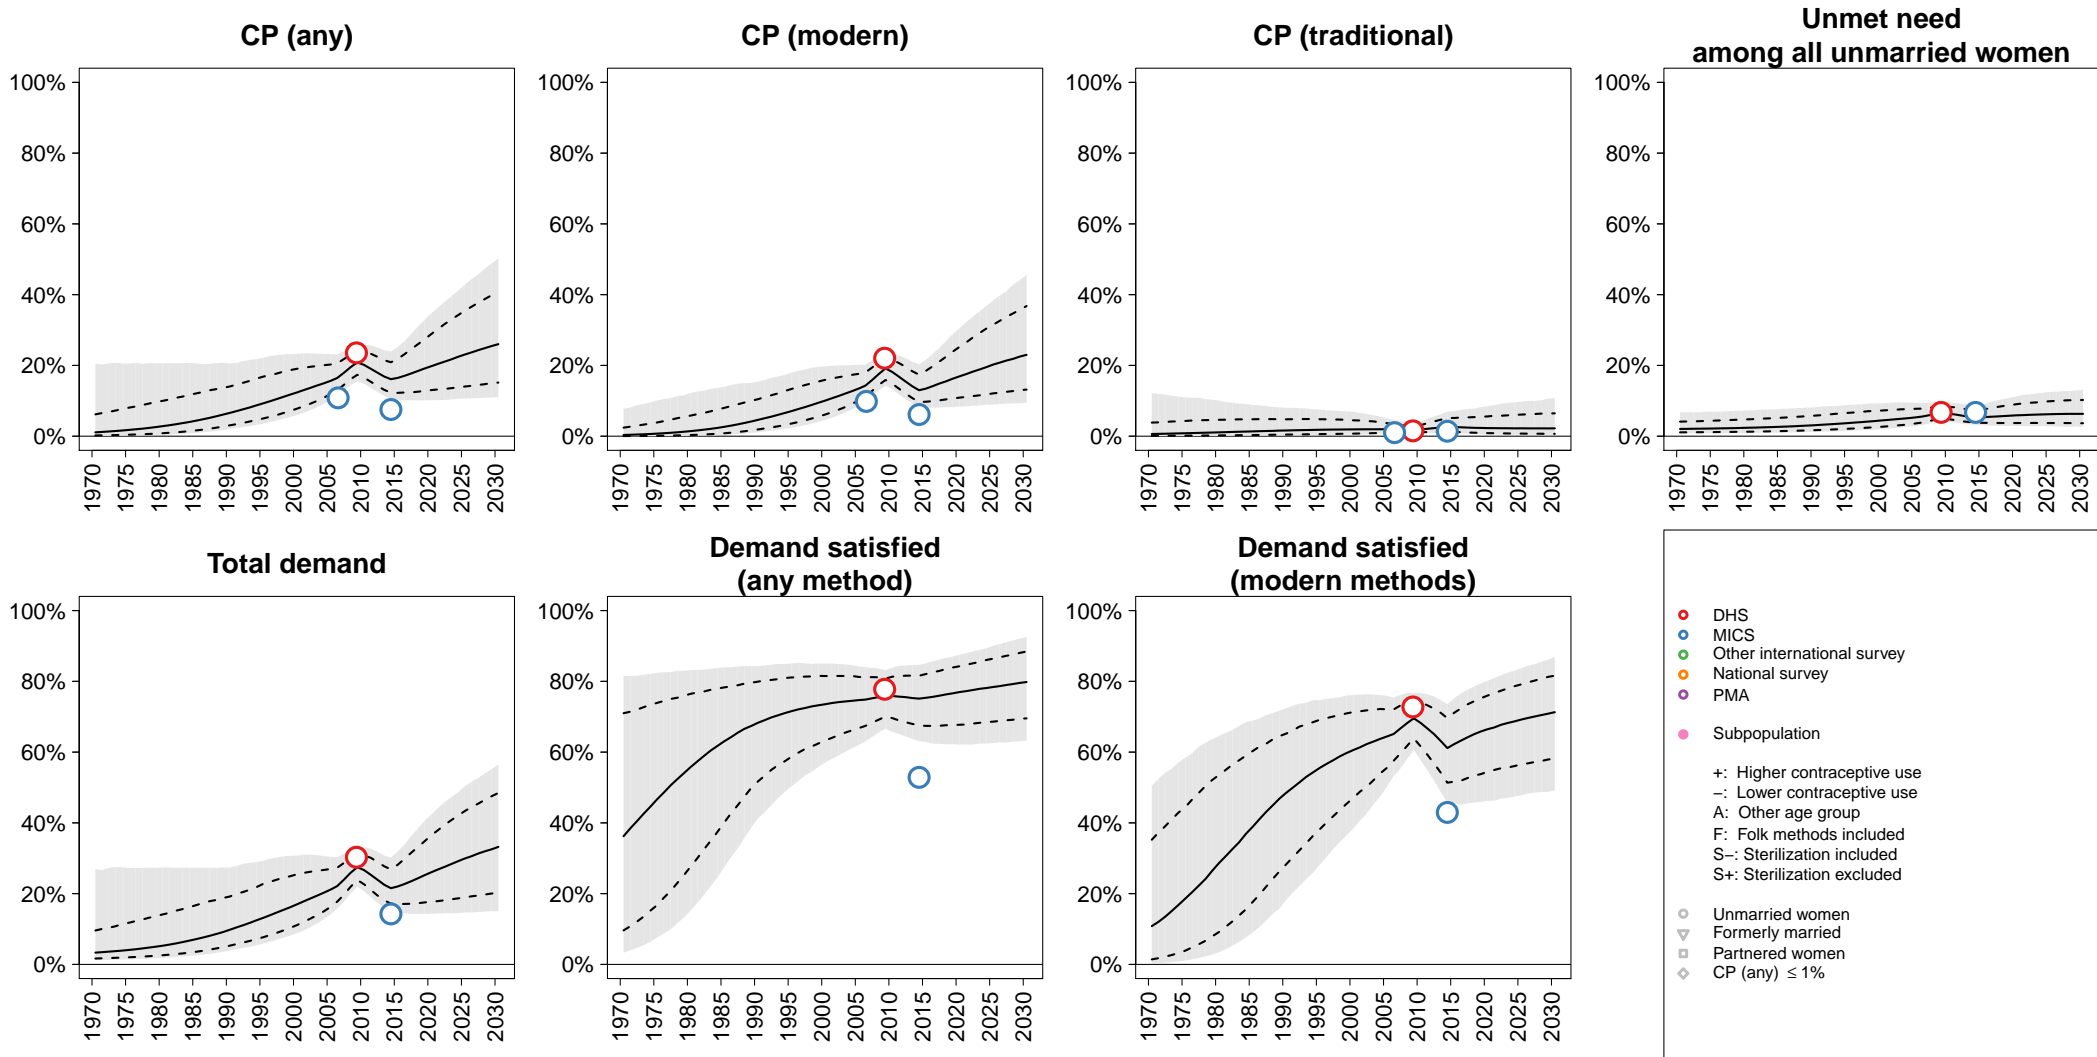

Haiti (Caribbean, SA Group 1) --- Unmarried / Not In-Union

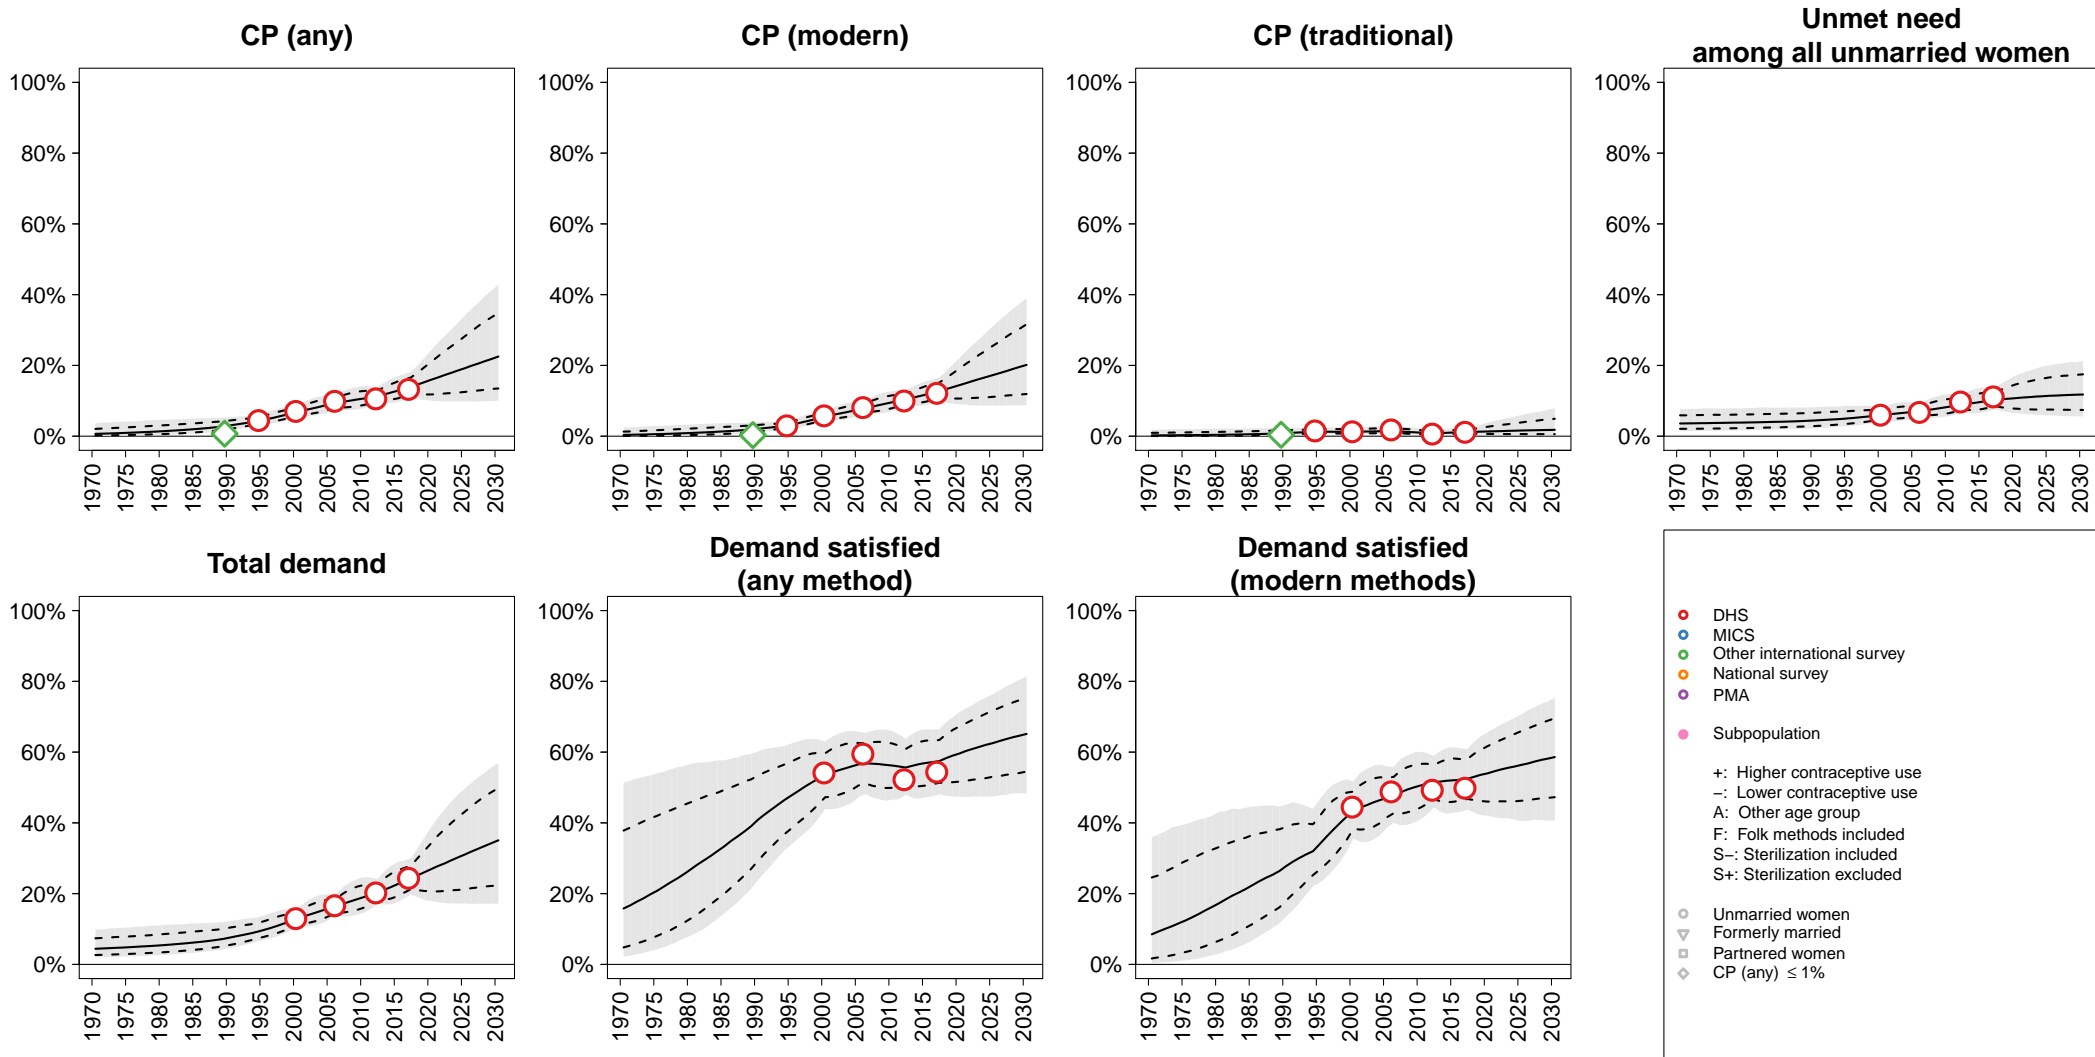

Honduras (Central America, SA Group 1) --- Unmarried / Not In-Union

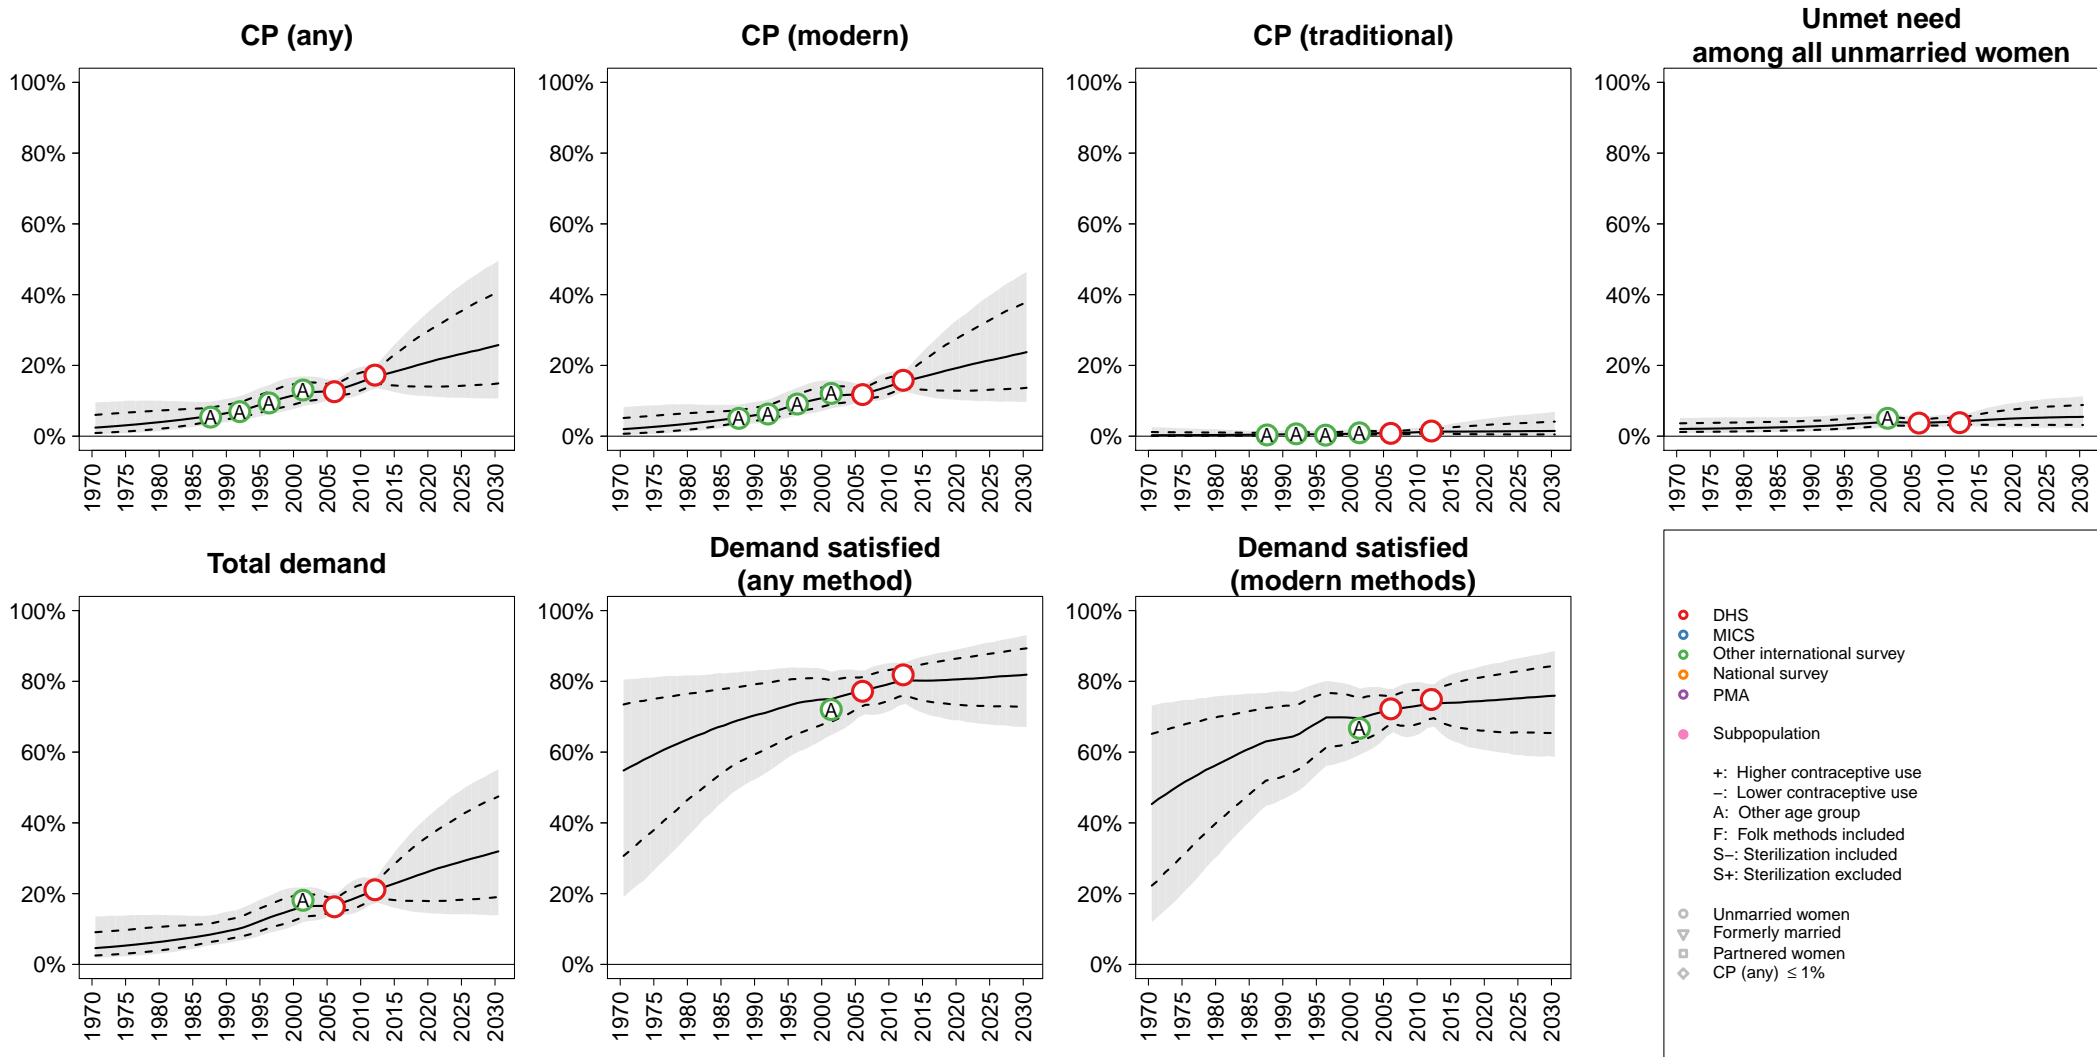

Hungary (Eastern Europe, SA Group 1) --- Unmarried / Not In-Union

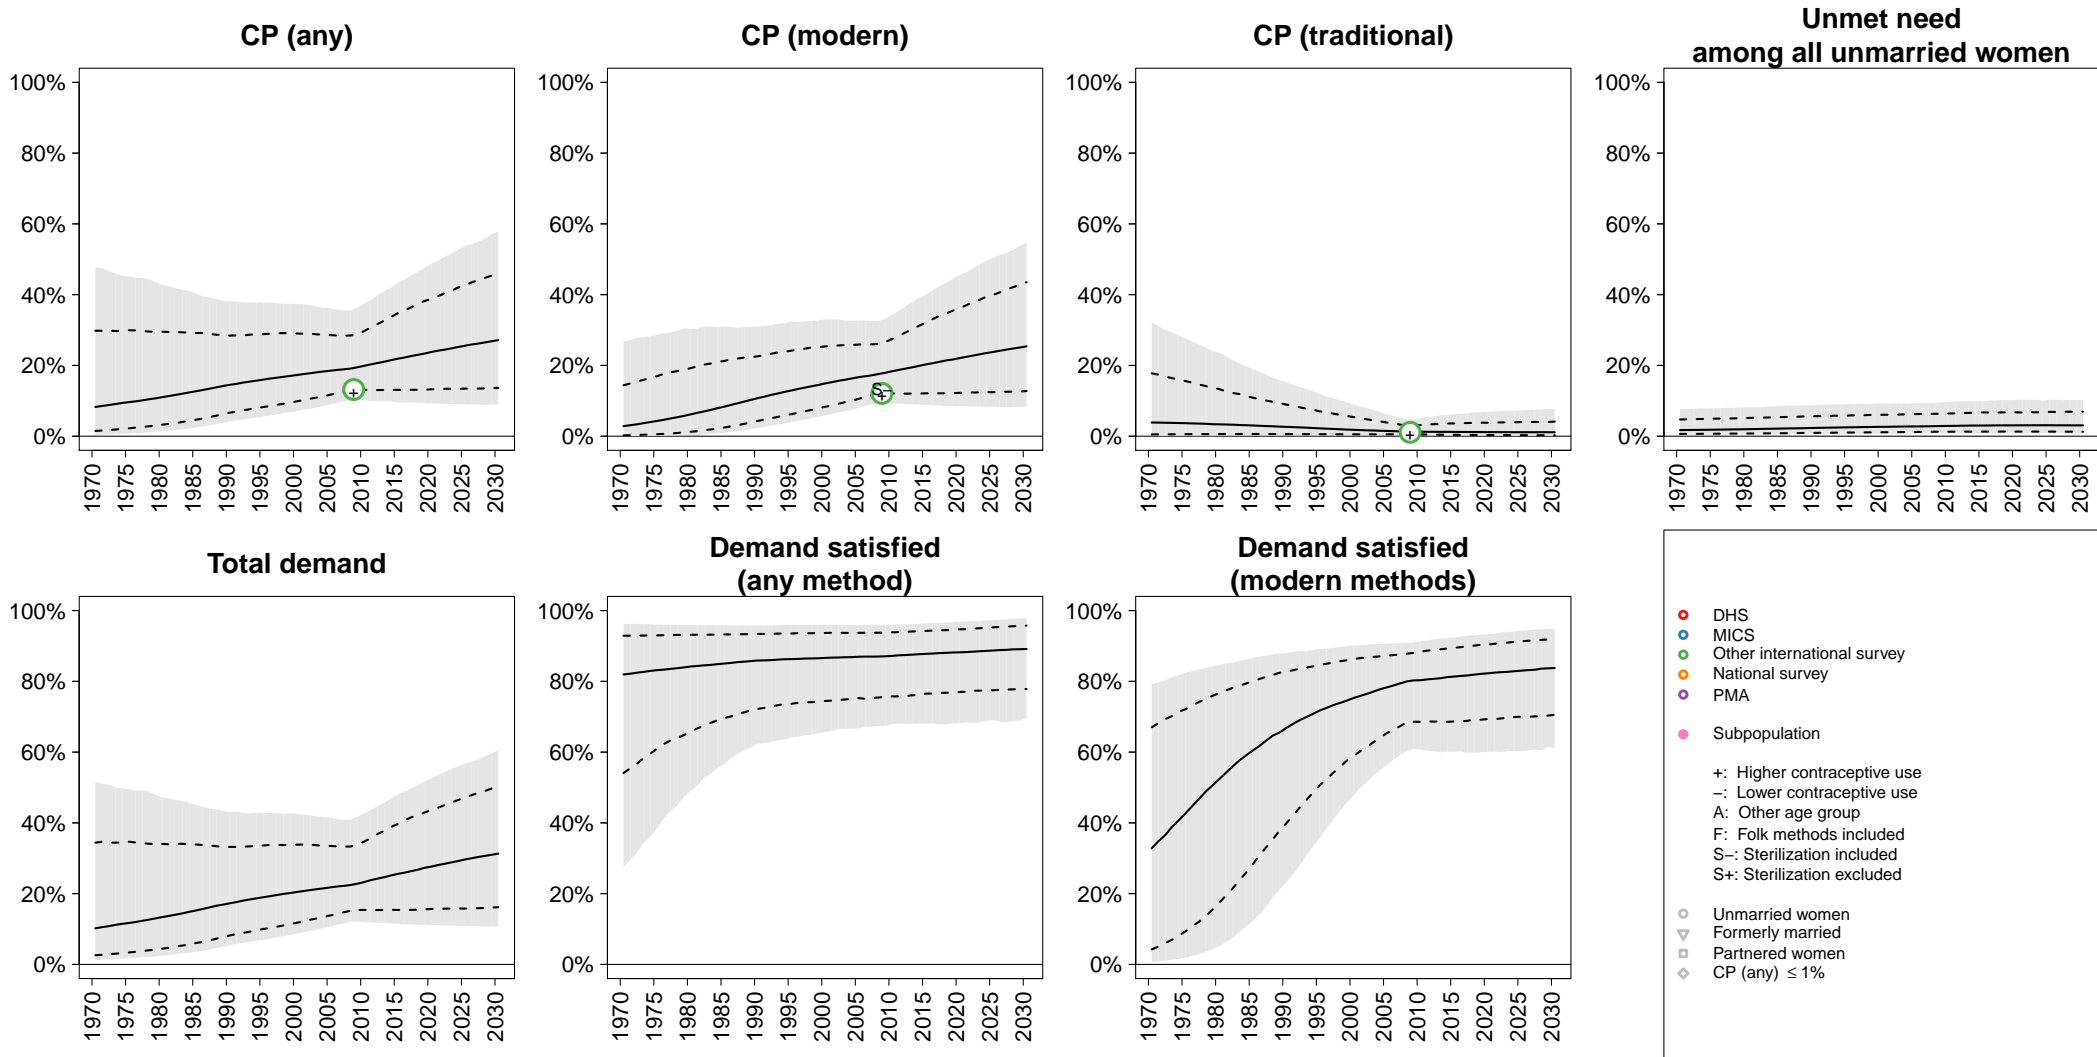



India (Southern Asia, SA Group 0) --- Unmarried / Not In-Union

CP (any)

CP (modern)

CP (traditional)

Unmet need among all unmarried women

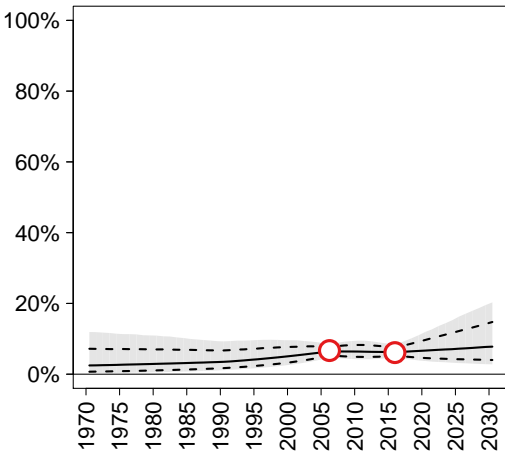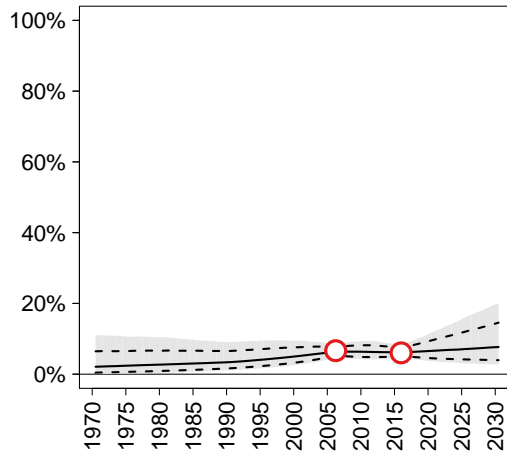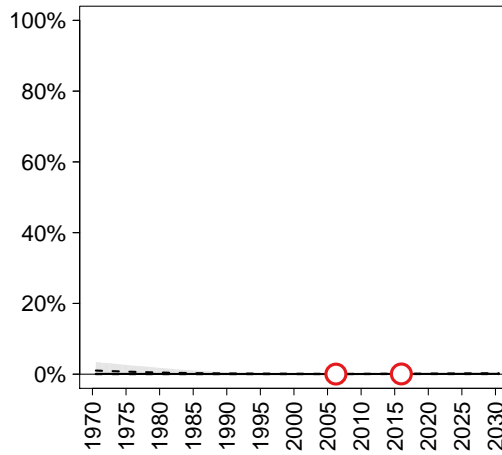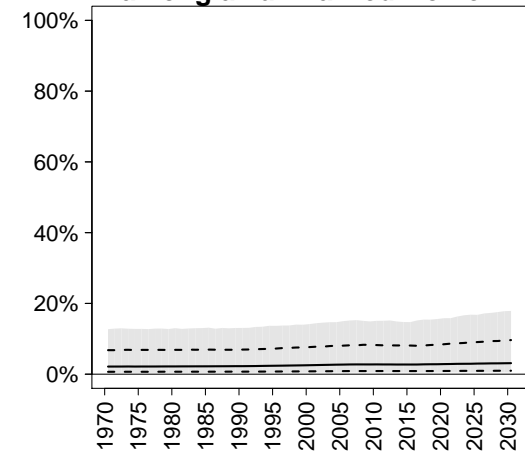

Total demand

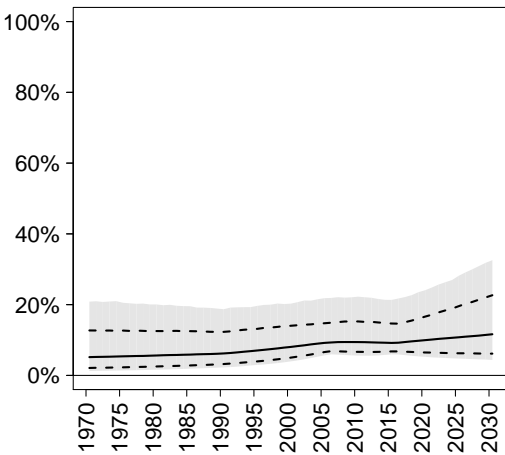

- DHS
- MICS
- Other international survey
- National survey
- PMA
- Subpopulation
- +: Higher contraceptive use
- : Lower contraceptive use
- A: Other age group
- F: Folk methods included
- S-: Sterilization included
- S+: Sterilization excluded
- Unmarried women
- ◁ Formerly married
- ◻ Partnered women
- ◇ CP (any) ≤ 1%

Indonesia (South-eastern Asia, SA Group 0) --- Unmarried / Not In-Union

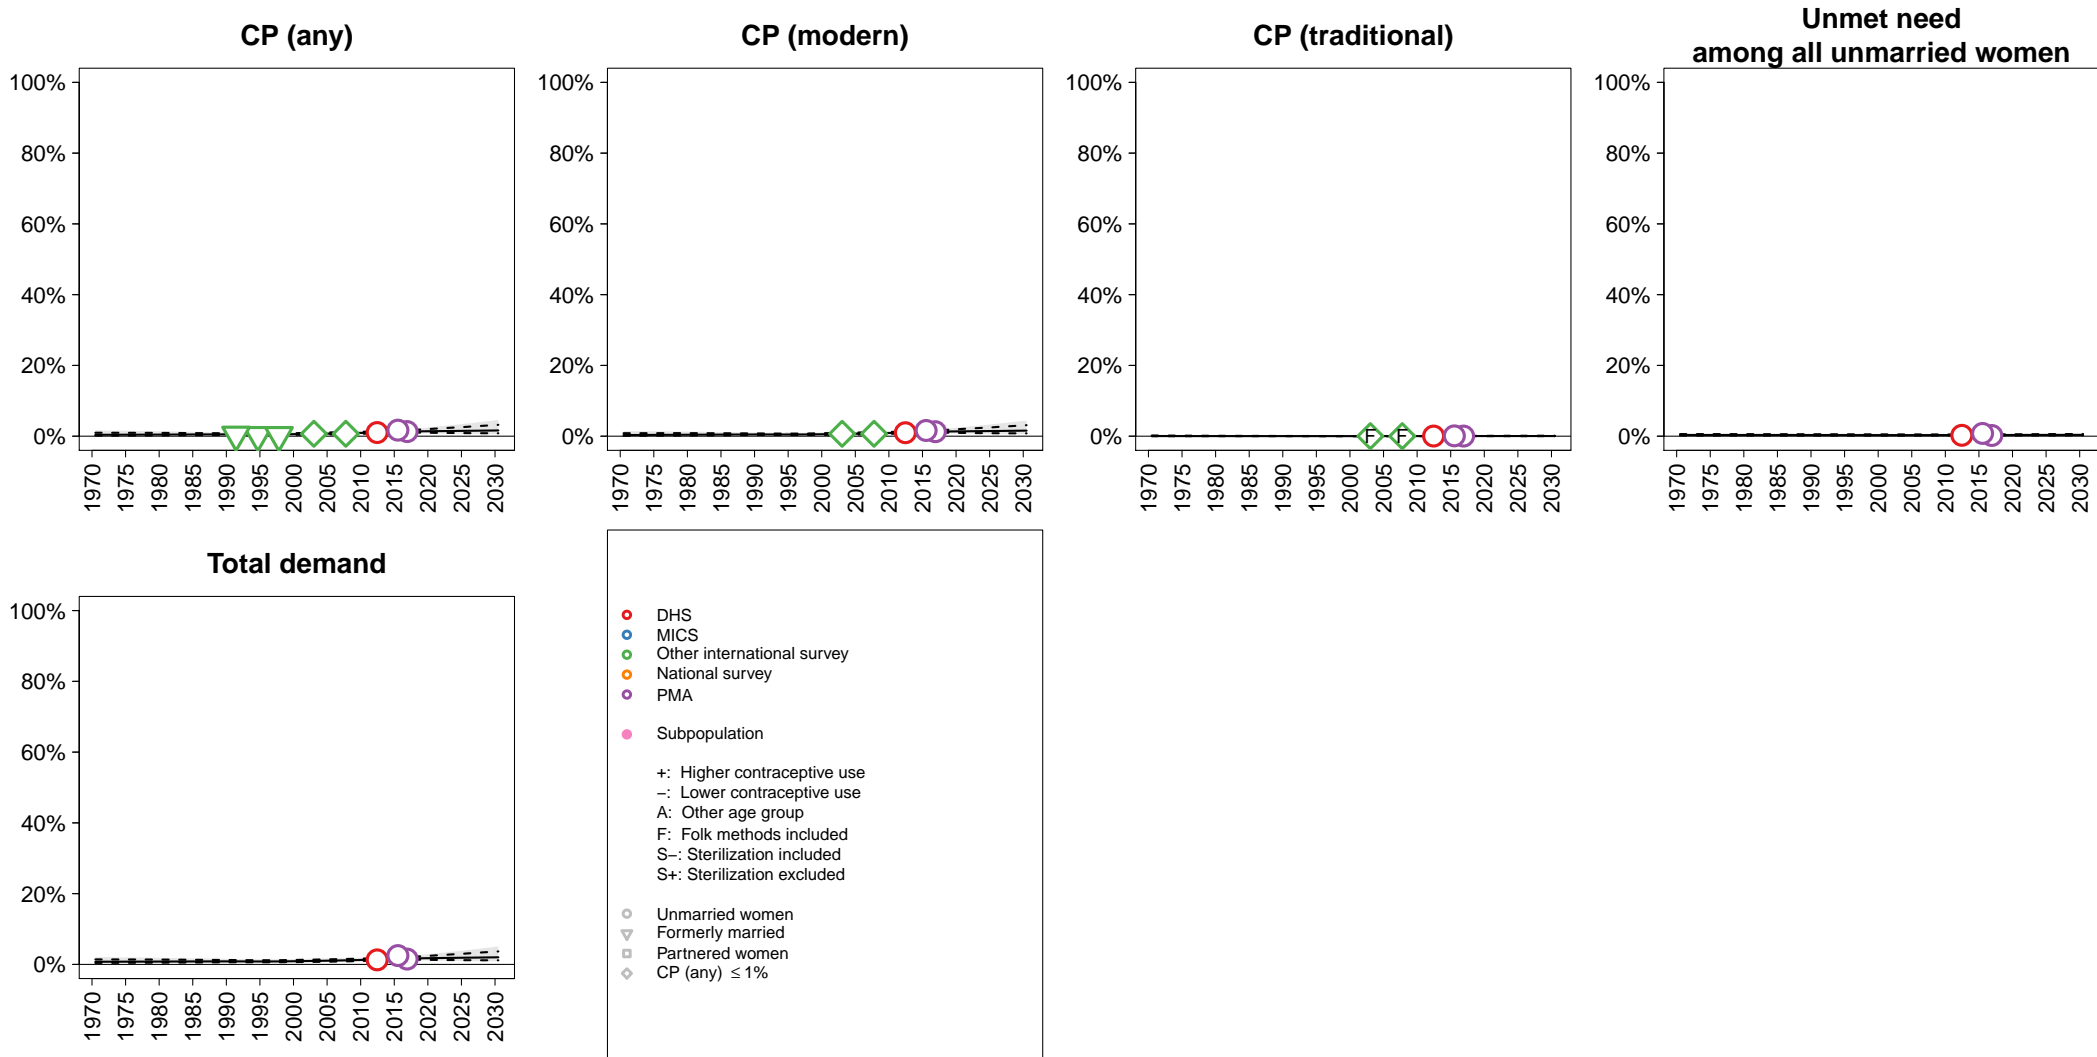

Iran, Islamic Republic of (Southern Asia, SA Group 0) --- Unmarried / Not In-Union

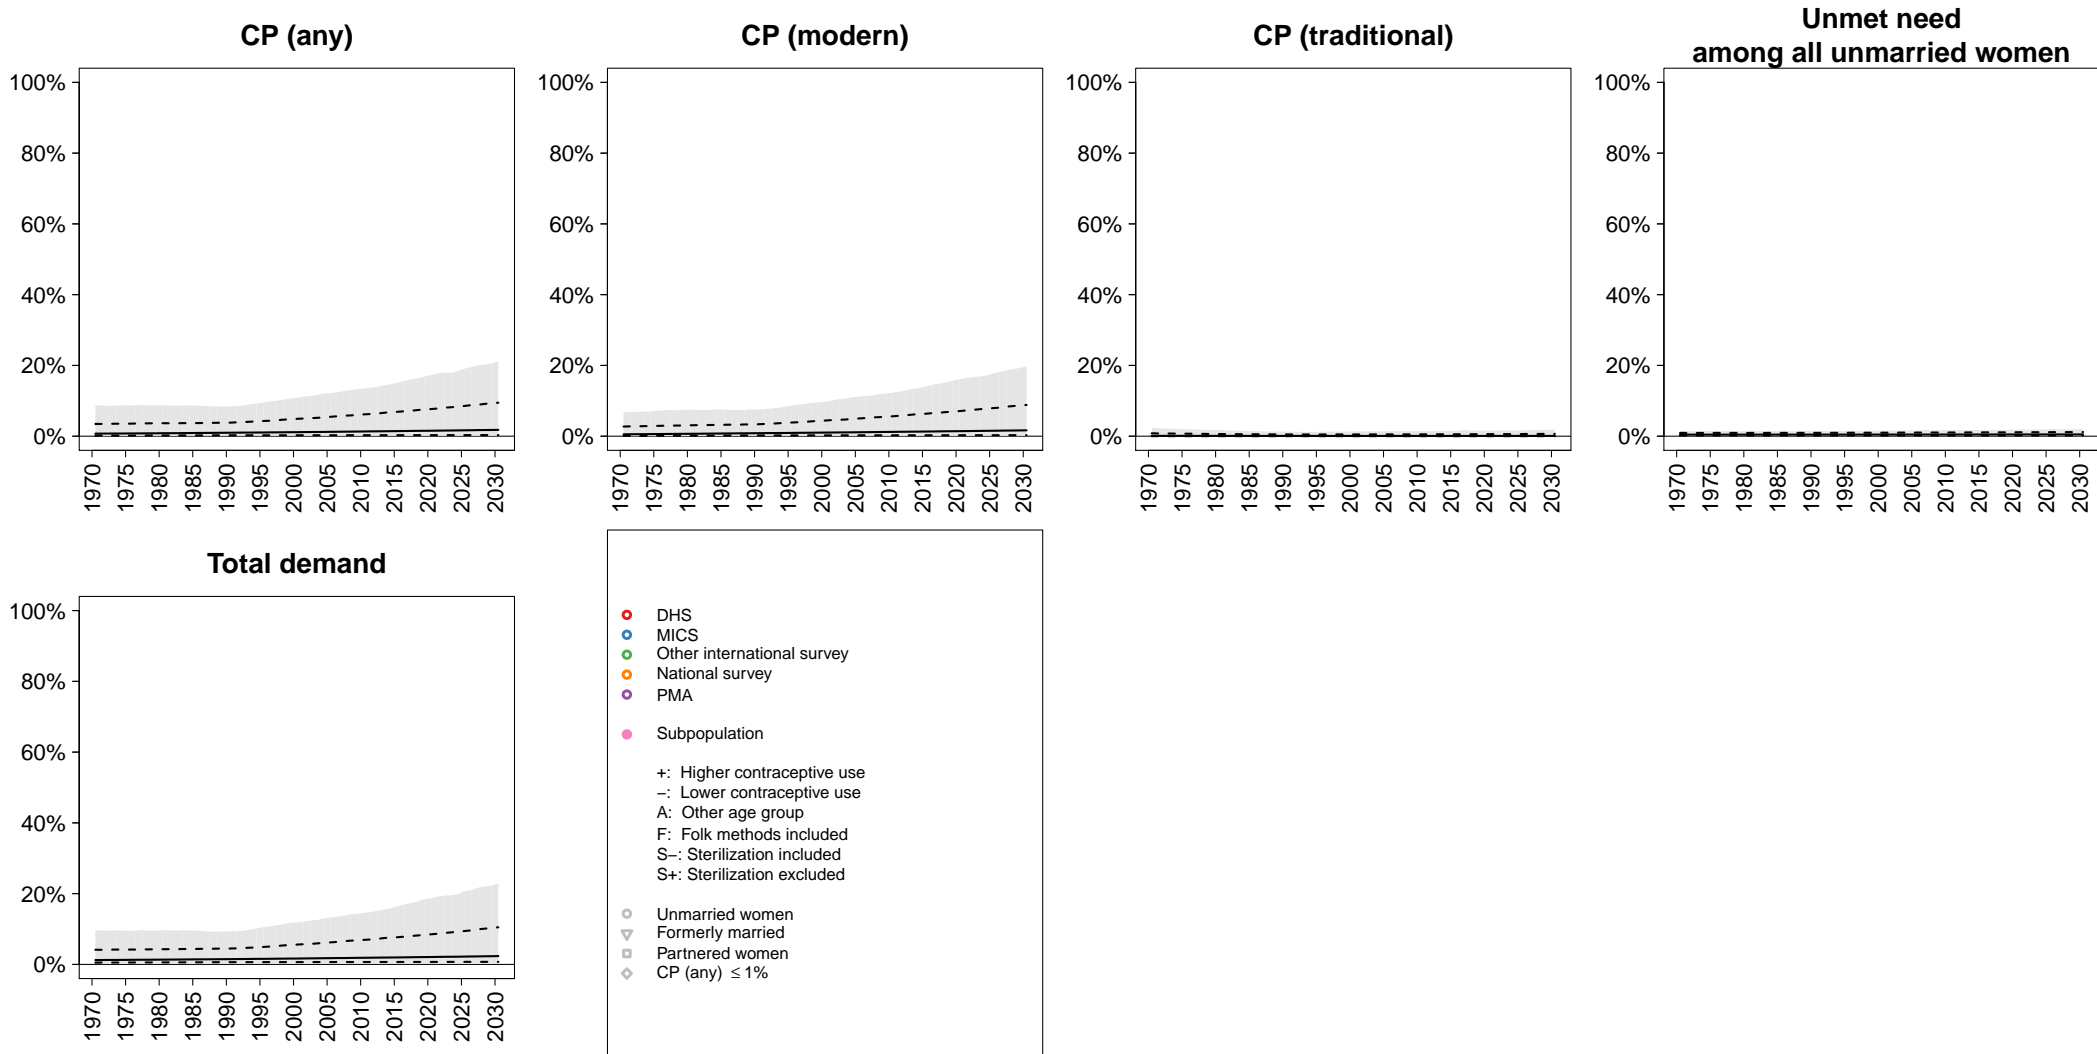

Iraq (Western Asia, SA Group 0) --- Unmarried / Not In-Union

CP (any)

CP (modern)

CP (traditional)

Unmet need among all unmarried women

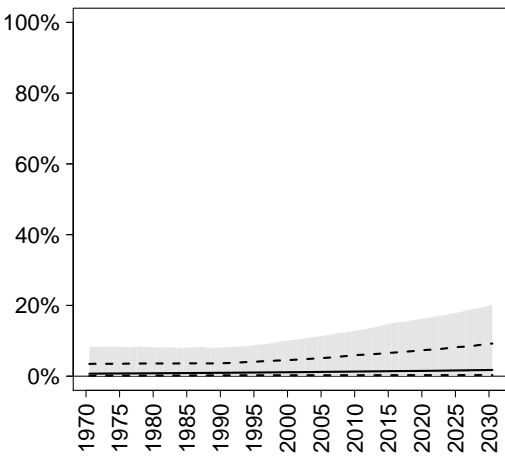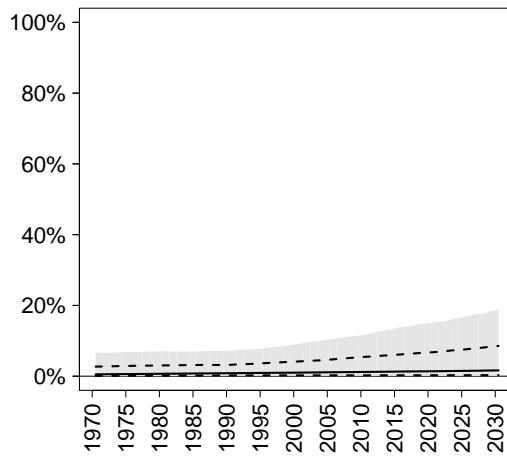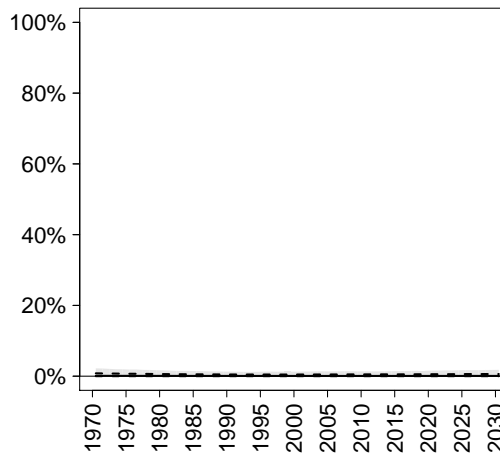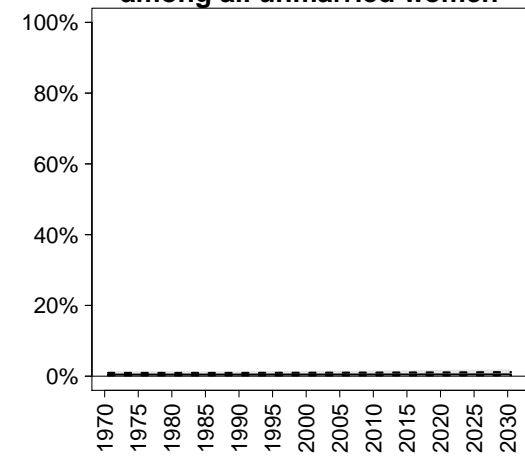

Total demand

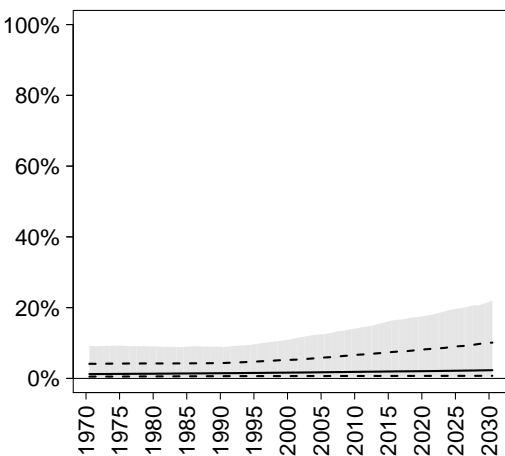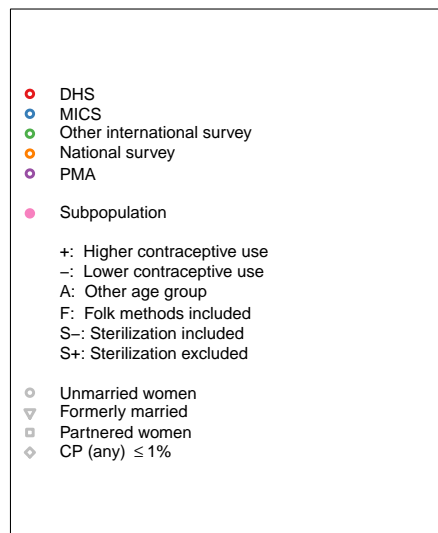

Ireland (Northern Europe, SA Group 1) --- Unmarried / Not In-Union

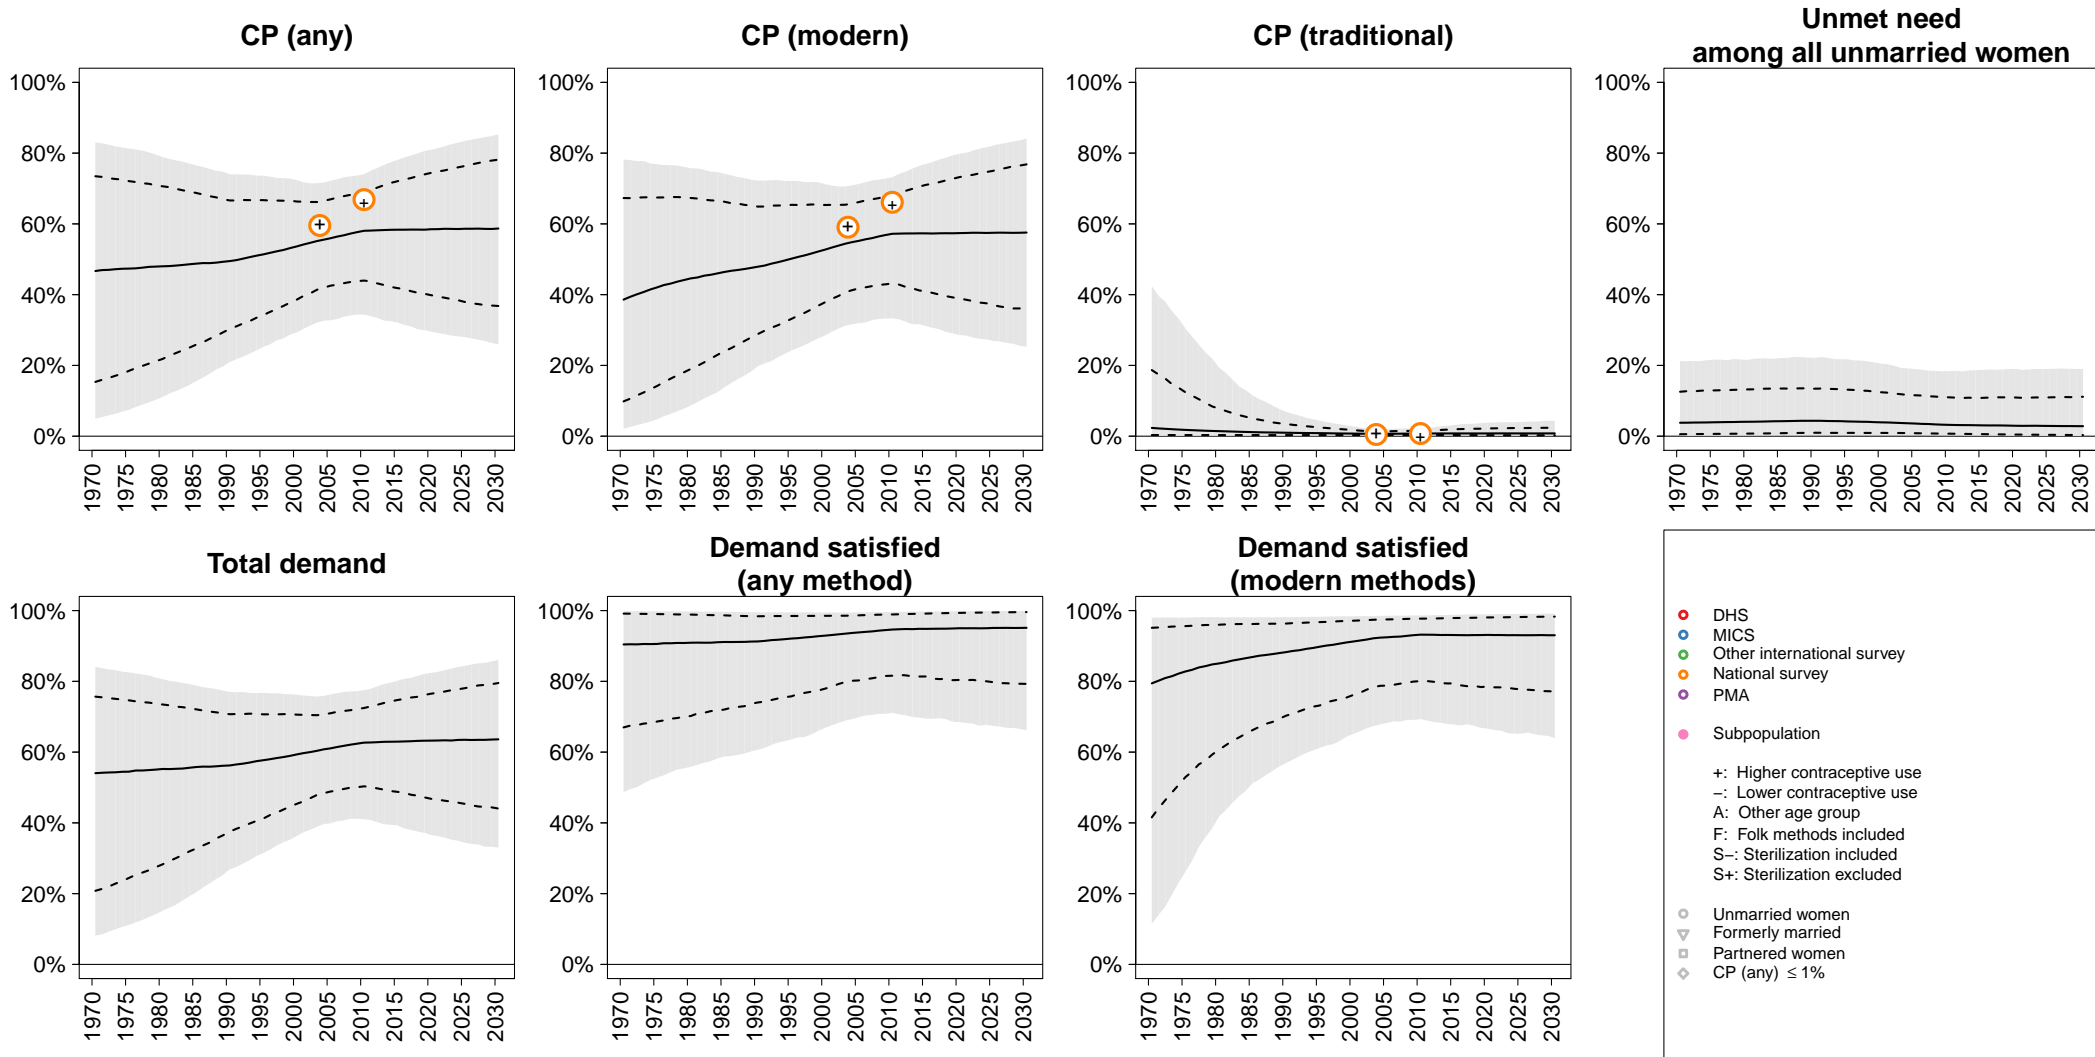

Israel (Western Asia, SA Group 1) --- Unmarried / Not In-Union

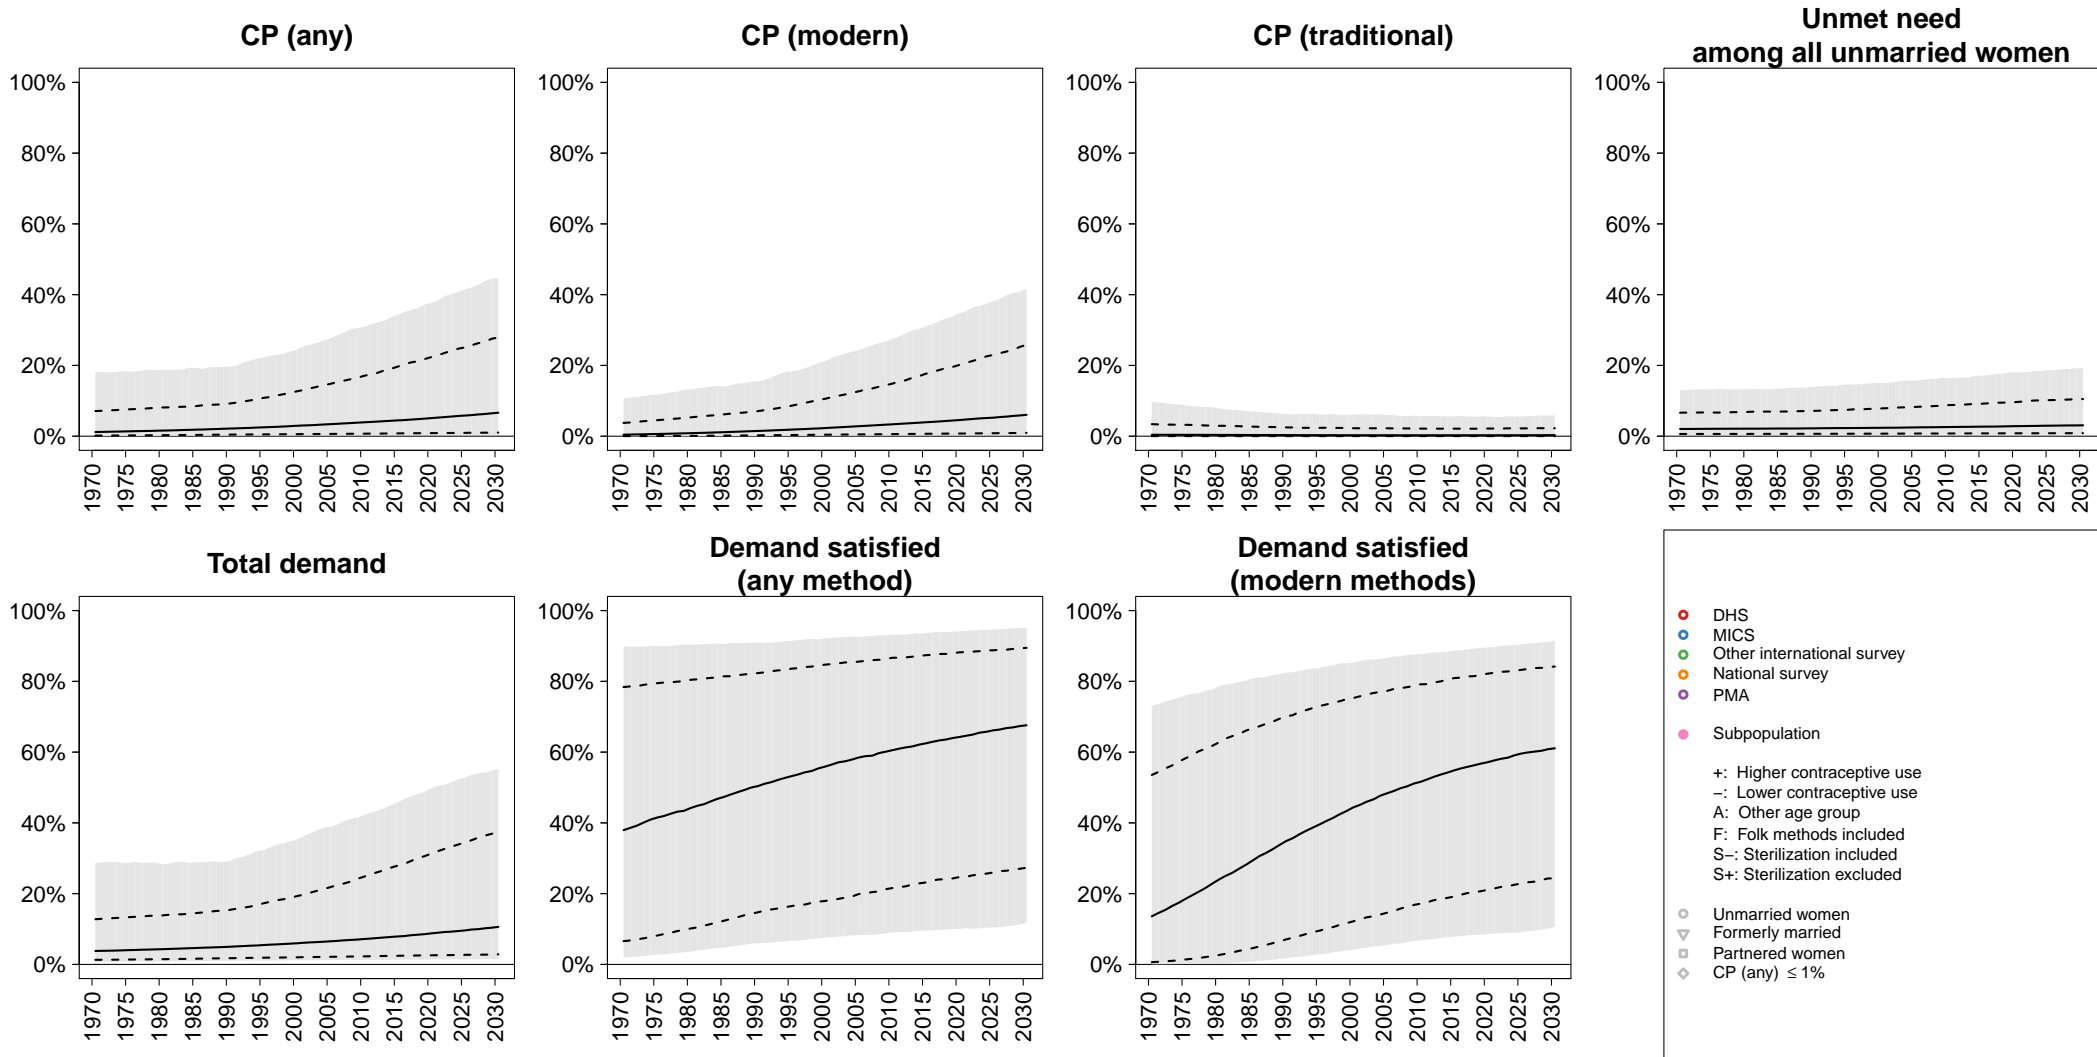

Italy (Southern Europe, SA Group 1) --- Unmarried / Not In-Union

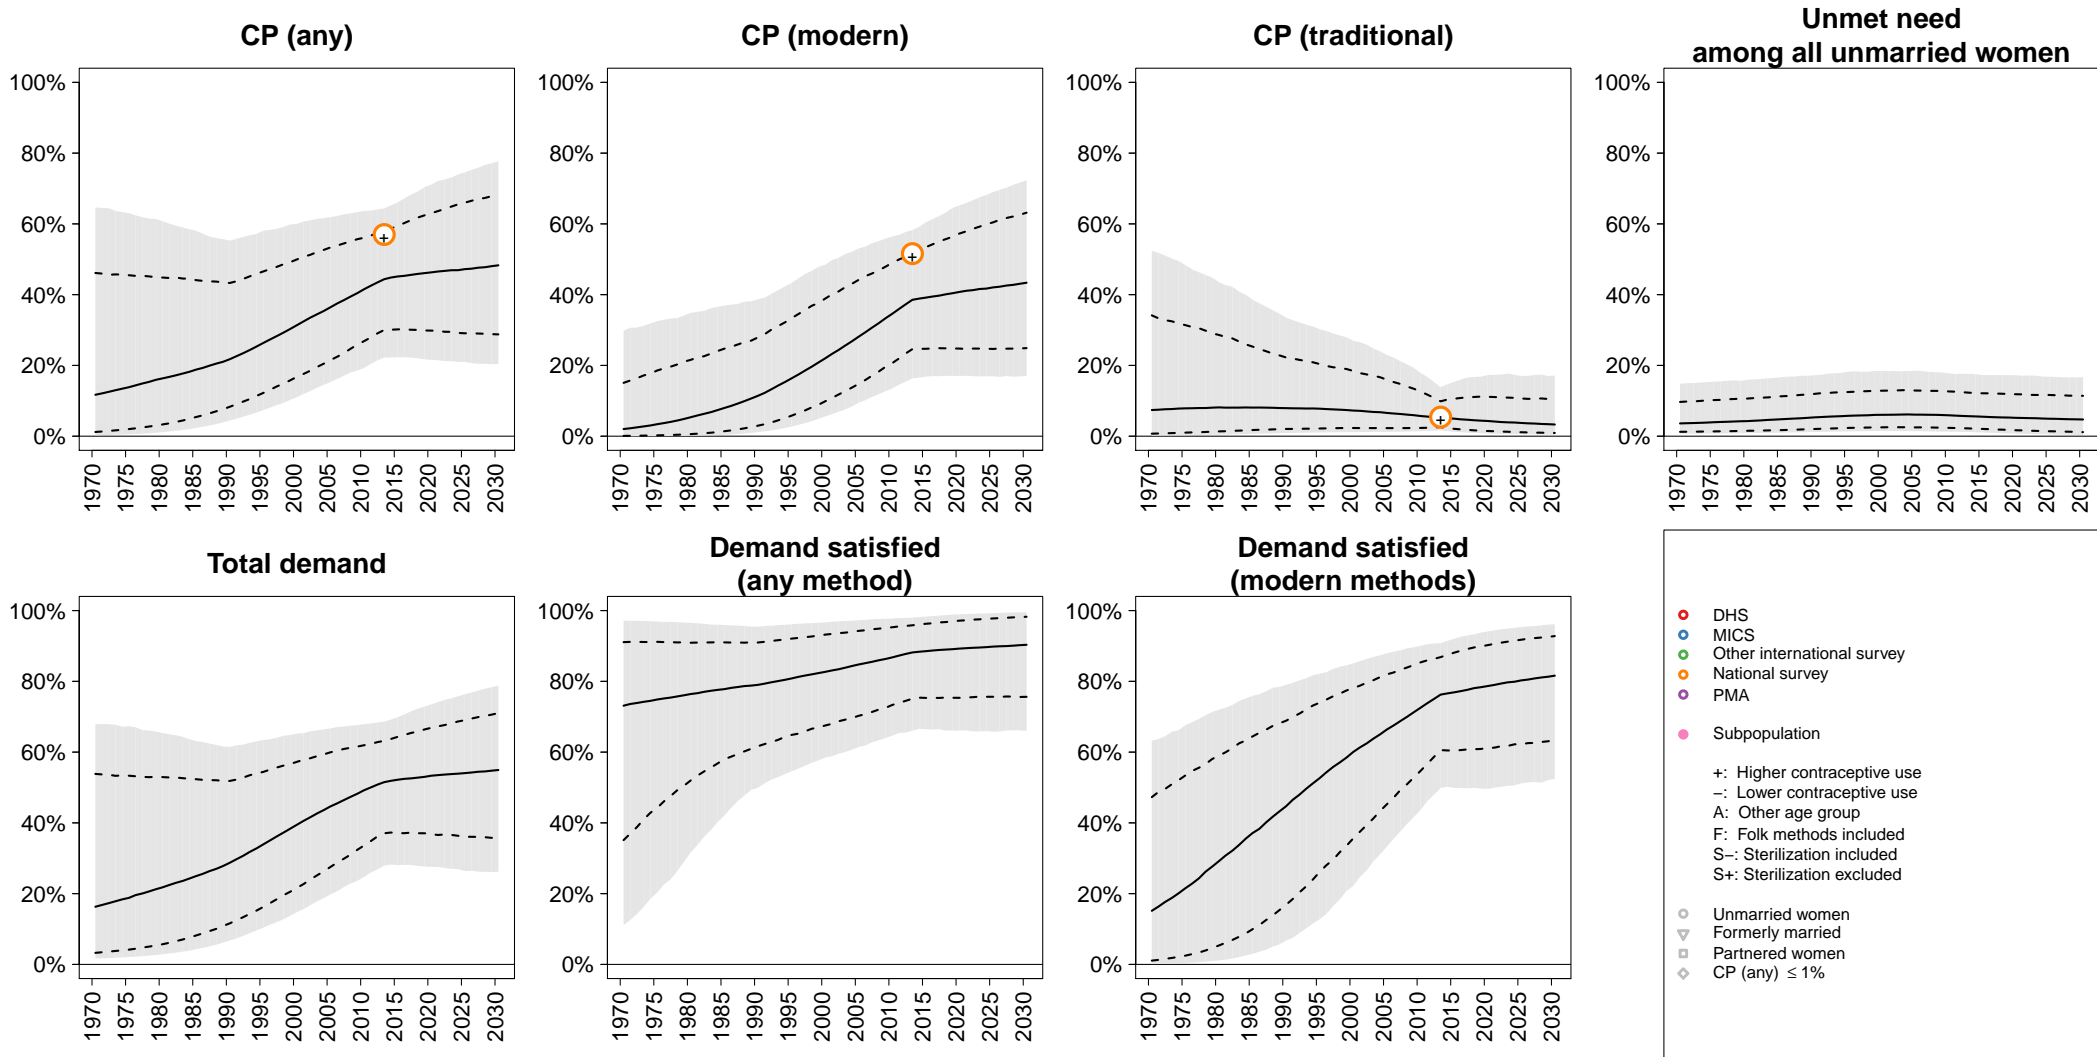

Jamaica (Caribbean, SA Group 1) --- Unmarried / Not In-Union

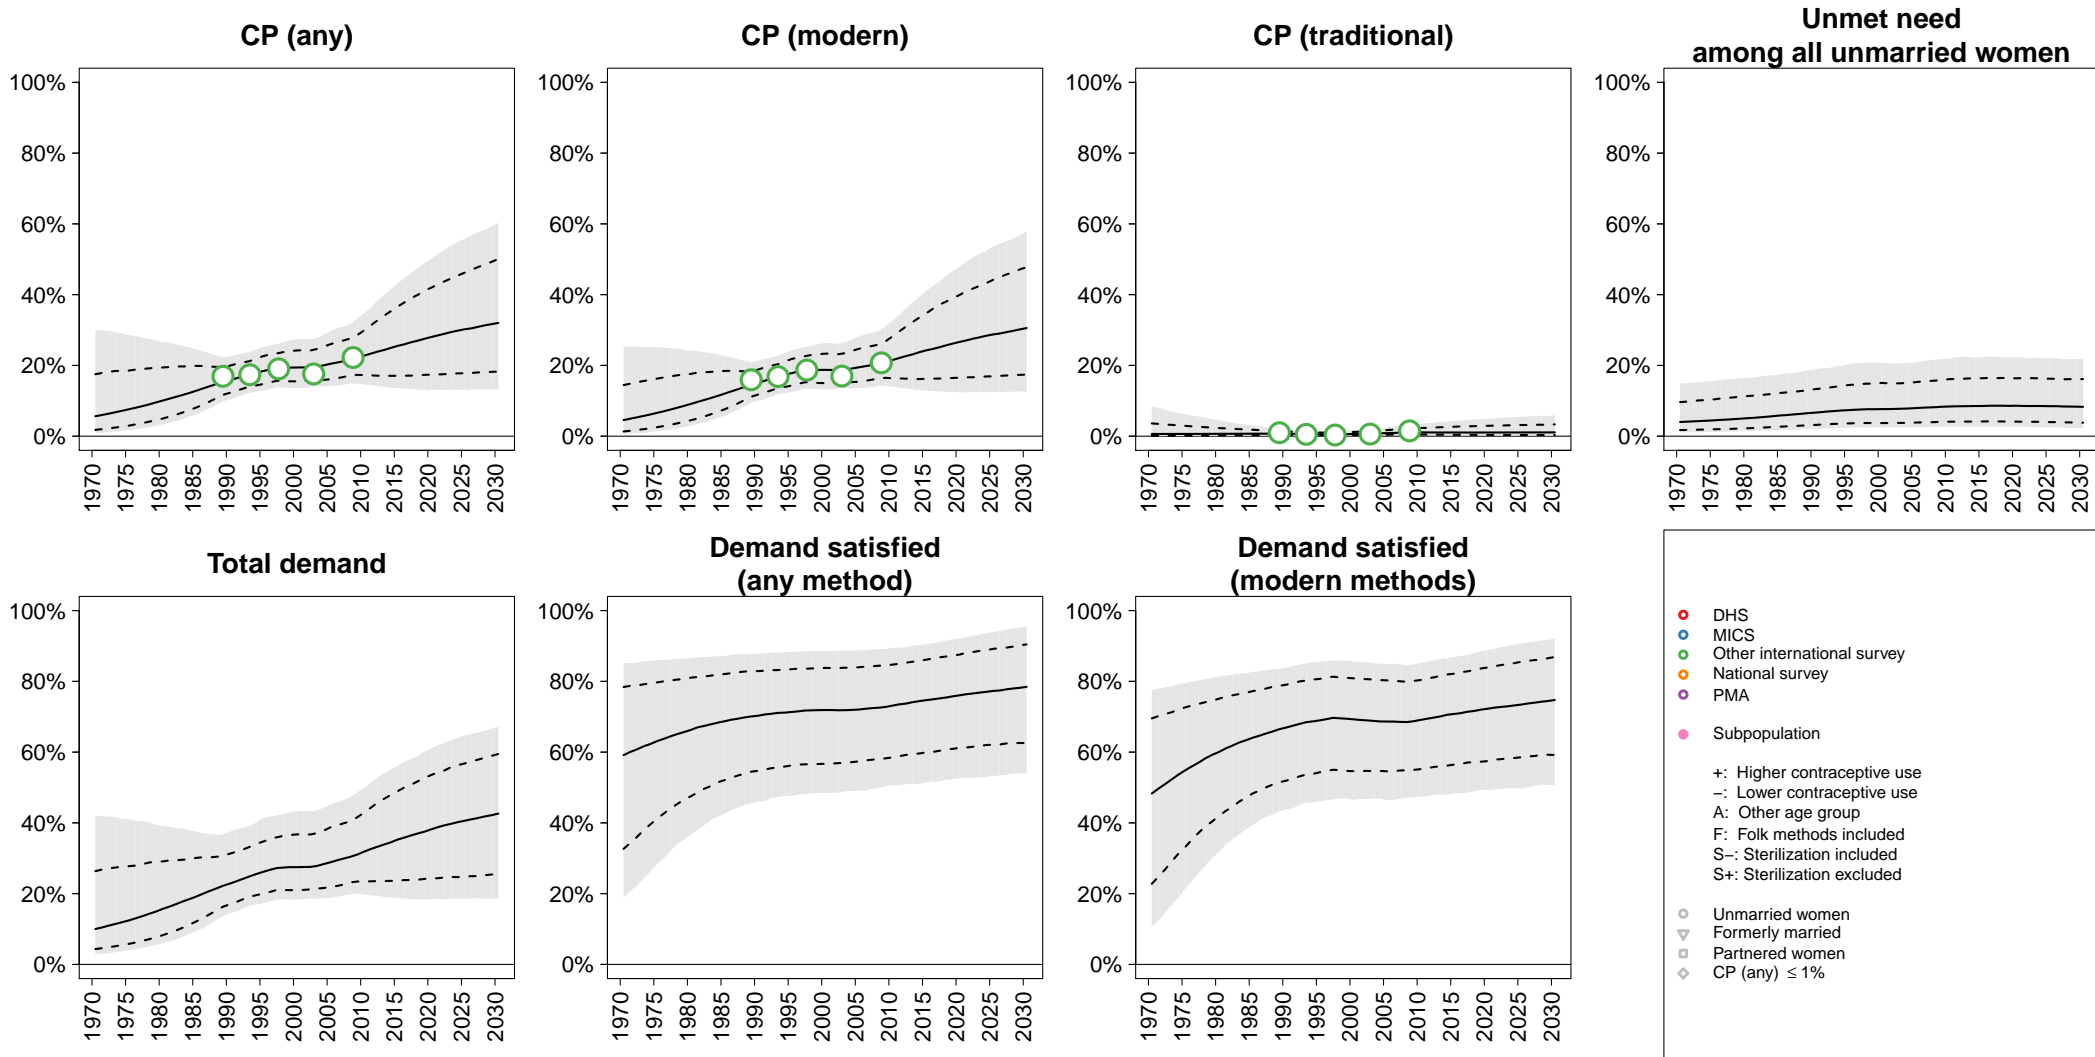



Japan (Eastern Asia, SA Group 1) --- Unmarried / Not In-Union

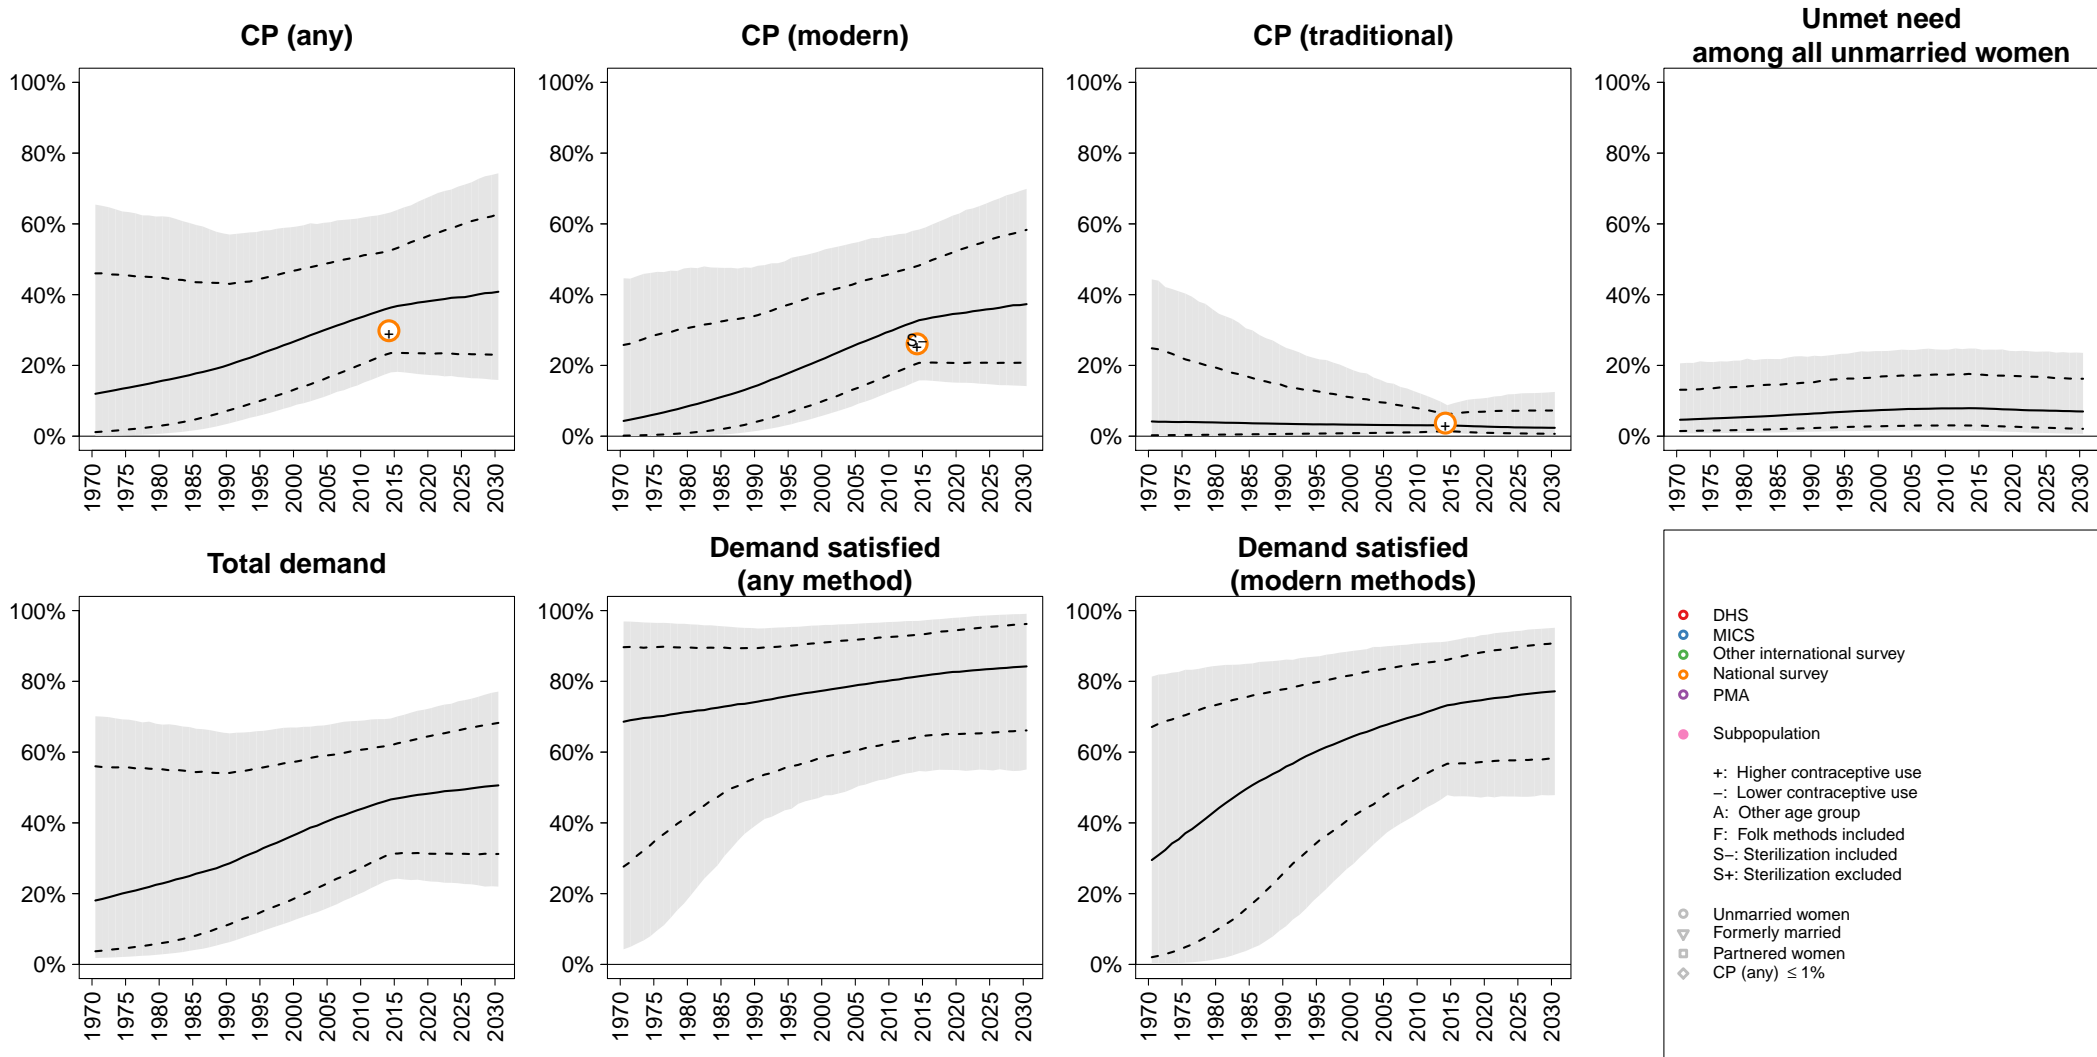

Jordan (Western Asia, SA Group 0) --- Unmarried / Not In-Union

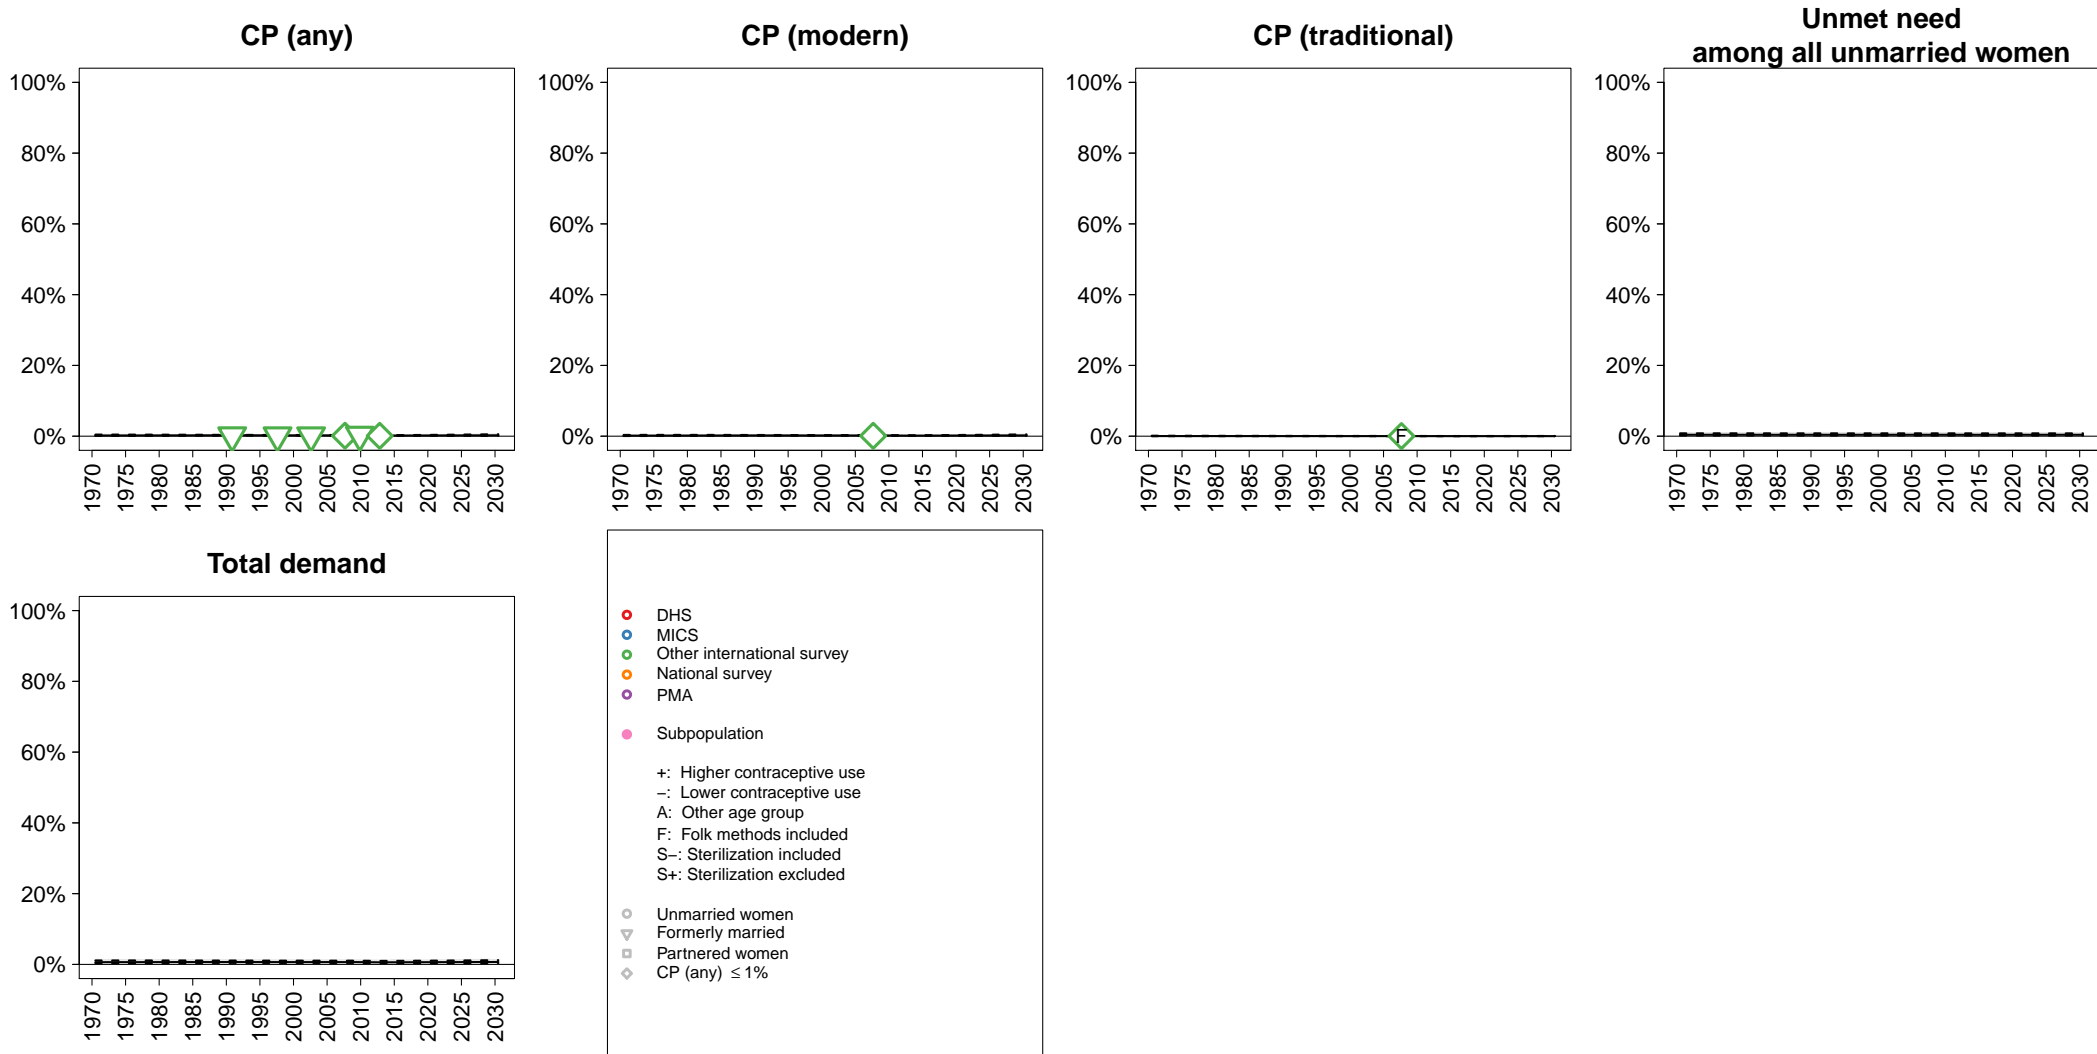

Kazakhstan (Central Asia, SA Group 1) --- Unmarried / Not In-Union

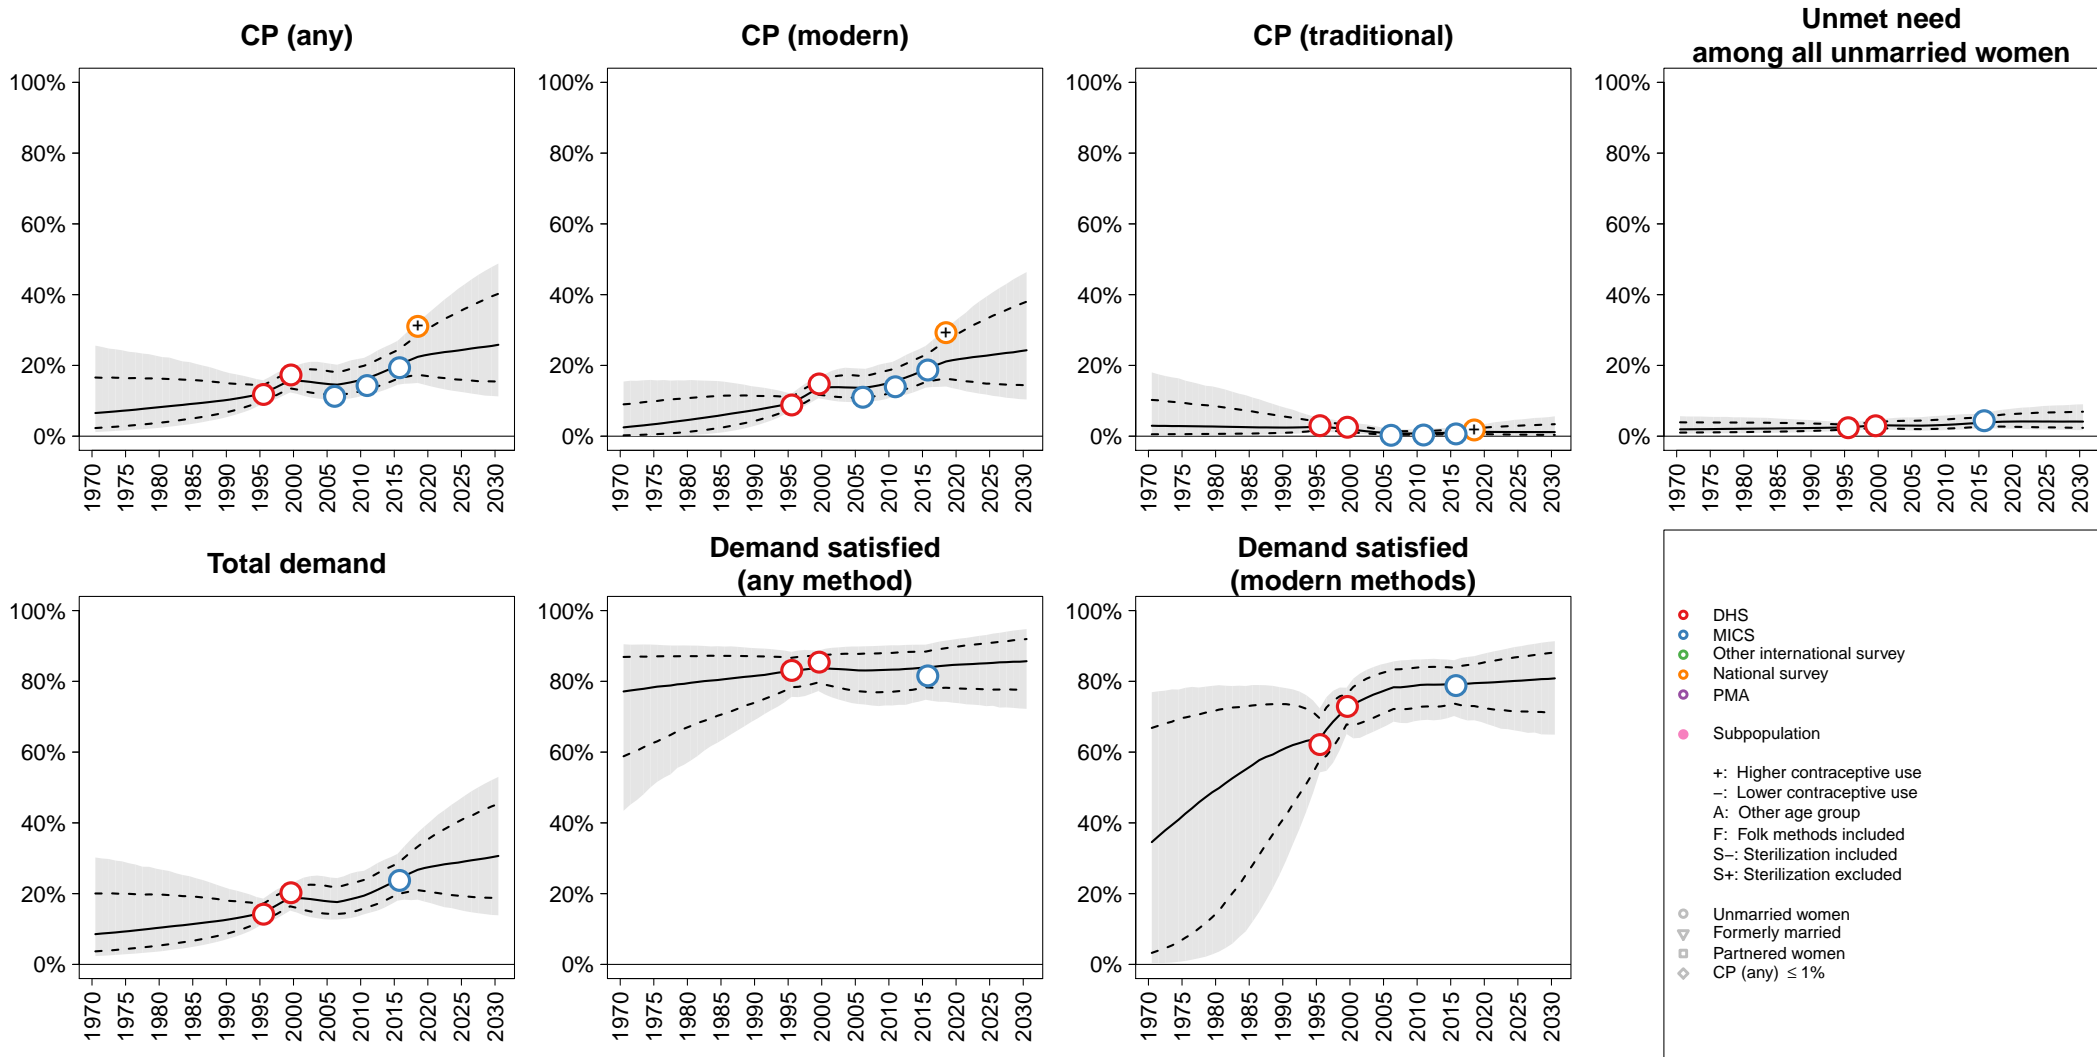

Kenya (Eastern Africa, SA Group 1) --- Unmarried / Not In-Union

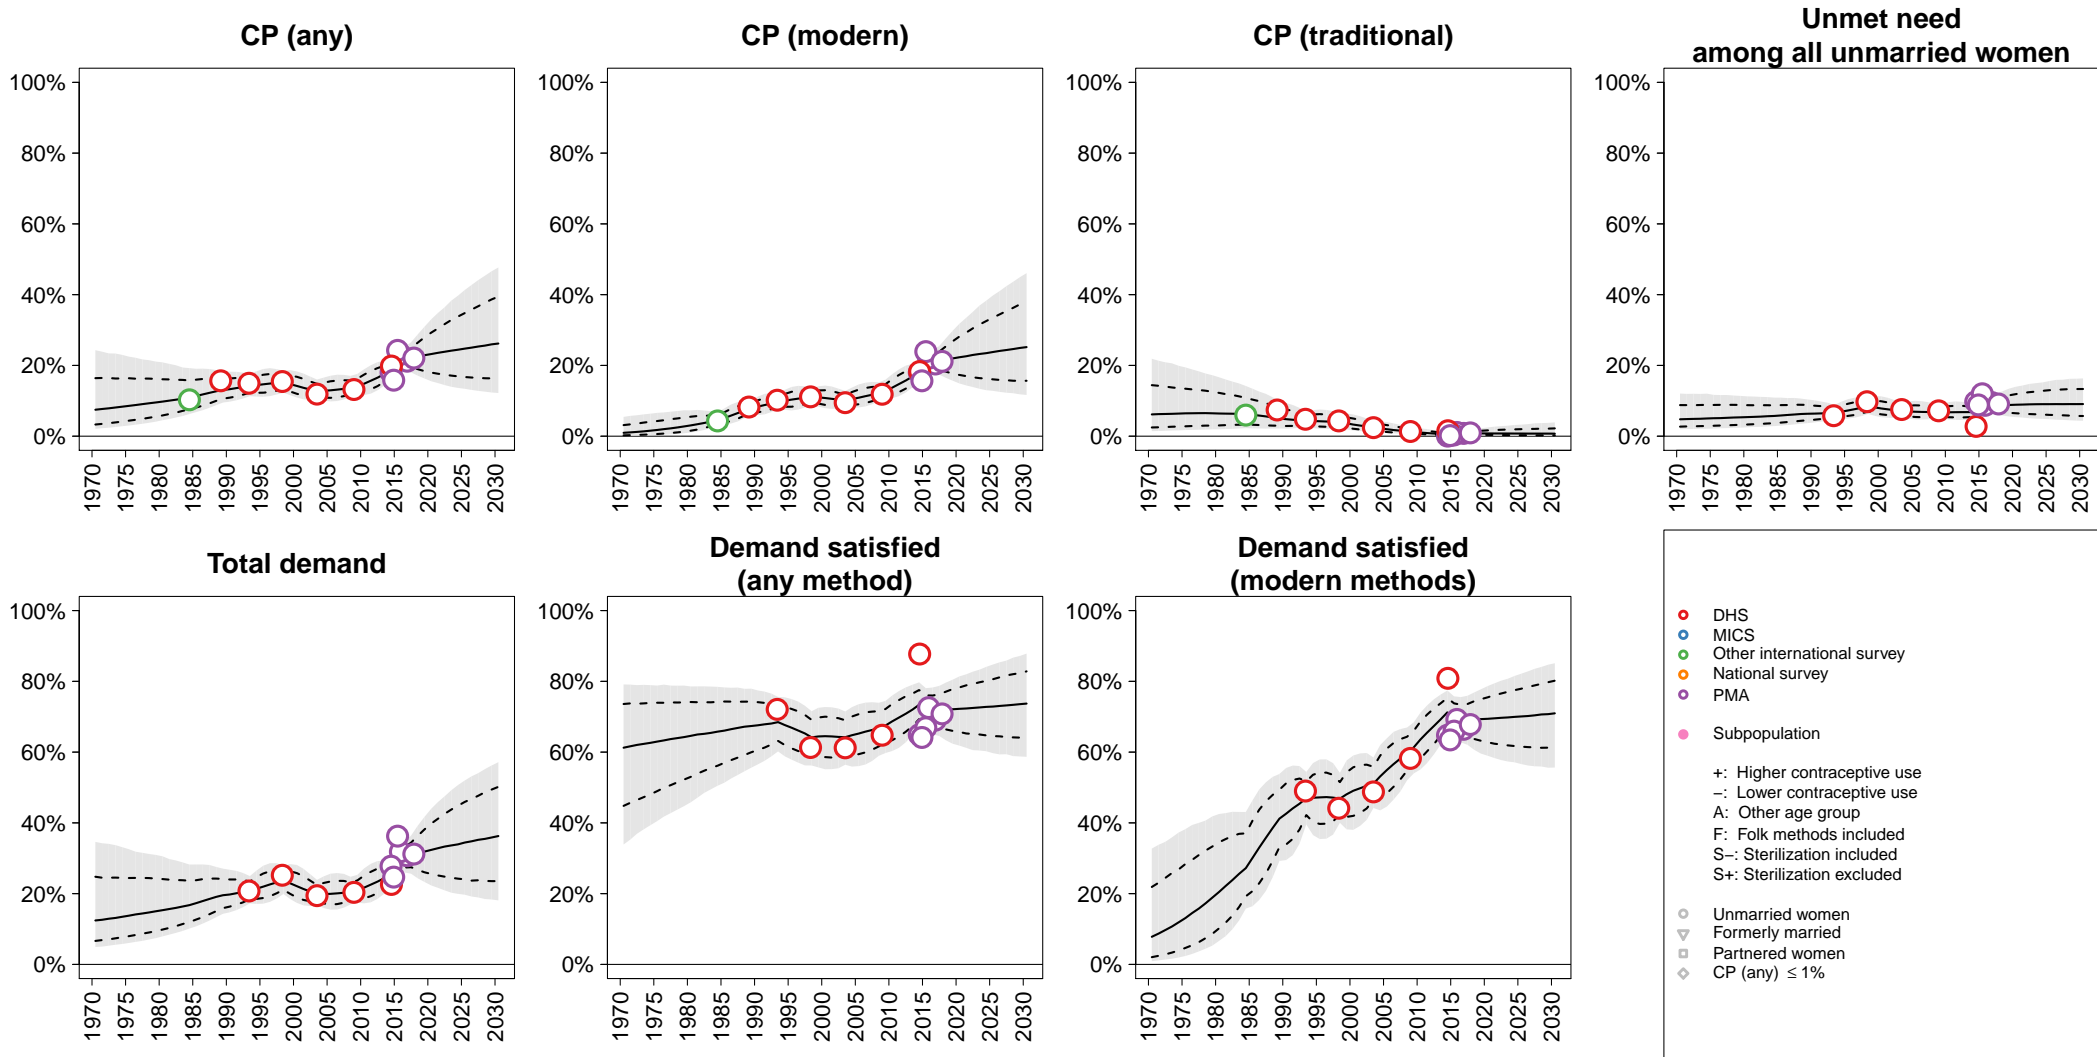

Kiribati (Micronesia, SA Group 1) --- Unmarried / Not In-Union

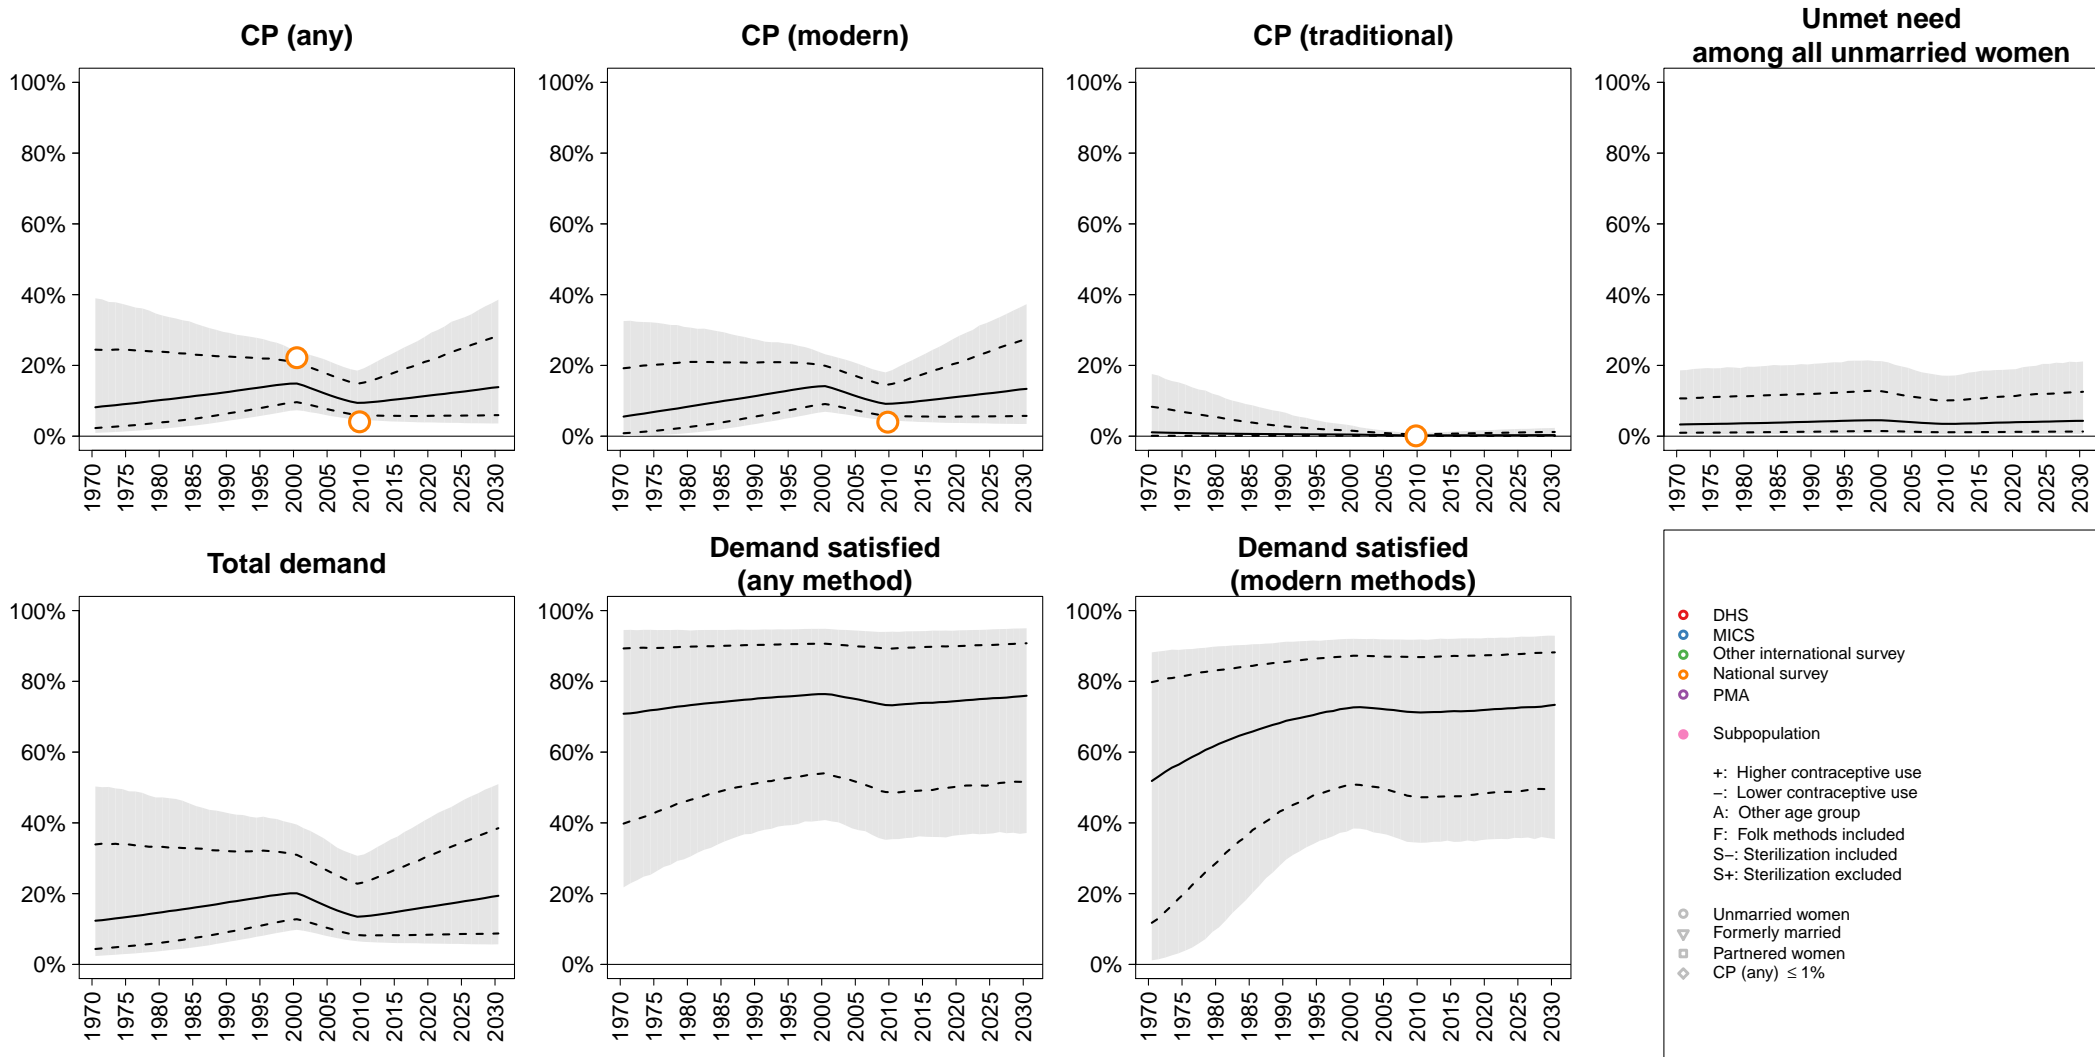

Kuwait (Western Asia, SA Group 0) --- Unmarried / Not In-Union

CP (any)

CP (modern)

CP (traditional)

Unmet need among all unmarried women

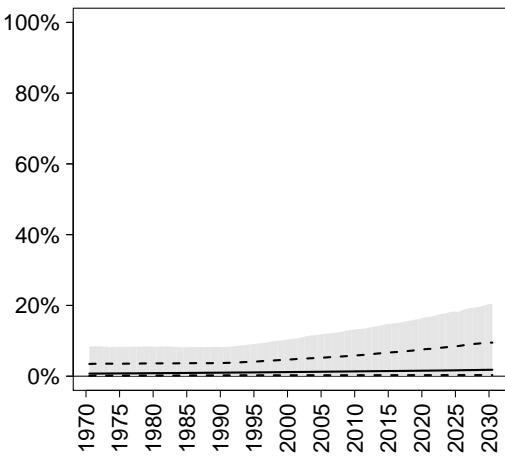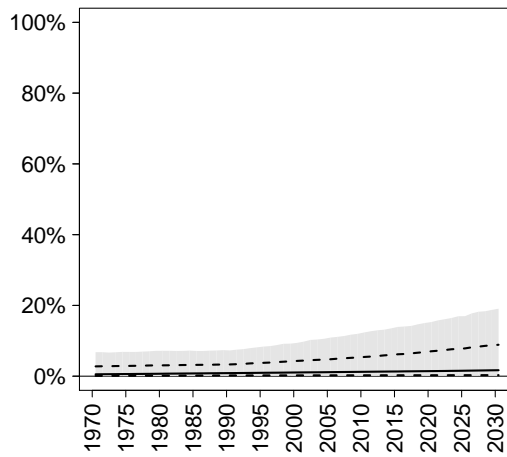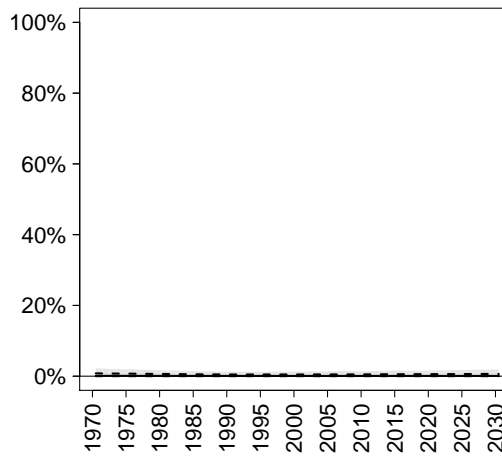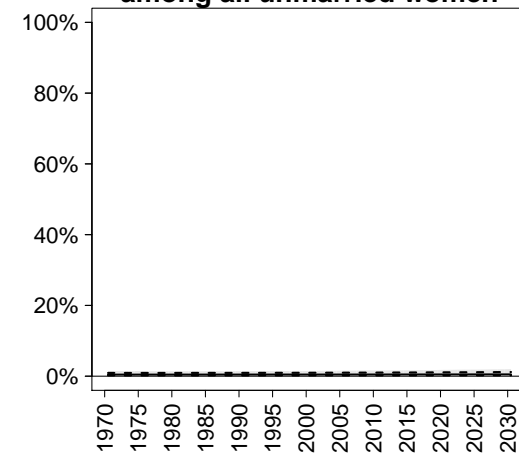

Total demand

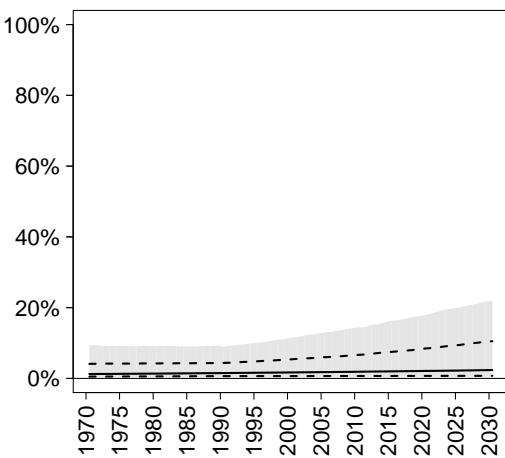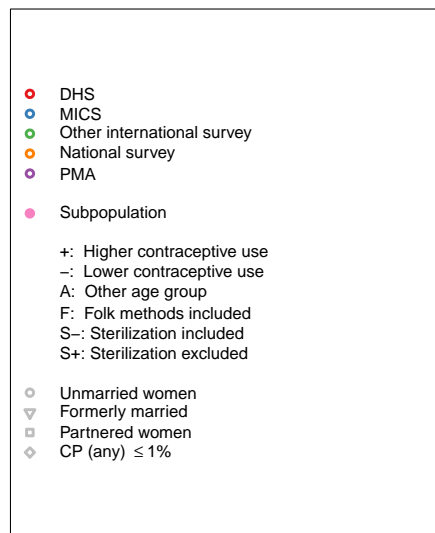

Kyrgyzstan (Central Asia, SA Group 1) --- Unmarried / Not In-Union

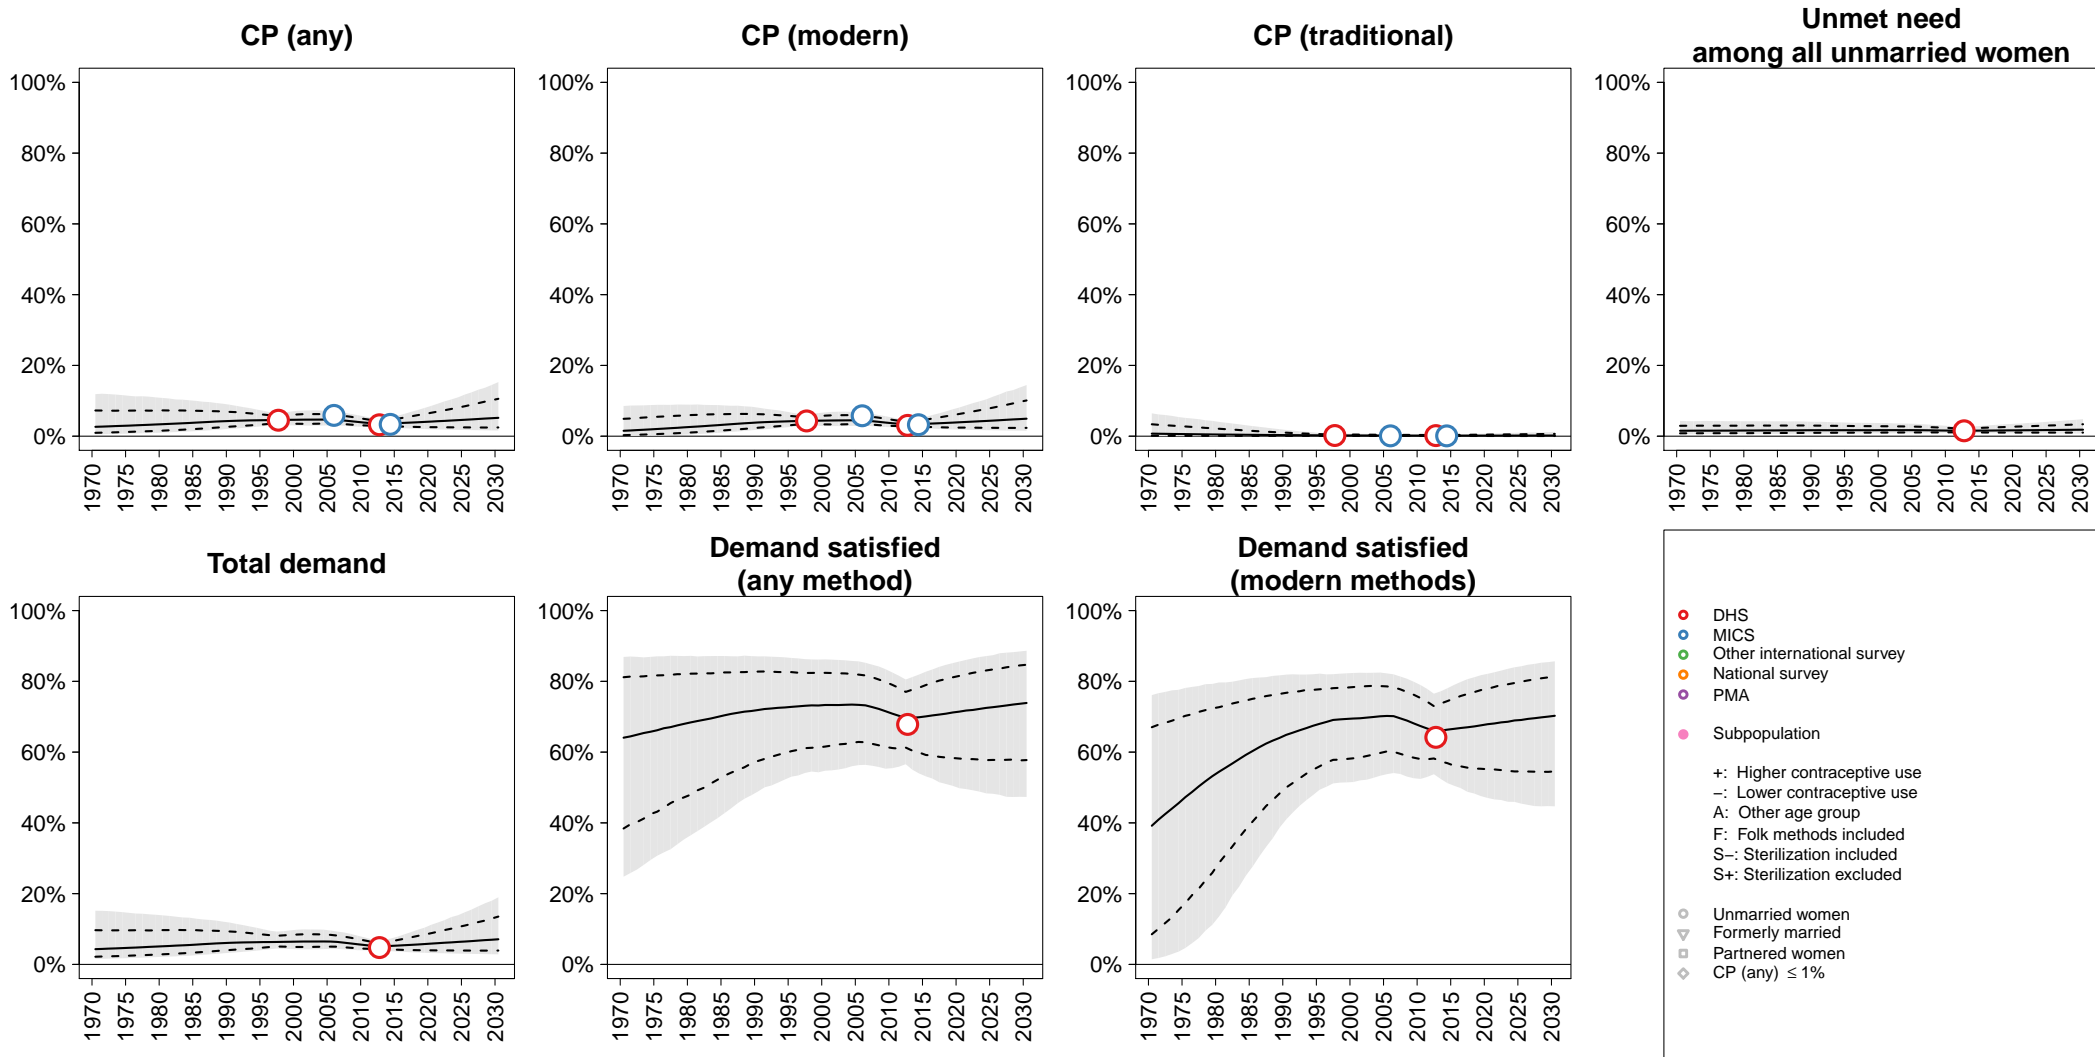

Lao People's Dem. Republic (South-eastern Asia, SA Group 0) --- Unmarried / Not In-Union

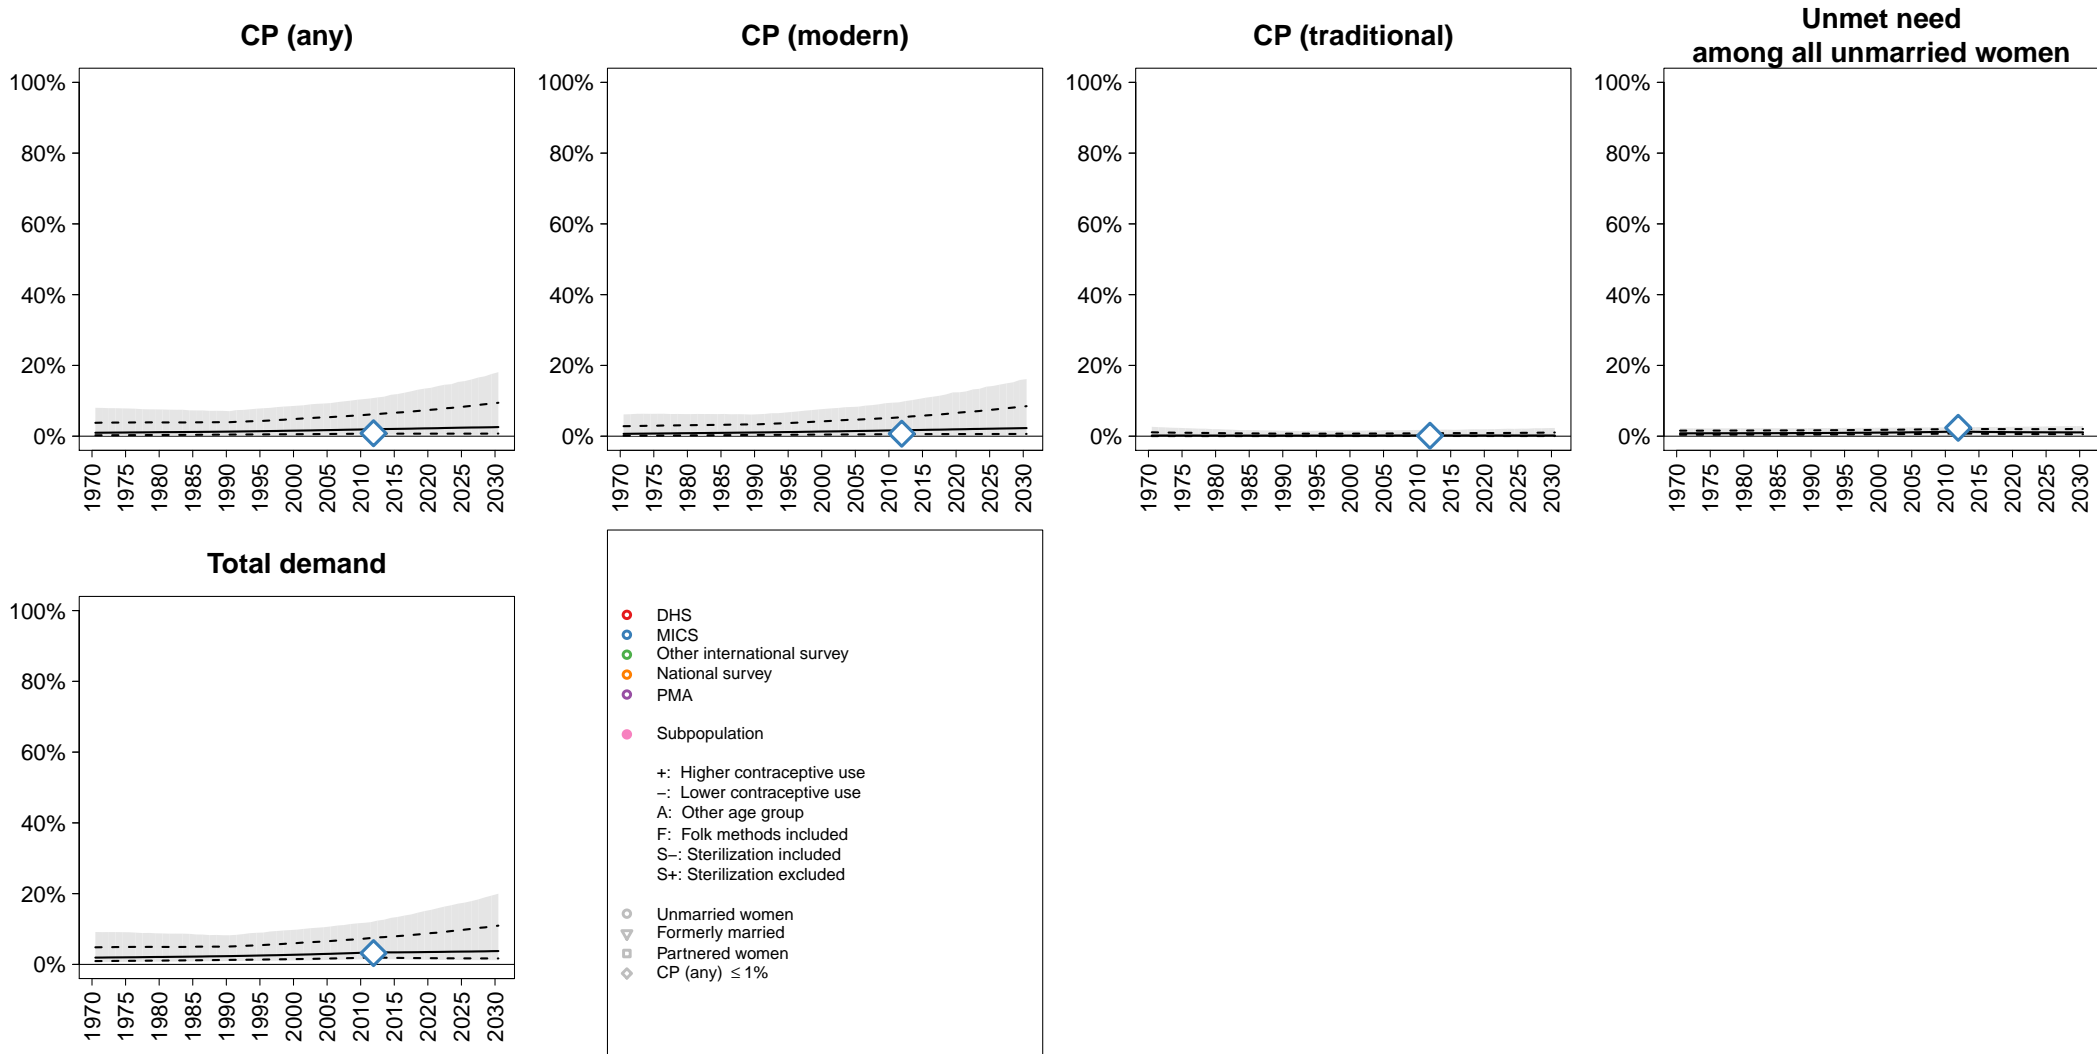



Latvia (Northern Europe, SA Group 1) --- Unmarried / Not In-Union

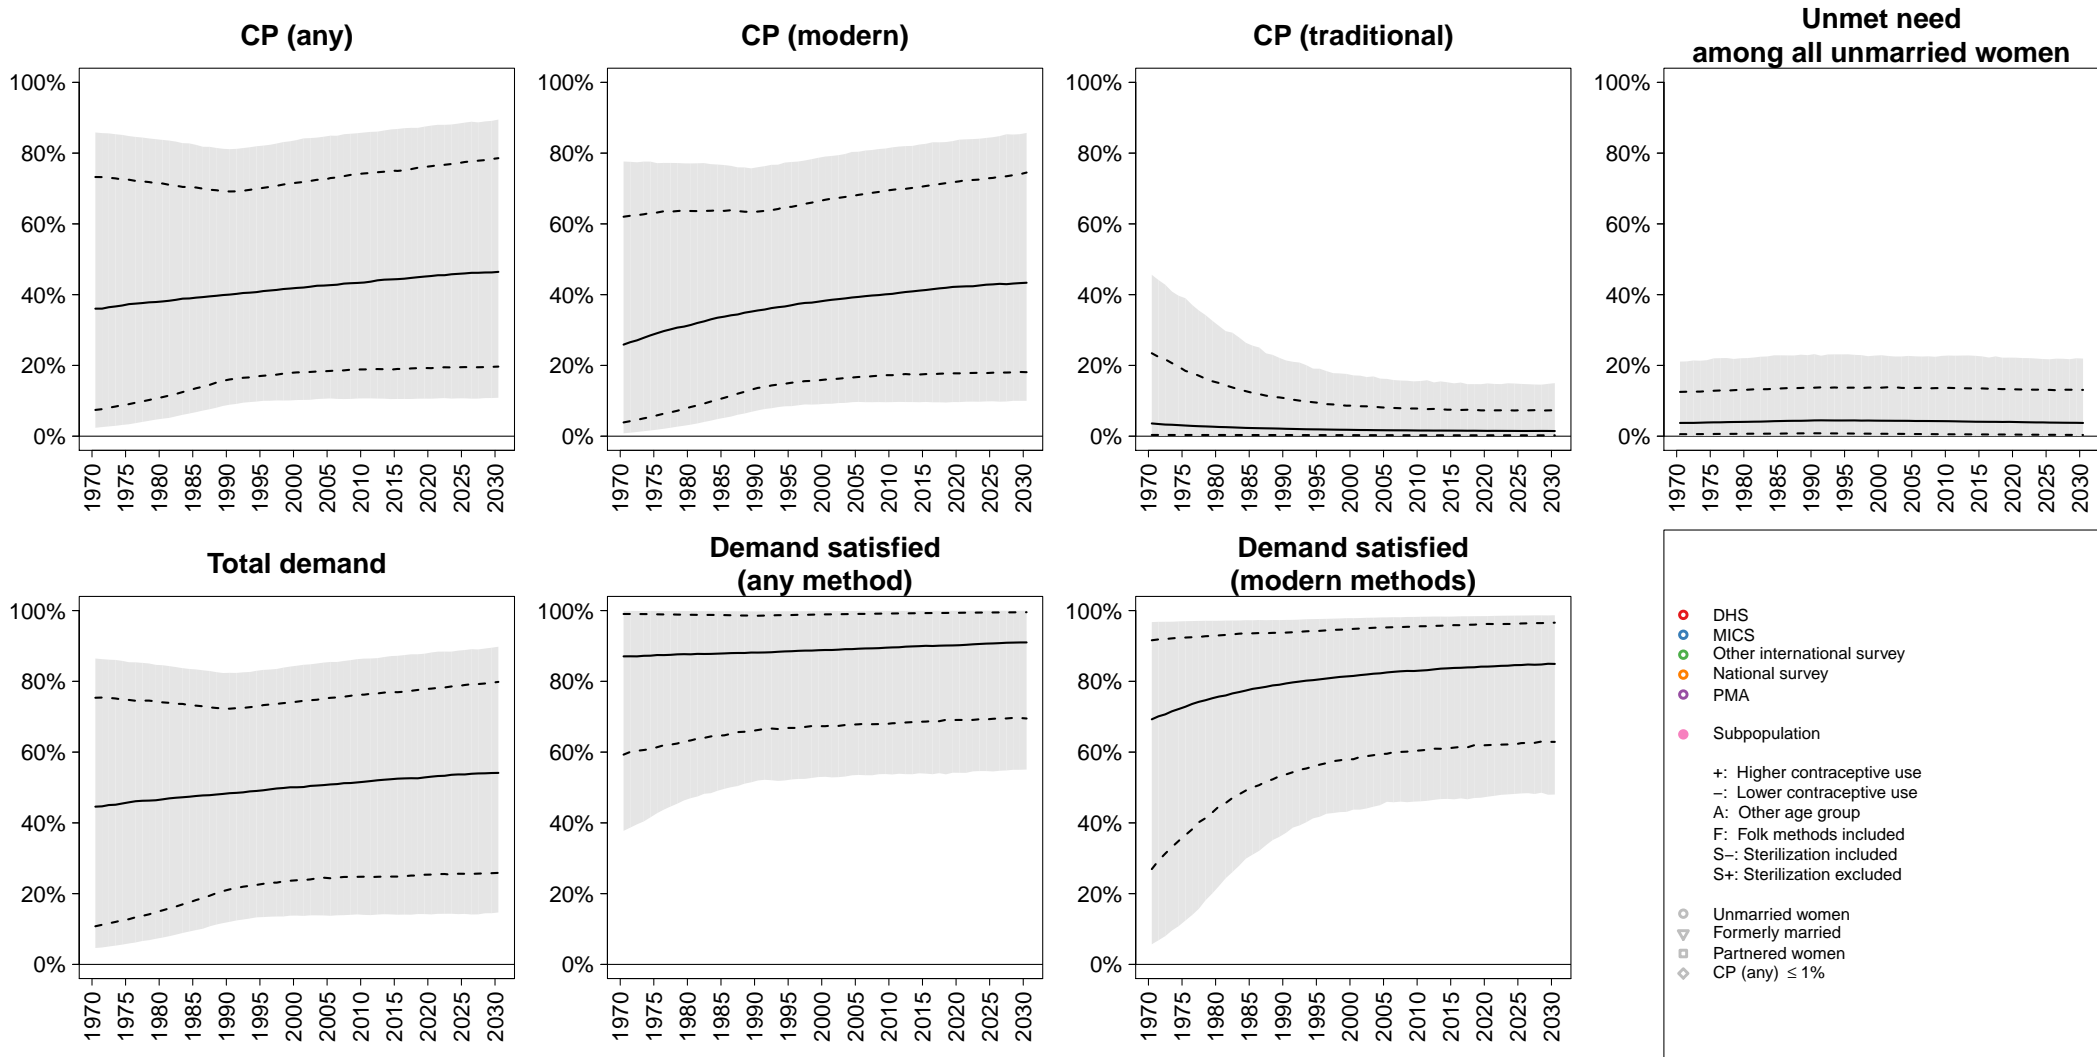

Lebanon (Western Asia, SA Group 0) --- Unmarried / Not In-Union

CP (any)

CP (modern)

CP (traditional)

Unmet need among all unmarried women

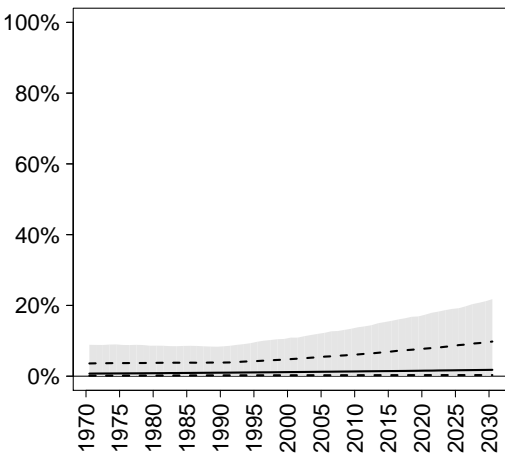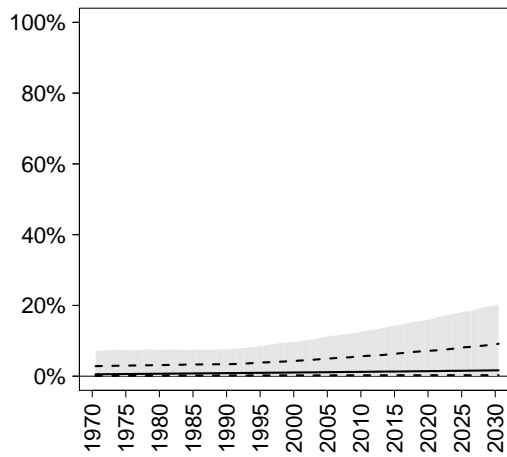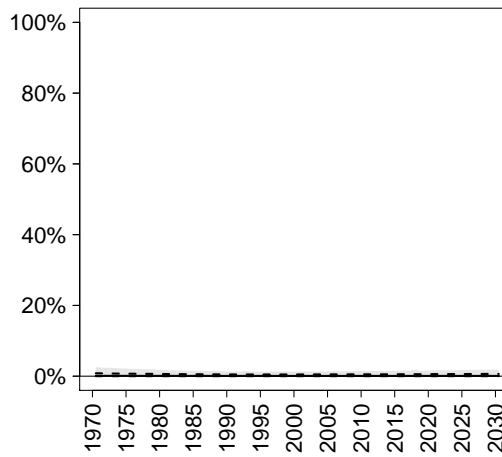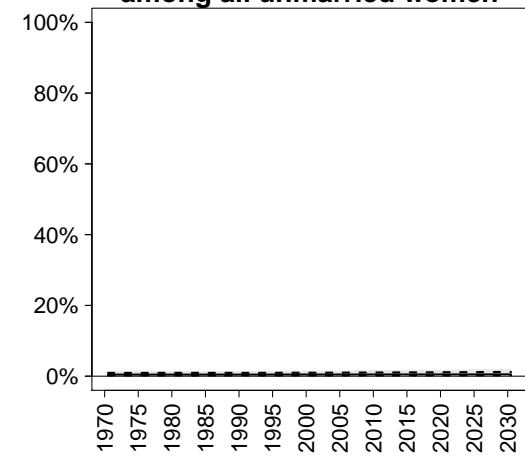

Total demand

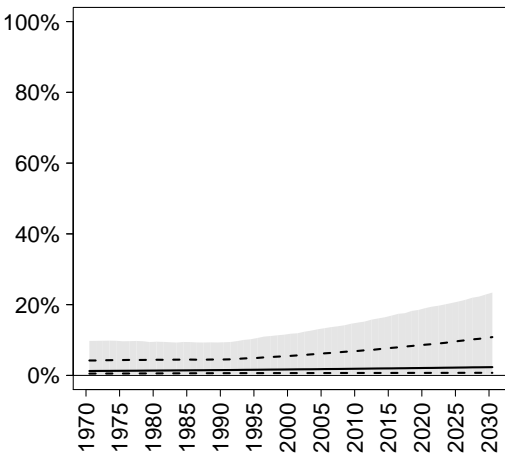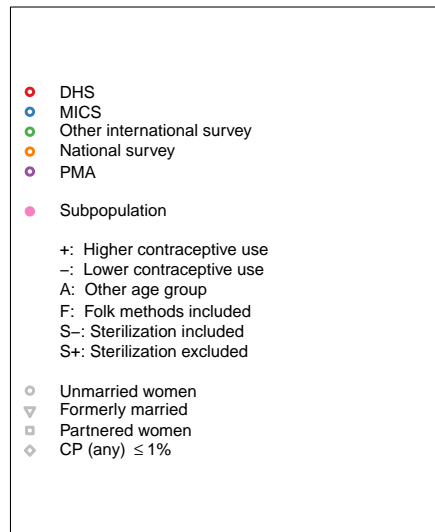

Lesotho (Southern Africa, SA Group 1) --- Unmarried / Not In-Union

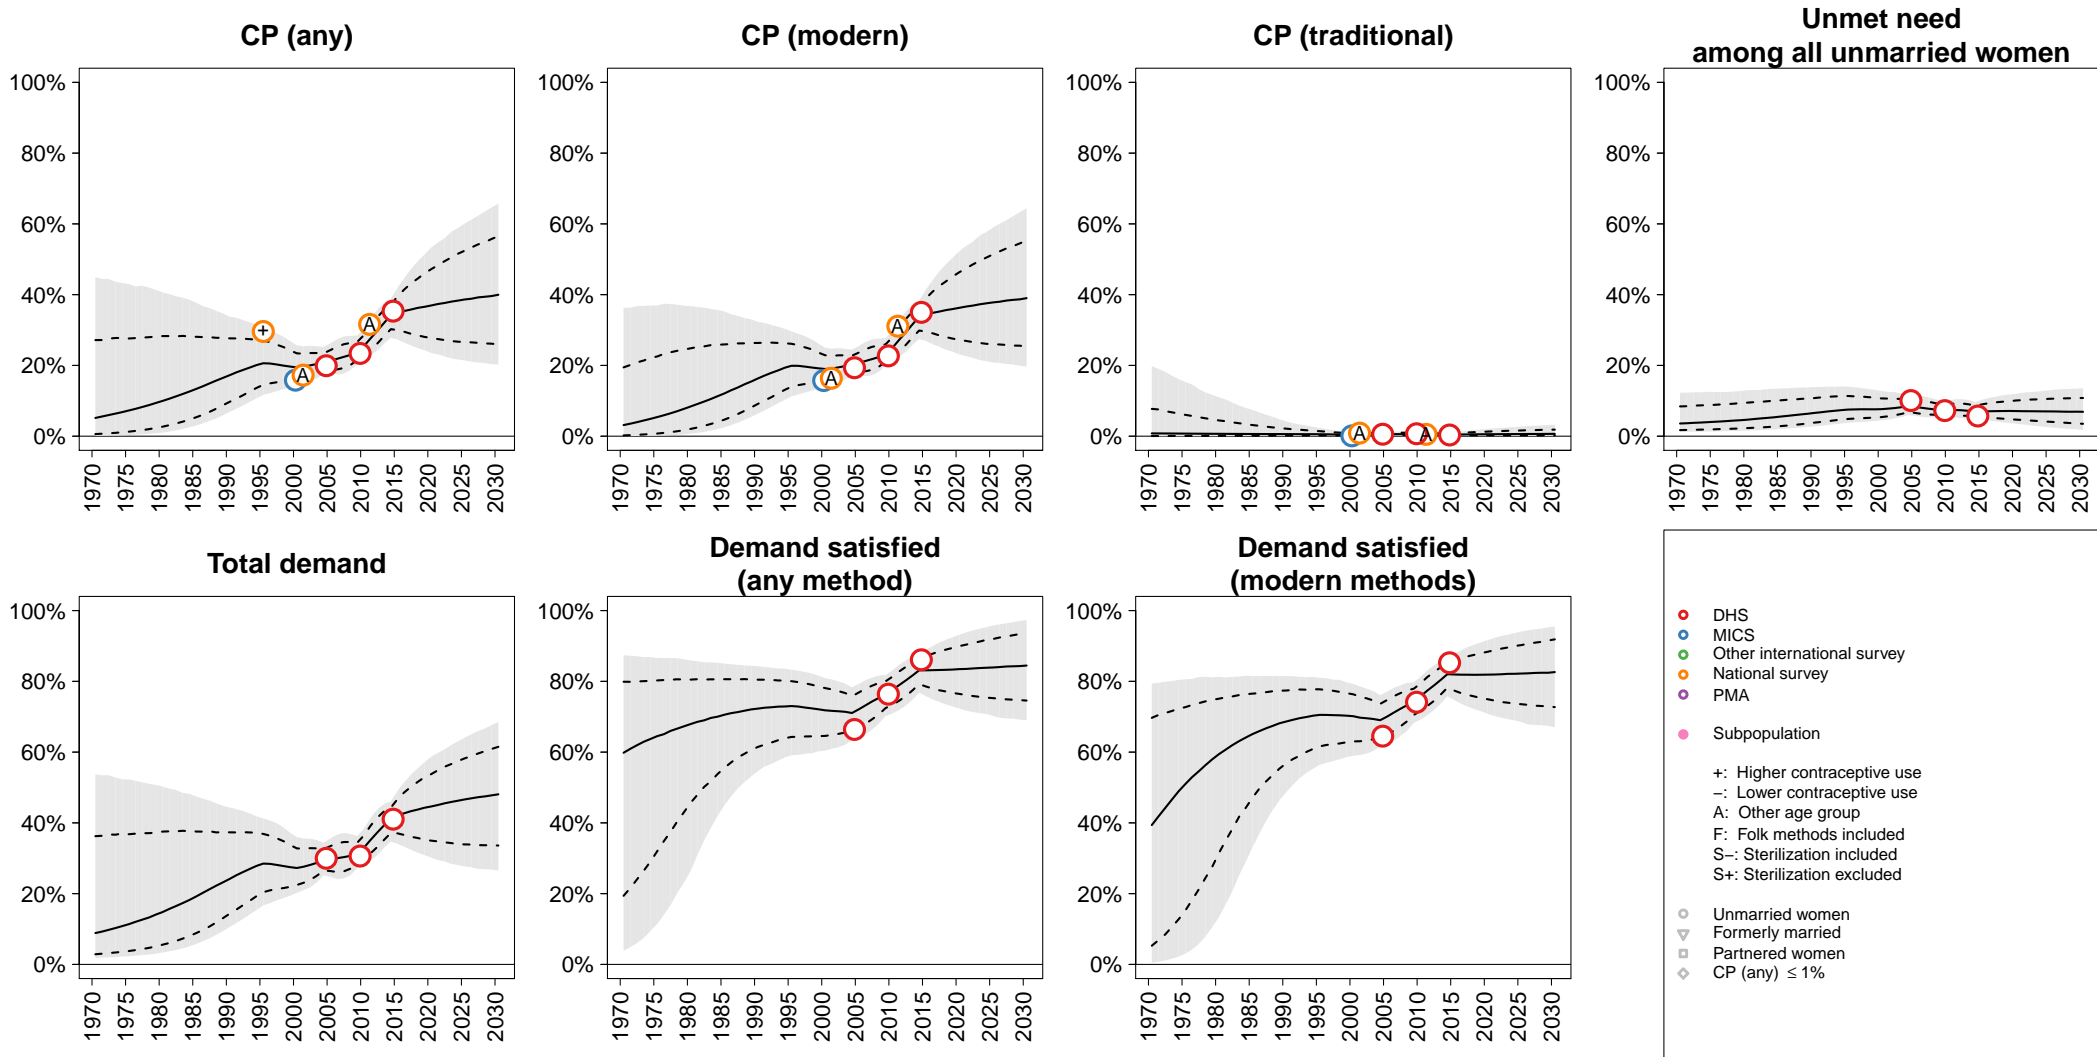

Liberia (Western Africa, SA Group 1) --- Unmarried / Not In-Union

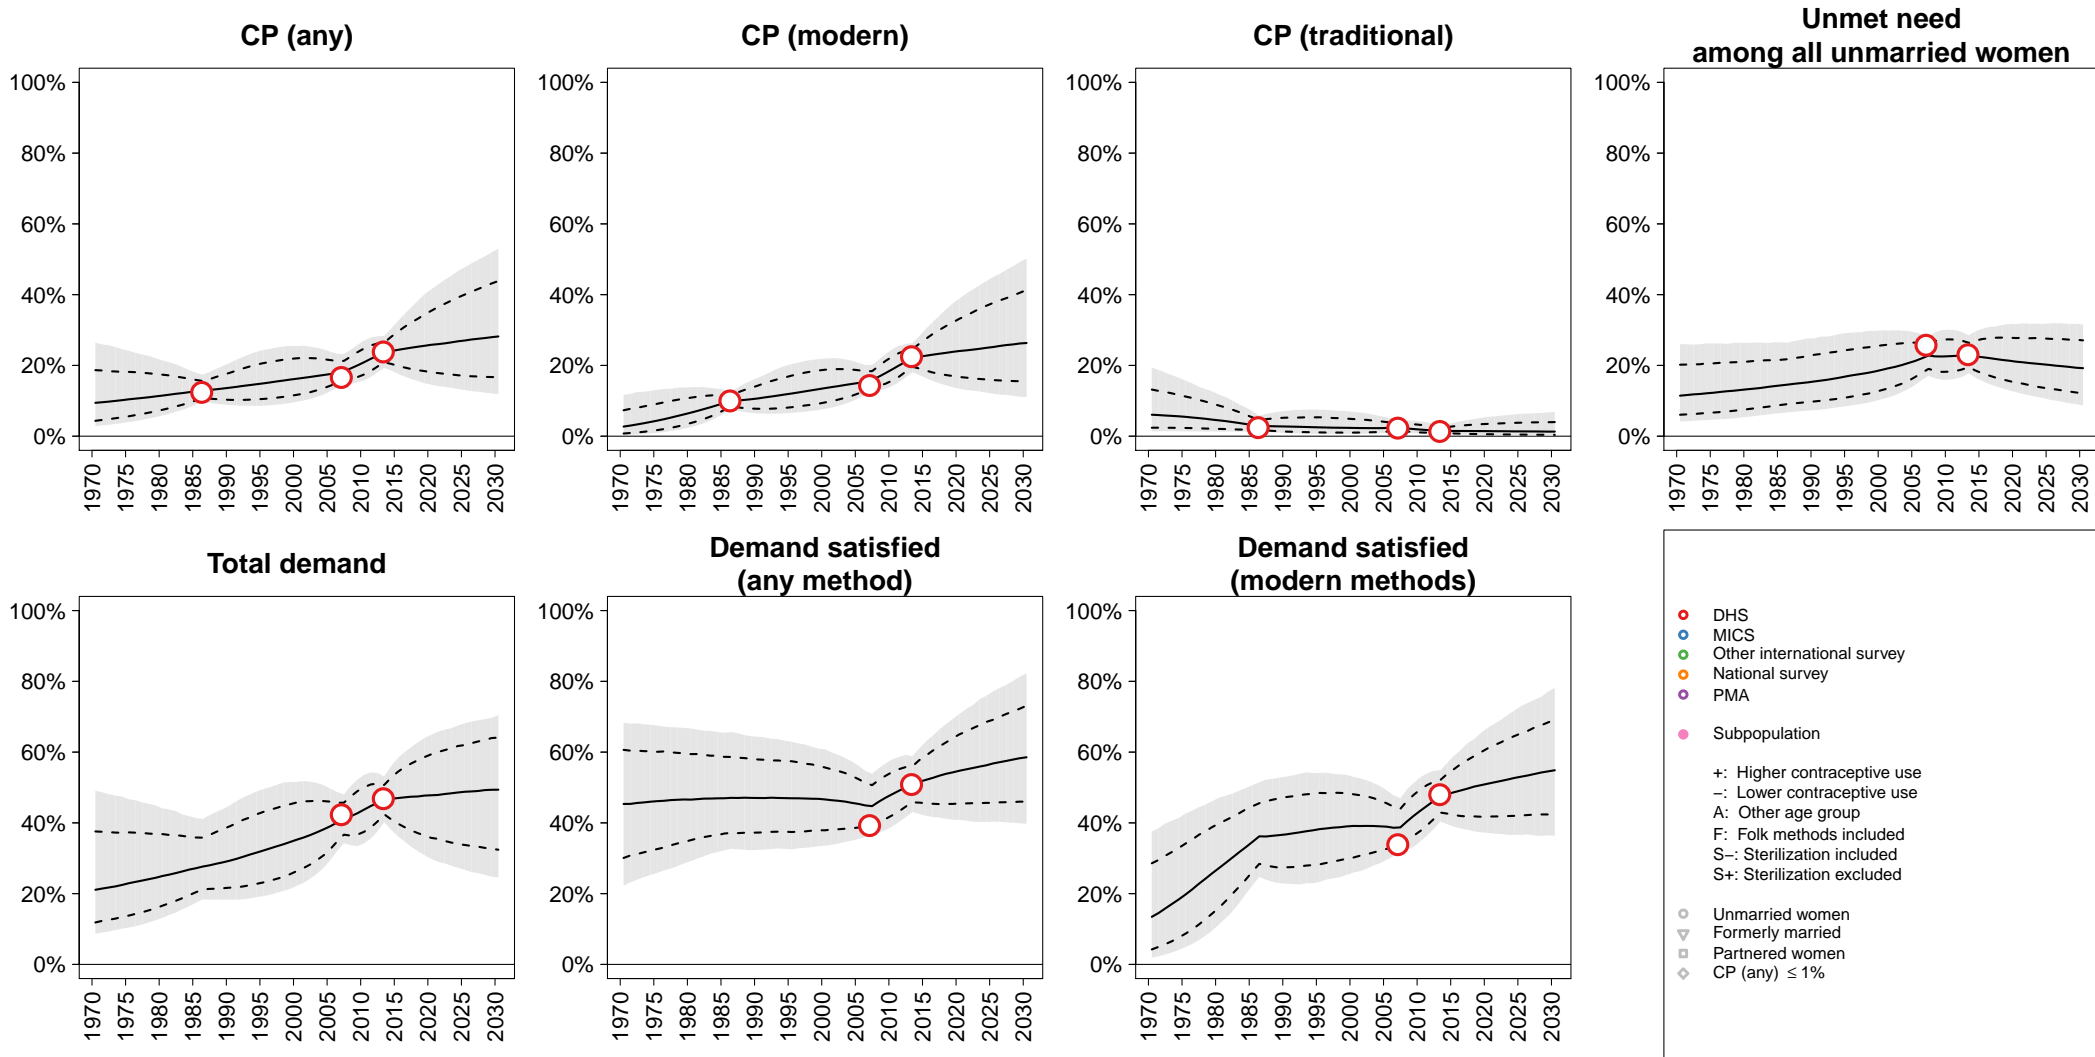

Libya (Northern Africa, SA Group 0) --- Unmarried / Not In-Union

CP (any)

CP (modern)

CP (traditional)

Unmet need among all unmarried women

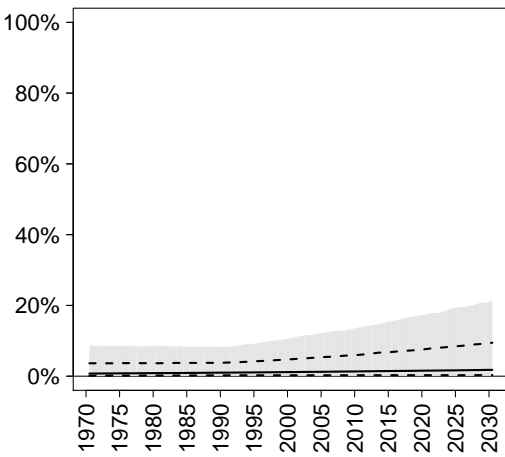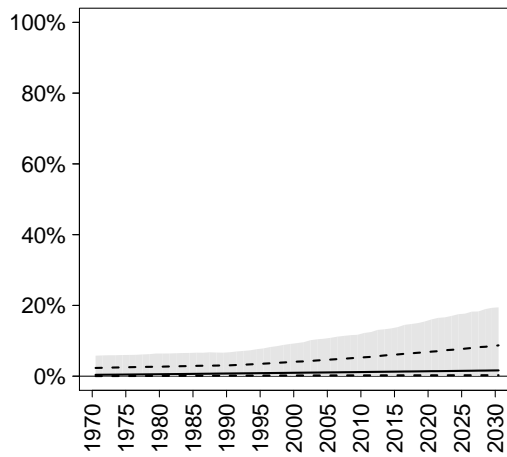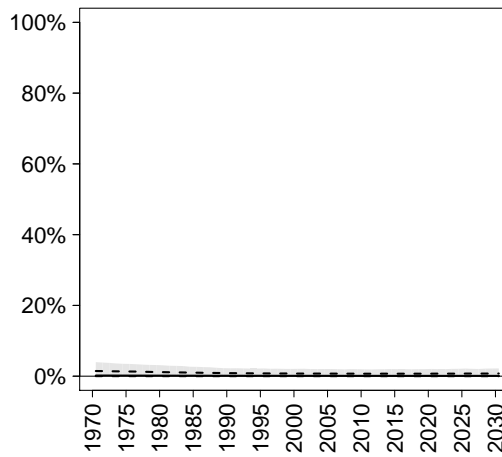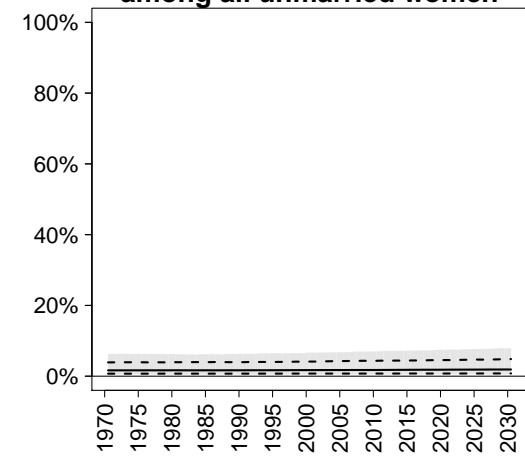

Total demand

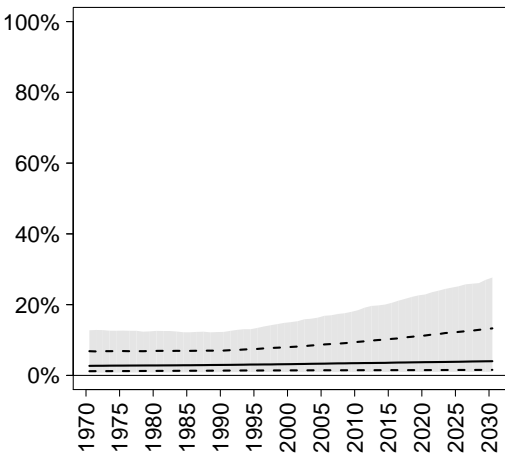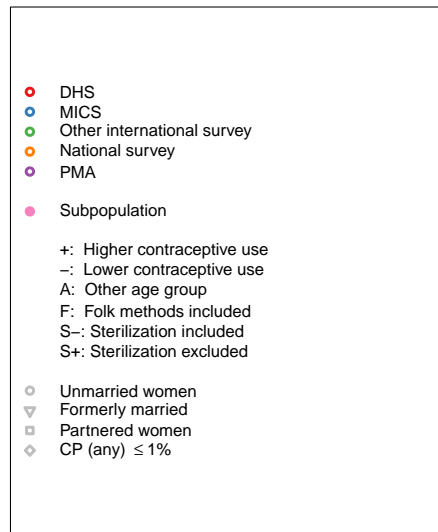

Lithuania (Northern Europe, SA Group 1) --- Unmarried / Not In-Union

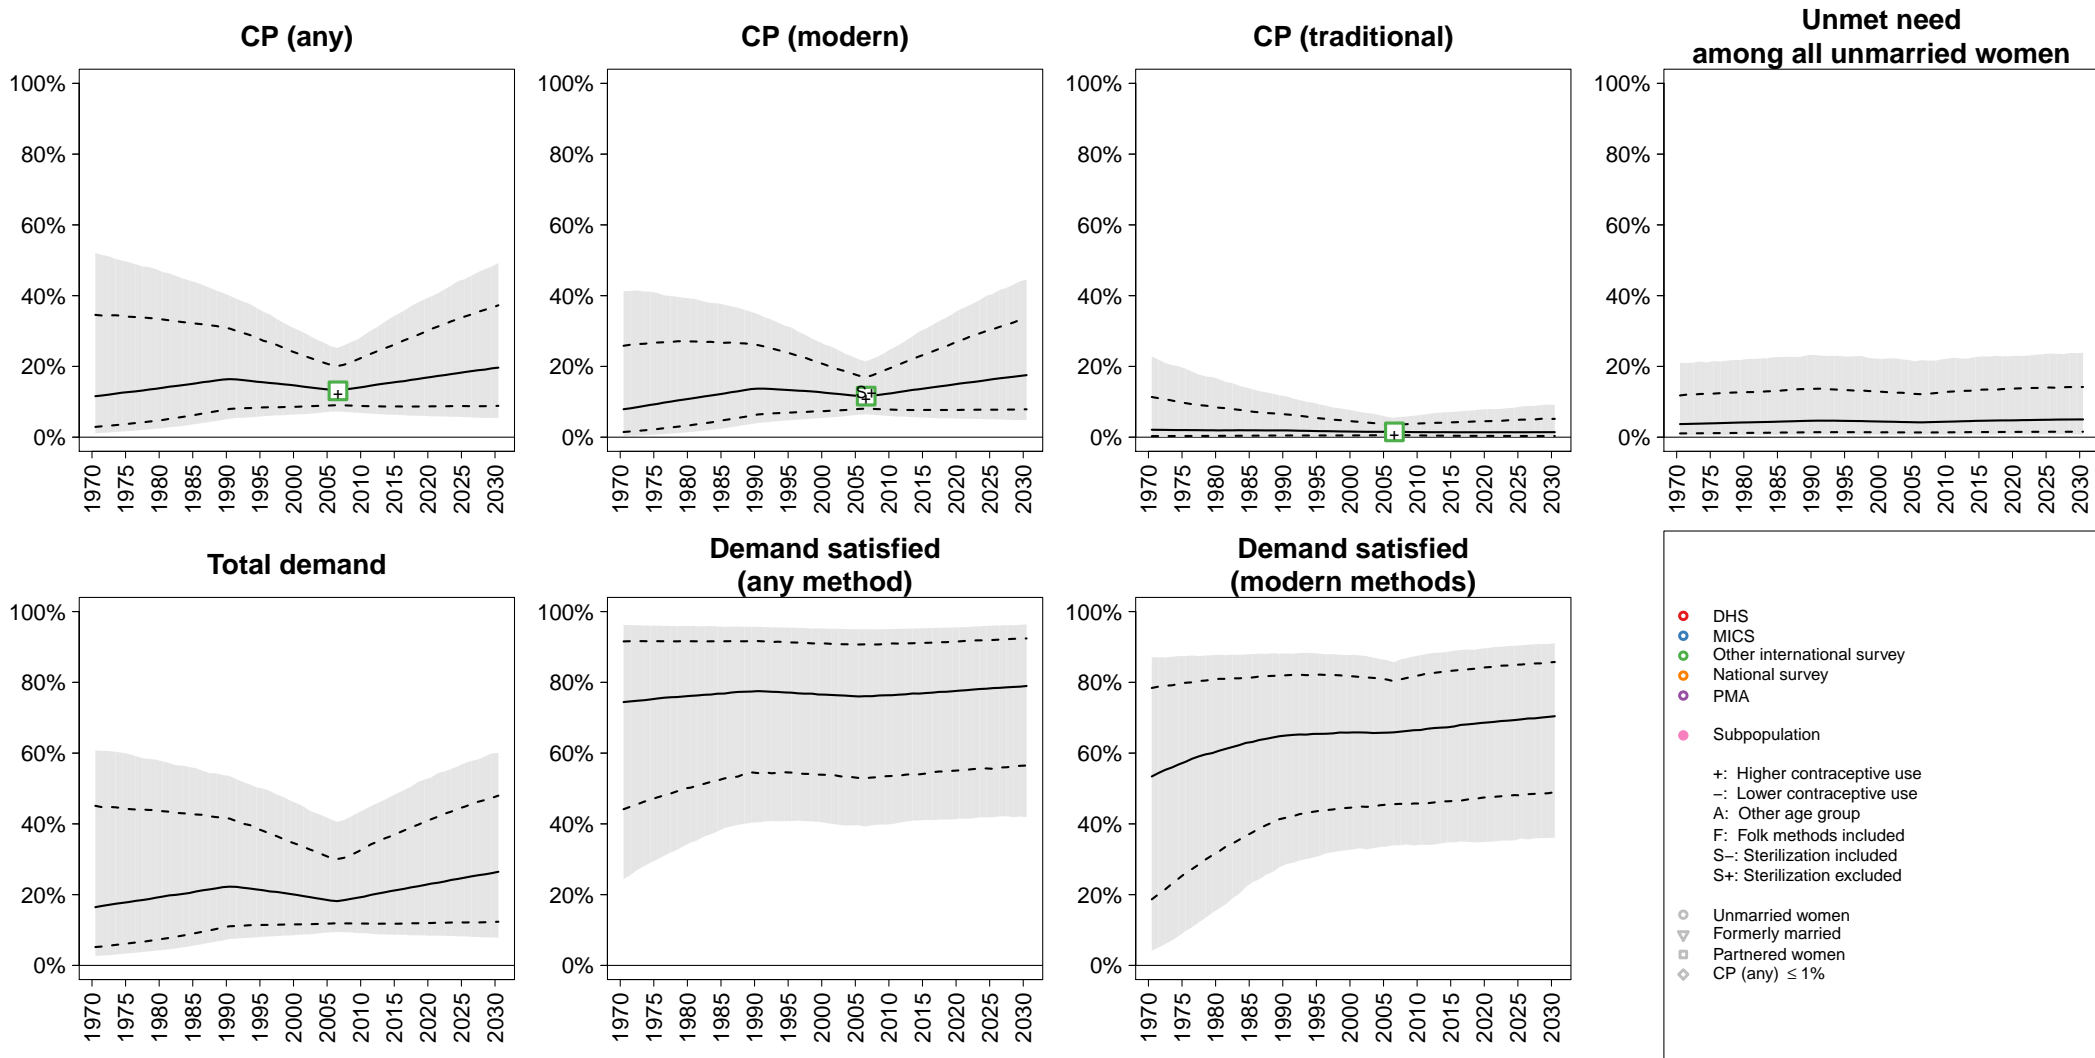

Madagascar (Eastern Africa, SA Group 1) --- Unmarried / Not In–Union

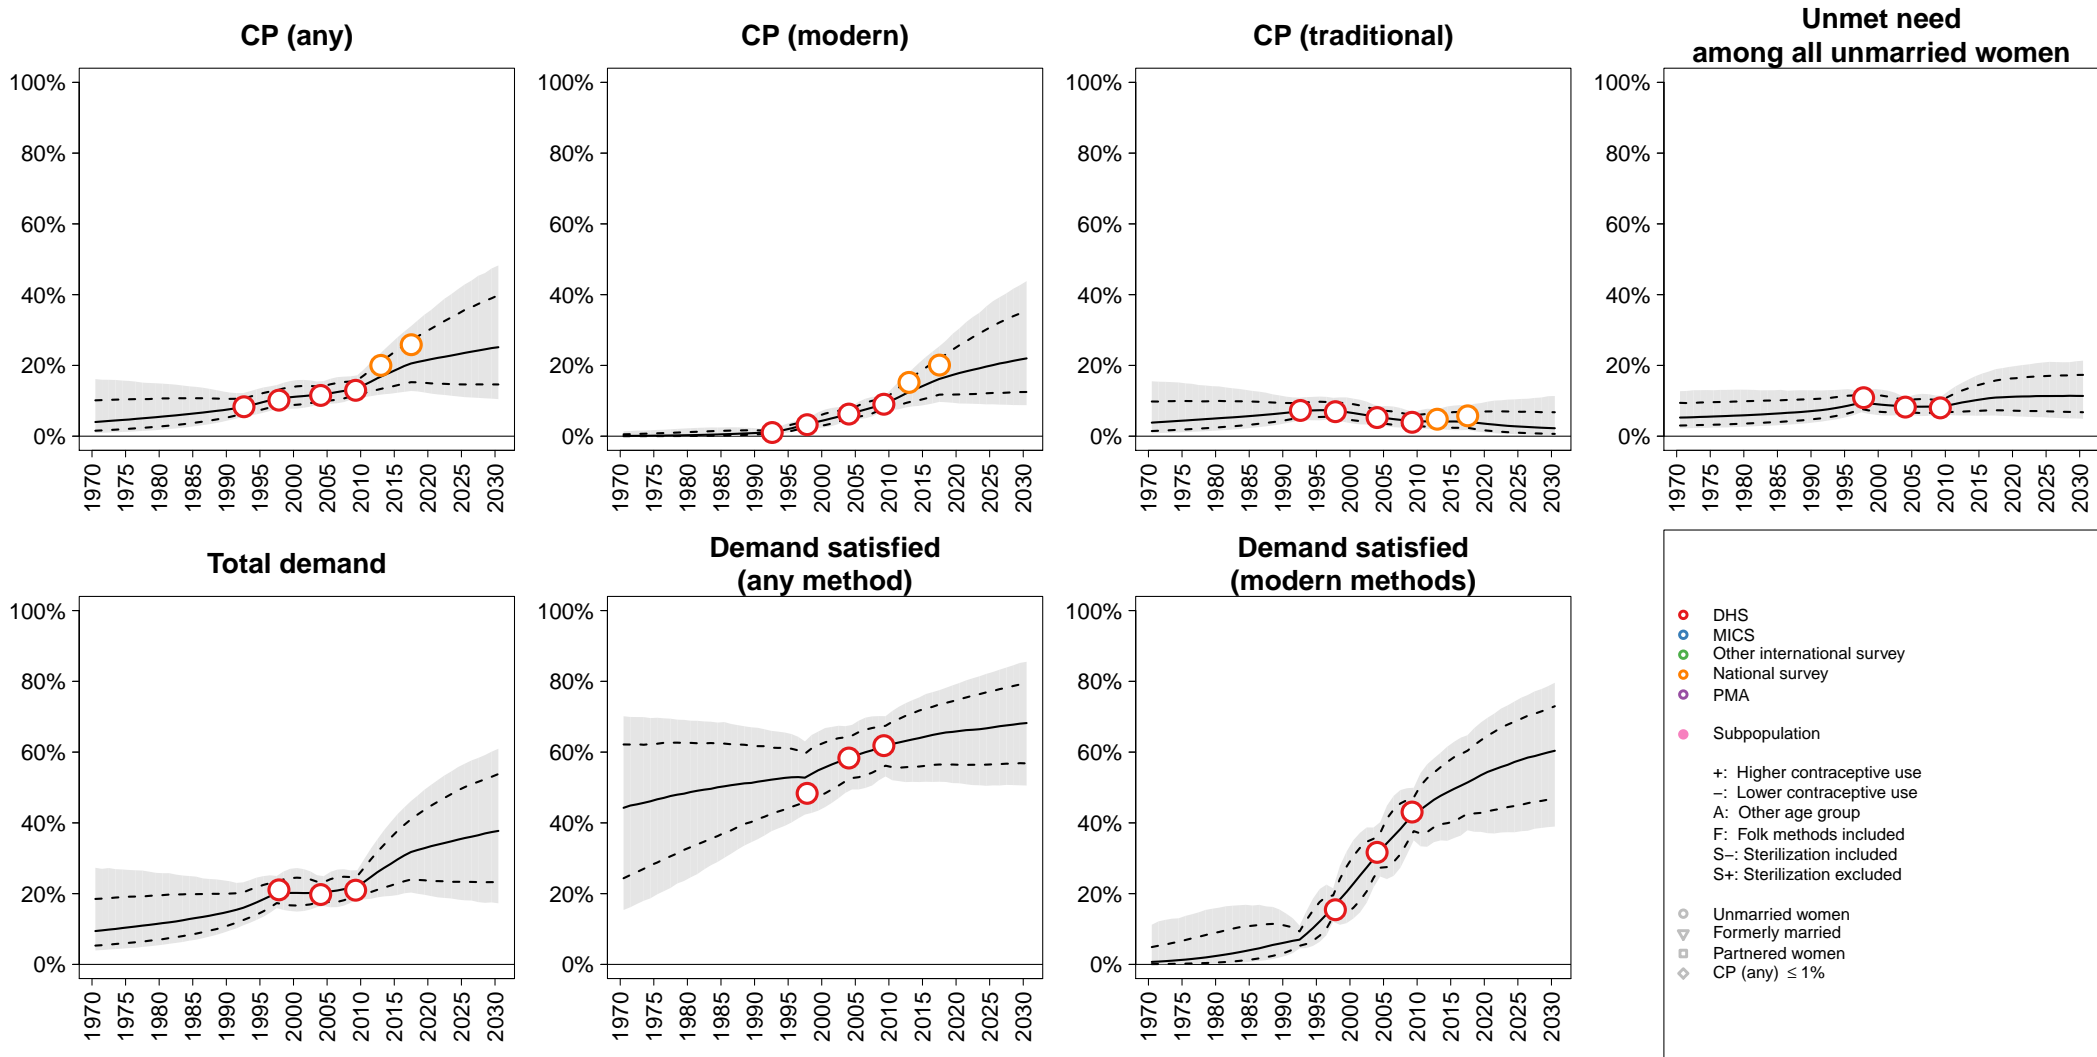

Malawi (Eastern Africa, SA Group 1) --- Unmarried / Not In-Union

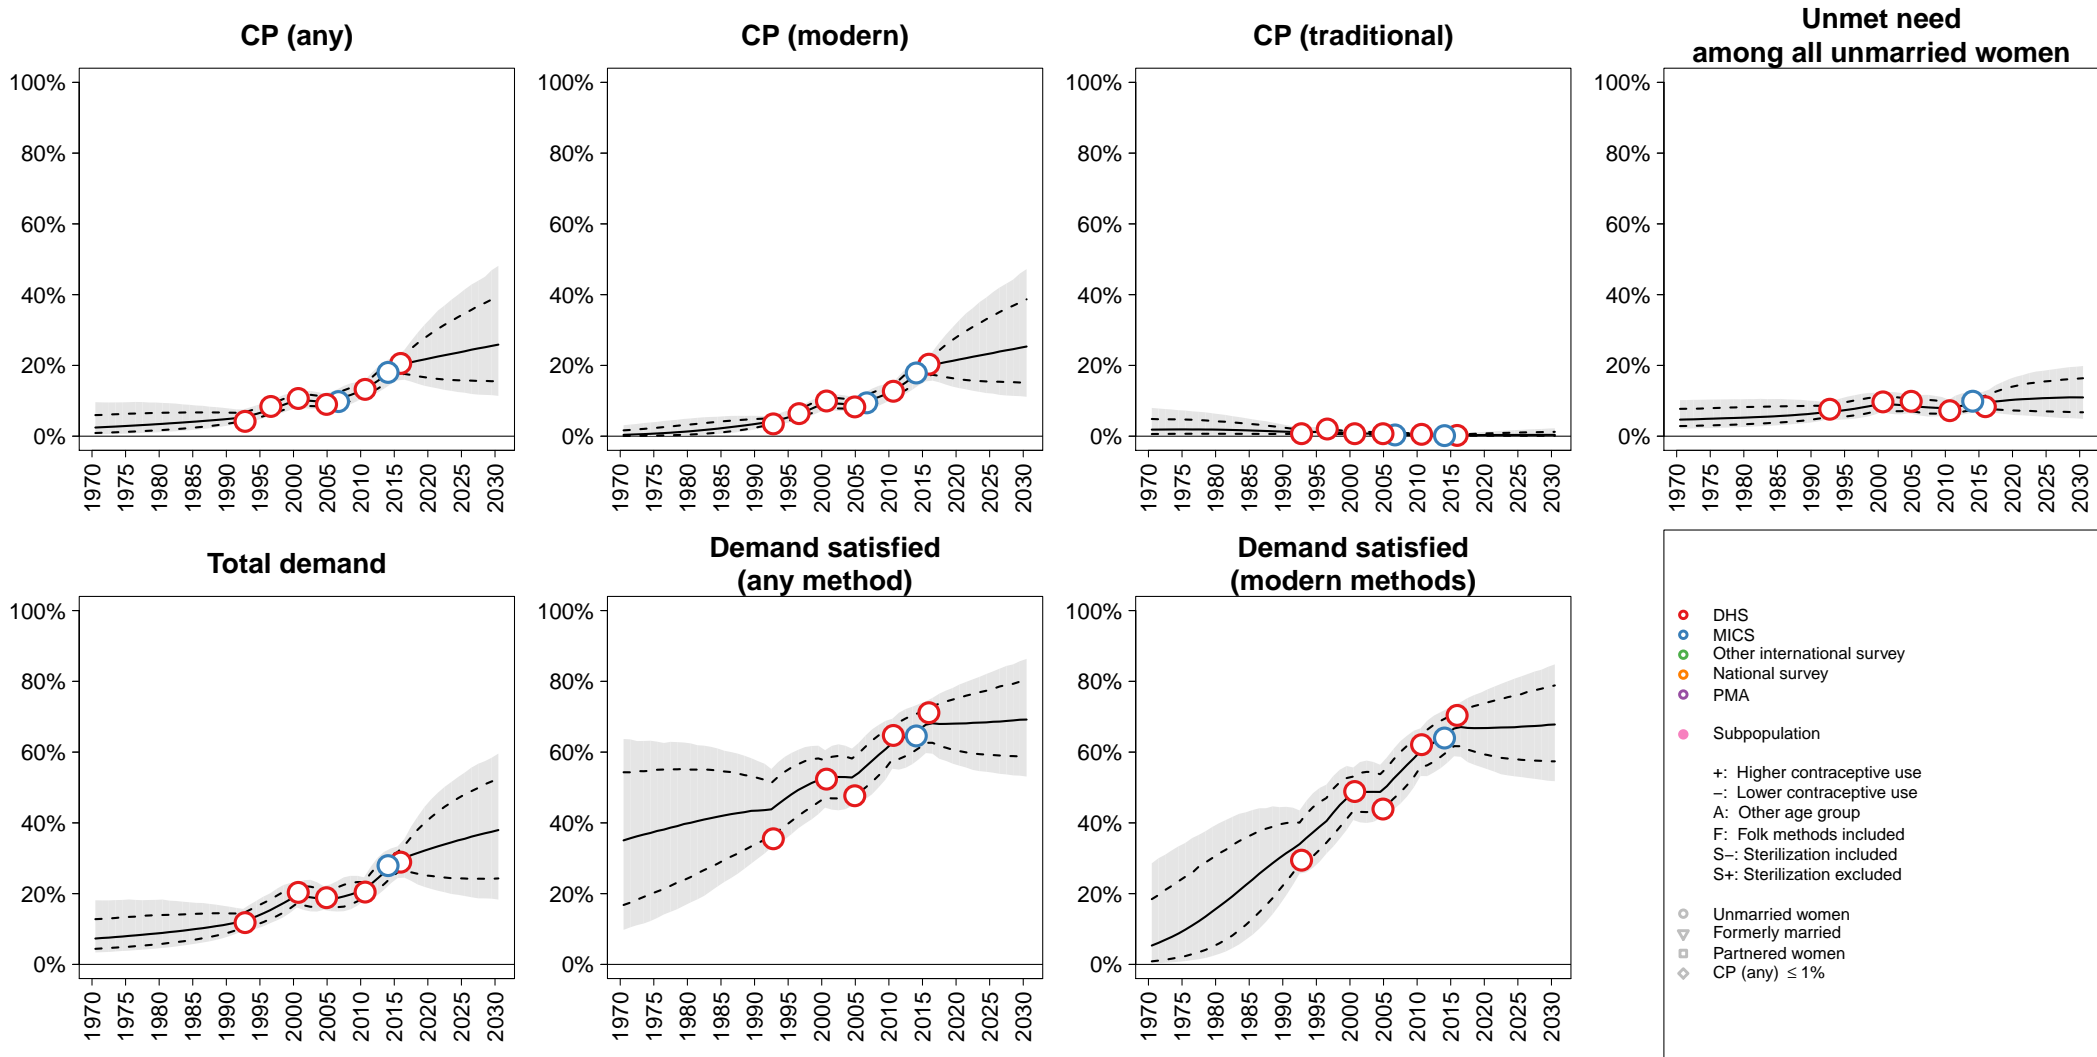



Malaysia (South-eastern Asia, SA Group 0) --- Unmarried / Not In-Union

CP (any)

CP (modern)

CP (traditional)

Unmet need among all unmarried women

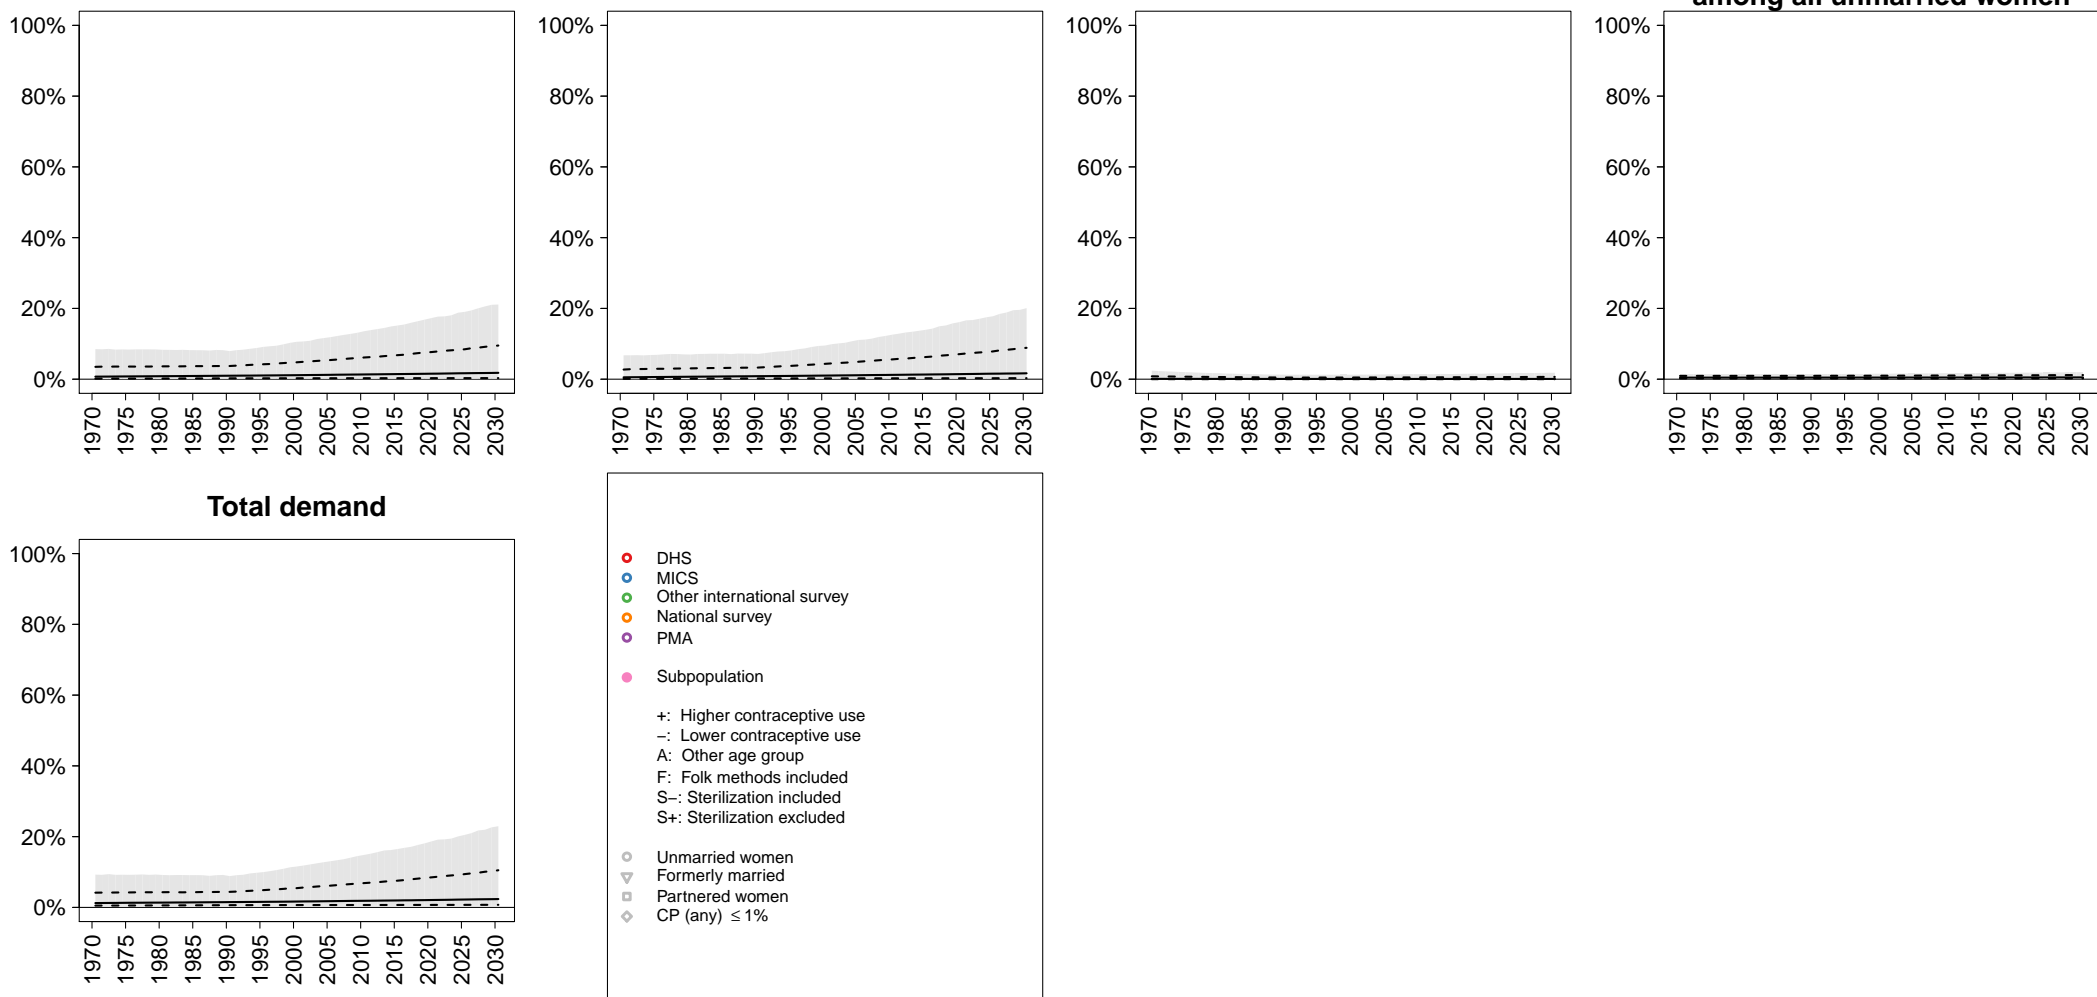

Maldives (Southern Asia, SA Group 0) --- Unmarried / Not In-Union

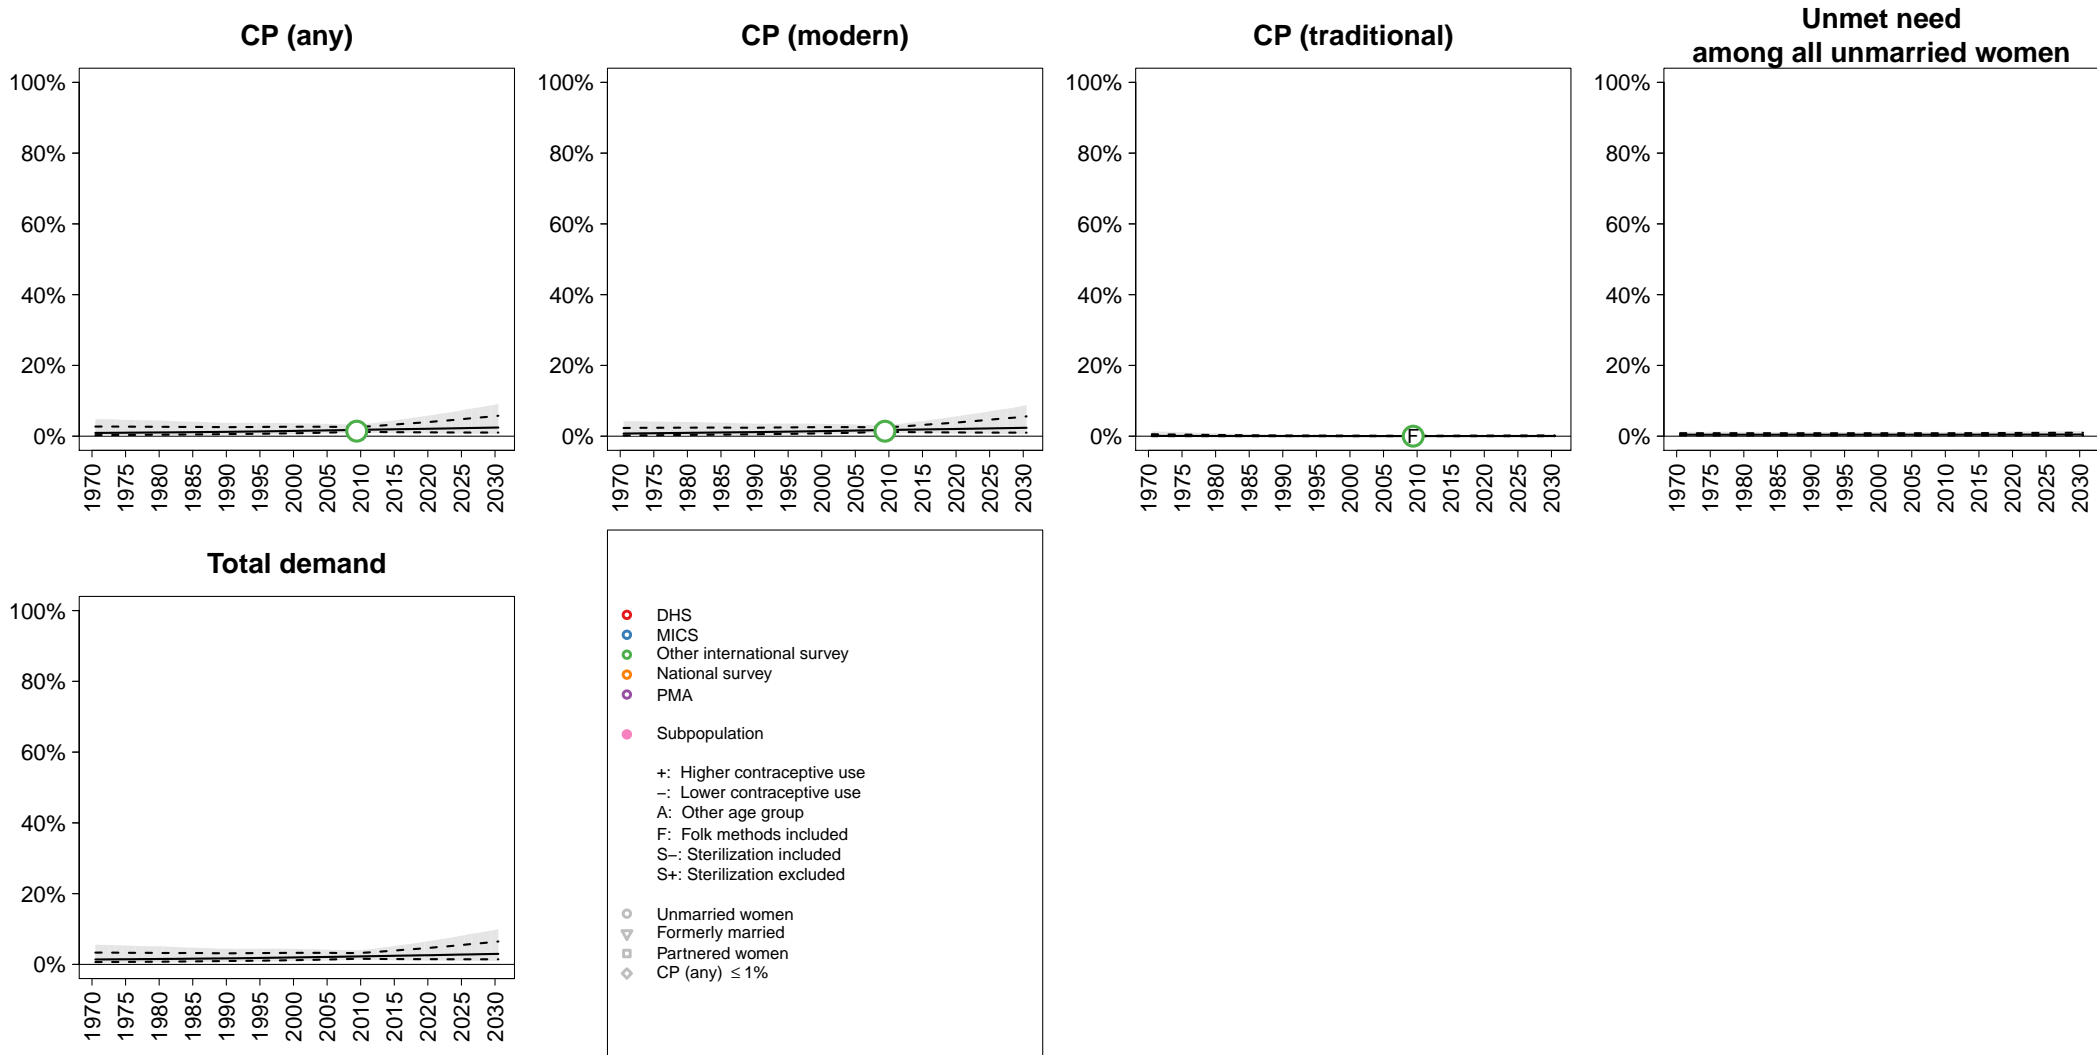

Mali (Western Africa, SA Group 1) --- Unmarried / Not In-Union

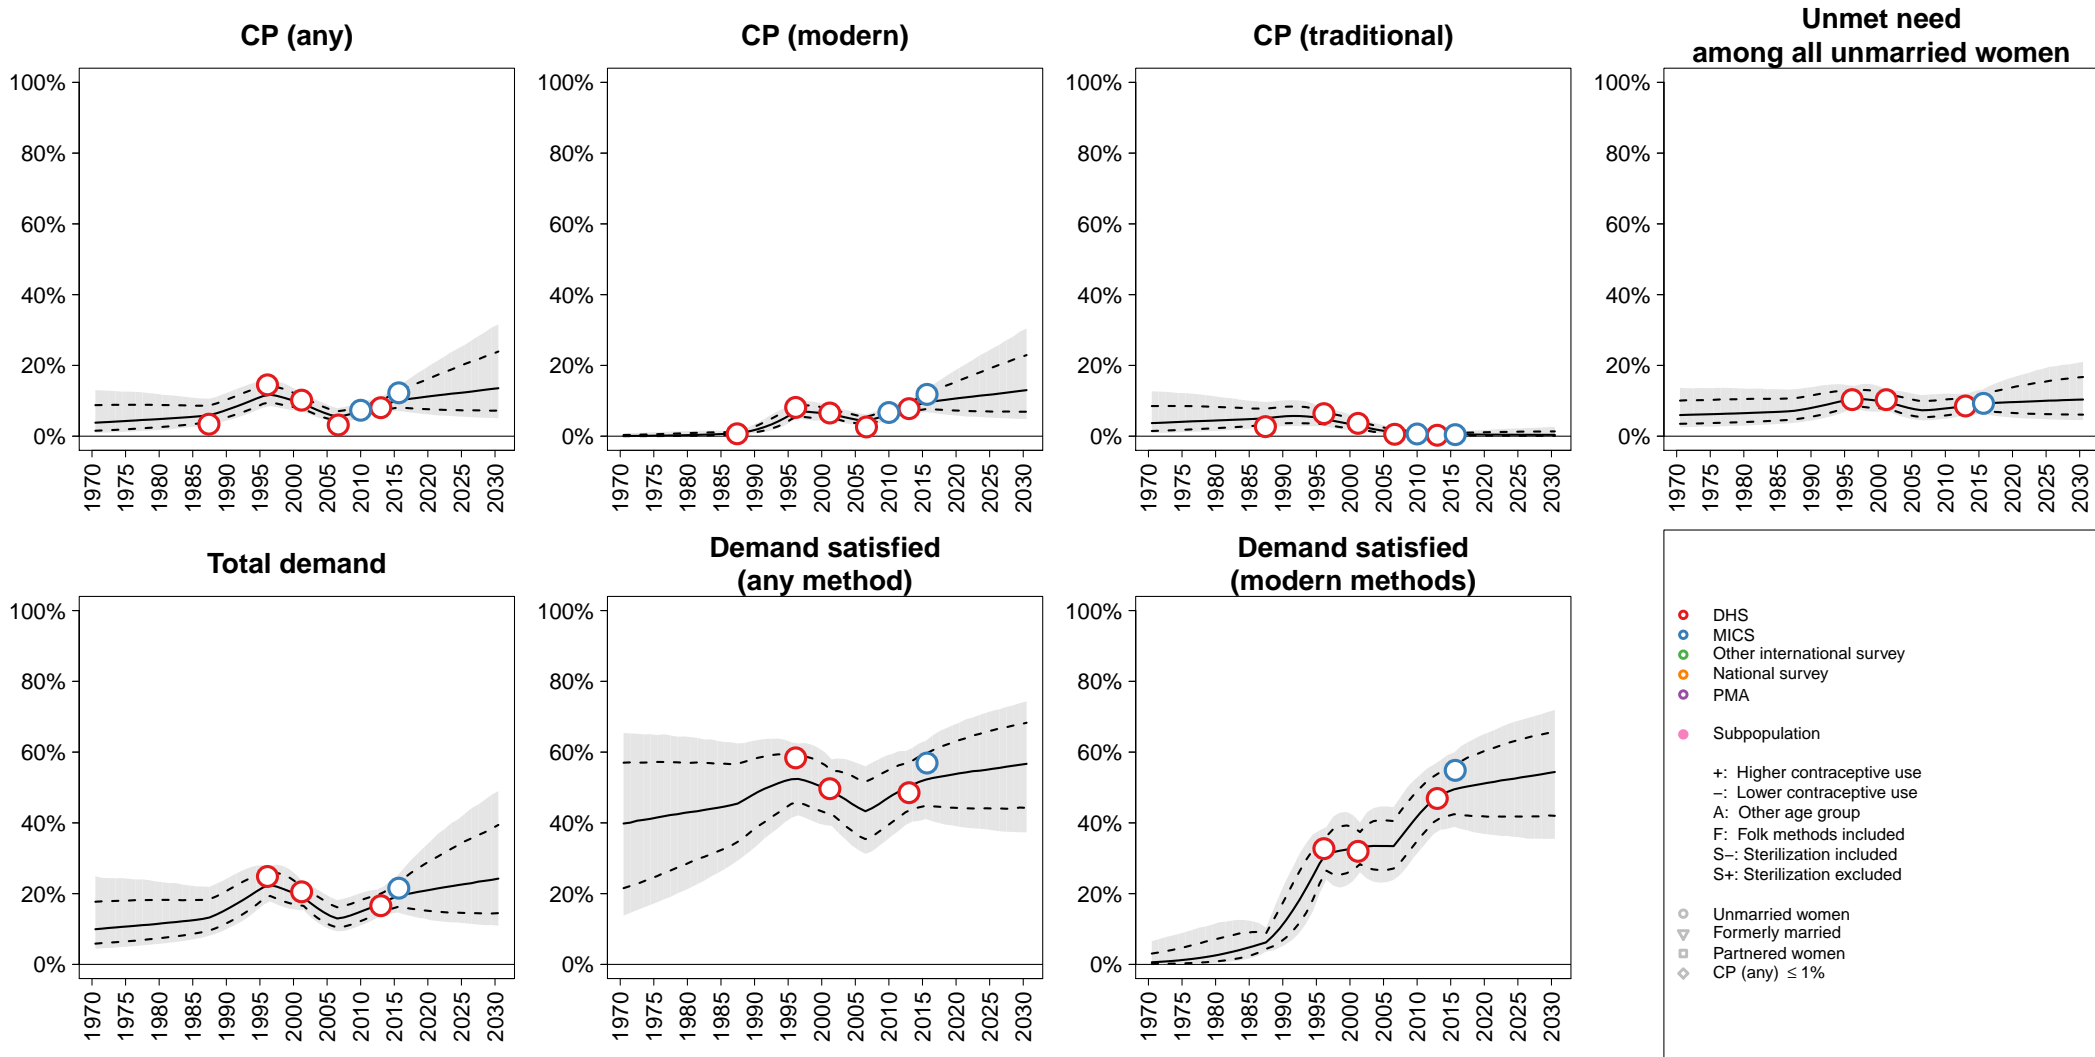

Malta (Southern Europe, SA Group 1) --- Unmarried / Not In-Union

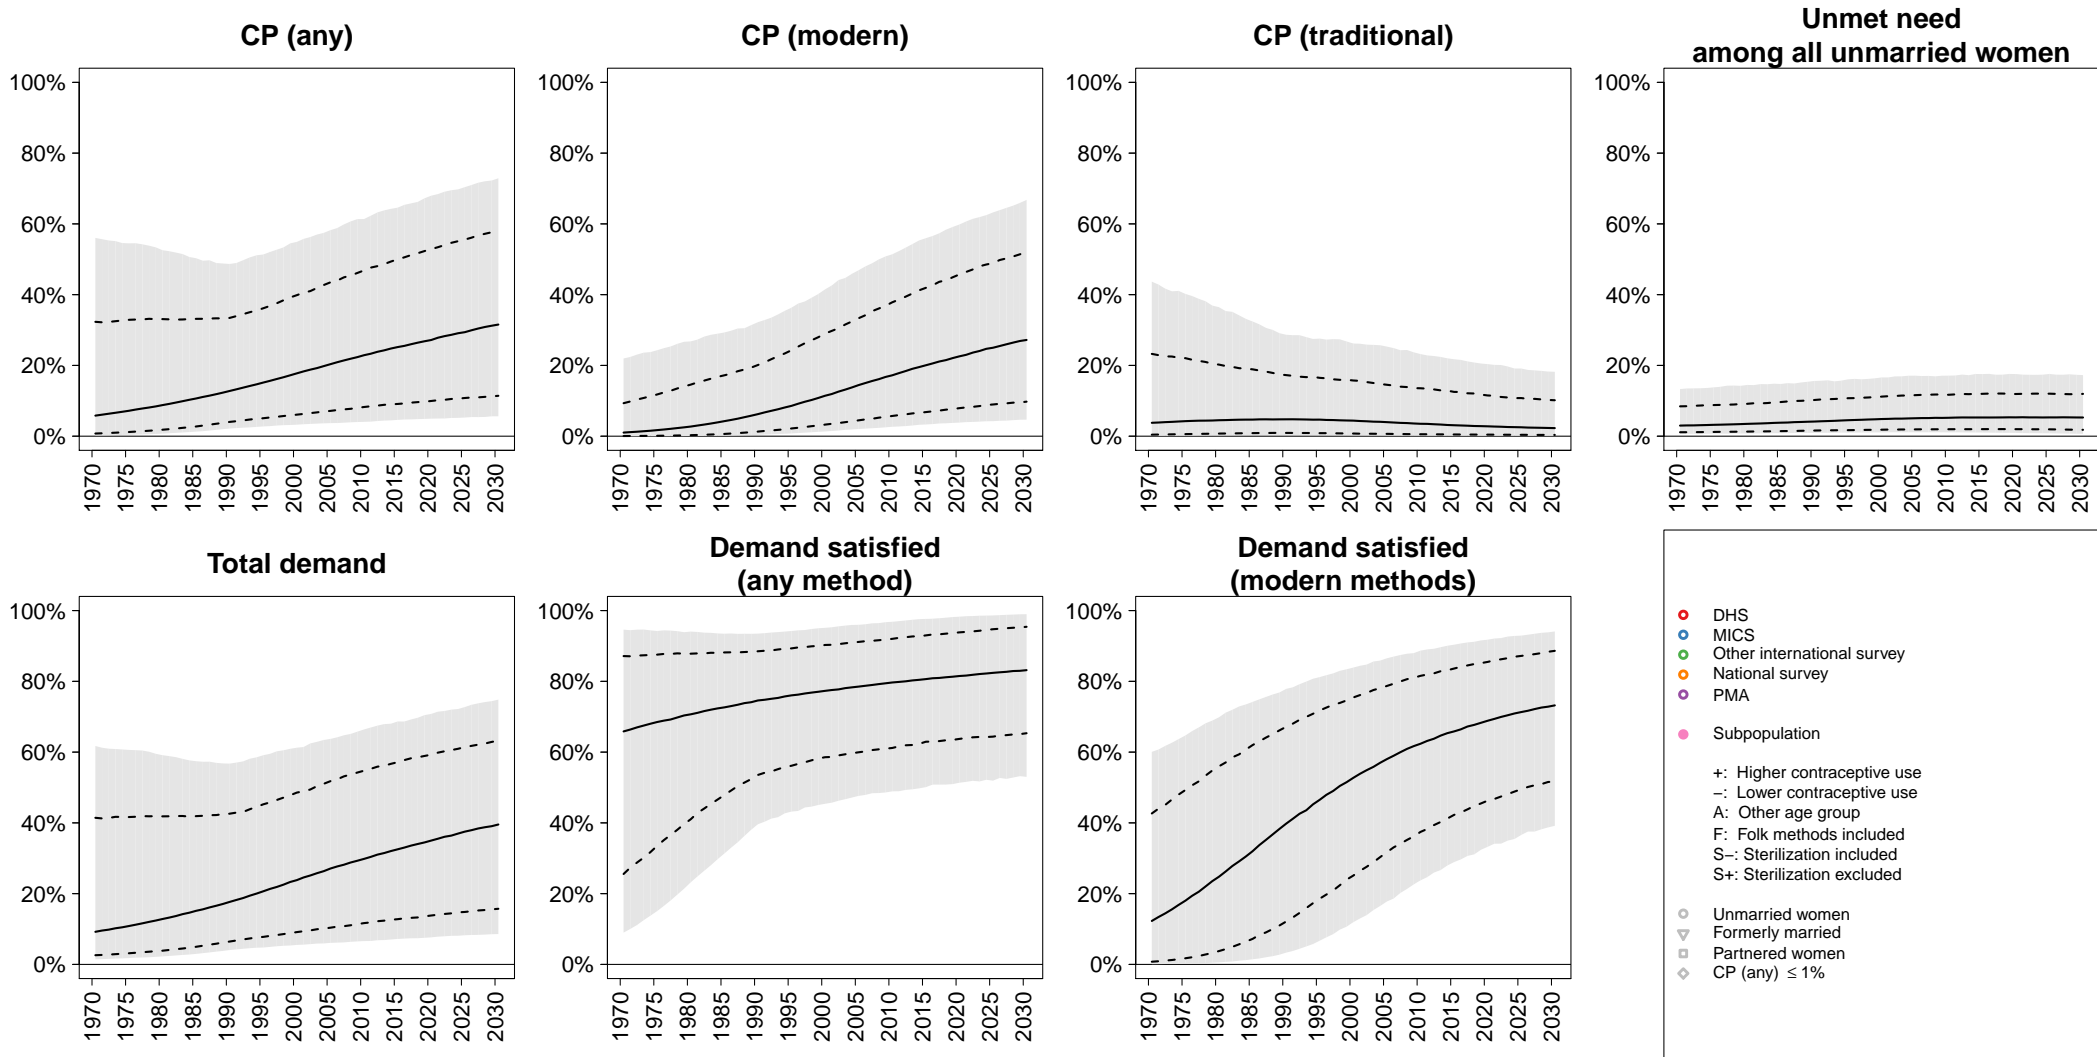

Martinique (Caribbean, SA Group 1) --- Unmarried / Not In-Union

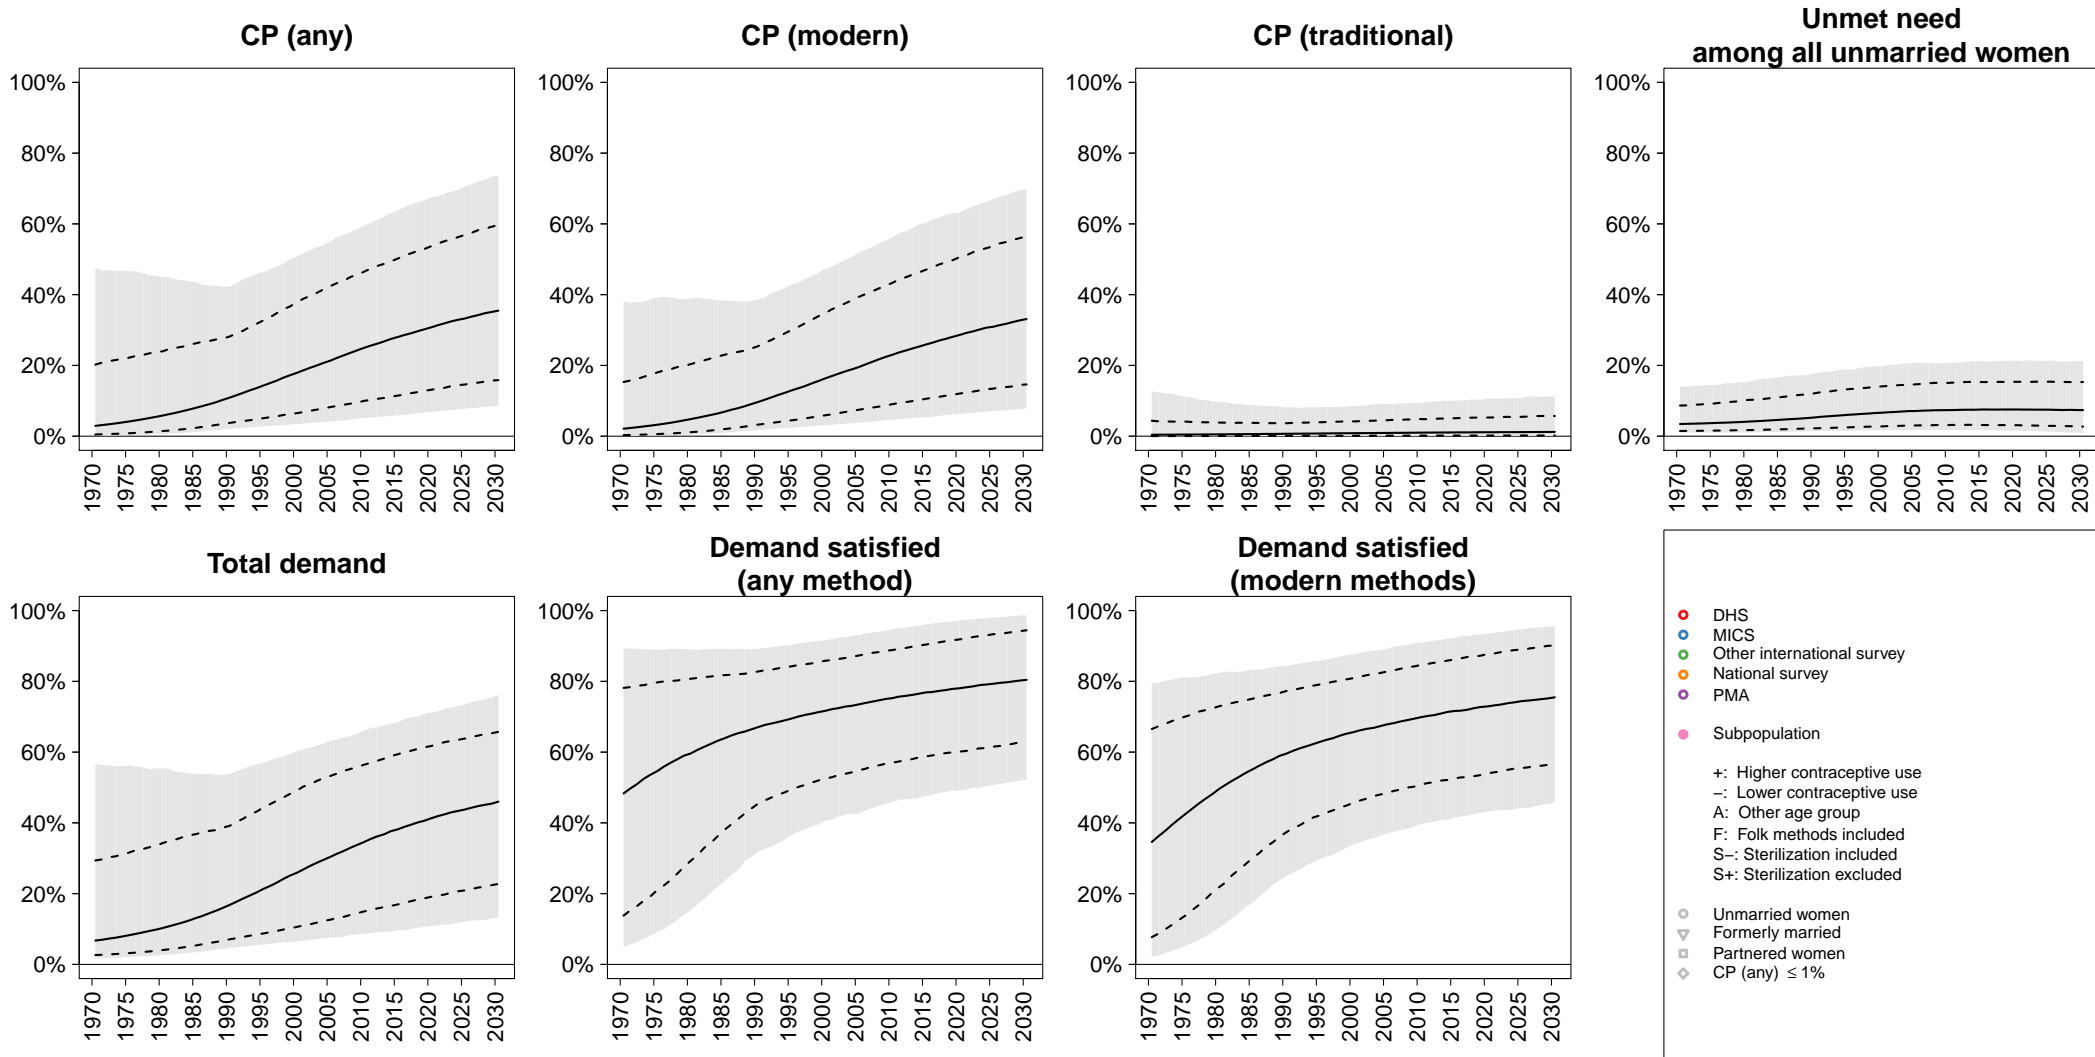

Mauritania (Western Africa, SA Group 0) --- Unmarried / Not In-Union

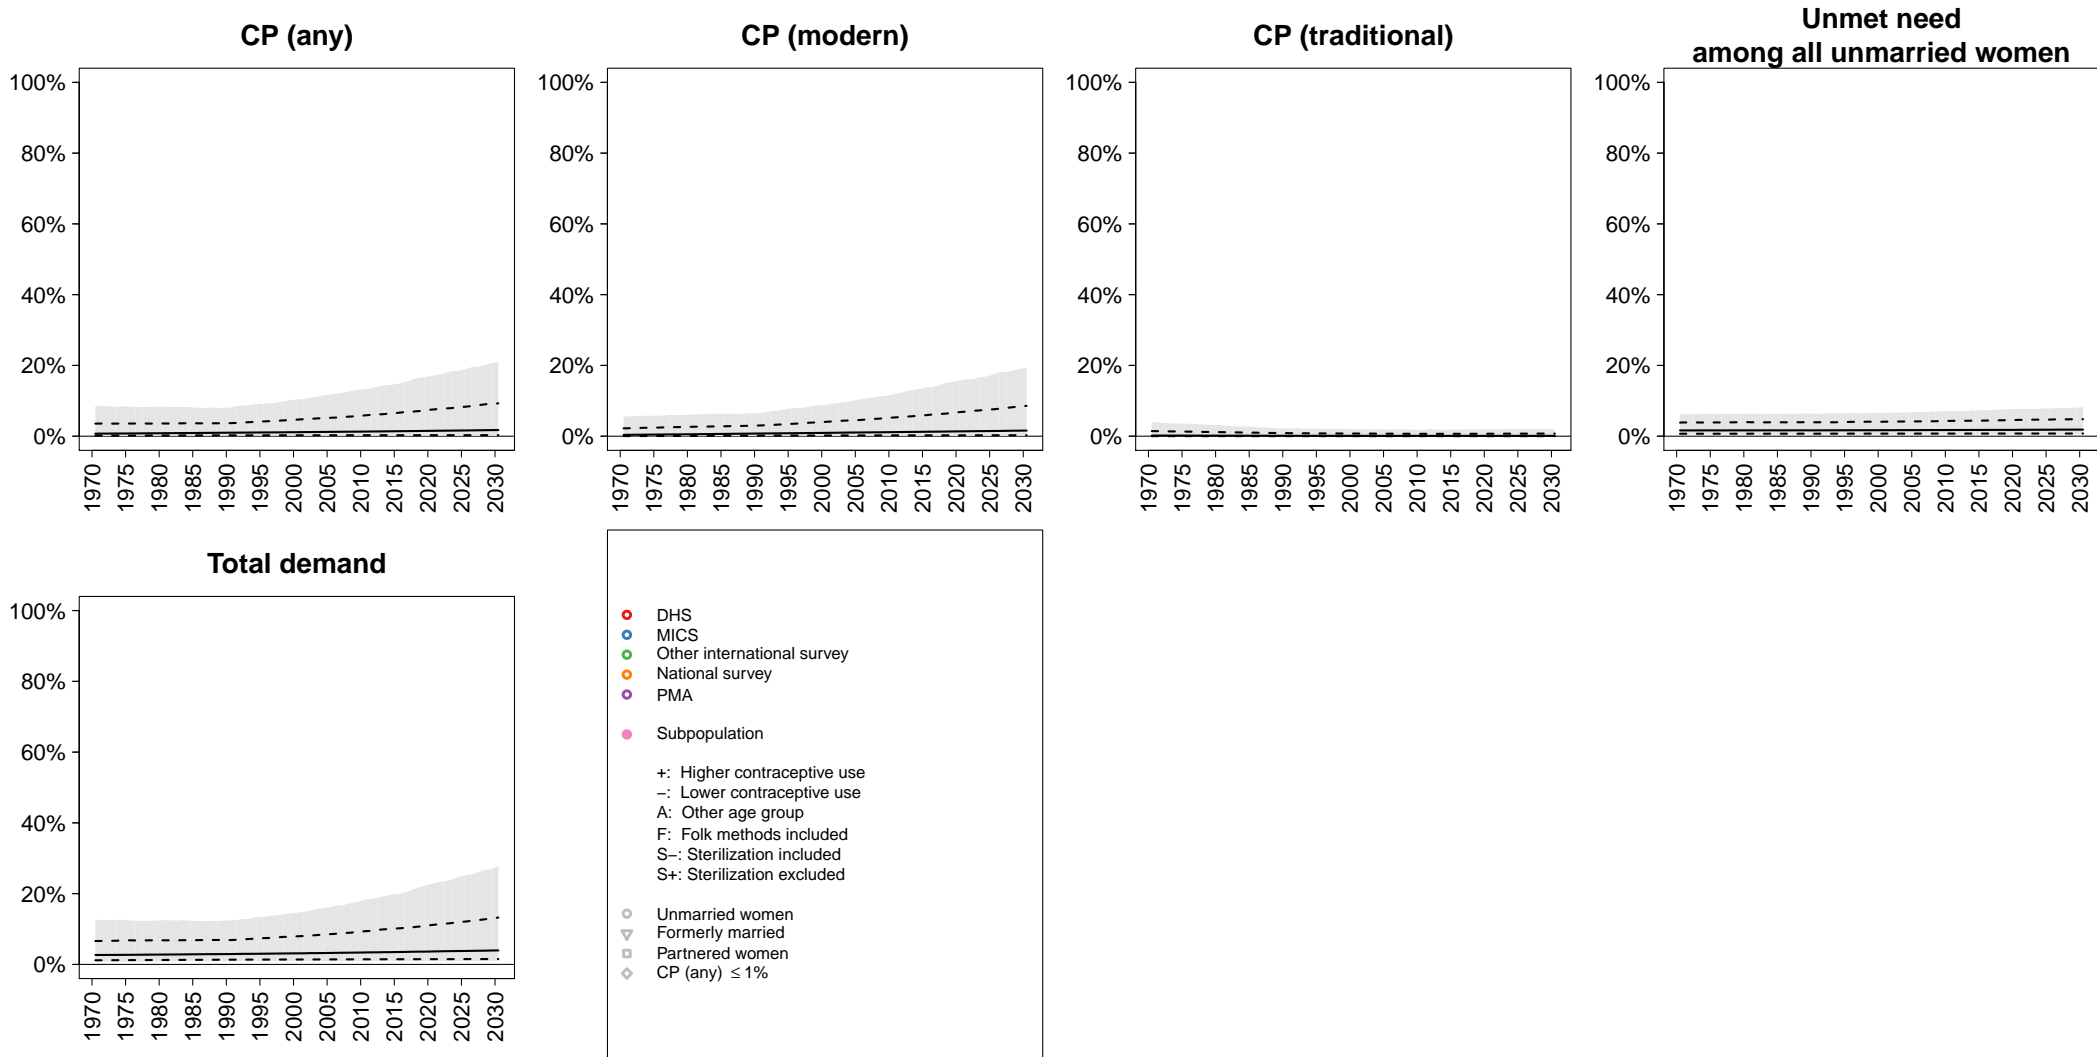

Mauritius (Eastern Africa, SA Group 1) --- Unmarried / Not In-Union

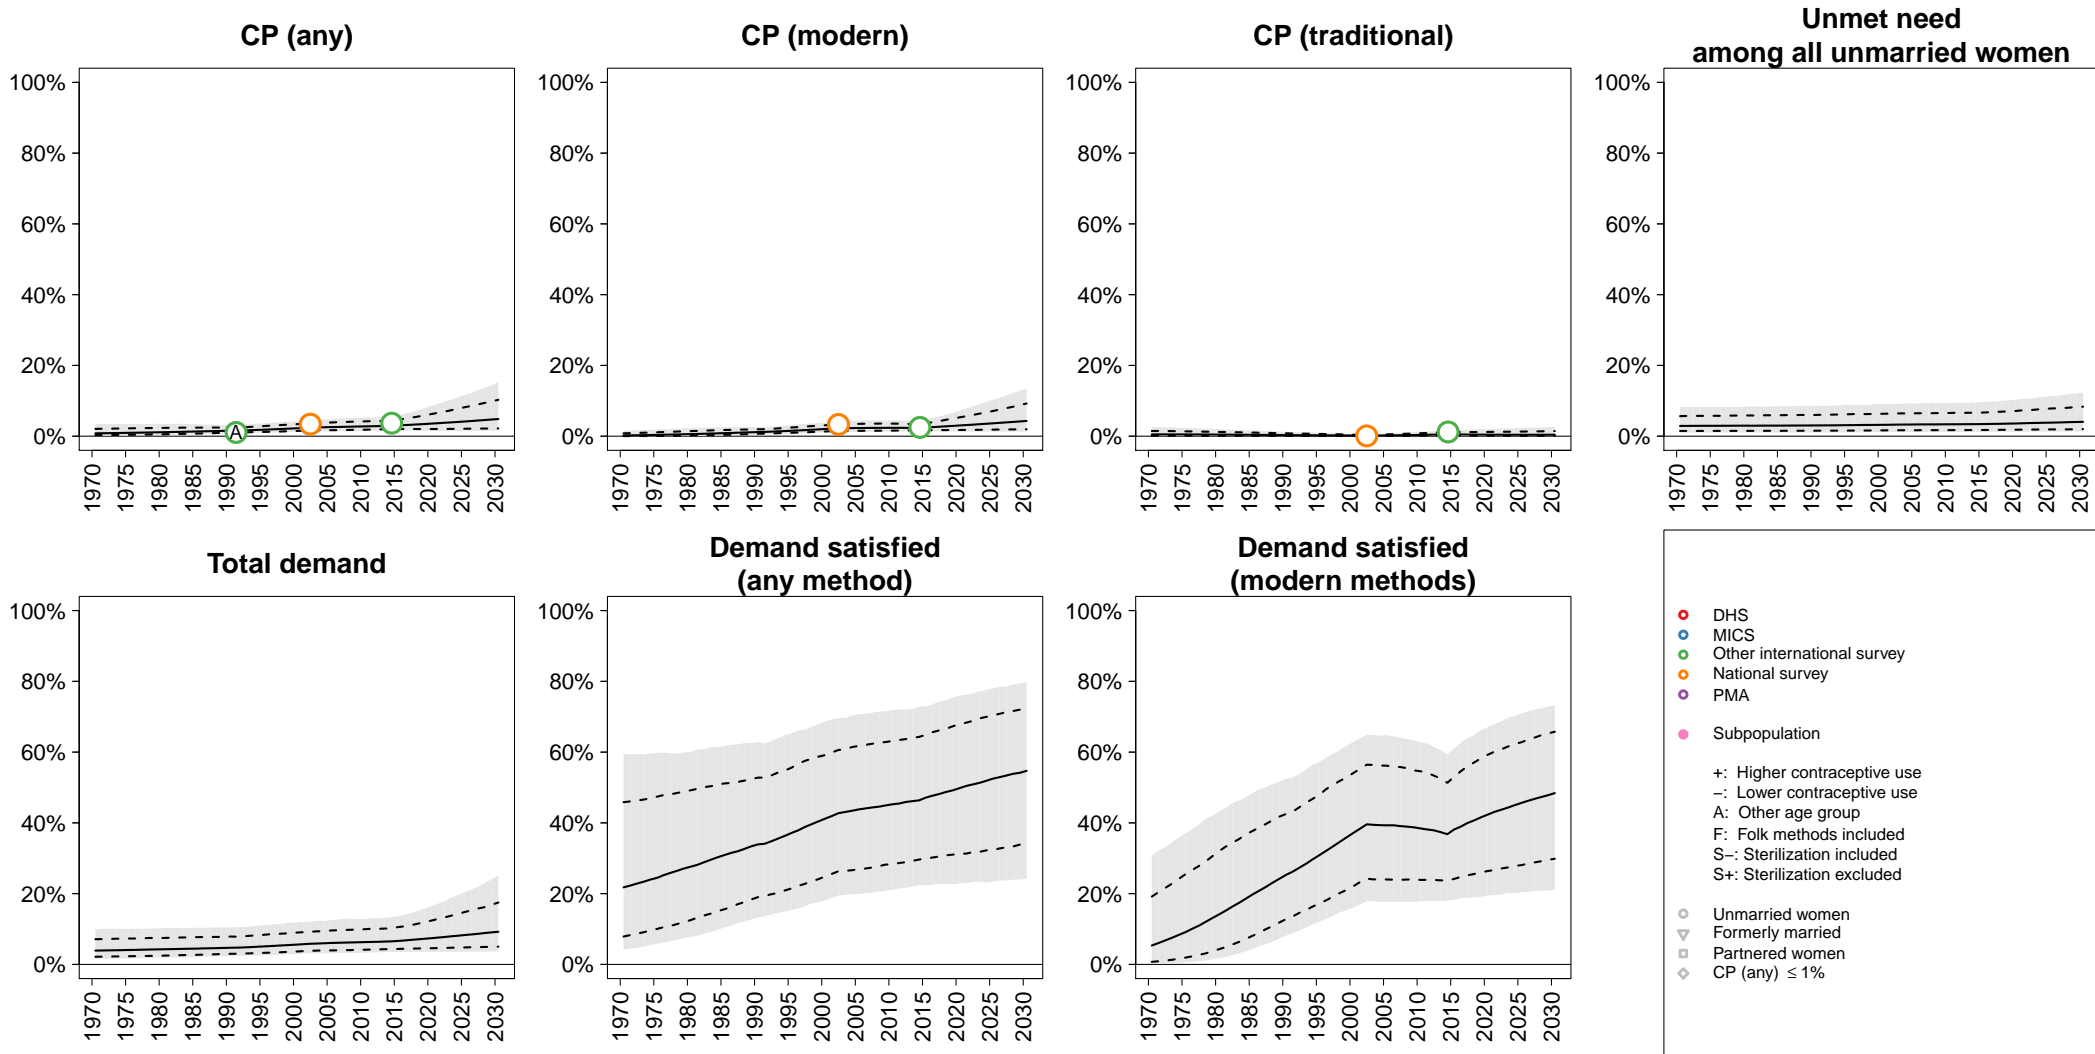

Mexico (Central America, SA Group 1) --- Unmarried / Not In-Union

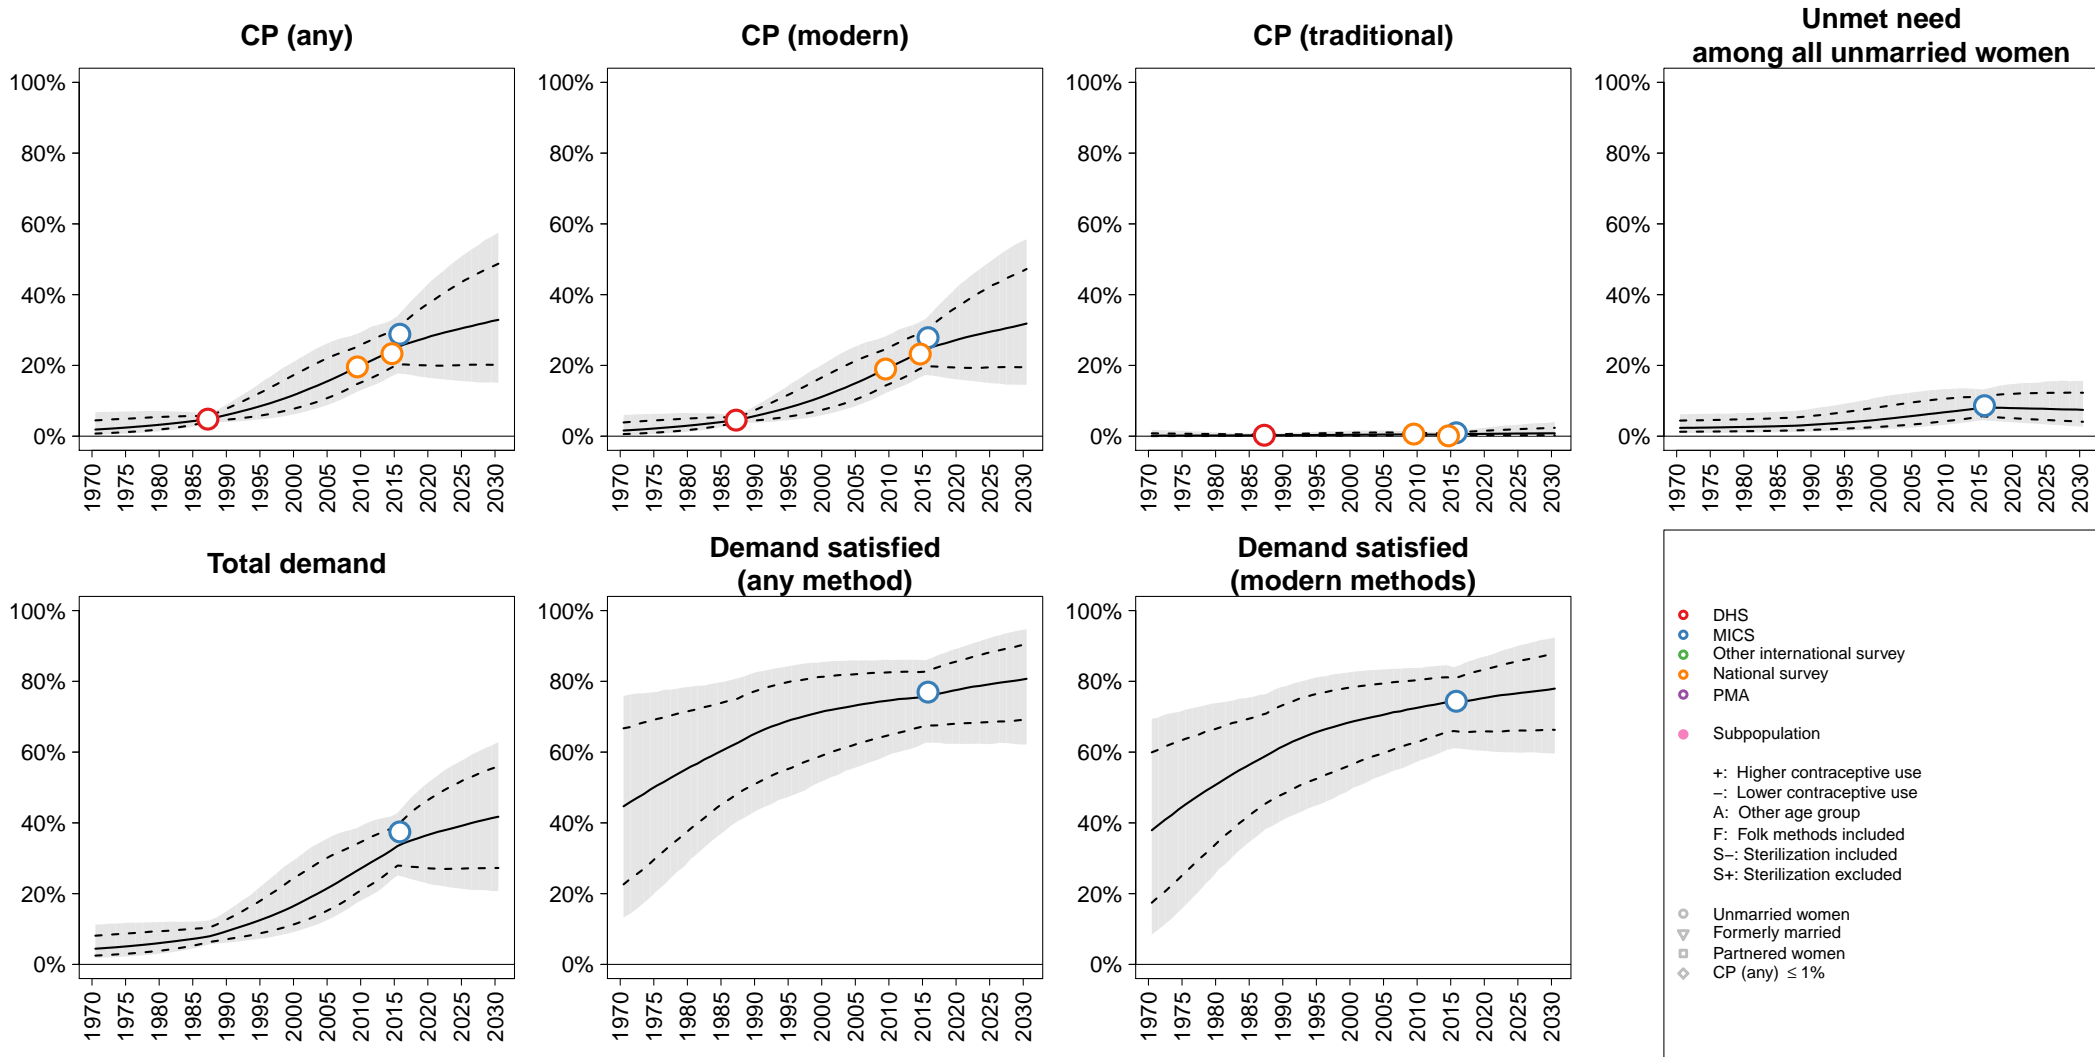



Mongolia (Eastern Asia, SA Group 1) --- Unmarried / Not In-Union

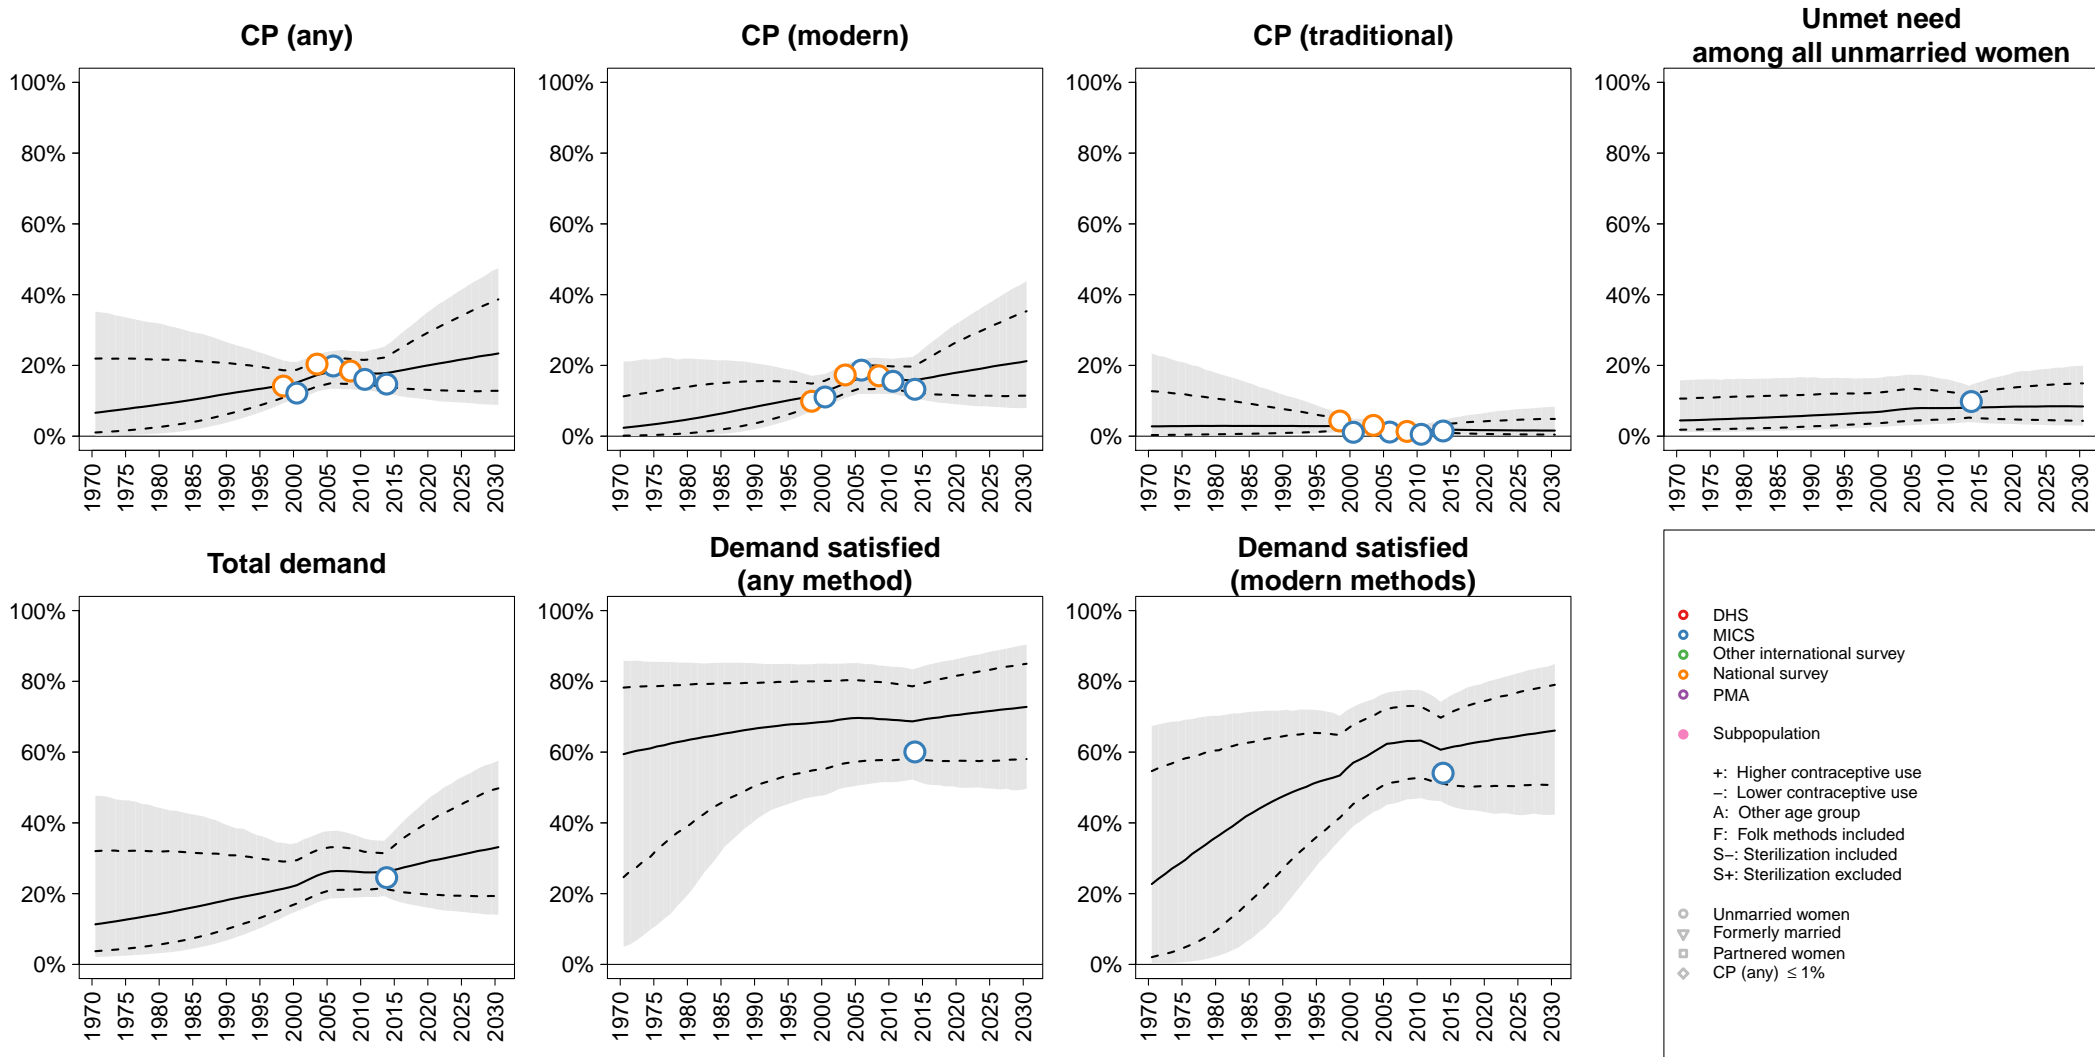

Montenegro (Southern Europe, SA Group 1) --- Unmarried / Not In-Union

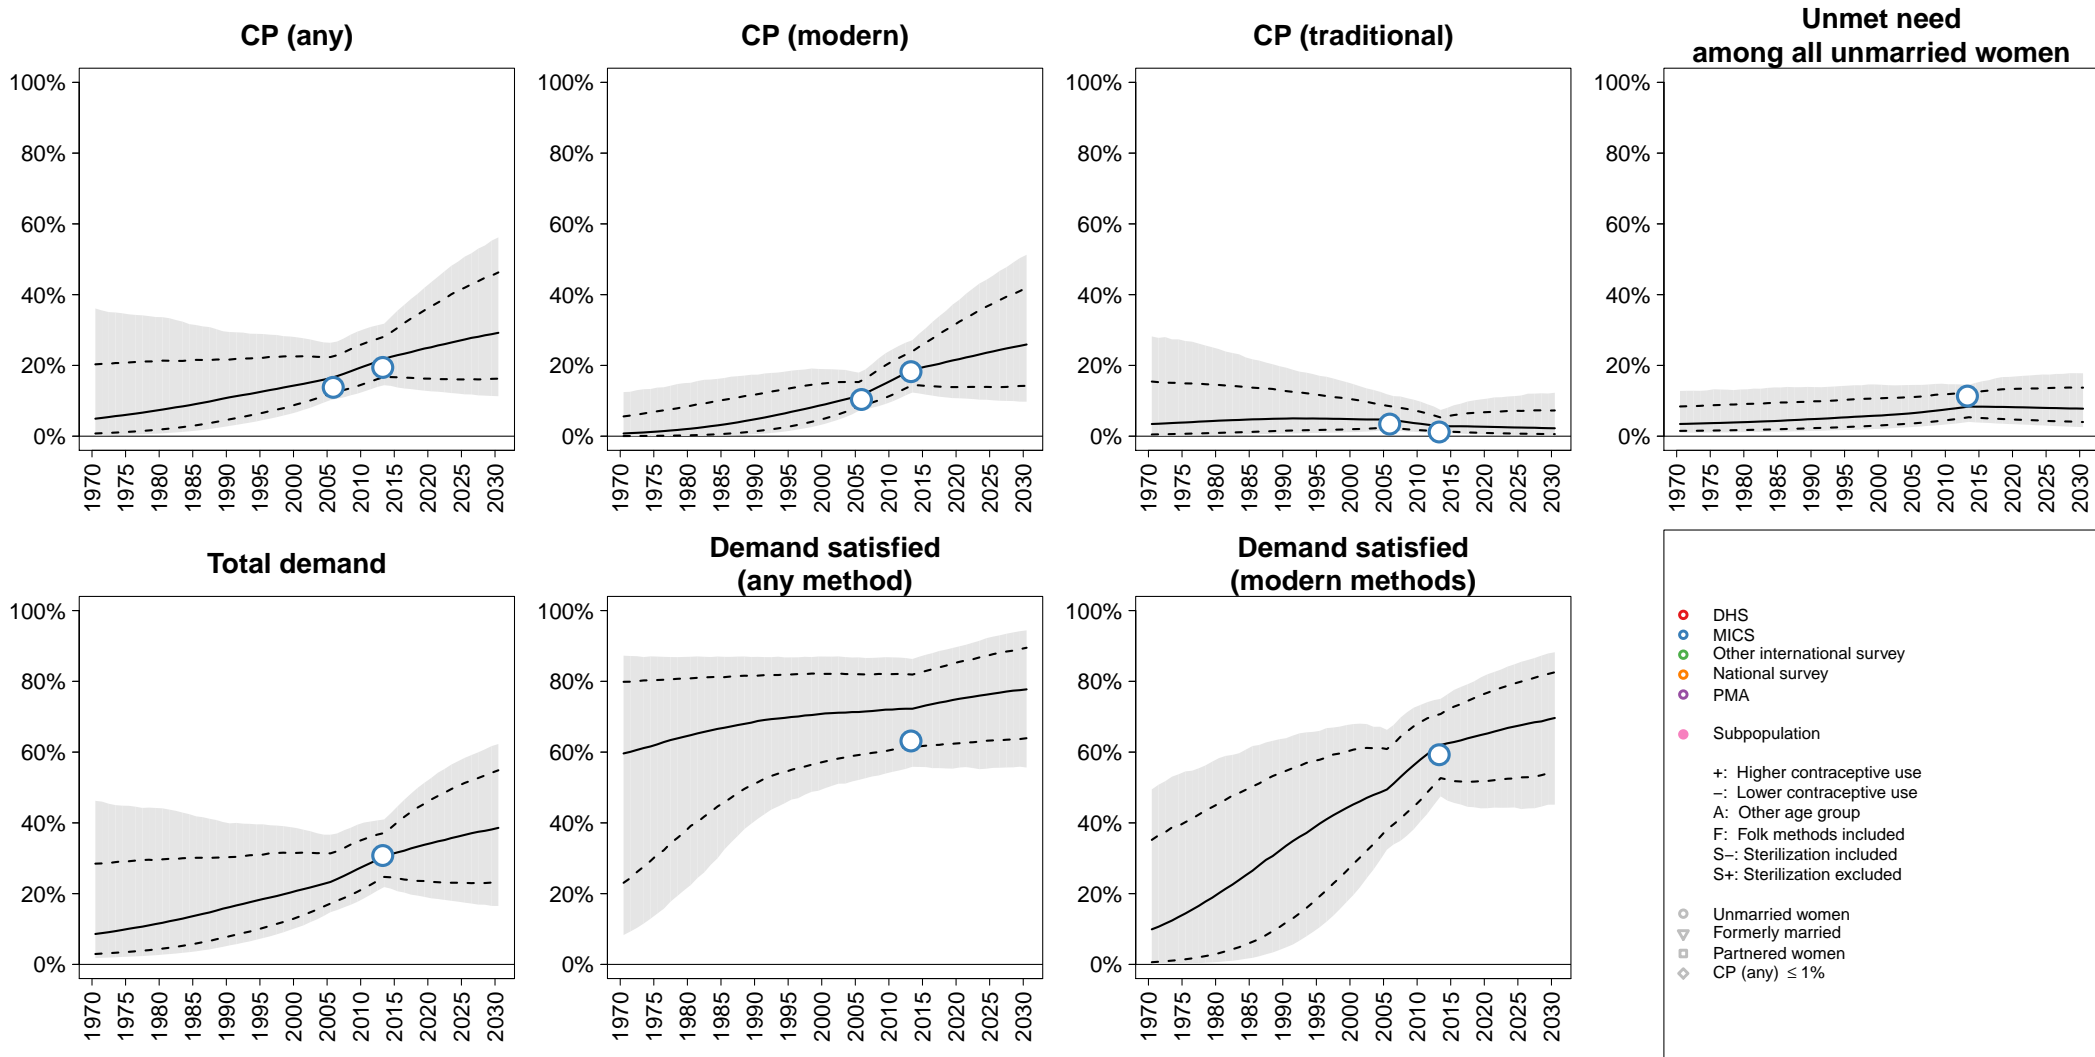

Morocco (Northern Africa, SA Group 0) --- Unmarried / Not In-Union

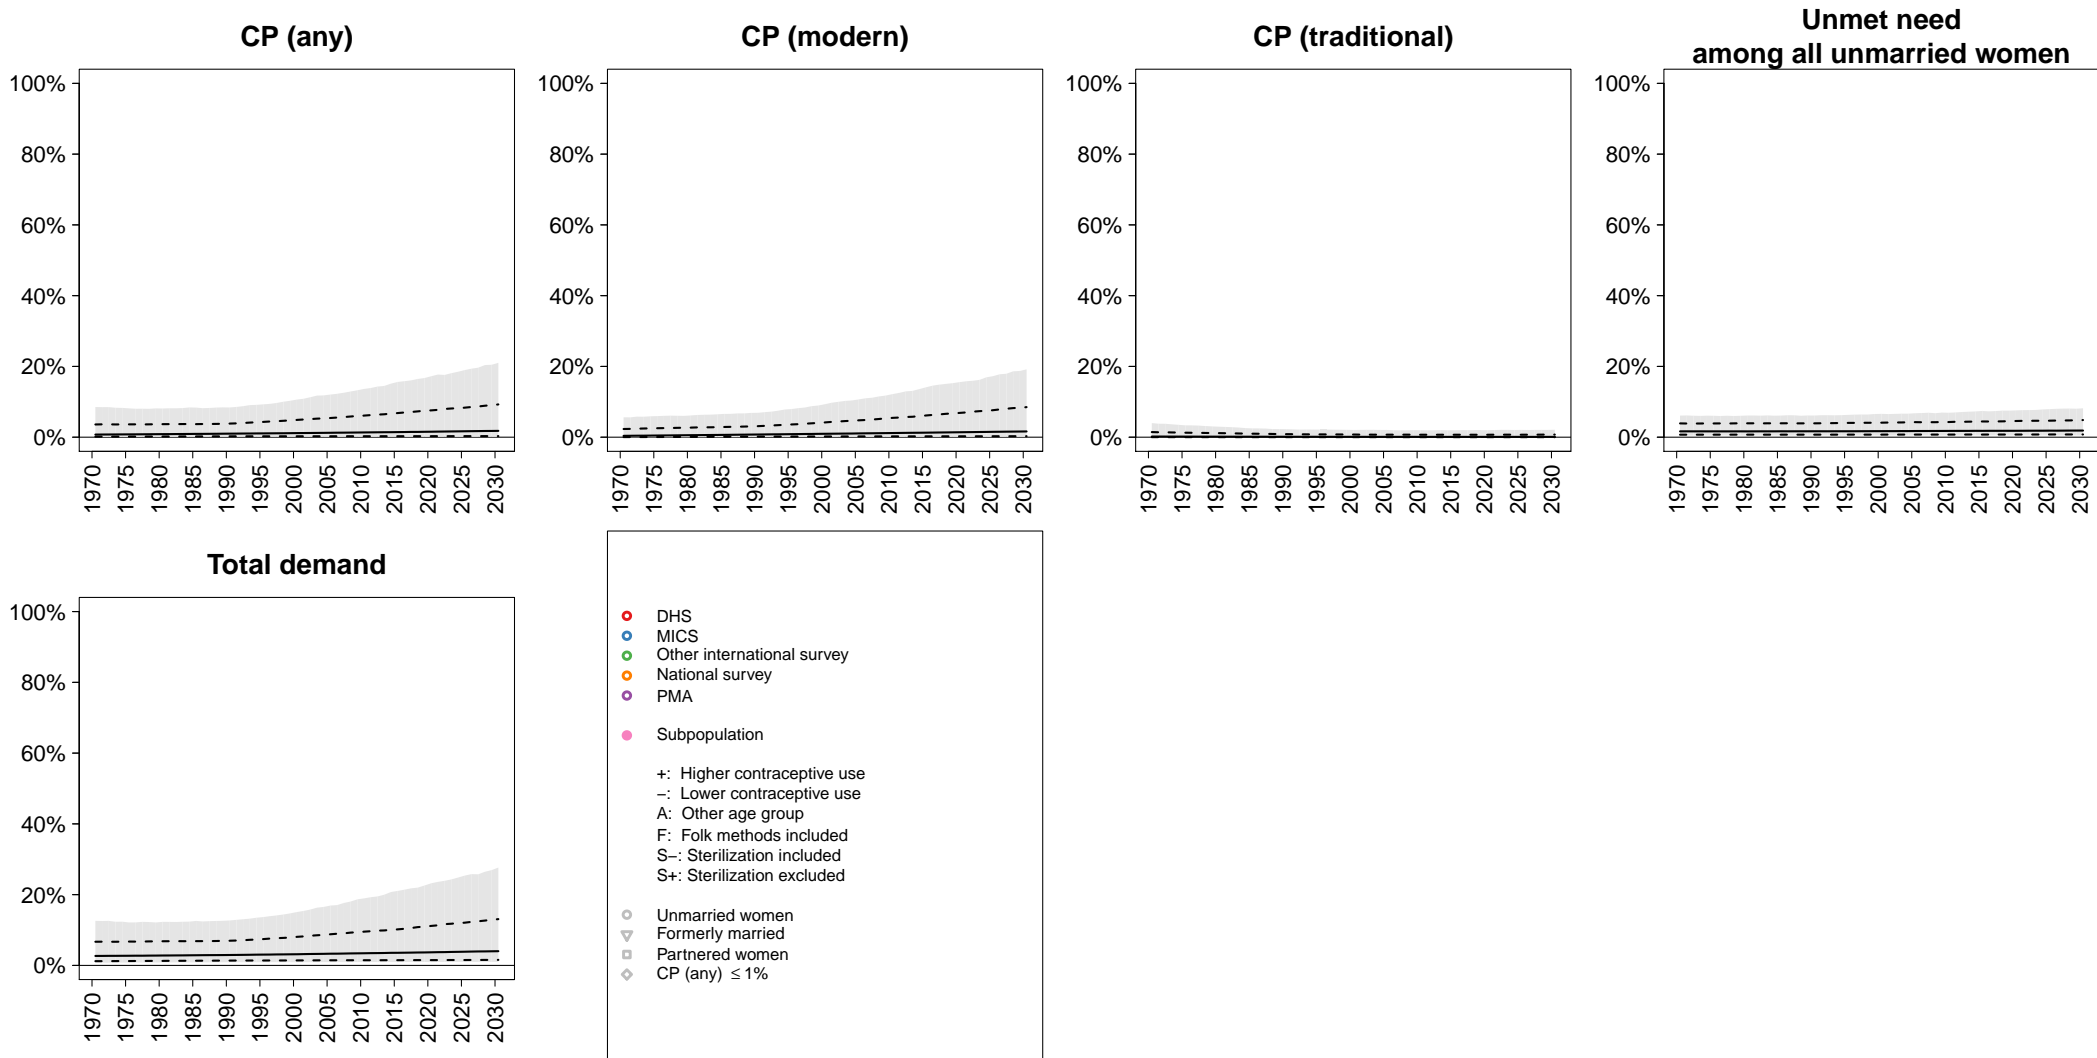

Mozambique (Eastern Africa, SA Group 1) --- Unmarried / Not In-Union

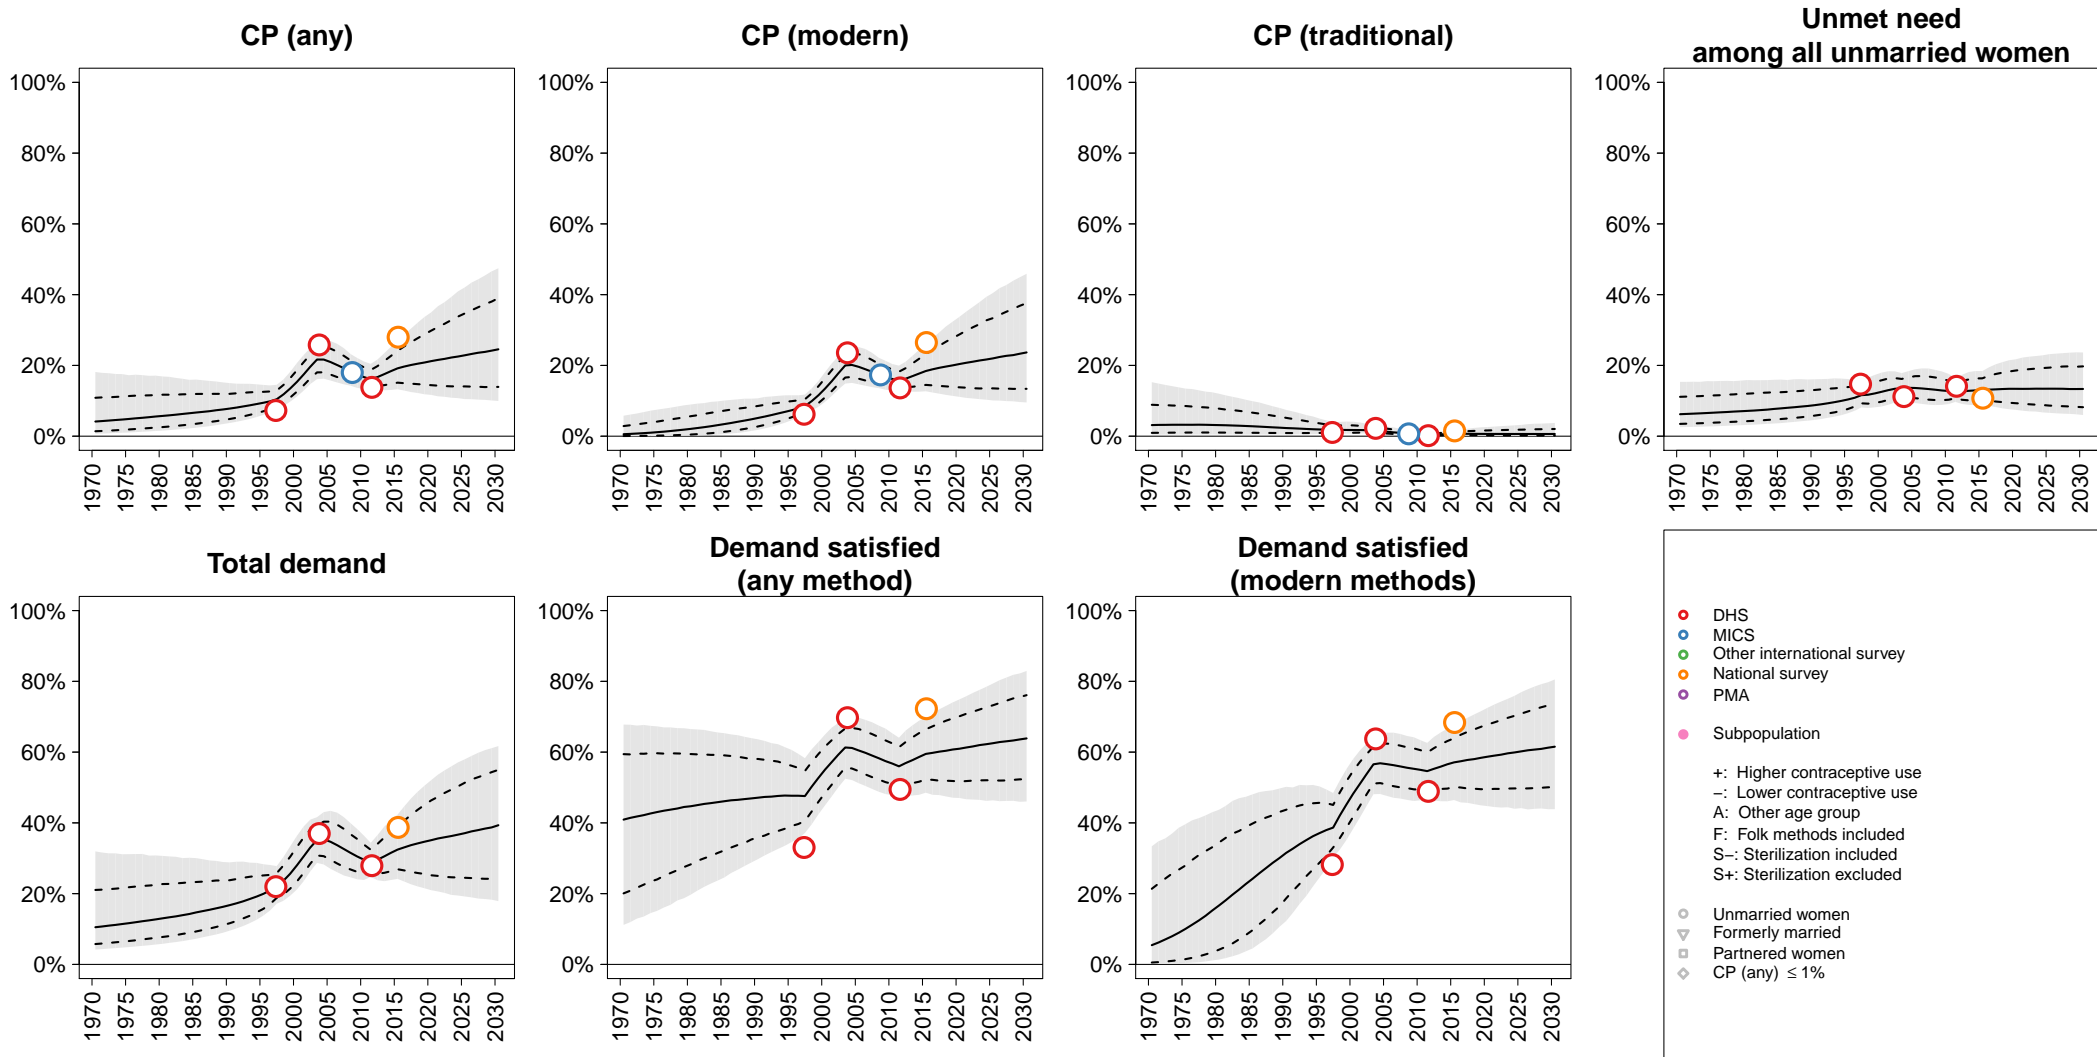

Myanmar (South-eastern Asia, SA Group 0) --- Unmarried / Not In-Union

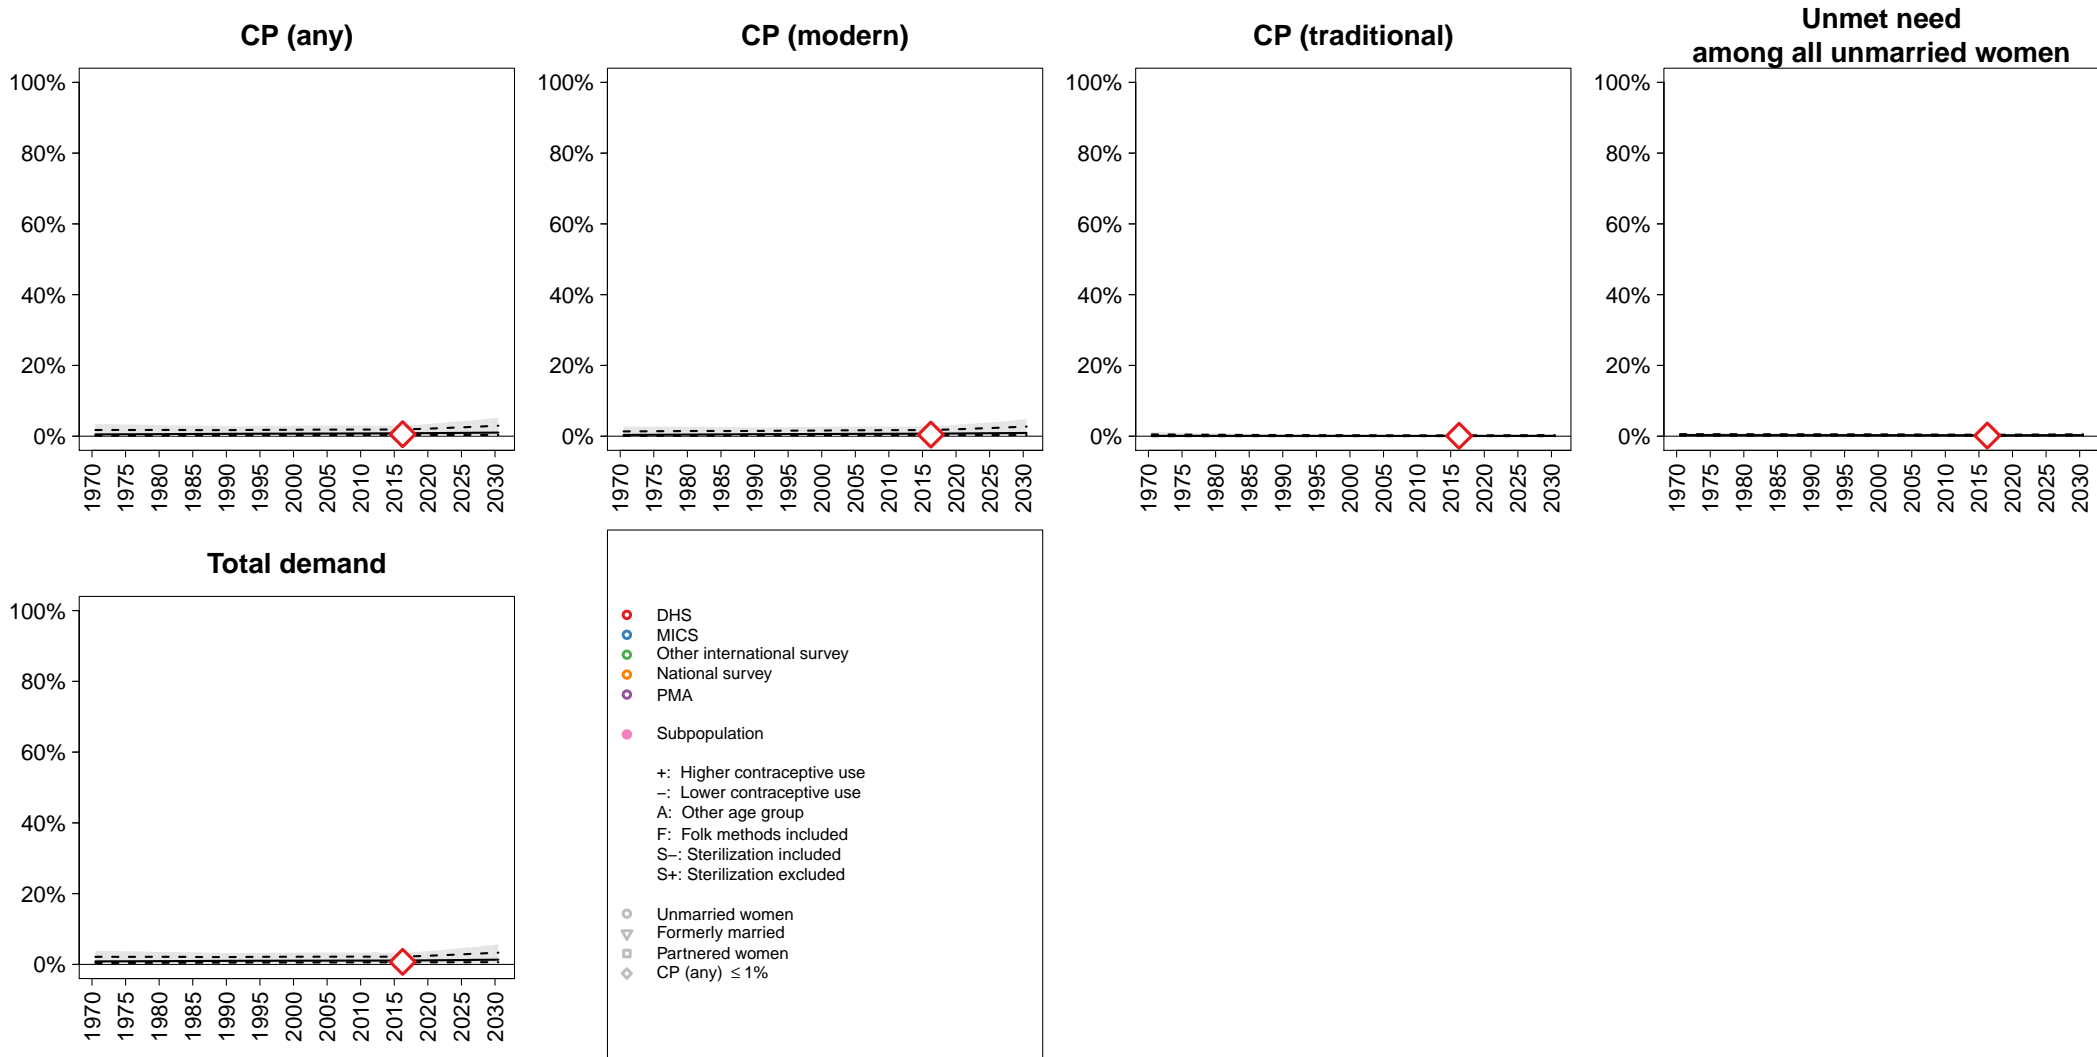

Namibia (Southern Africa, SA Group 1) --- Unmarried / Not In-Union

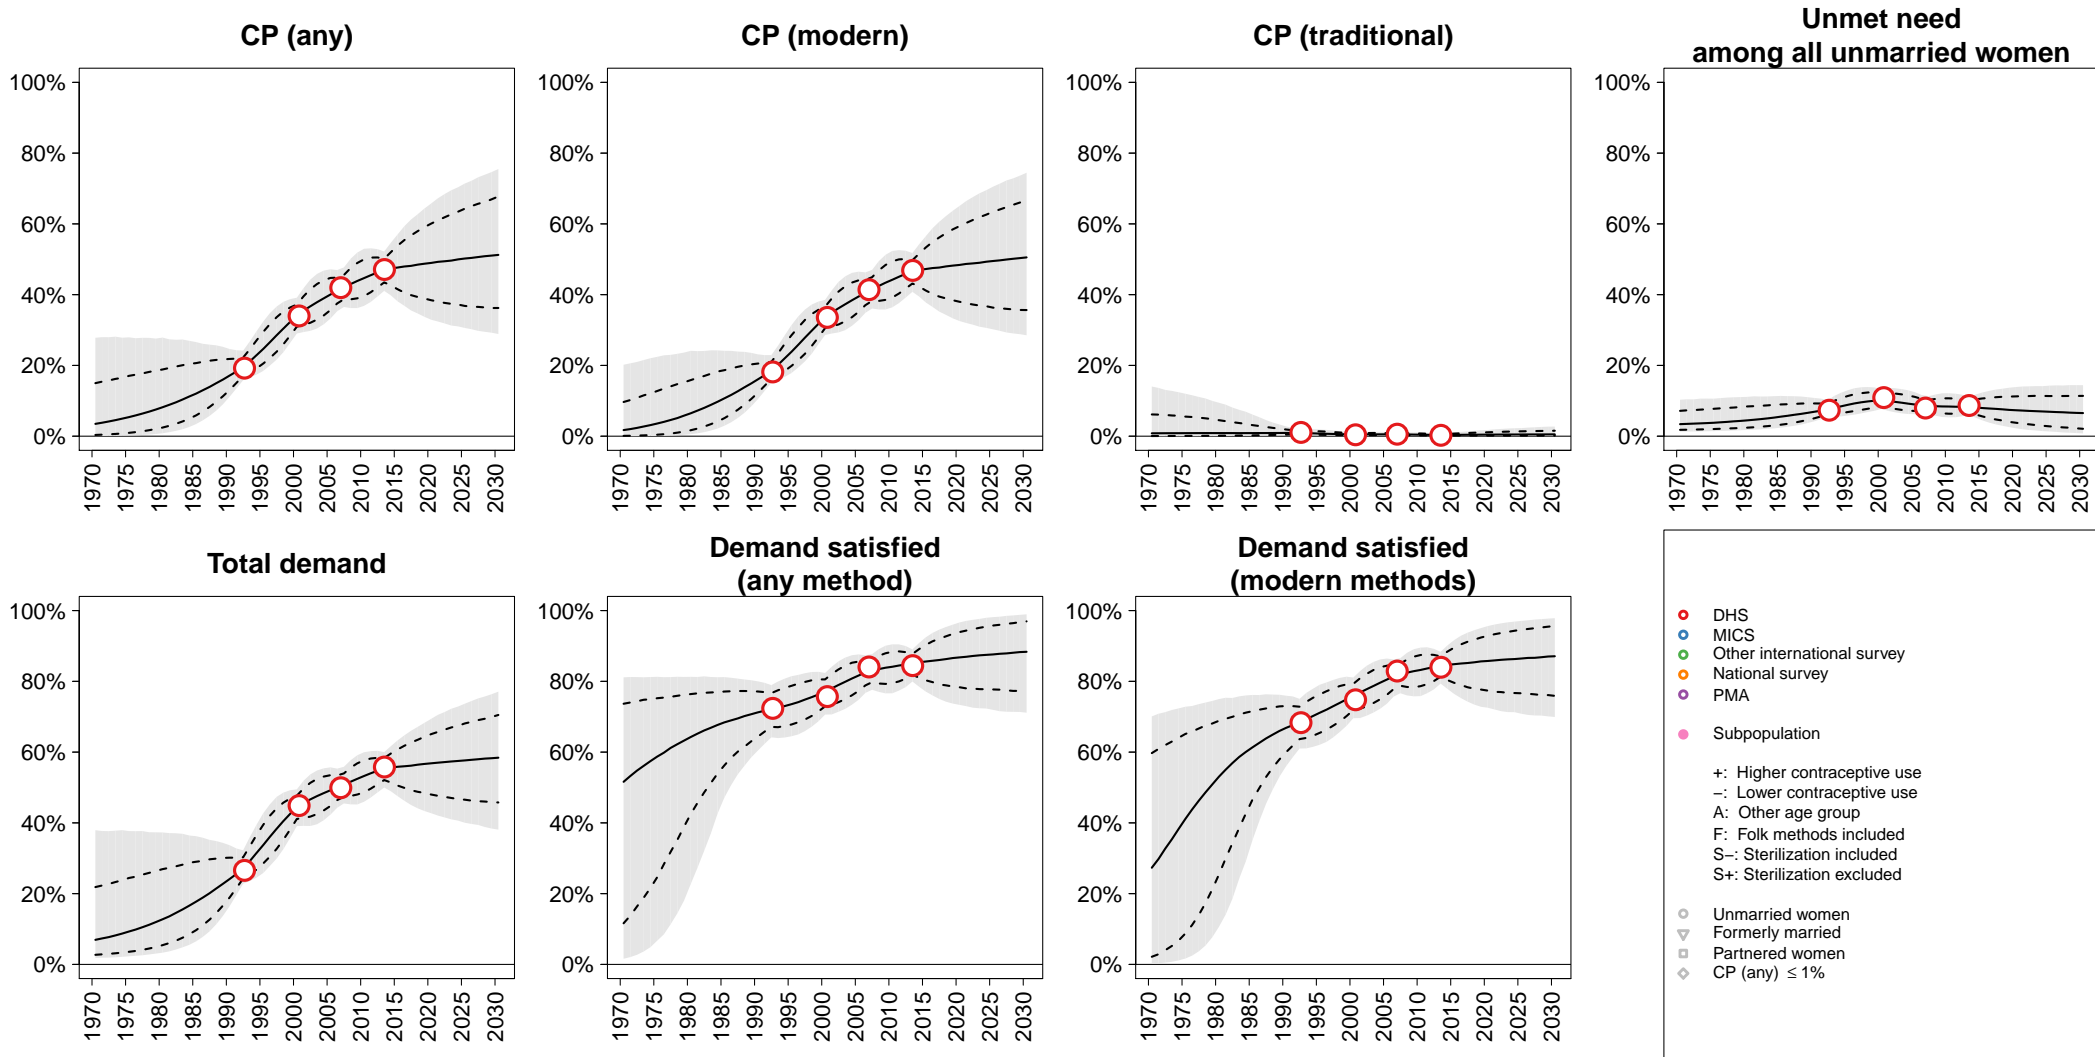

Nepal (Southern Asia, SA Group 0) --- Unmarried / Not In-Union

CP (any)

CP (modern)

CP (traditional)

Unmet need among all unmarried women

Total demand

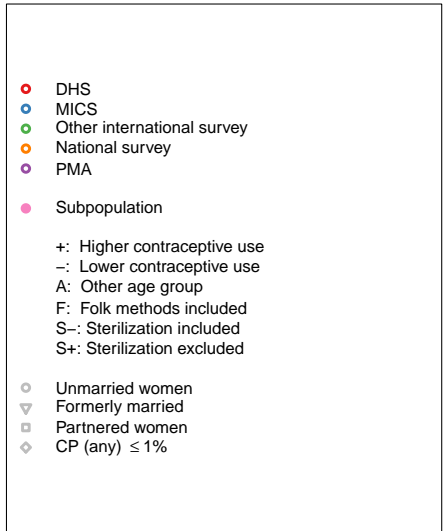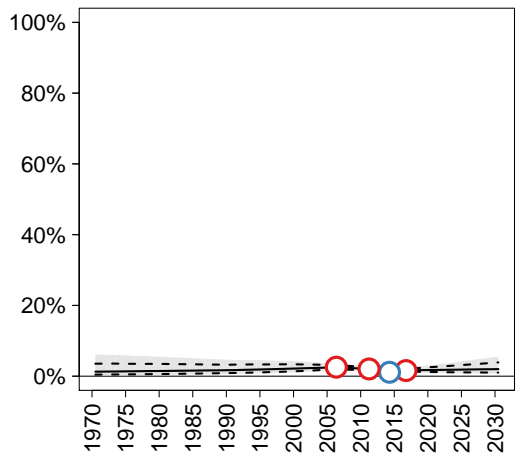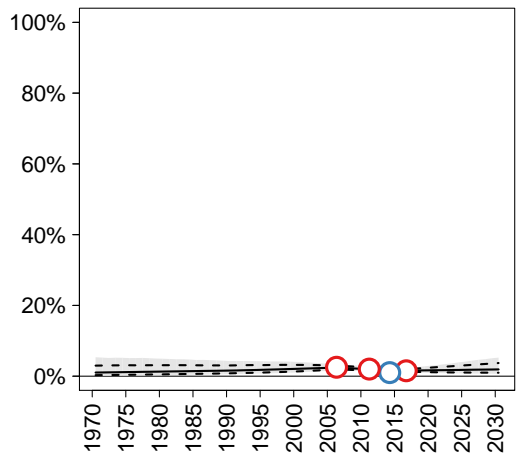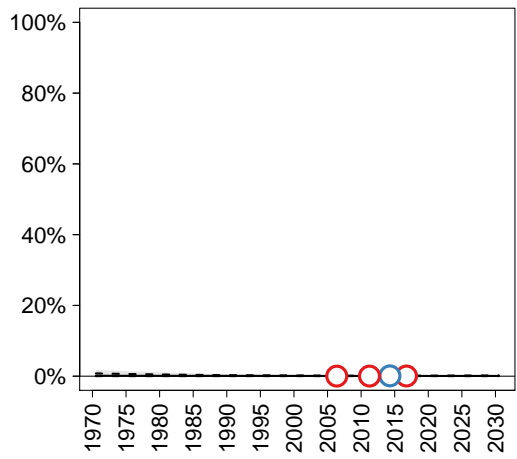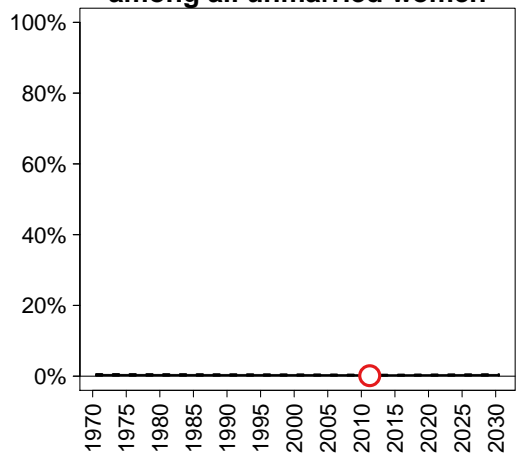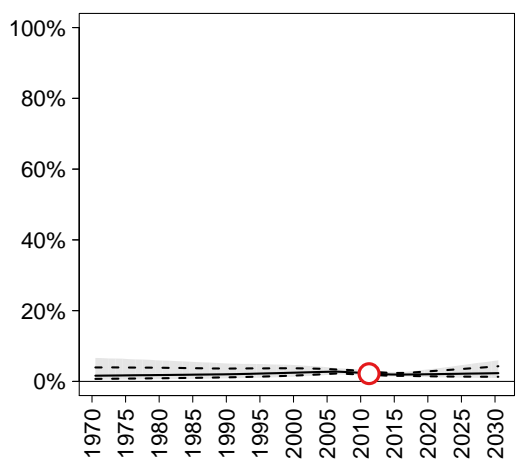

Netherlands (Western Europe, SA Group 1) --- Unmarried / Not In-Union

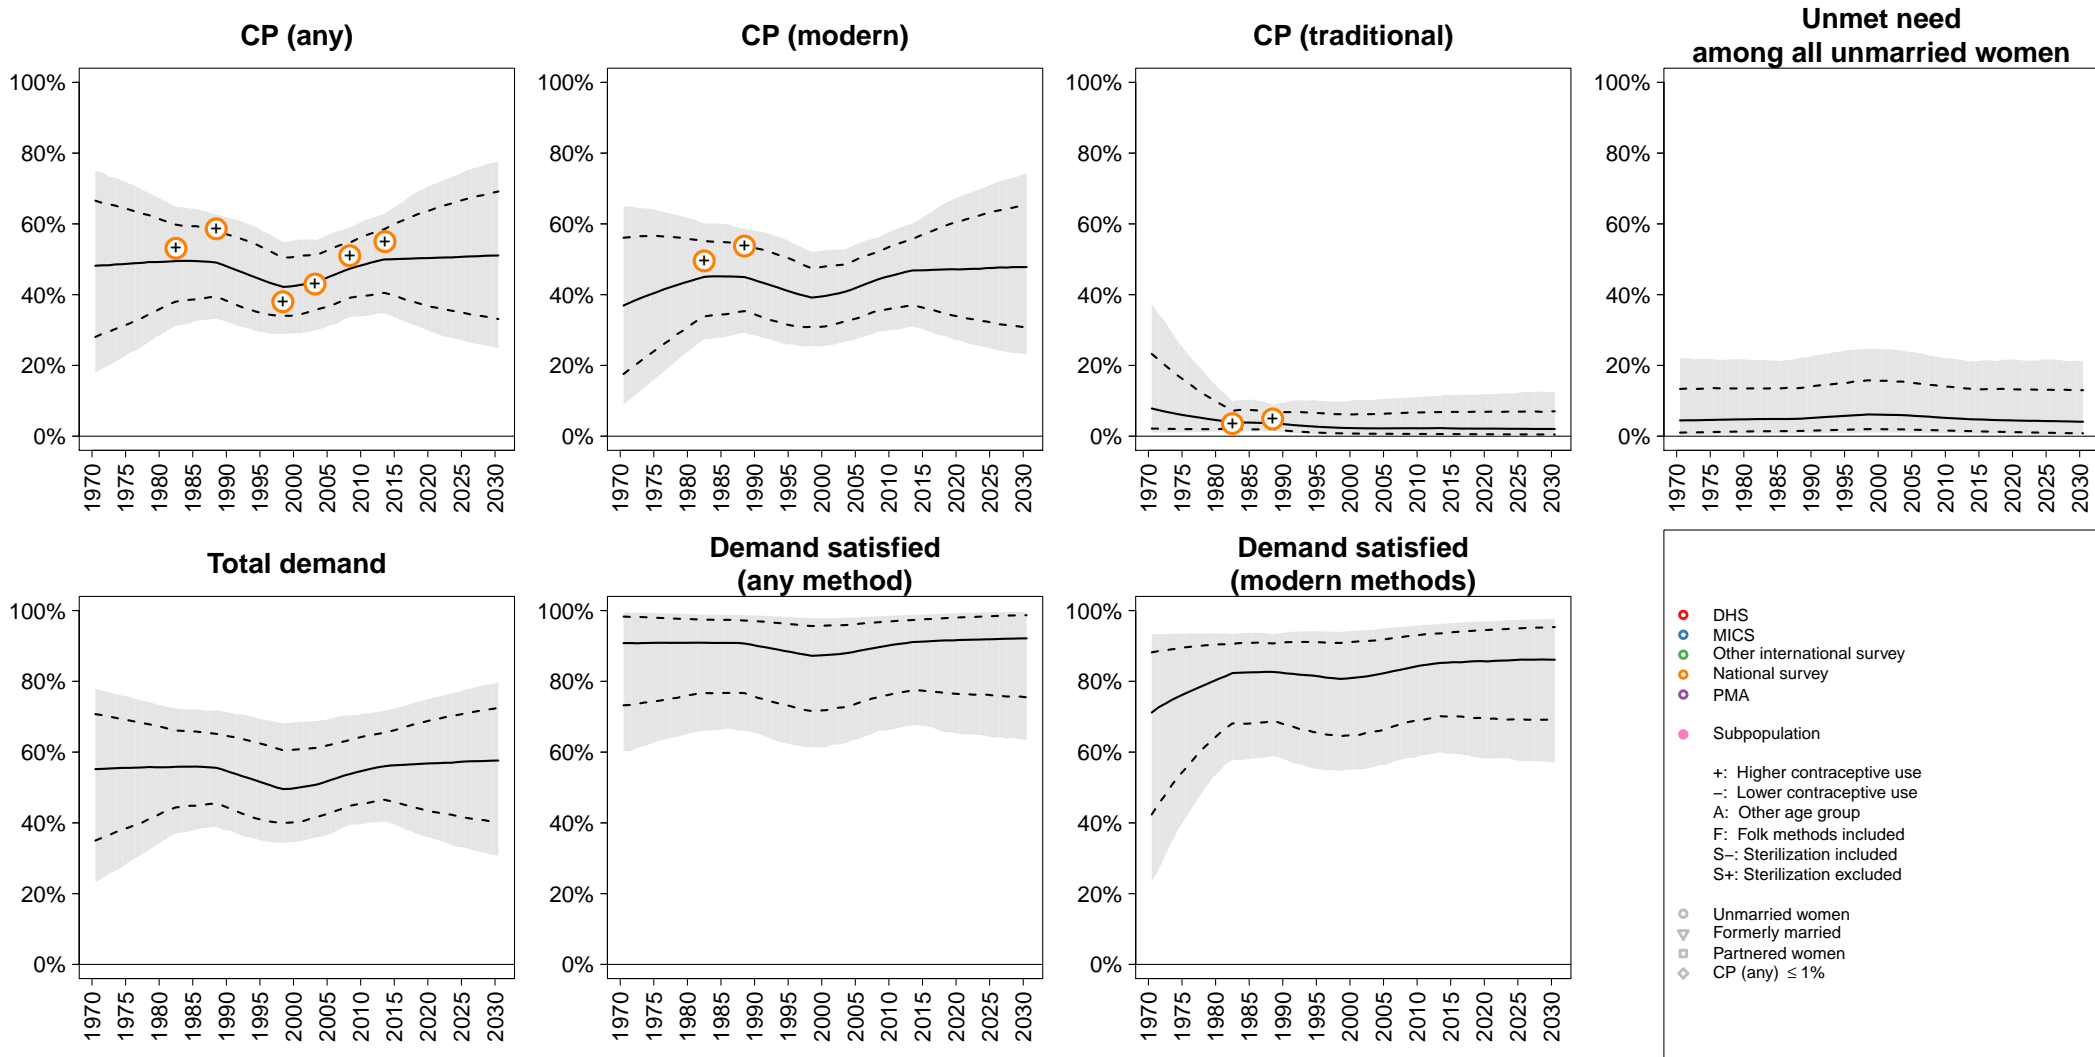



New Zealand (Australia and New Zealand, SA Group 1) --- Unmarried / Not In-Union

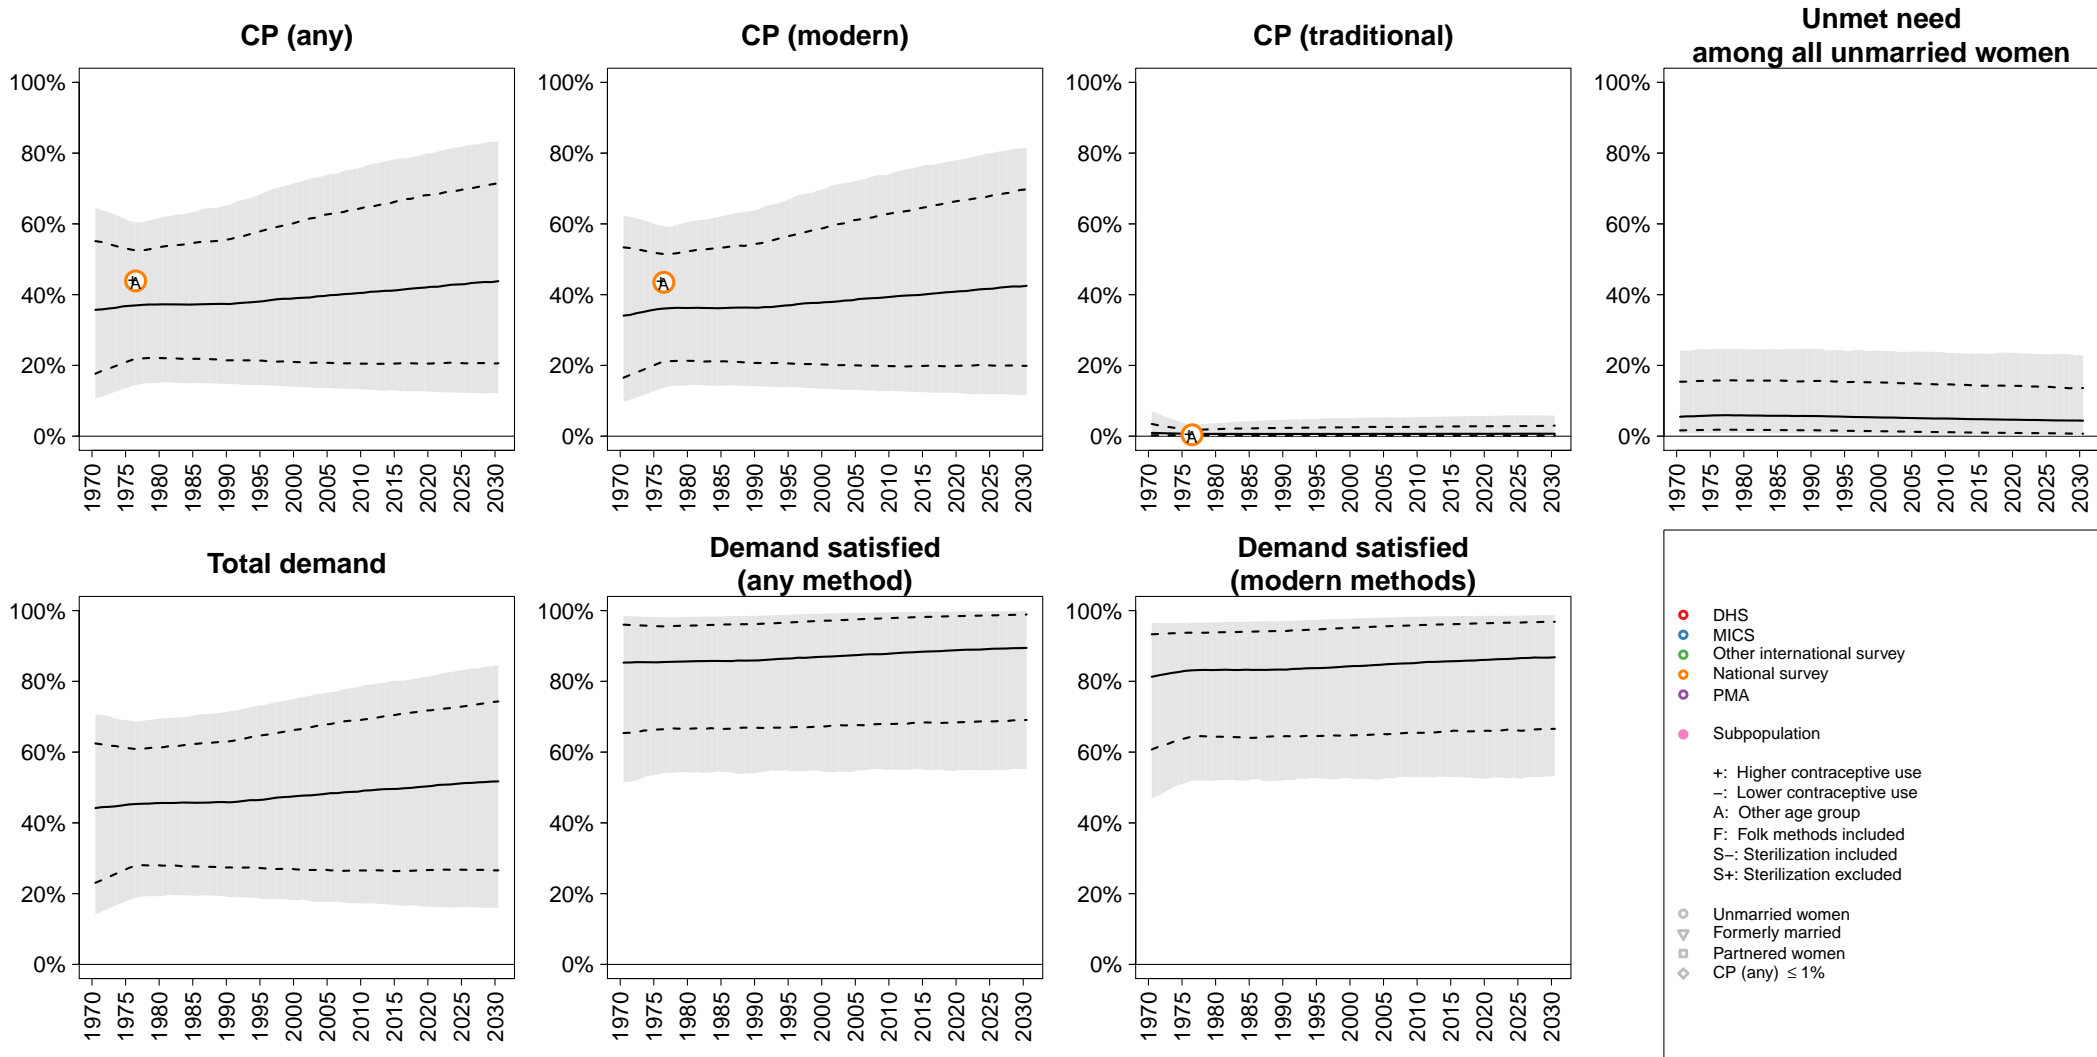

Nicaragua (Central America, SA Group 1) --- Unmarried / Not In-Union

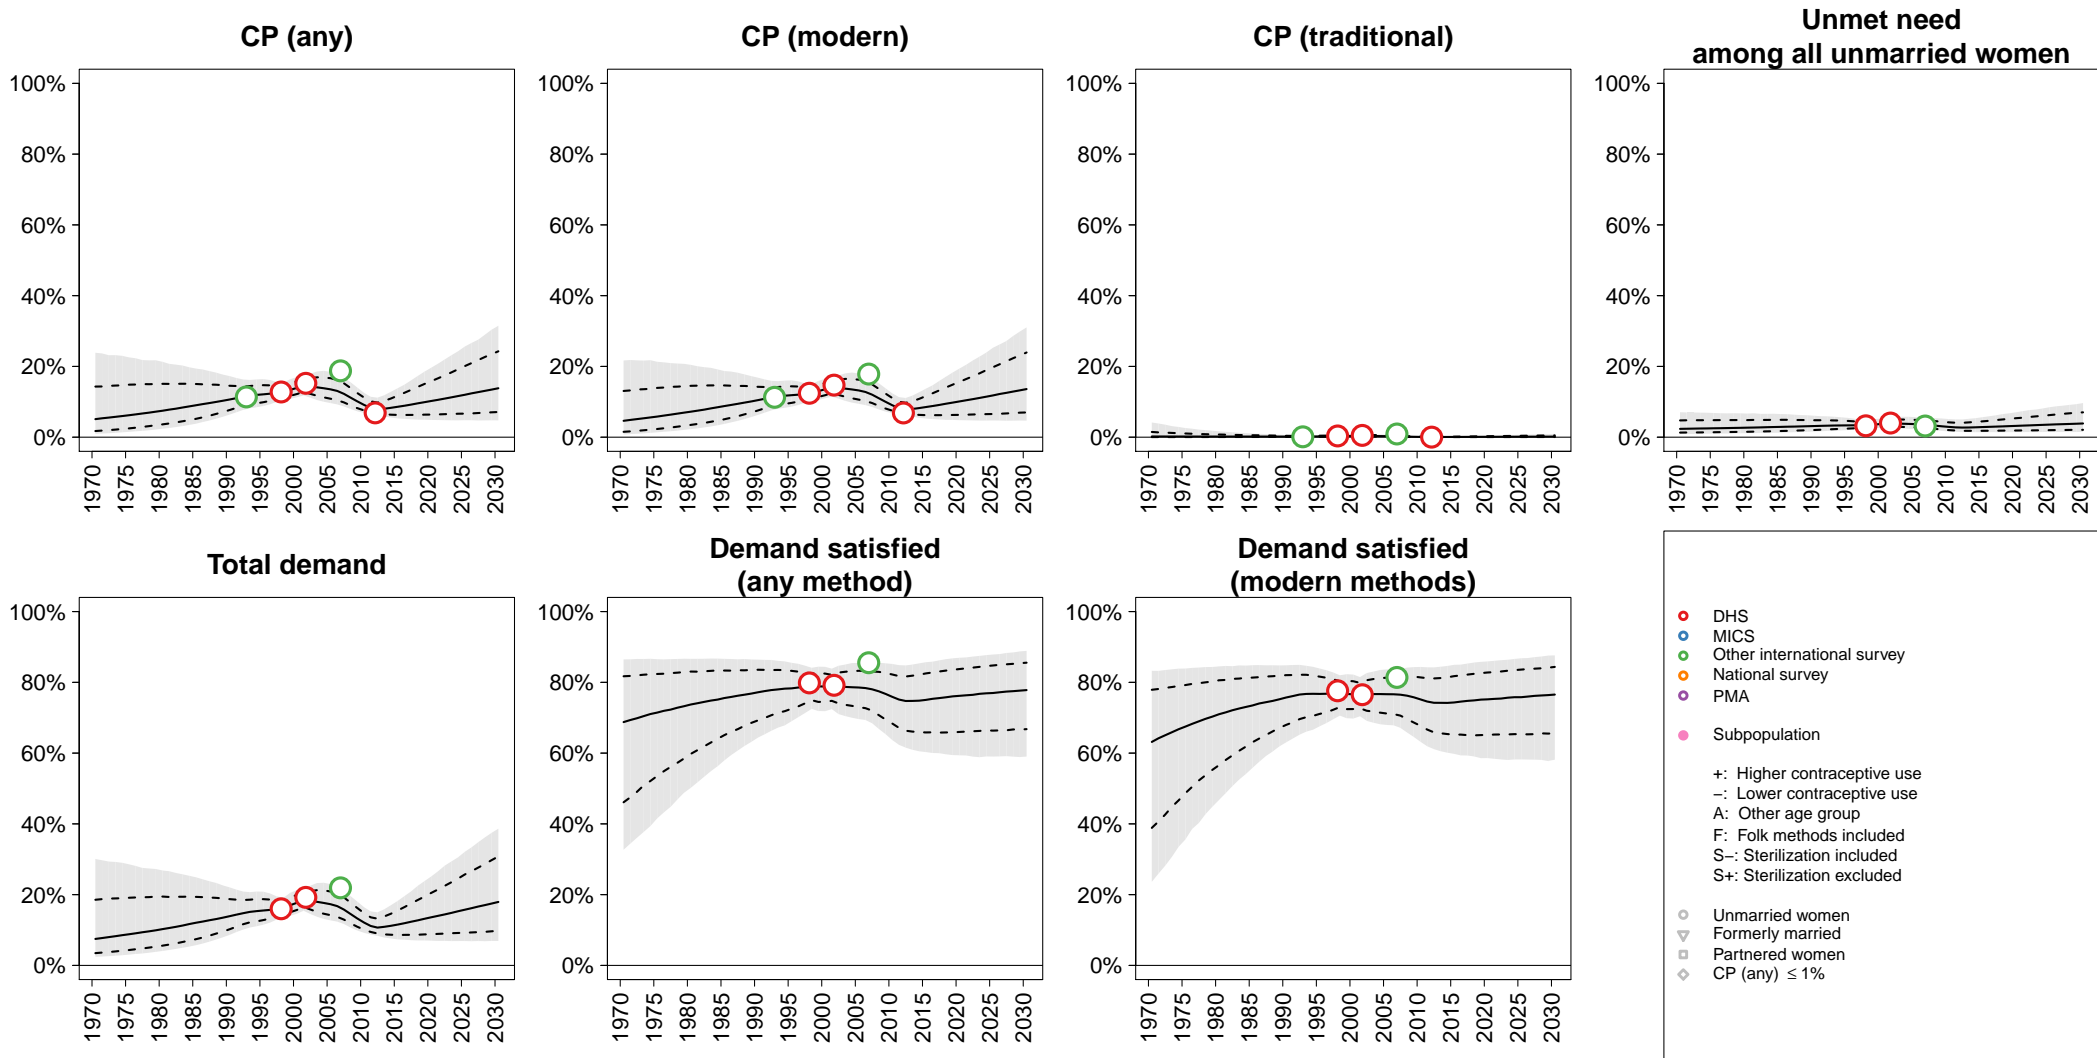

Niger (Western Africa, SA Group 0) --- Unmarried / Not In-Union

CP (any)

CP (modern)

CP (traditional)

Unmet need among all unmarried women

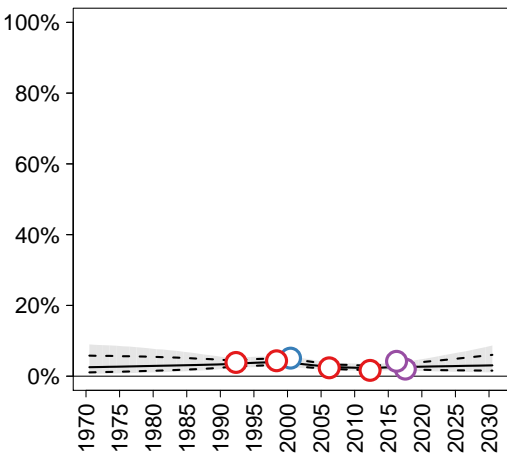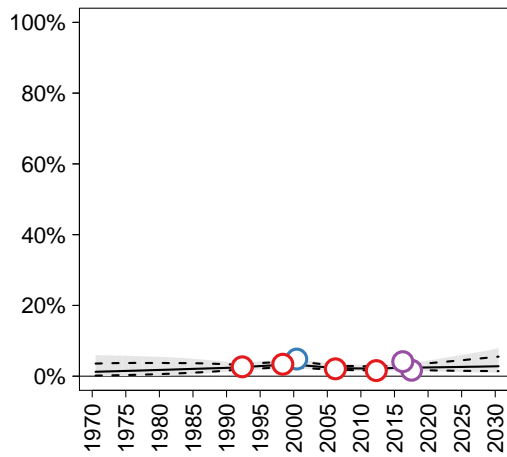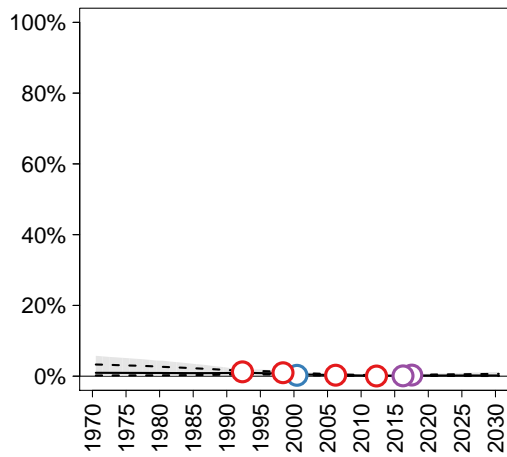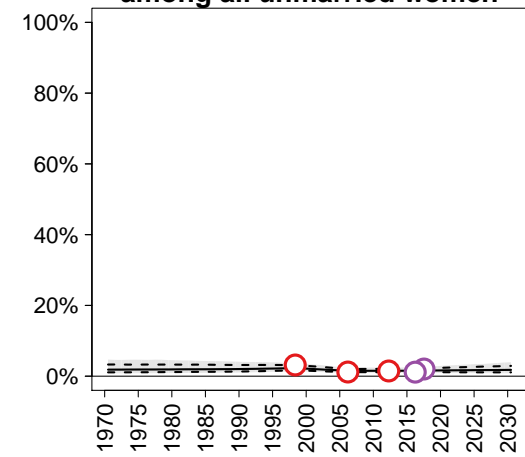

Total demand

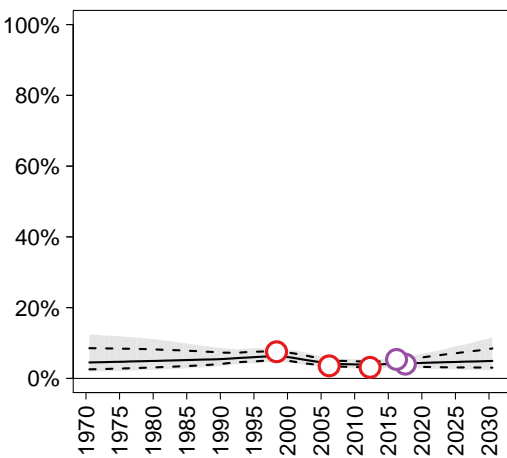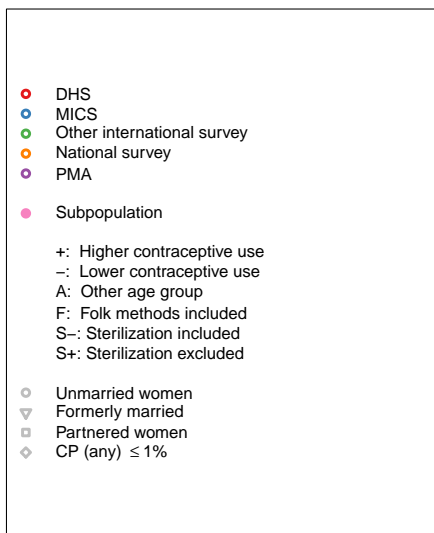

Nigeria (Western Africa, SA Group 1) --- Unmarried / Not In-Union

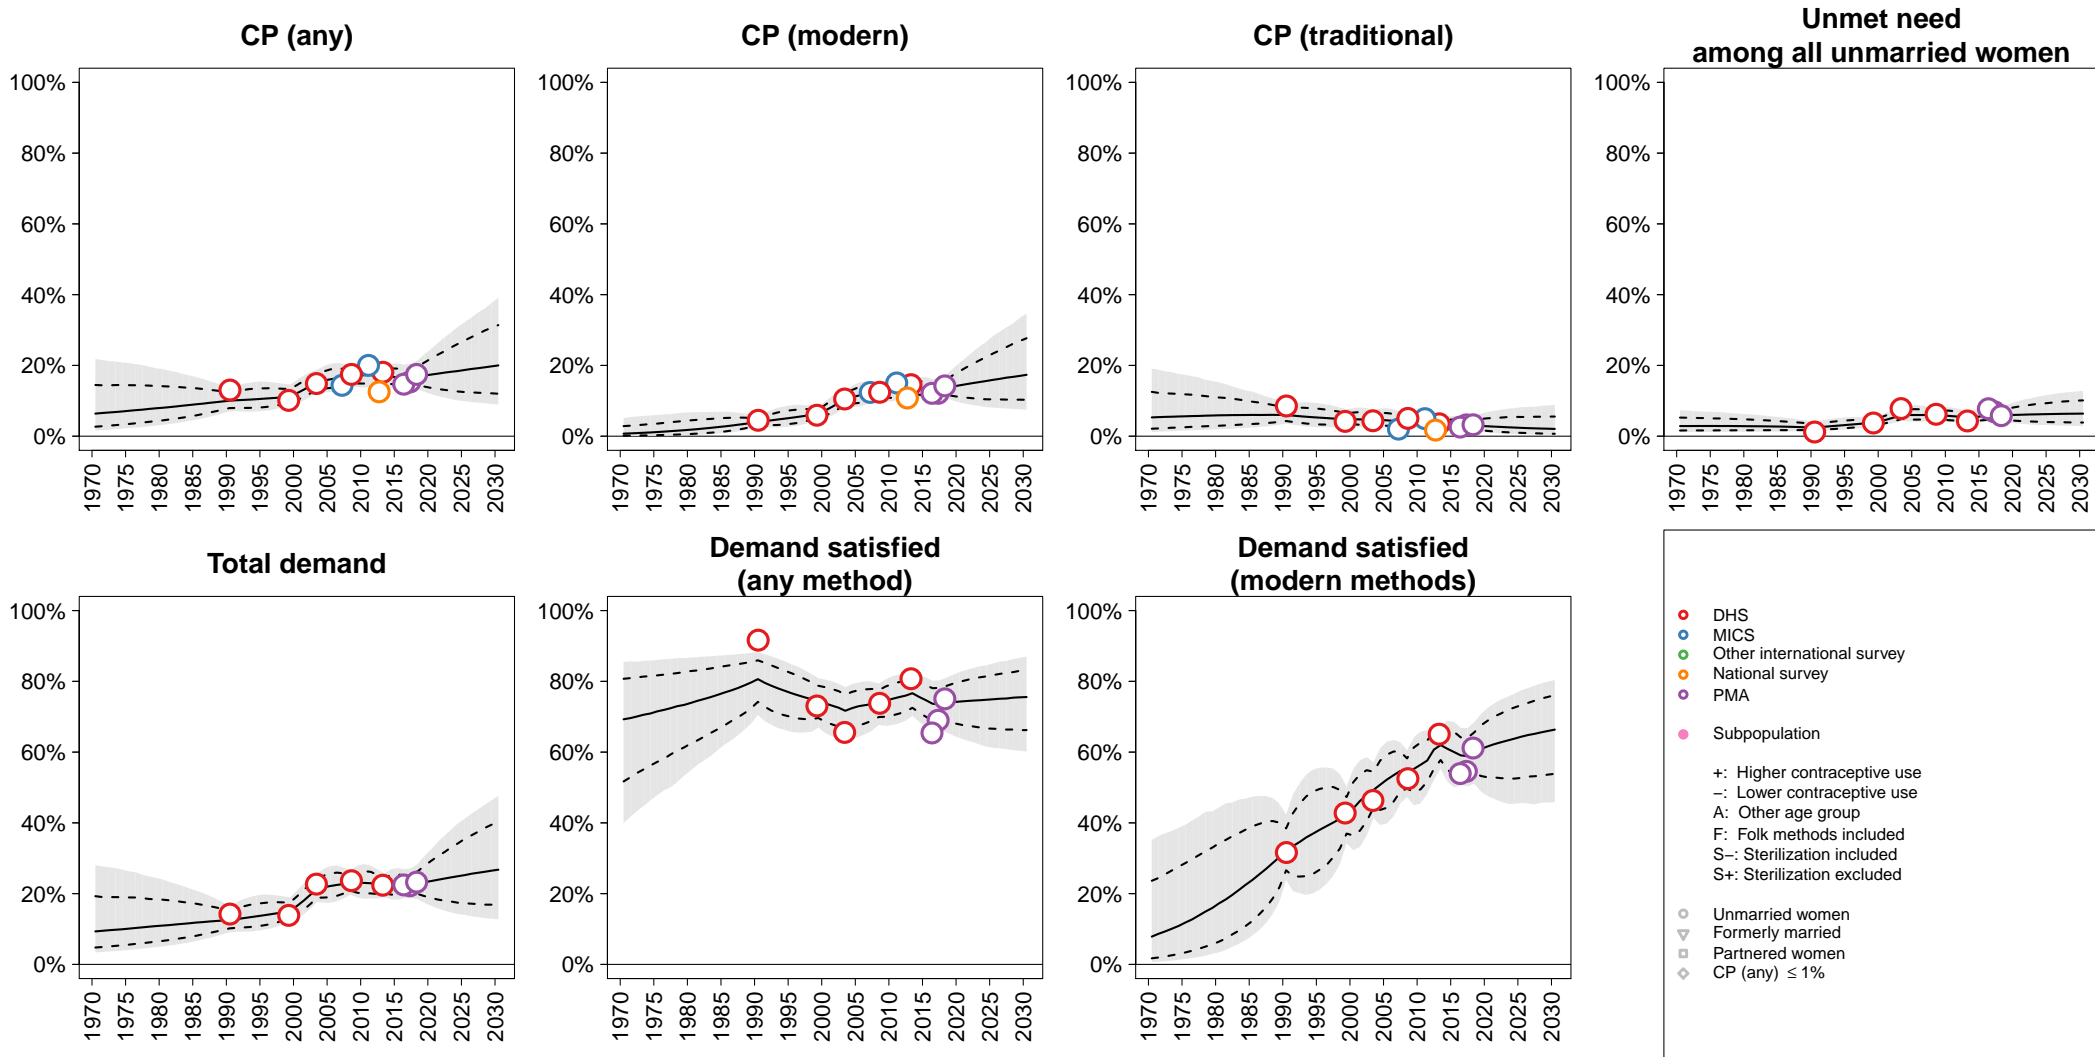

Norway (Northern Europe, SA Group 1) --- Unmarried / Not In-Union

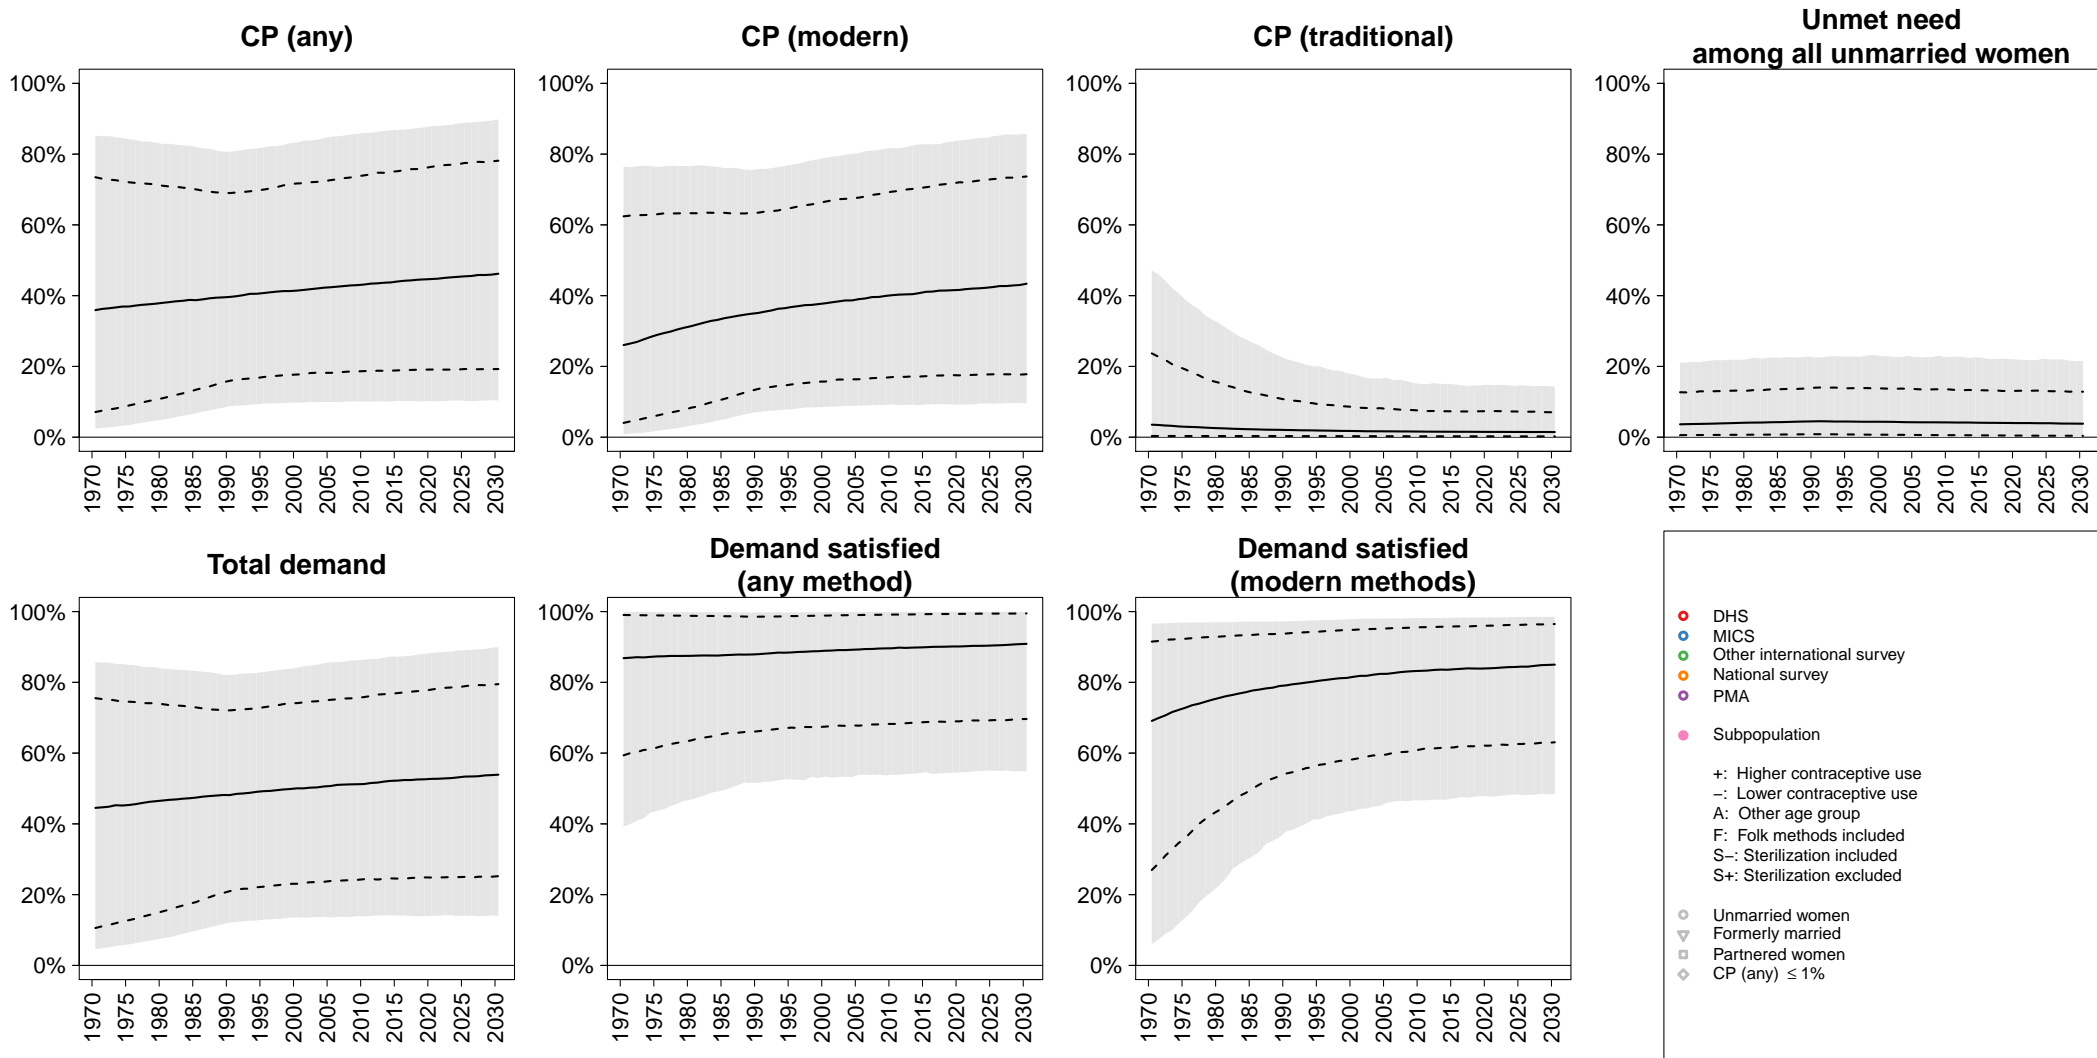

Oman (Western Asia, SA Group 0) --- Unmarried / Not In-Union

CP (any)

CP (modern)

CP (traditional)

Unmet need among all unmarried women

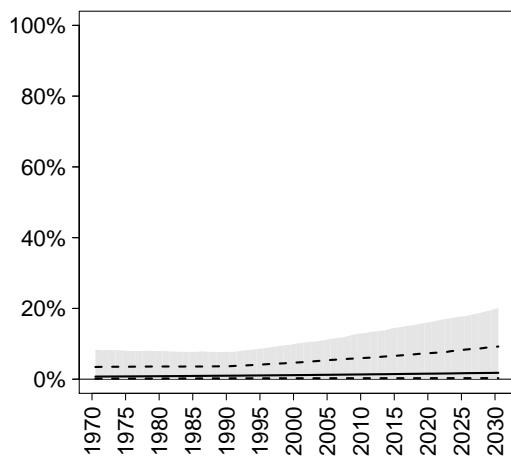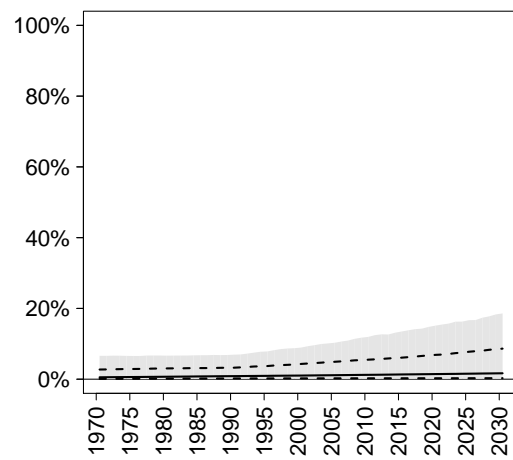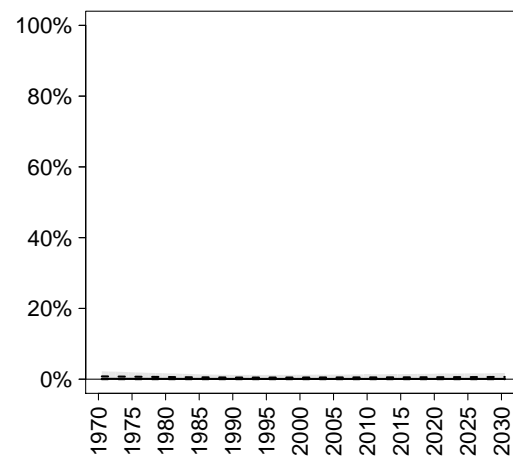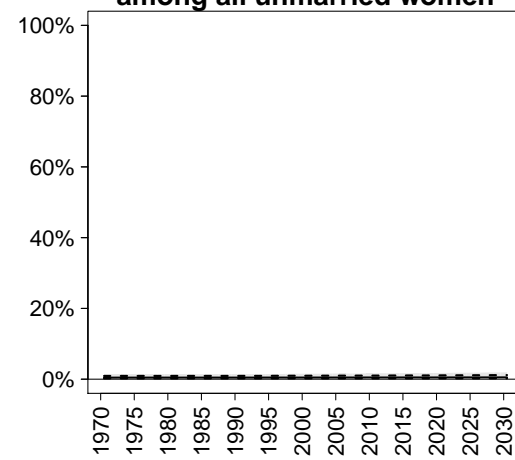

Total demand

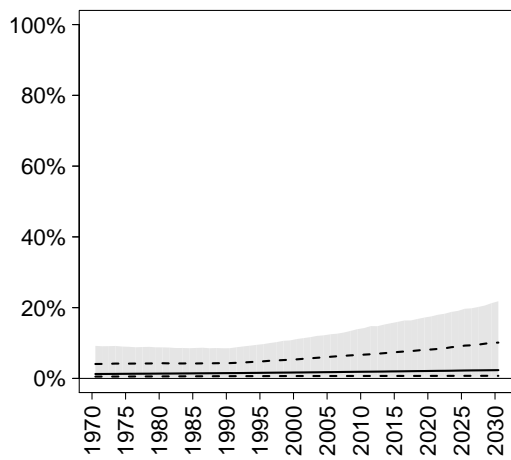

- DHS
- MICS
- Other international survey
- National survey
- PMA
- Subpopulation
- +: Higher contraceptive use
- : Lower contraceptive use
- A: Other age group
- F: Folk methods included
- S-: Sterilization included
- S+: Sterilization excluded
- Unmarried women
- ▽ Formerly married
- ◻ Partnered women
- ◇ CP (any) ≤ 1%

Pakistan (Southern Asia, SA Group 0) --- Unmarried / Not In-Union

CP (any)

CP (modern)

CP (traditional)

Unmet need among all unmarried women

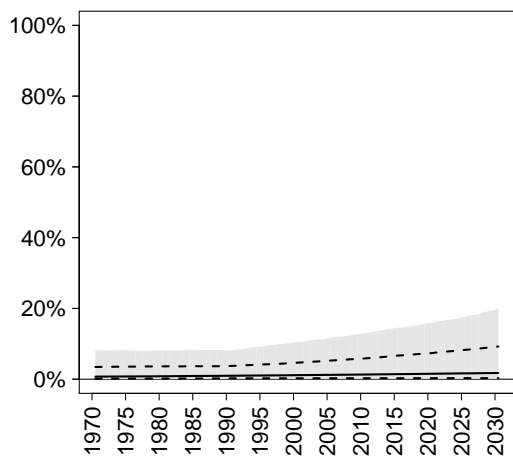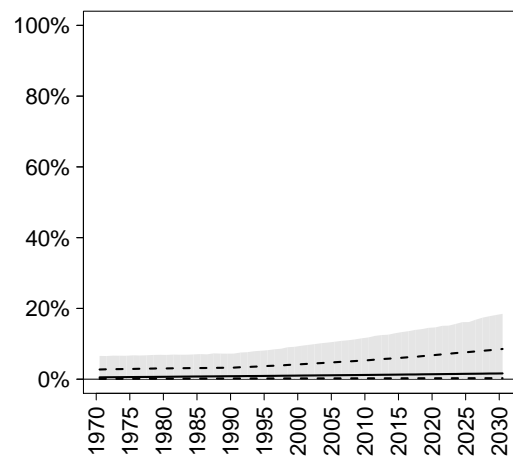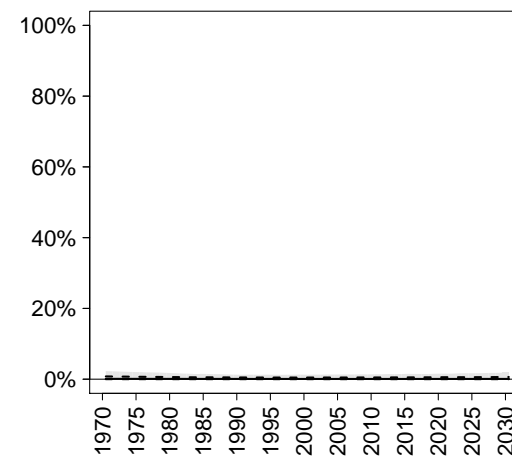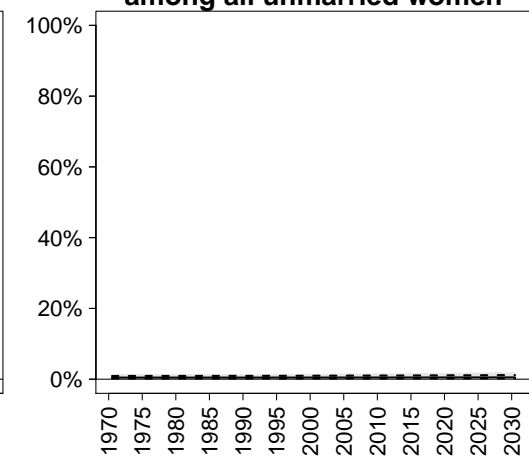

Total demand

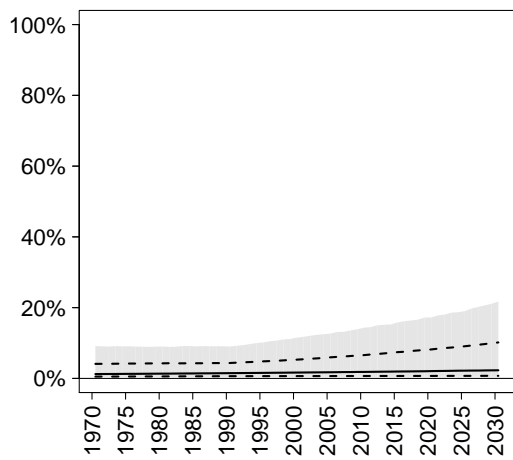

- DHS
- MICS
- Other international survey
- National survey
- PMA
- Subpopulation
- +: Higher contraceptive use
- : Lower contraceptive use
- A: Other age group
- F: Folk methods included
- S-: Sterilization included
- S+: Sterilization excluded
- Unmarried women
- ▽ Formerly married
- ◻ Partnered women
- ◇ CP (any) ≤ 1%

Panama (Central America, SA Group 1) --- Unmarried / Not In-Union

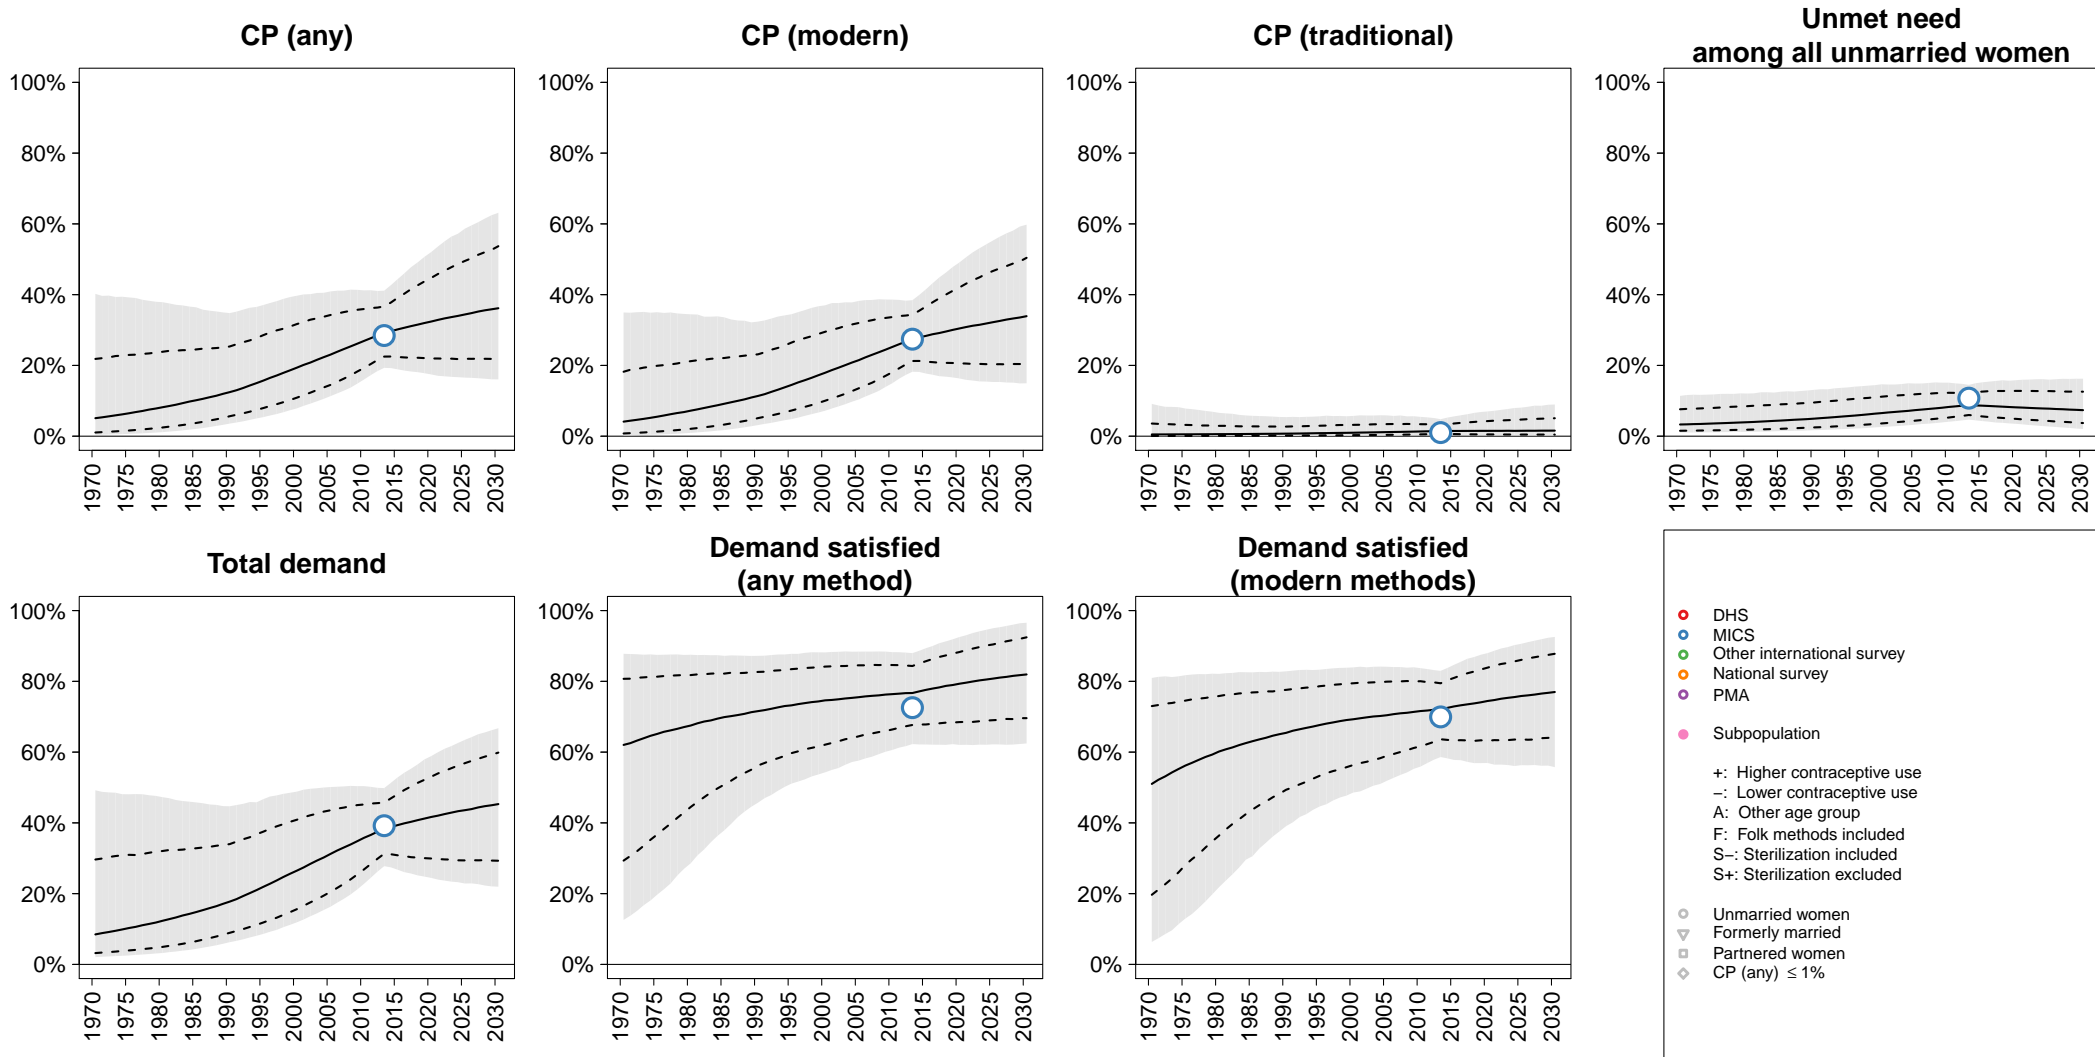



Papua New Guinea (Melanesia, SA Group 1) --- Unmarried / Not In-Union

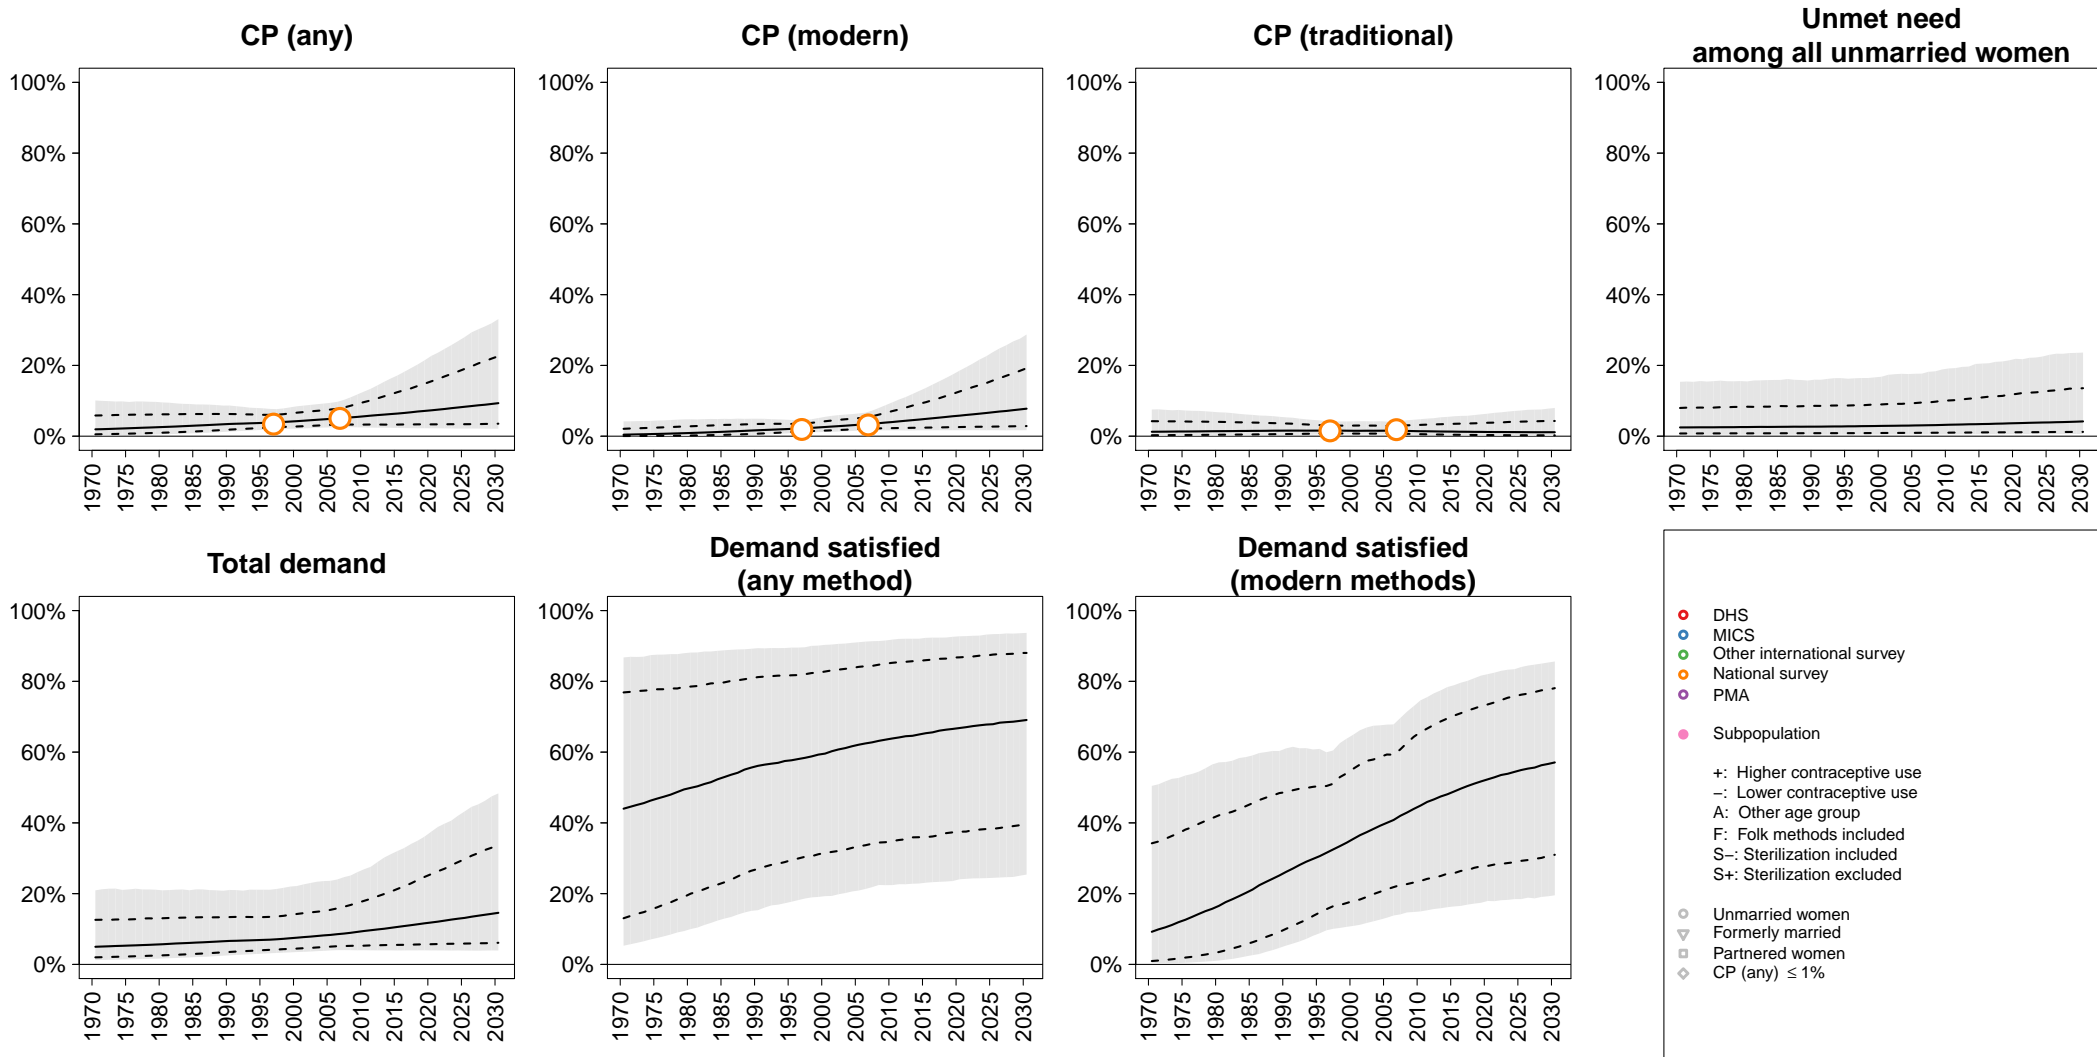

Paraguay (South America, SA Group 1) --- Unmarried / Not In-Union

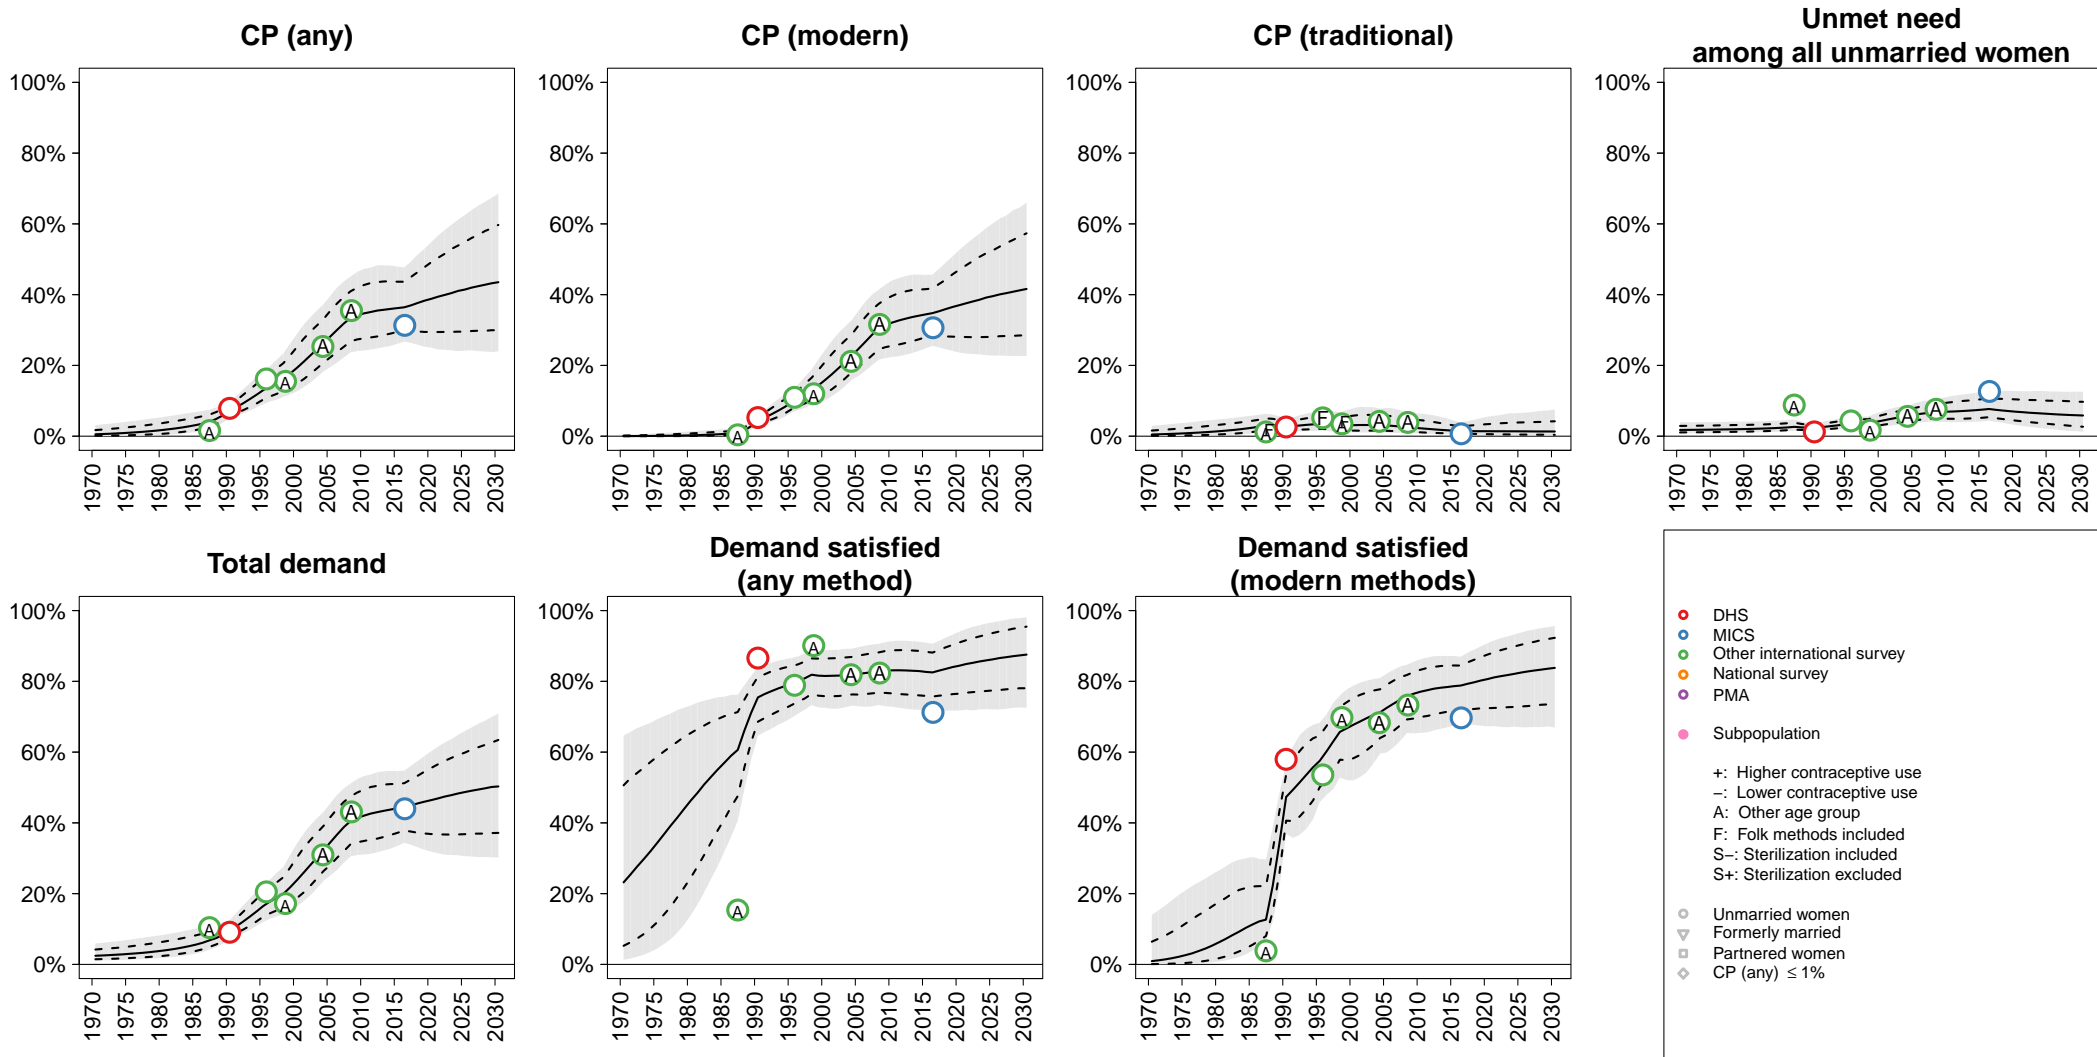

Peru (South America, SA Group 1) --- Unmarried / Not In-Union

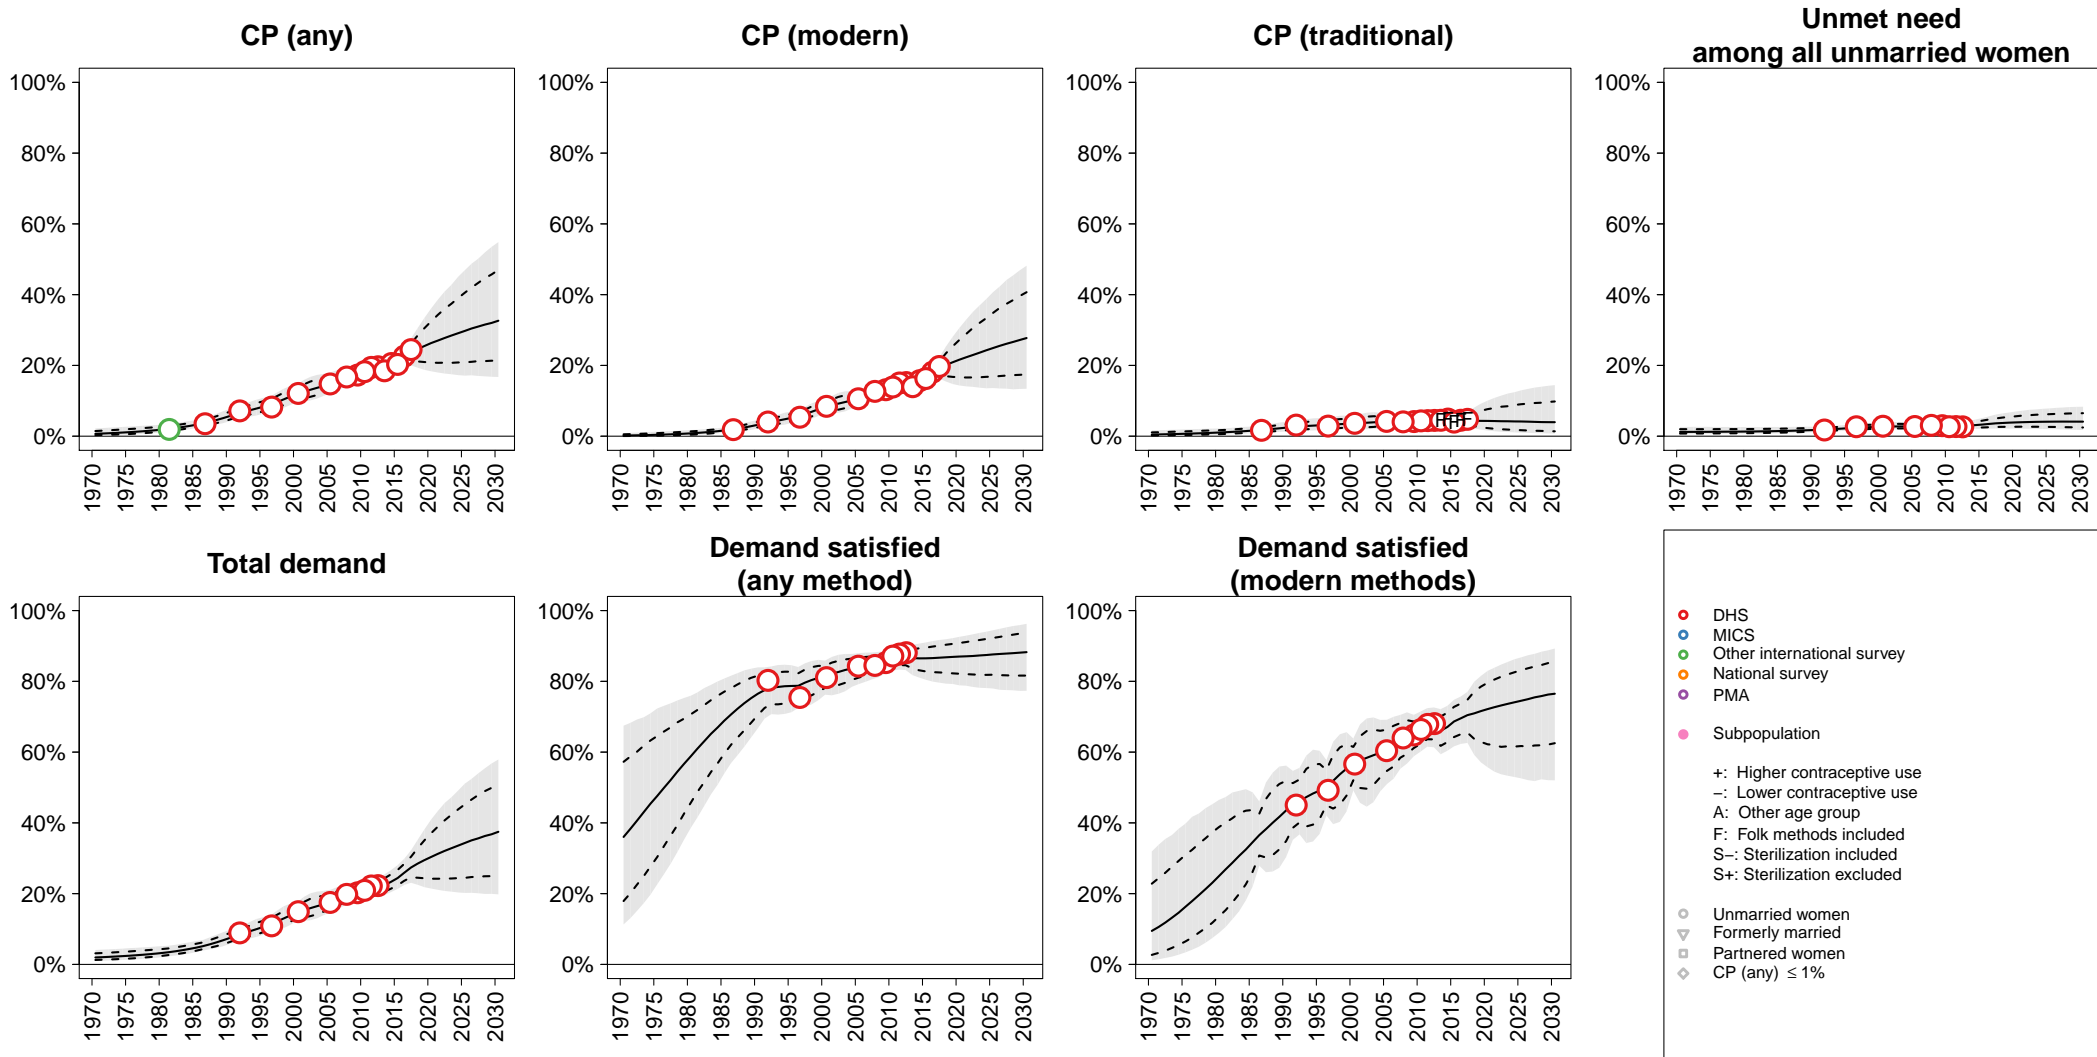

Philippines (South-eastern Asia, SA Group 1) --- Unmarried / Not In-Union

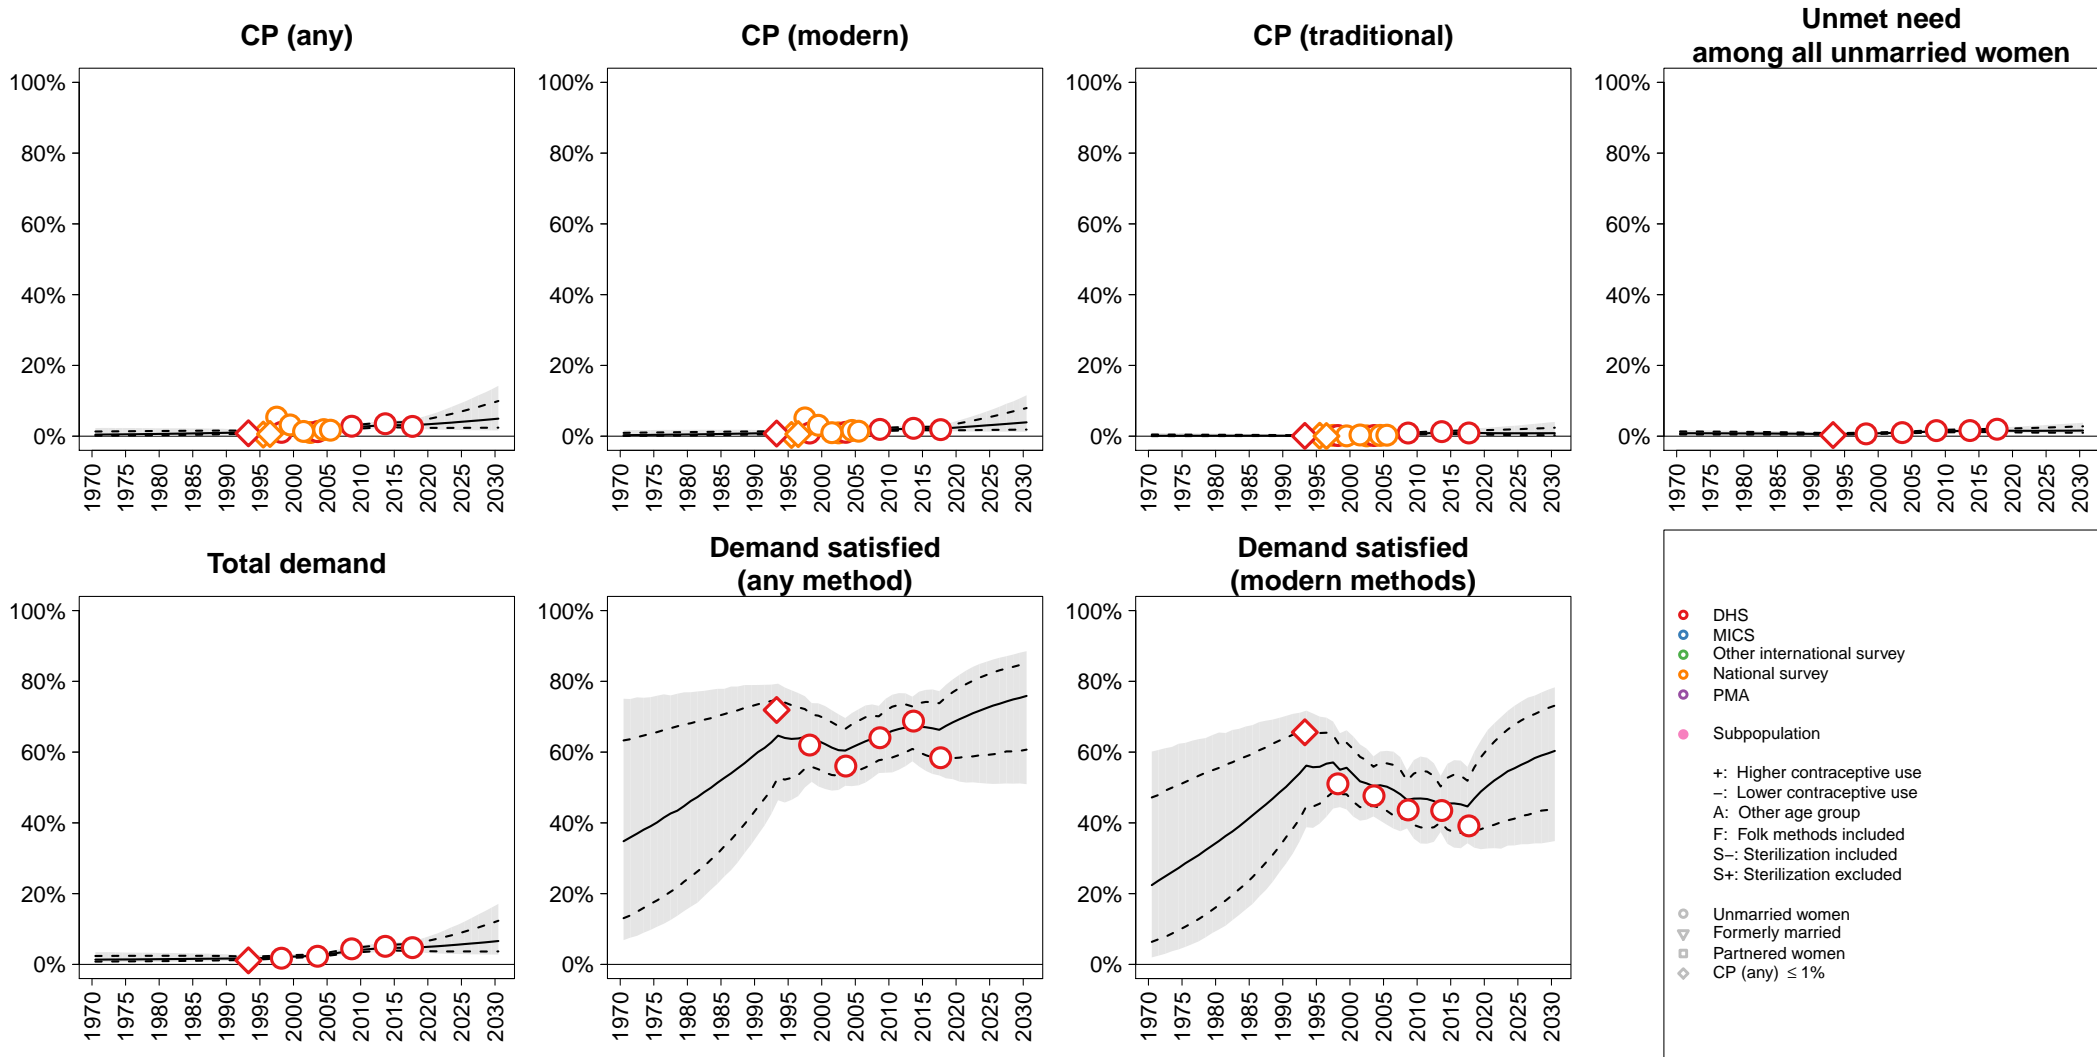

Poland (Eastern Europe, SA Group 1) --- Unmarried / Not In-Union

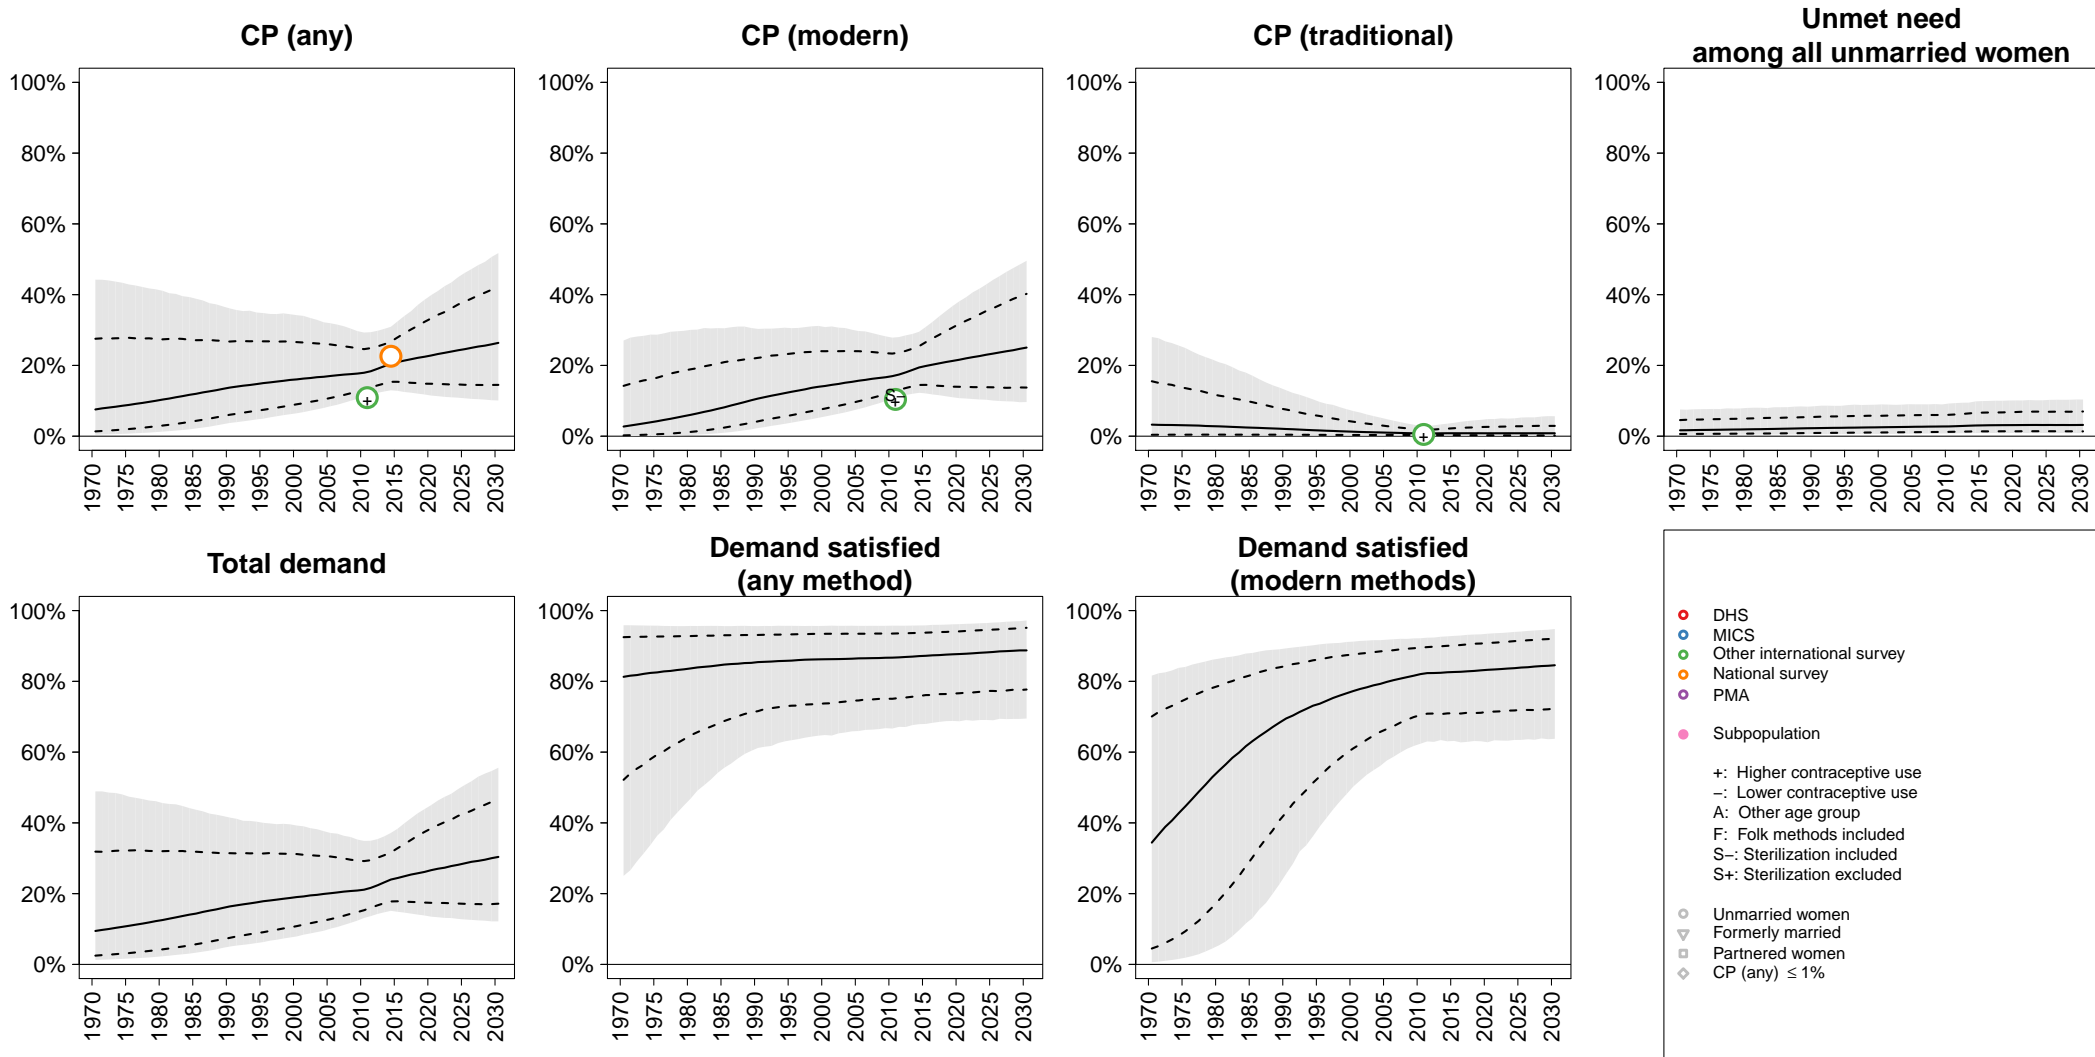

Portugal (Southern Europe, SA Group 1) --- Unmarried / Not In-Union

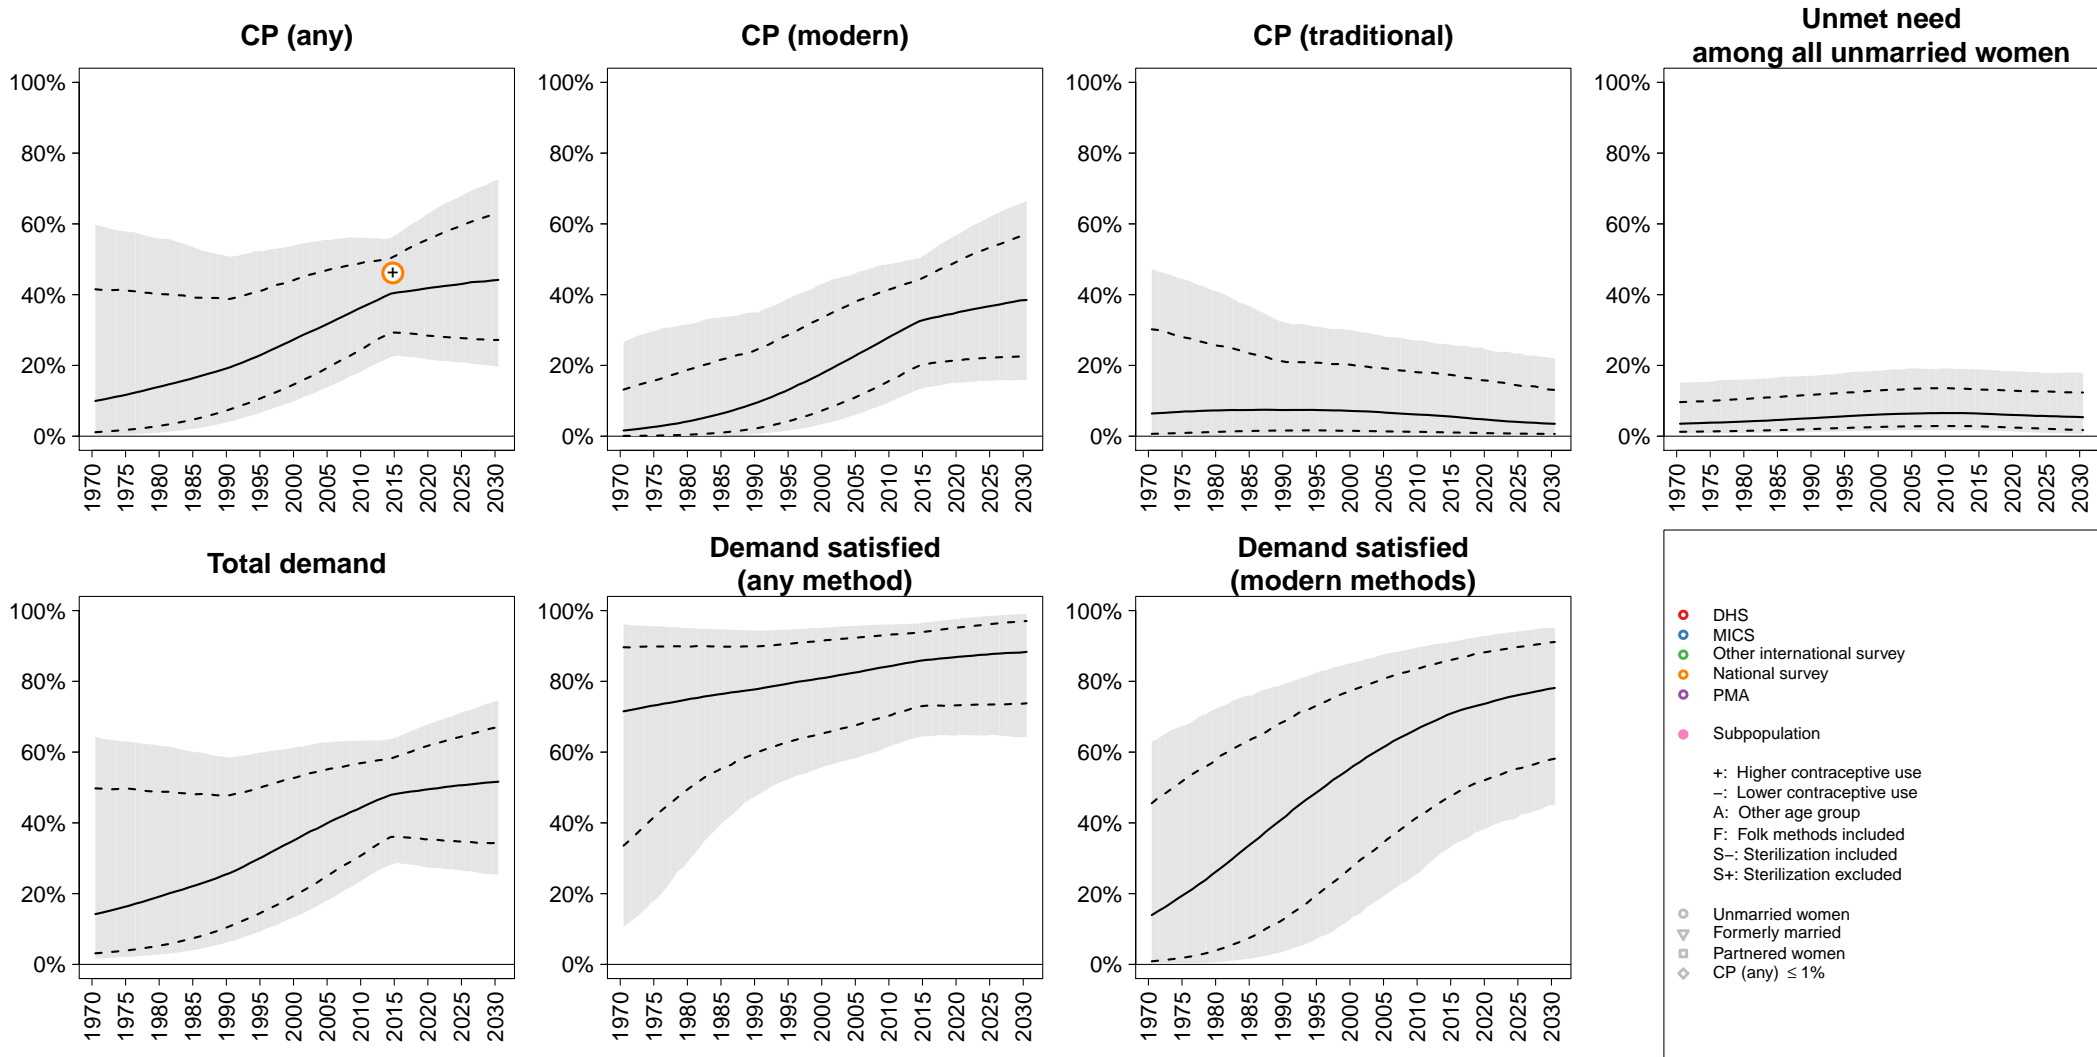

Puerto Rico (Caribbean, SA Group 1) --- Unmarried / Not In-Union

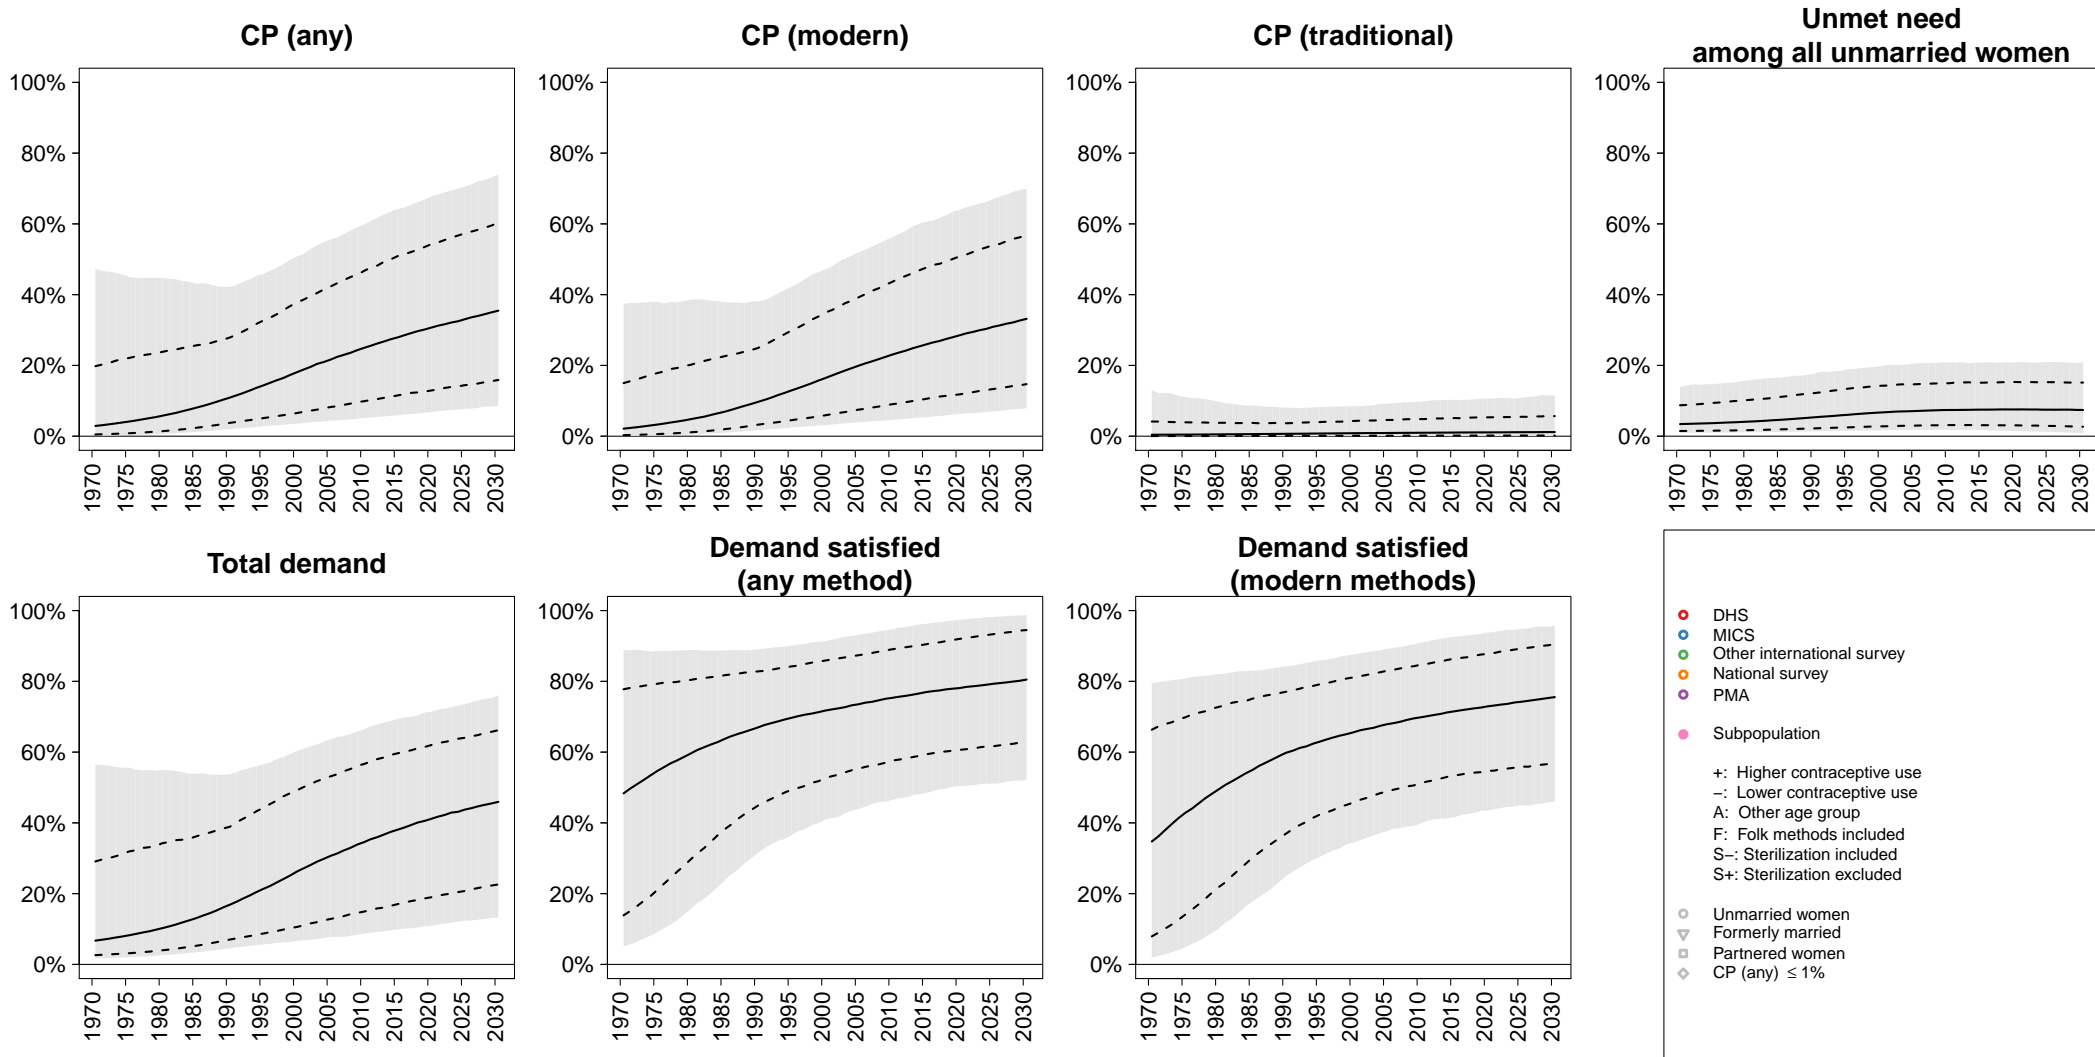

Qatar (Western Asia, SA Group 0) --- Unmarried / Not In-Union

CP (any)

CP (modern)

CP (traditional)

Unmet need among all unmarried women

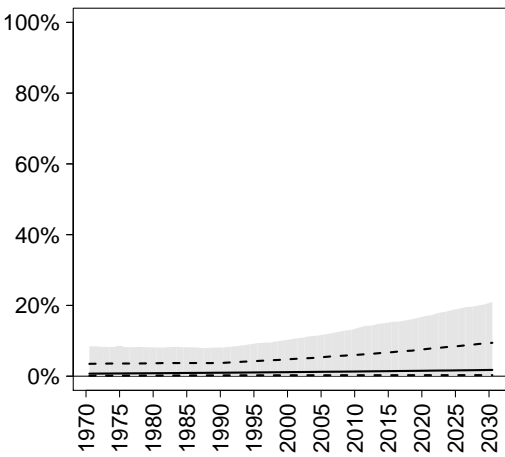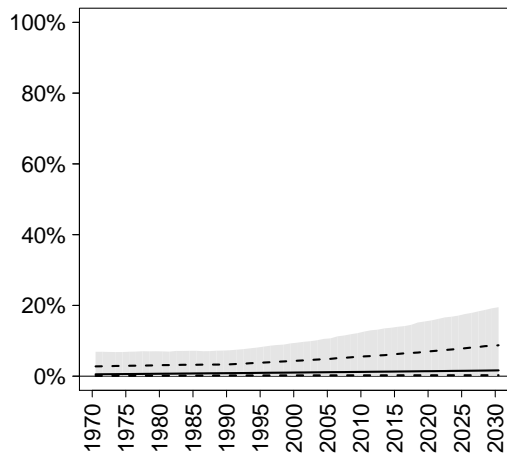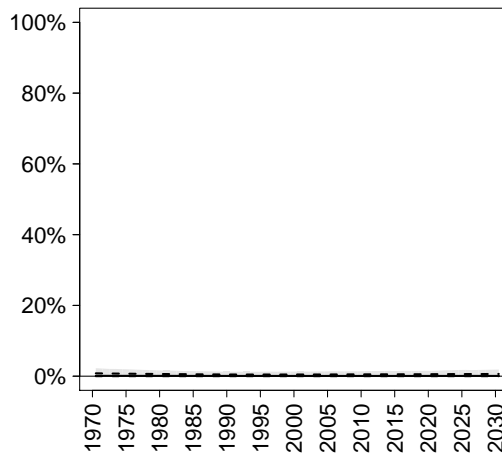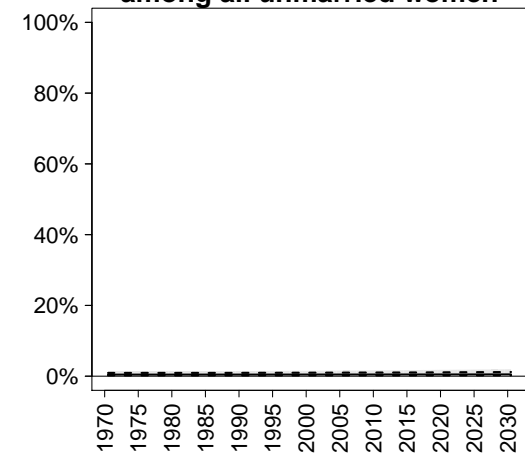

Total demand

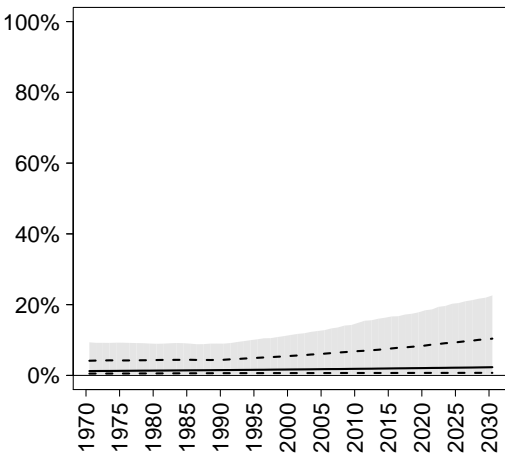



Republic of Korea (Eastern Asia, SA Group 1) --- Unmarried / Not In-Union

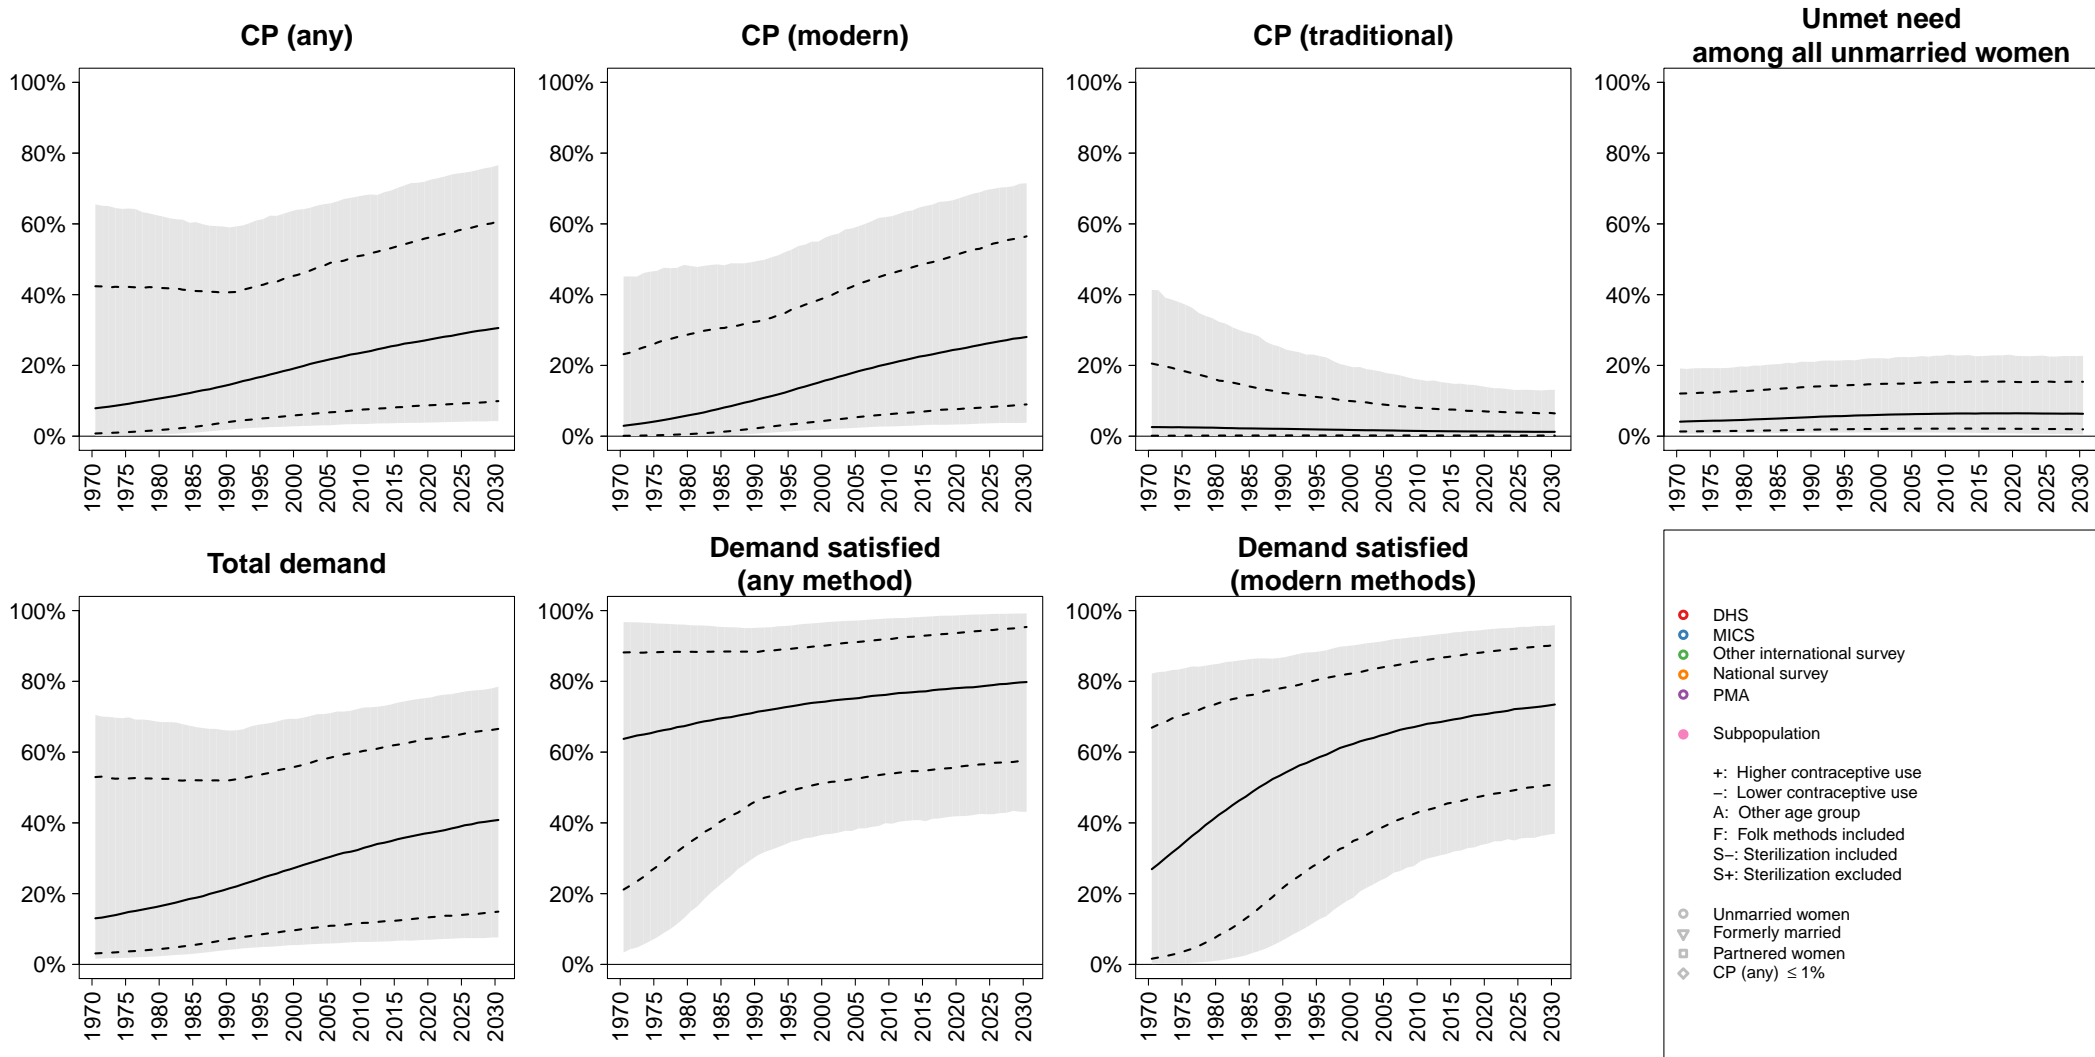

Republic of Moldova (Eastern Europe, SA Group 1) --- Unmarried / Not In-Union

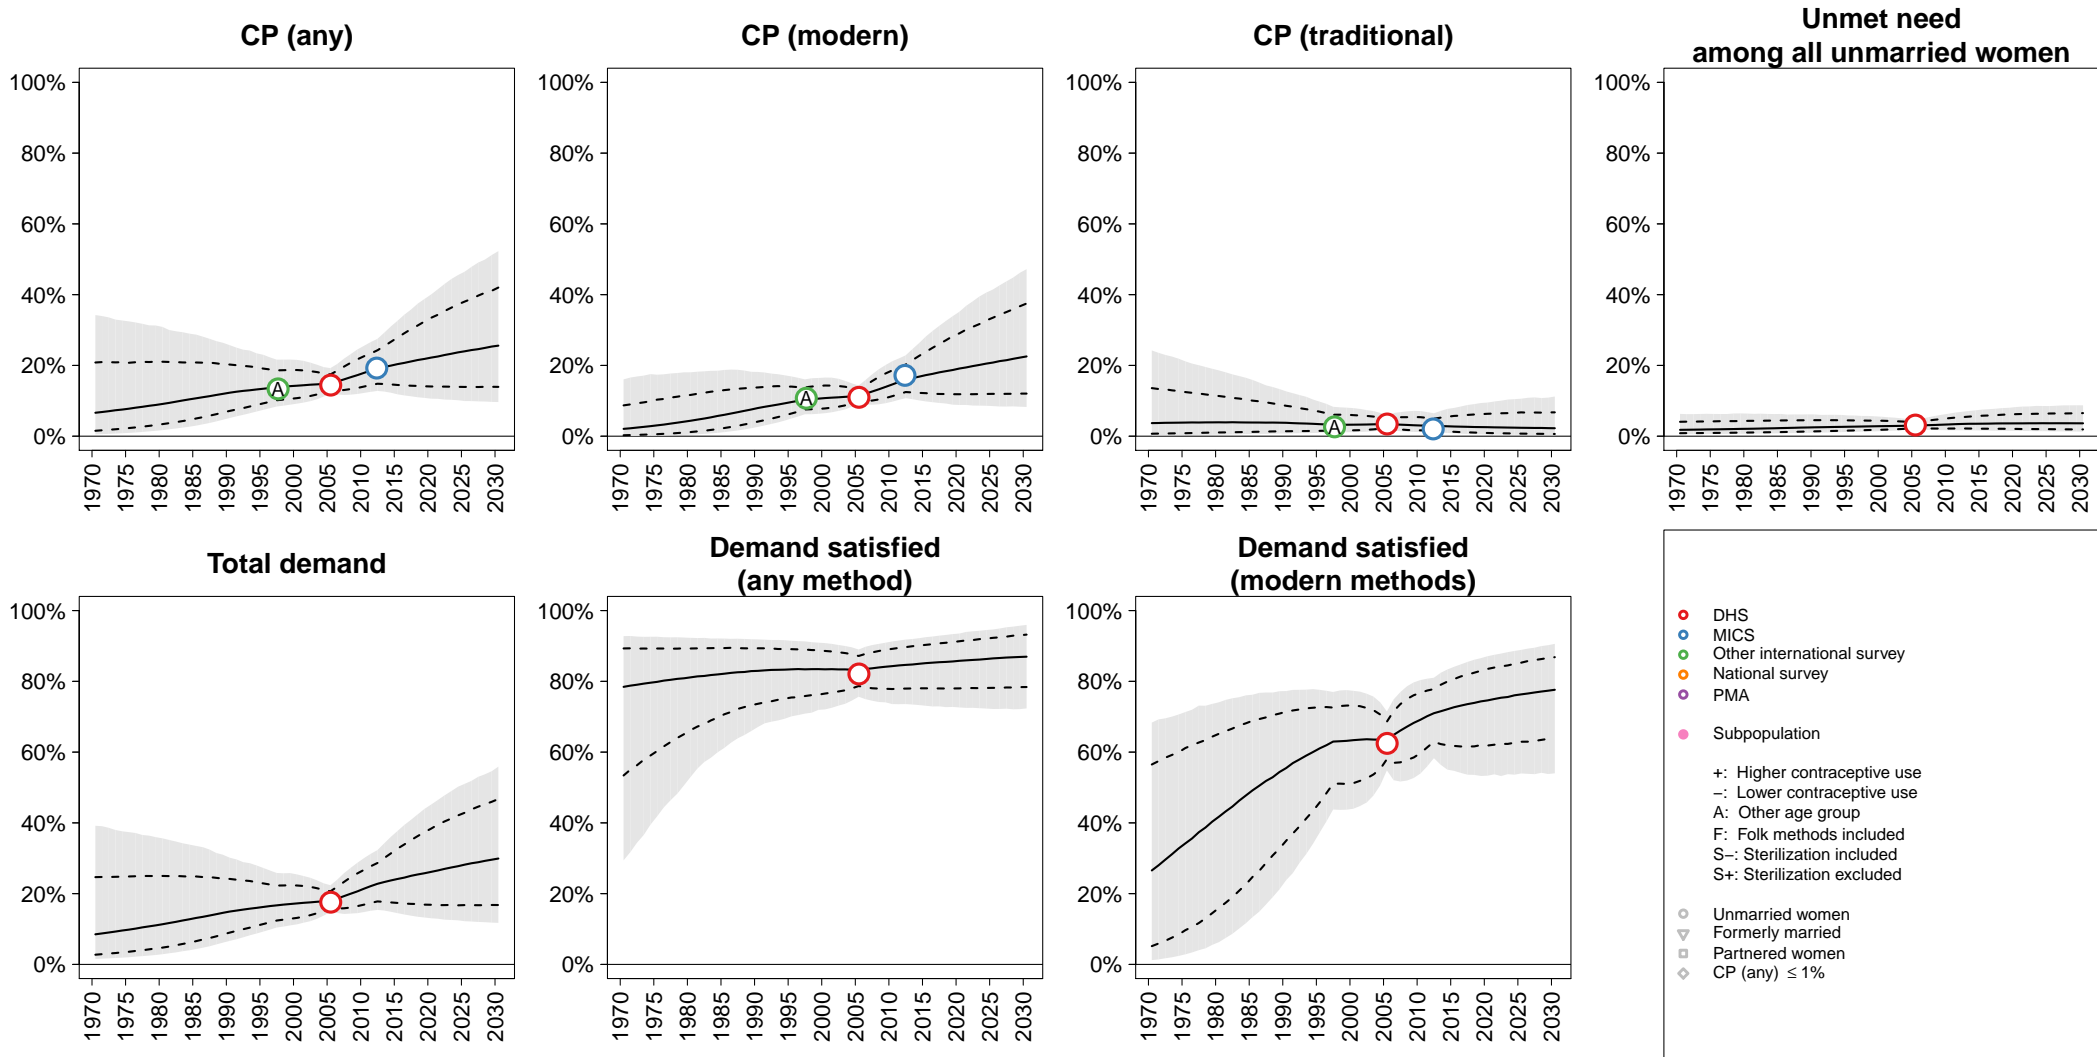

Réunion (Eastern Africa, SA Group 1) --- Unmarried / Not In-Union

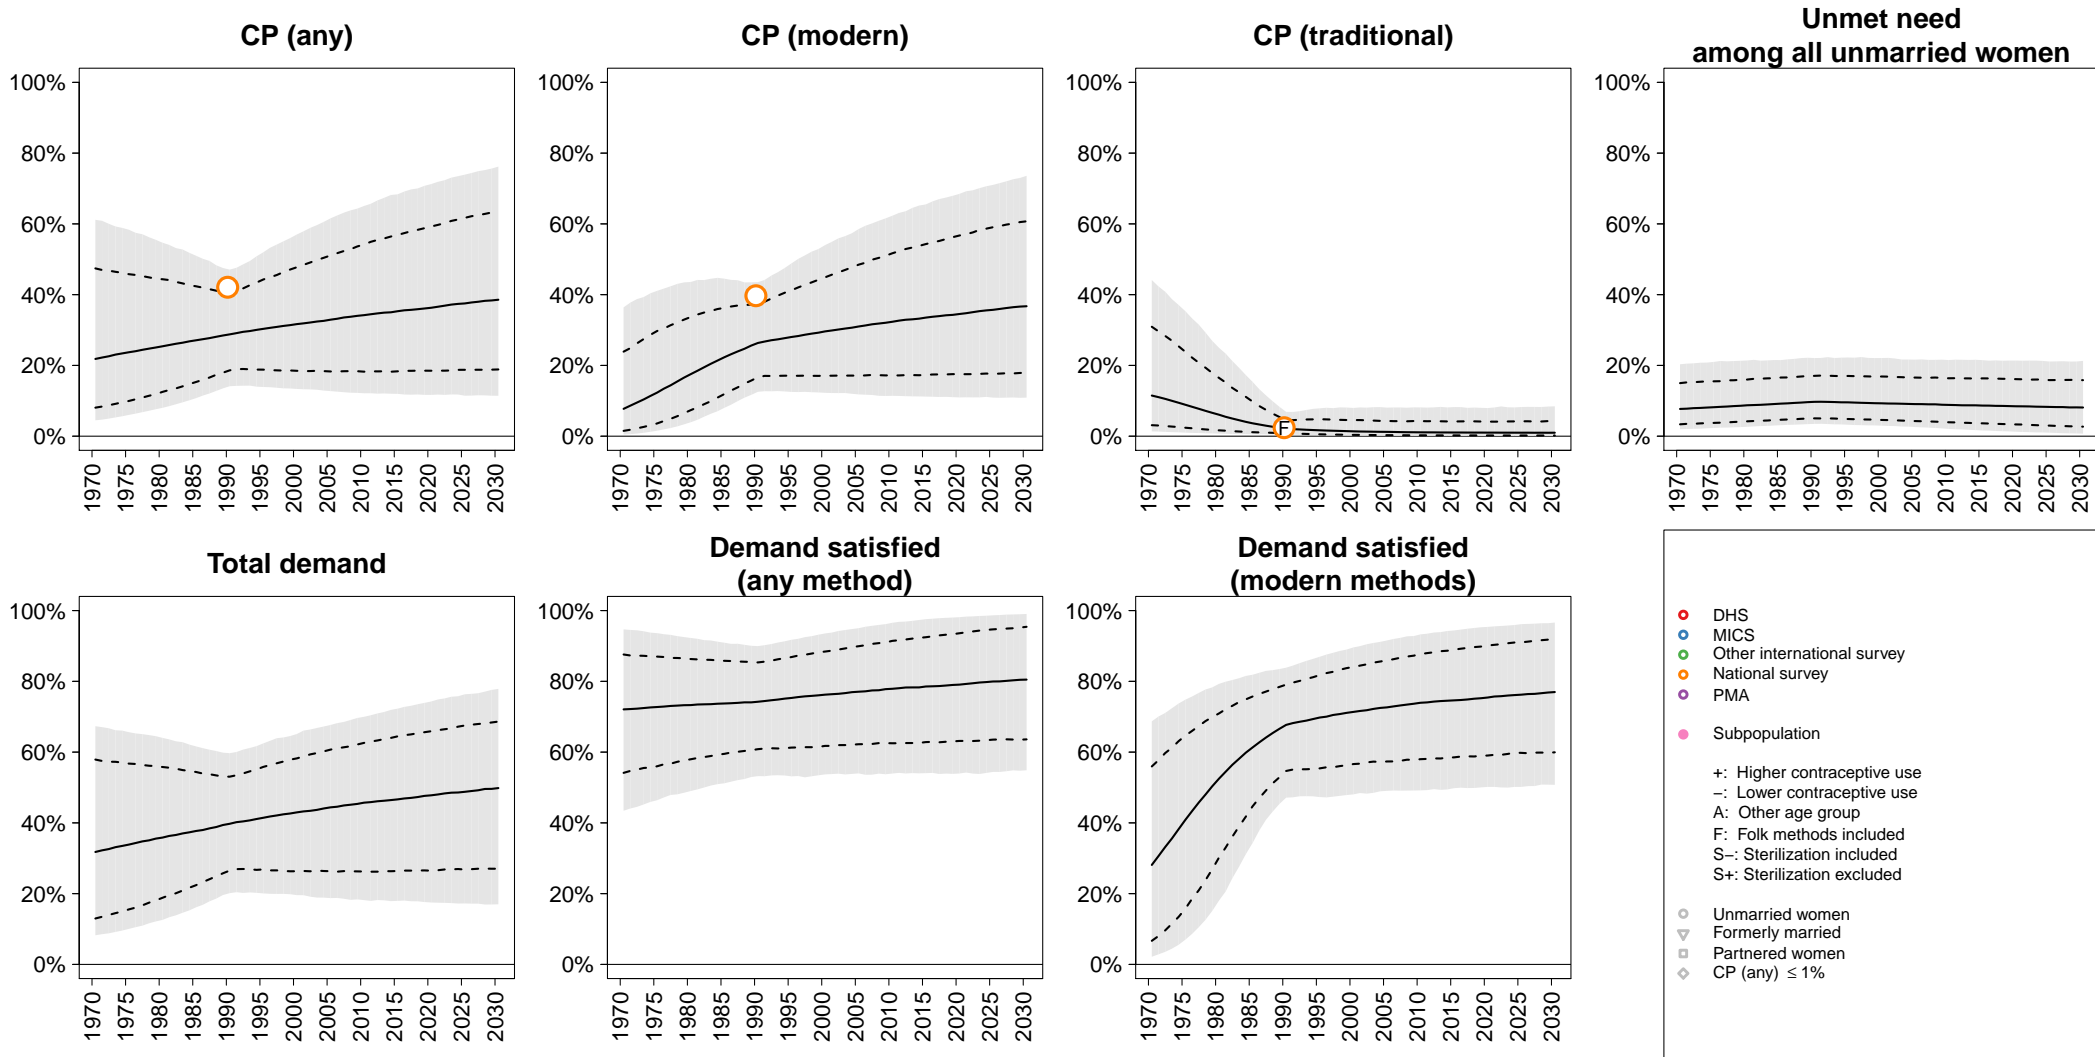

Romania (Eastern Europe, SA Group 1) --- Unmarried / Not In-Union

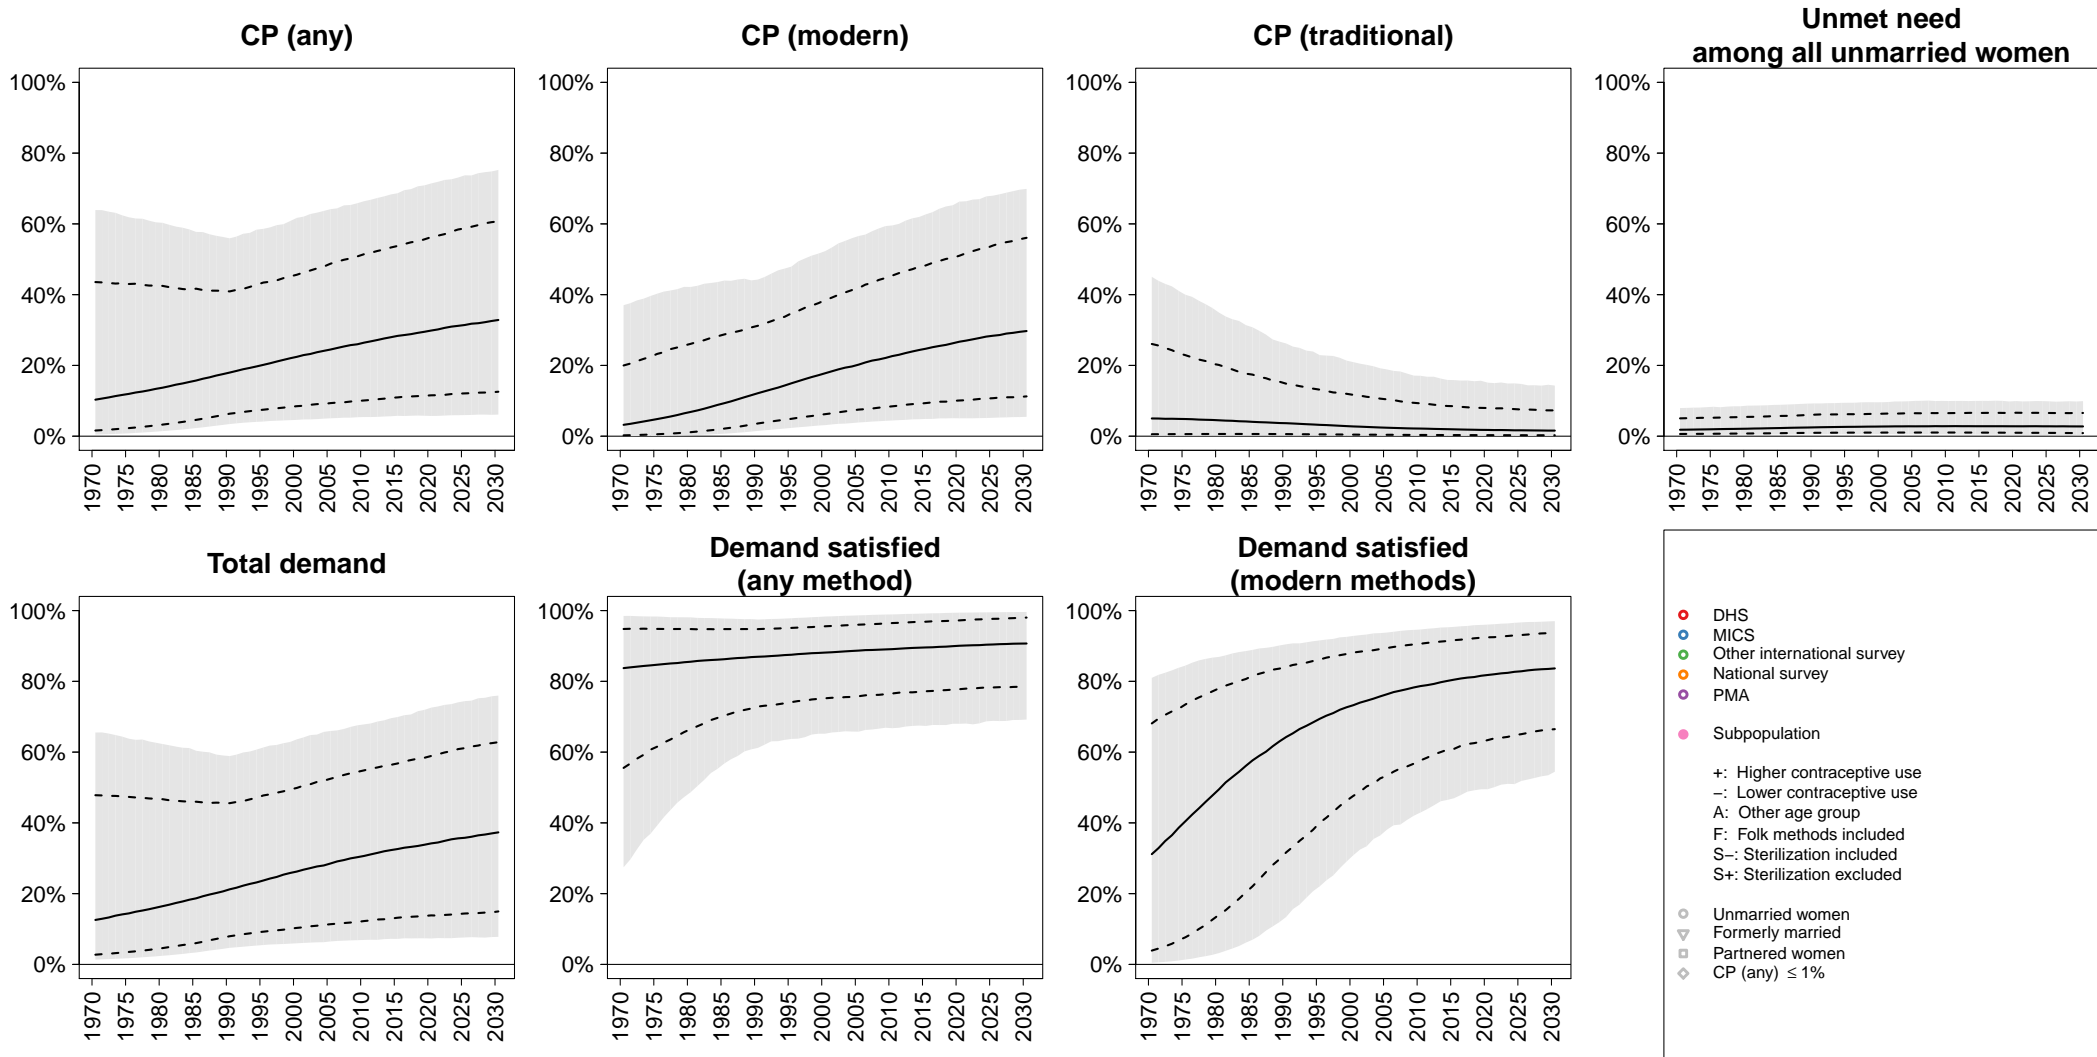

Russian Federation (Eastern Europe, SA Group 1) --- Unmarried / Not In-Union

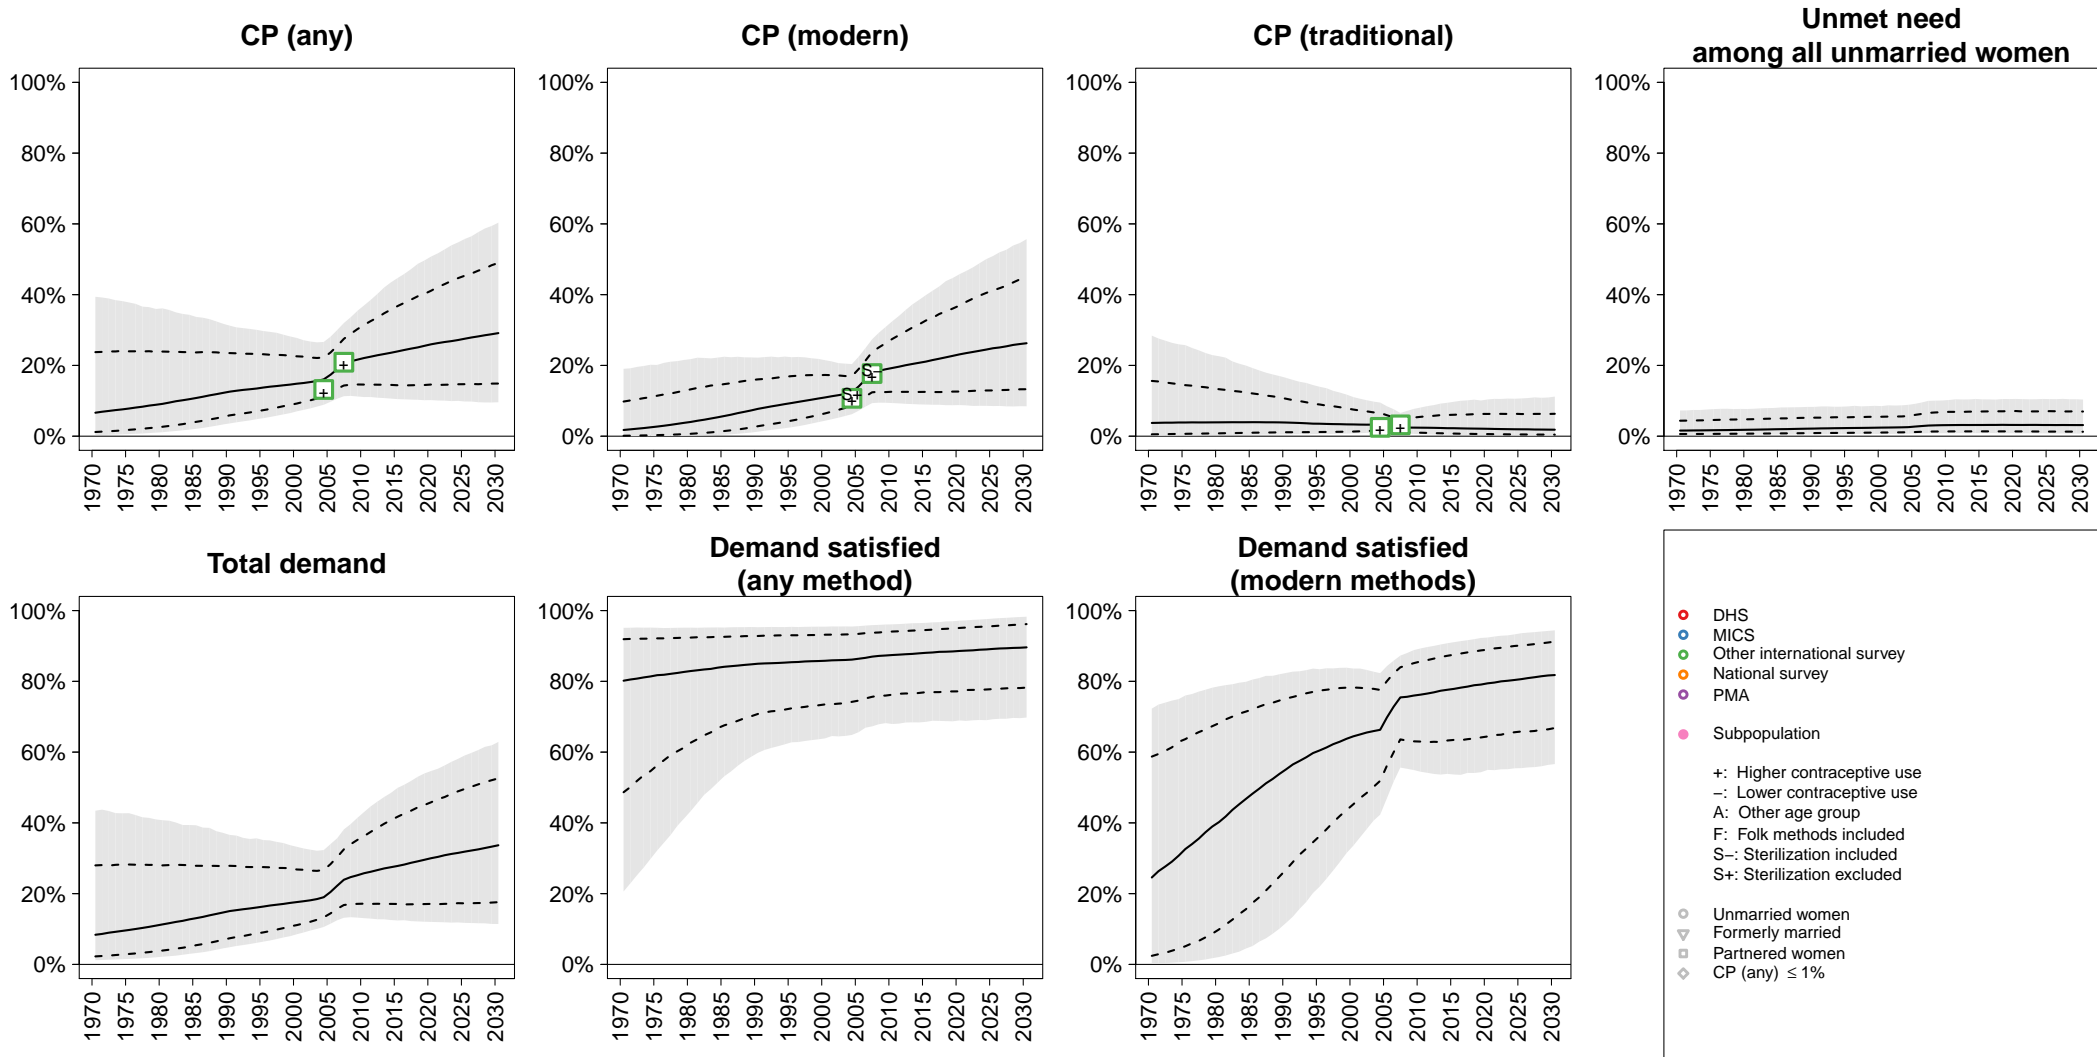

Rwanda (Eastern Africa, SA Group 1) --- Unmarried / Not In-Union

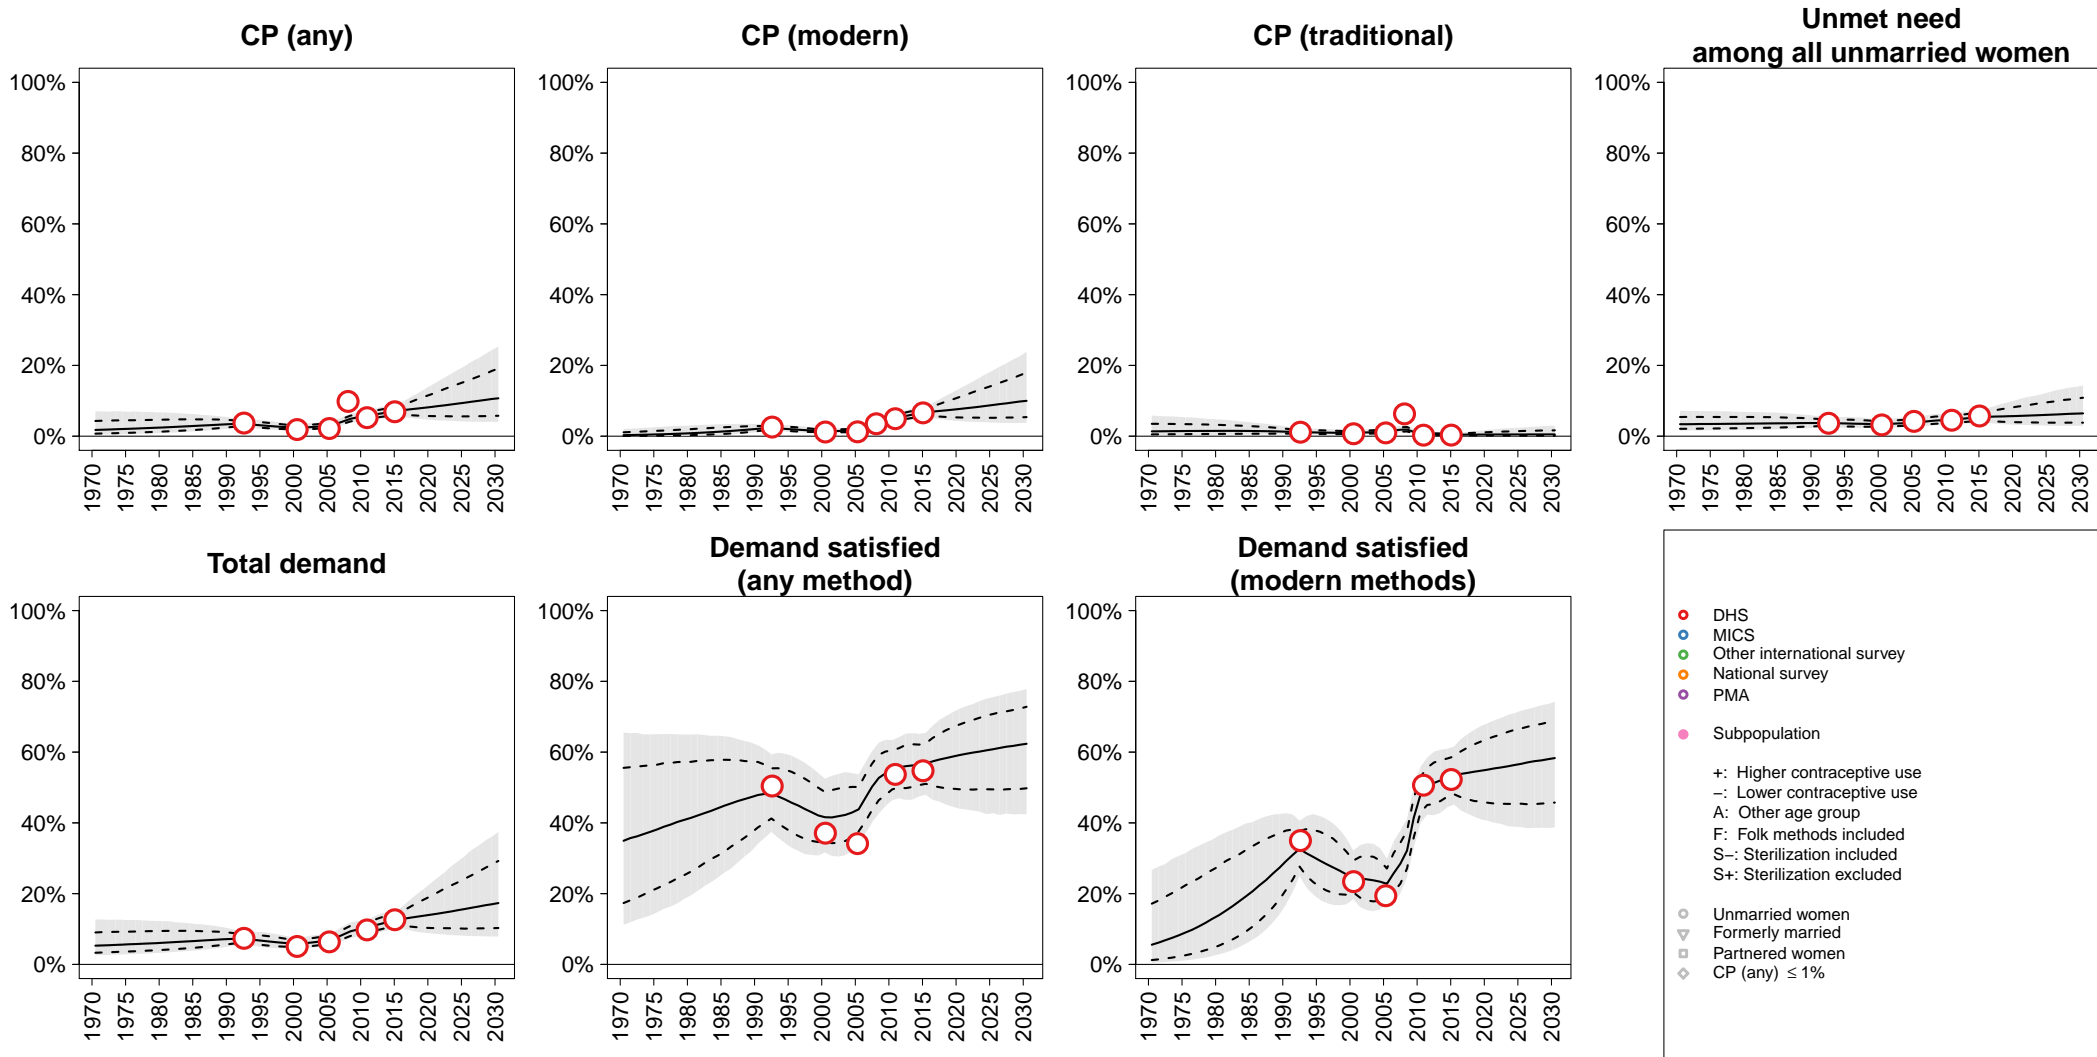

Samoa (Polynesia, SA Group 1) --- Unmarried / Not In-Union

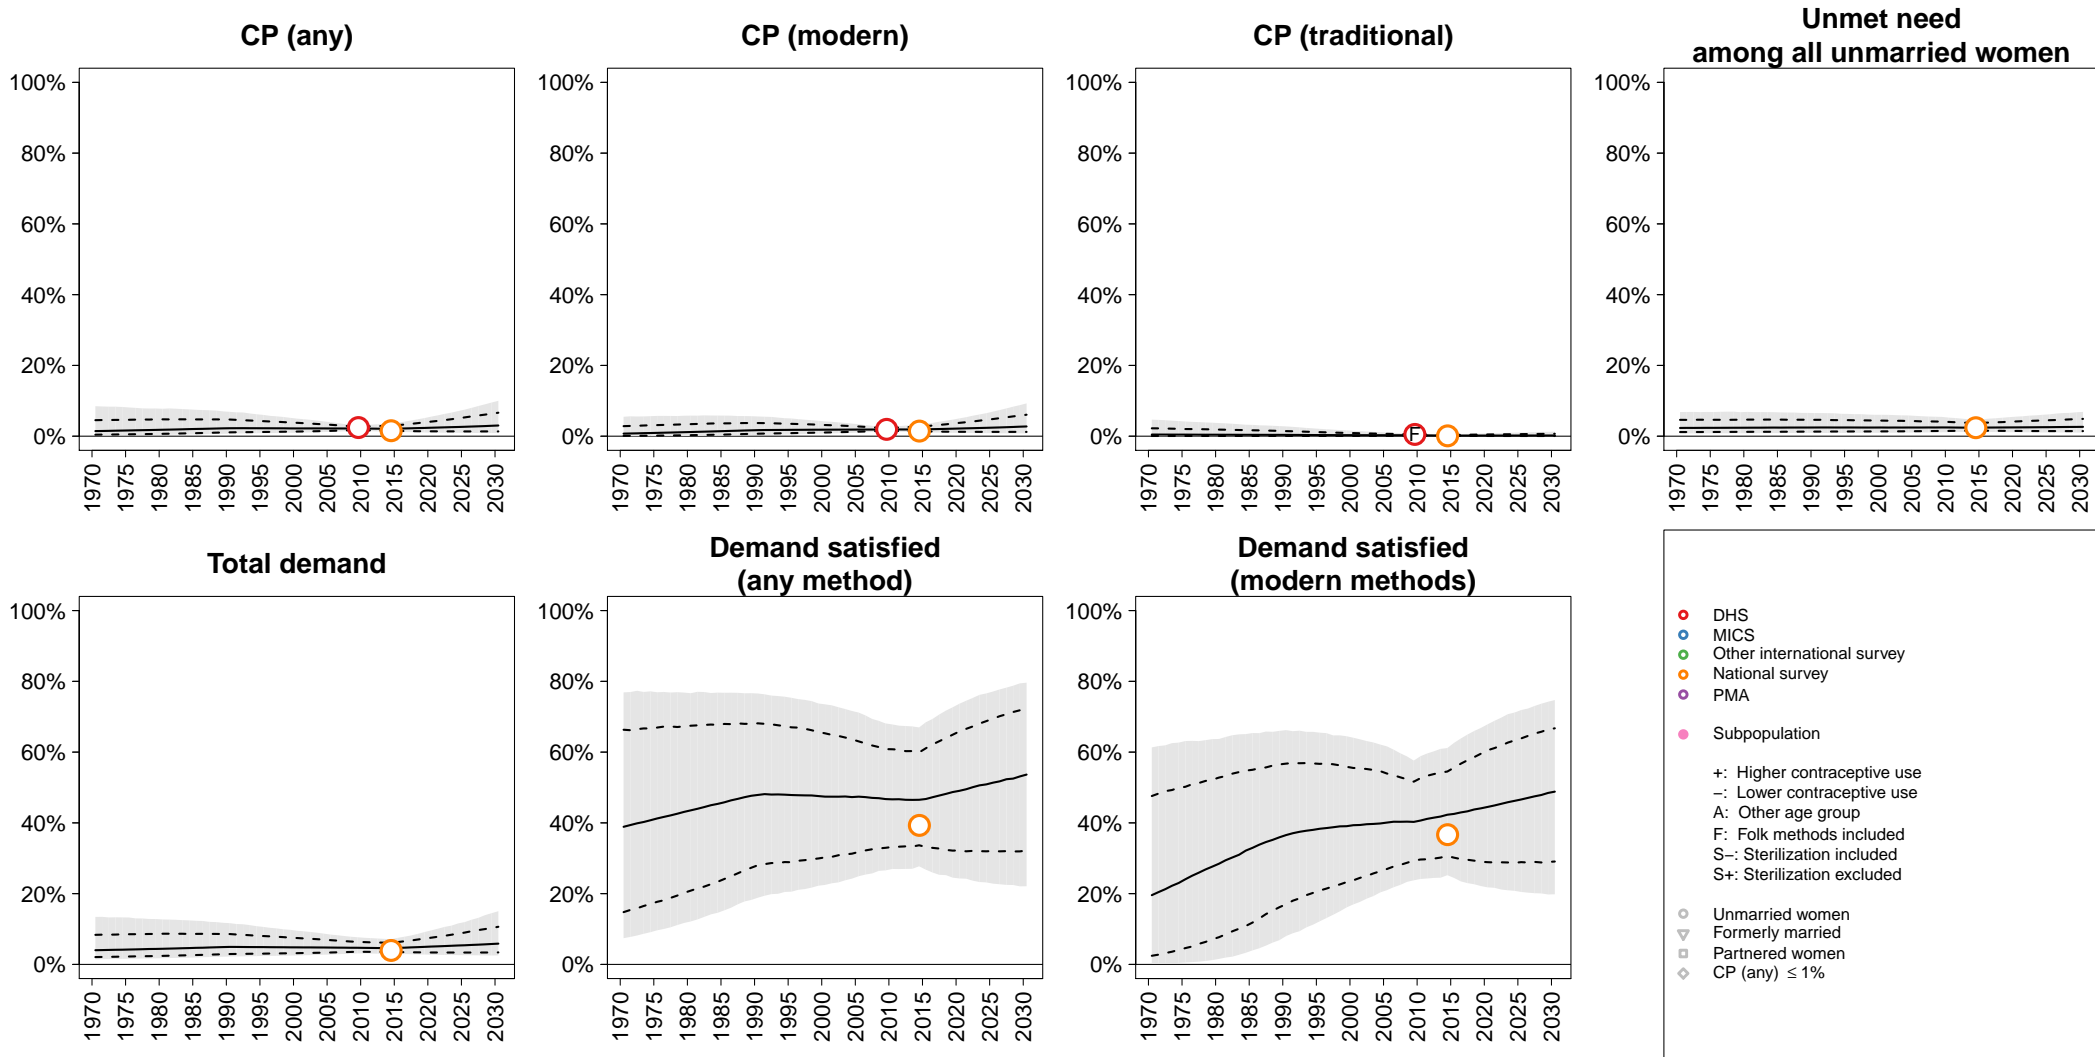

Sao Tome and Principe (Middle Africa, SA Group 1) --- Unmarried / Not In-Union

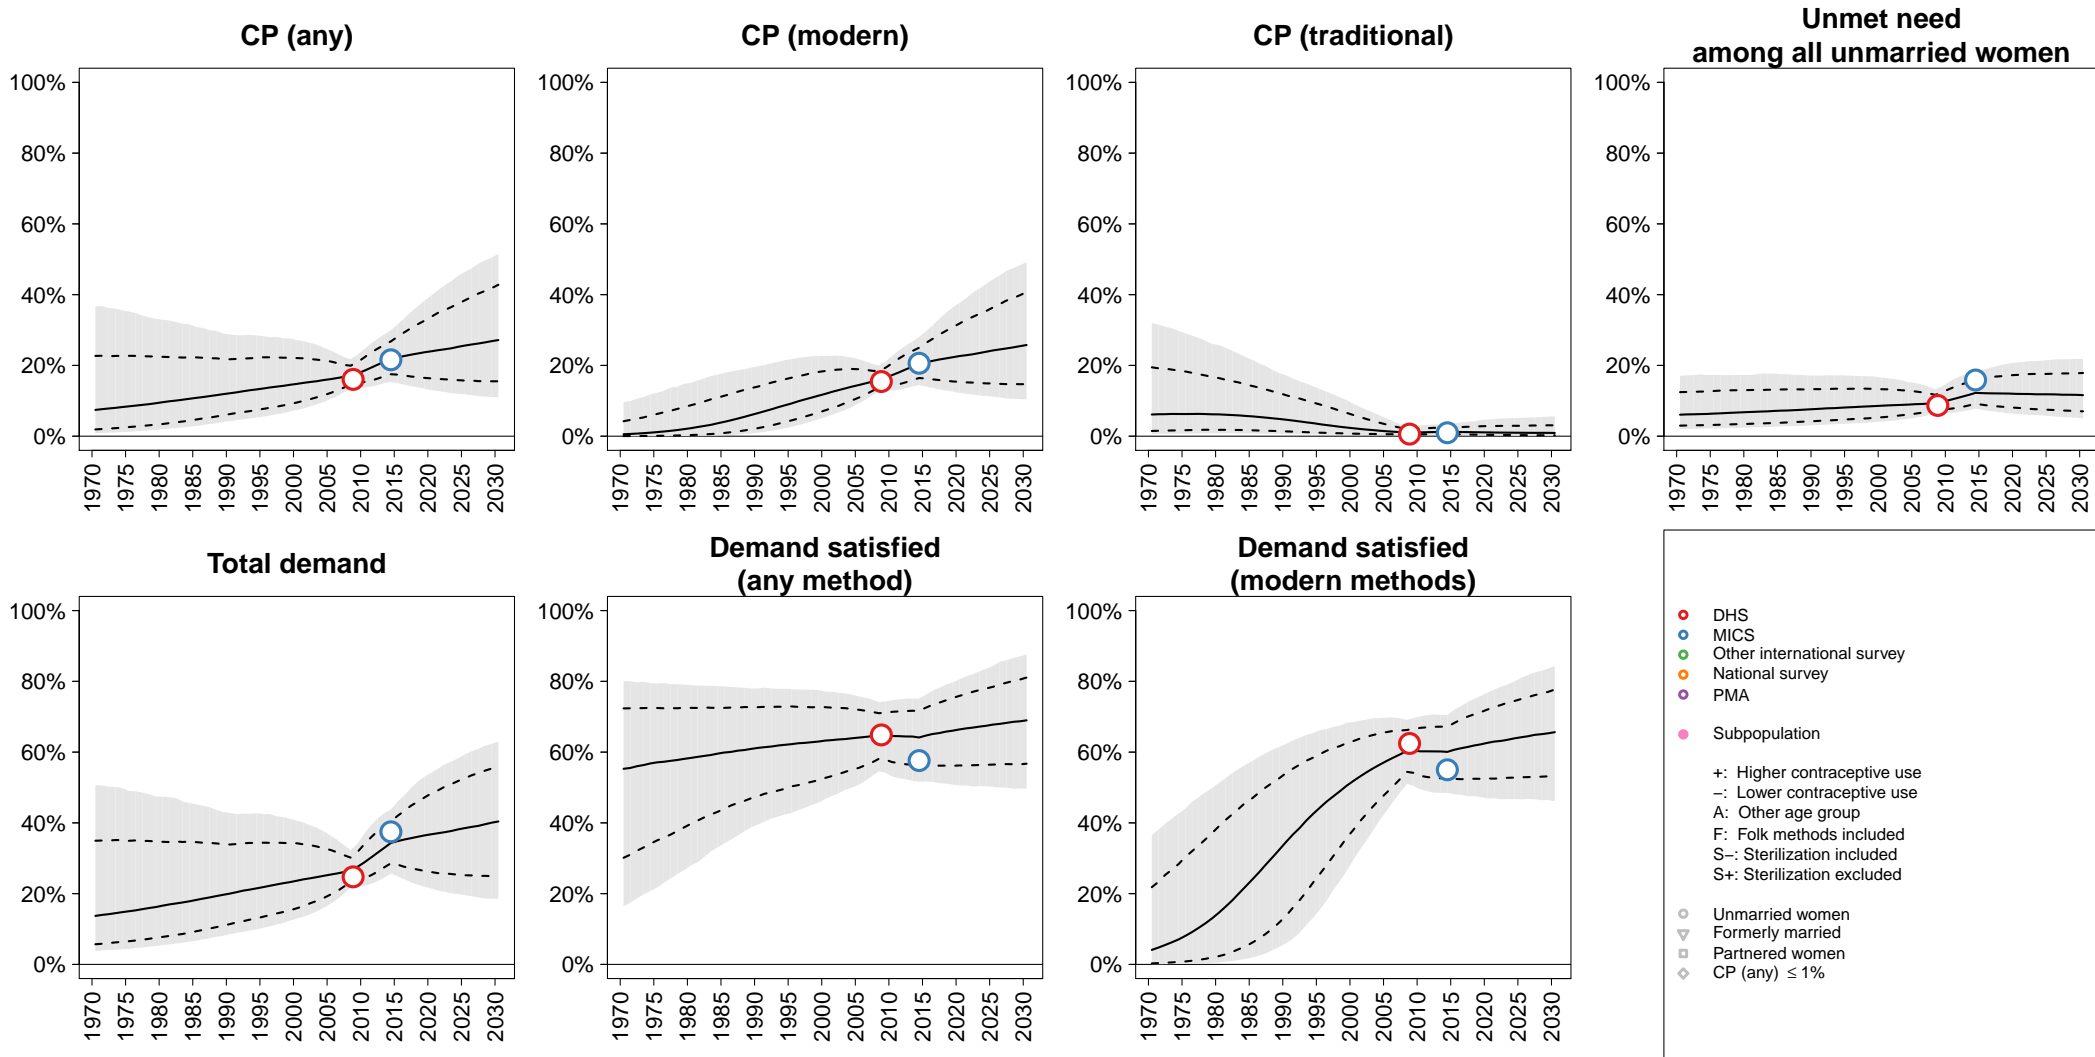



Saudi Arabia (Western Asia, SA Group 0) --- Unmarried / Not In-Union

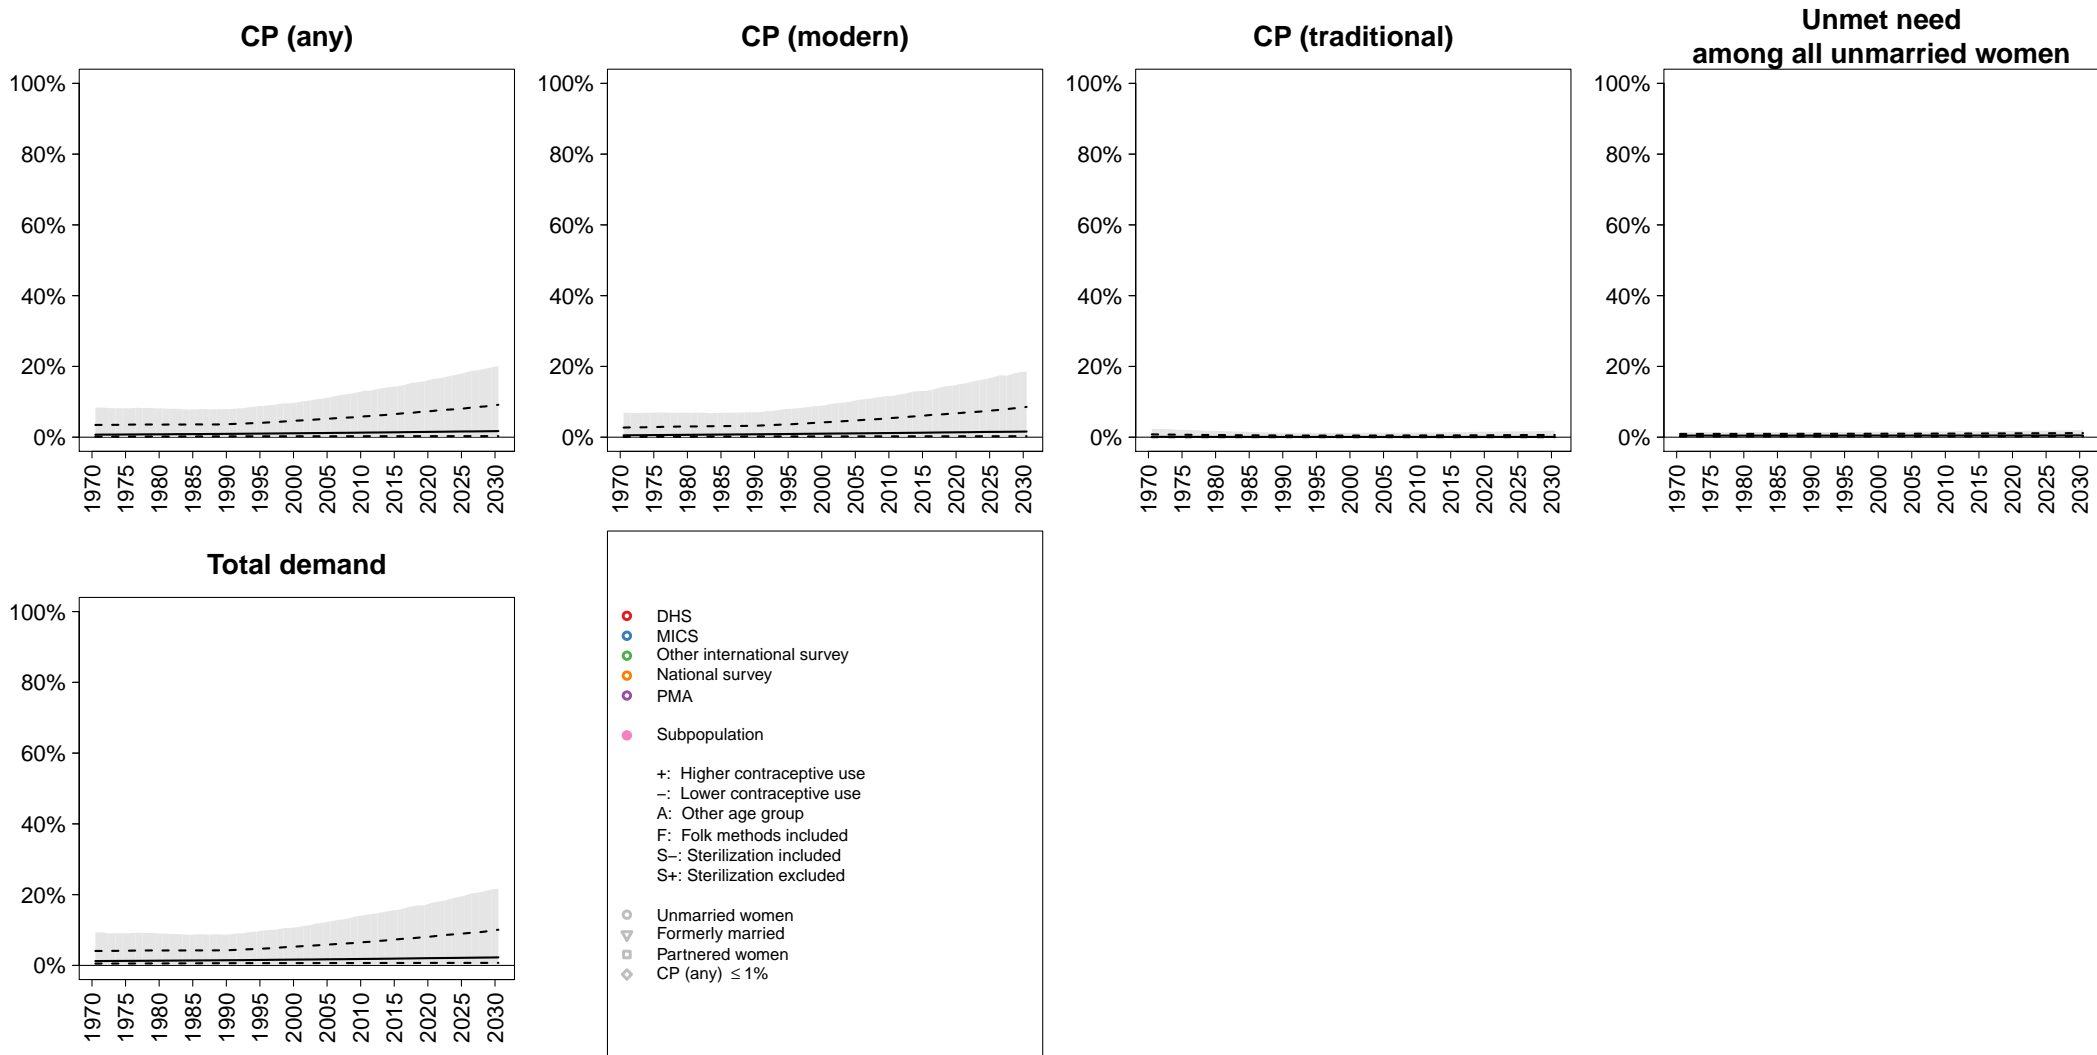

Senegal (Western Africa, SA Group 1) --- Unmarried / Not In-Union

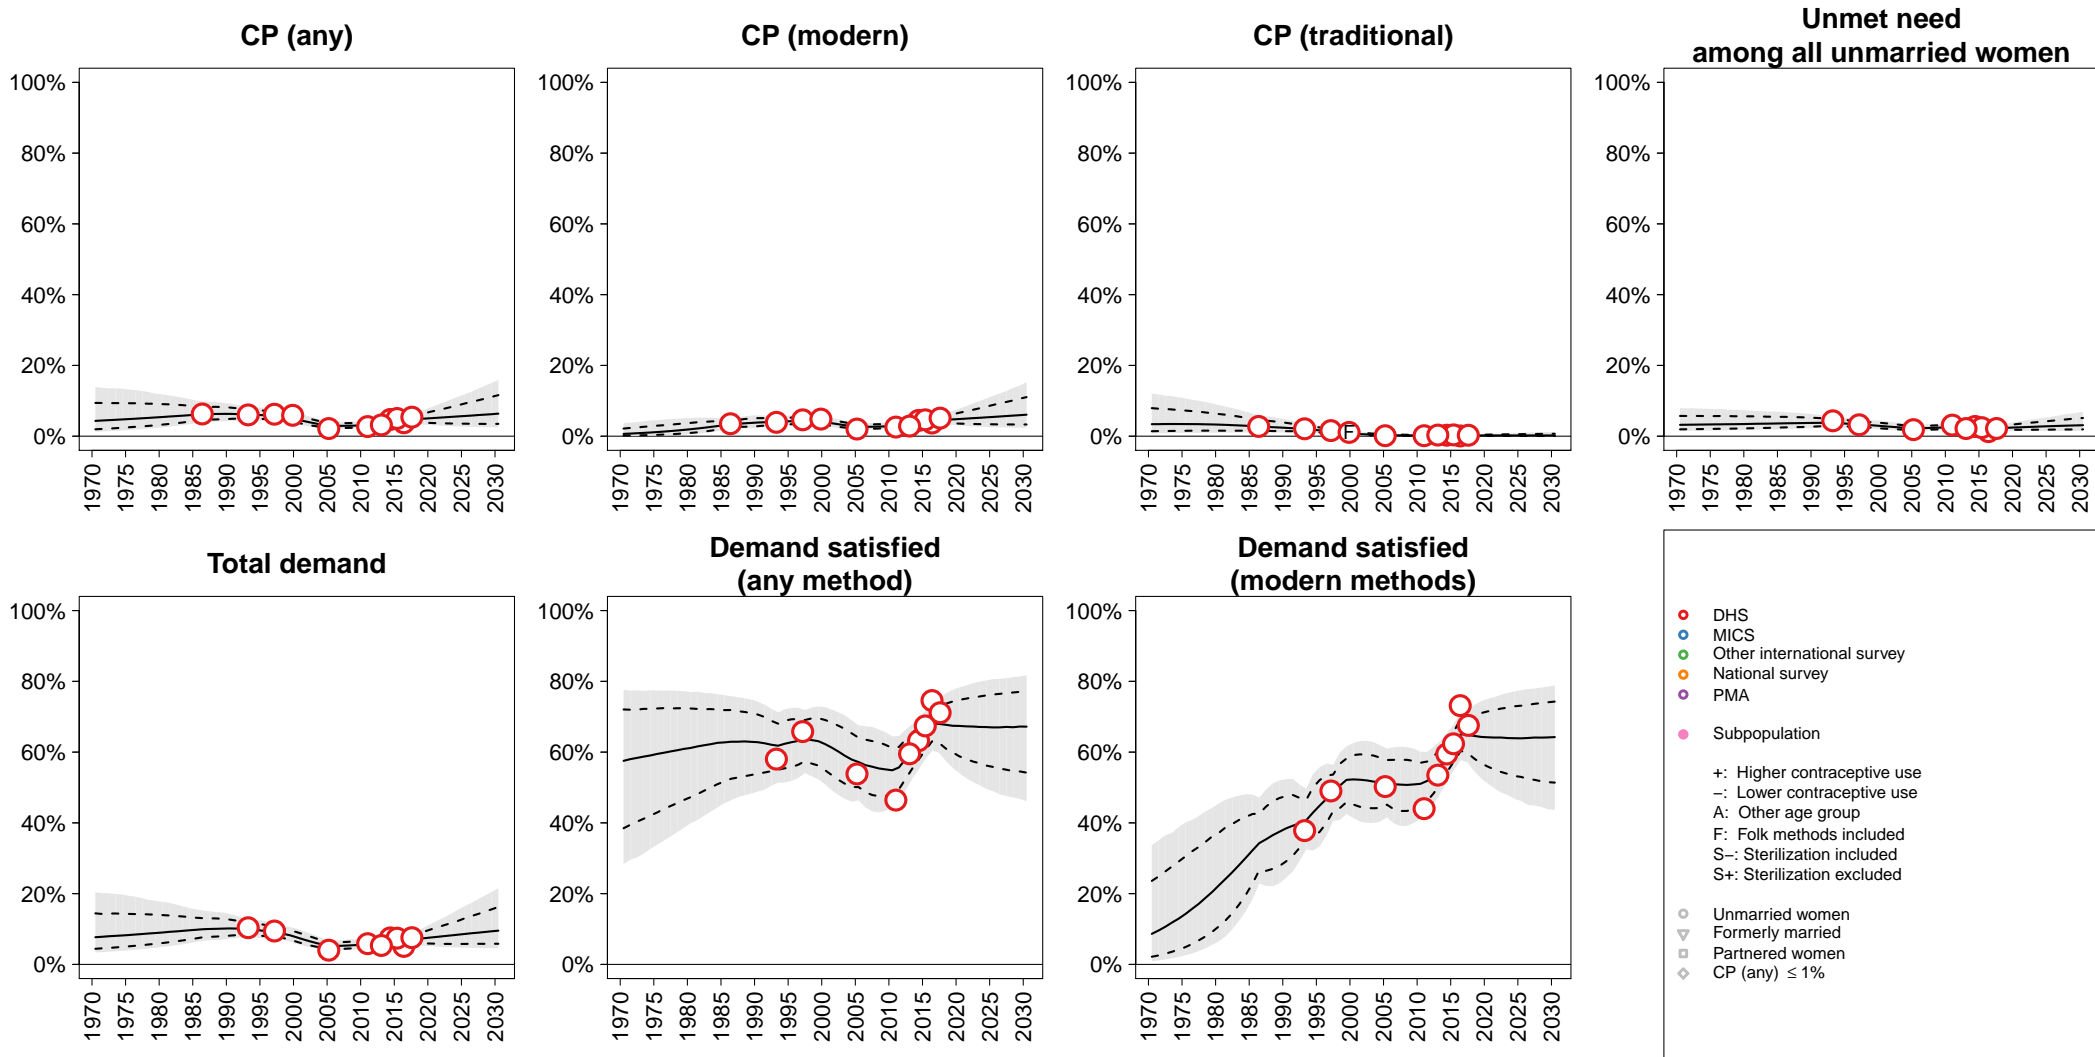

Serbia (Southern Europe, SA Group 1) --- Unmarried / Not In-Union

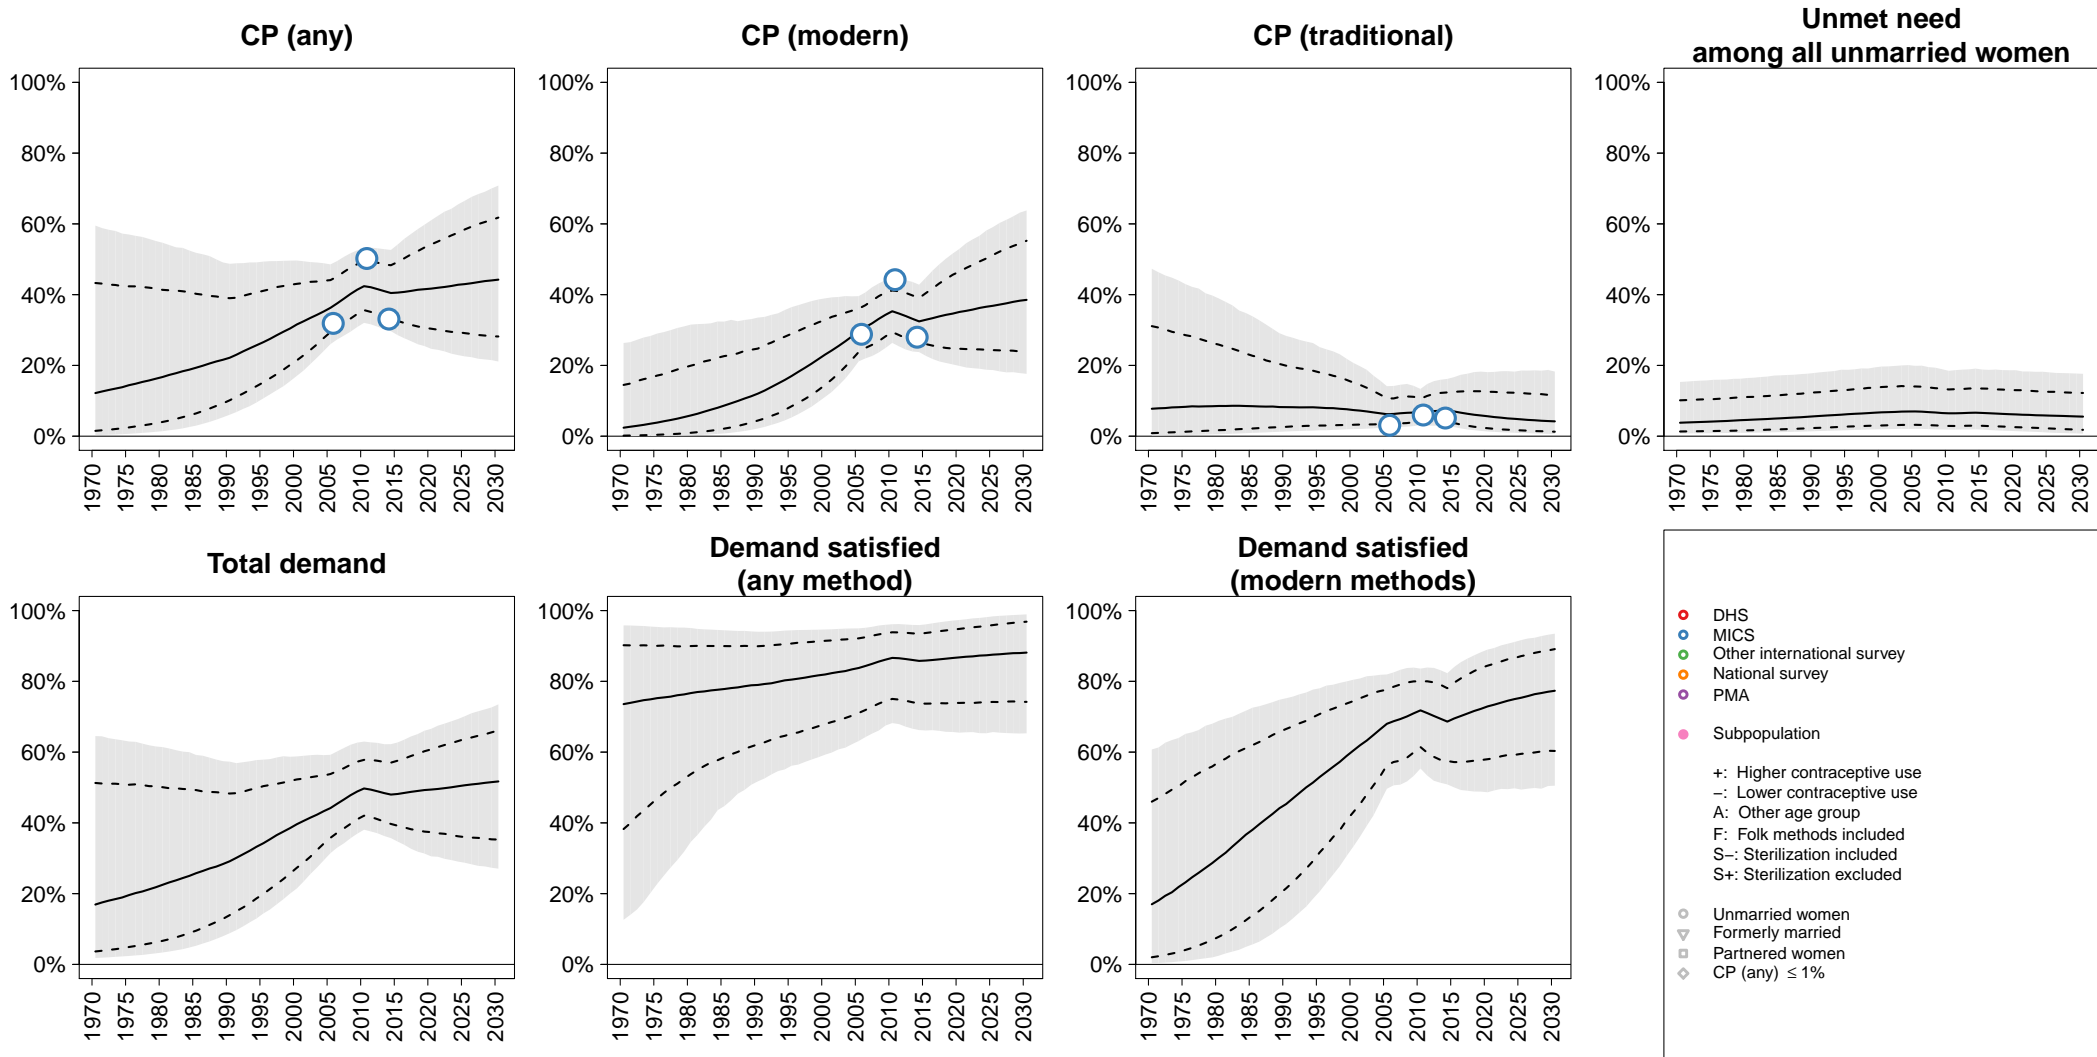

Sierra Leone (Western Africa, SA Group 1) --- Unmarried / Not In-Union

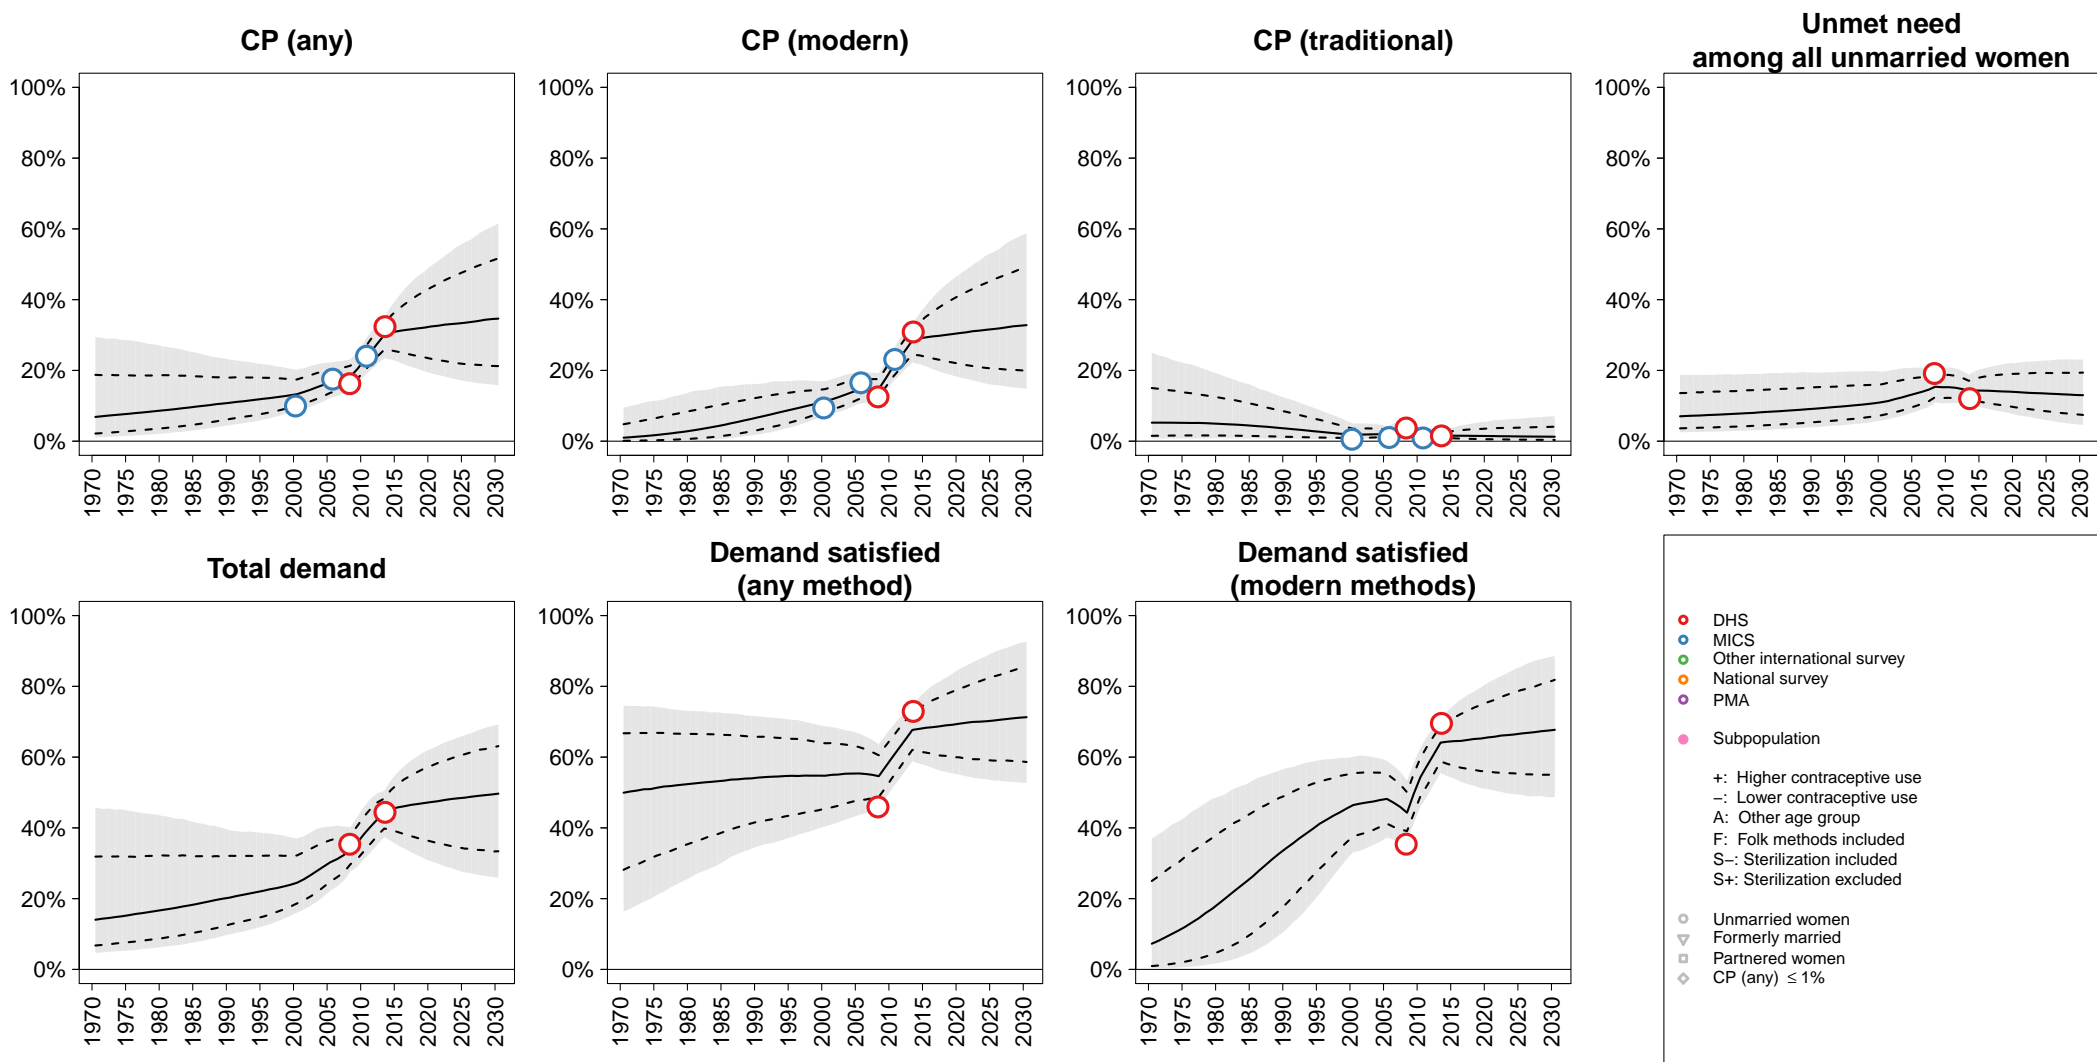

Singapore (South-eastern Asia, SA Group 1) --- Unmarried / Not In-Union

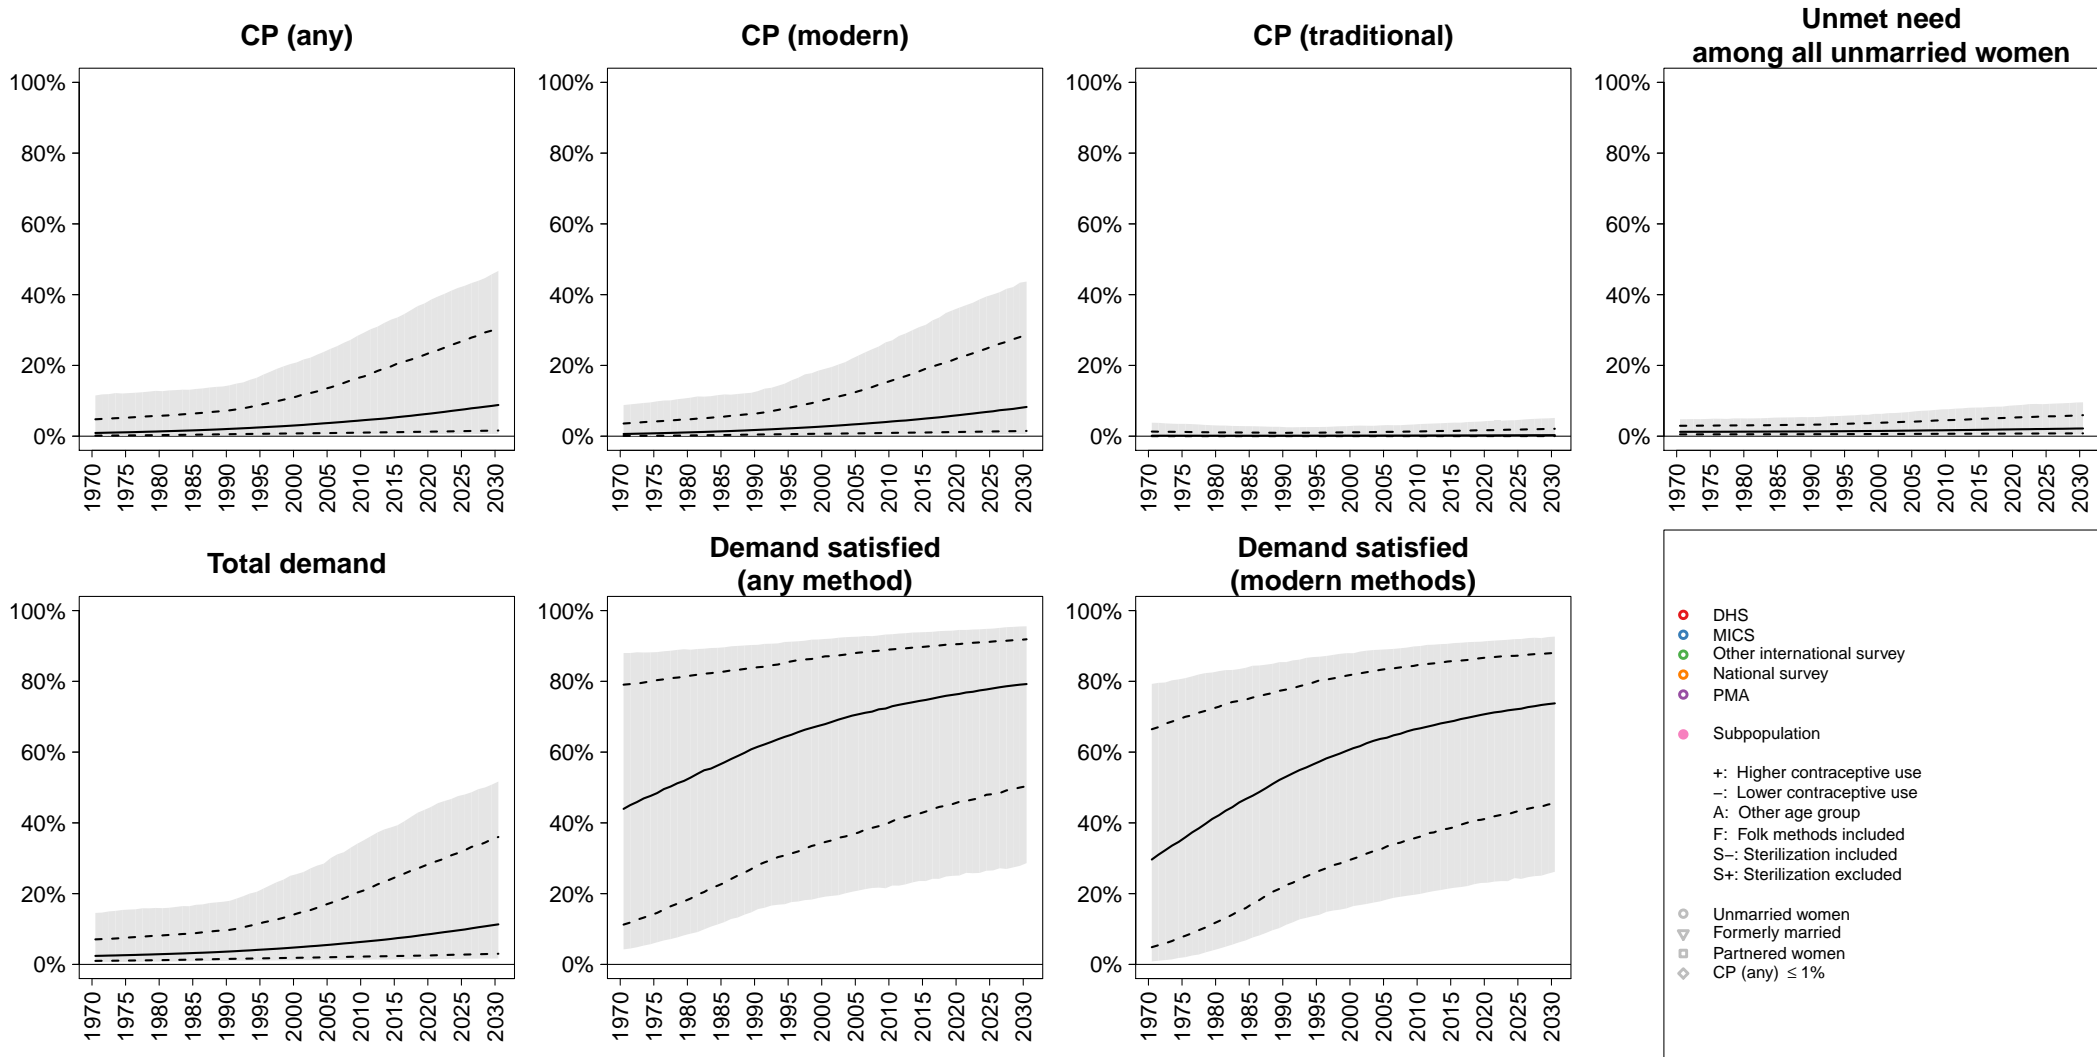

Slovakia (Eastern Europe, SA Group 1) --- Unmarried / Not In-Union

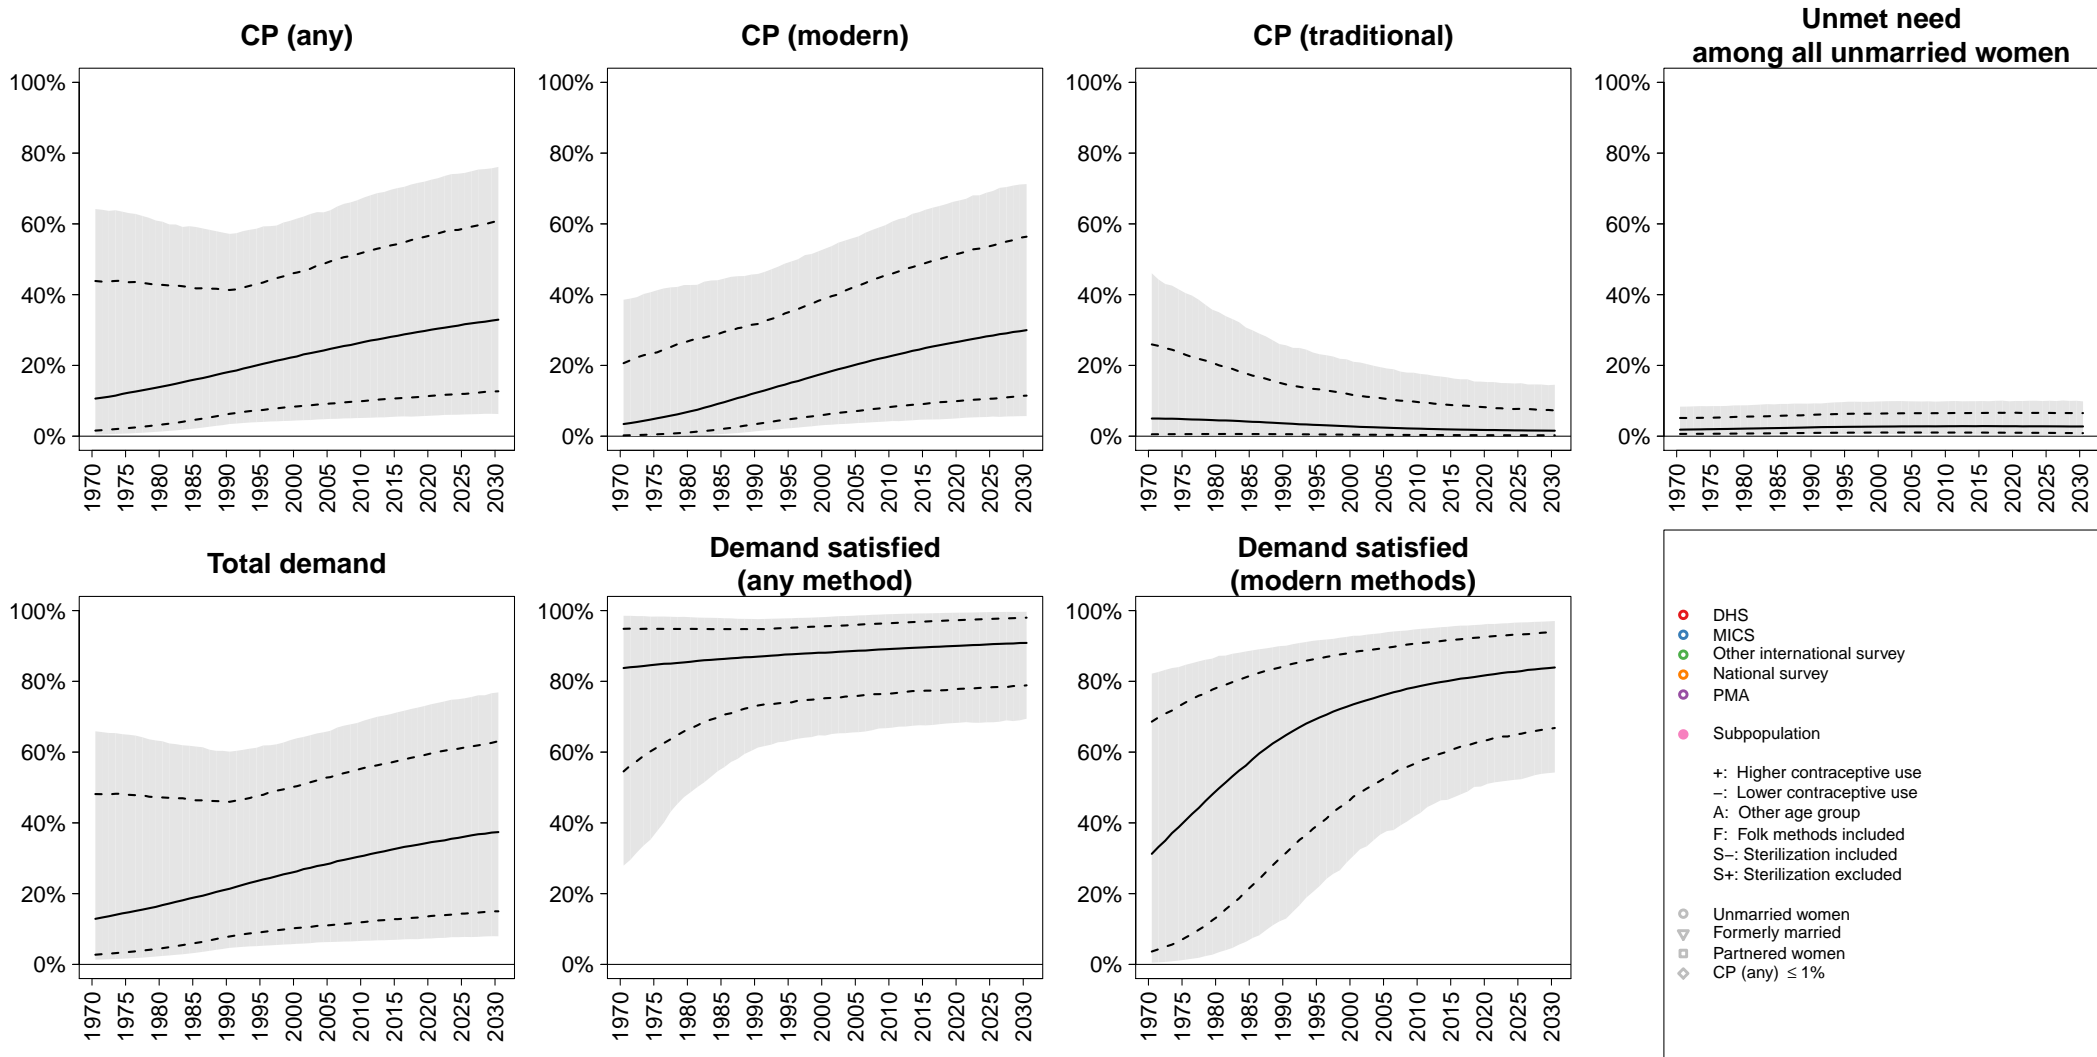

Slovenia (Southern Europe, SA Group 1) --- Unmarried / Not In-Union

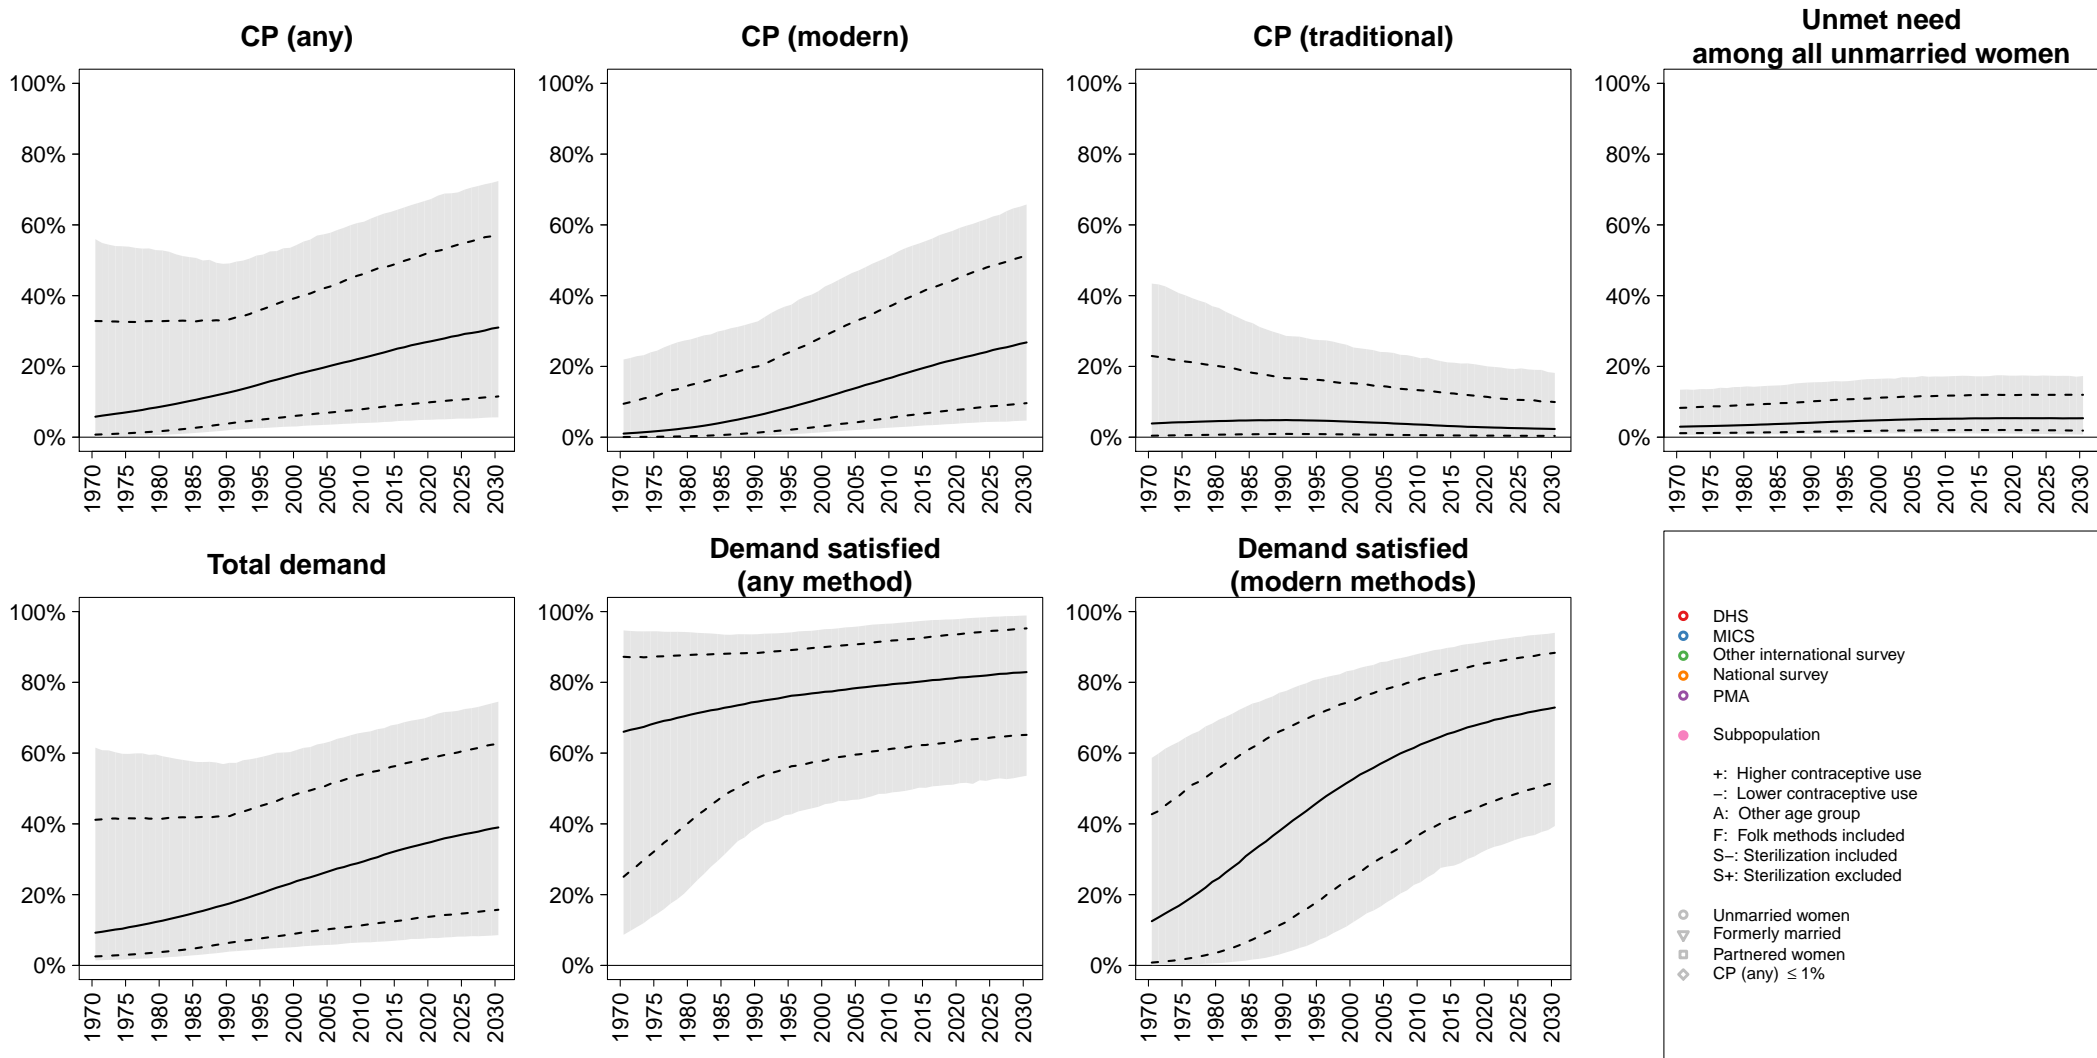

Solomon Islands (Melanesia, SA Group 1) --- Unmarried / Not In-Union

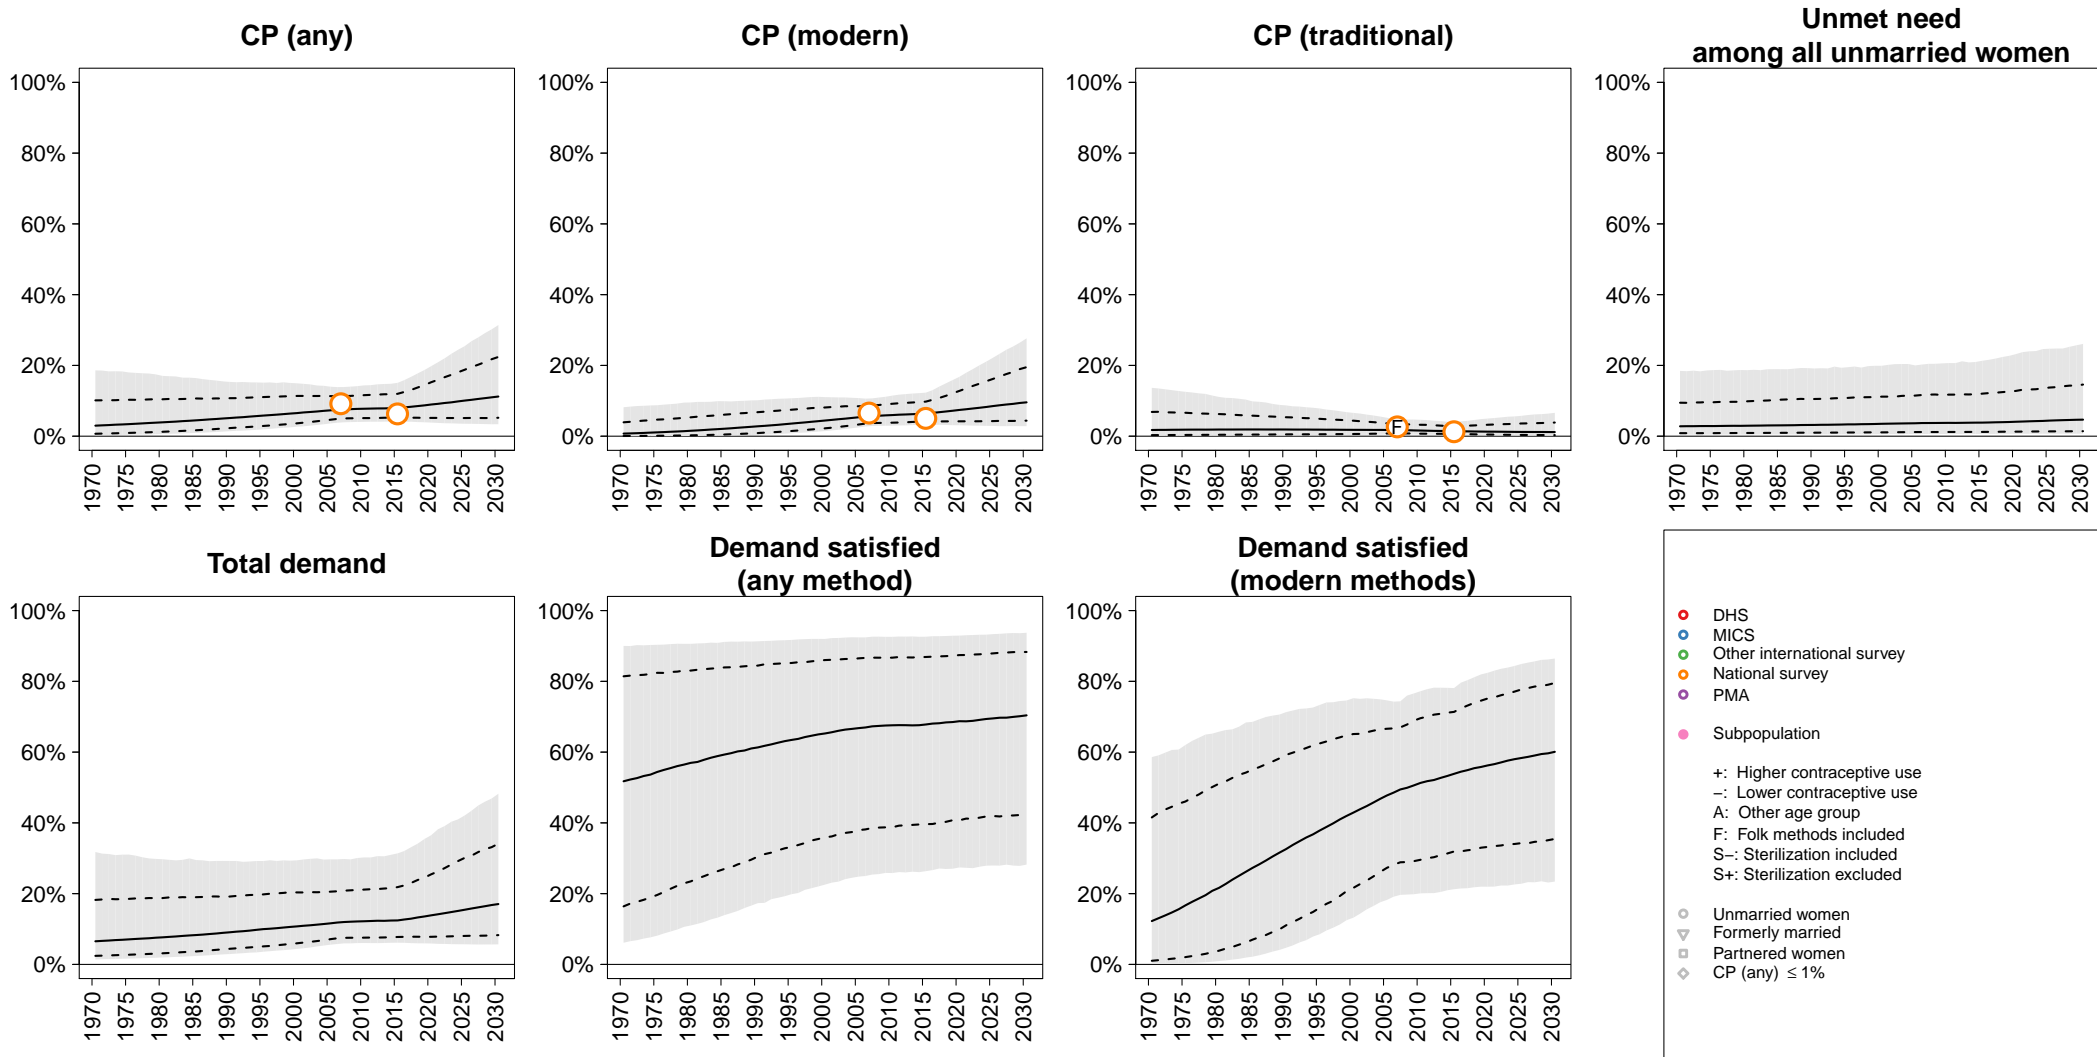



Somalia (Eastern Africa, SA Group 0) --- Unmarried / Not In-Union

CP (any)

CP (modern)

CP (traditional)

Unmet need among all unmarried women

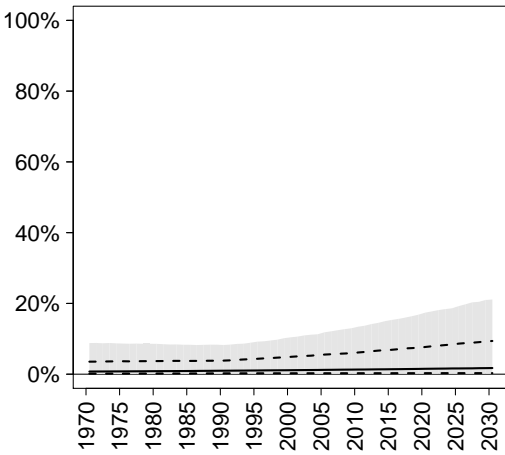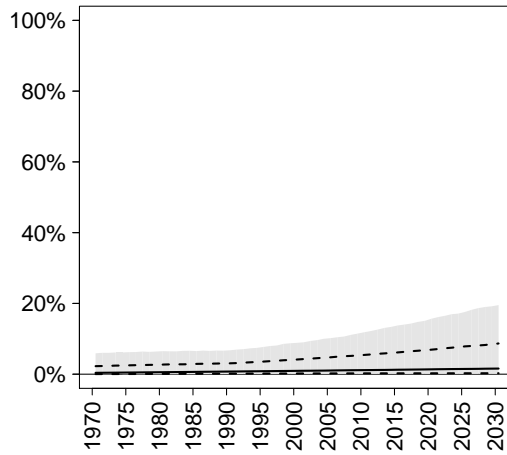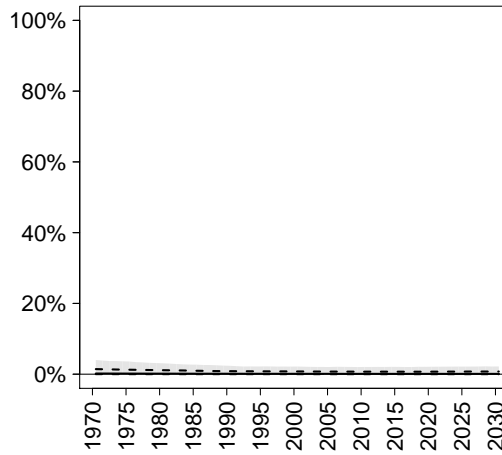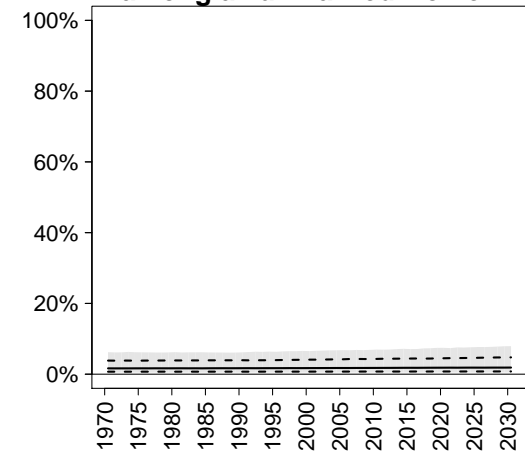

Total demand

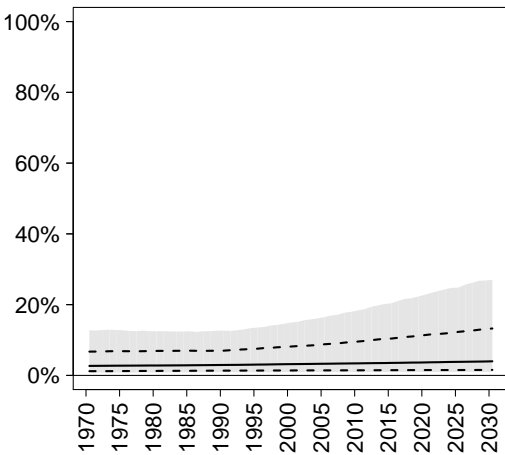

- DHS
- MICS
- Other international survey
- National survey
- PMA
- Subpopulation
- +: Higher contraceptive use
- : Lower contraceptive use
- A: Other age group
- F: Folk methods included
- S-: Sterilization included
- S+: Sterilization excluded
- Unmarried women
- ▽ Formerly married
- ◻ Partnered women
- ◇ CP (any) ≤ 1%

South Africa (Southern Africa, SA Group 1) --- Unmarried / Not In-Union

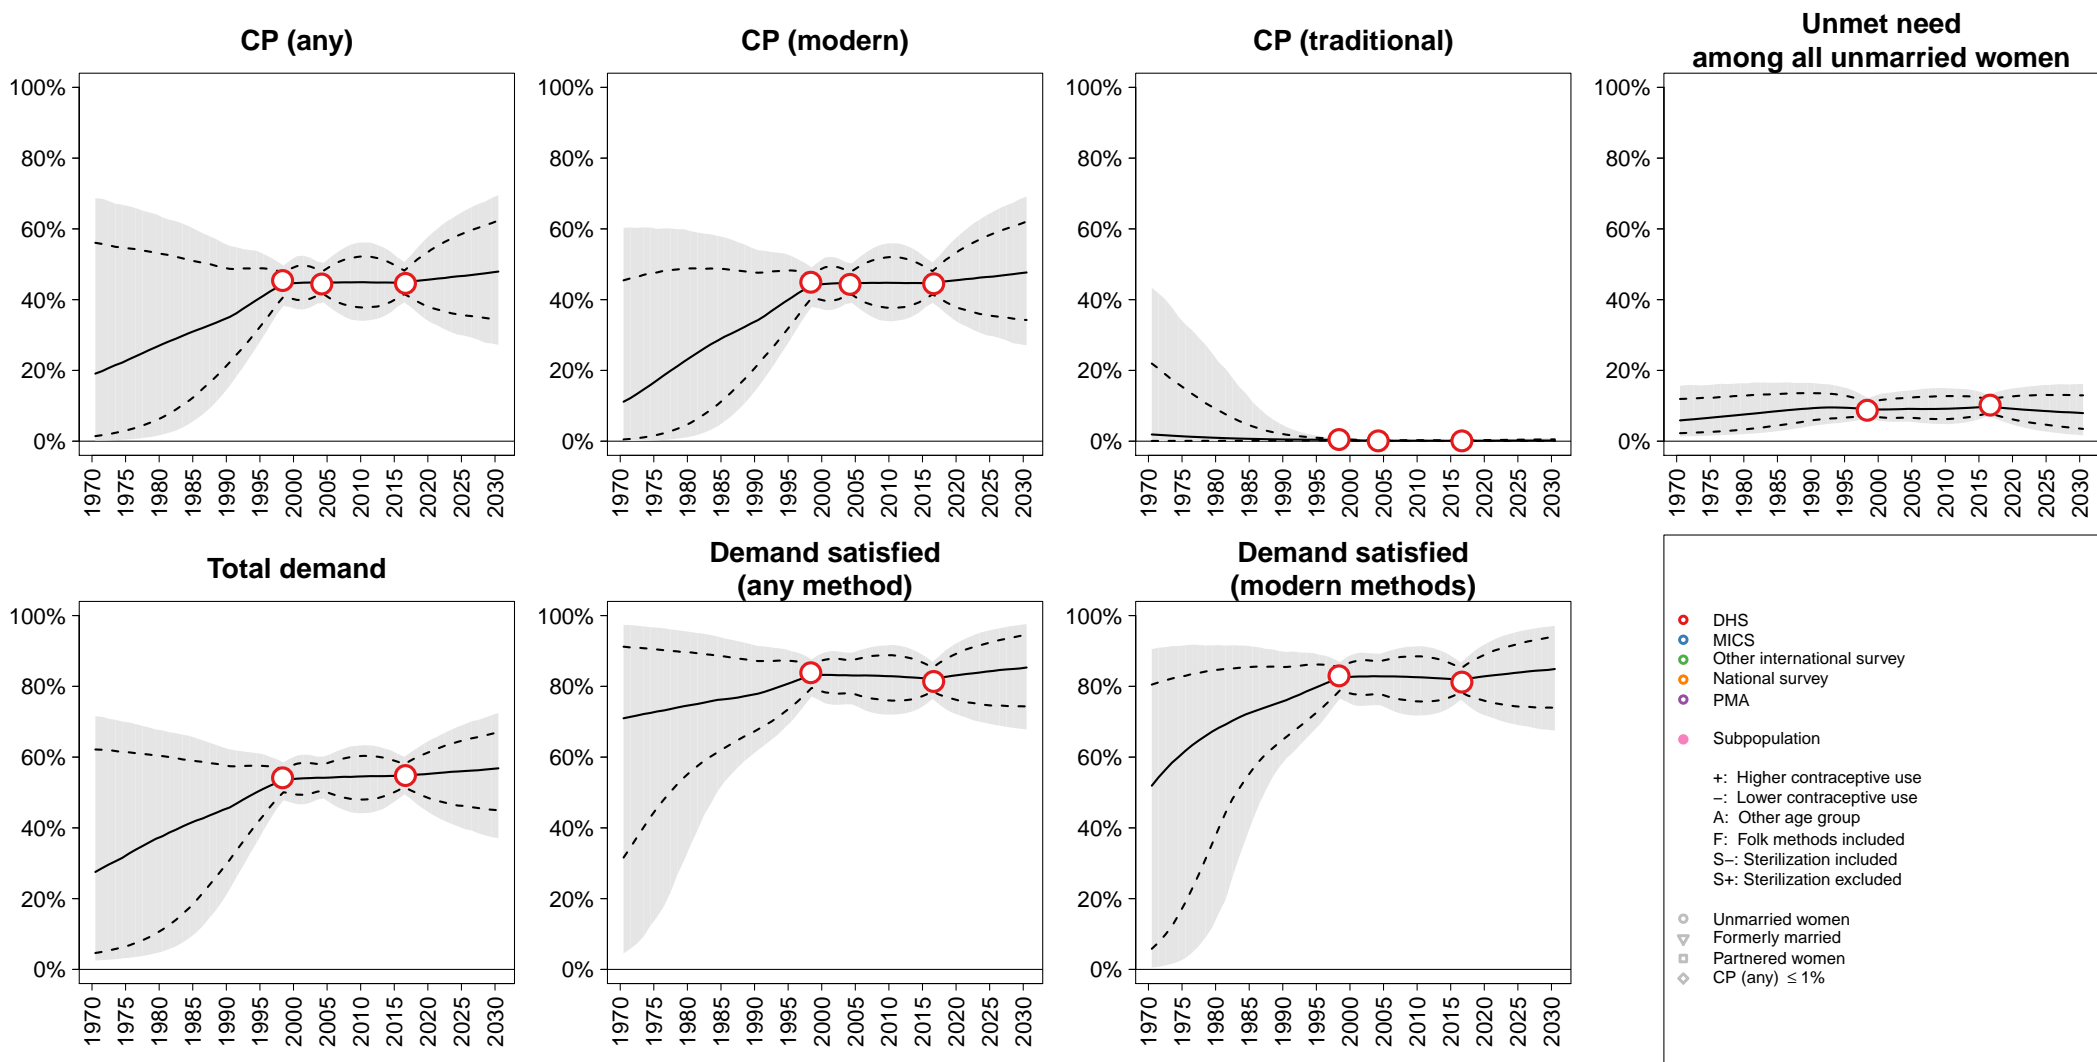

South Sudan (Eastern Africa, SA Group 0) --- Unmarried / Not In-Union

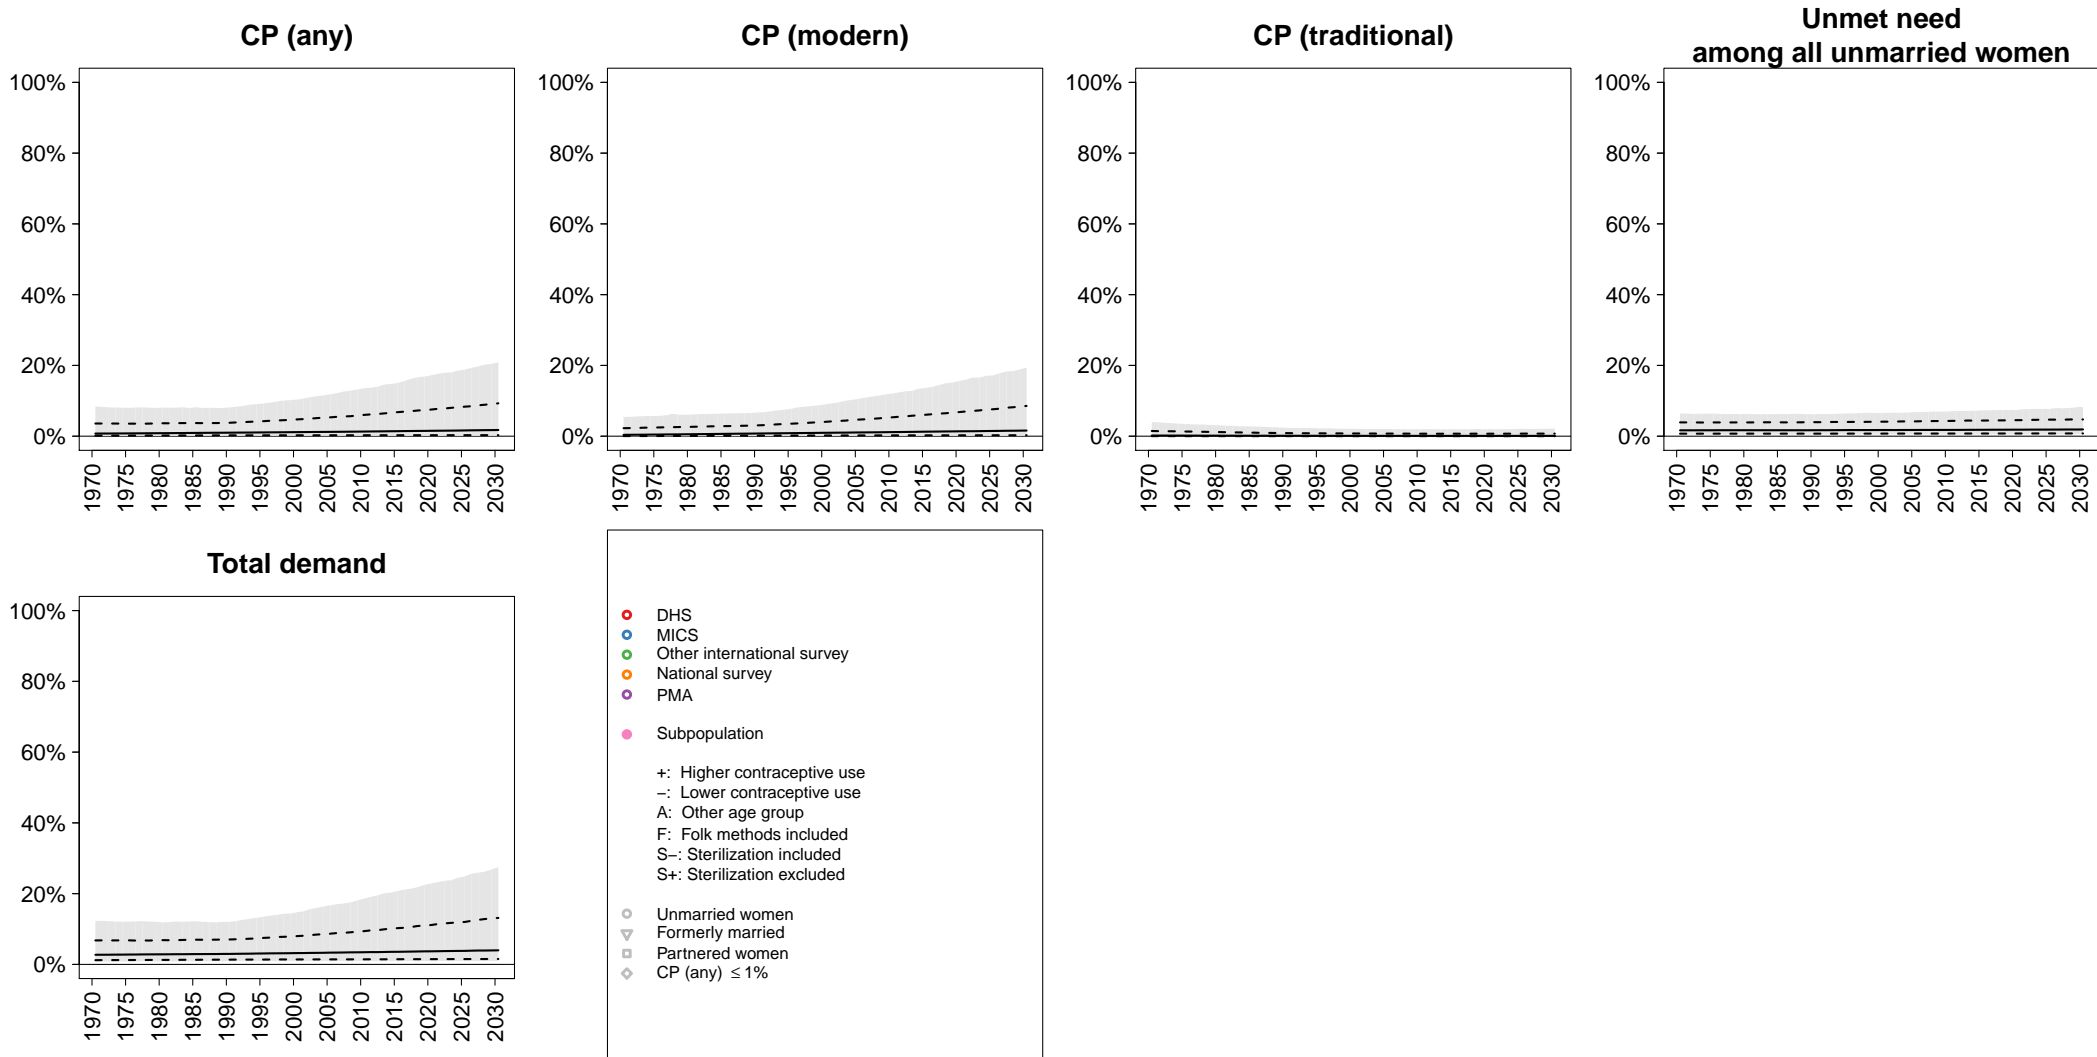

Spain (Southern Europe, SA Group 1) --- Unmarried / Not In-Union

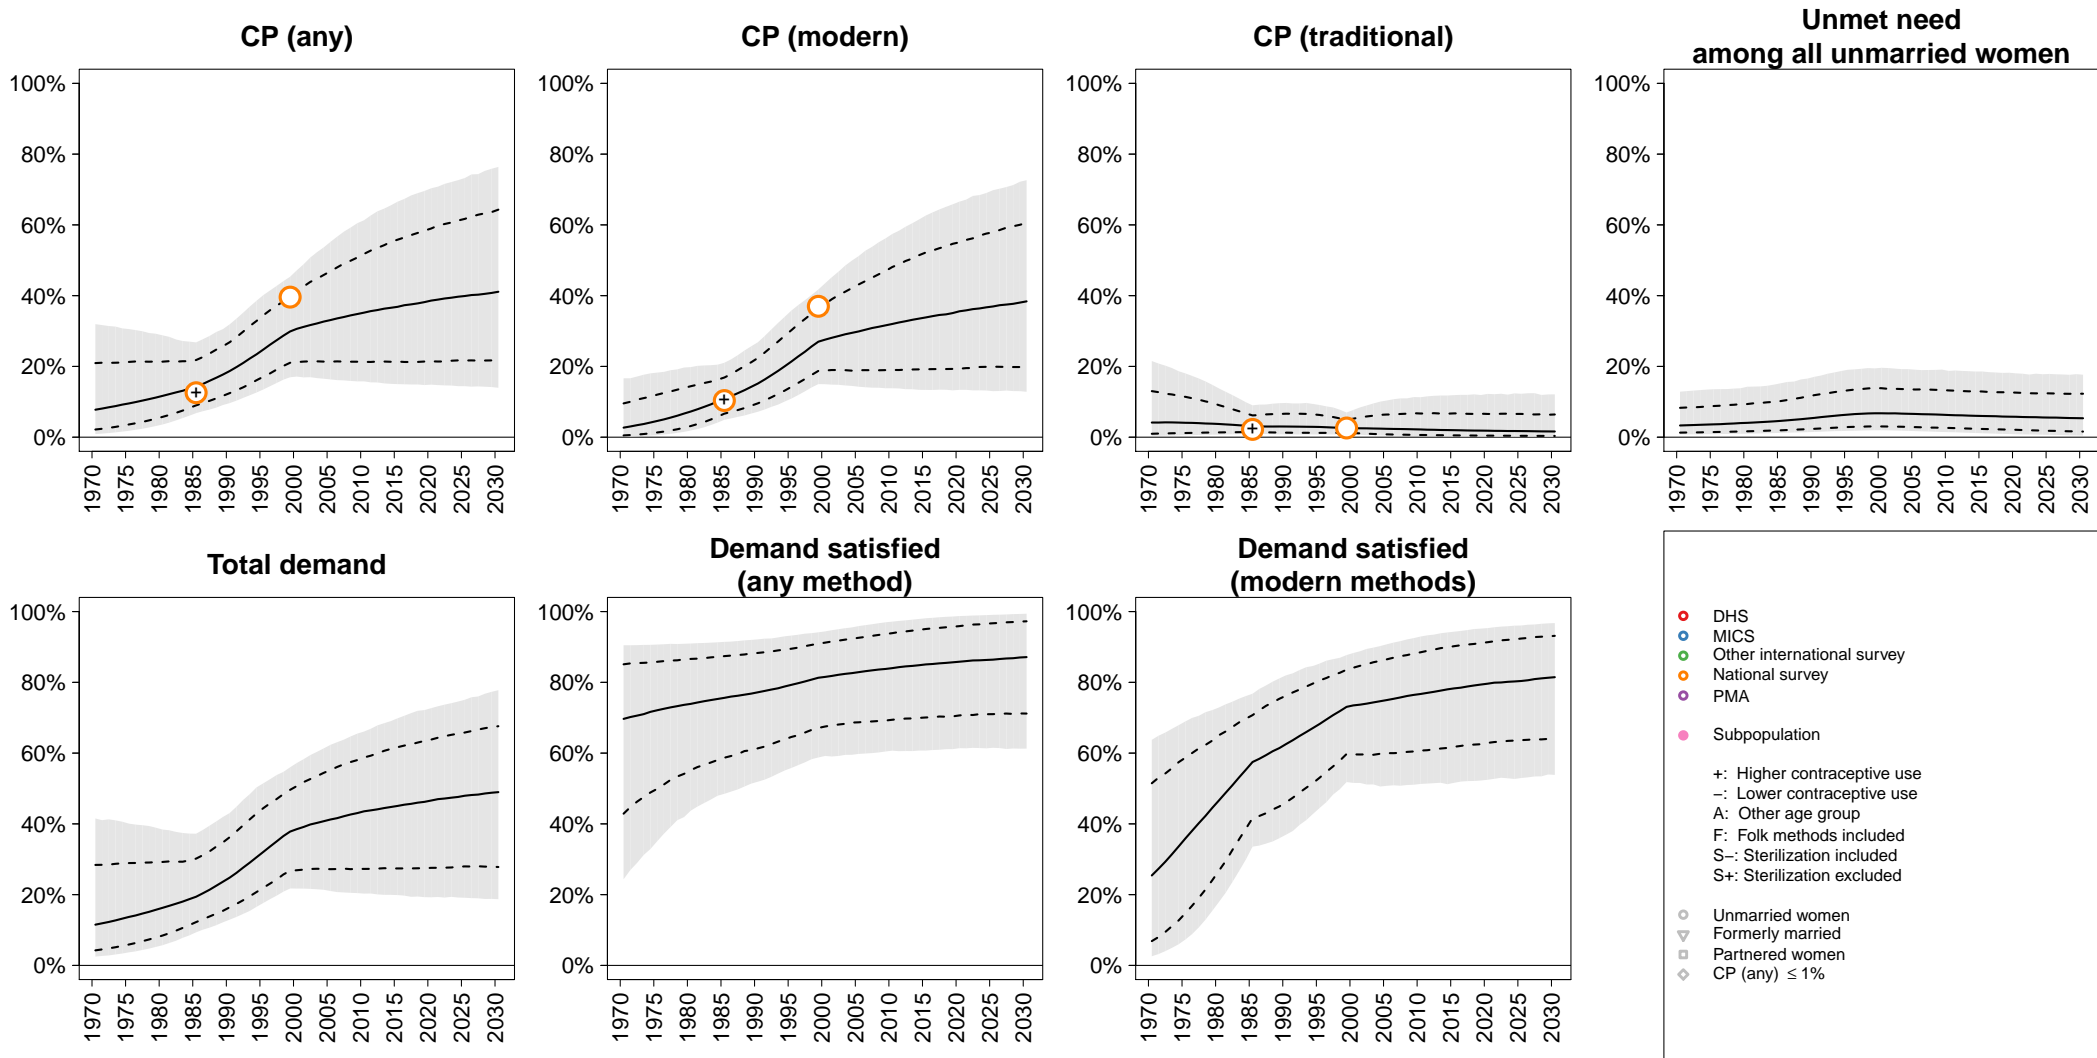

Sri Lanka (Southern Asia, SA Group 0) --- Unmarried / Not In-Union

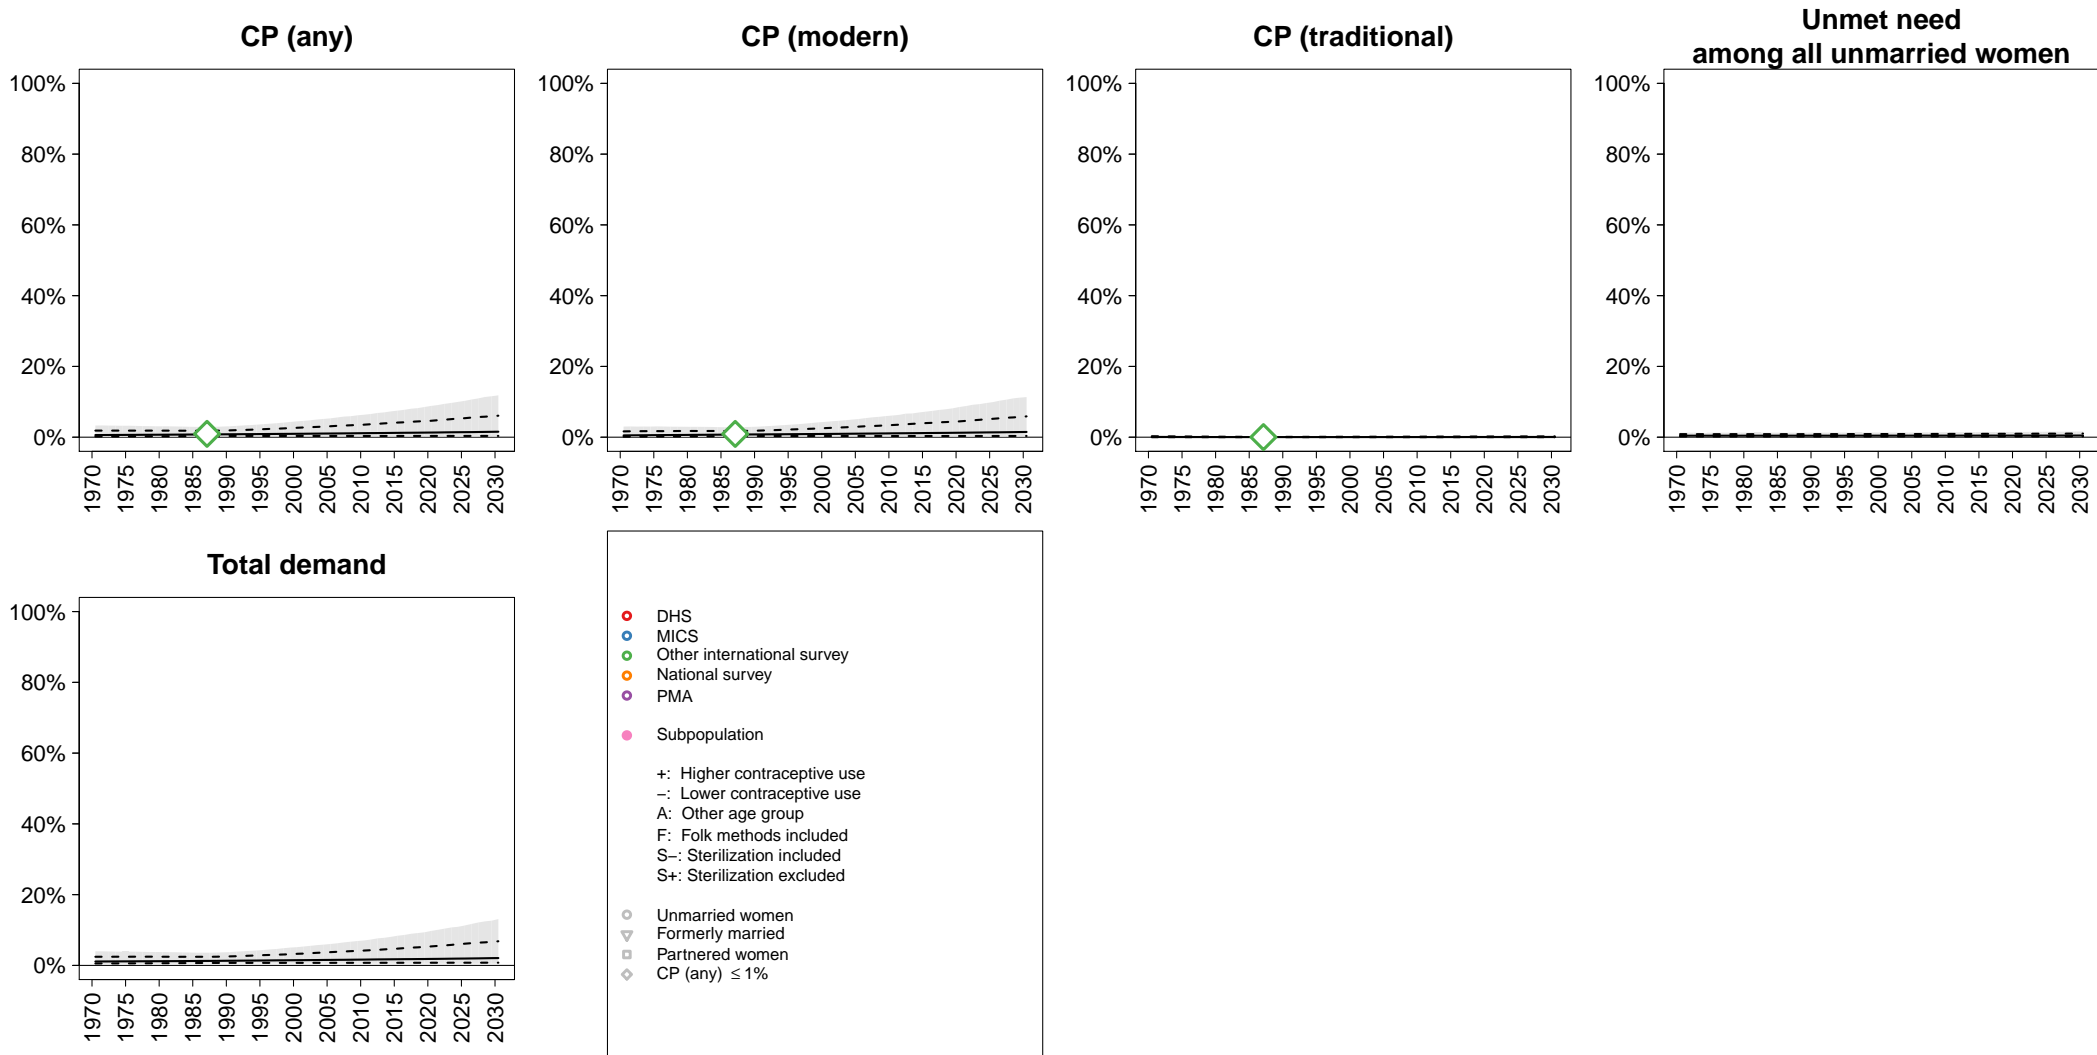

St. Lucia (Caribbean, SA Group 1) --- Unmarried / Not In-Union

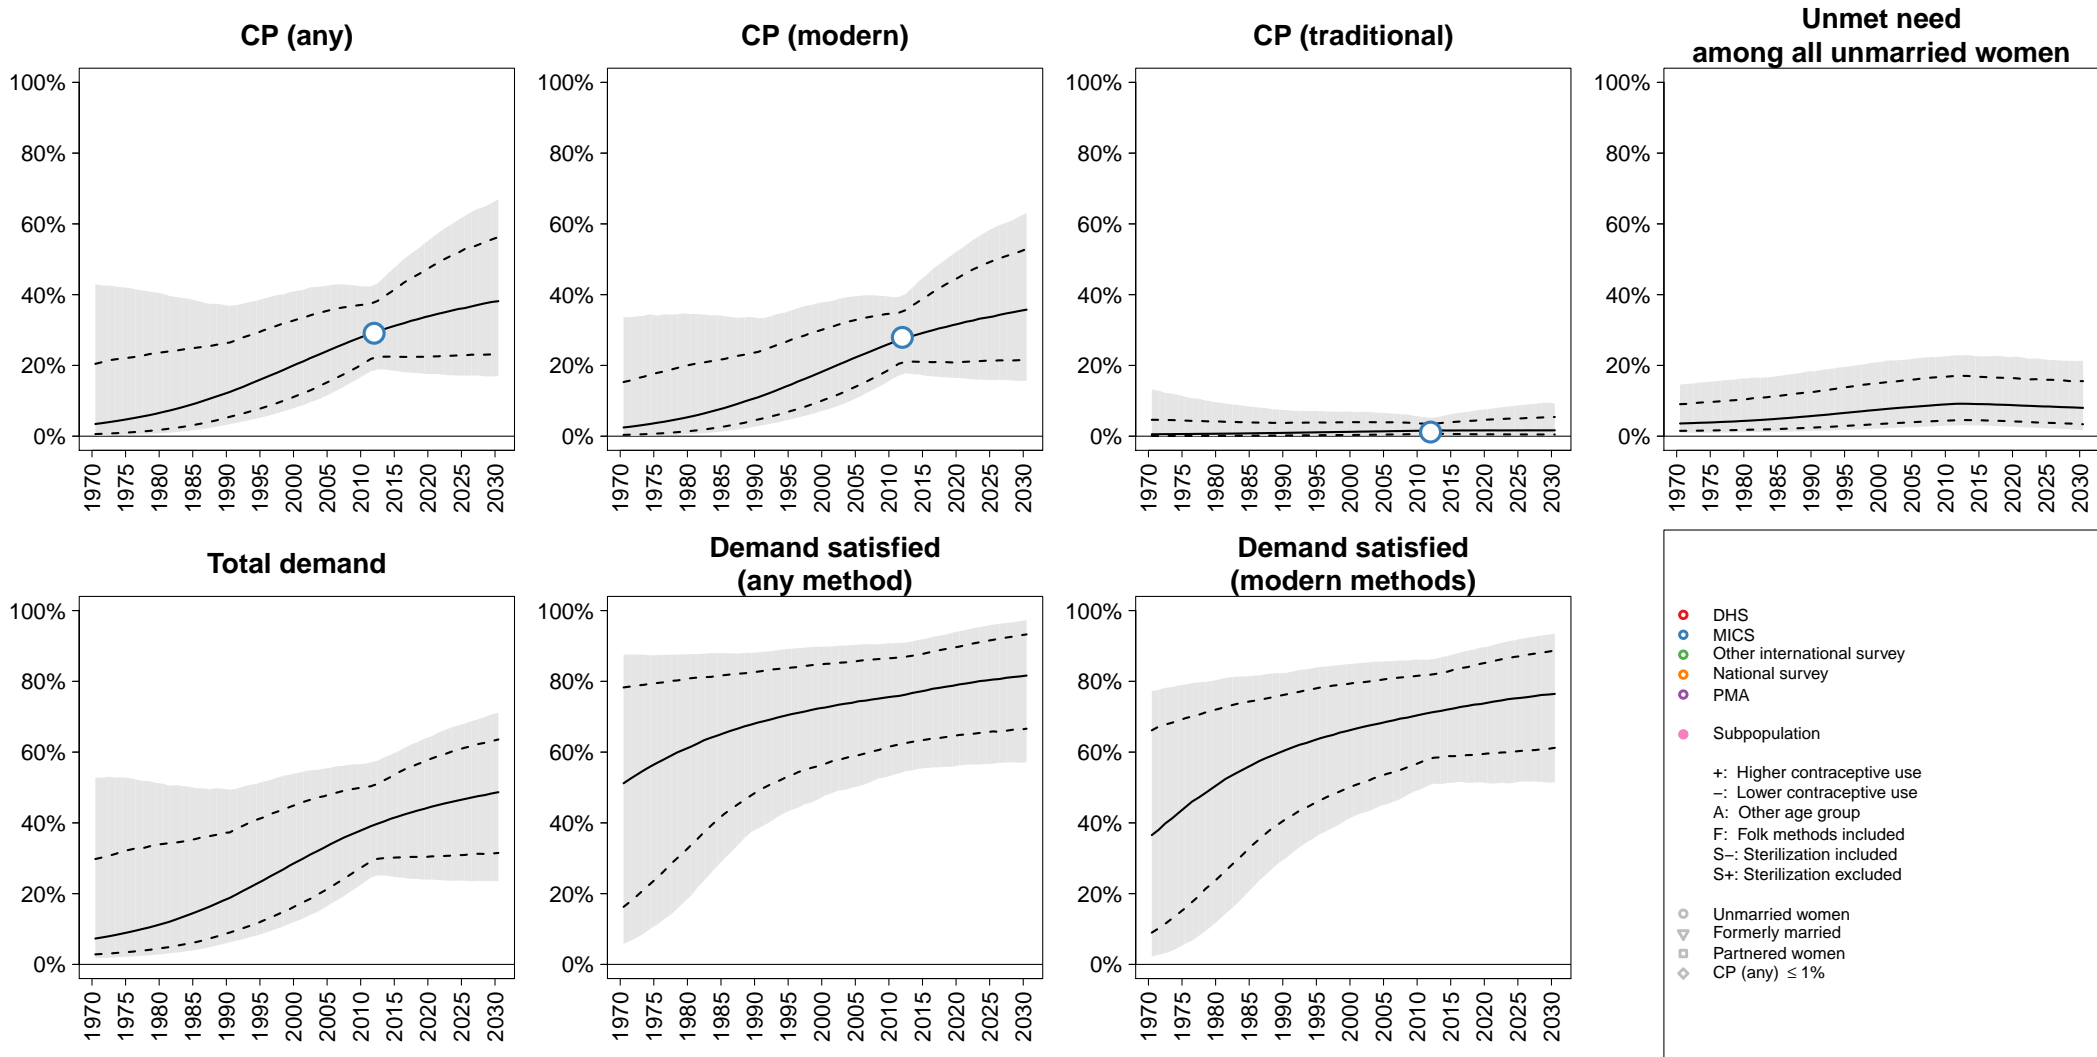

St. Vincent and the Grenadines (Caribbean, SA Group 1) --- Unmarried / Not In-Union

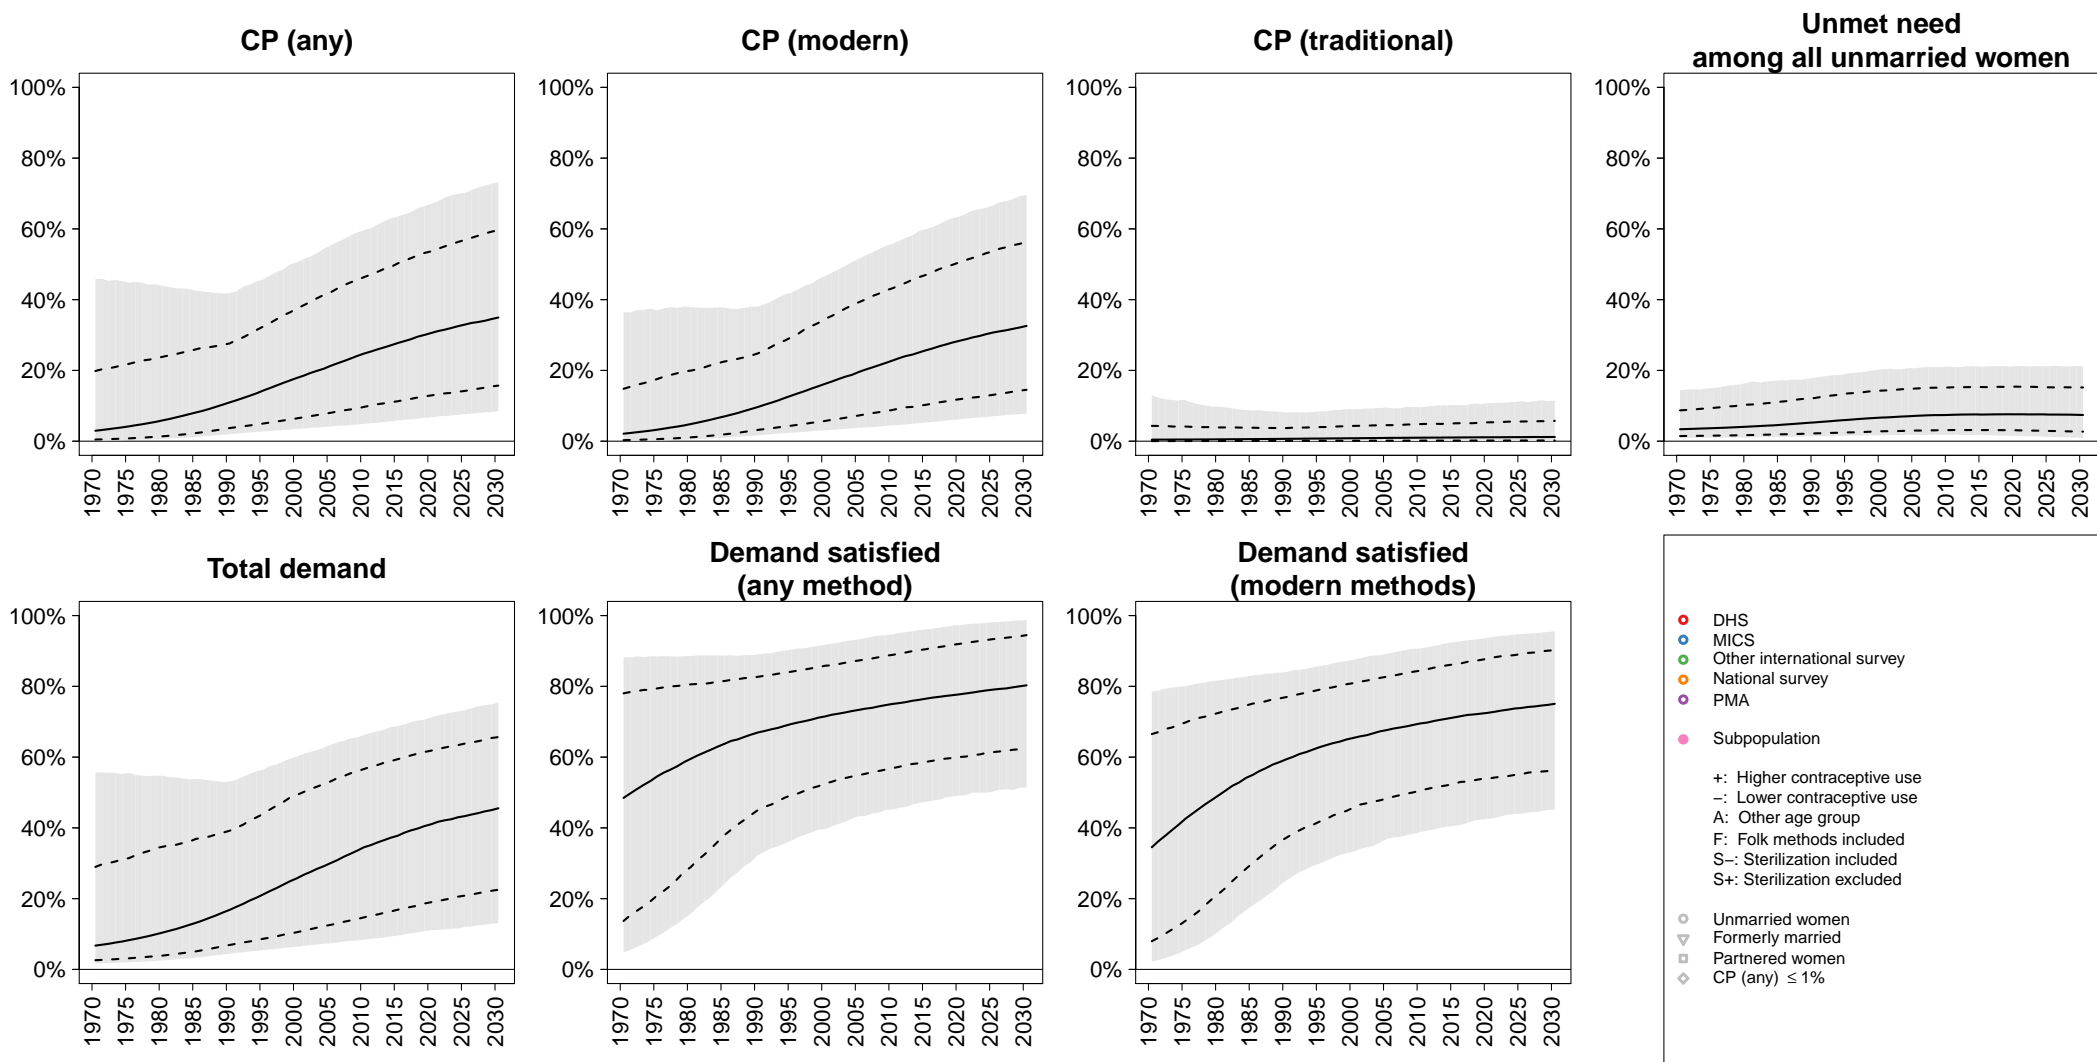

State of Palestine (Western Asia, SA Group 0) --- Unmarried / Not In-Union

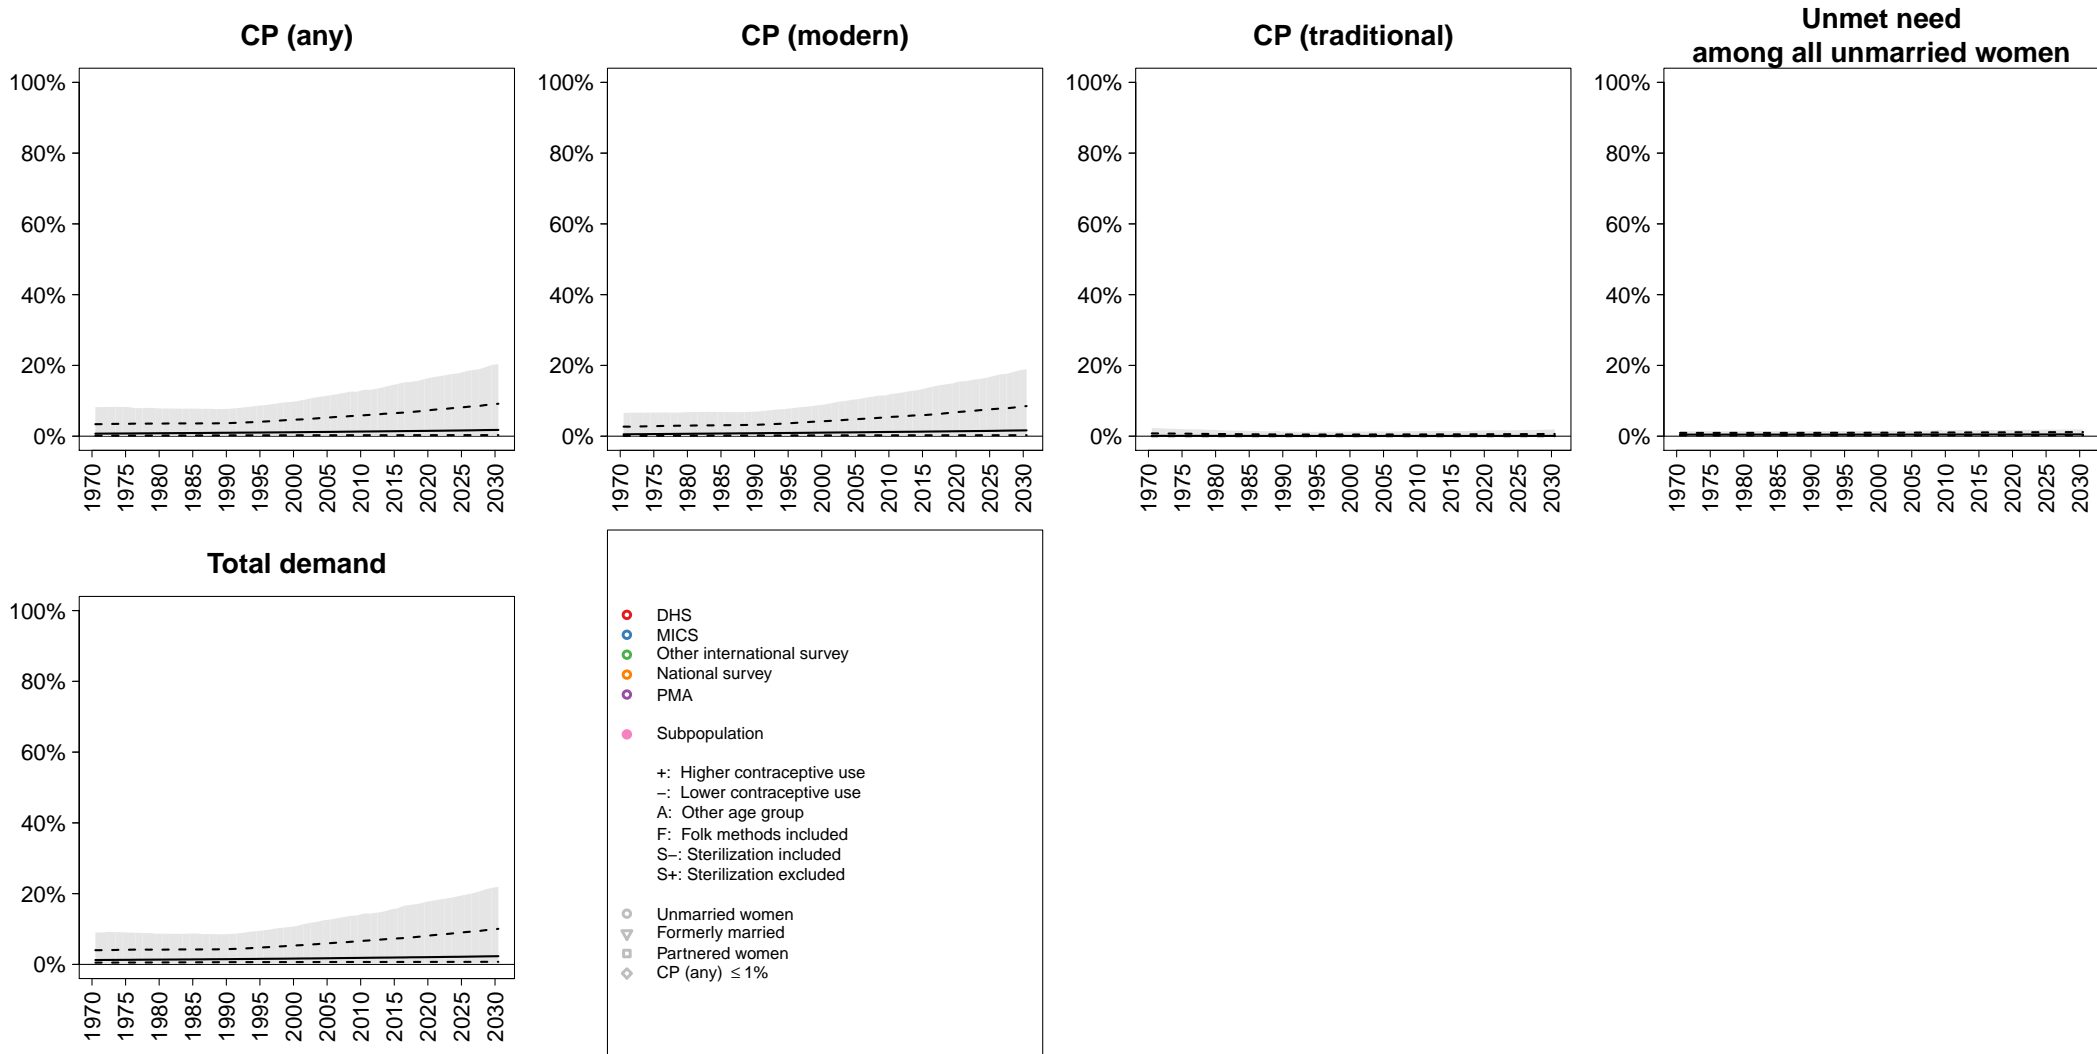



Sudan (Northern Africa, SA Group 0) --- Unmarried / Not In-Union

CP (any)

CP (modern)

CP (traditional)

Unmet need among all unmarried women

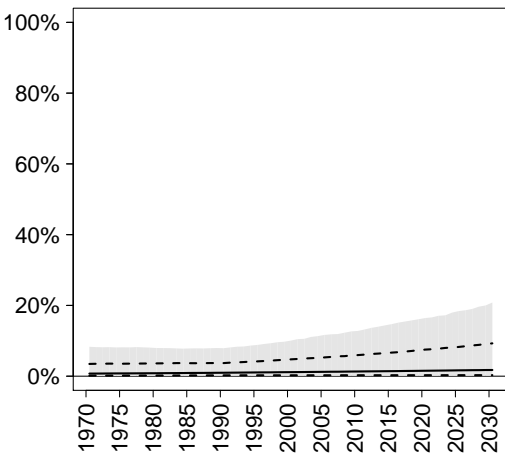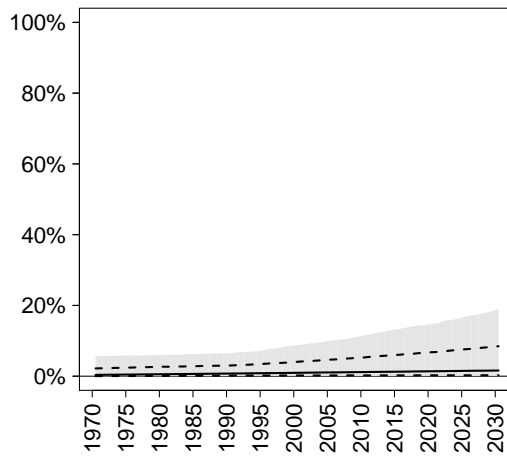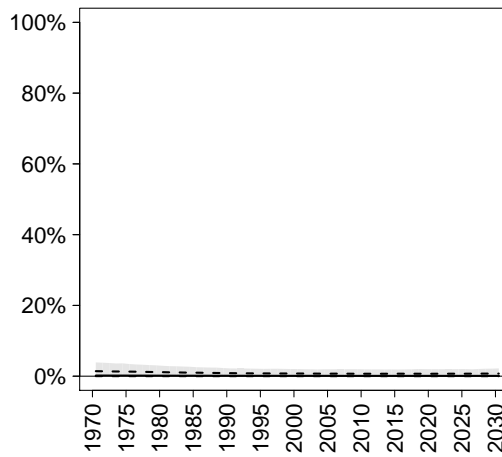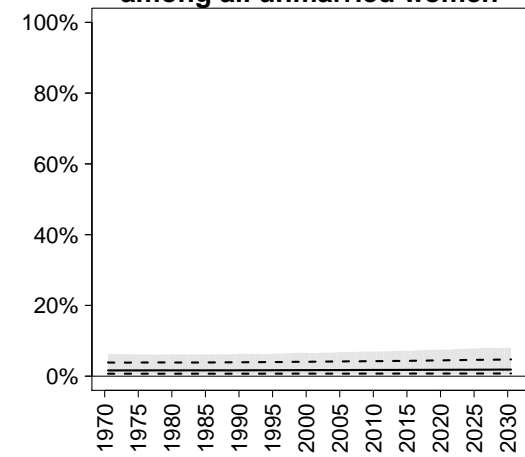

Total demand

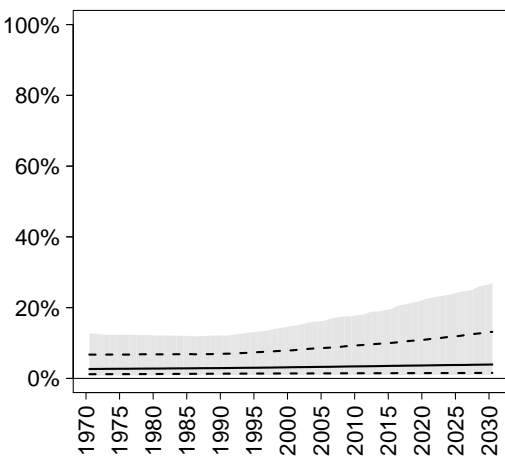

- DHS
- MICS
- Other international survey
- National survey
- PMA
- Subpopulation
- +: Higher contraceptive use
- : Lower contraceptive use
- A: Other age group
- F: Folk methods included
- S-: Sterilization included
- S+: Sterilization excluded
- Unmarried women
- ▽ Formerly married
- ◻ Partnered women
- ◇ CP (any) ≤ 1%

Suriname (South America, SA Group 1) --- Unmarried / Not In-Union

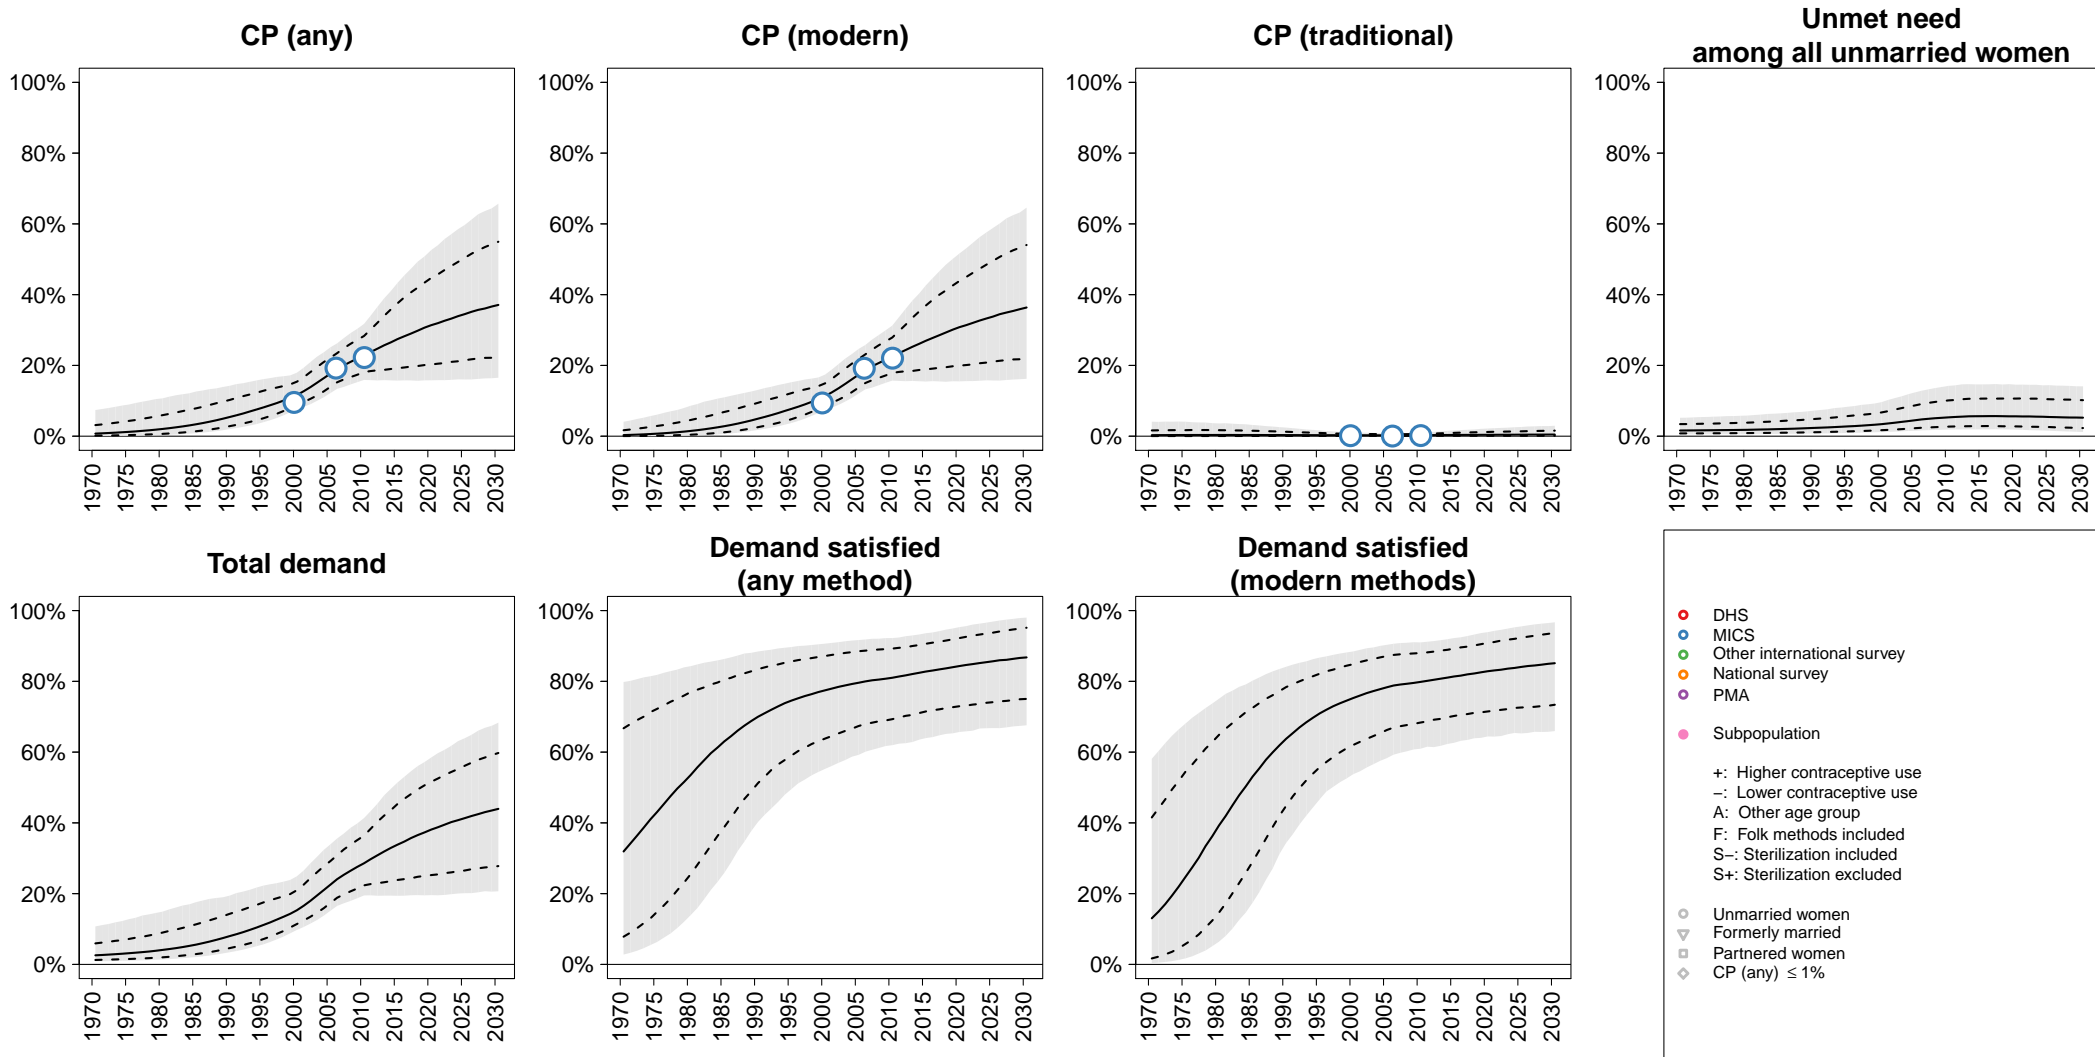

Sweden (Northern Europe, SA Group 1) --- Unmarried / Not In-Union

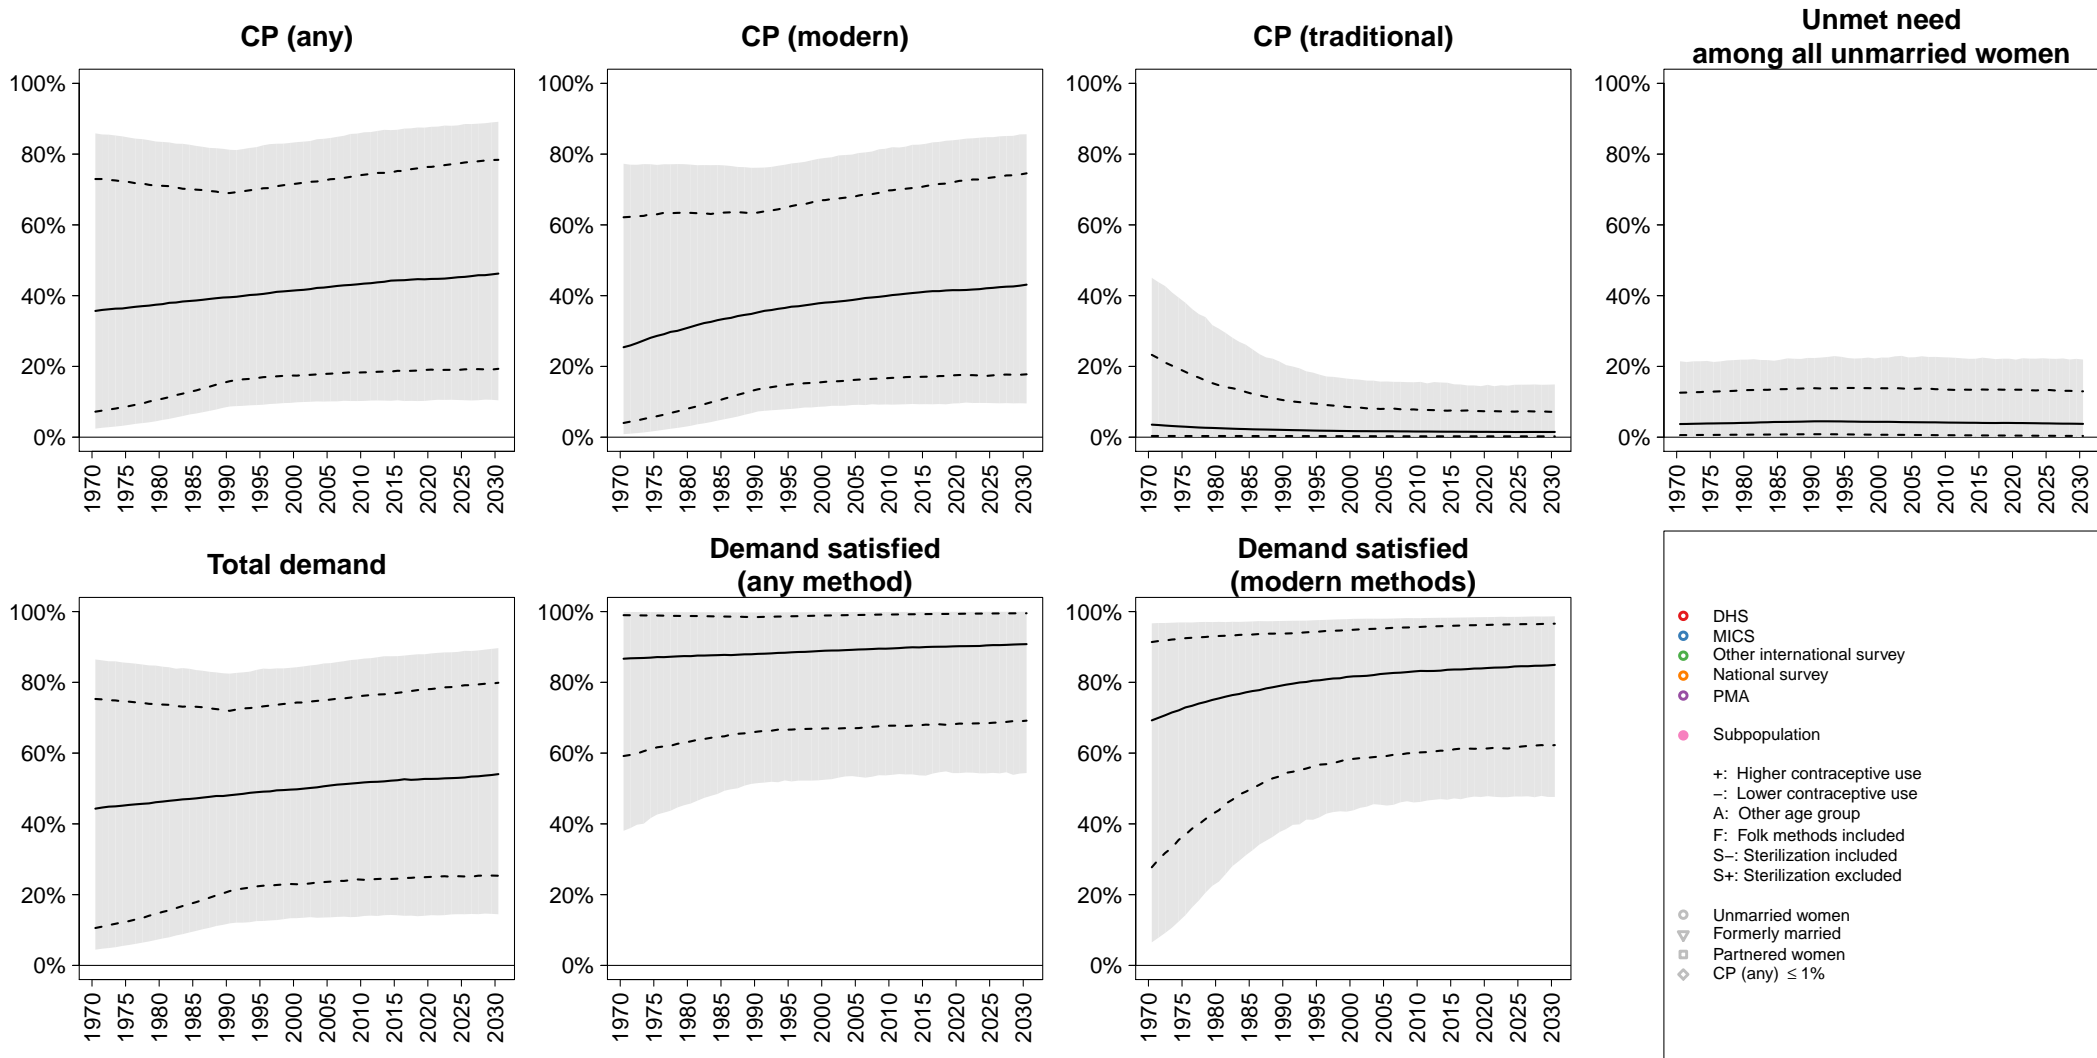

Switzerland (Western Europe, SA Group 1) --- Unmarried / Not In-Union

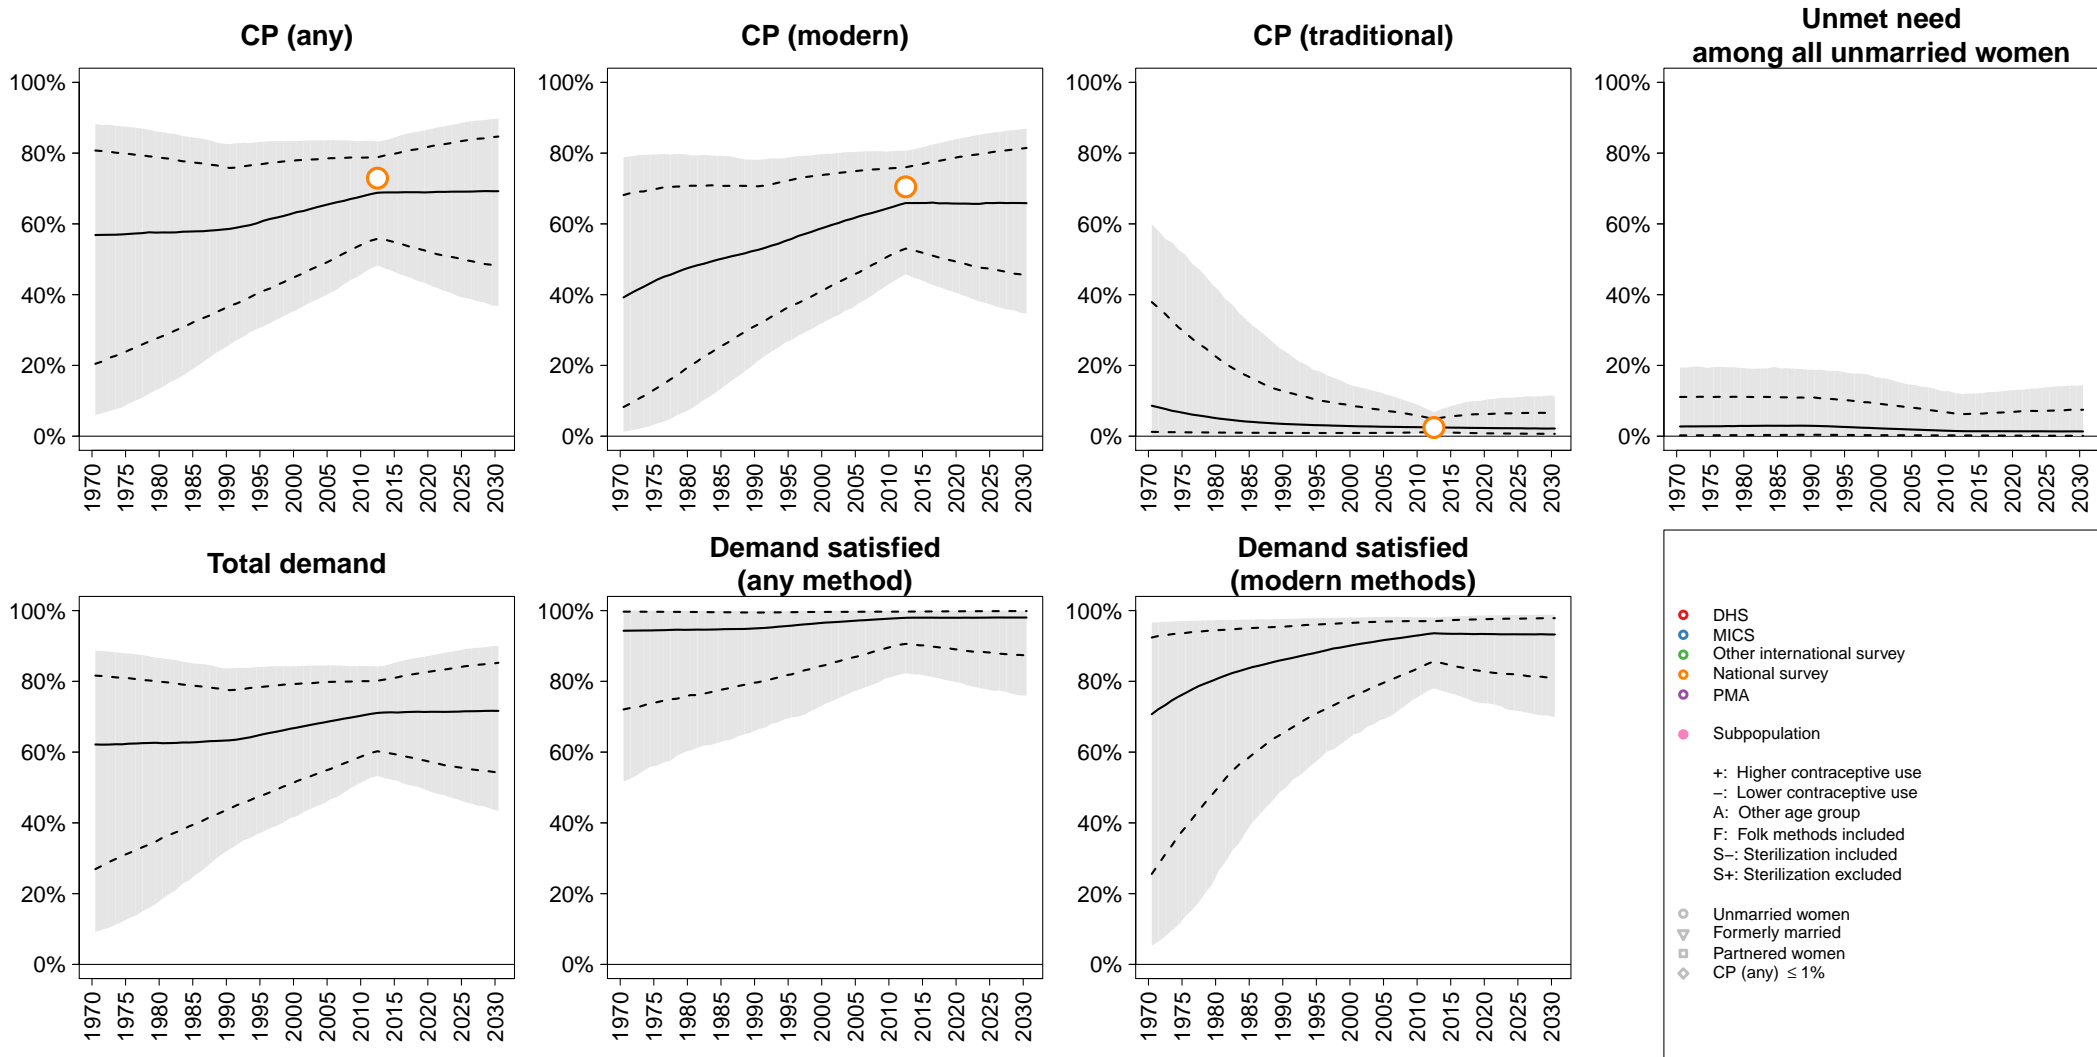

Syrian Arab Republic (Western Asia, SA Group 0) --- Unmarried / Not In-Union

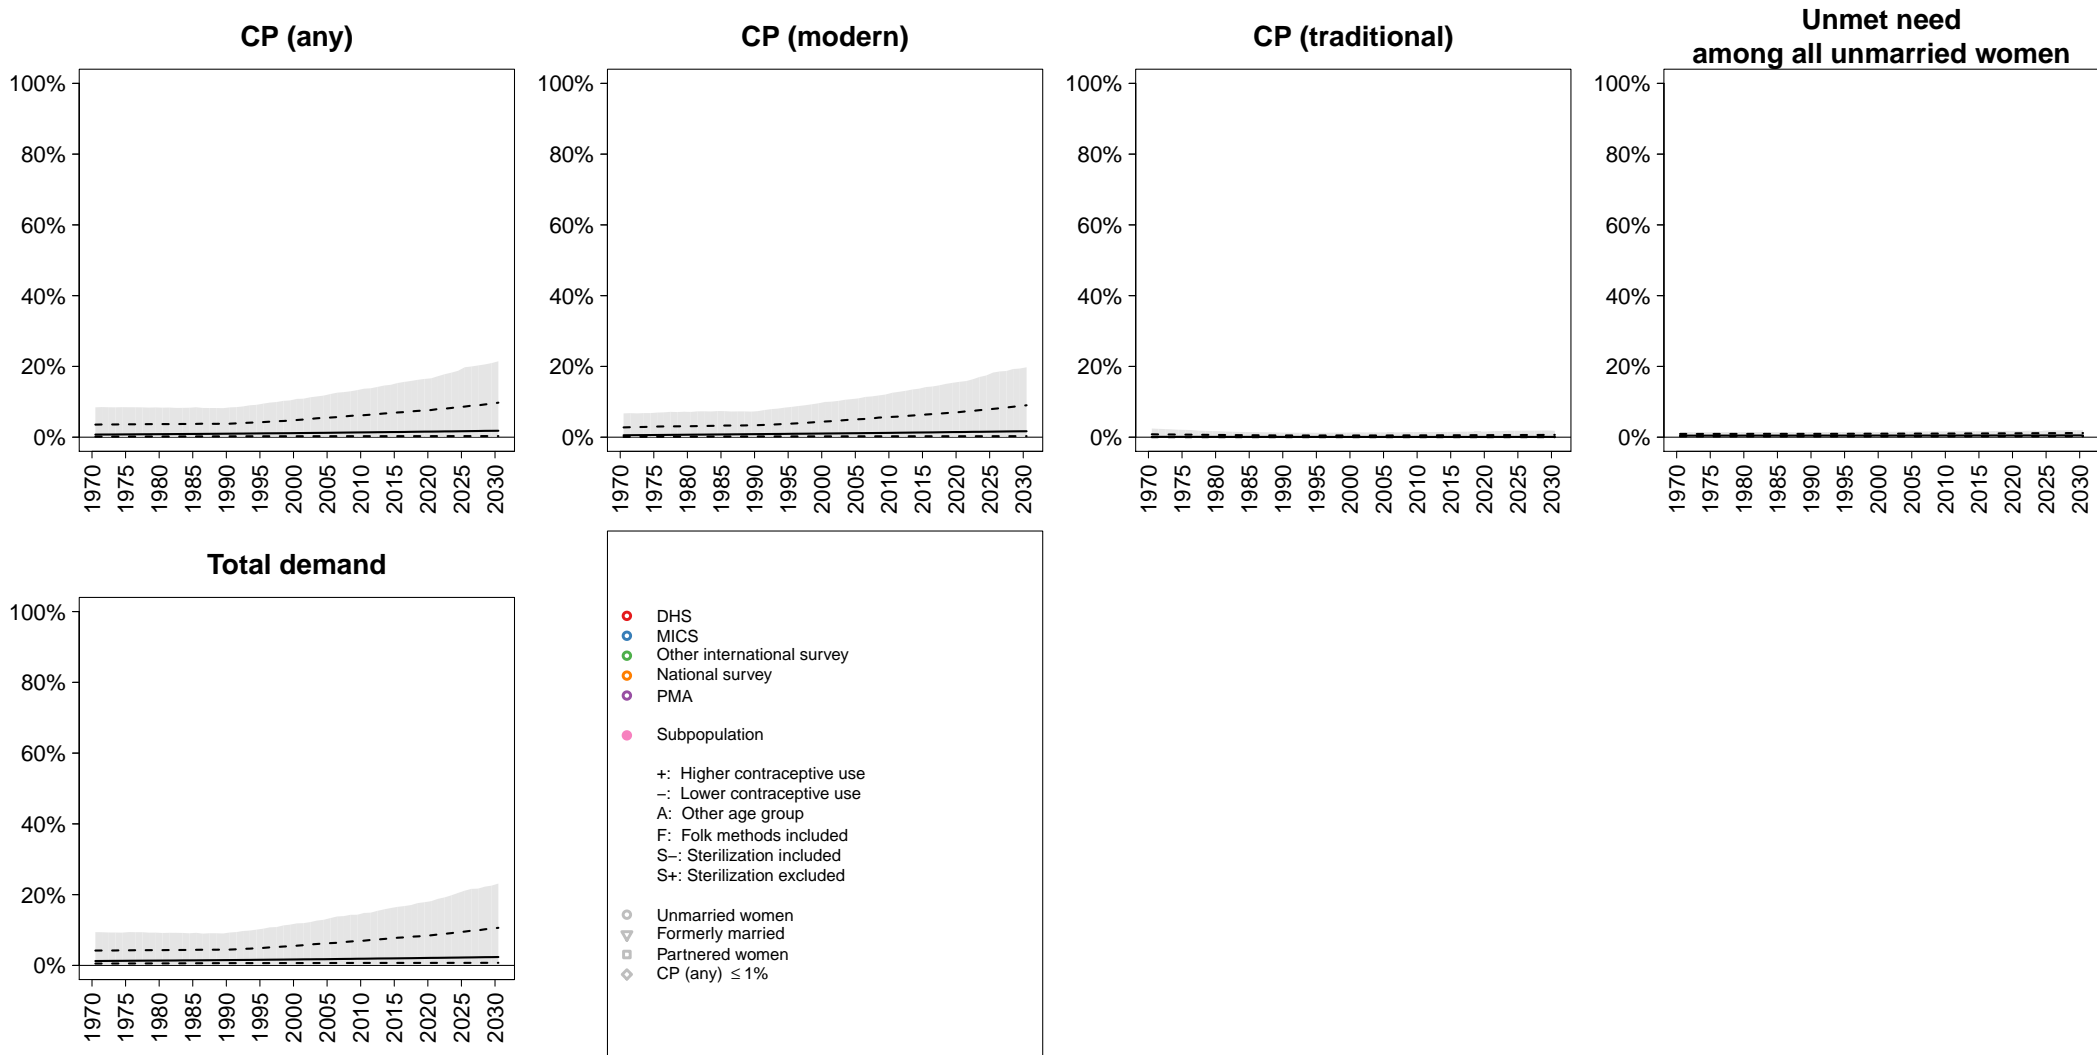

Tajikistan (Central Asia, SA Group 0) --- Unmarried / Not In-Union

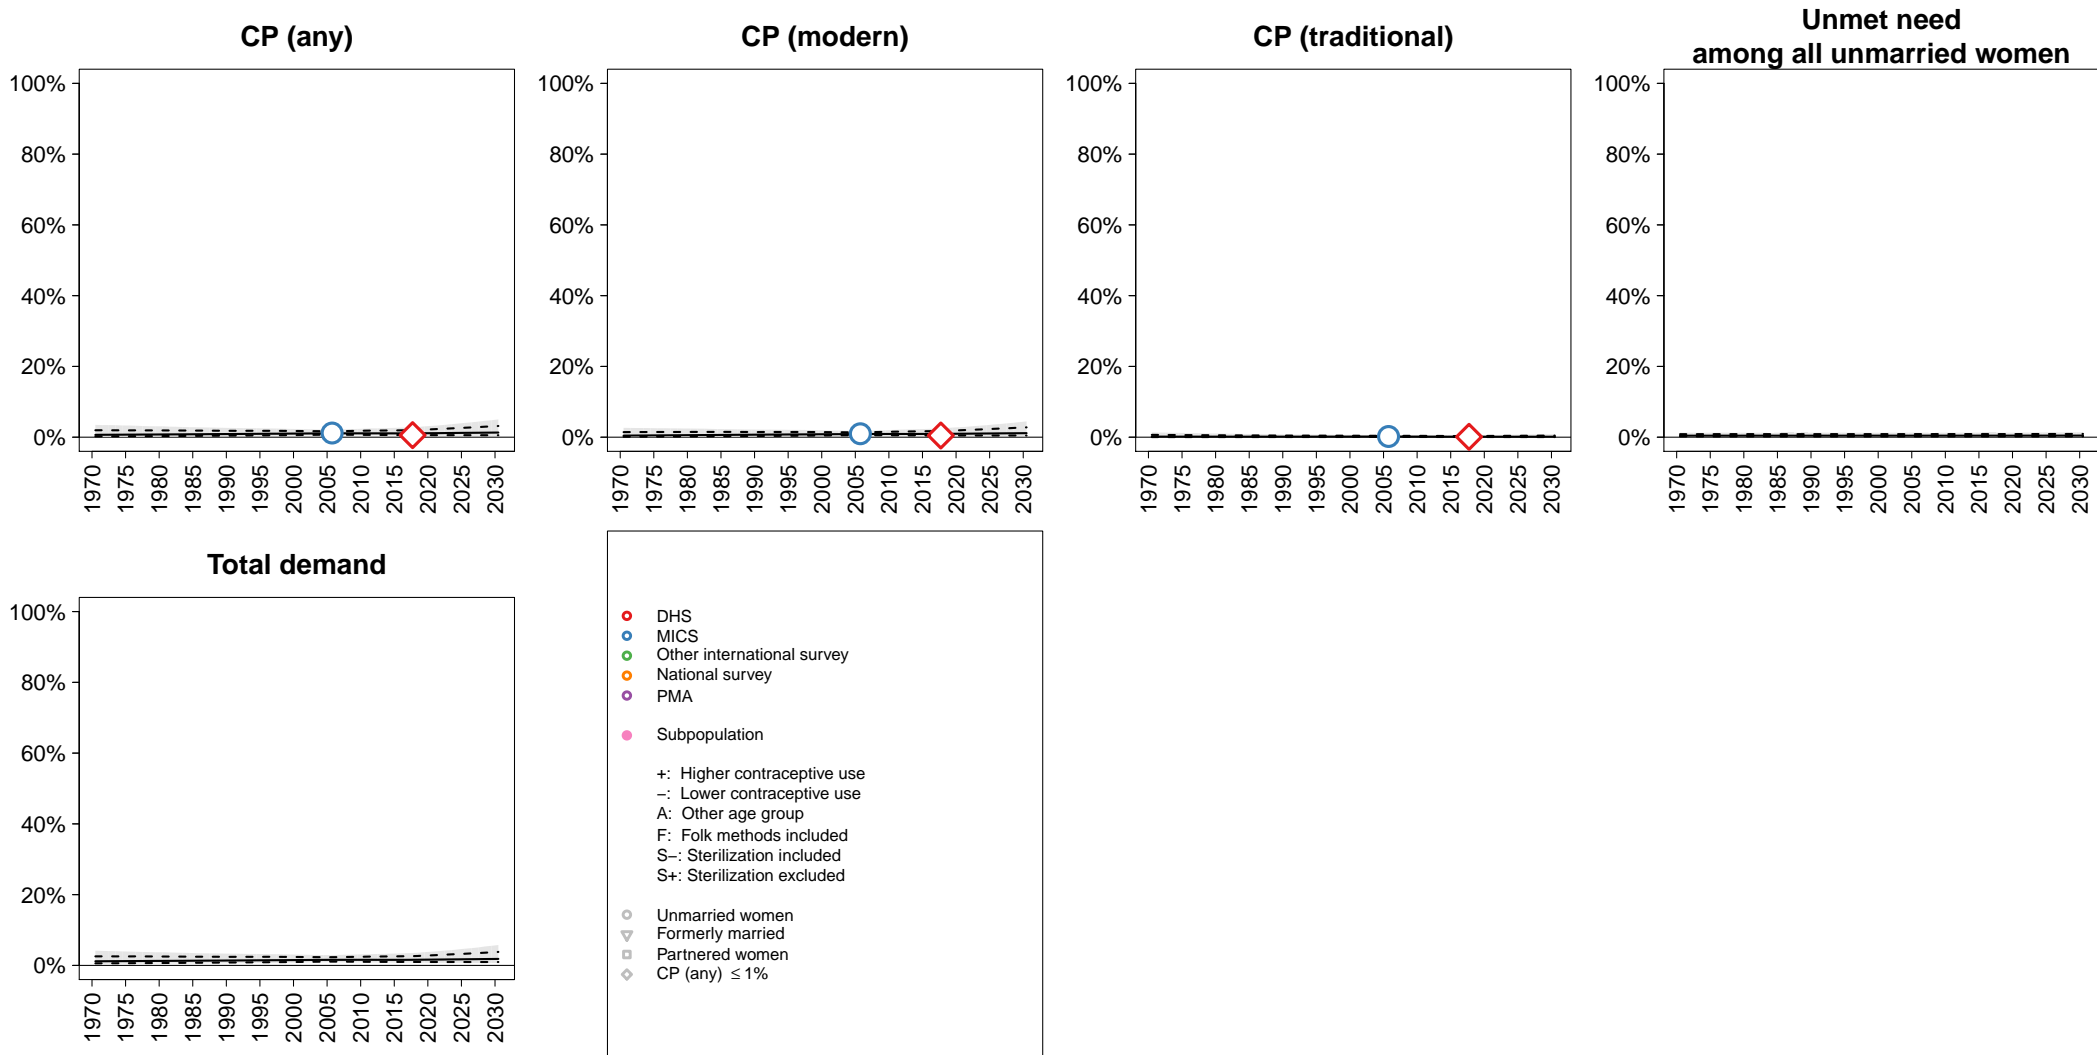

Thailand (South-eastern Asia, SA Group 1) --- Unmarried / Not In-Union

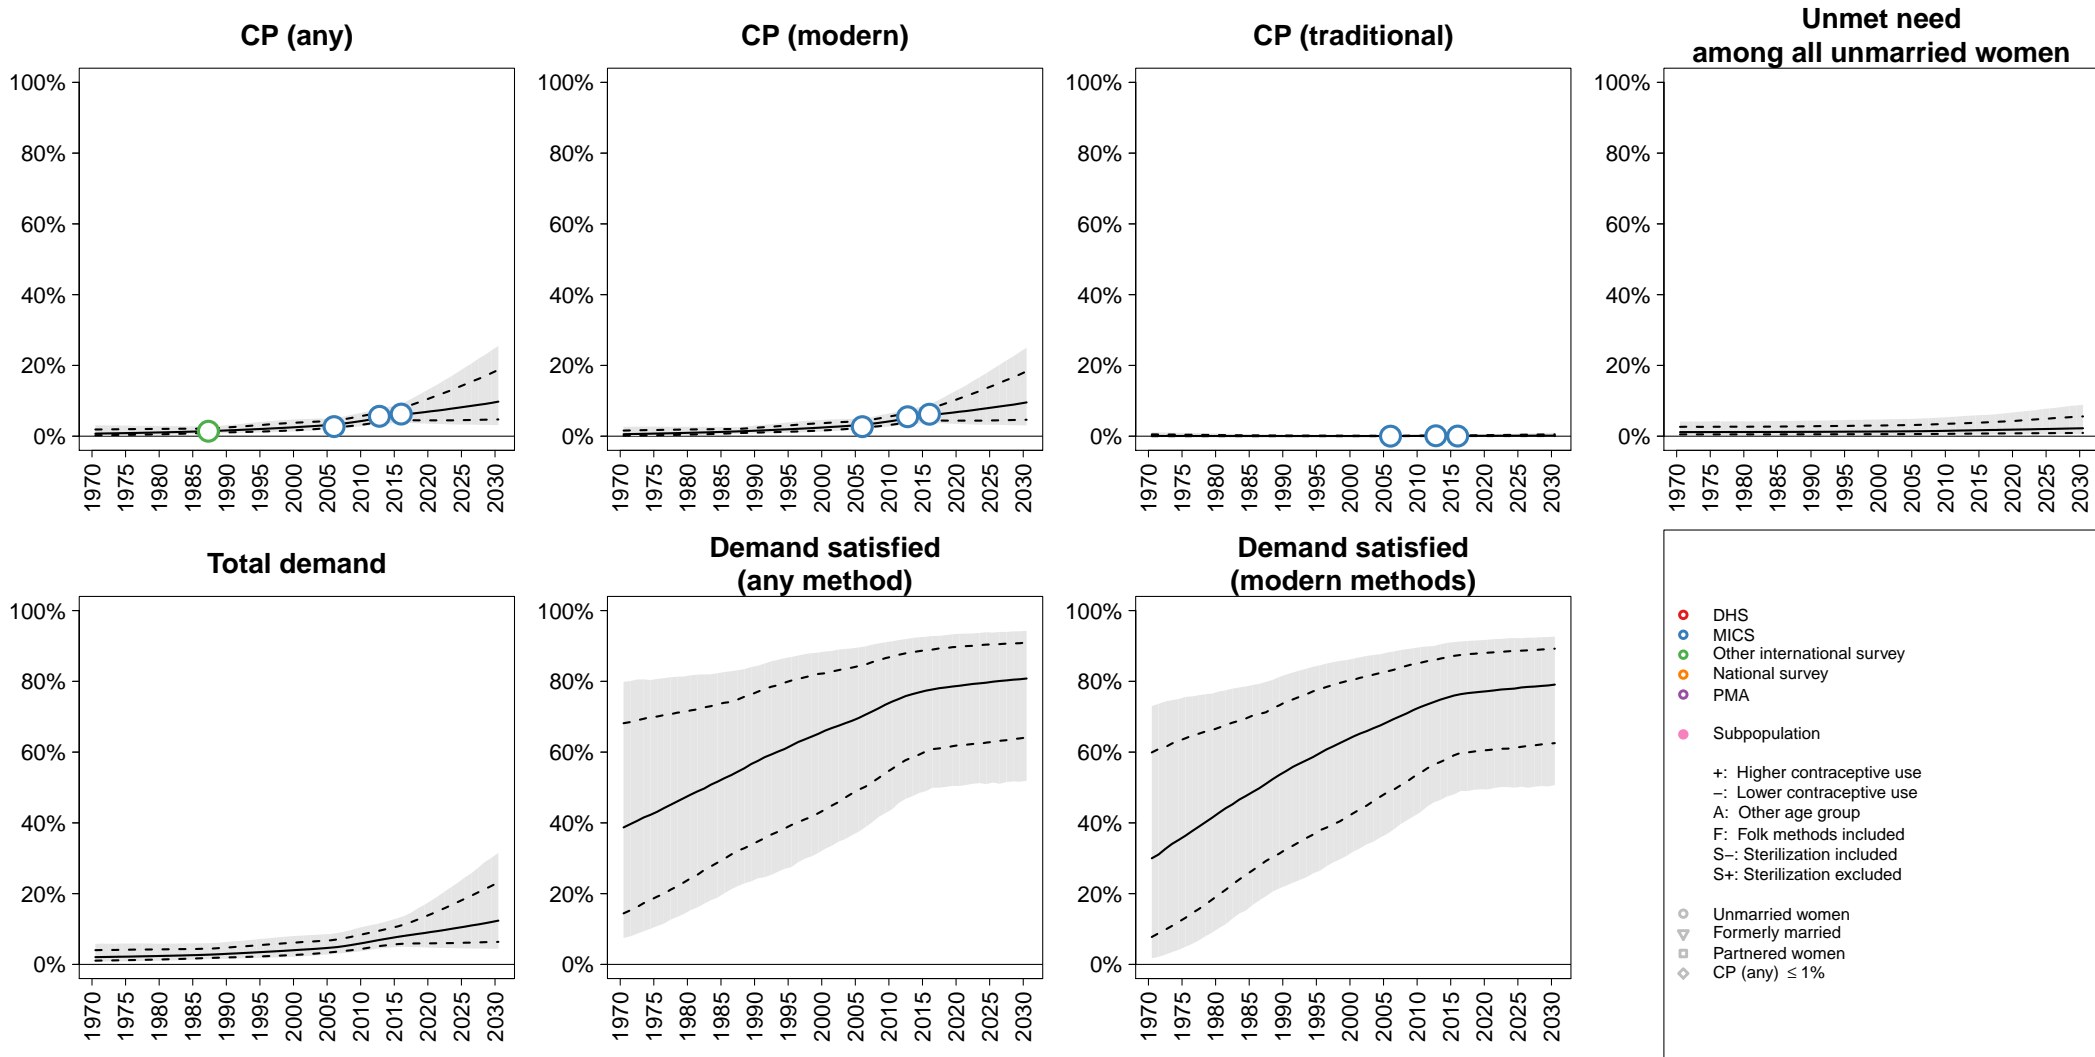

The former Yugoslav Republic of Macedonia (Southern Europe, SA Group 1) --- Unmarried / Not In-Union

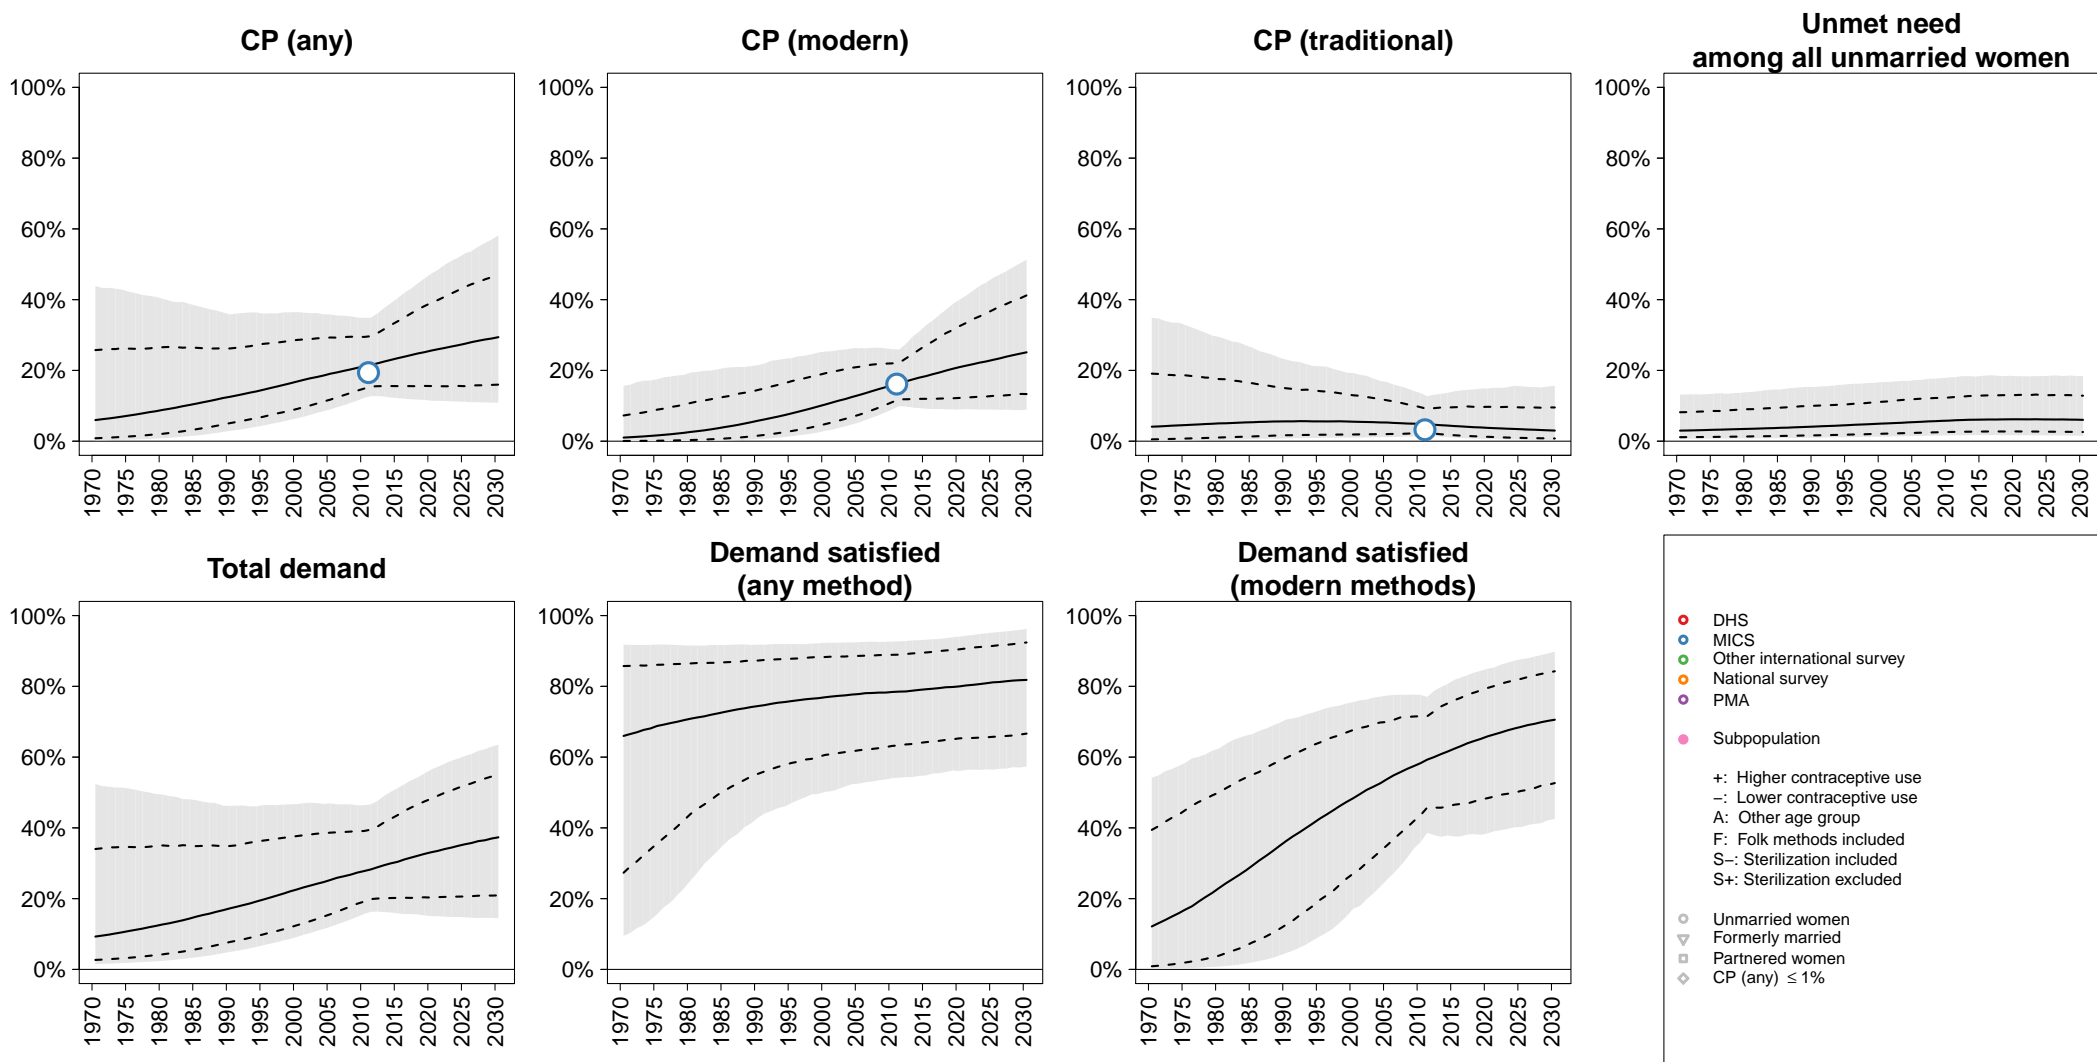



Togo (Western Africa, SA Group 1) --- Unmarried / Not In-Union

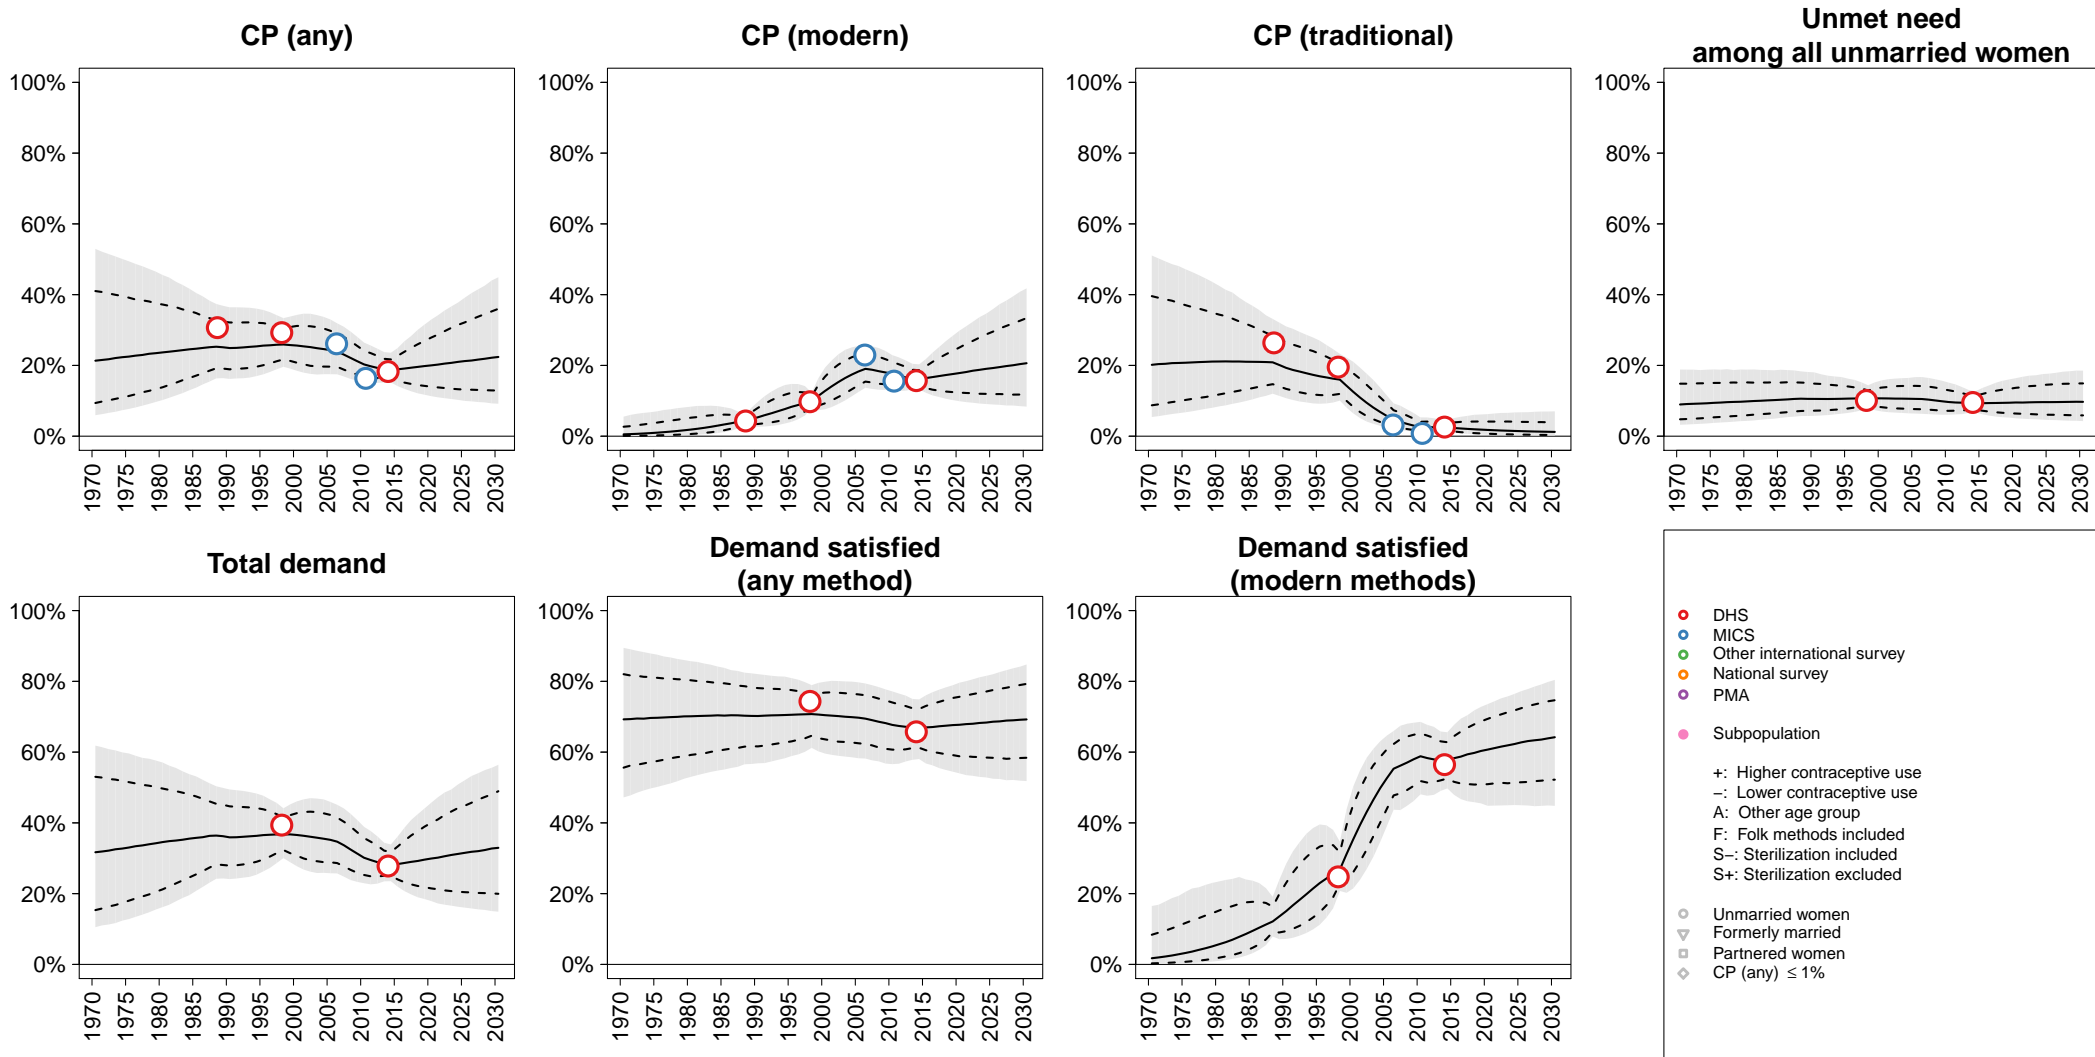

Tonga (Polynesia, SA Group 1) --- Unmarried / Not In-Union

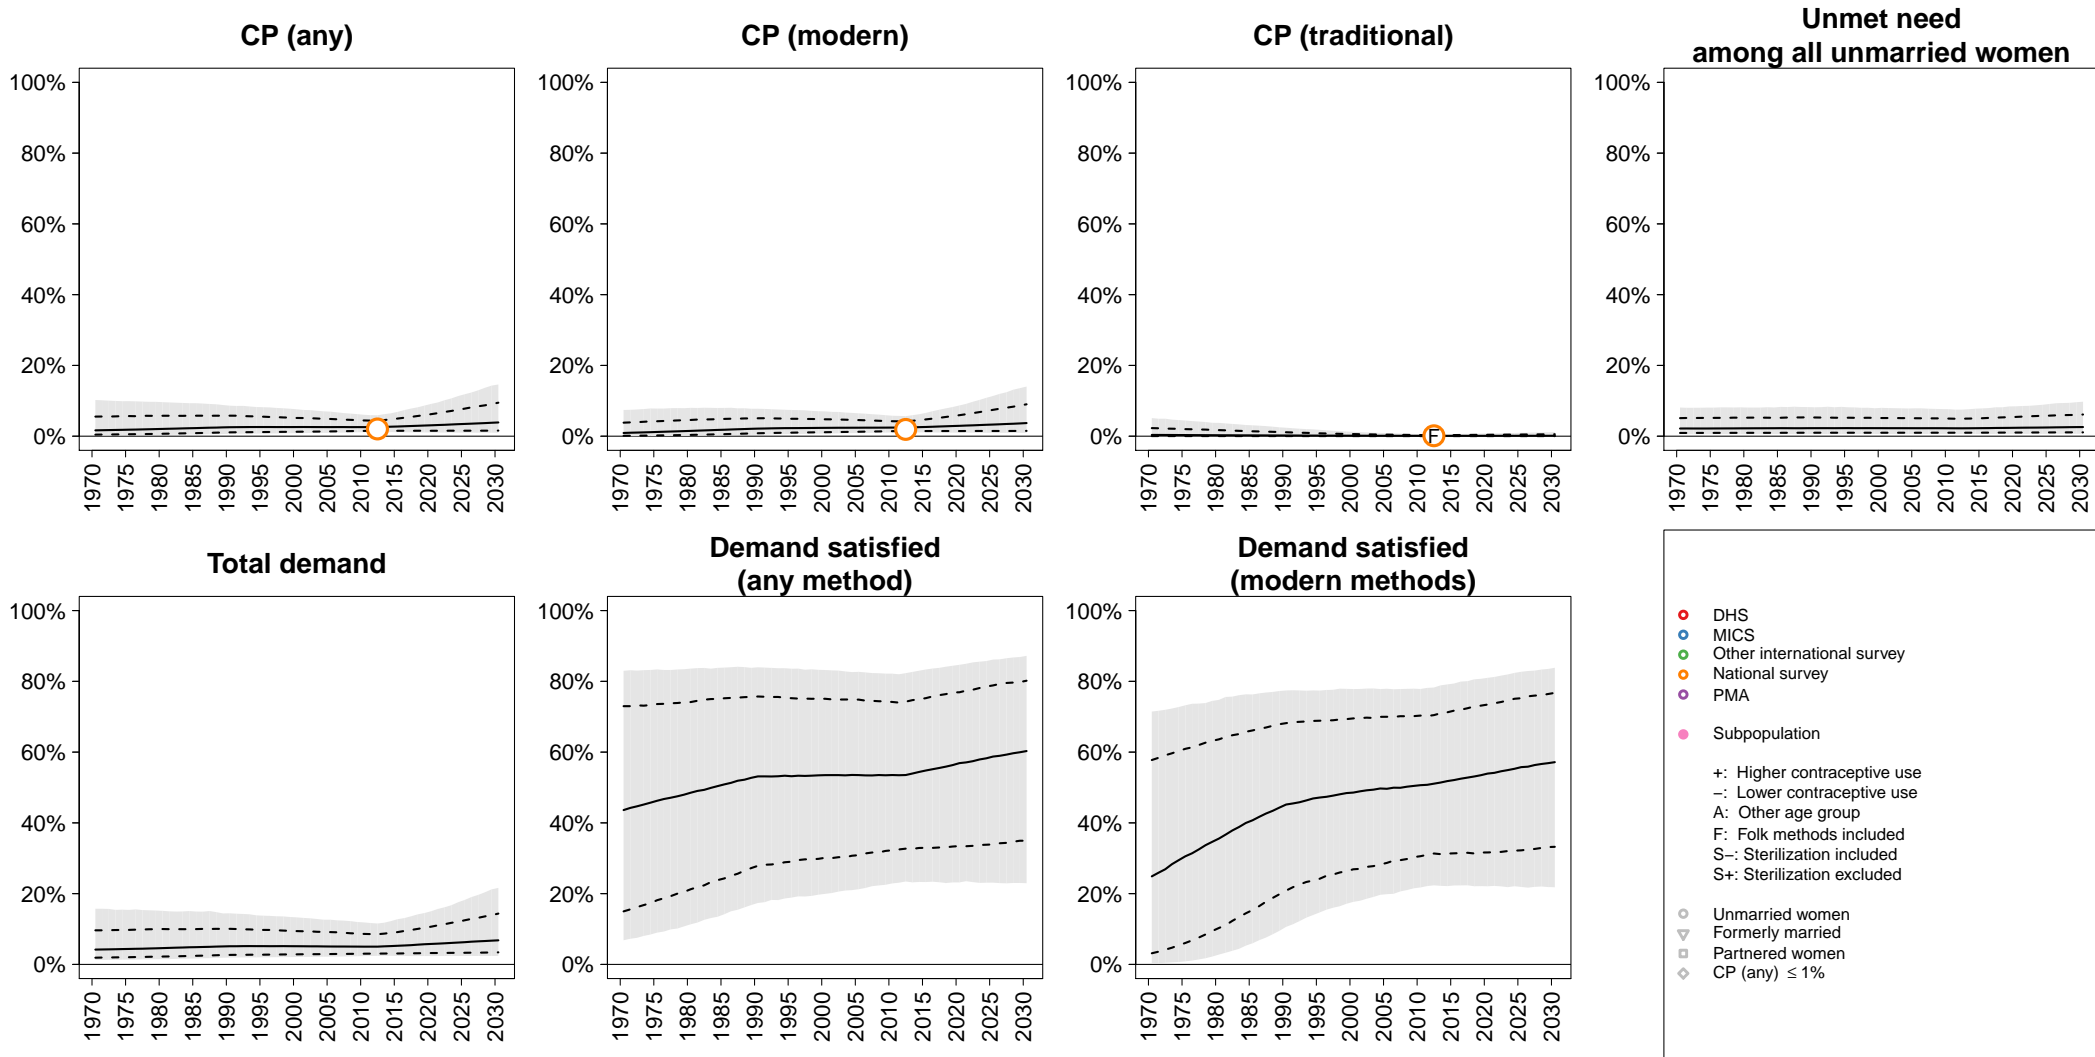

Trinidad and Tobago (Caribbean, SA Group 1) --- Unmarried / Not In-Union

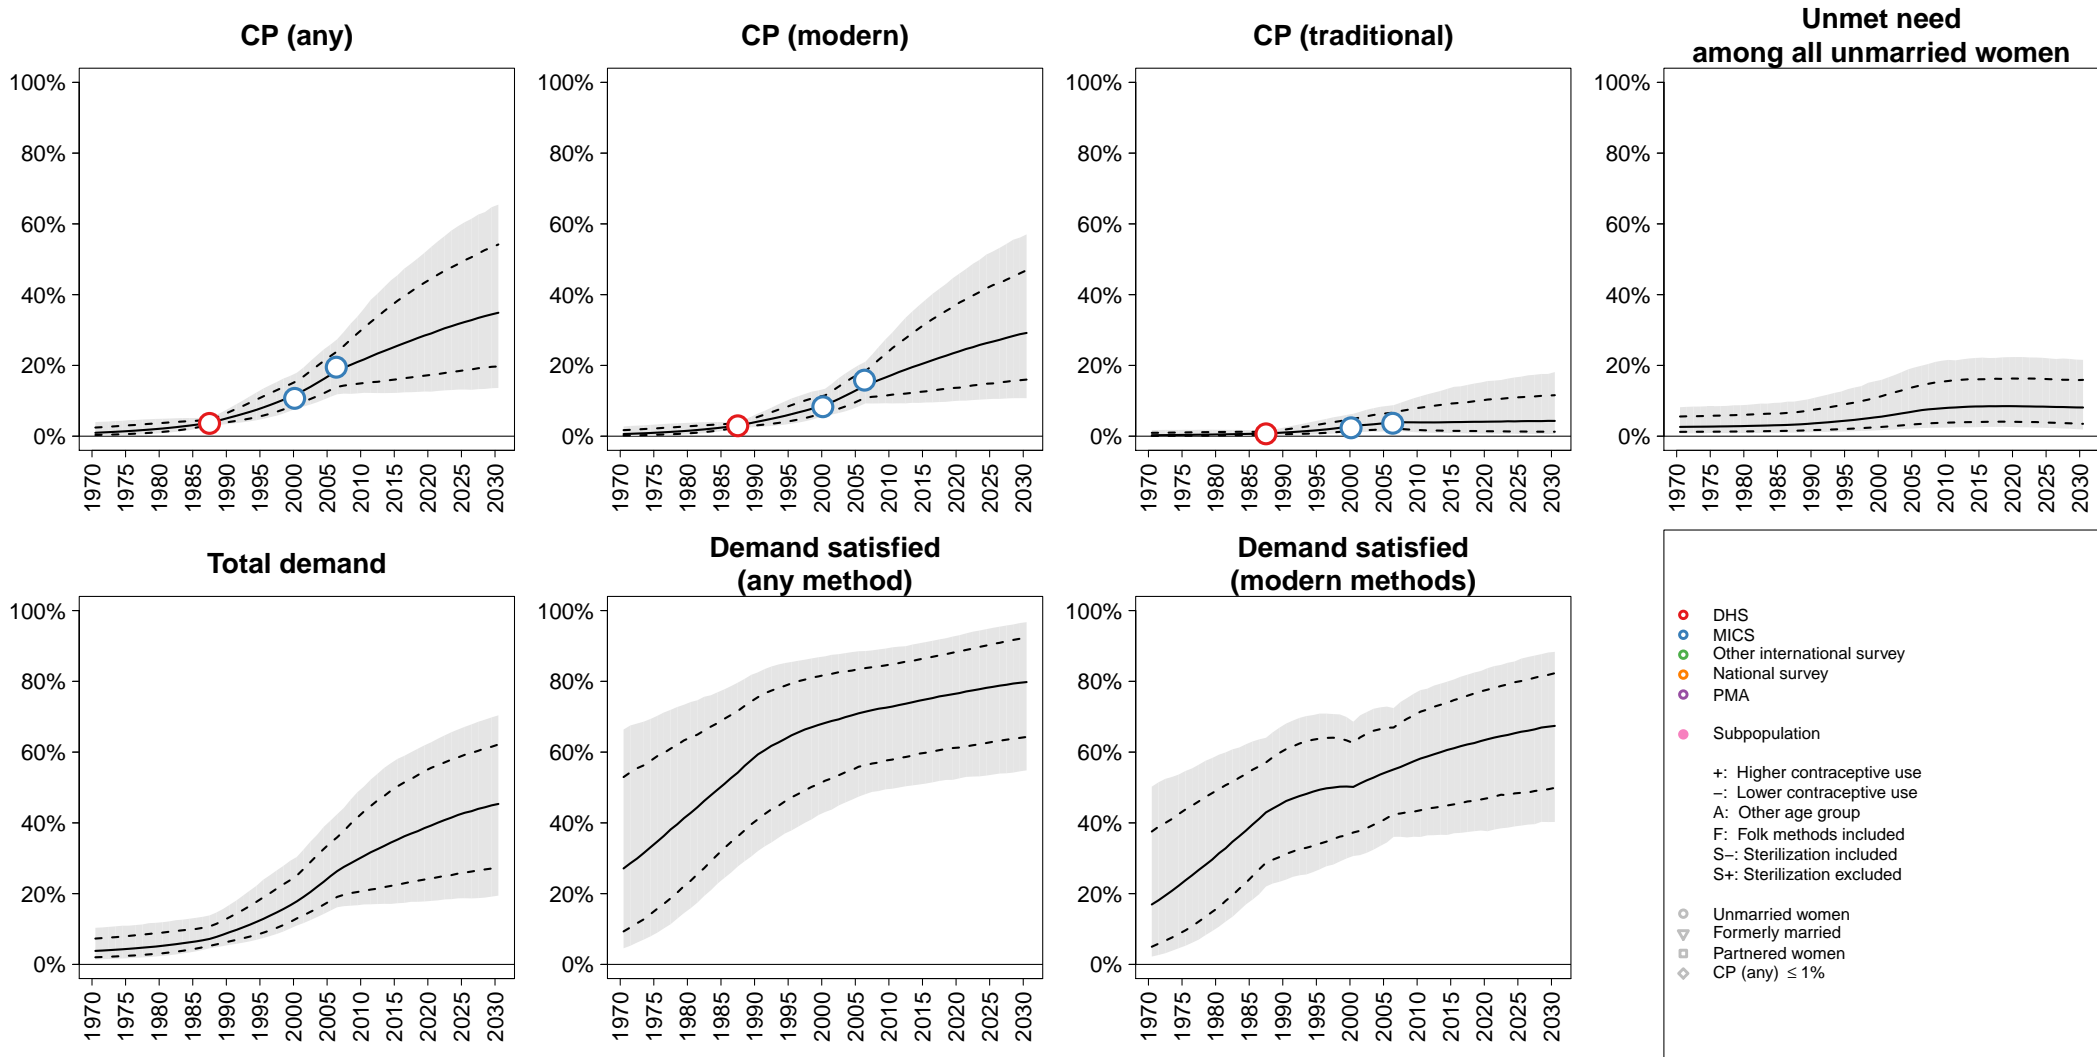

Tunisia (Northern Africa, SA Group 0) --- Unmarried / Not In-Union

CP (any)

CP (modern)

CP (traditional)

Unmet need among all unmarried women

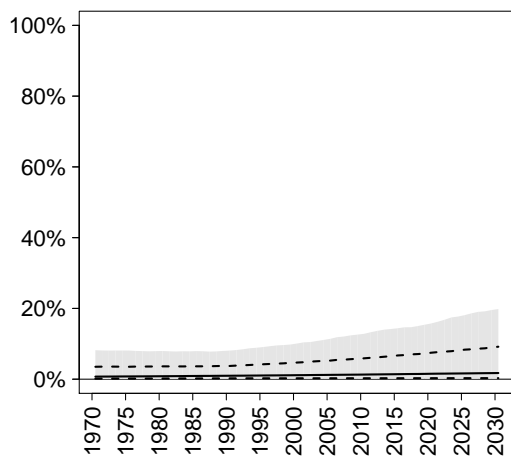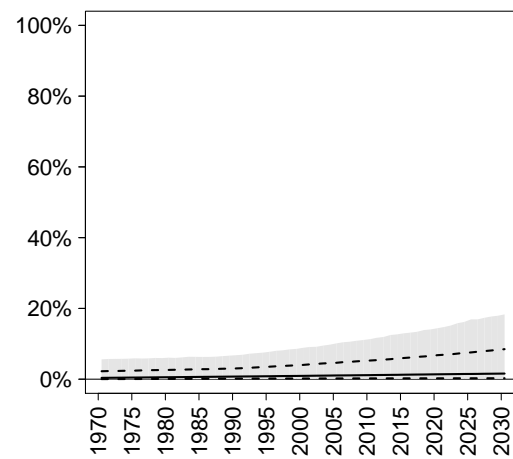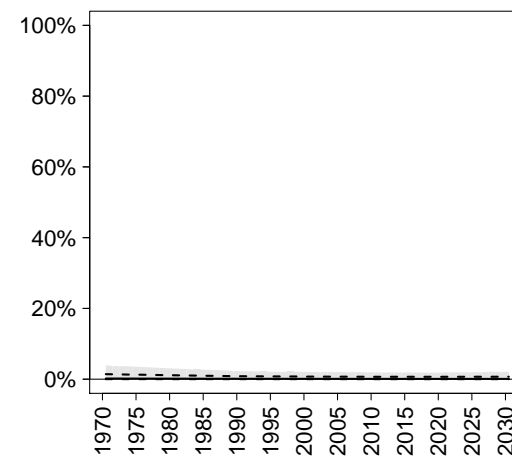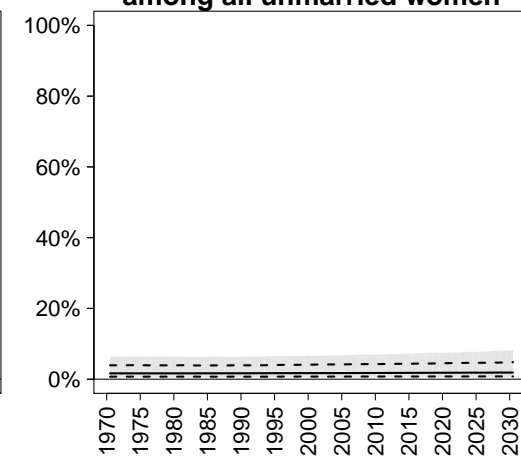

Total demand

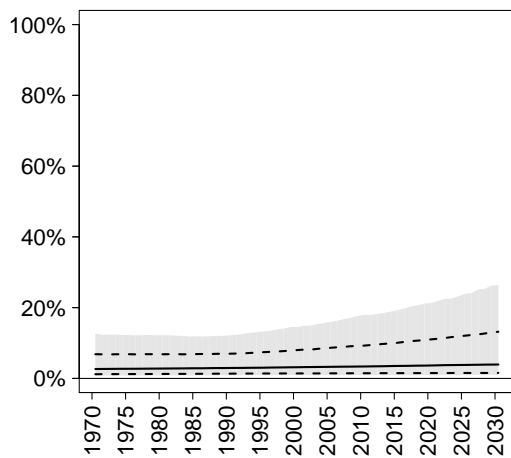

- DHS
- MICS
- Other international survey
- National survey
- PMA
- Subpopulation
- +: Higher contraceptive use
- : Lower contraceptive use
- A: Other age group
- F: Folk methods included
- S-: Sterilization included
- S+: Sterilization excluded
- Unmarried women
- ▽ Formerly married
- ◻ Partnered women
- ◇ CP (any) ≤ 1%

Turkey (Western Asia, SA Group 0) --- Unmarried / Not In-Union

CP (any)

CP (modern)

CP (traditional)

Unmet need among all unmarried women

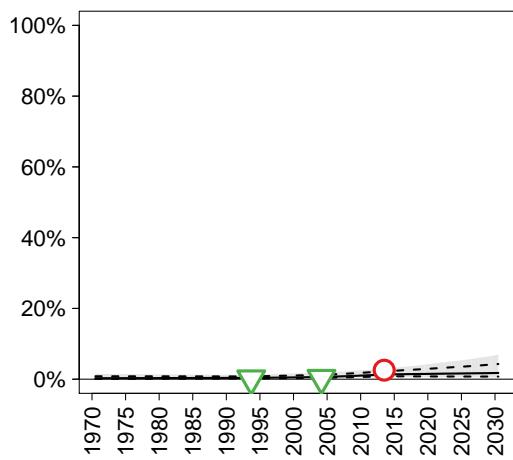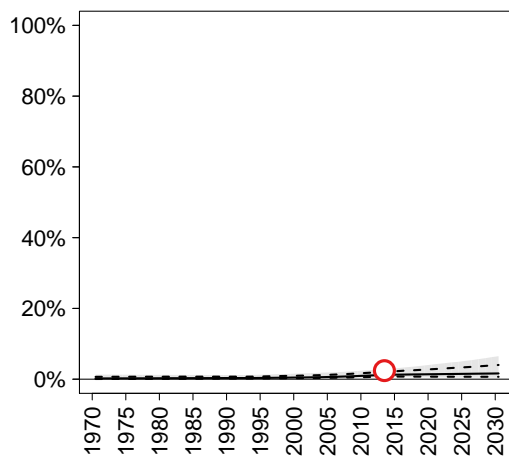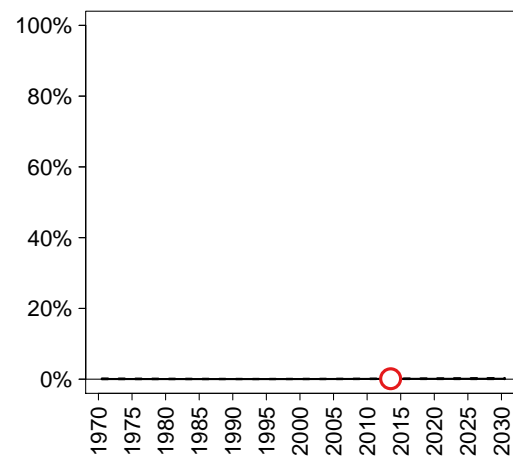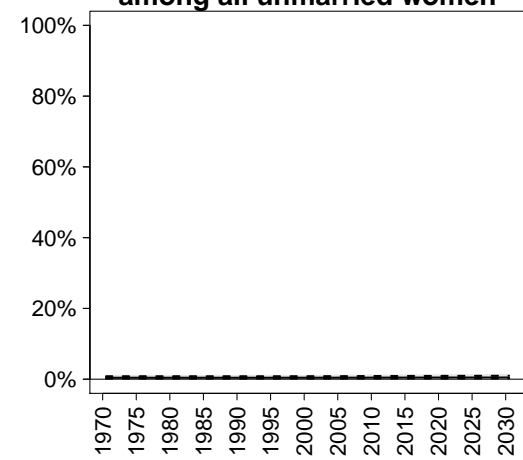

Total demand

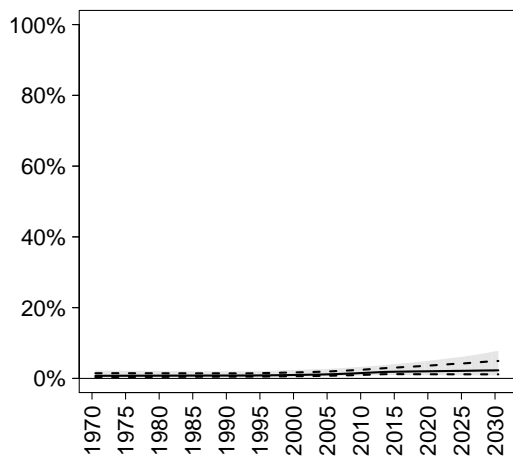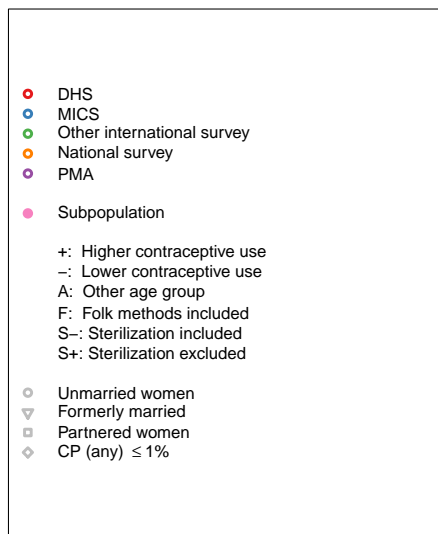

Turkmenistan (Central Asia, SA Group 0) --- Unmarried / Not In-Union

CP (any)

CP (modern)

CP (traditional)

Unmet need among all unmarried women

Total demand

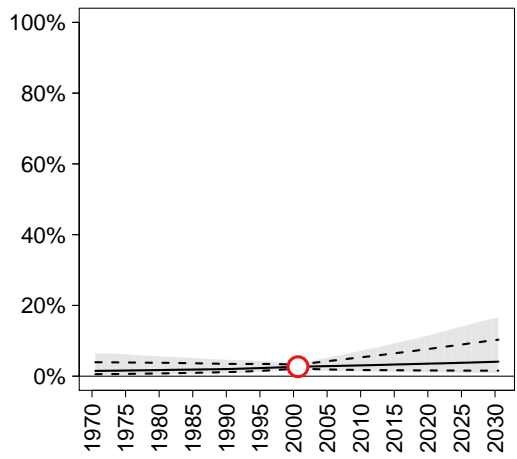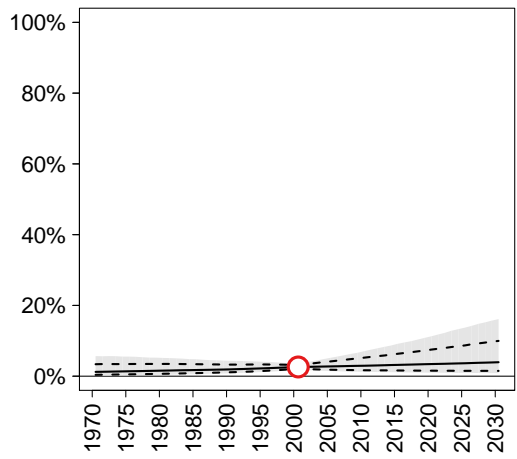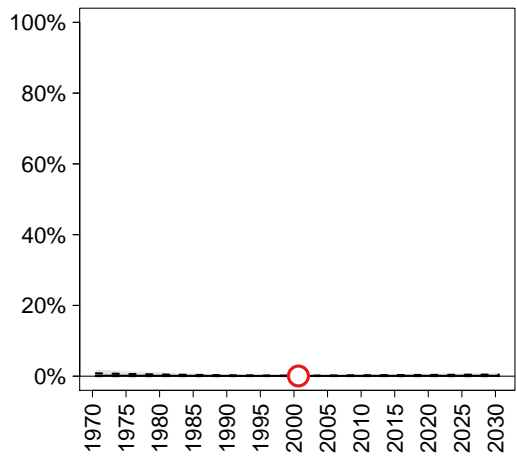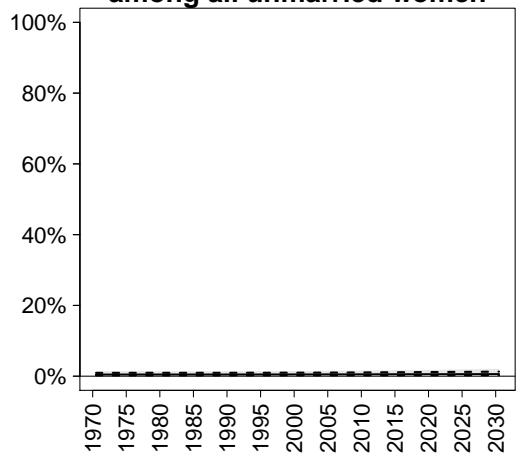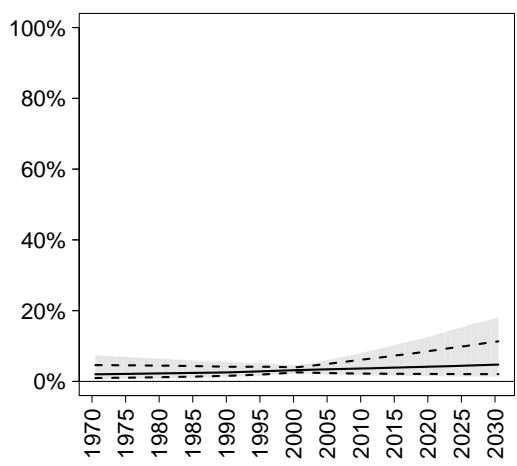

Uganda (Eastern Africa, SA Group 1) --- Unmarried / Not In-Union

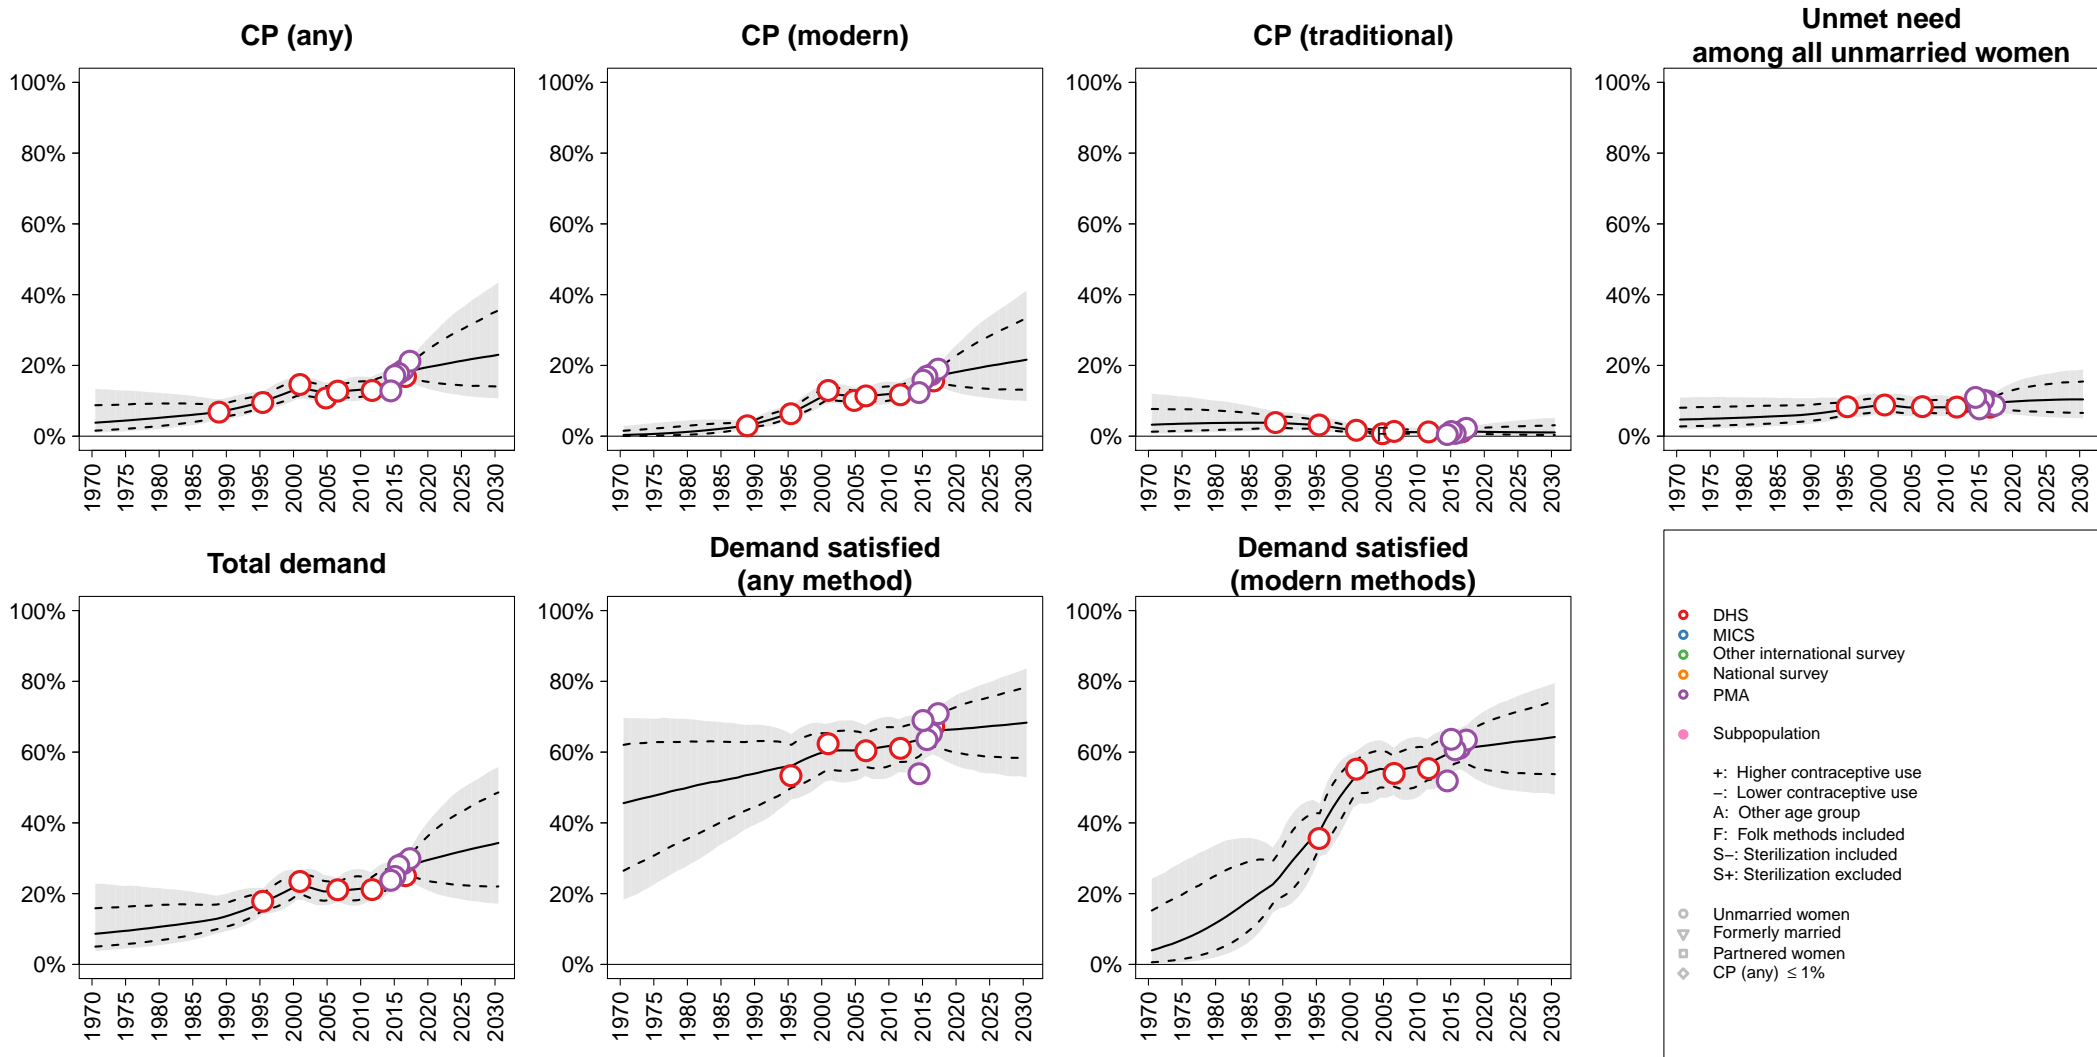

Ukraine (Eastern Europe, SA Group 1) --- Unmarried / Not In-Union

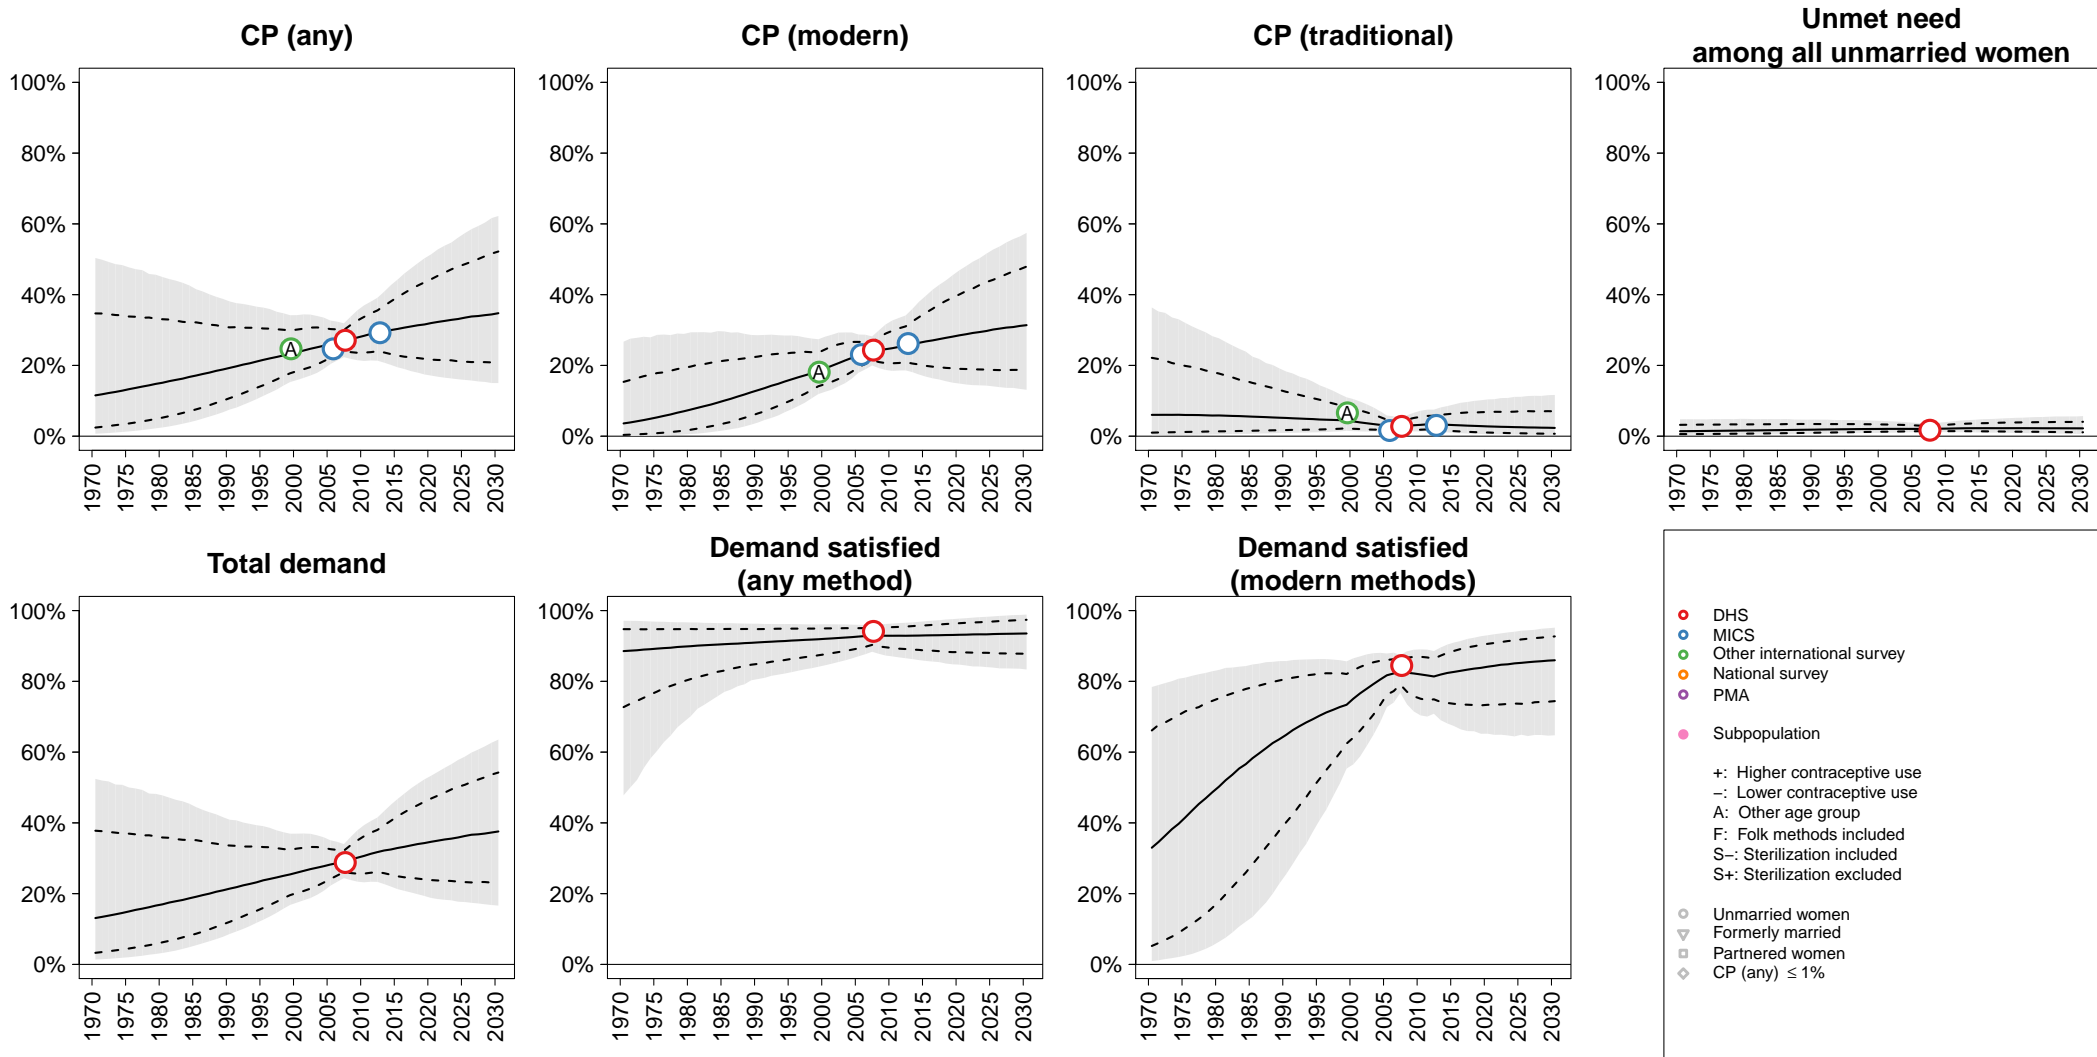



United Arab Emirates (Western Asia, SA Group 0) --- Unmarried / Not In-Union

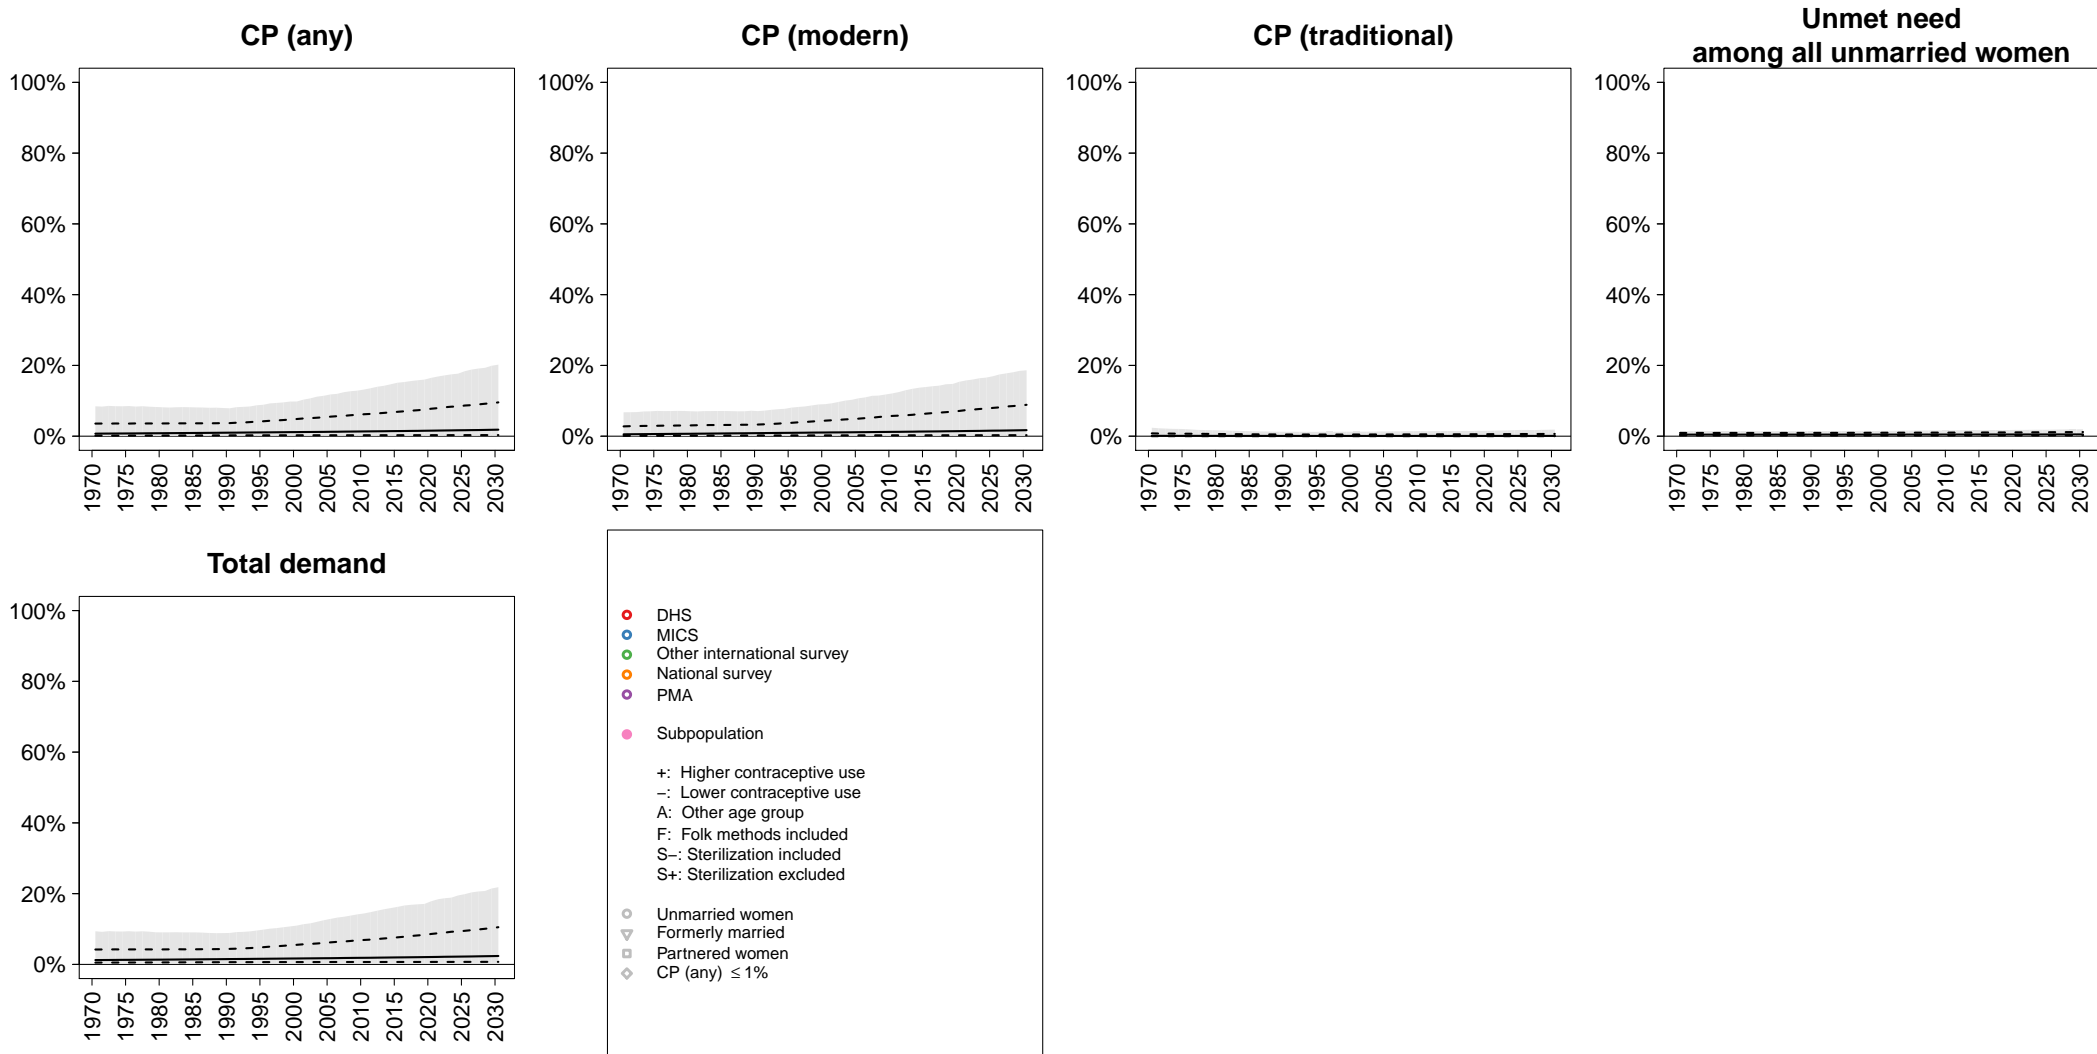

United Kingdom of Great Britain and Northern Ireland (Northern Europe, SA Group 1) --- Unmarried / Not In-Union

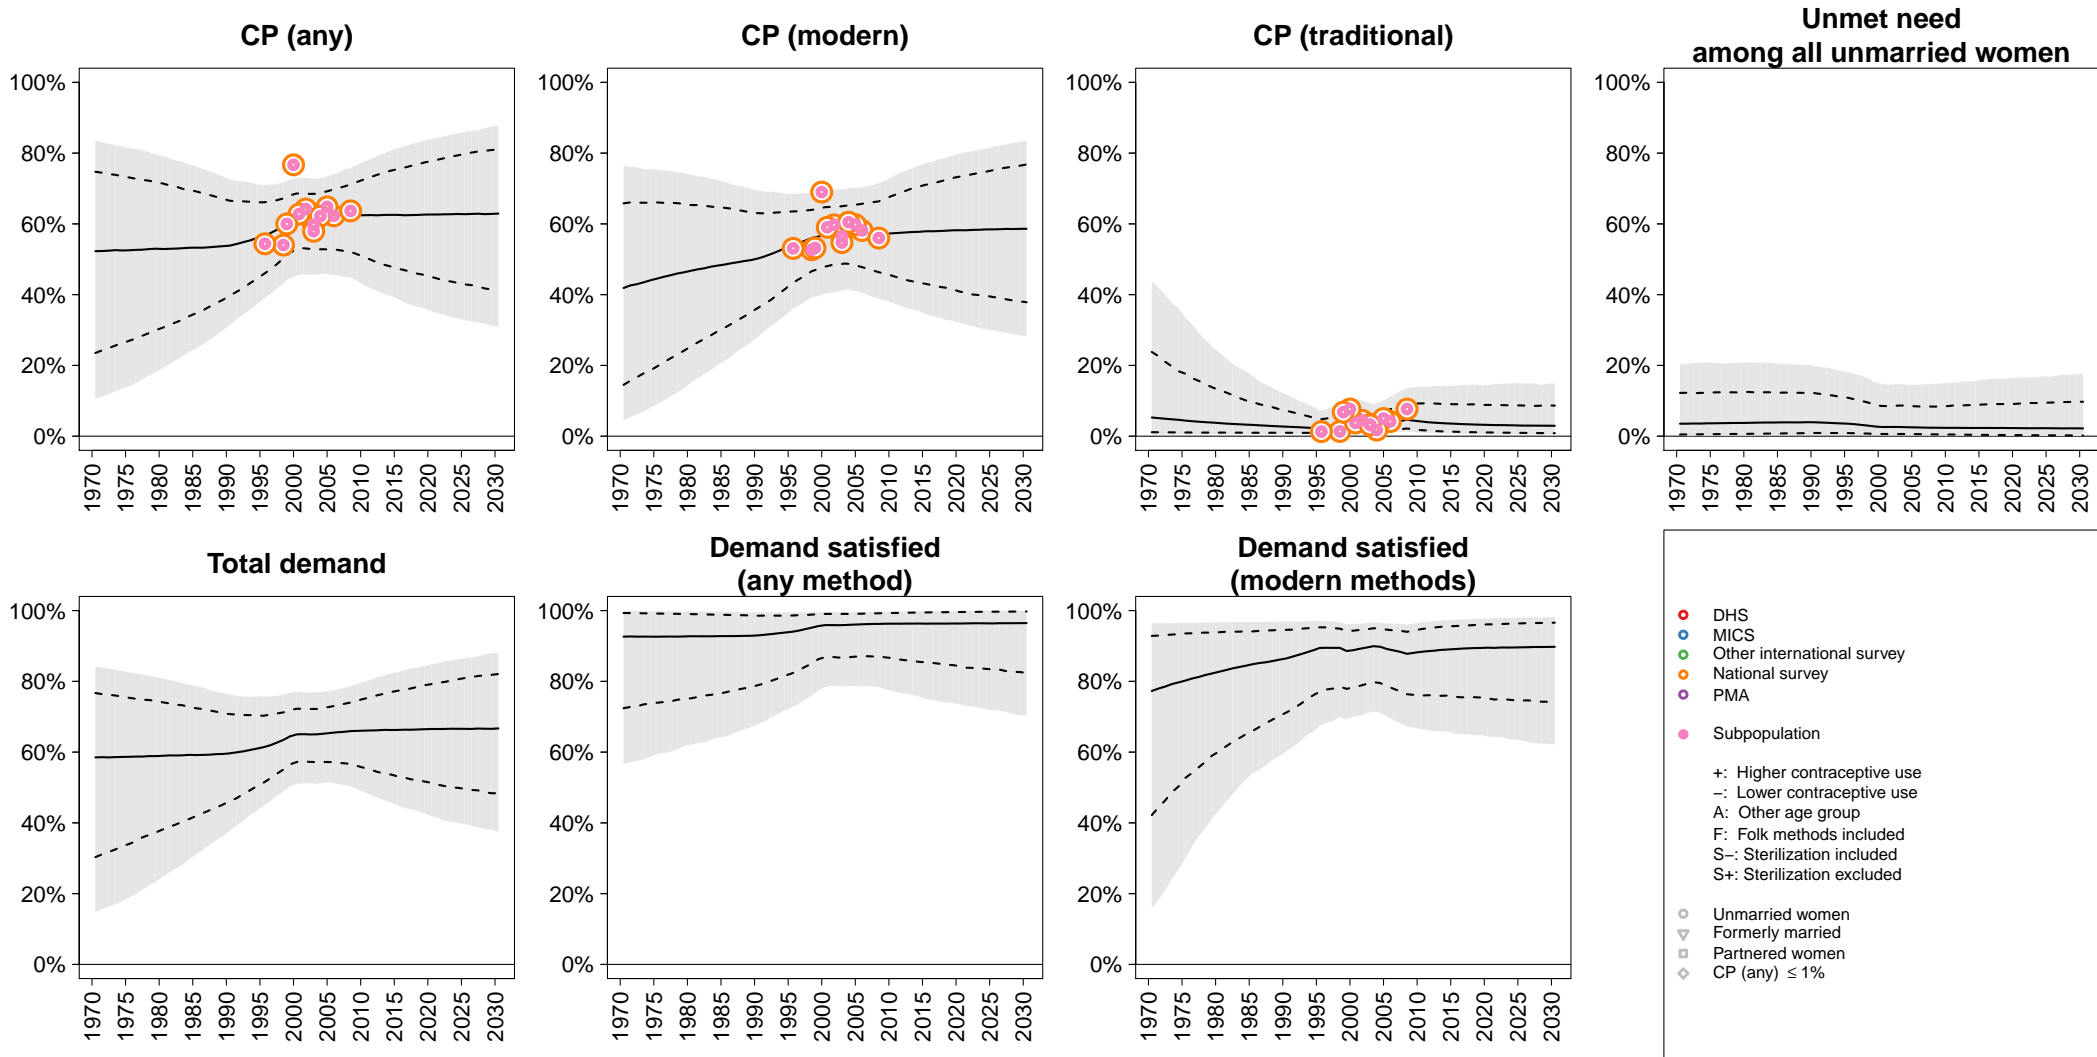

United Rep. of Tanzania (Eastern Africa, SA Group 1) --- Unmarried / Not In-Union

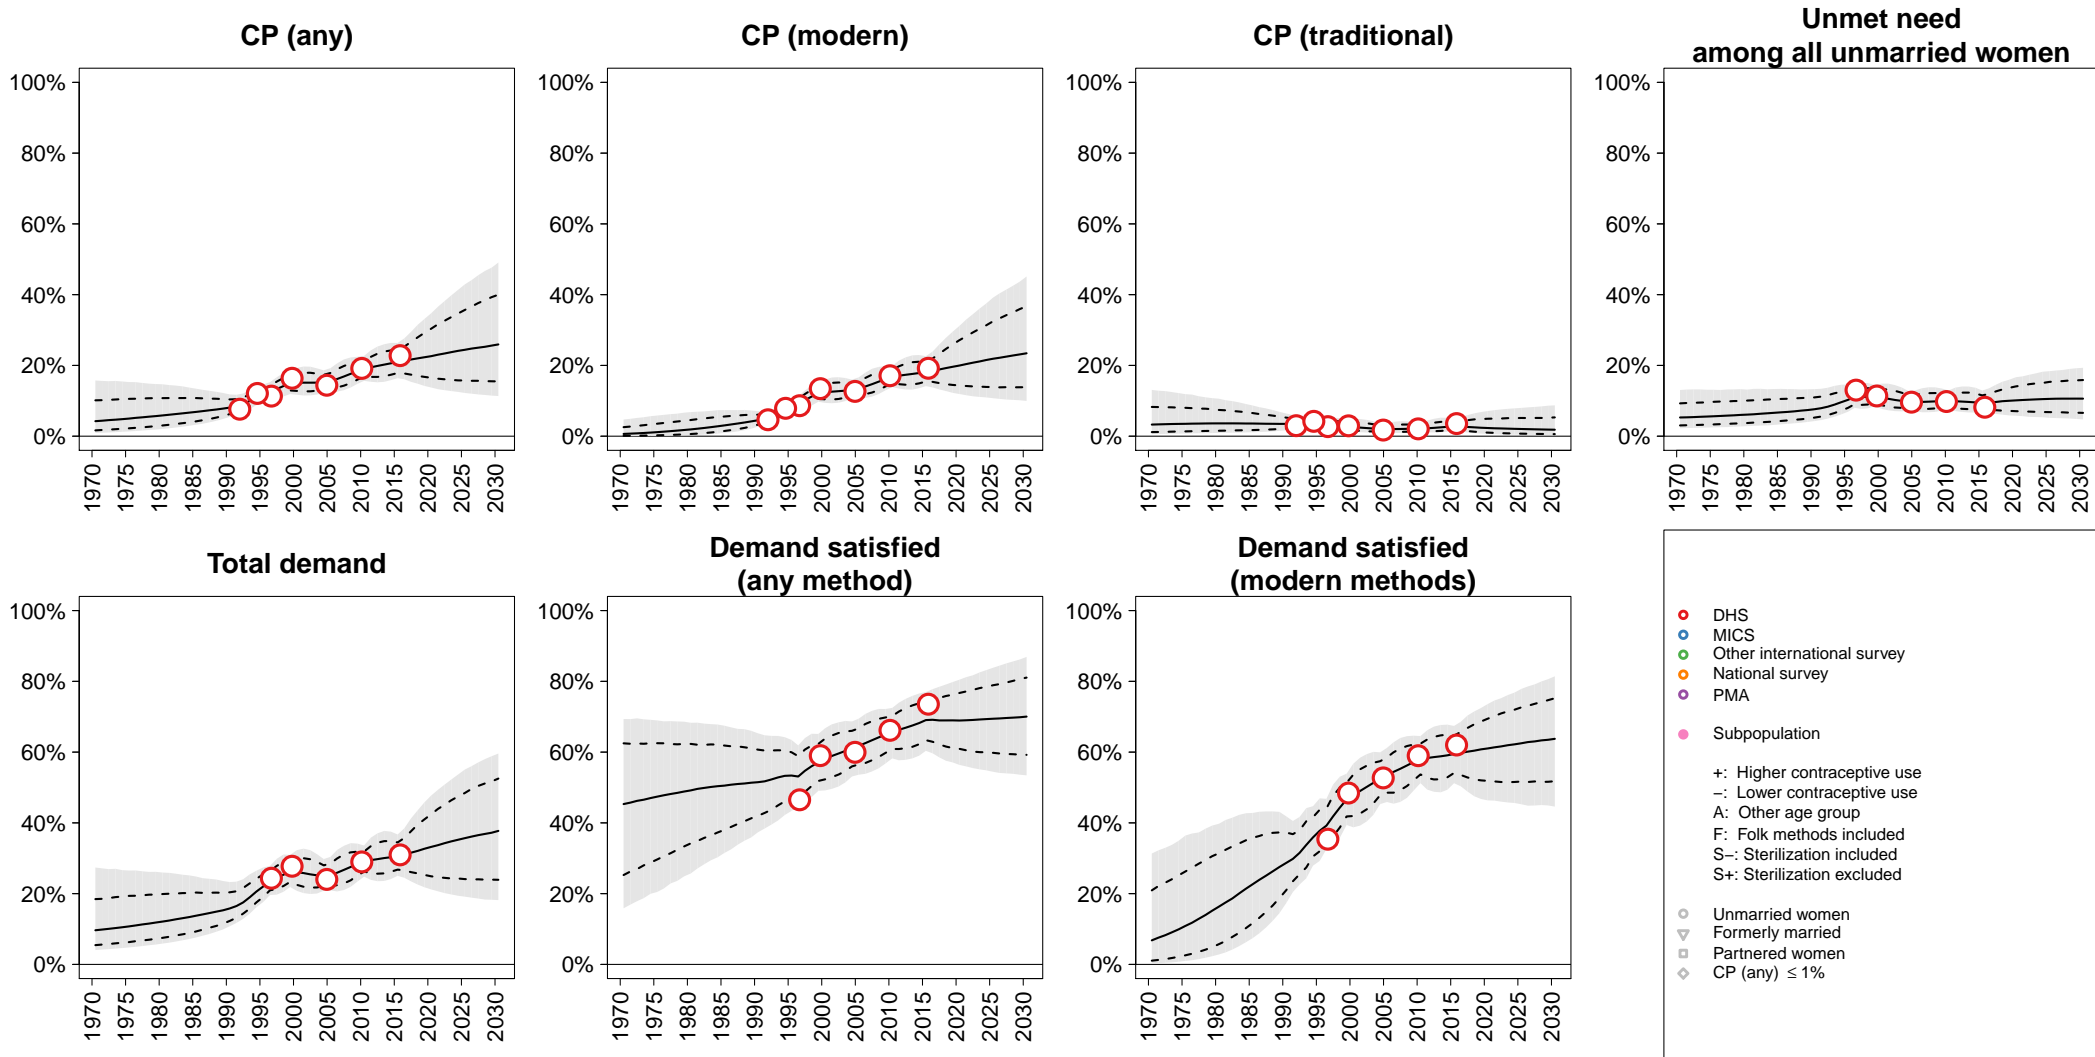

United States of America (Northern America, SA Group 1) --- Unmarried / Not In-Union

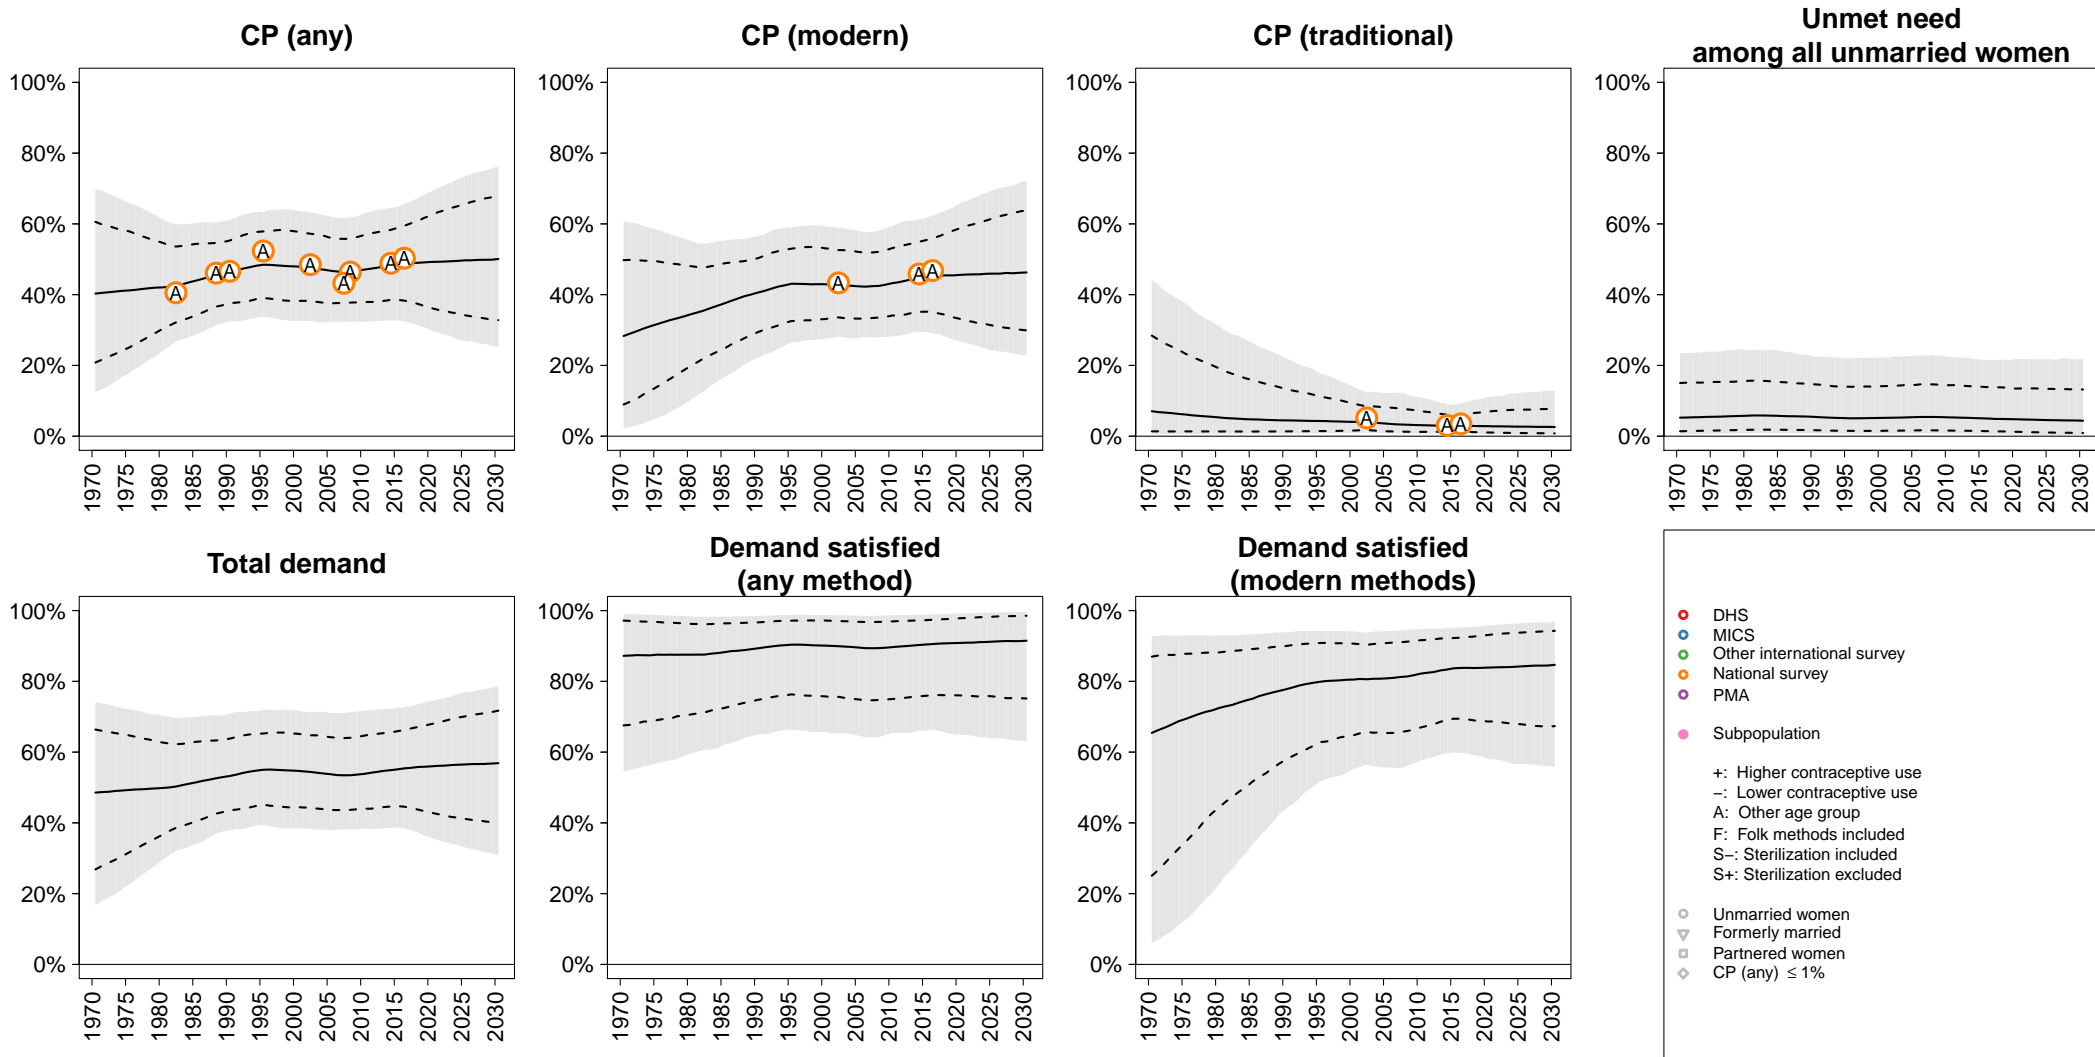

United States Virgin Islands (Caribbean, SA Group 1) --- Unmarried / Not In-Union

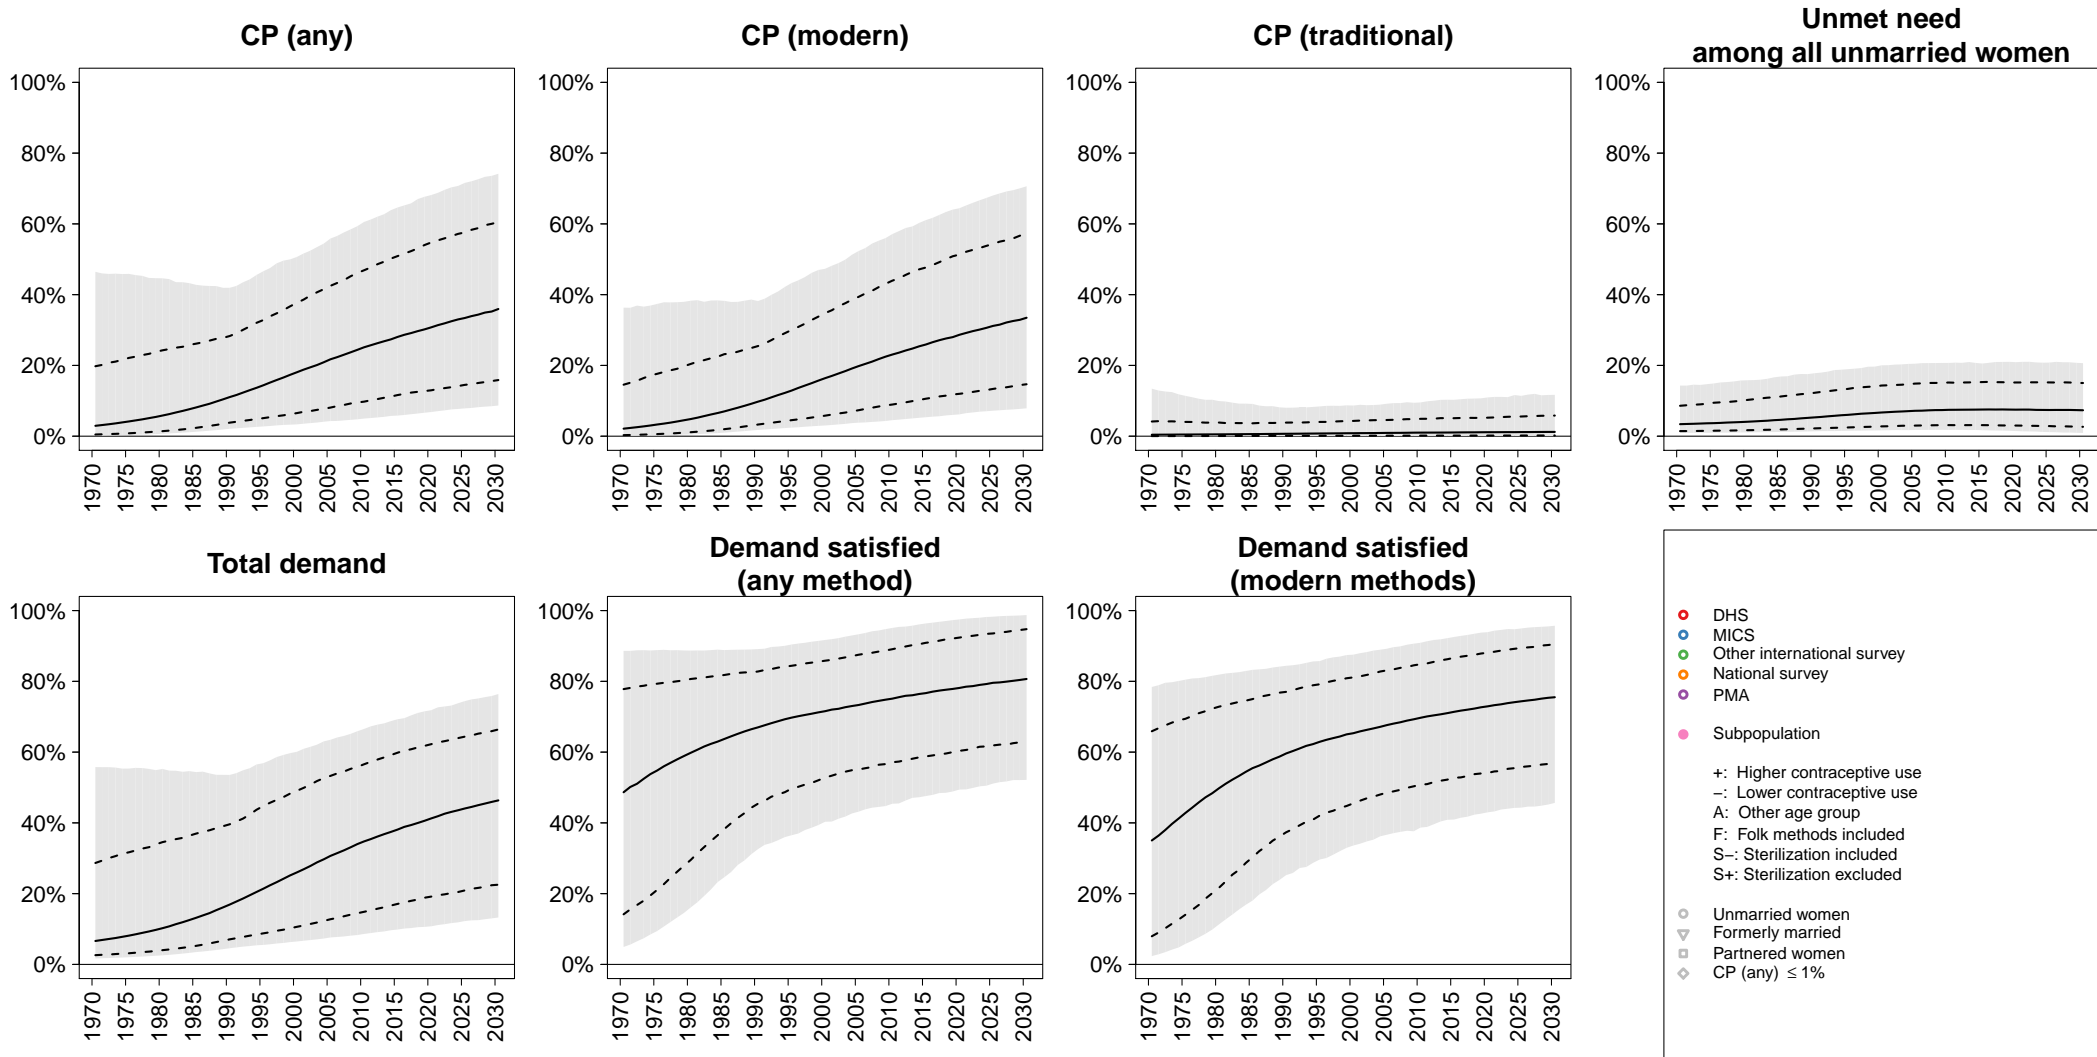

Uruguay (South America, SA Group 1) --- Unmarried / Not In-Union

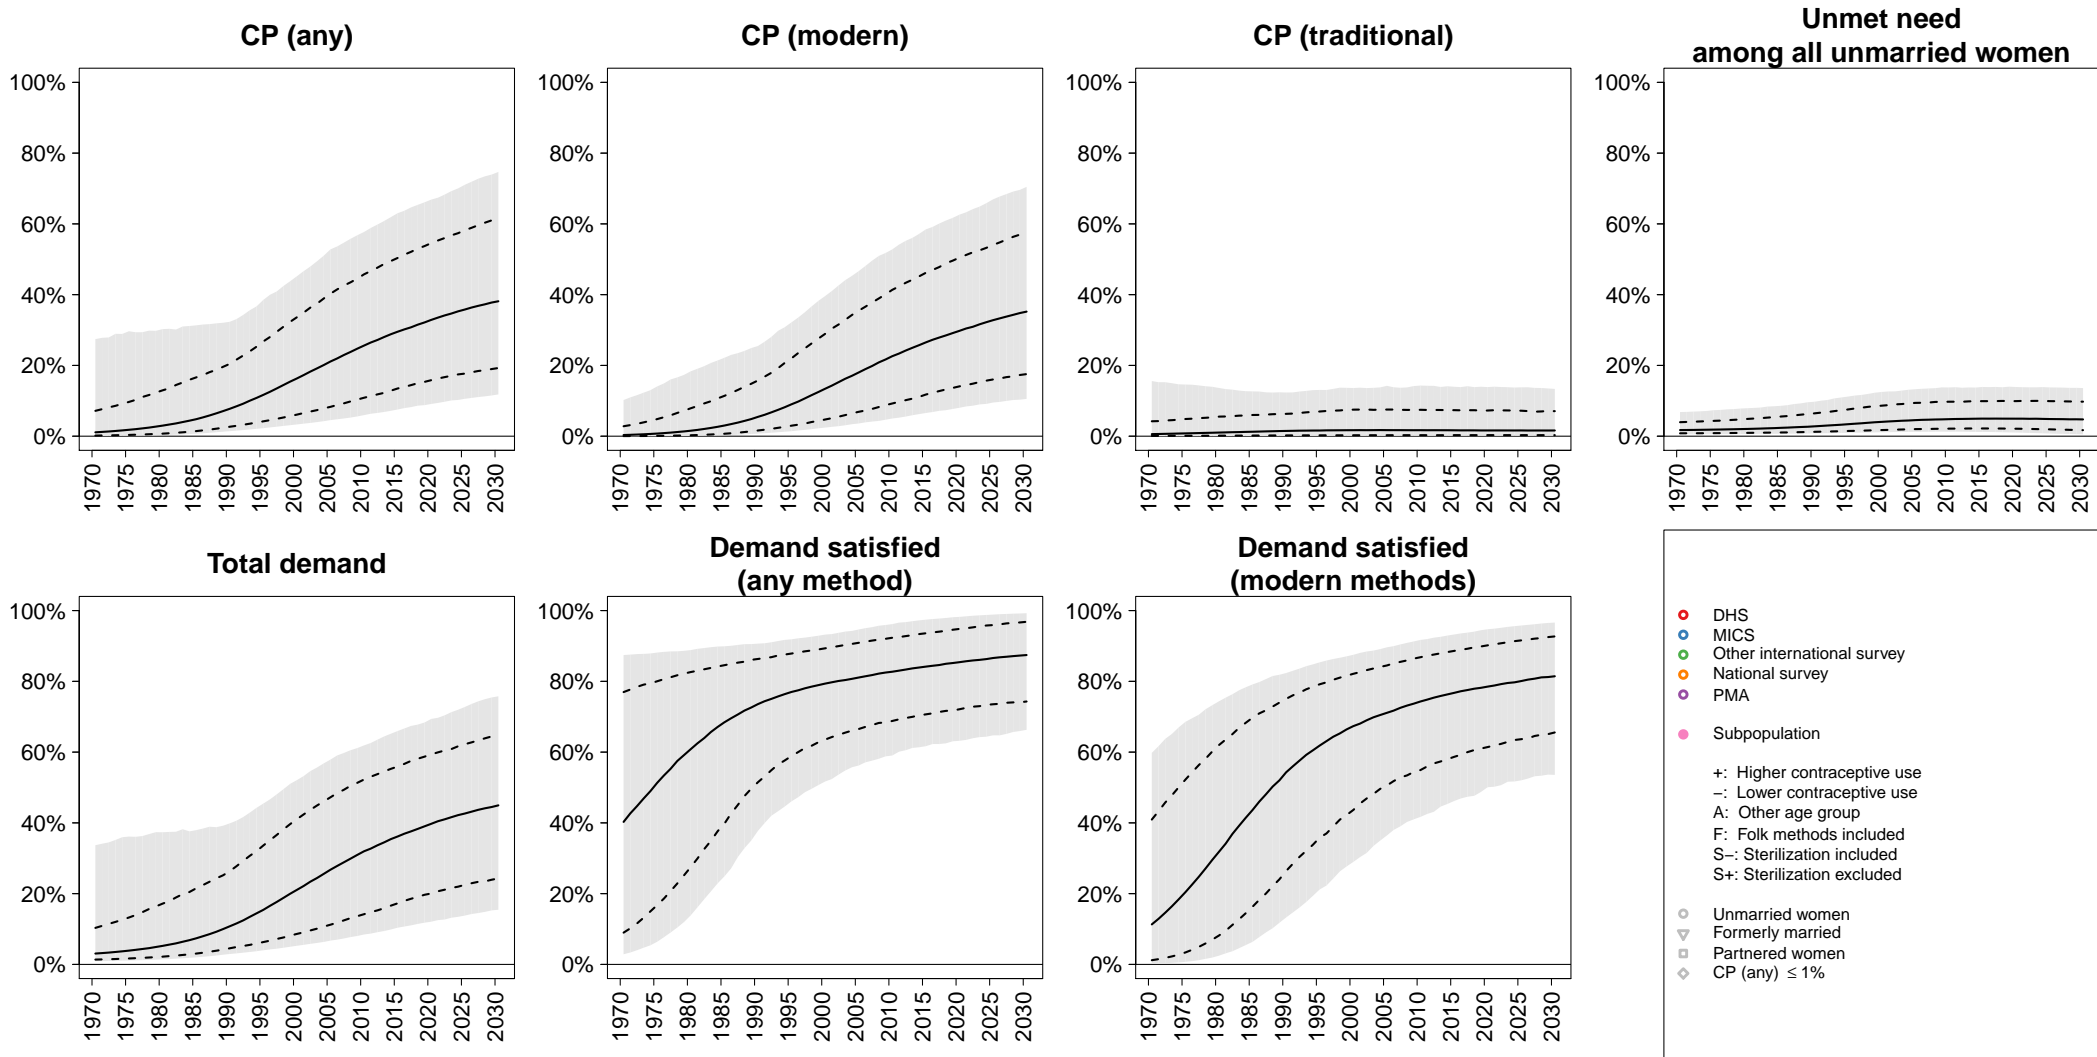

Uzbekistan (Central Asia, SA Group 0) --- Unmarried / Not In-Union

CP (any)

CP (modern)

CP (traditional)

Unmet need among all unmarried women

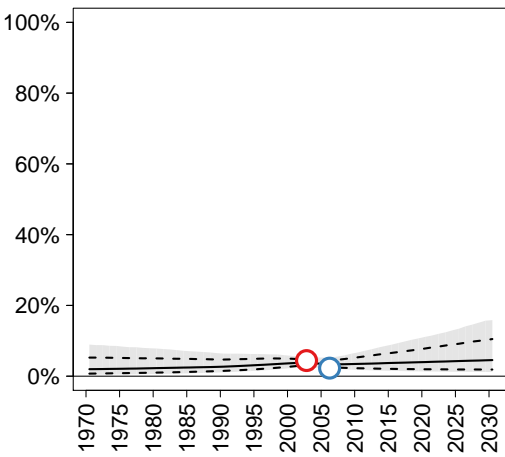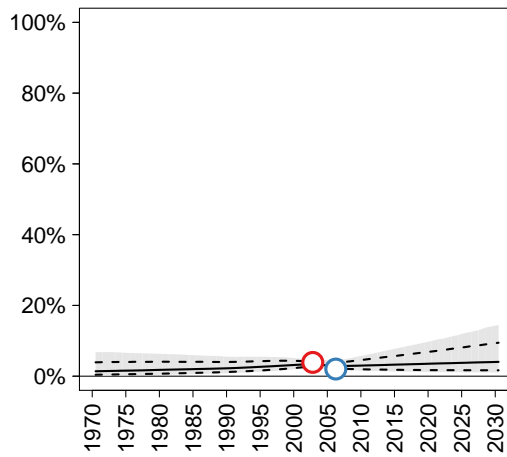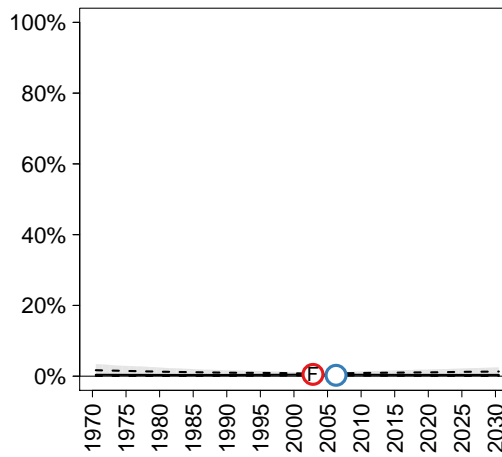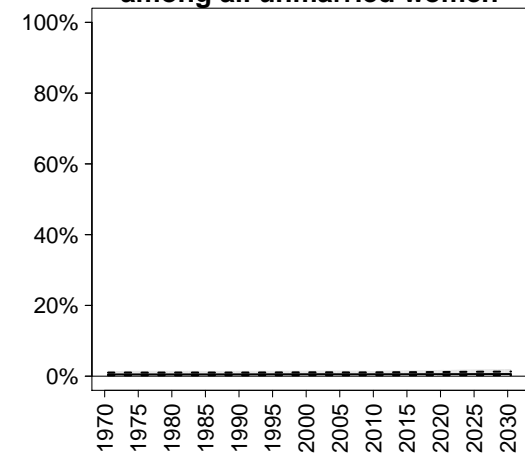

Total demand

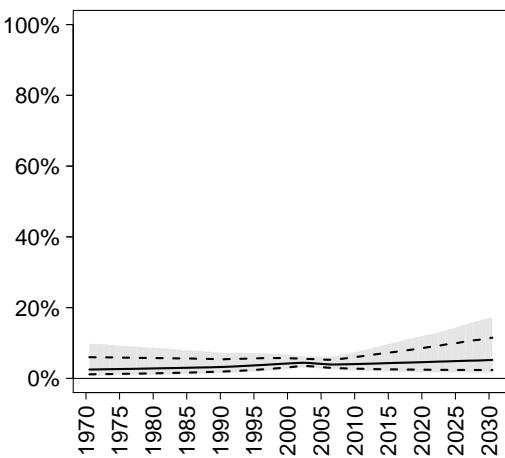

- DHS
- MICS
- Other international survey
- National survey
- PMA
- Subpopulation
- + : Higher contraceptive use
- : Lower contraceptive use
- A : Other age group
- F : Folk methods included
- S- : Sterilization included
- S+ : Sterilization excluded
- Unmarried women
- ▽ Formerly married
- ◻ Partnered women
- ◇ CP (any) ≤ 1%

Vanuatu (Melanesia, SA Group 1) --- Unmarried / Not In-Union

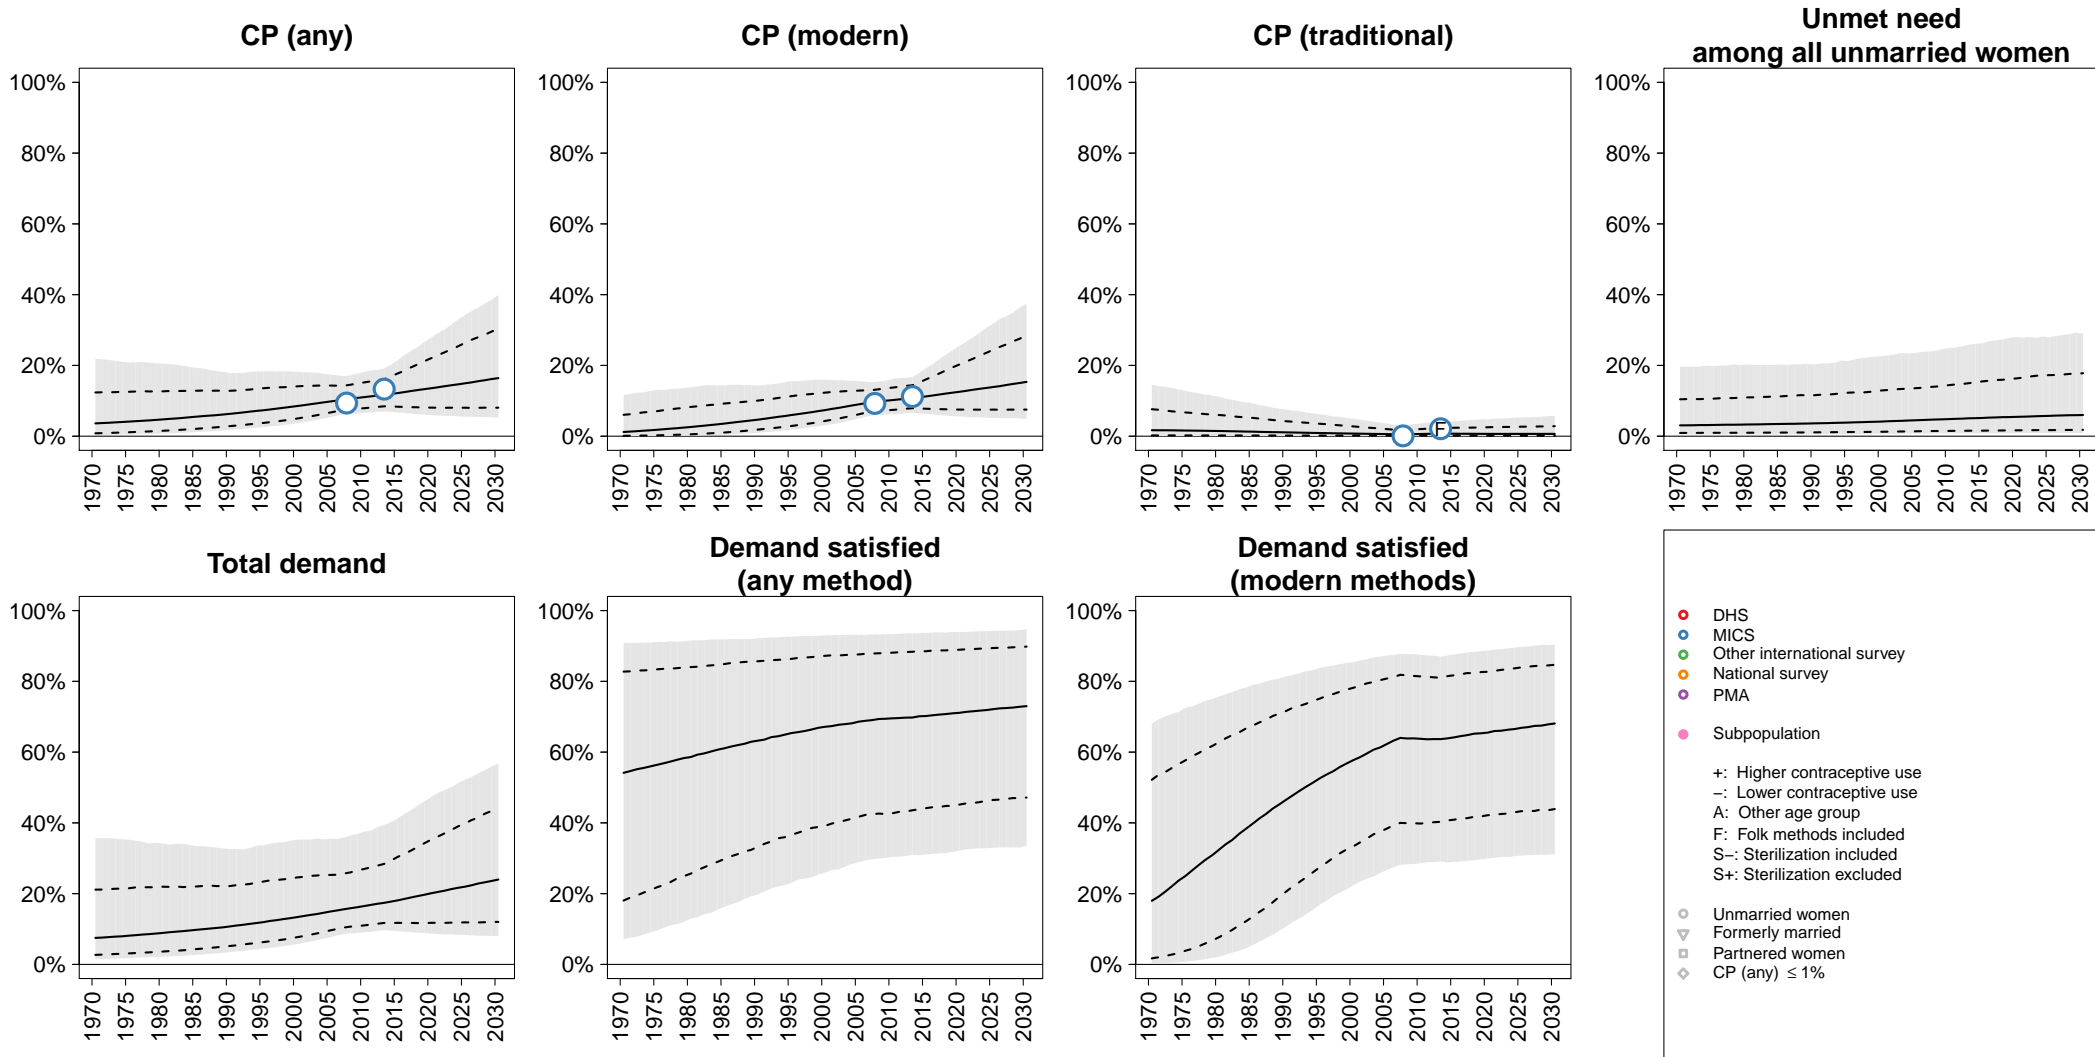



Venezuela, Bolivarian Republic of (South America, SA Group 1) --- Unmarried / Not In-Union

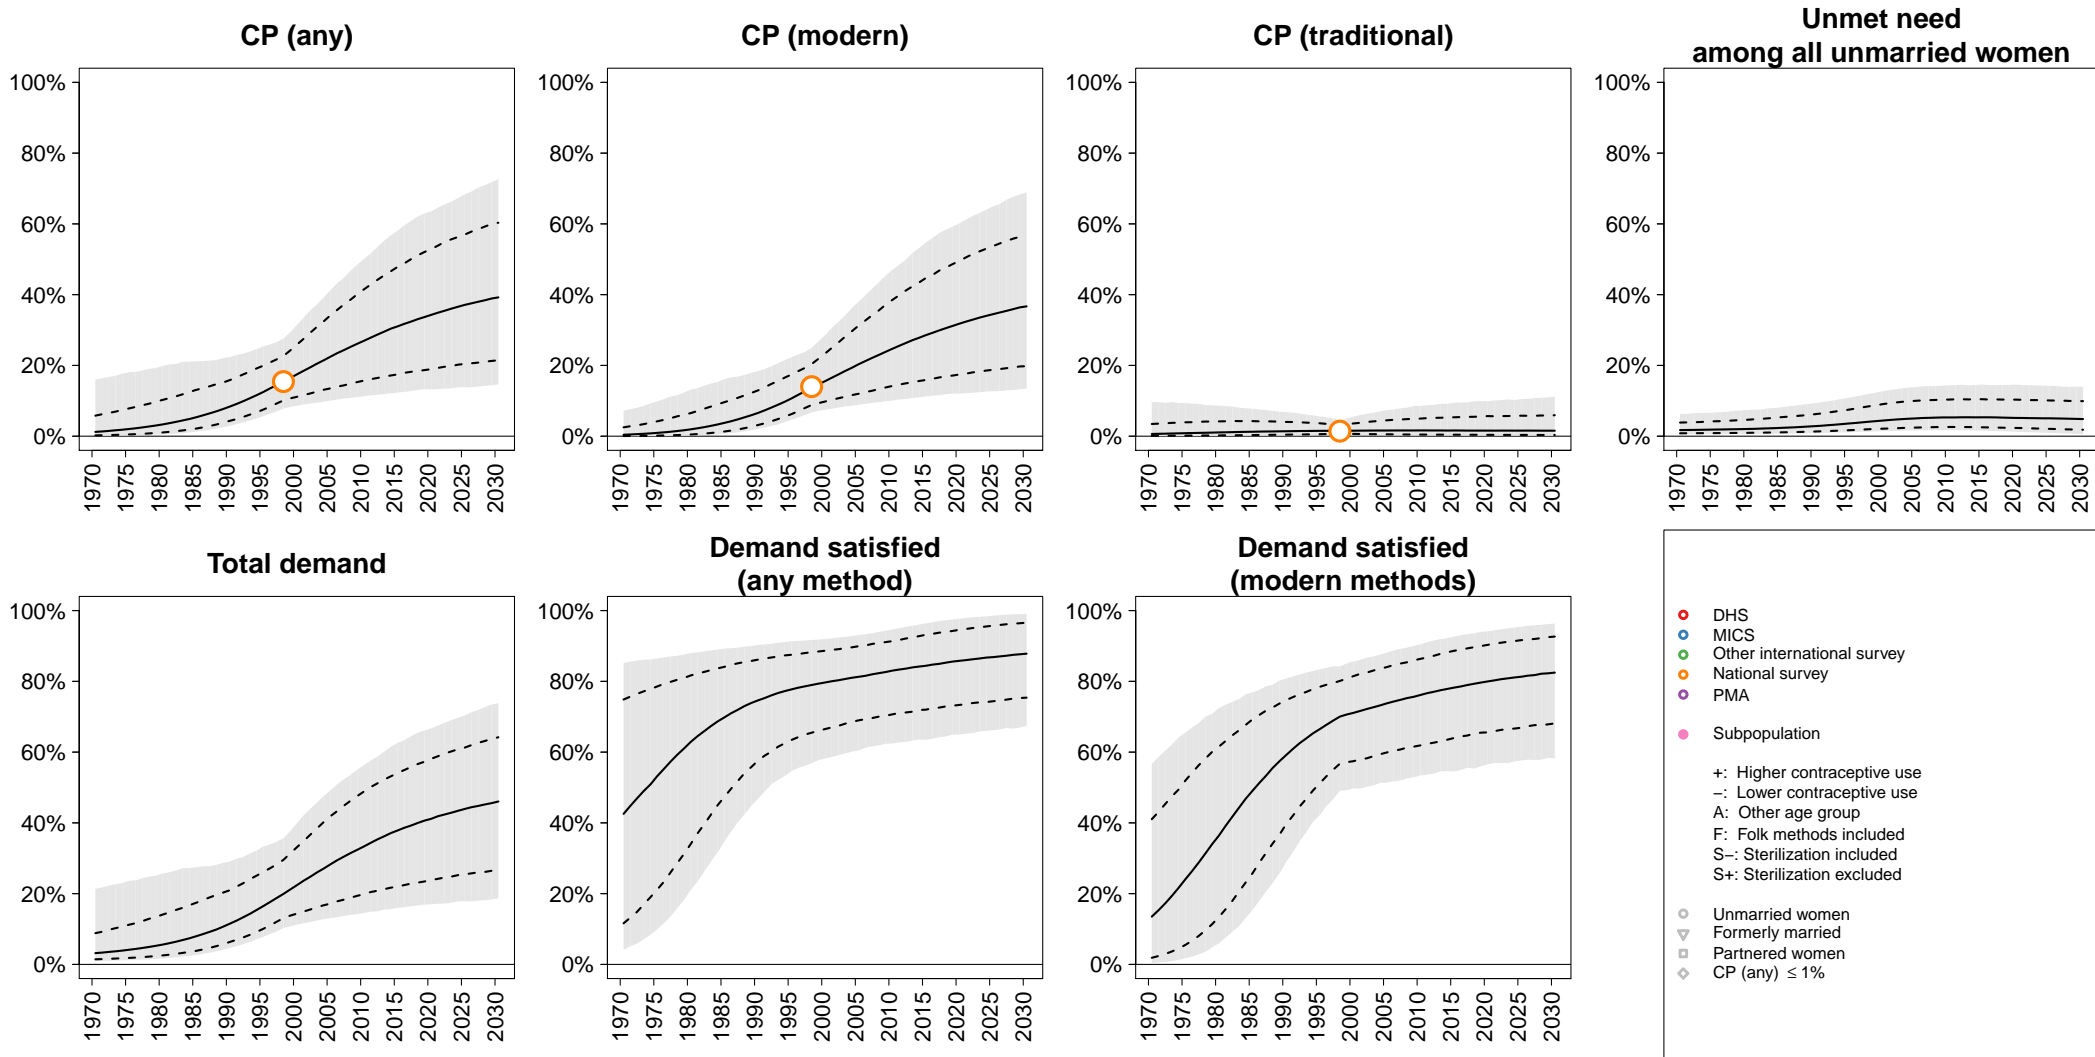

Viet Nam (South-eastern Asia, SA Group 0) --- Unmarried / Not In-Union

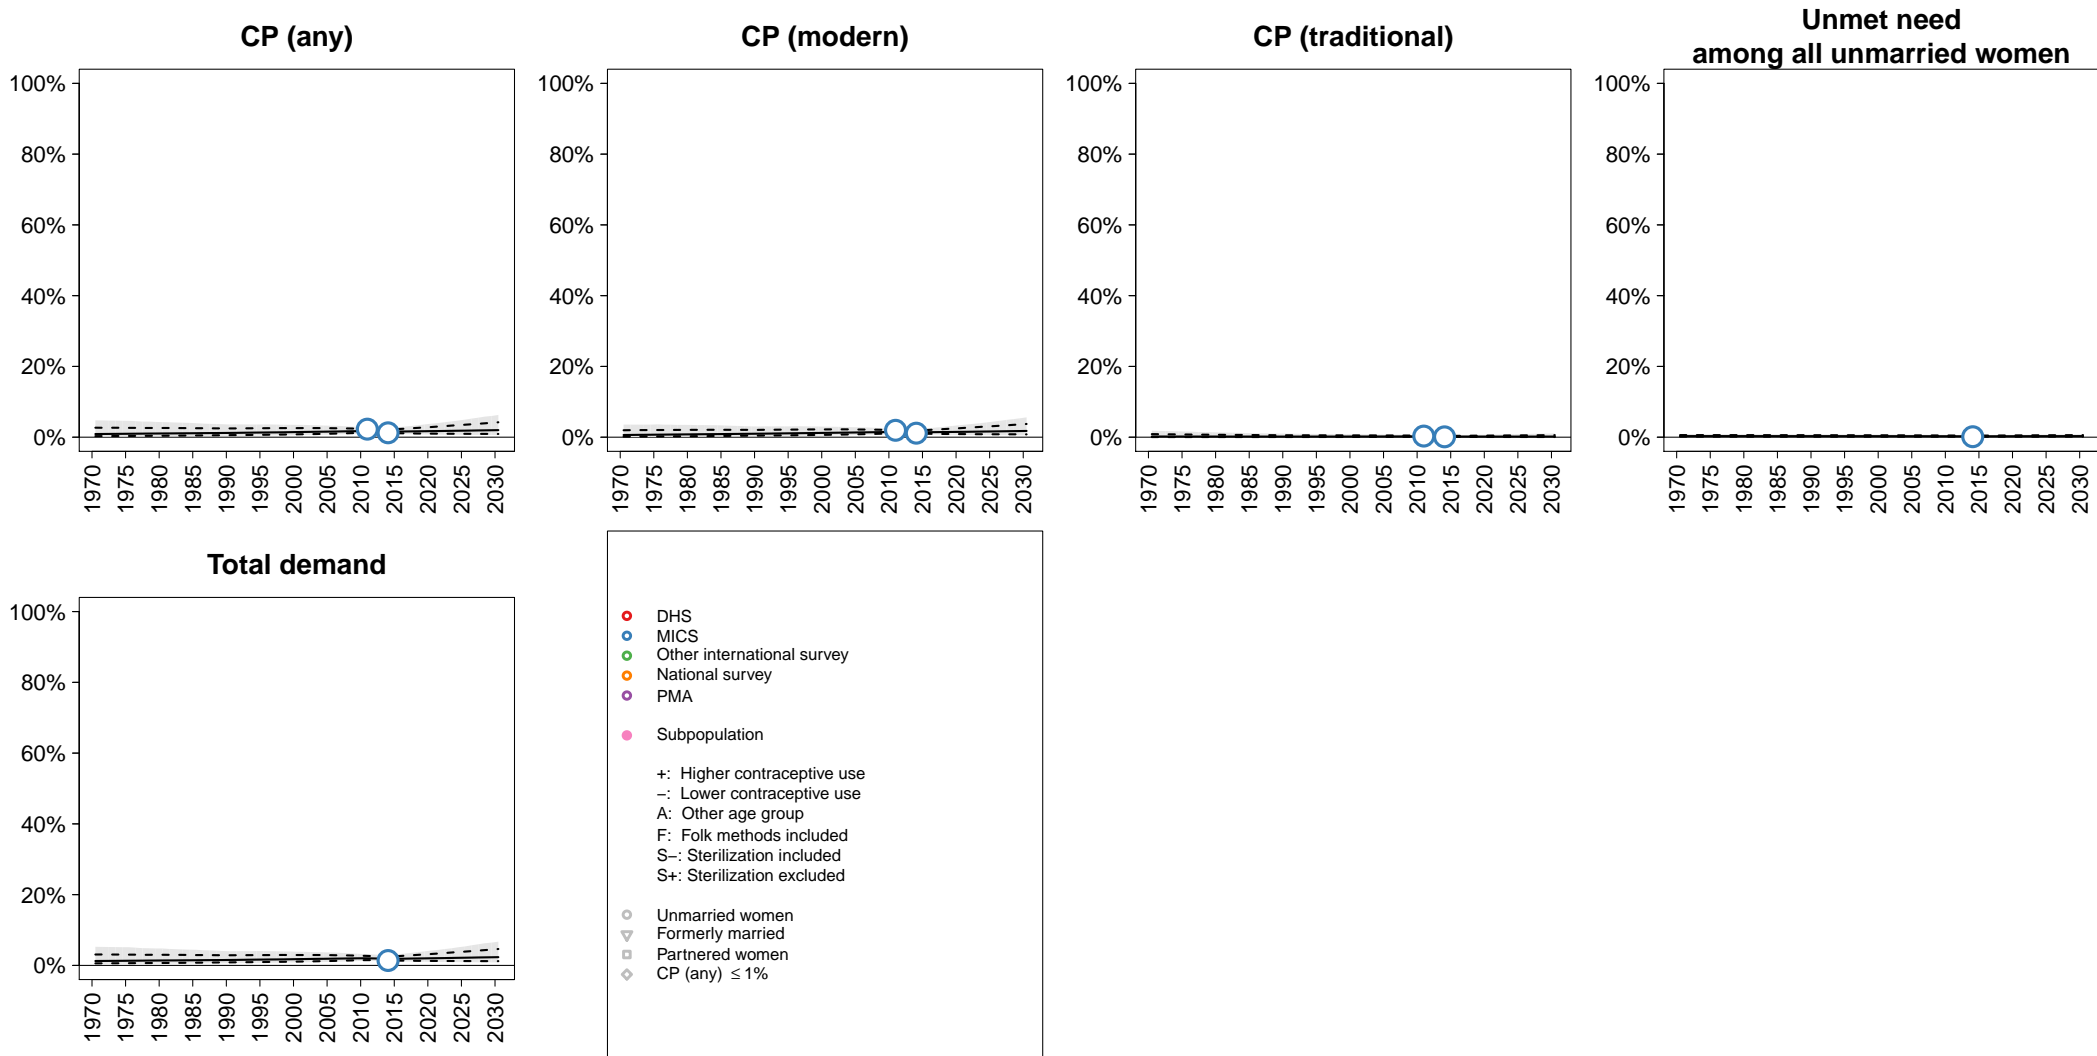

Yemen (Western Asia, SA Group 0) --- Unmarried / Not In-Union

CP (any)

CP (modern)

CP (traditional)

Unmet need among all unmarried women

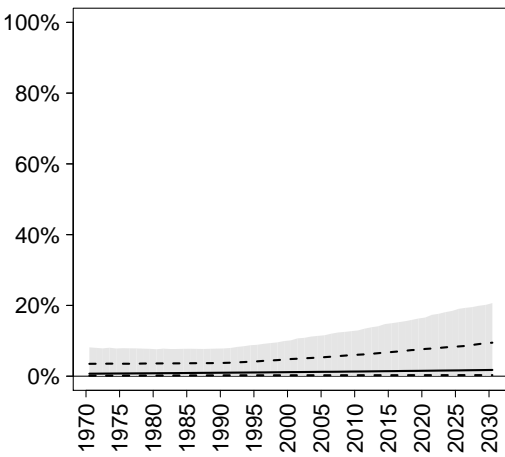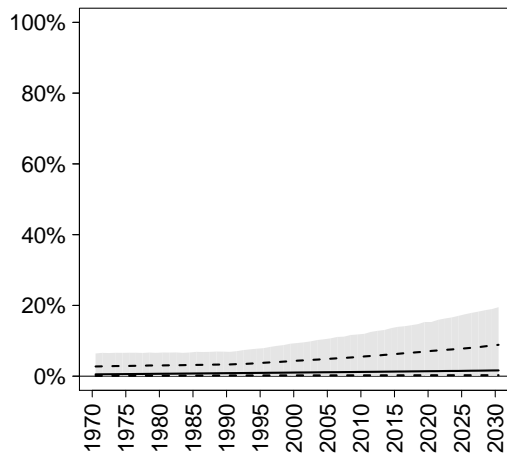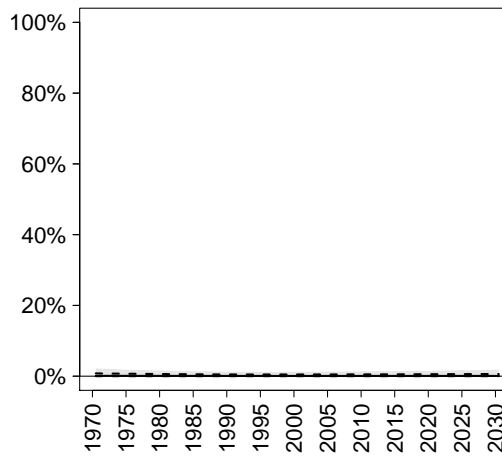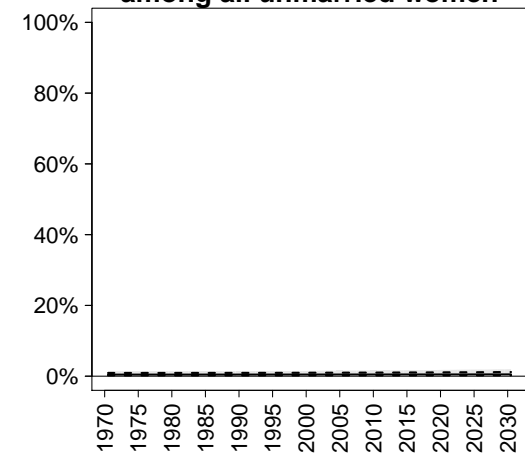

Total demand

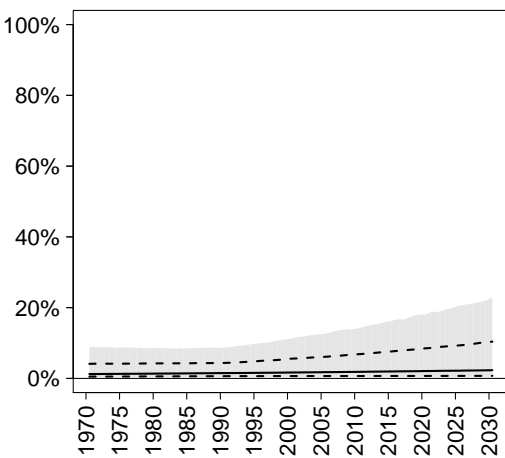

- DHS
- MICS
- Other international survey
- National survey
- PMA
- Subpopulation
- + : Higher contraceptive use
- : Lower contraceptive use
- A : Other age group
- F : Folk methods included
- S- : Sterilization included
- S+ : Sterilization excluded
- Unmarried women
- ▽ Formerly married
- ◻ Partnered women
- ◇ CP (any) ≤ 1%

Zambia (Eastern Africa, SA Group 1) --- Unmarried / Not In-Union

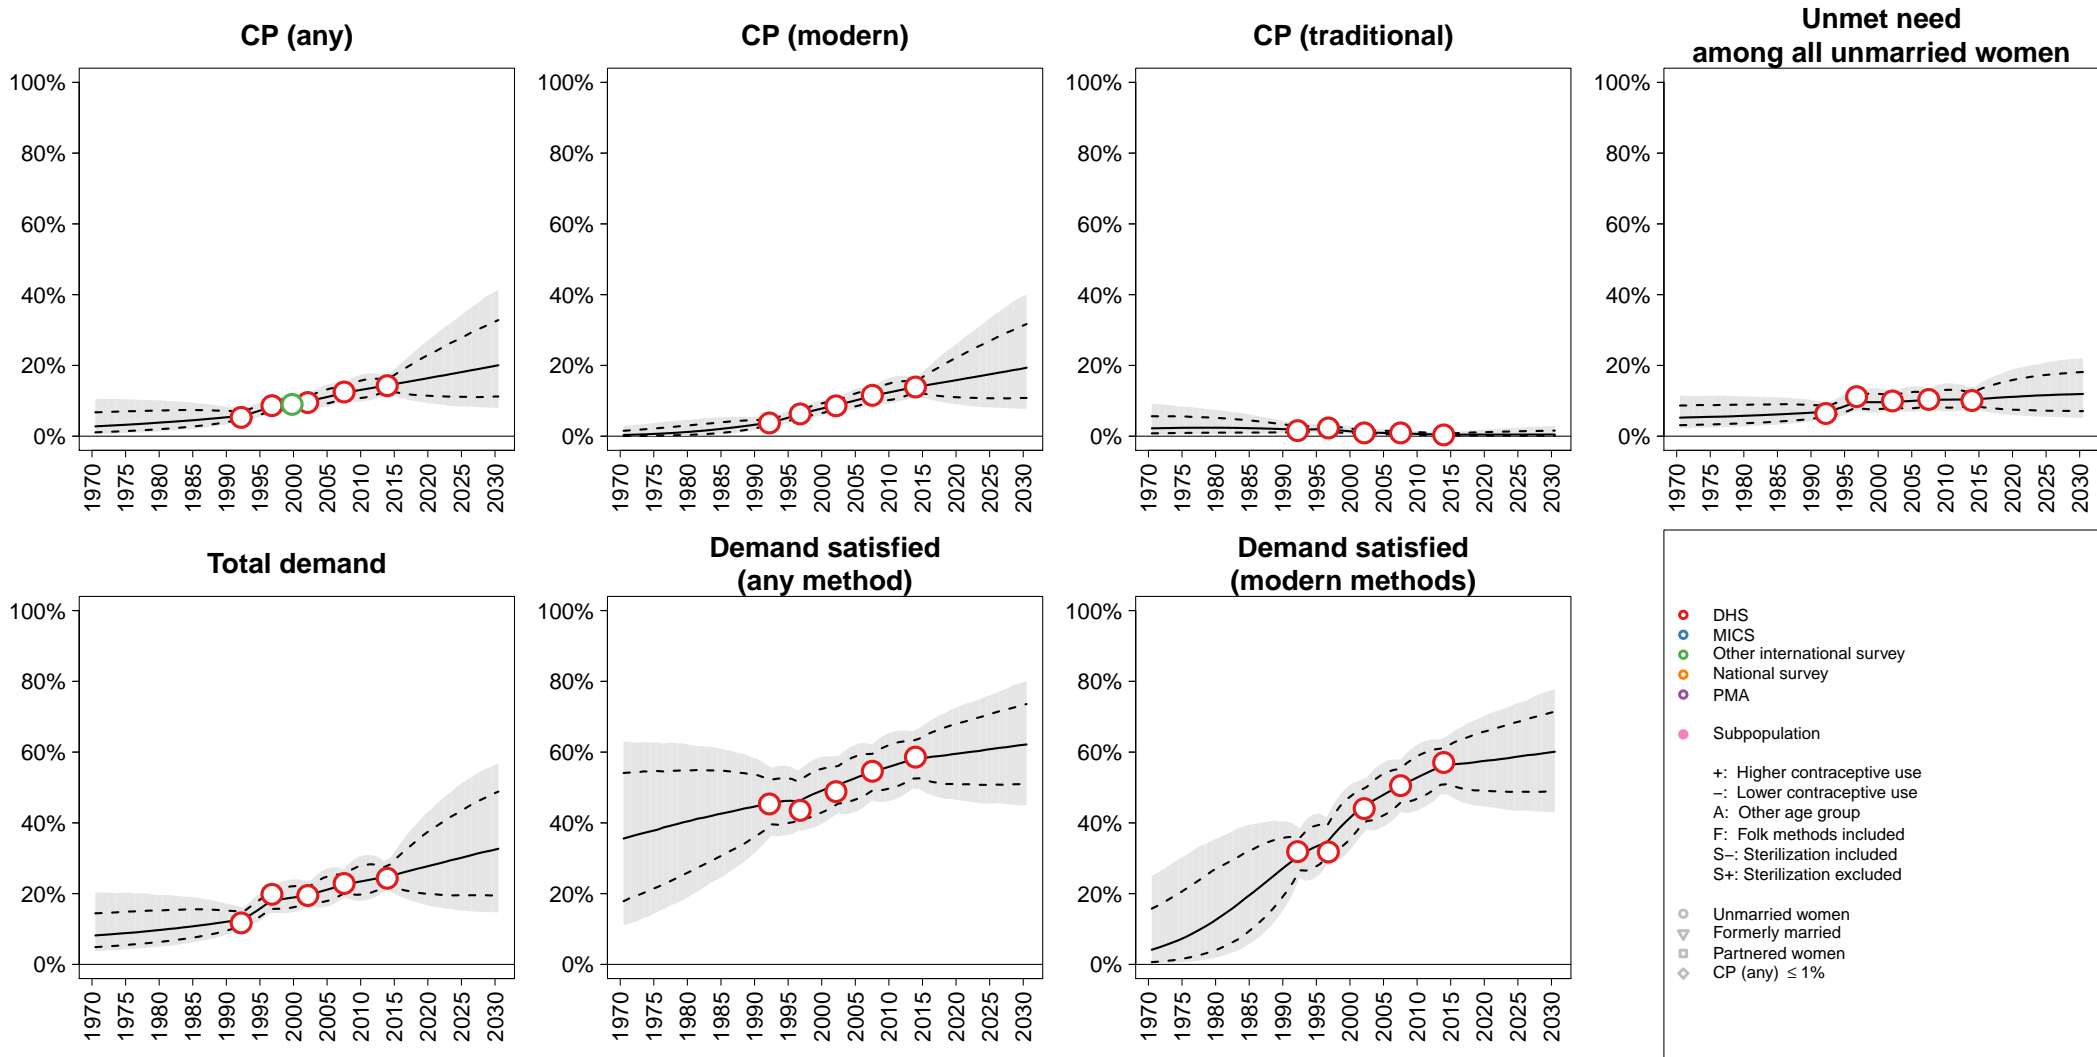

Zimbabwe (Eastern Africa, SA Group 1) --- Unmarried / Not In-Union

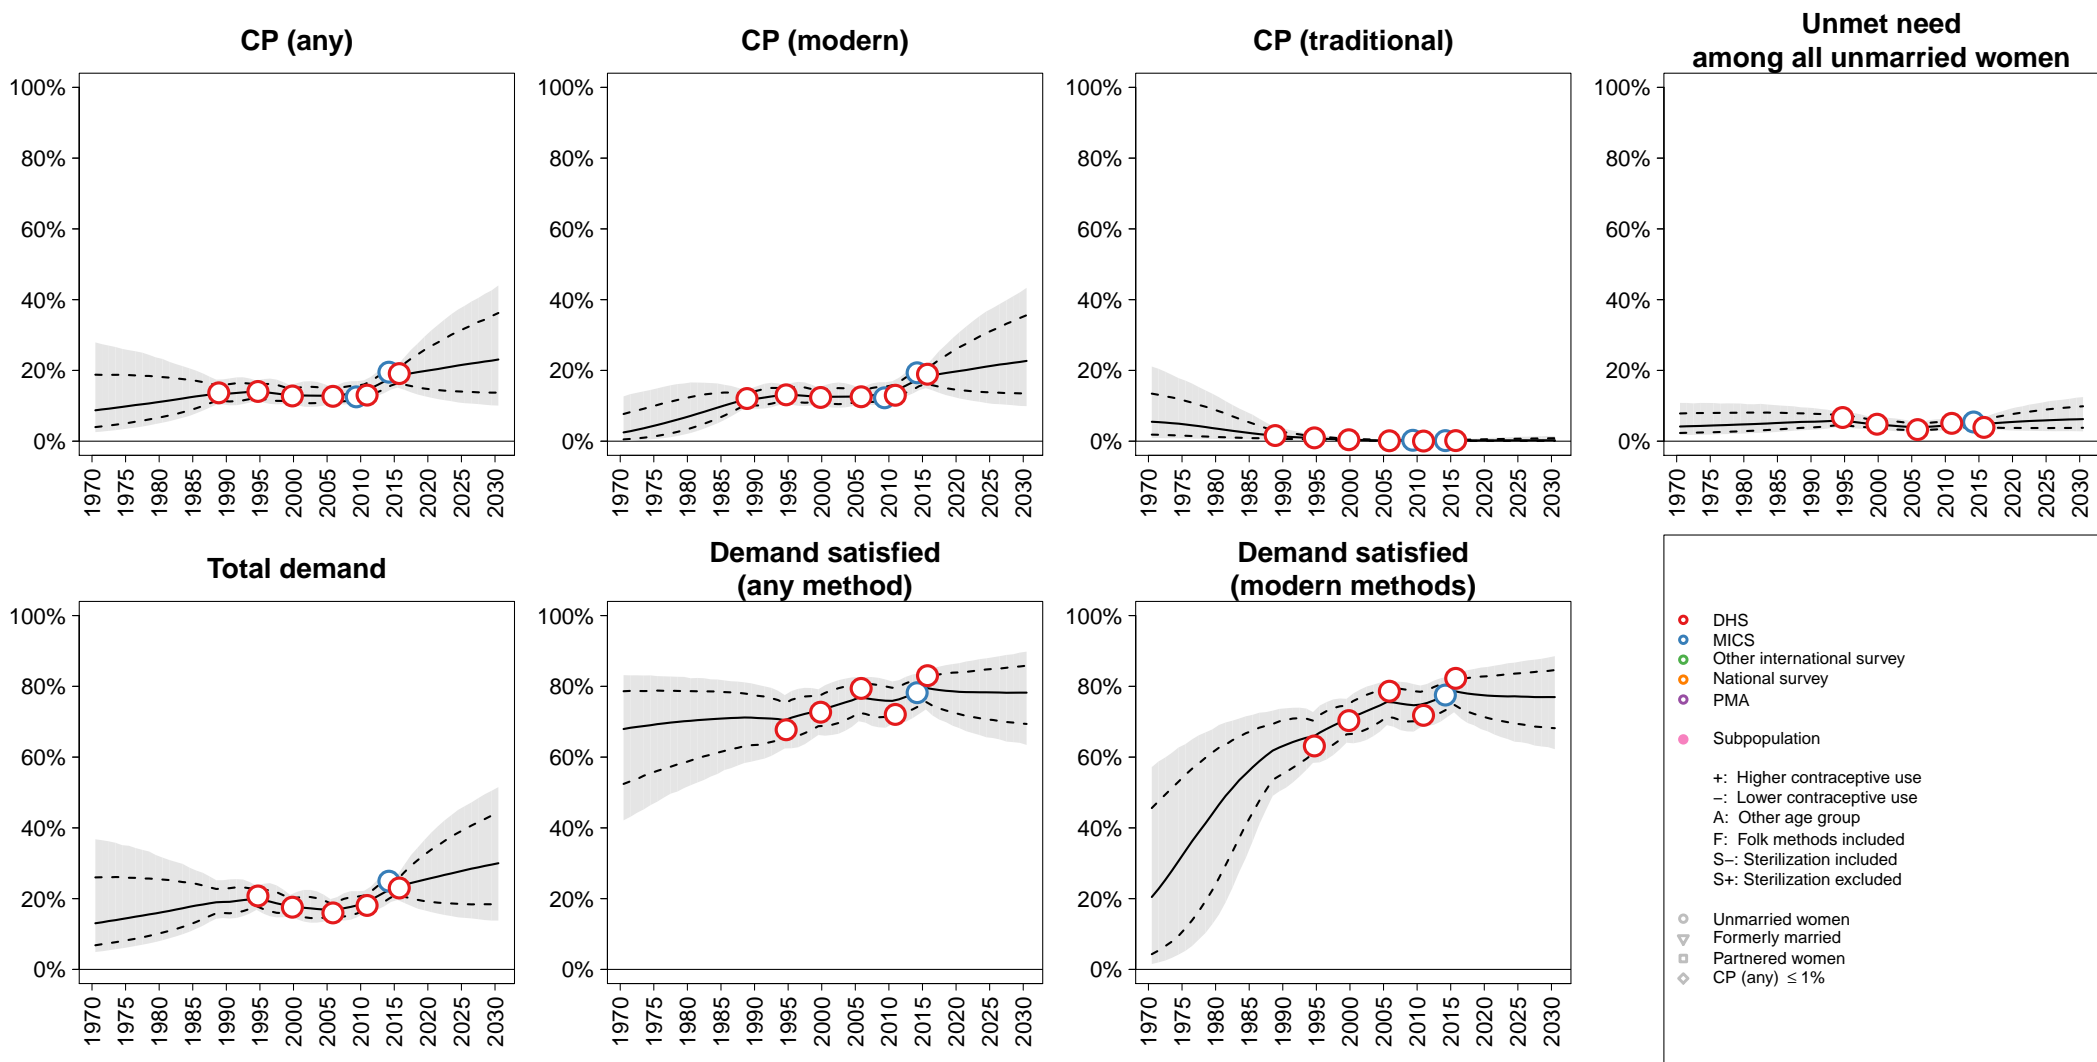

## 1.2 Country aggregates

World --- Unmarried / Not In-Union

**CP (any)**

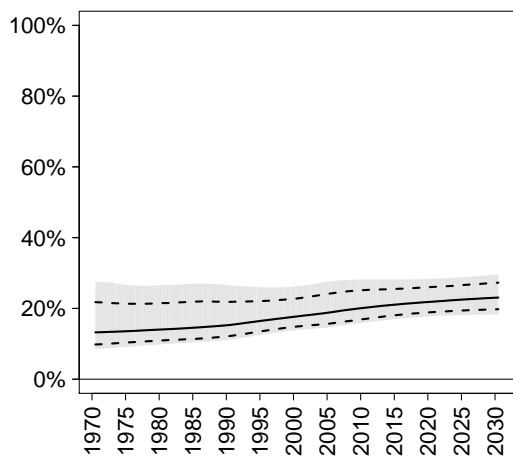

**CP (modern)**

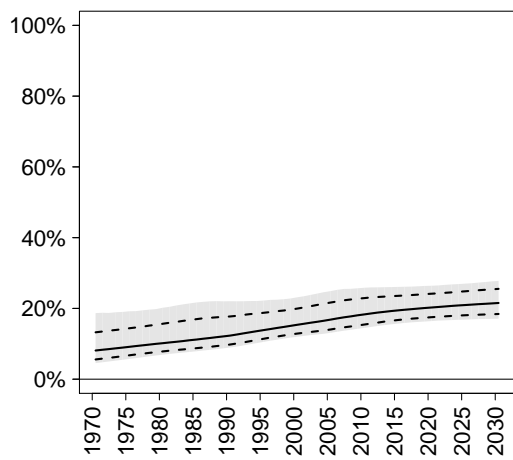

**CP (traditional)**

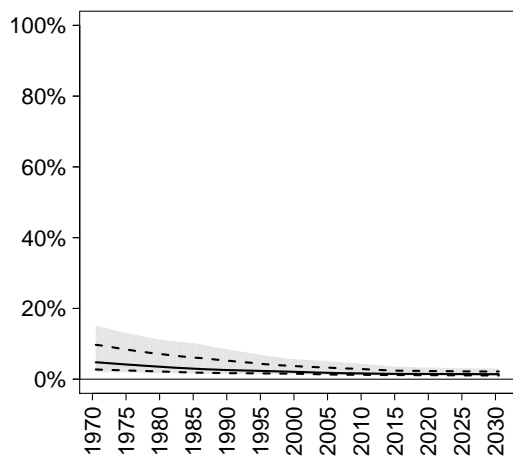

**Unmet need among all unmarried women**

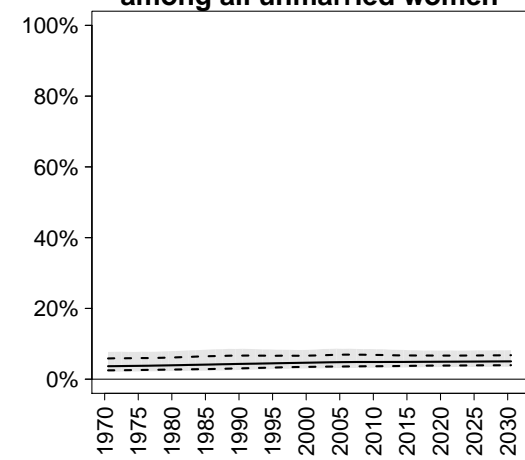

**Total demand**

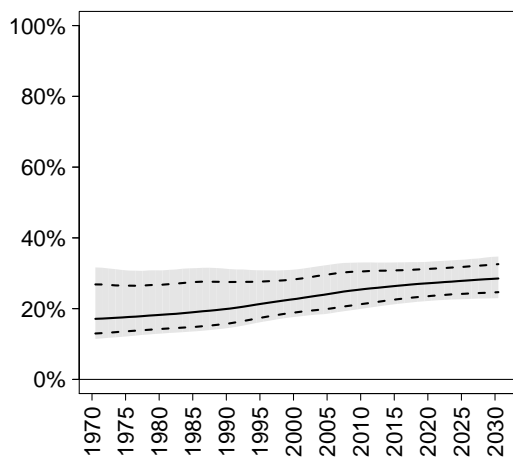

**Demand satisfied (any method)**

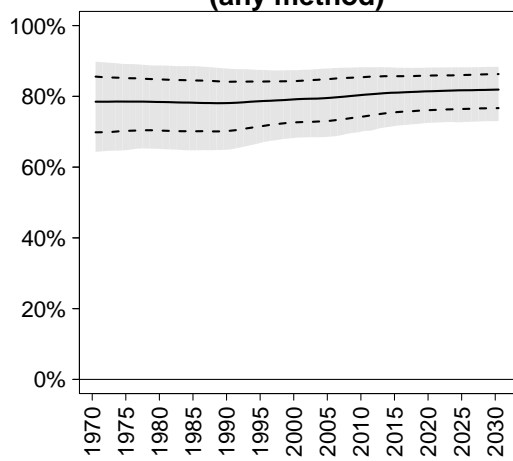

**Demand satisfied (modern methods)**

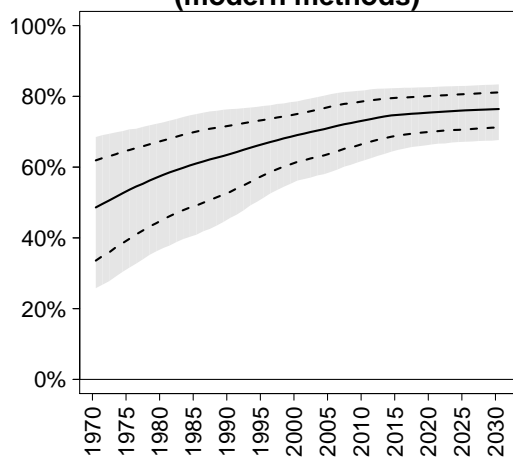

High-income countries --- Unmarried / Not In-Union

**CP (any)**

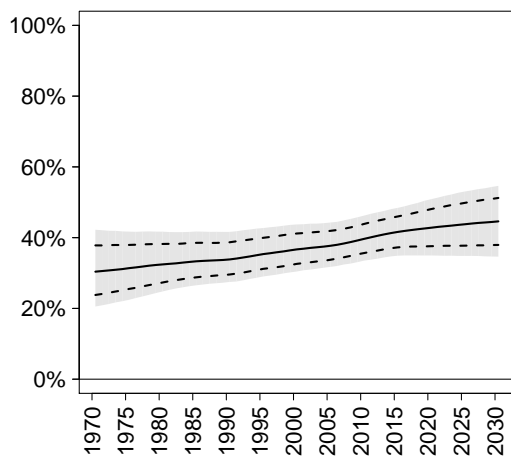

**CP (modern)**

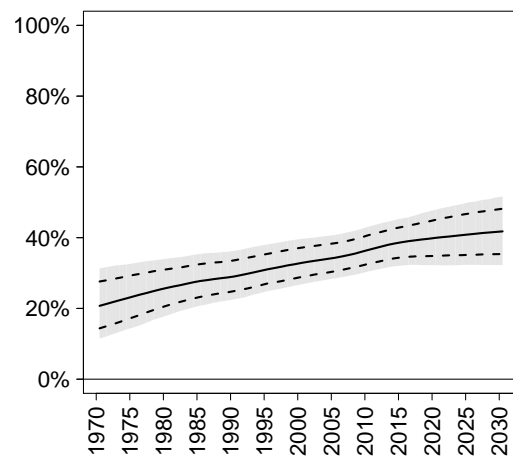

**CP (traditional)**

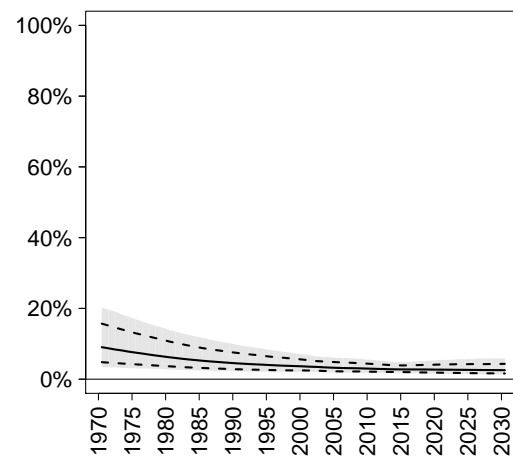

**Unmet need among all unmarried women**

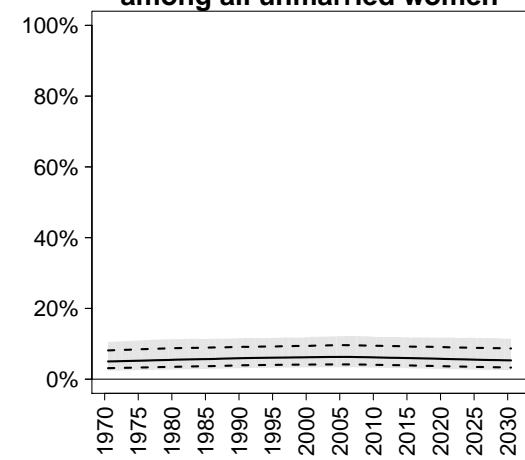

**Total demand**

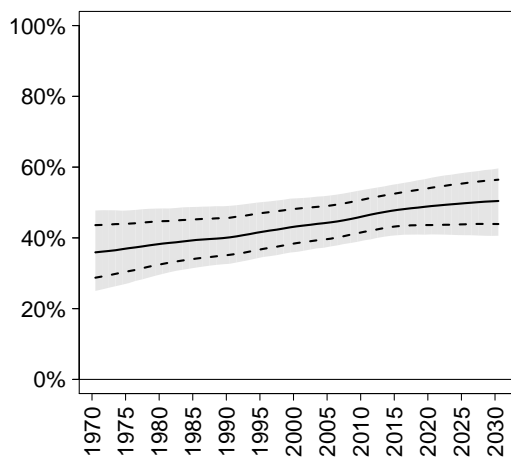

**Demand satisfied (any method)**

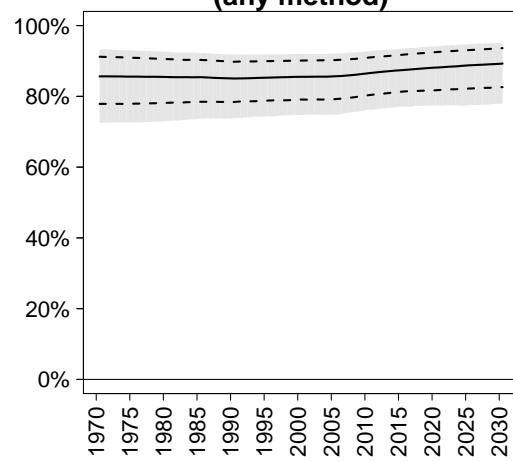

**Demand satisfied (modern methods)**

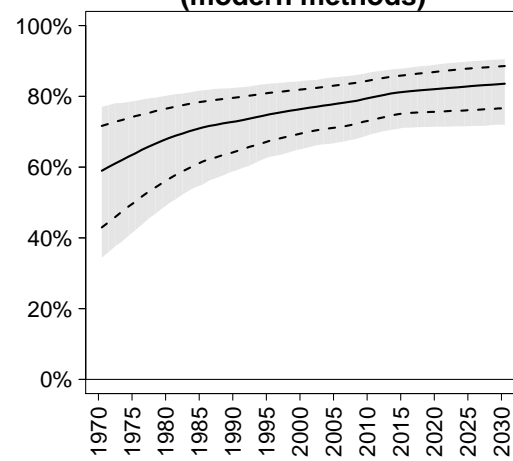



Upper-middle-income countries --- Unmarried / Not In-Union

**CP (any)**

**CP (modern)**

**CP (traditional)**

**Unmet need  
among all unmarried women**

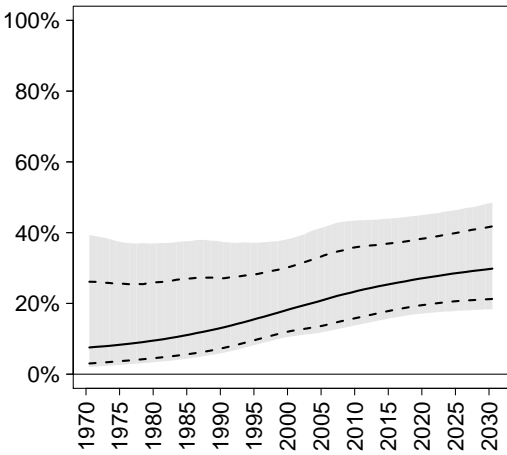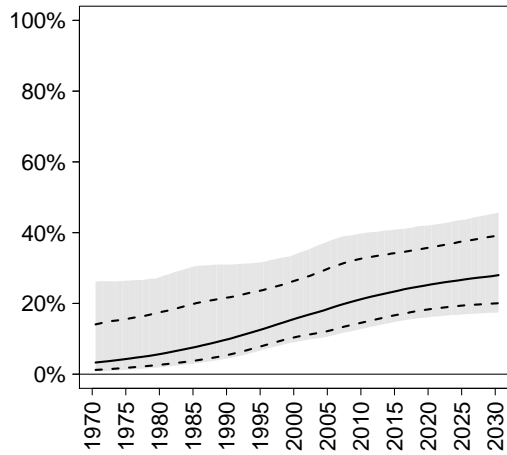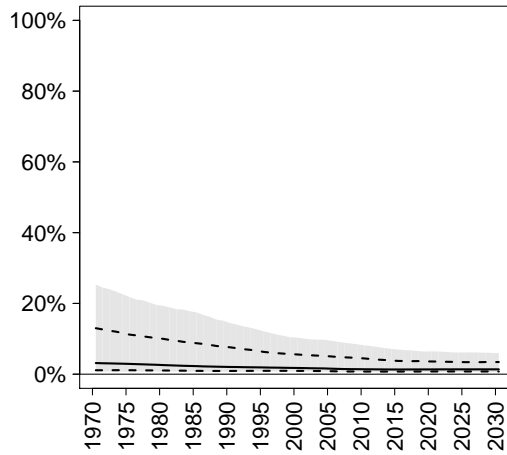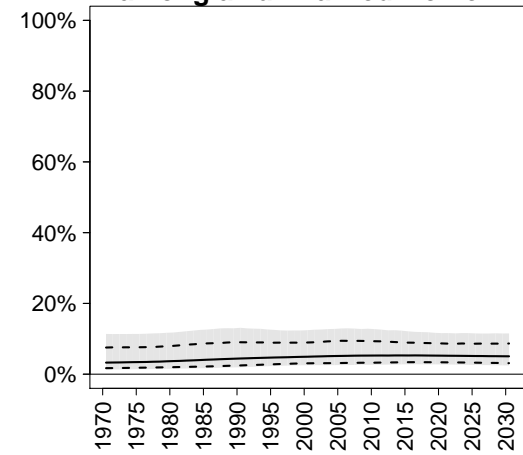

**Total demand**

**Demand satisfied  
(any method)**

**Demand satisfied  
(modern methods)**

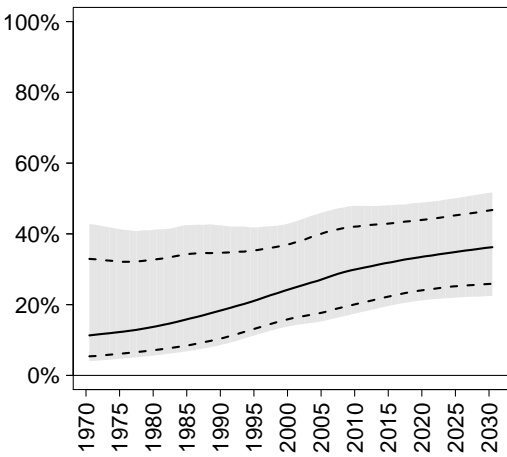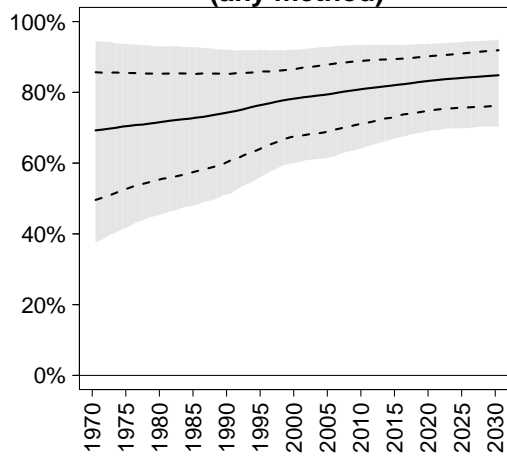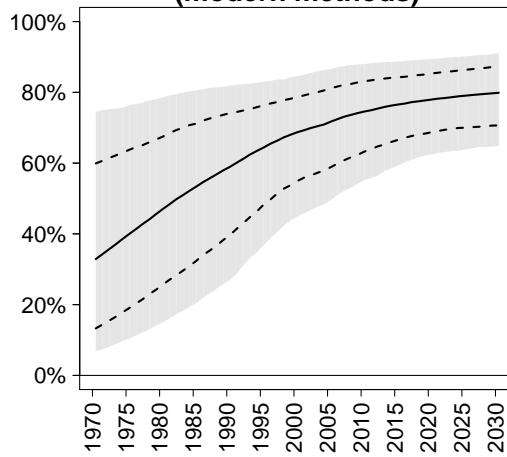

Lower-middle-income countries --- Unmarried / Not In-Union

**CP (any)**

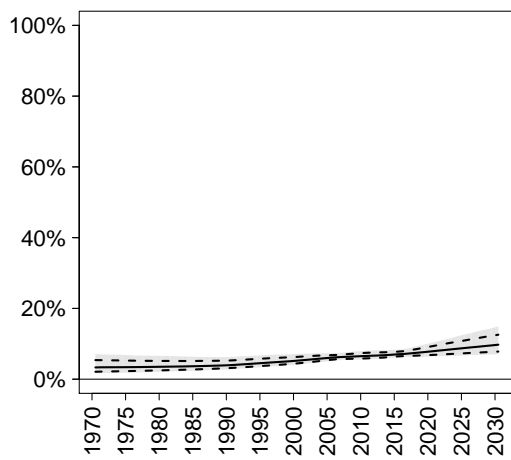

**CP (modern)**

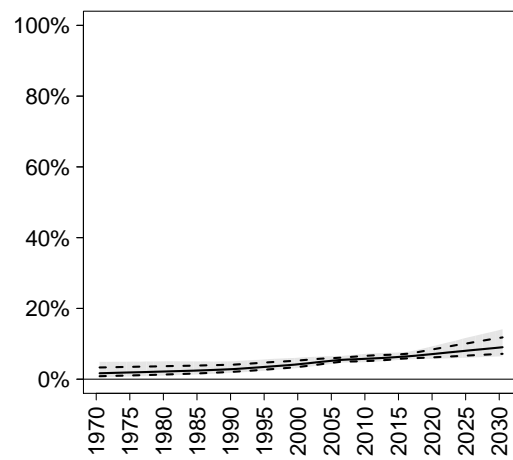

**CP (traditional)**

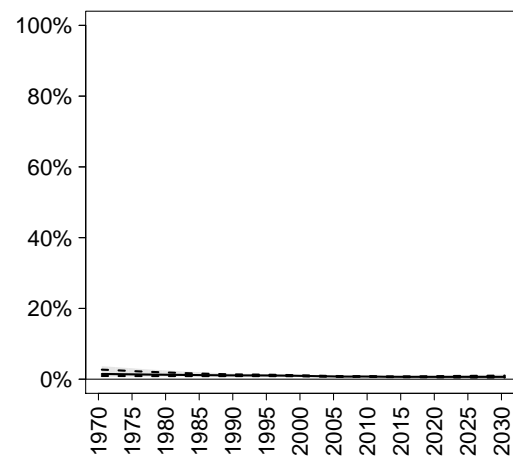

**Unmet need among all unmarried women**

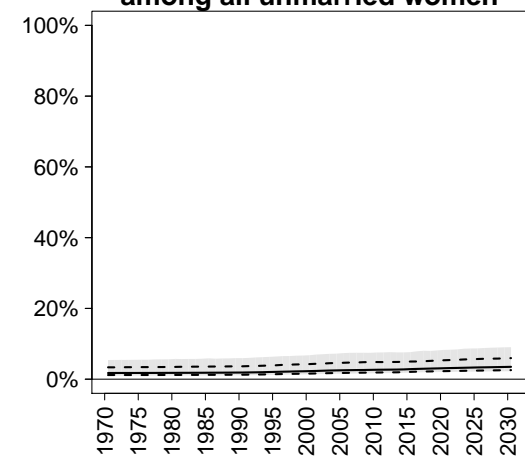

**Total demand**

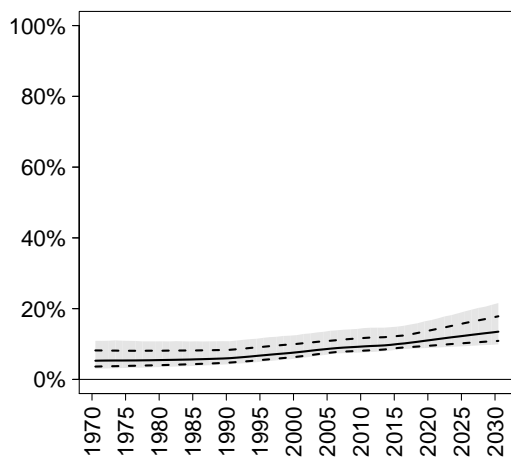

**Demand satisfied (any method)**

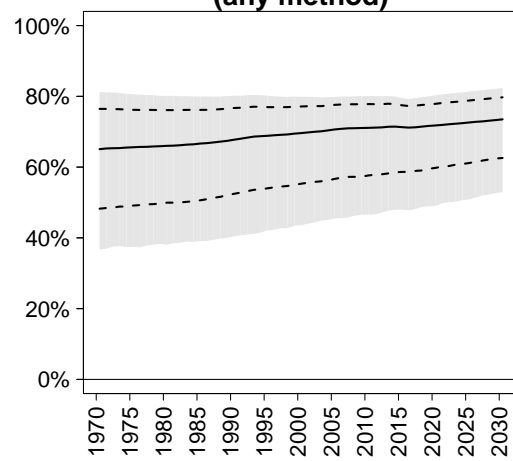

**Demand satisfied (modern methods)**

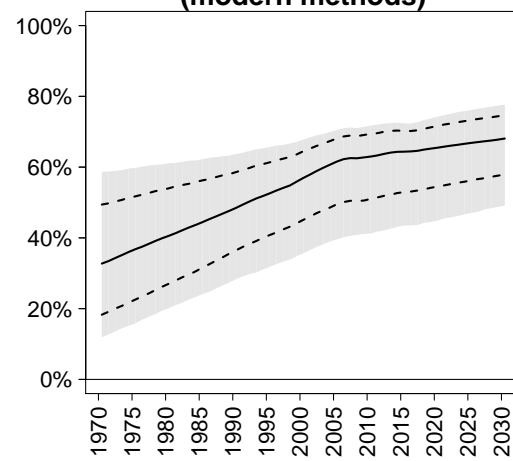

Low-income countries --- Unmarried / Not In-Union

**CP (any)**

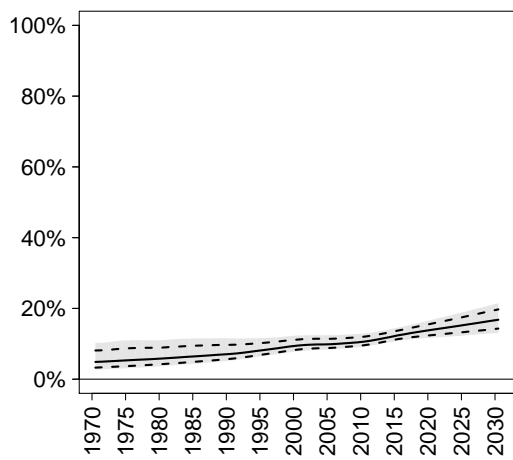

**CP (modern)**

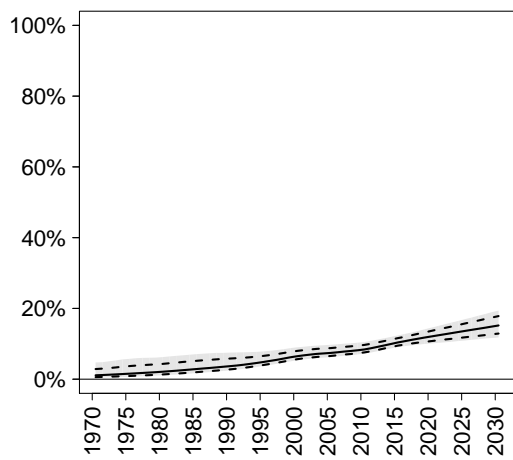

**CP (traditional)**

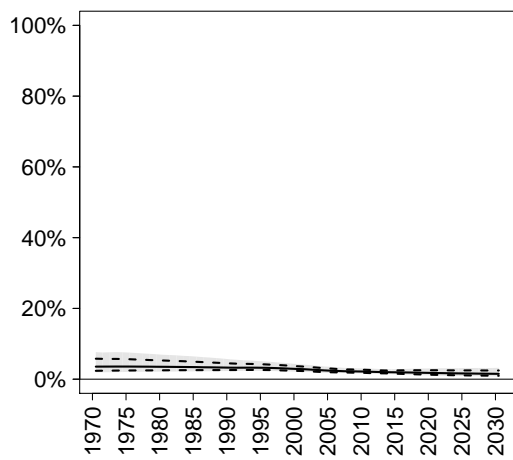

**Unmet need among all unmarried women**

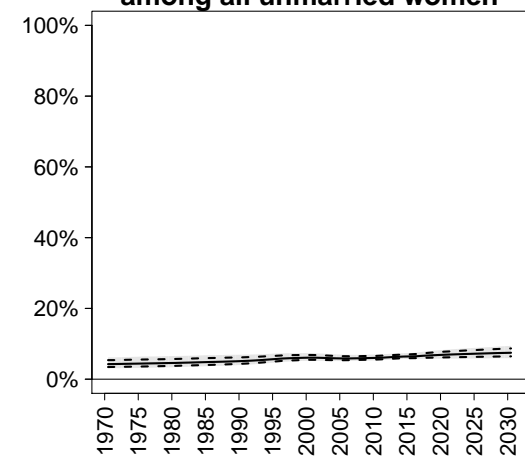

**Total demand**

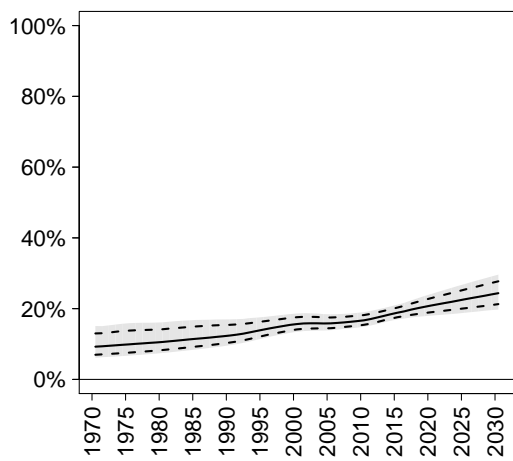

**Demand satisfied (any method)**

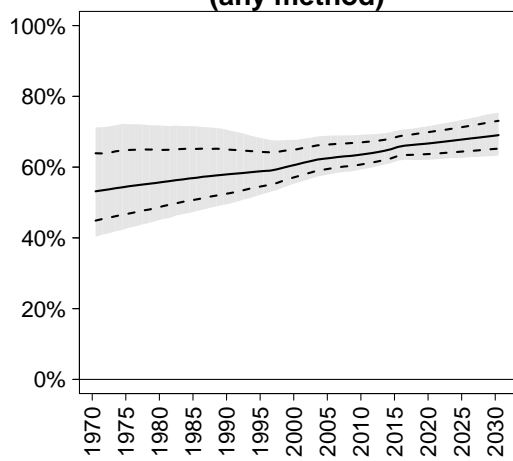

**Demand satisfied (modern methods)**

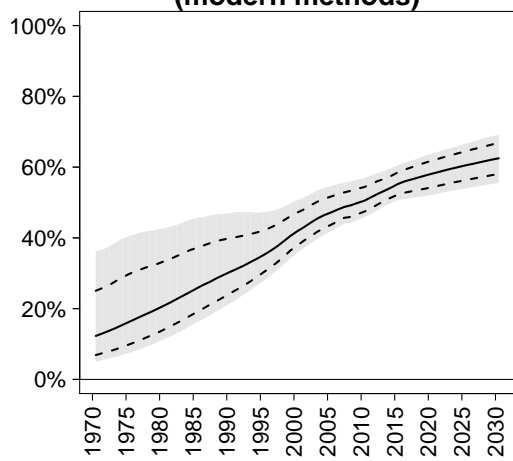

Africa --- Unmarried / Not In-Union

**CP (any)**

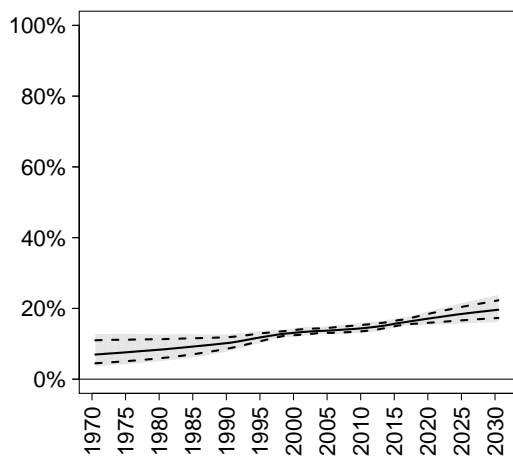

**CP (modern)**

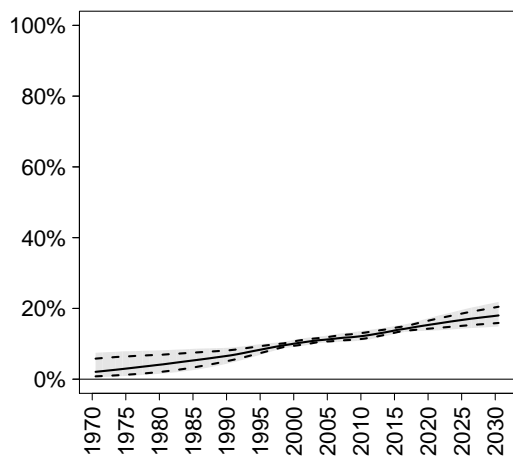

**CP (traditional)**

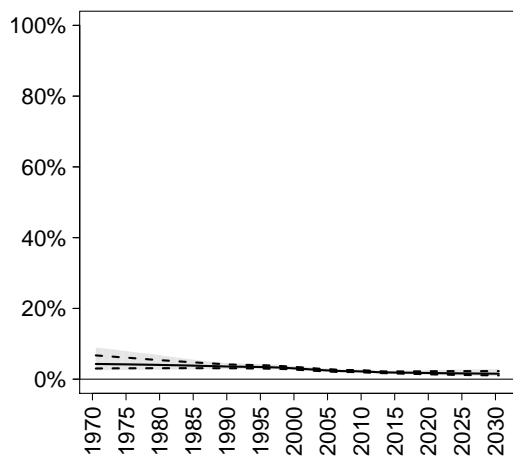

**Unmet need among all unmarried women**

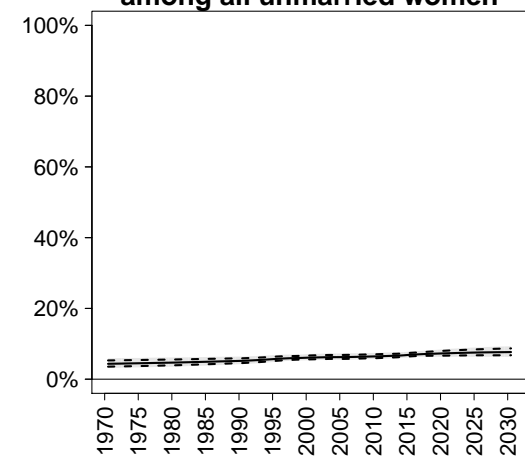

**Total demand**

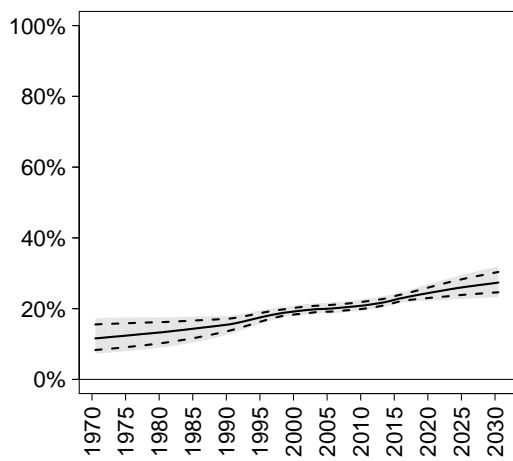

**Demand satisfied (any method)**

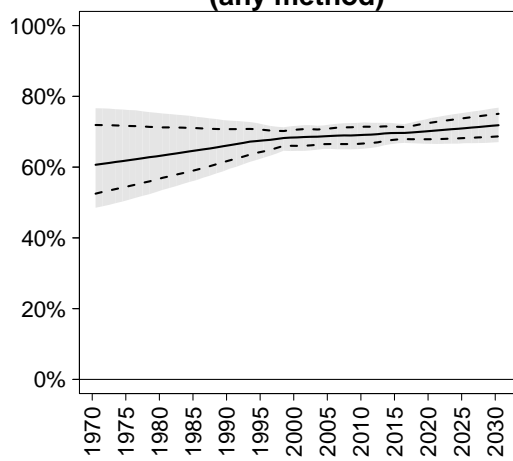

**Demand satisfied (modern methods)**

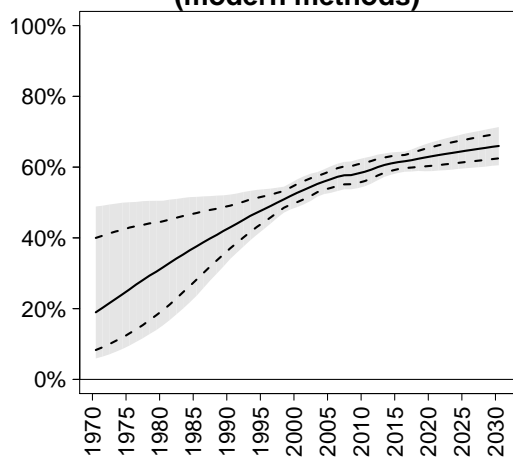

Eastern Africa --- Unmarried / Not In-Union

CP (any)

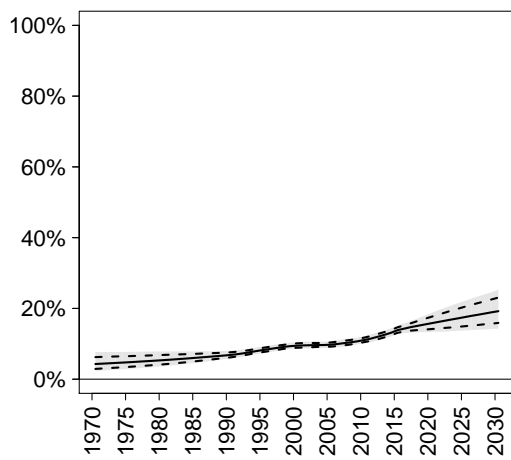

CP (modern)

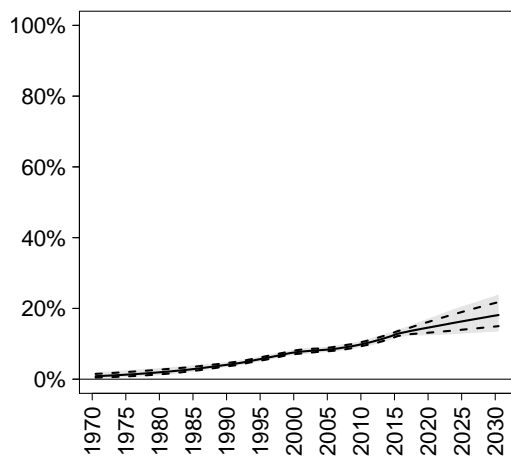

CP (traditional)

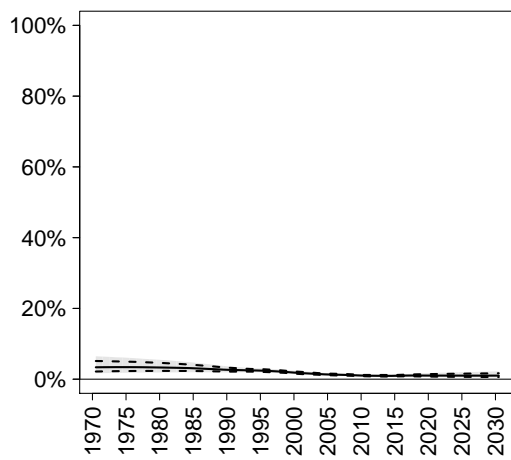

Unmet need among all unmarried women

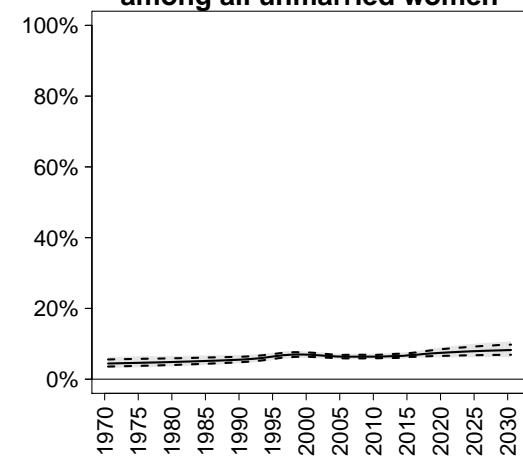

Total demand

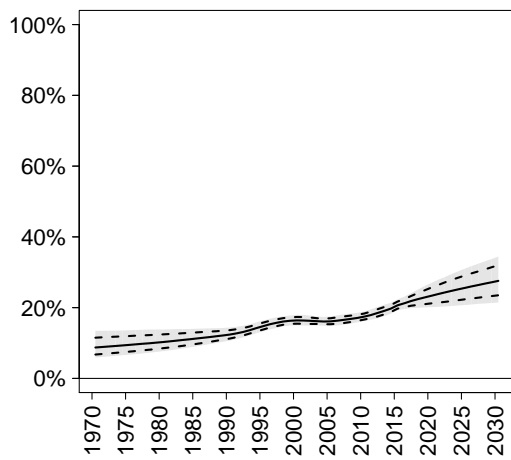

Demand satisfied (any method)

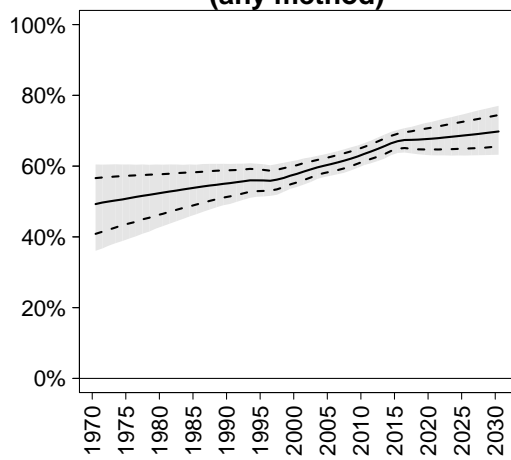

Demand satisfied (modern methods)

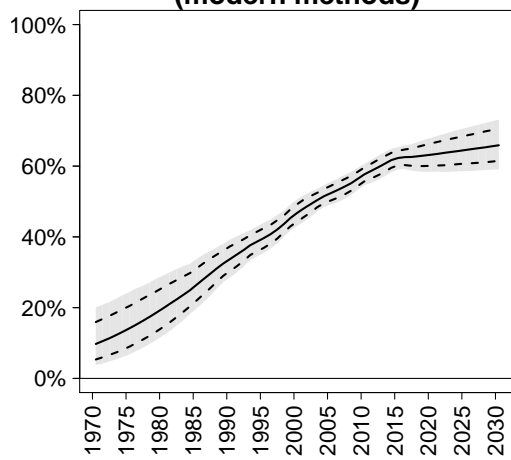

Middle Africa --- Unmarried / Not In-Union

**CP (any)**

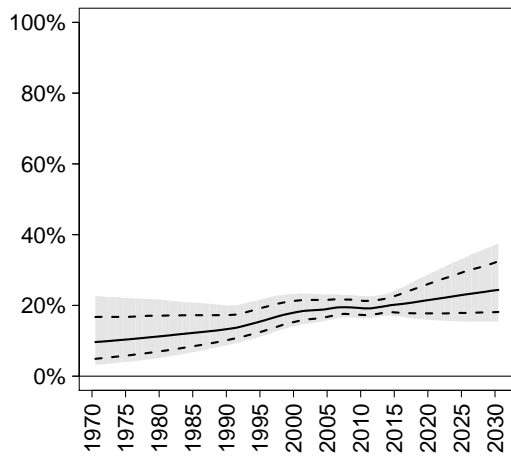

**CP (modern)**

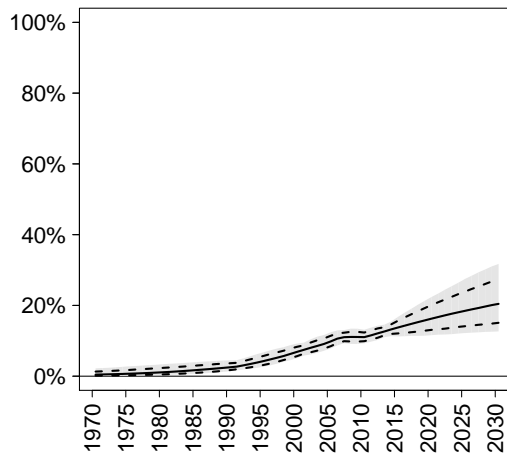

**CP (traditional)**

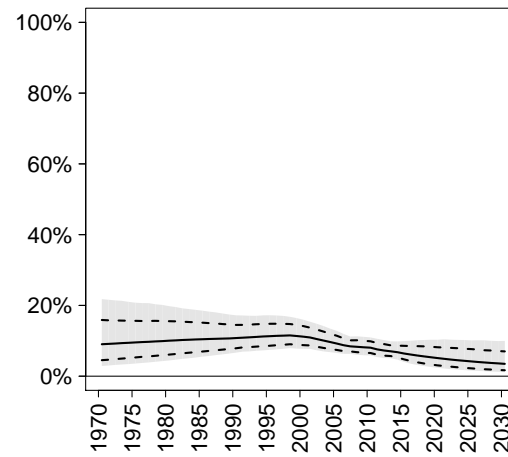

**Unmet need among all unmarried women**

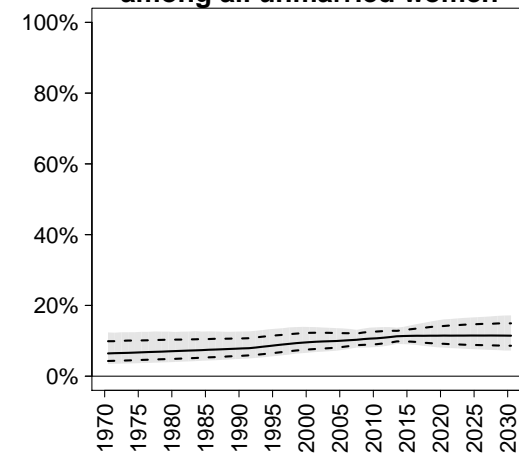

**Total demand**

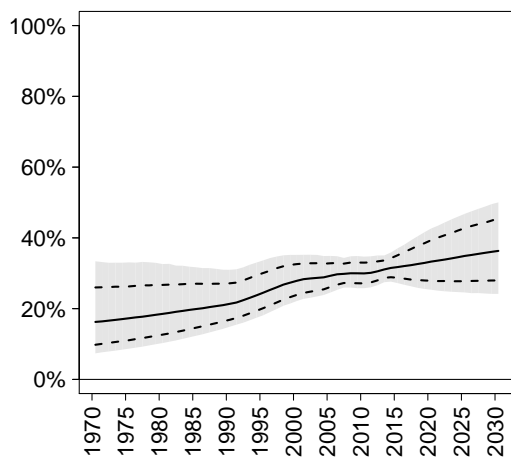

**Demand satisfied (any method)**

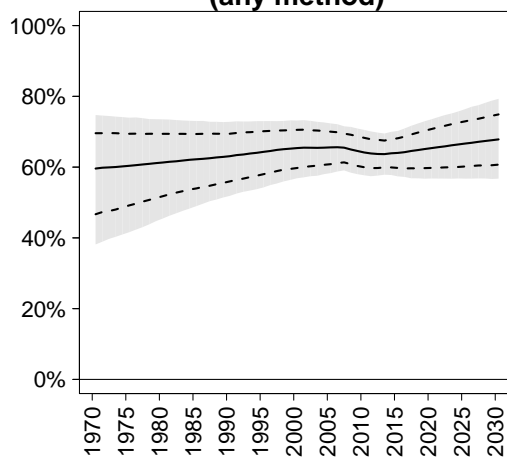

**Demand satisfied (modern methods)**

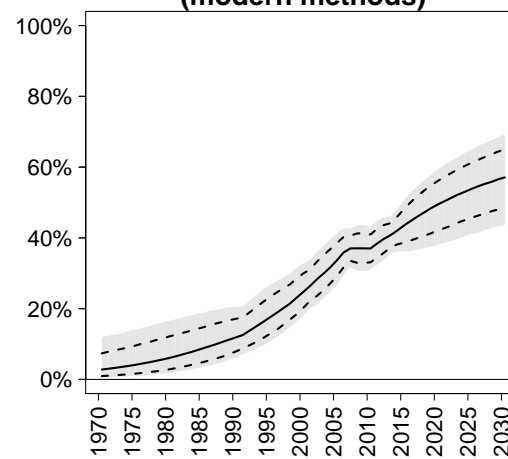

Northern Africa --- Unmarried / Not In-Union

**CP (any)**

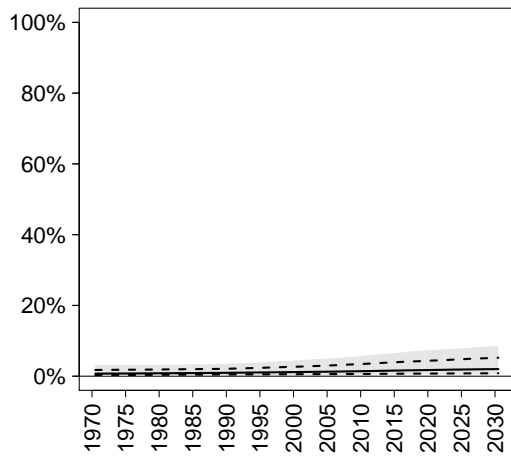

**CP (modern)**

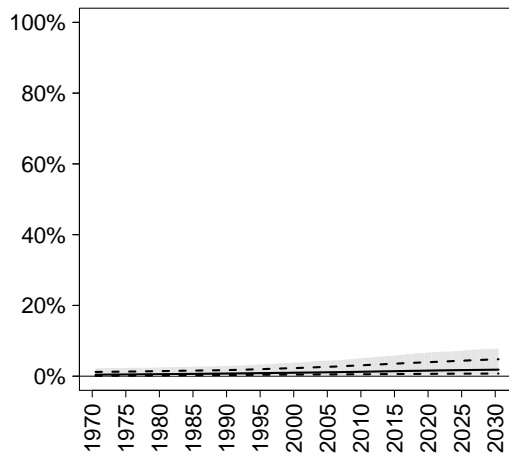

**CP (traditional)**

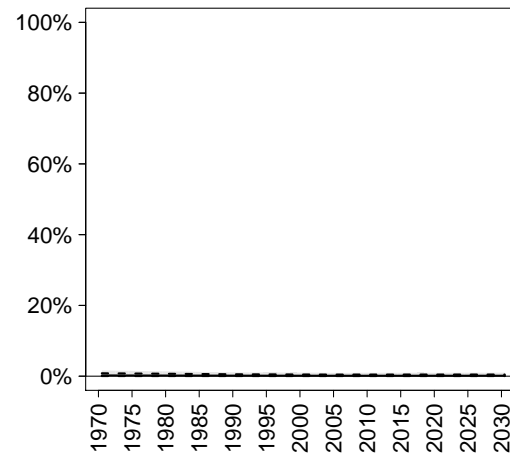

**Unmet need among all unmarried women**

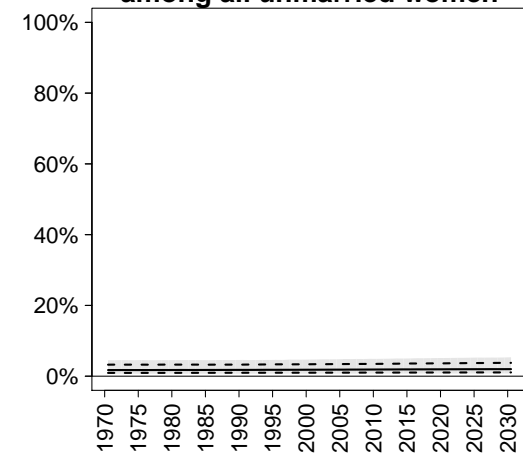

**Total demand**

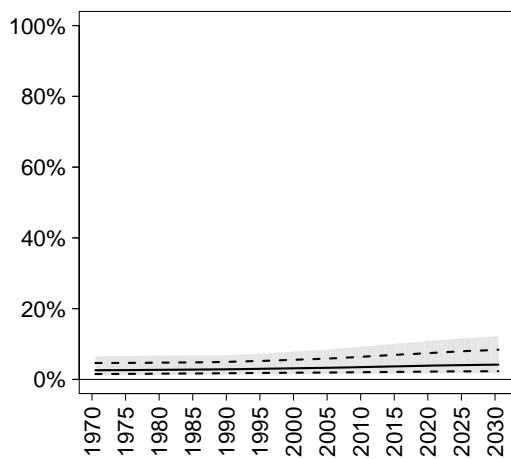

**Demand satisfied (any method)**

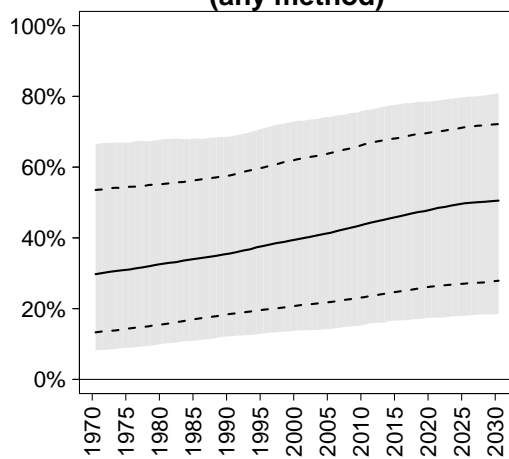

**Demand satisfied (modern methods)**

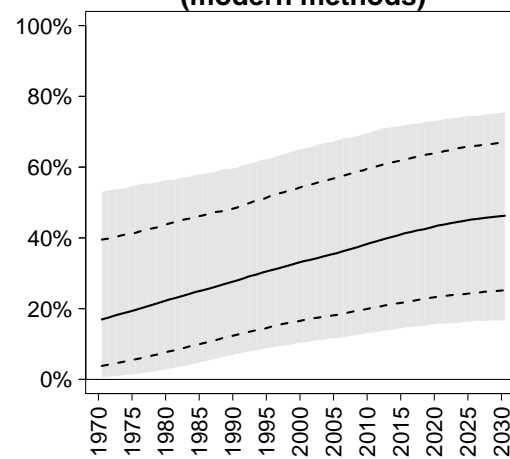

Southern Africa --- Unmarried / Not In-Union

**CP (any)**

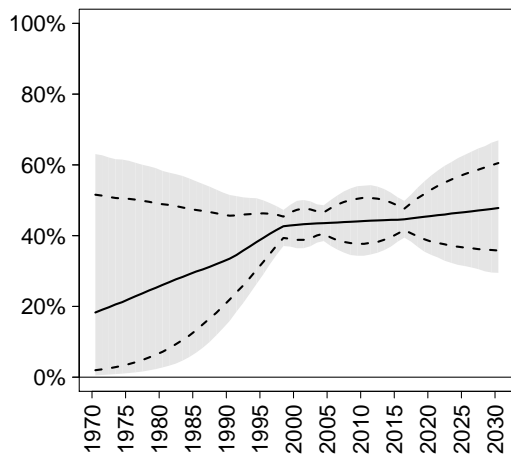

**CP (modern)**

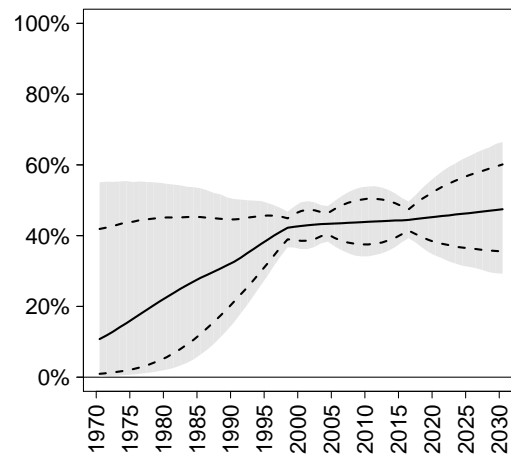

**CP (traditional)**

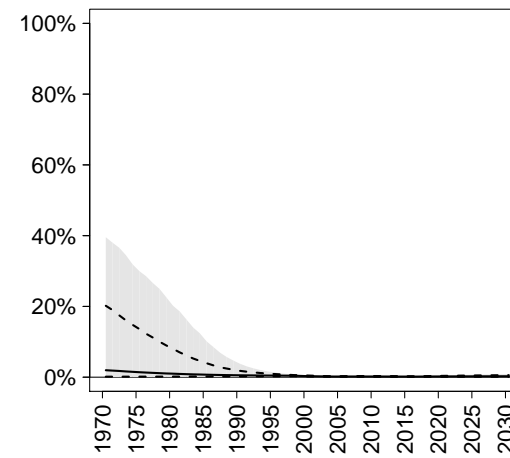

**Unmet need among all unmarried women**

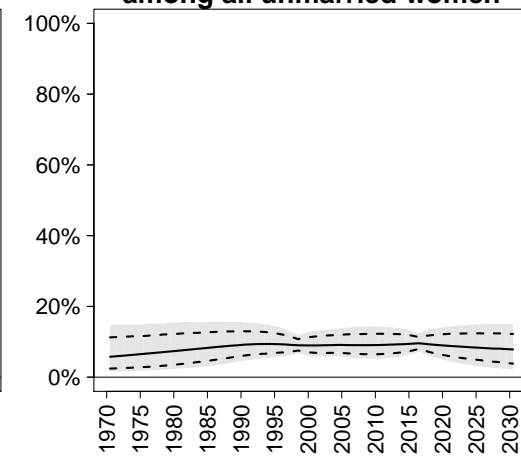

**Total demand**

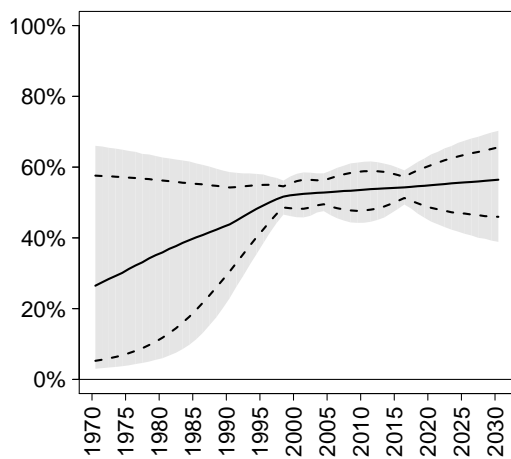

**Demand satisfied (any method)**

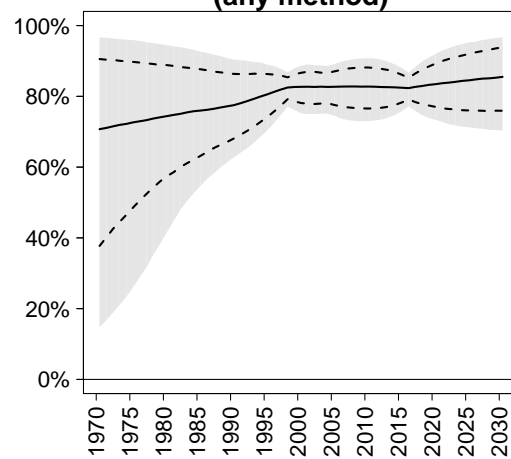

**Demand satisfied (modern methods)**

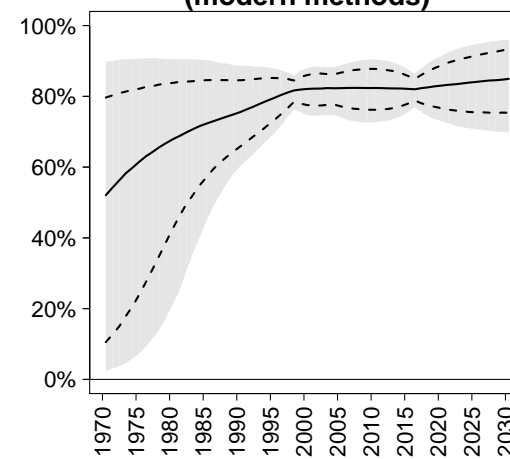



Western Africa --- Unmarried / Not In-Union

**CP (any)**

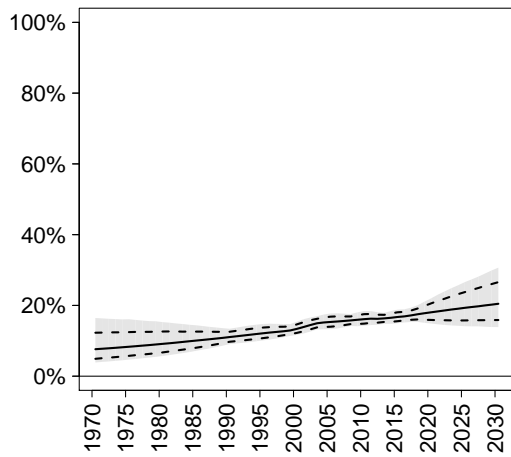

**CP (modern)**

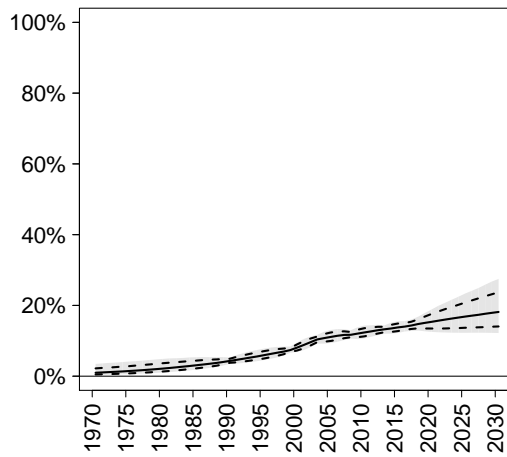

**CP (traditional)**

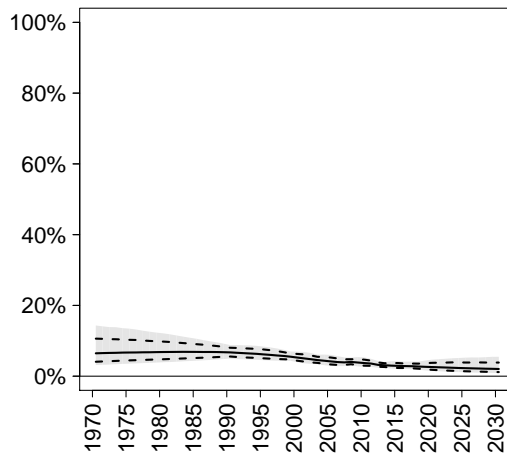

**Unmet need among all unmarried women**

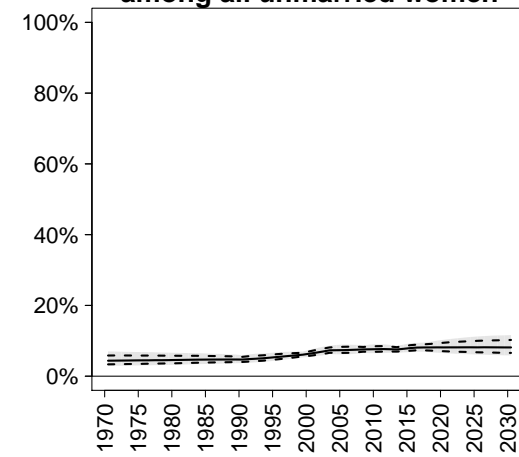

**Total demand**

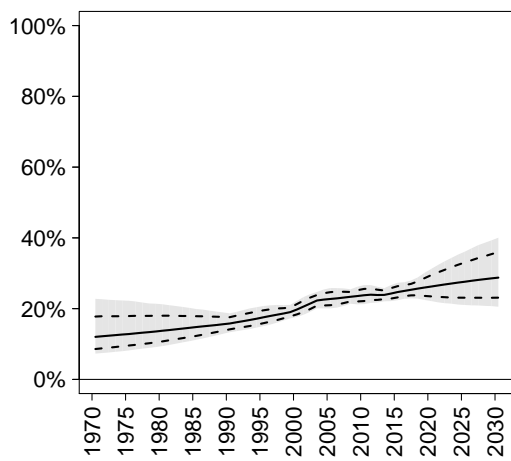

**Demand satisfied (any method)**

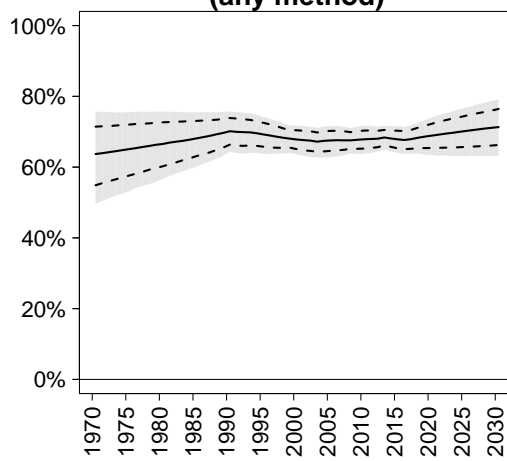

**Demand satisfied (modern methods)**

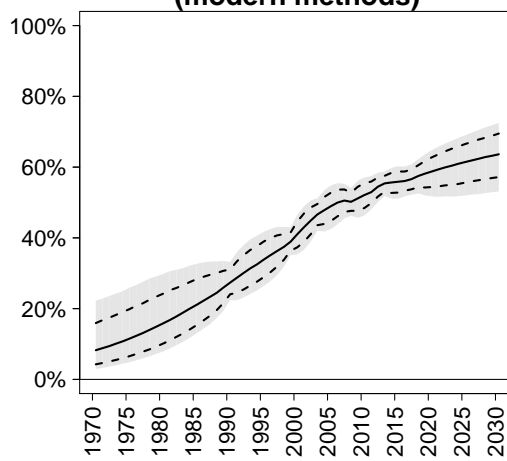

Asia --- Unmarried / Not In-Union

**CP (any)**

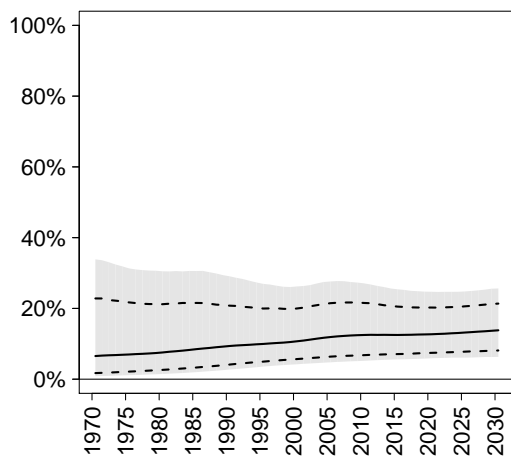

**CP (modern)**

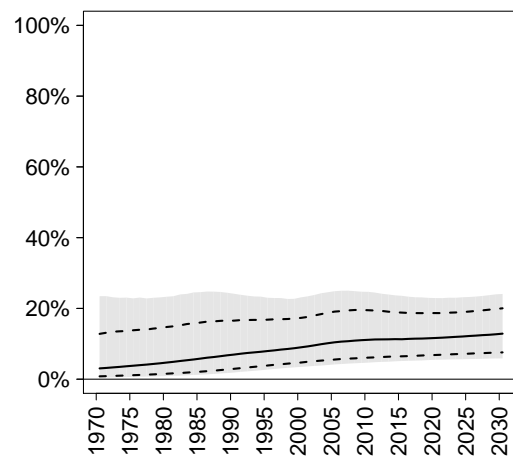

**CP (traditional)**

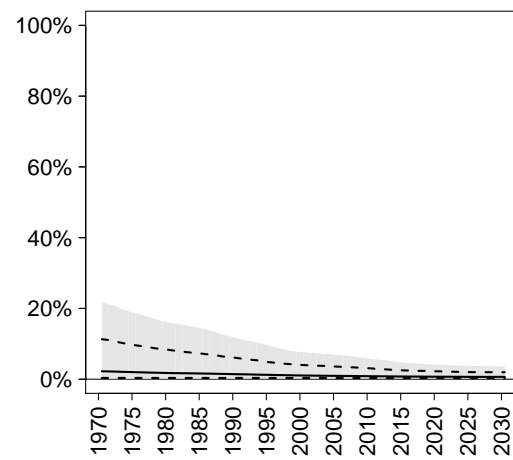

**Unmet need among all unmarried women**

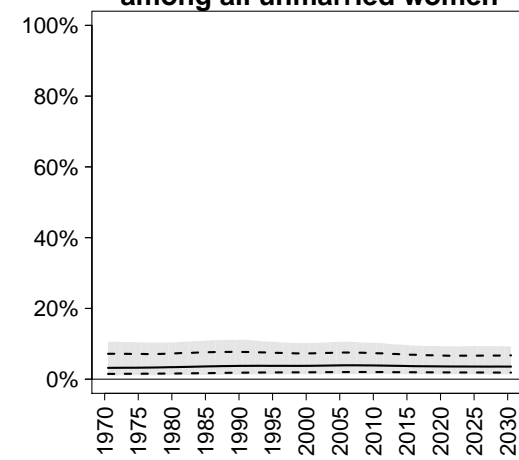

**Total demand**

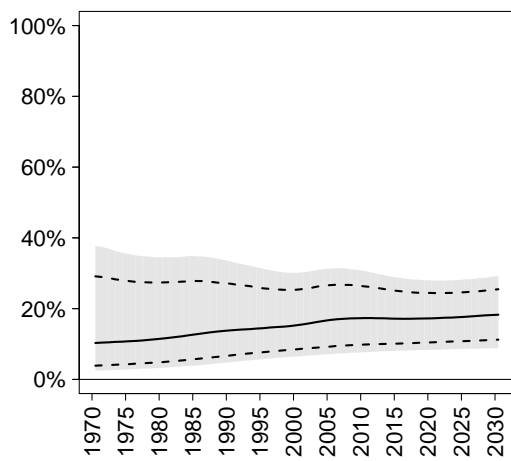

**Demand satisfied (any method)**

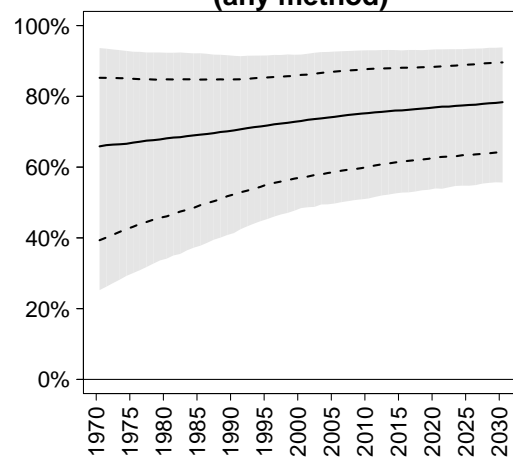

**Demand satisfied (modern methods)**

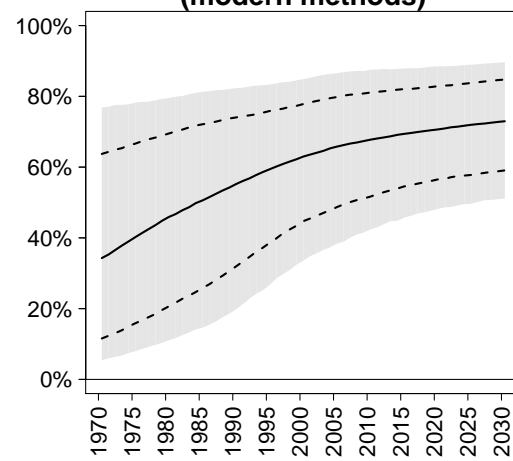

Central Asia --- Unmarried / Not In-Union

CP (any)

CP (modern)

CP (traditional)

Unmet need among all unmarried women

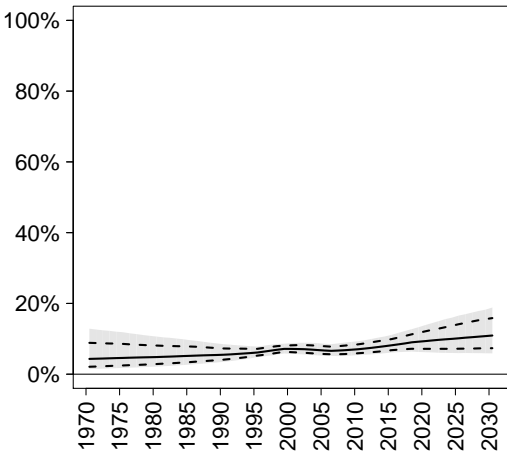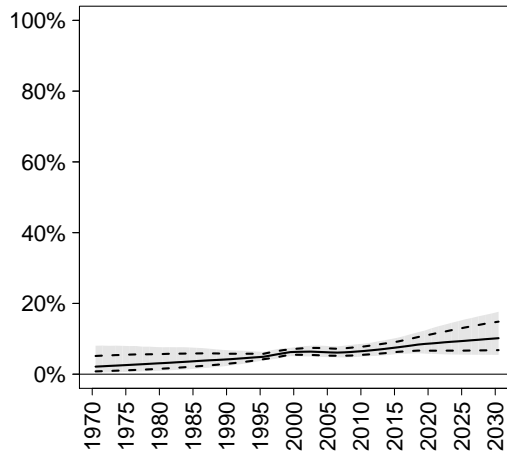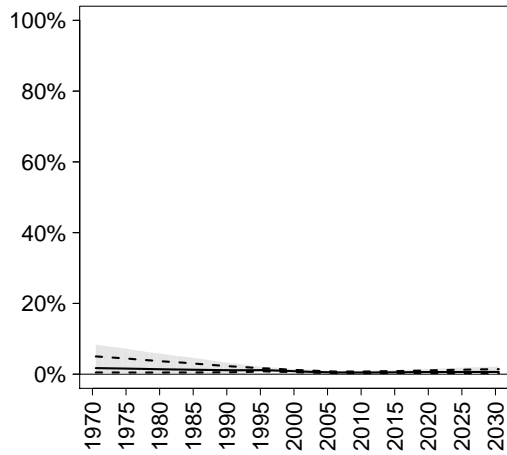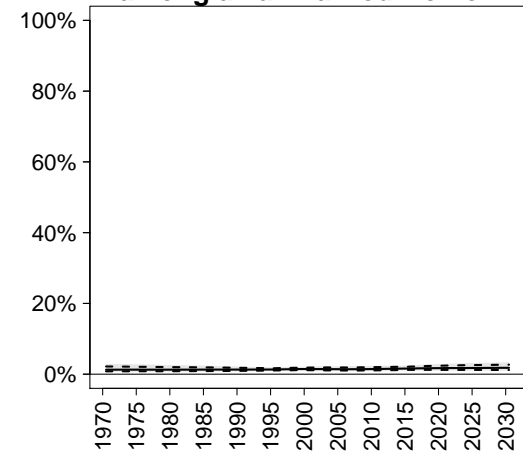

Total demand

Demand satisfied (any method)

Demand satisfied (modern methods)

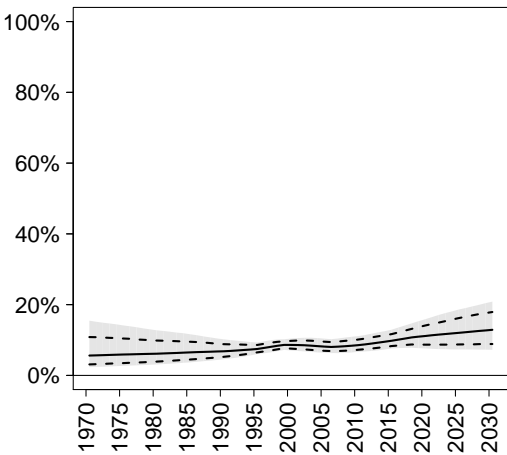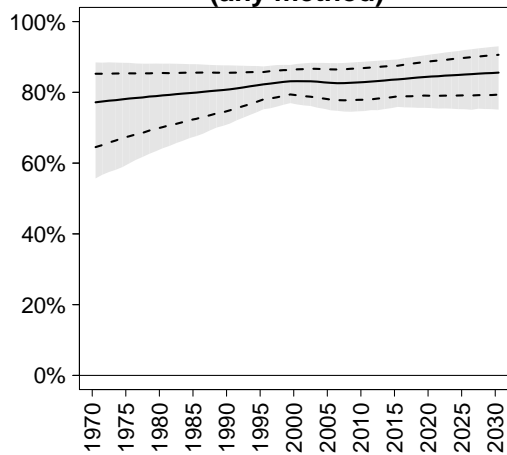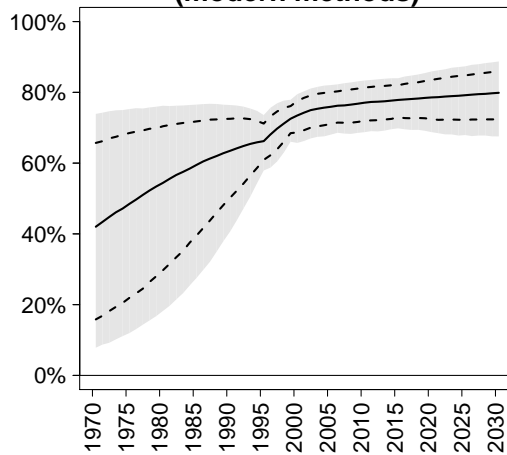

Eastern Asia --- Unmarried / Not In-Union

**CP (any)**

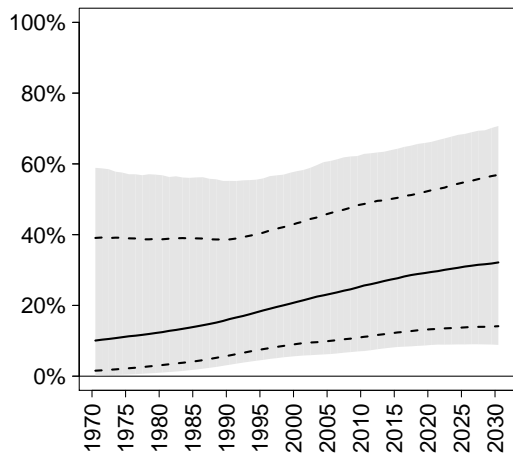

**CP (modern)**

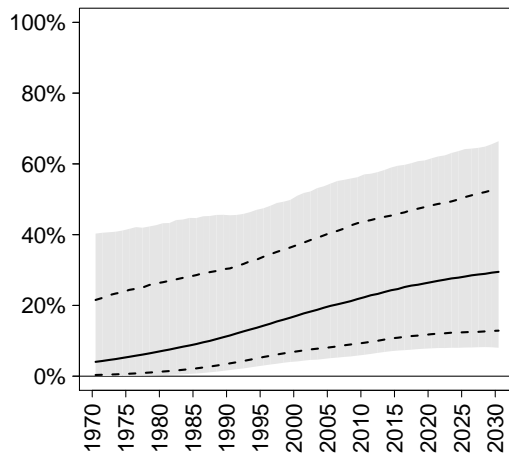

**CP (traditional)**

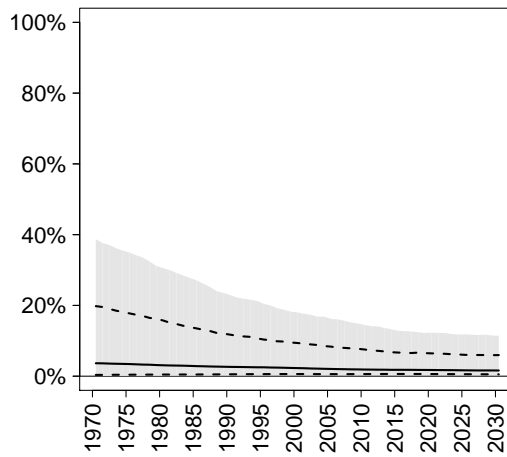

**Unmet need among all unmarried women**

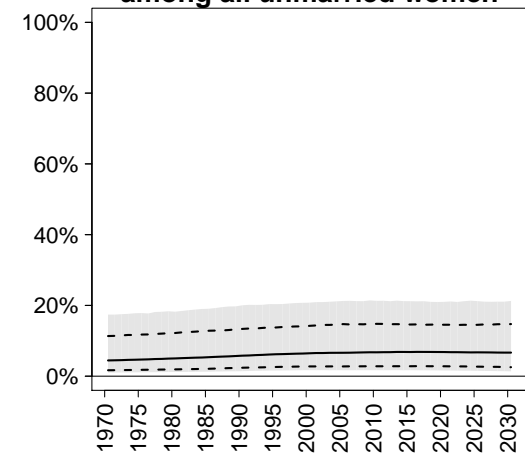

**Total demand**

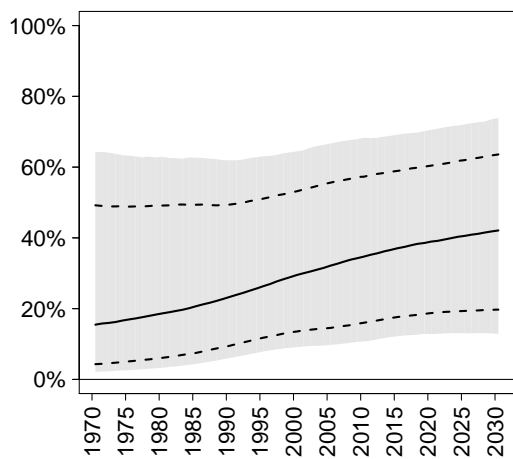

**Demand satisfied (any method)**

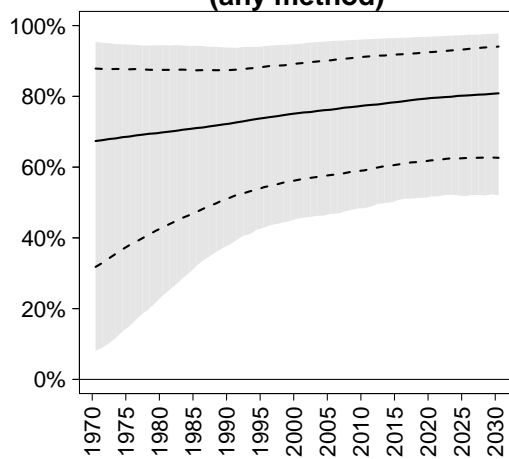

**Demand satisfied (modern methods)**

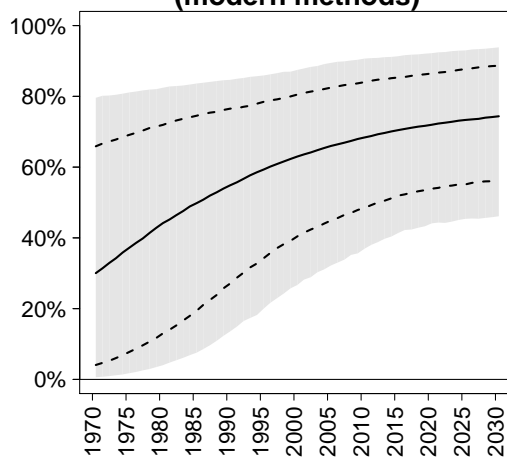

South-eastern Asia --- Unmarried / Not In-Union

**CP (any)**

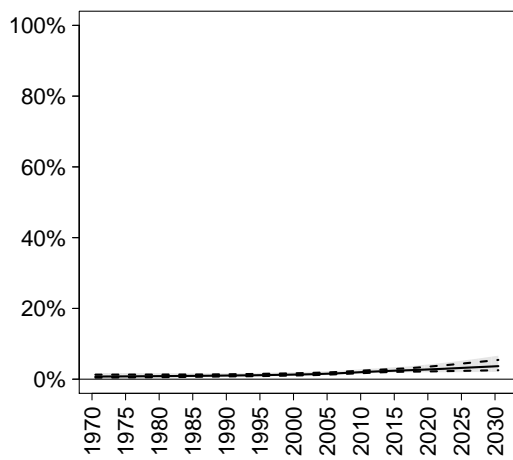

**CP (modern)**

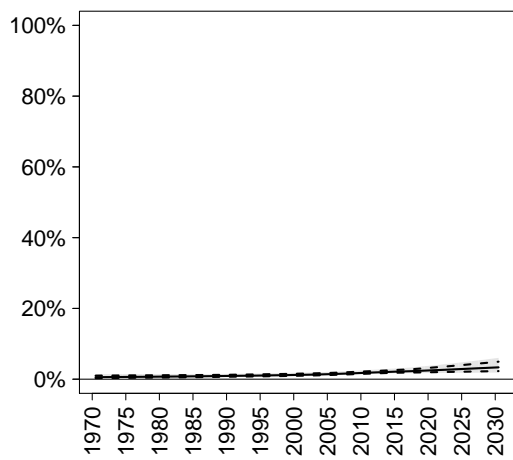

**CP (traditional)**

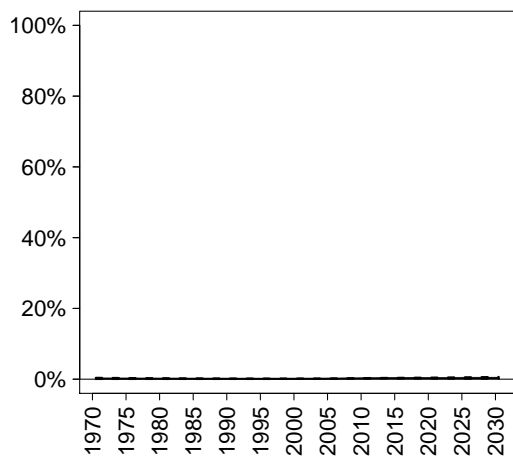

**Unmet need among all unmarried women**

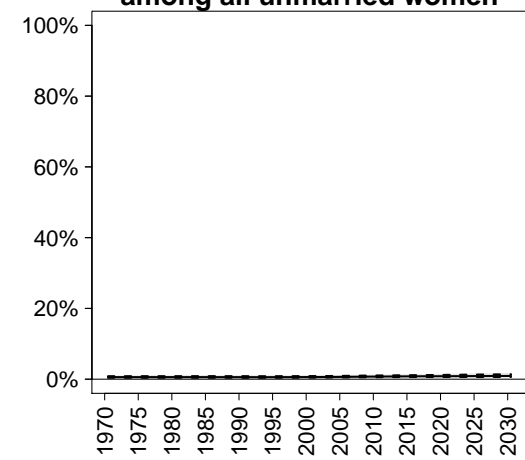

**Total demand**

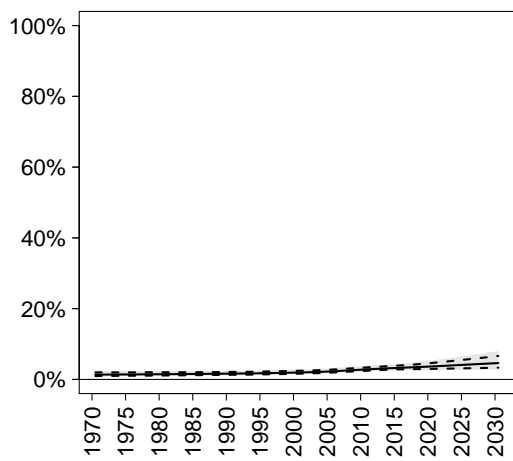

**Demand satisfied (any method)**

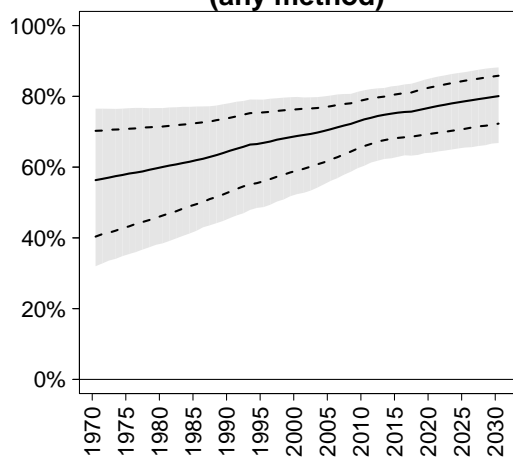

**Demand satisfied (modern methods)**

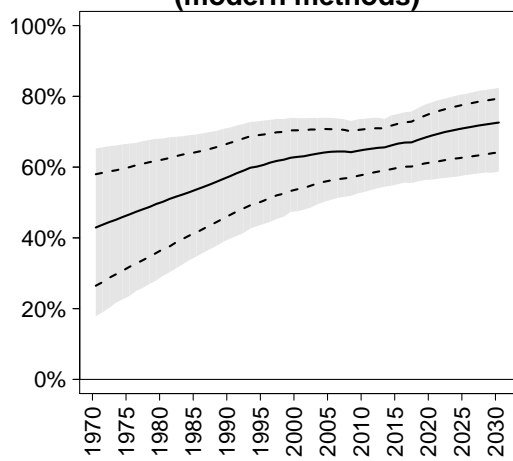

Southern Asia --- Unmarried / Not In-Union

**CP (any)**

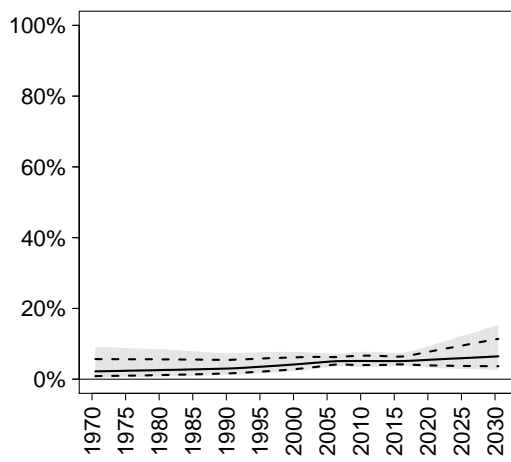

**CP (modern)**

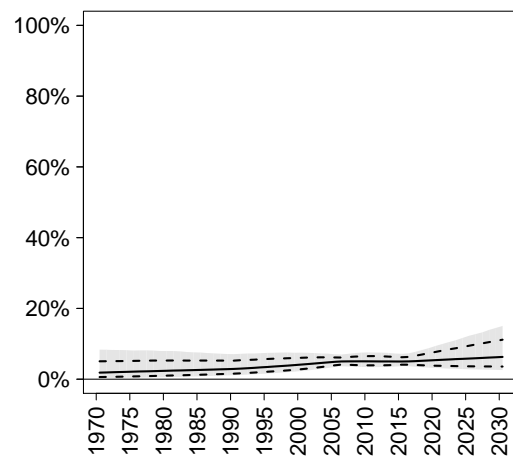

**CP (traditional)**

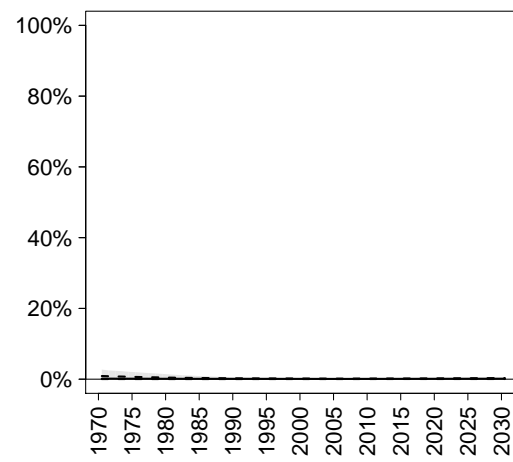

**Unmet need among all unmarried women**

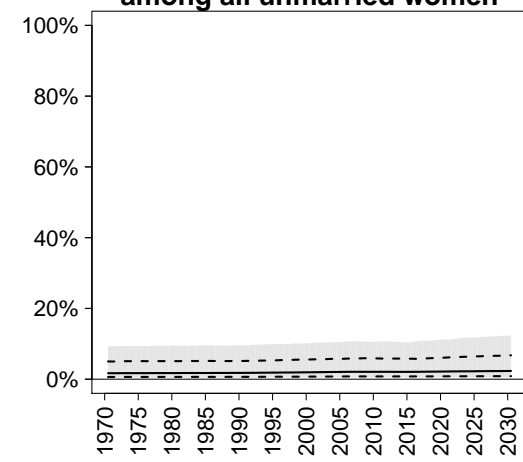

**Total demand**

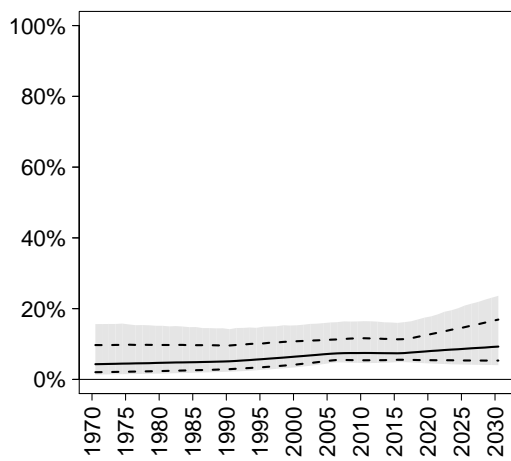

**Demand satisfied (any method)**

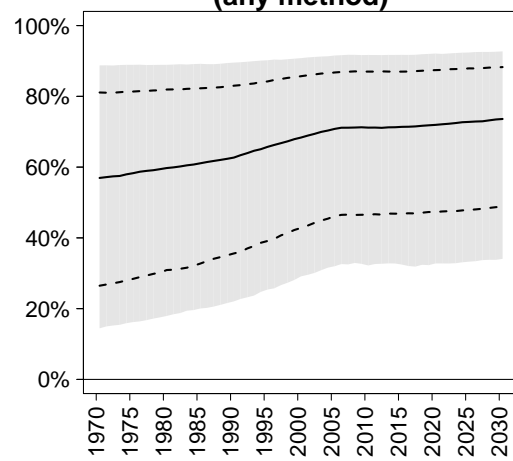

**Demand satisfied (modern methods)**

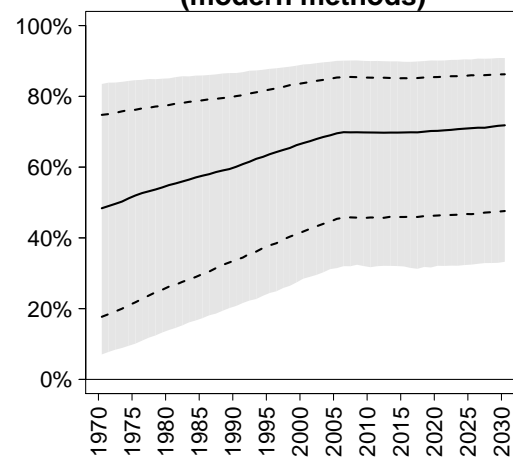

Western Asia --- Unmarried / Not In-Union

**CP (any)**

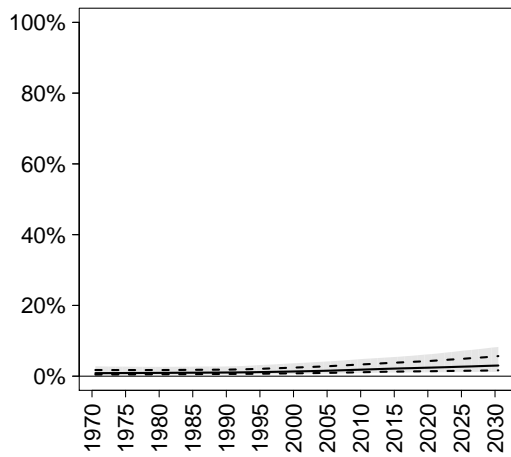

**CP (modern)**

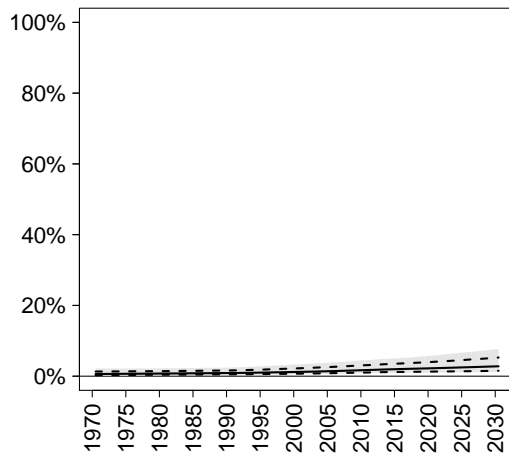

**CP (traditional)**

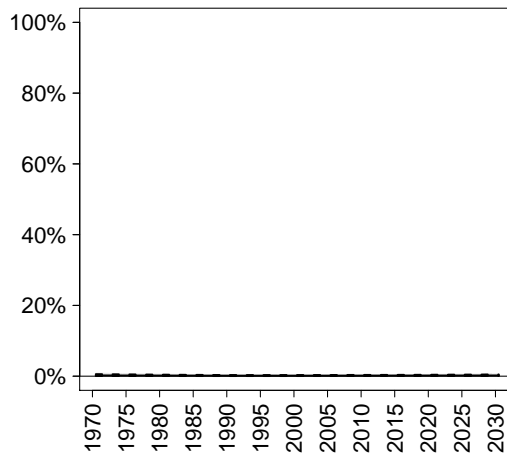

**Unmet need among all unmarried women**

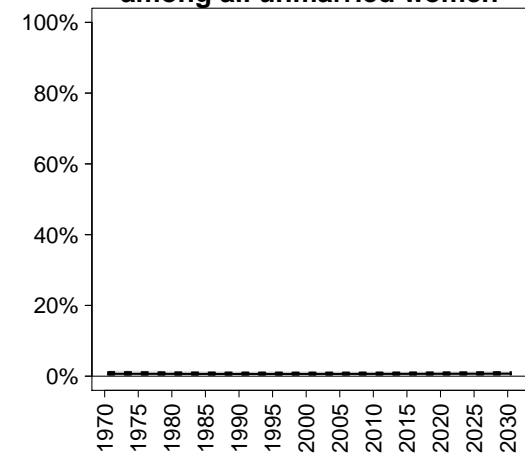

**Total demand**

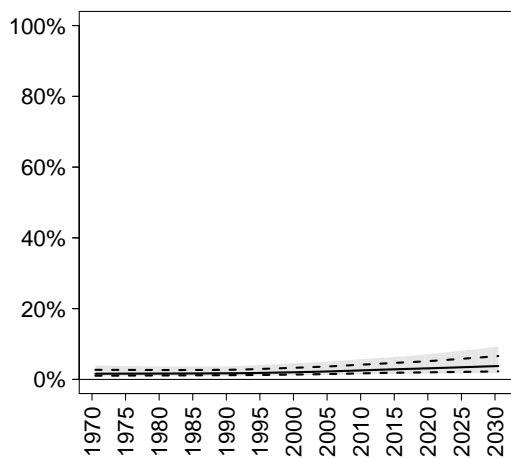

**Demand satisfied (any method)**

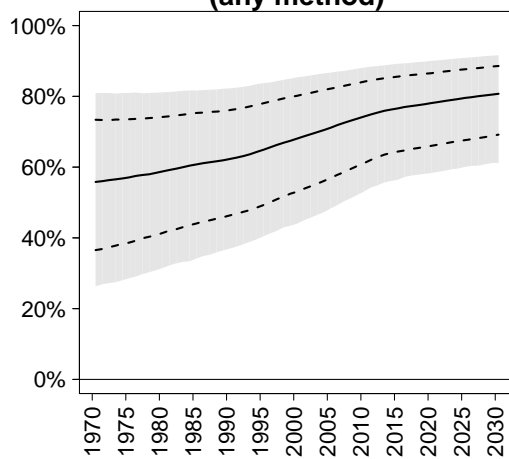

**Demand satisfied (modern methods)**

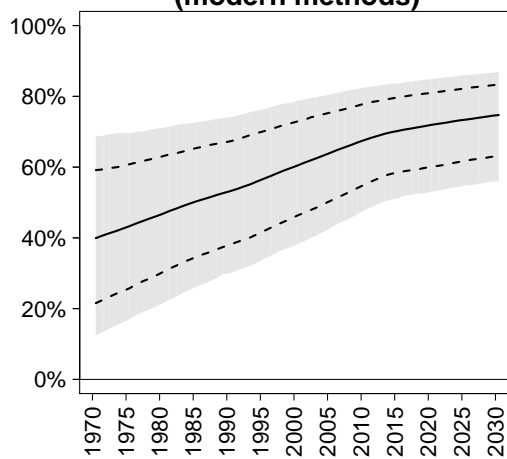

Europe --- Unmarried / Not In-Union

**CP (any)**

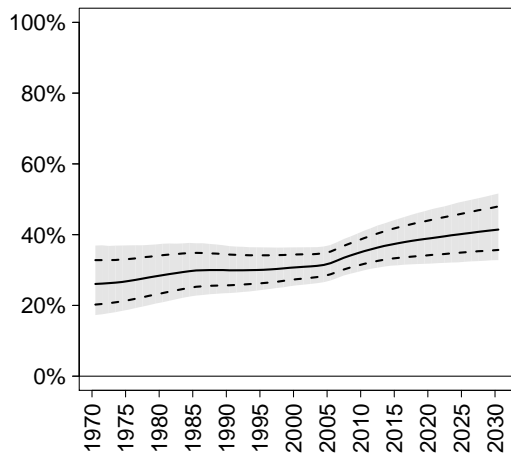

**CP (modern)**

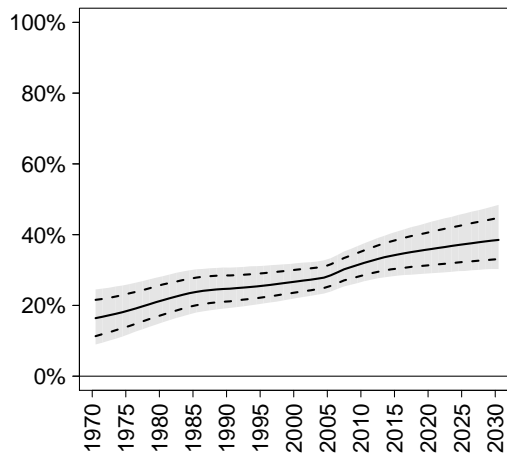

**CP (traditional)**

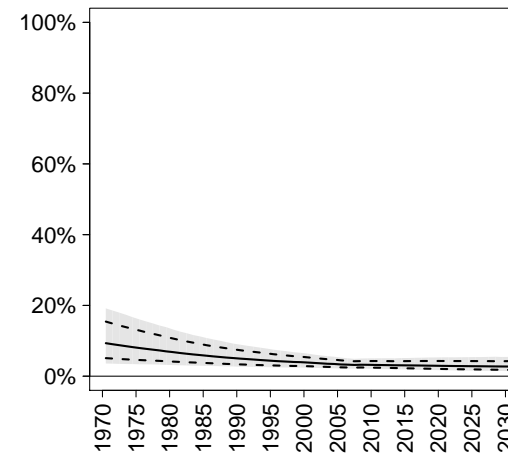

**Unmet need among all unmarried women**

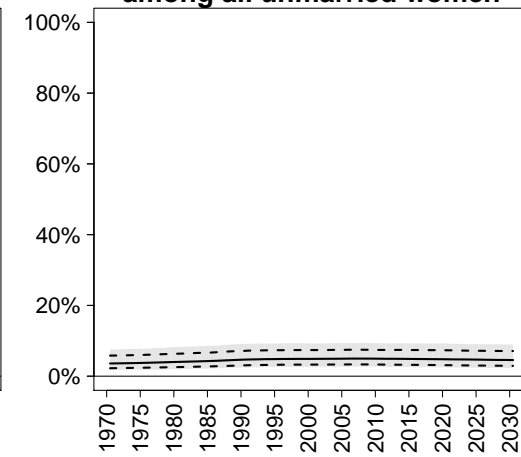

**Total demand**

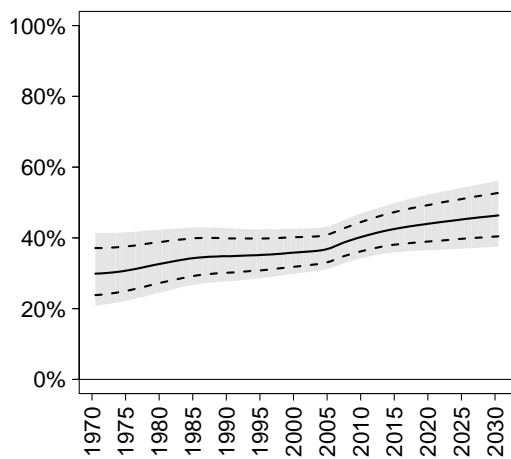

**Demand satisfied (any method)**

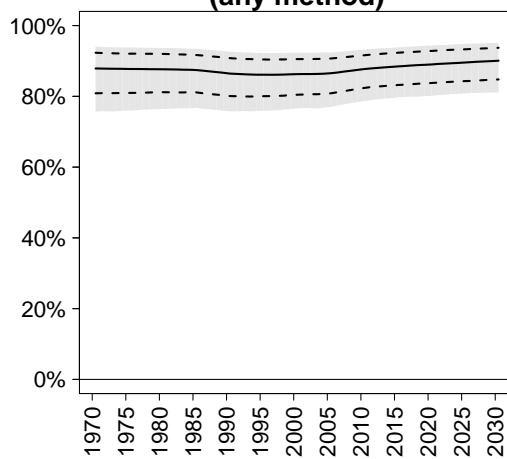

**Demand satisfied (modern methods)**

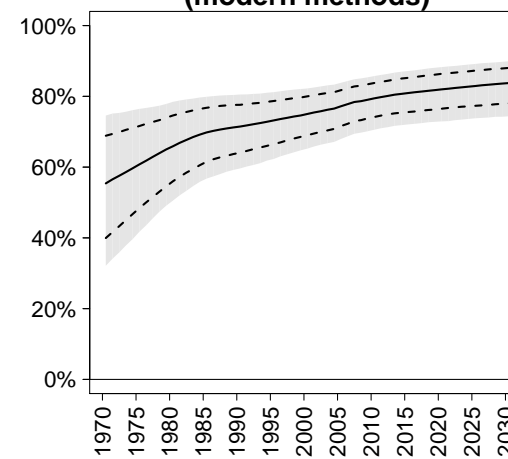



Eastern Europe --- Unmarried / Not In-Union

**CP (any)**

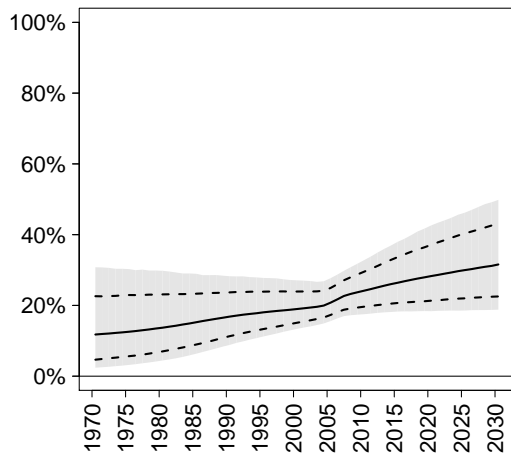

**CP (modern)**

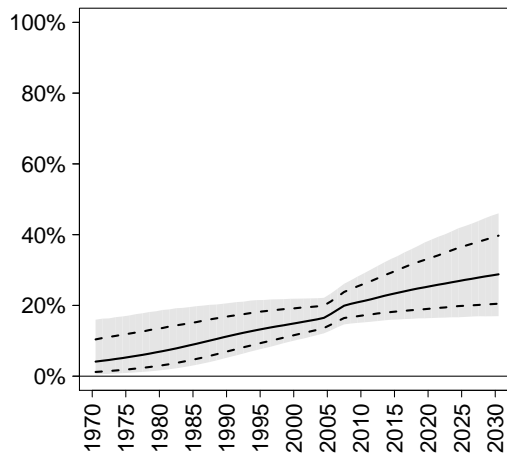

**CP (traditional)**

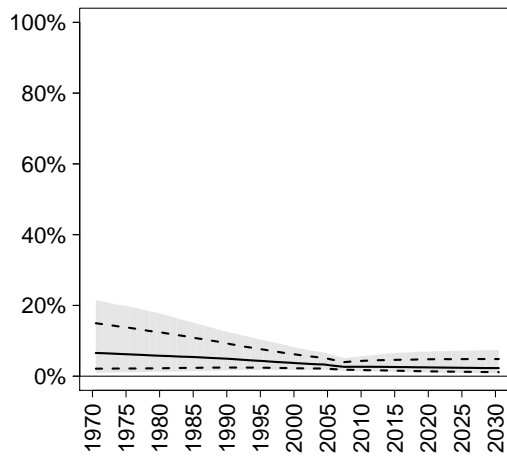

**Unmet need among all unmarried women**

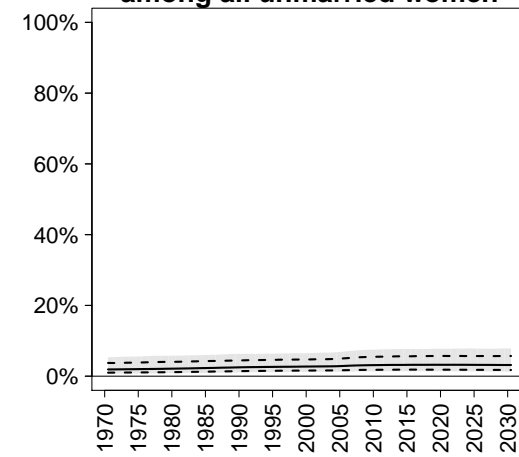

**Total demand**

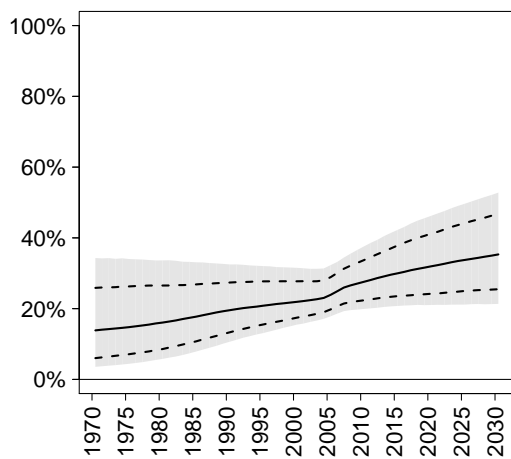

**Demand satisfied (any method)**

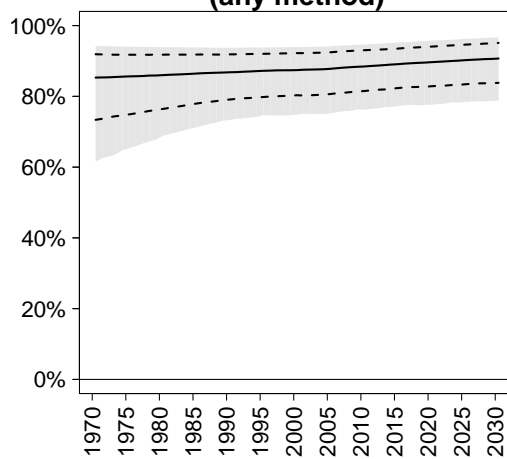

**Demand satisfied (modern methods)**

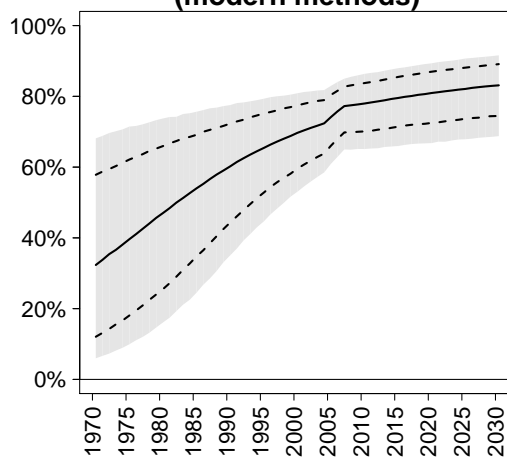

Northern Europe --- Unmarried / Not In-Union

**CP (any)**

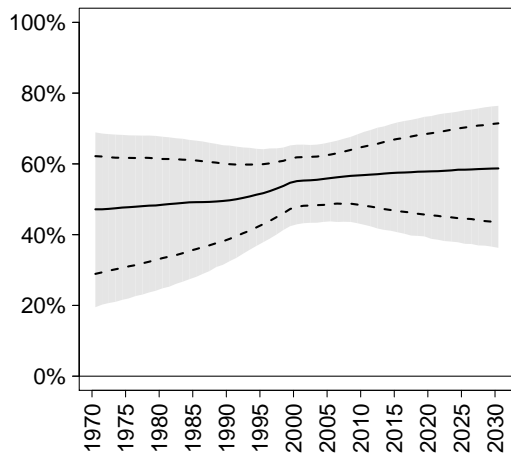

**CP (modern)**

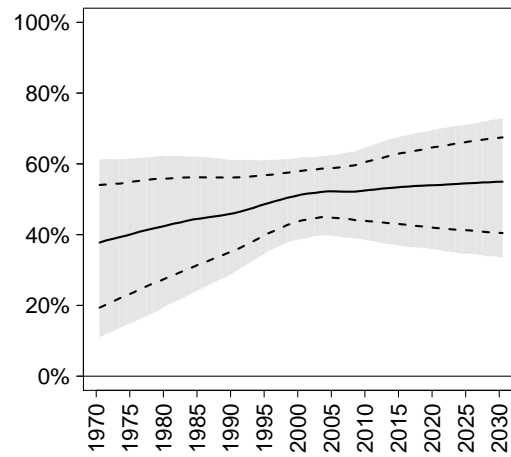

**CP (traditional)**

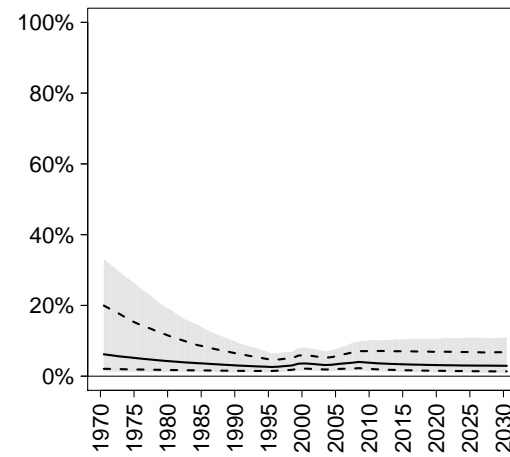

**Unmet need among all unmarried women**

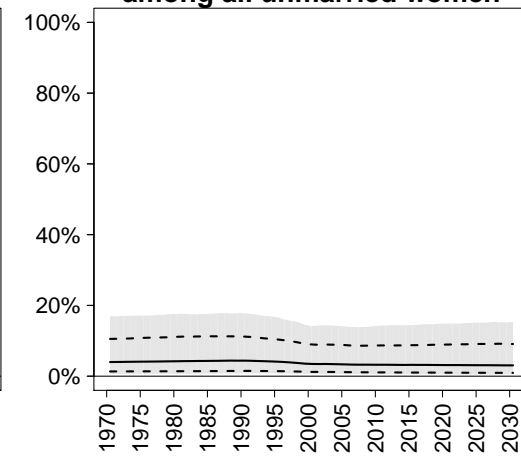

**Total demand**

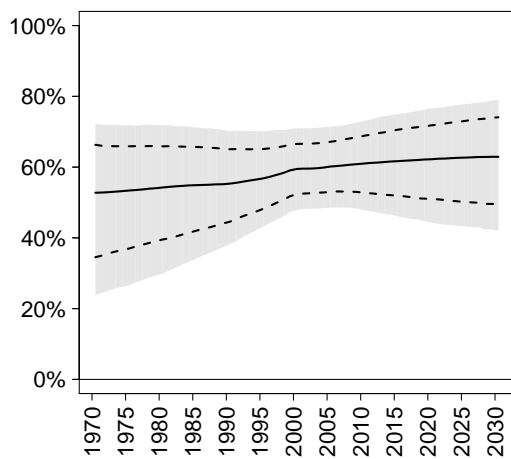

Southern Europe --- Unmarried / Not In-Union

**CP (any)**

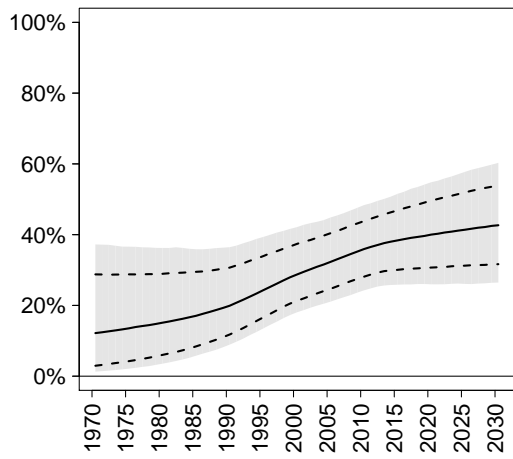

**CP (modern)**

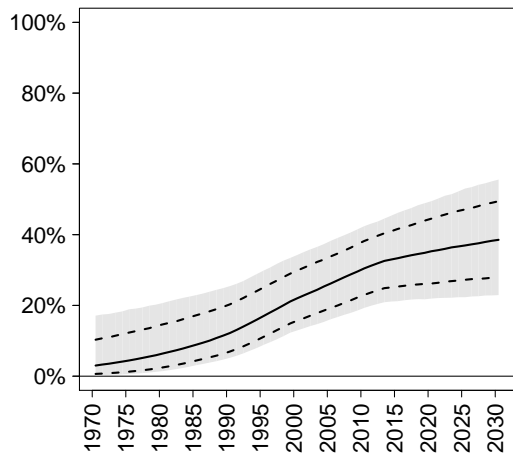

**CP (traditional)**

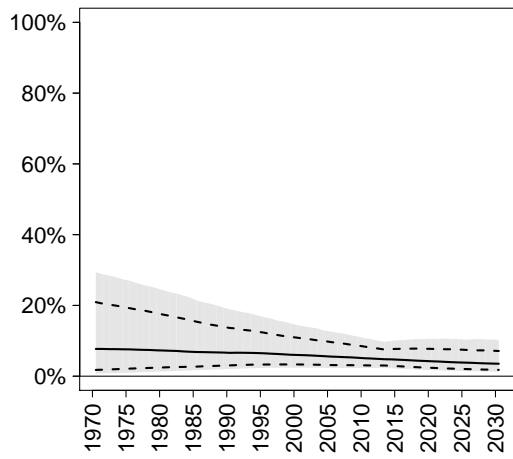

**Unmet need among all unmarried women**

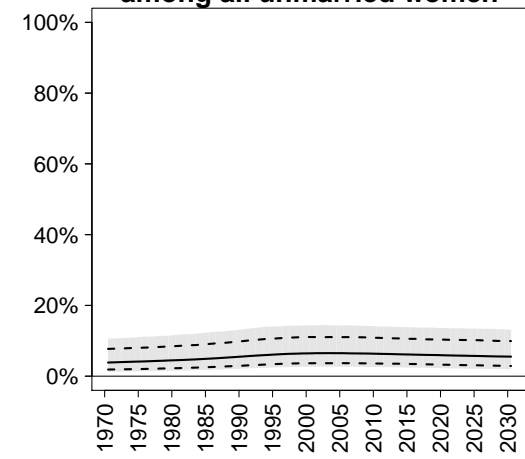

**Total demand**

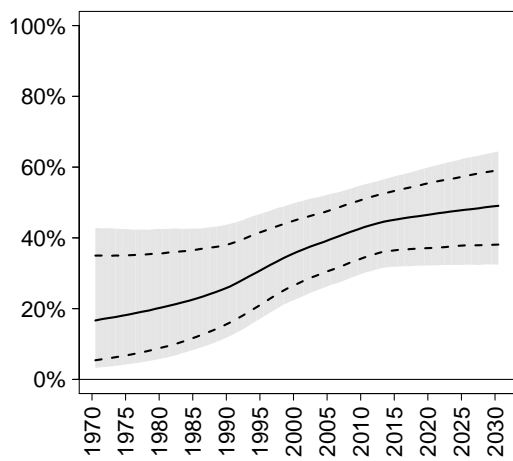

**Demand satisfied (any method)**

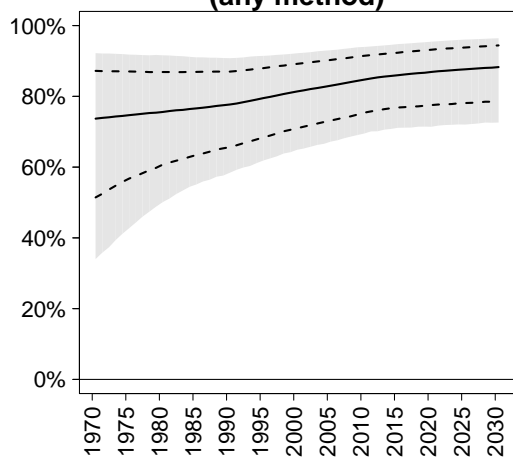

**Demand satisfied (modern methods)**

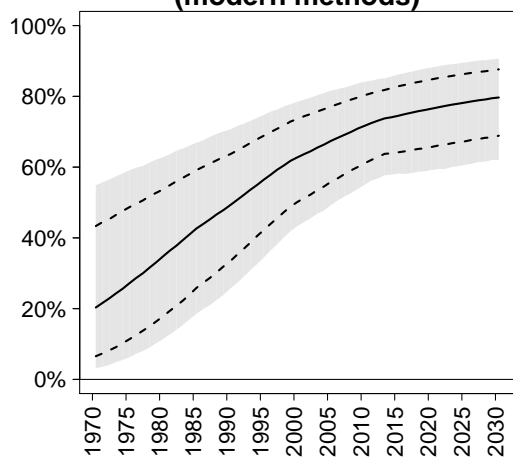

Western Europe --- Unmarried / Not In-Union

**CP (any)**

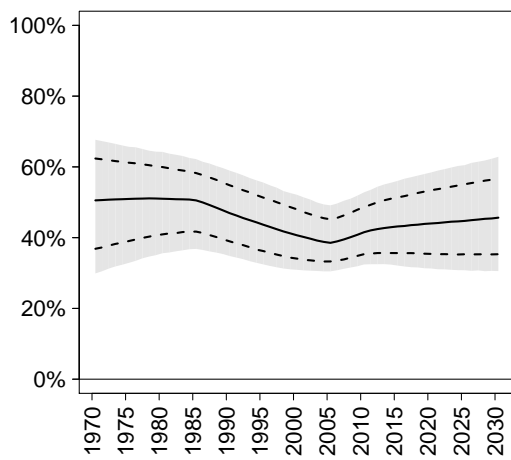

**CP (modern)**

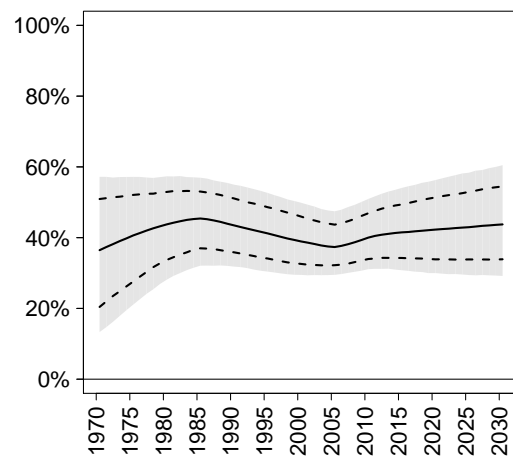

**CP (traditional)**

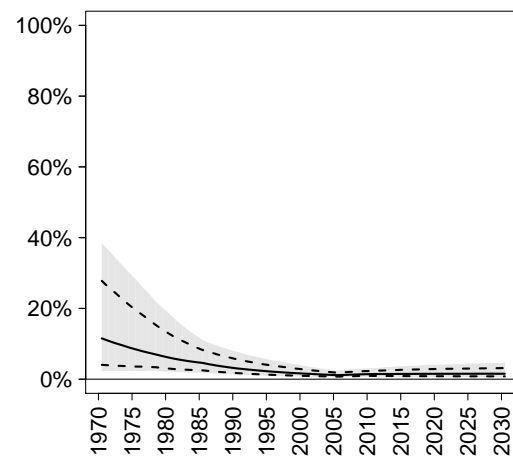

**Unmet need among all unmarried women**

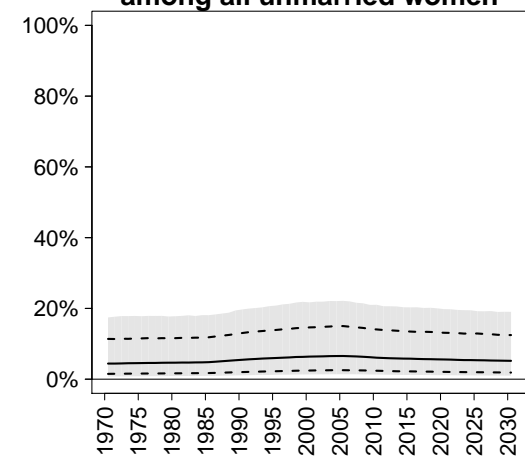

**Total demand**

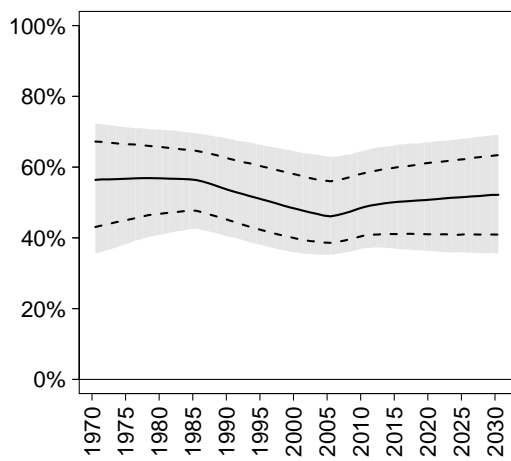

Latin America and the Caribbean --- Unmarried / Not In-Union

**CP (any)**

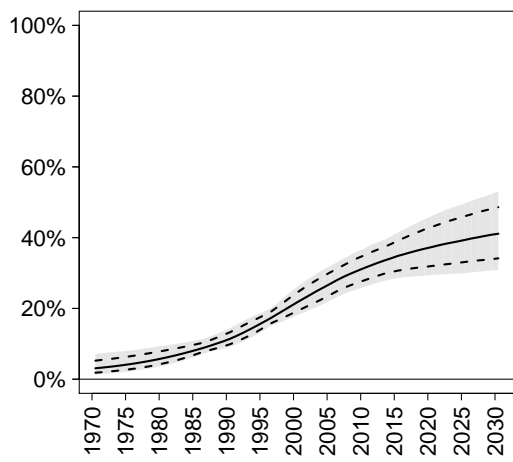

**CP (modern)**

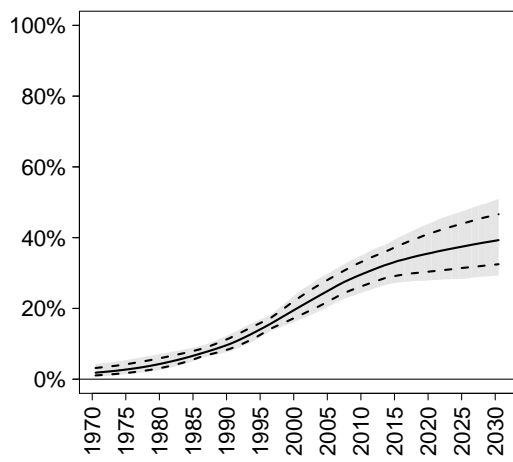

**CP (traditional)**

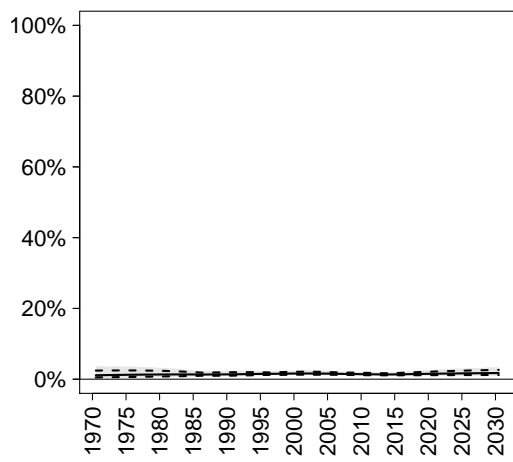

**Unmet need among all unmarried women**

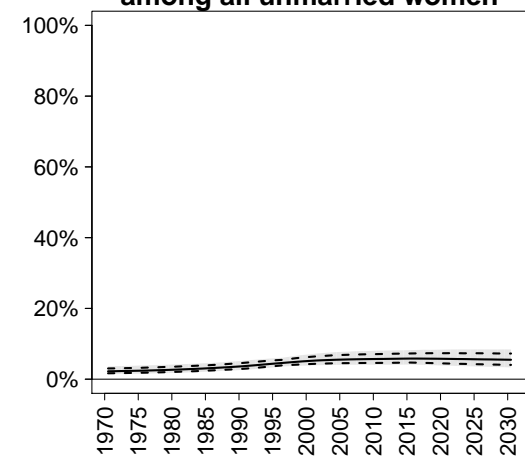

**Total demand**

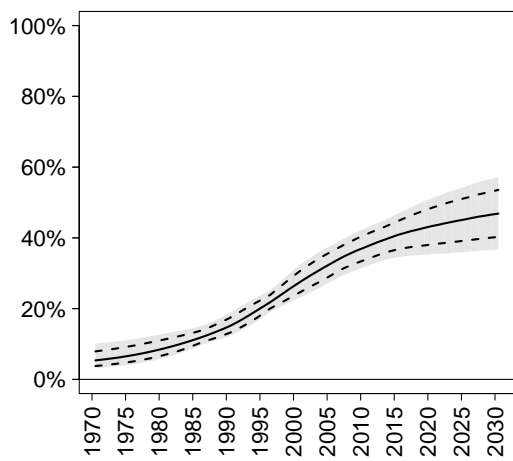

Caribbean --- Unmarried / Not In-Union

**CP (any)**

**CP (modern)**

**CP (traditional)**

**Unmet need  
among all unmarried women**

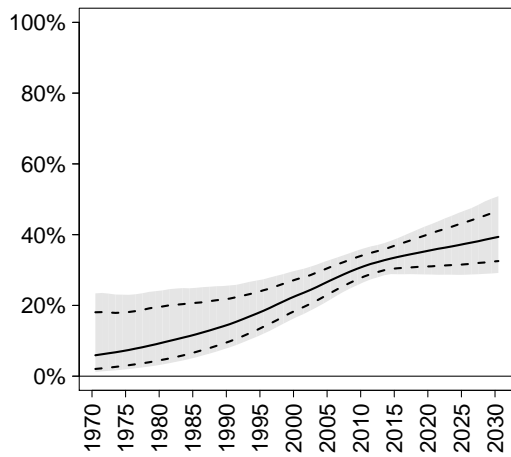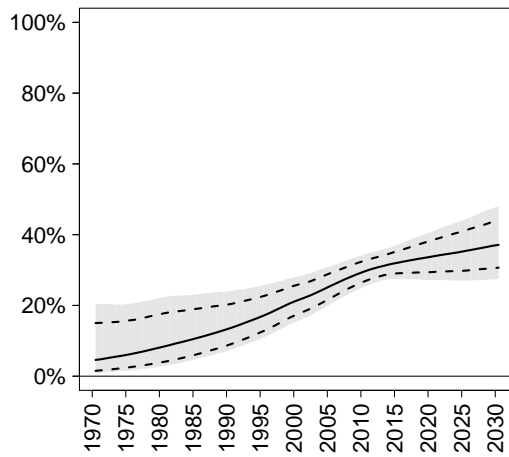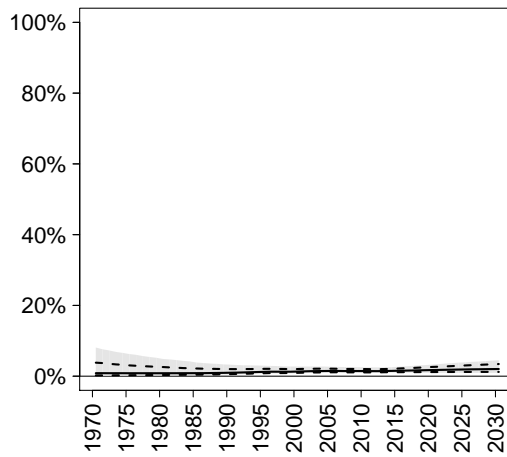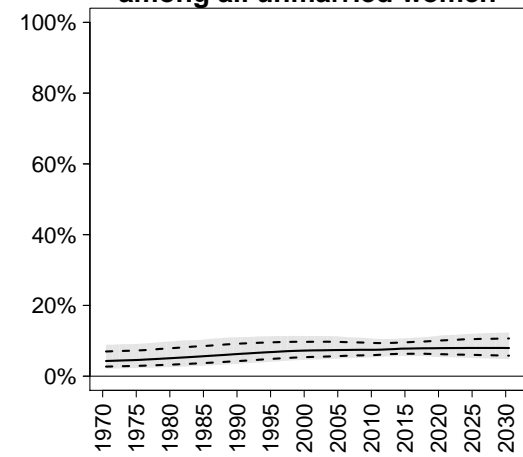

**Total demand**

**Demand satisfied  
(any method)**

**Demand satisfied  
(modern methods)**

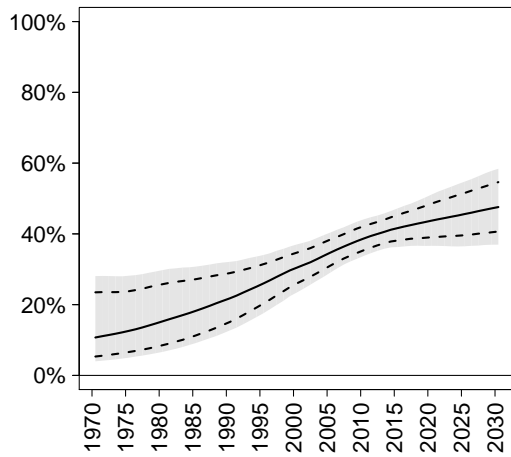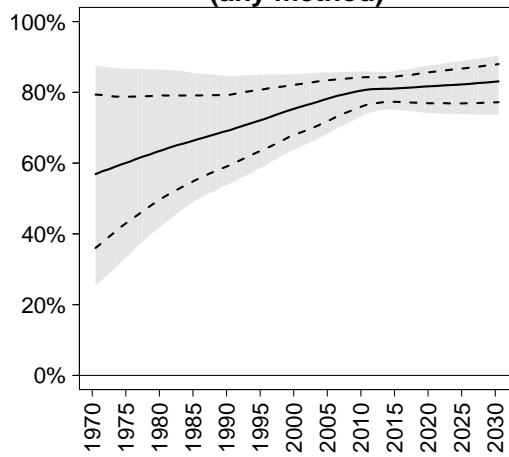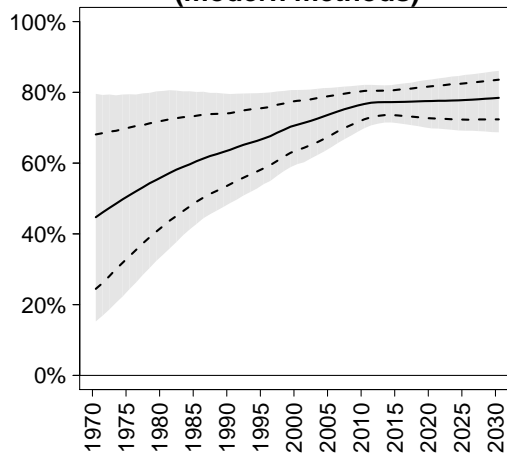

Central America --- Unmarried / Not In-Union

**CP (any)**

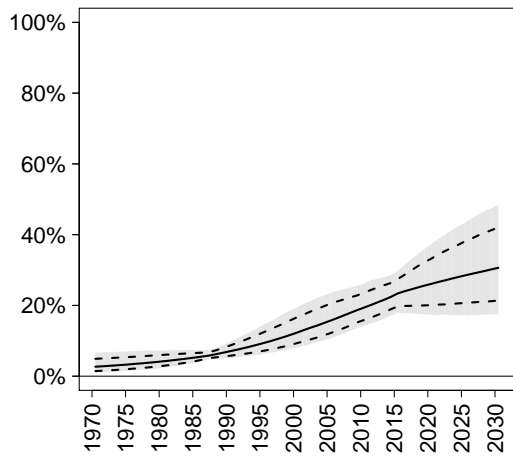

**CP (modern)**

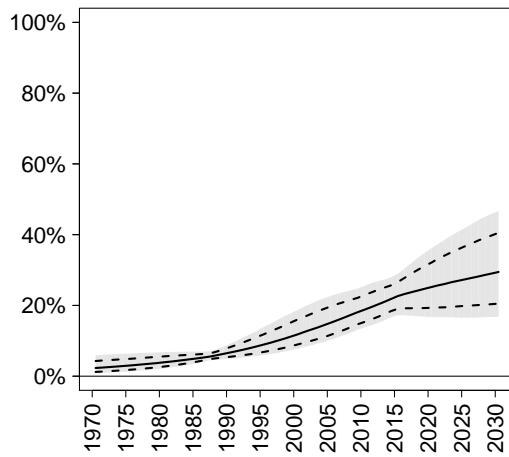

**CP (traditional)**

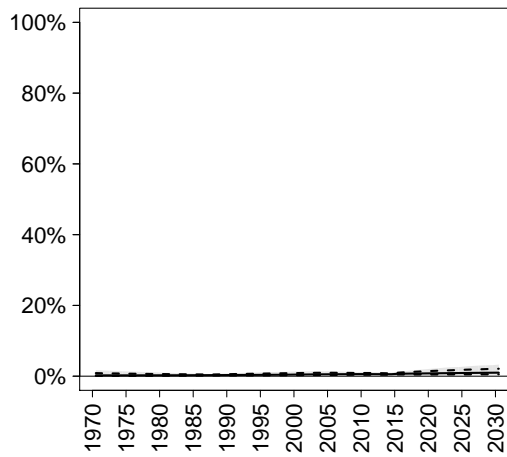

**Unmet need among all unmarried women**

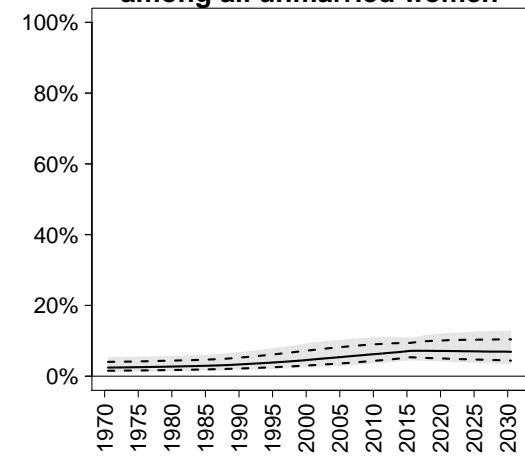

**Total demand**

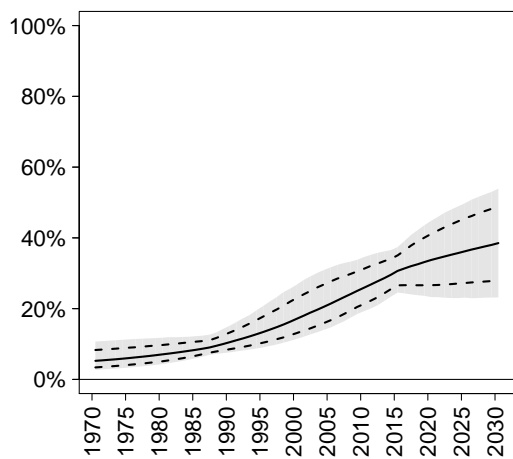

**Demand satisfied (any method)**

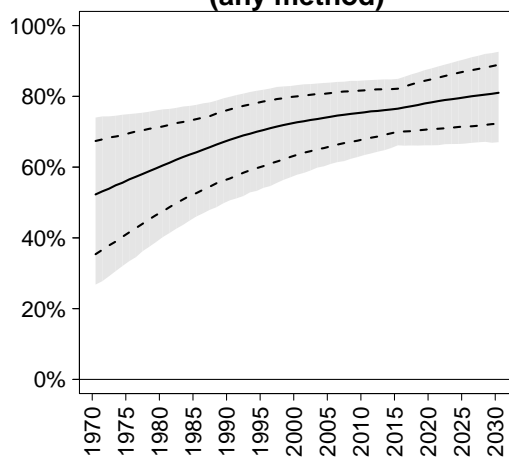

**Demand satisfied (modern methods)**

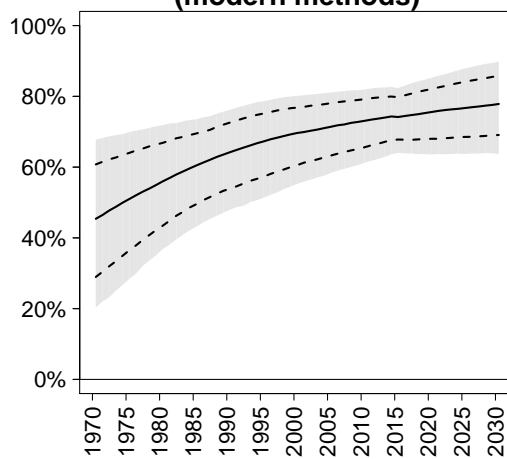

South America --- Unmarried / Not In-Union

CP (any)

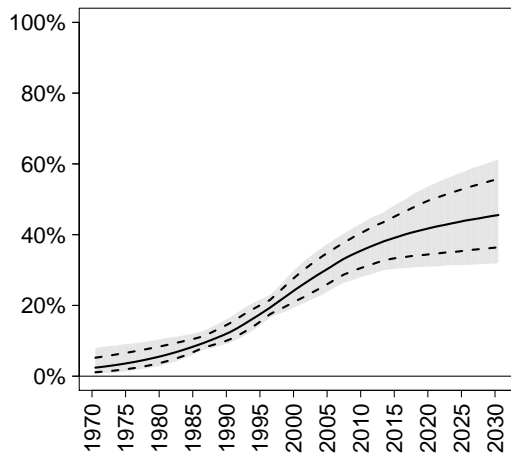

CP (modern)

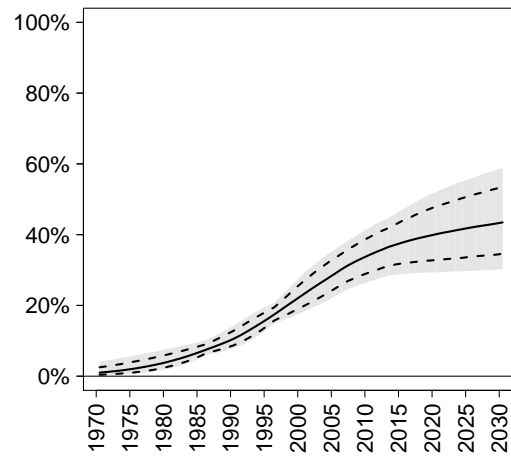

CP (traditional)

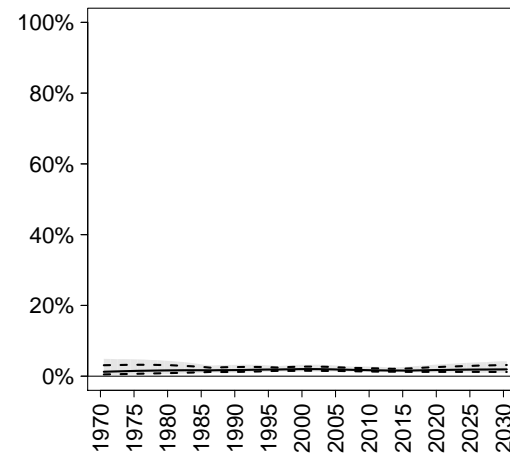

Unmet need among all unmarried women

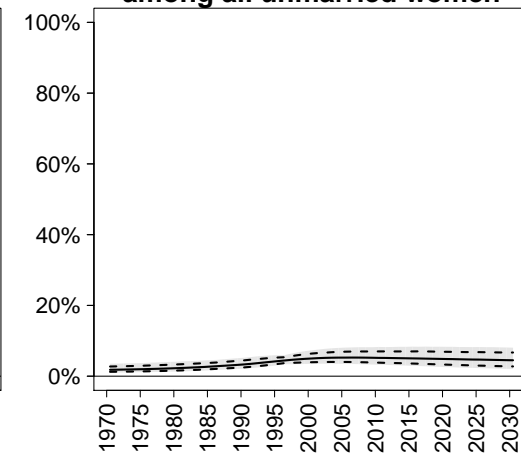

Total demand

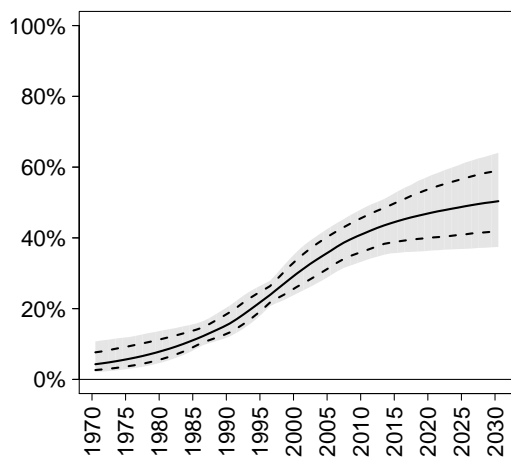



Northern America --- Unmarried / Not In-Union

**CP (any)**

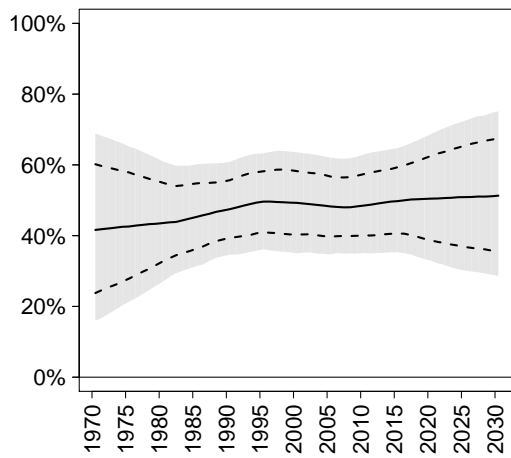

**CP (modern)**

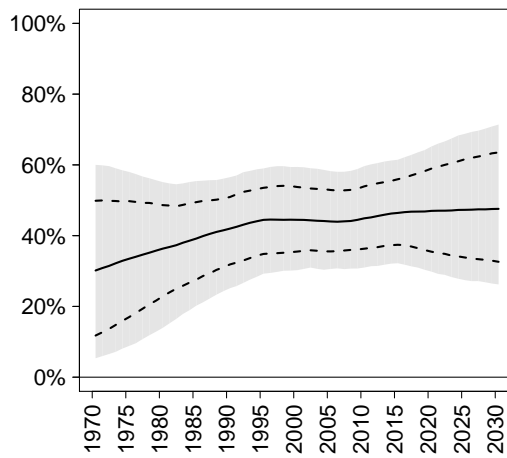

**CP (traditional)**

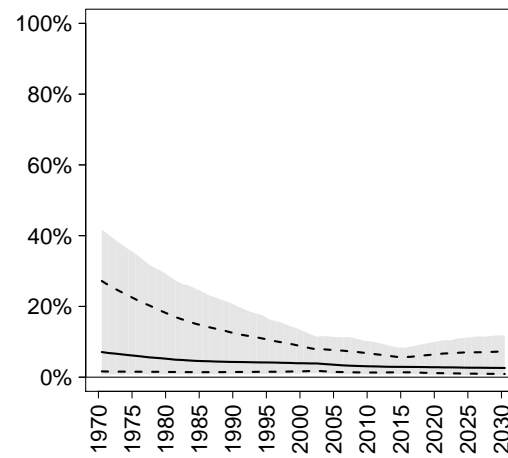

**Unmet need among all unmarried women**

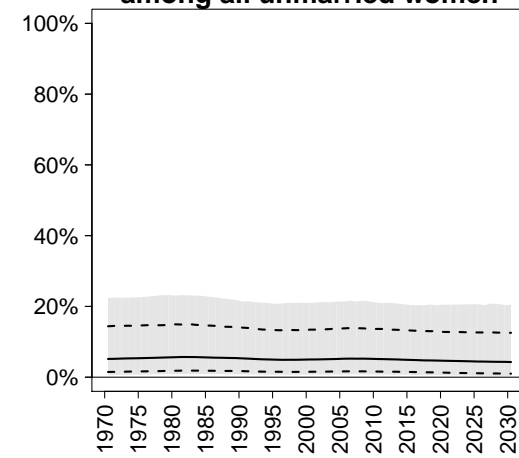

**Total demand**

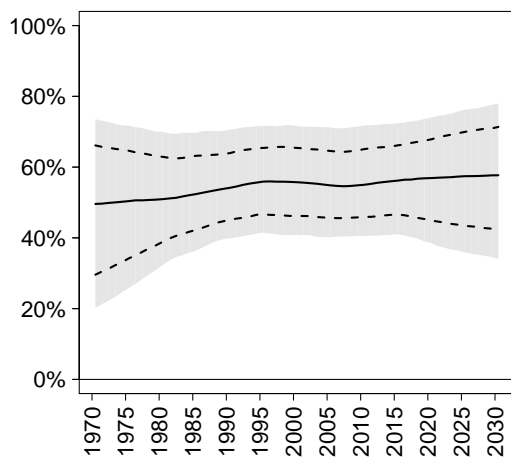

**Demand satisfied (any method)**

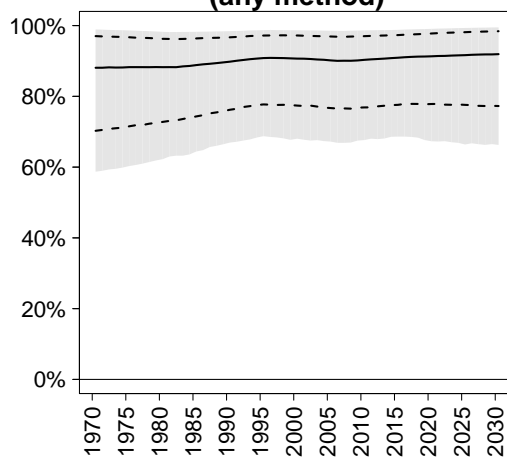

**Demand satisfied (modern methods)**

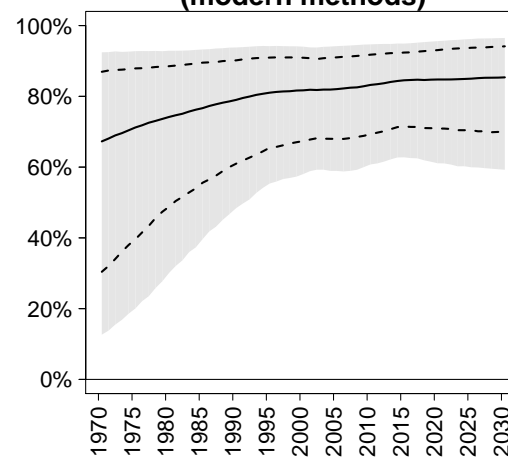

Oceania --- Unmarried / Not In-Union

**CP (any)**

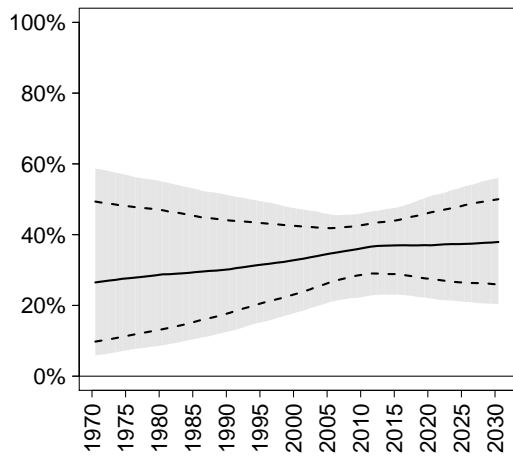

**CP (modern)**

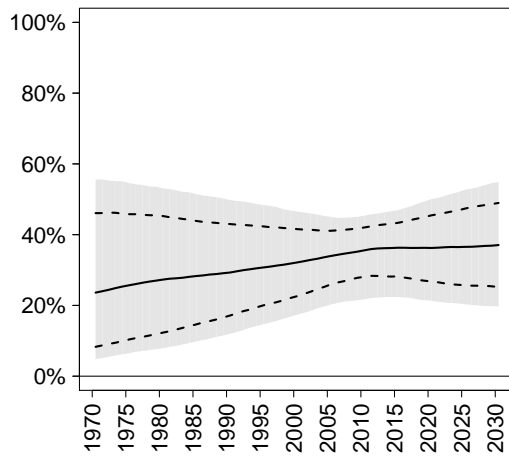

**CP (traditional)**

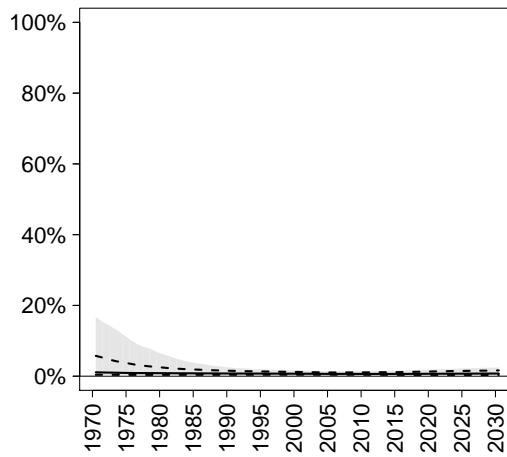

**Unmet need among all unmarried women**

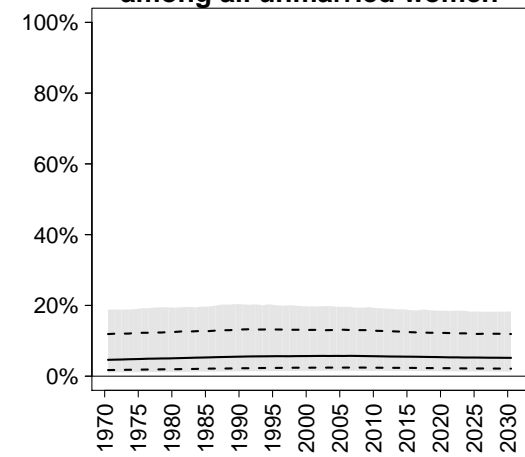

**Total demand**

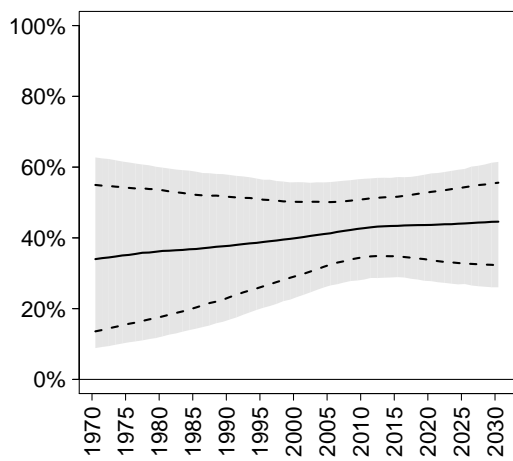

**Demand satisfied (any method)**

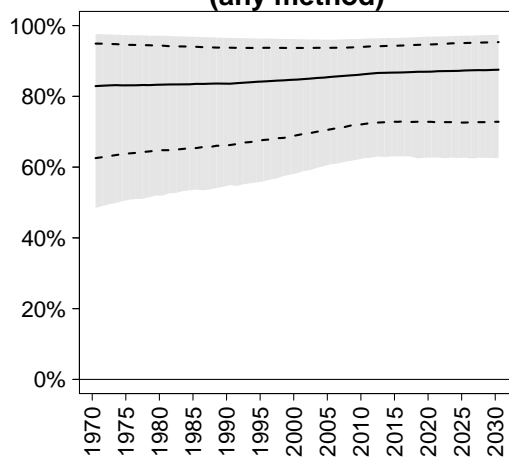

**Demand satisfied (modern methods)**

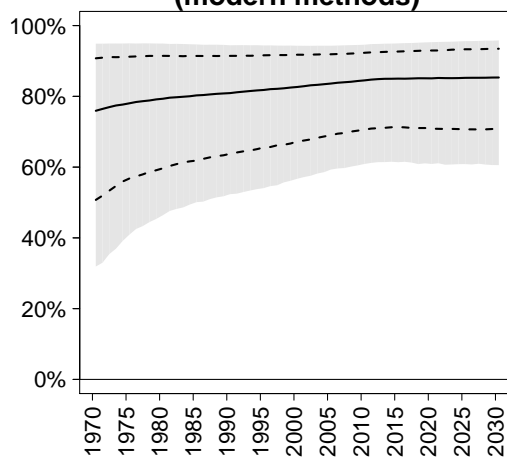

Australia and New Zealand --- Unmarried / Not In-Union

**CP (any)**

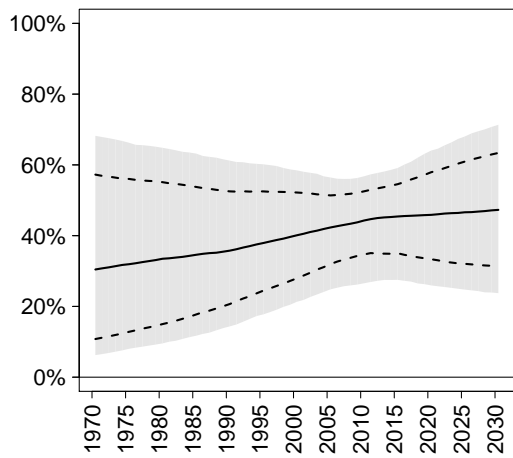

**CP (modern)**

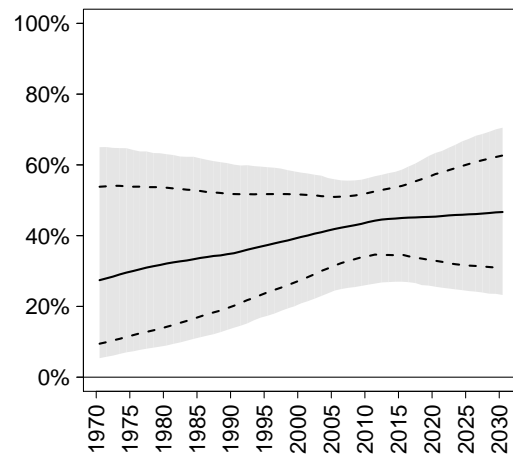

**CP (traditional)**

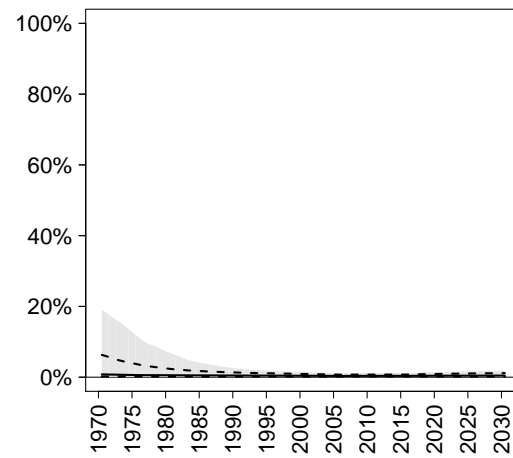

**Unmet need among all unmarried women**

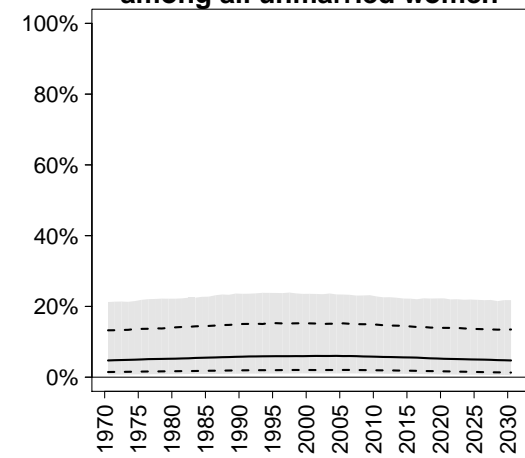

**Total demand**

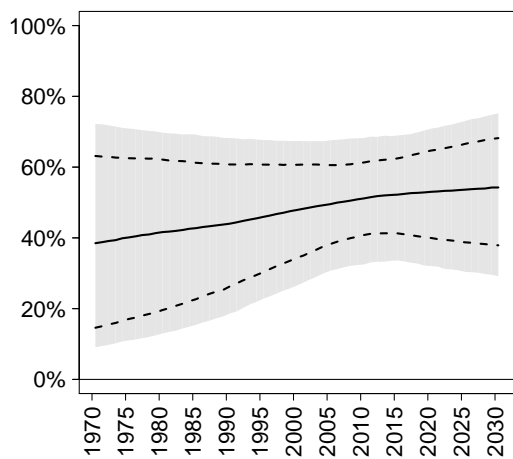

Melanesia --- Unmarried / Not In-Union

**CP (any)**

**CP (modern)**

**CP (traditional)**

**Unmet need  
among all unmarried women**

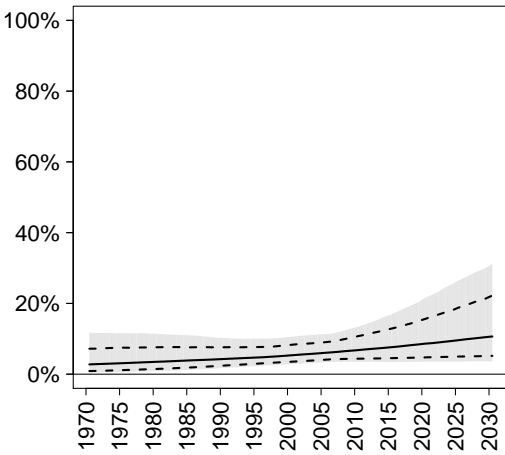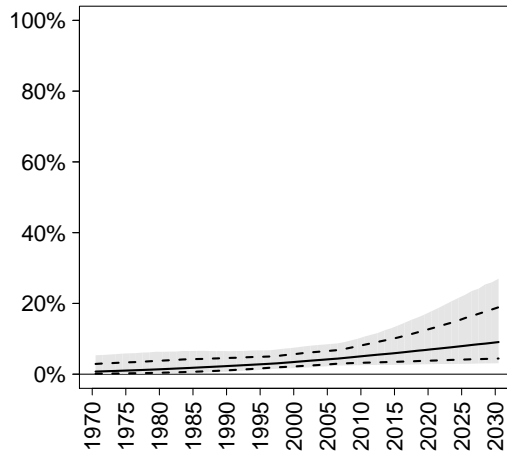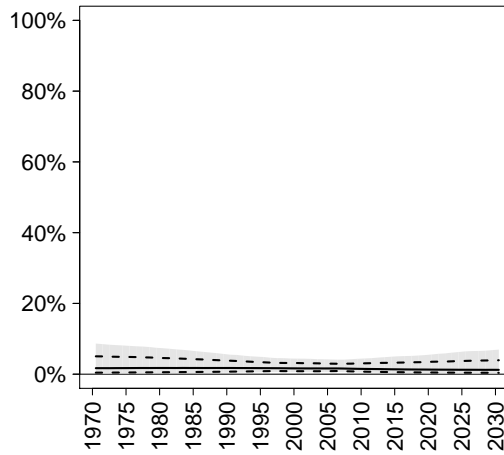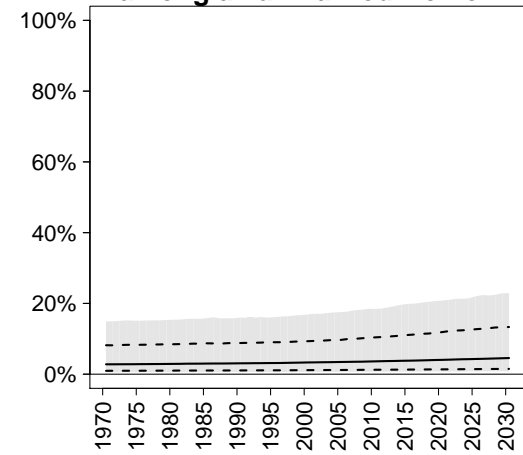

**Total demand**

**Demand satisfied  
(any method)**

**Demand satisfied  
(modern methods)**

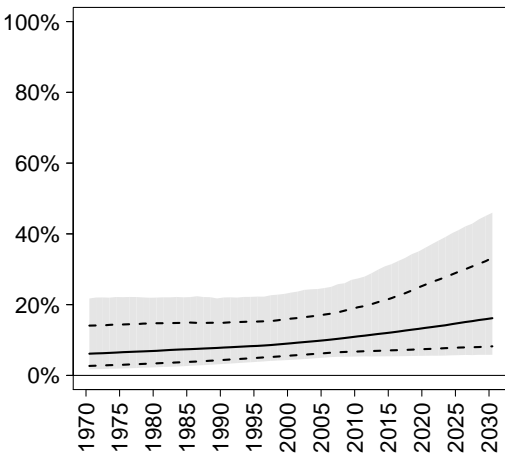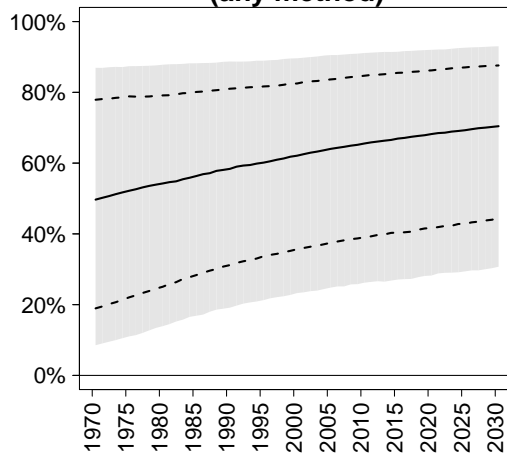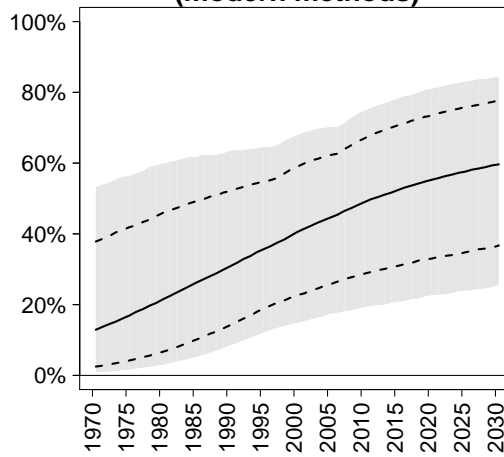

Micronesia --- Unmarried / Not In-Union

**CP (any)**

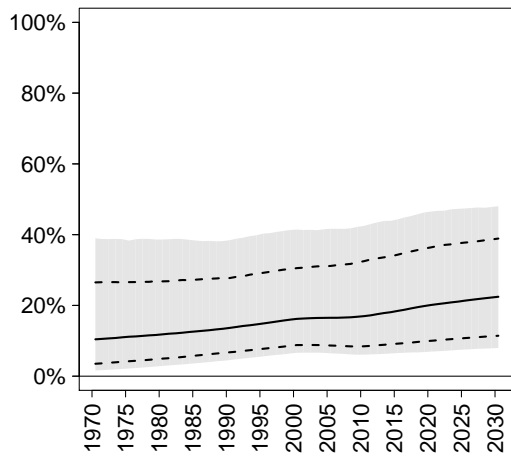

**CP (modern)**

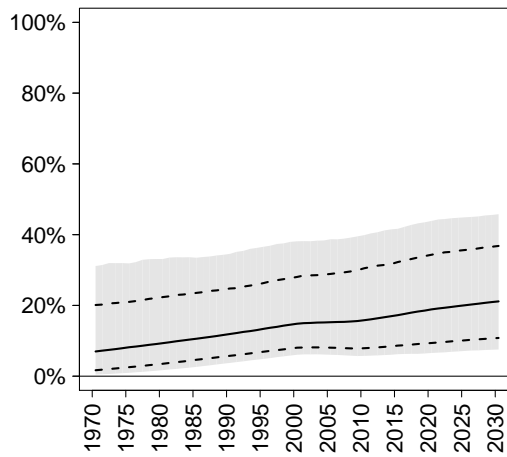

**CP (traditional)**

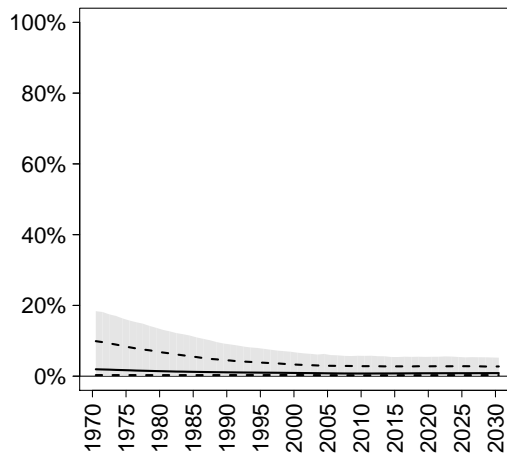

**Unmet need among all unmarried women**

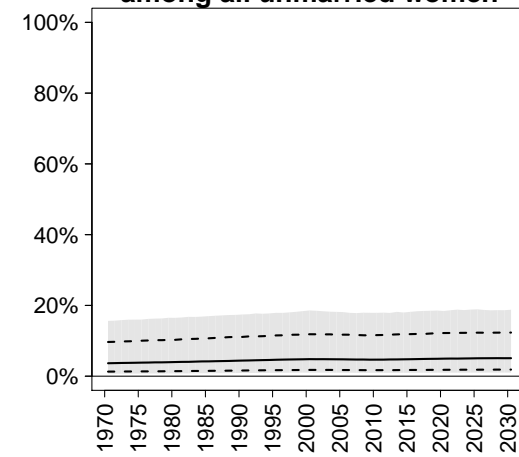

**Total demand**

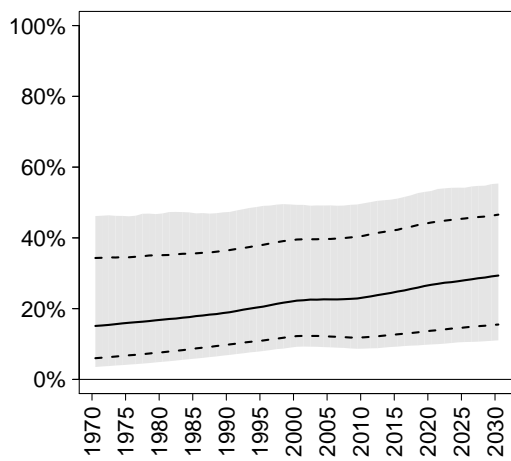

**Demand satisfied (any method)**

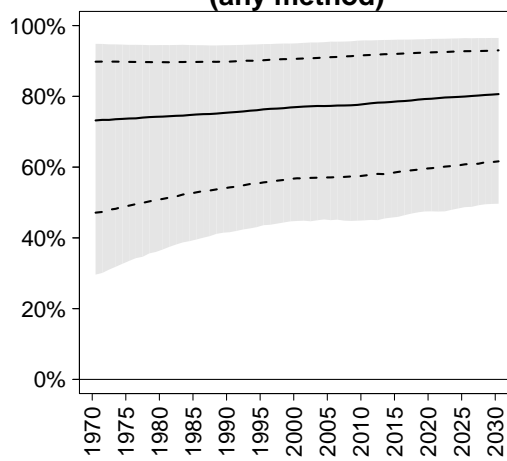

**Demand satisfied (modern methods)**

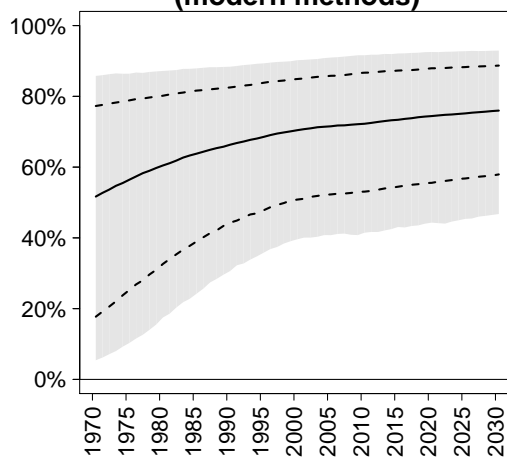

Polynesia --- Unmarried / Not In-Union

**CP (any)**

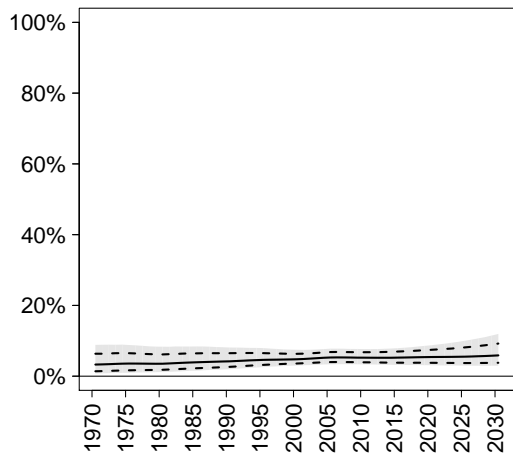

**CP (modern)**

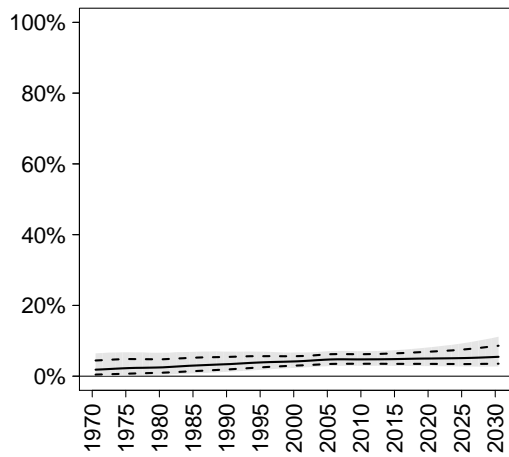

**CP (traditional)**

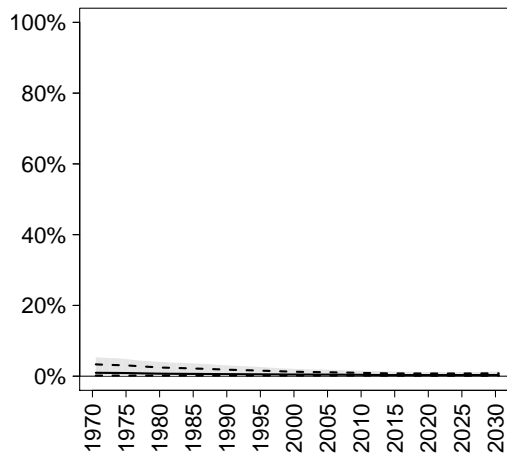

**Unmet need among all unmarried women**

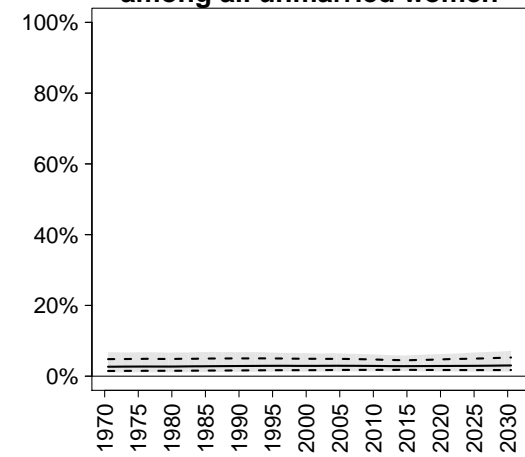

**Total demand**

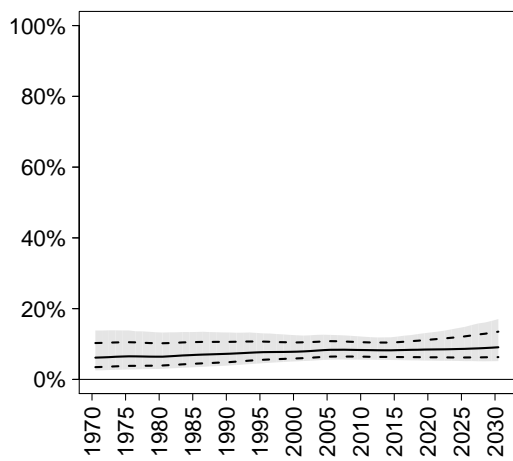

## 2 Married or in a union women of reproductive age

### 2.1 Countries and areas

Afghanistan (Southern Asia) --- Married / In-Union

CP (any)

CP (modern)

CP (traditional)

Unmet need

Total demand

Demand satisfied (any method)

Demand satisfied (modern methods)

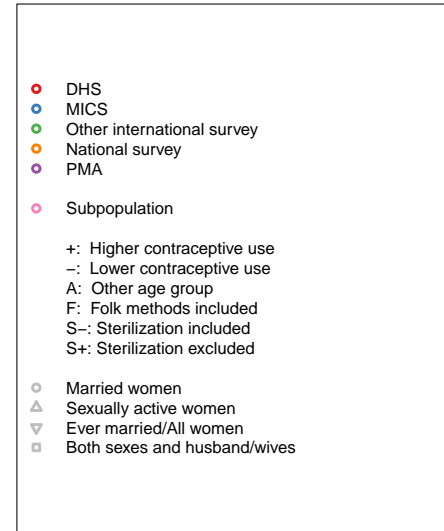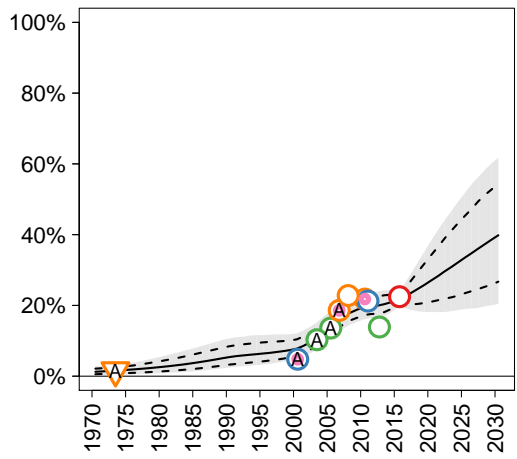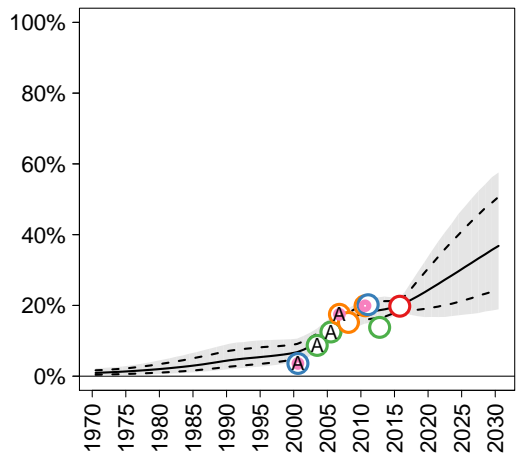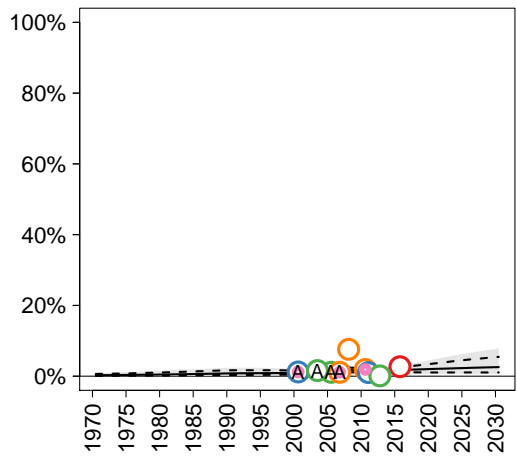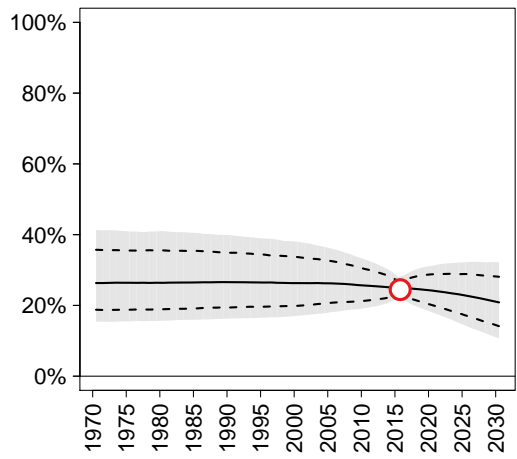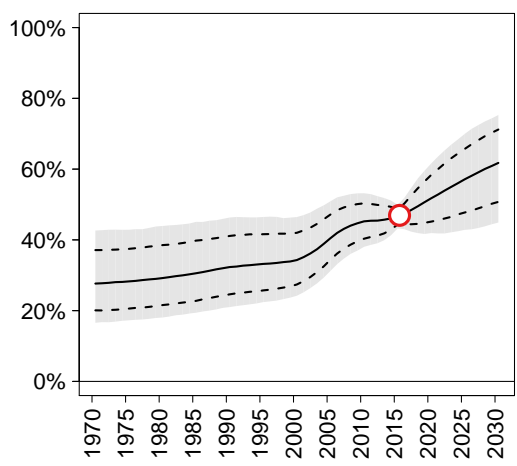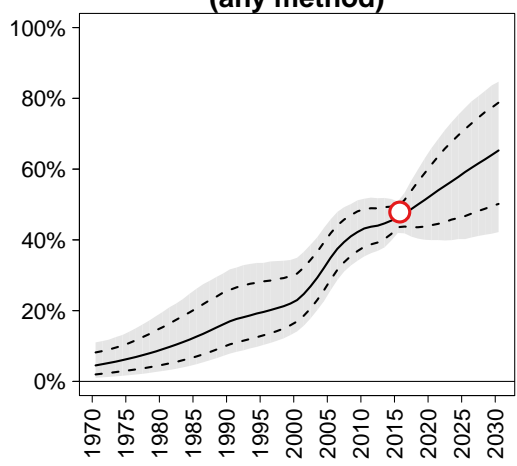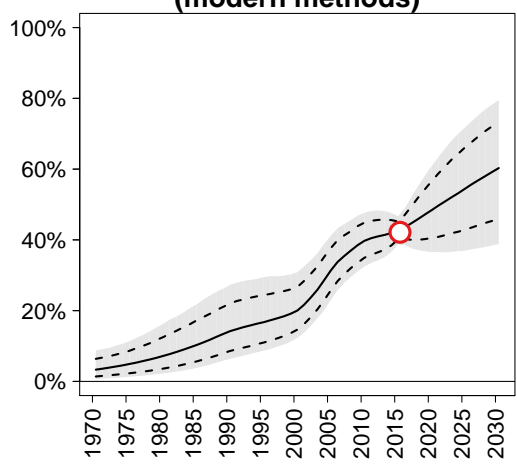



Albania (Southern Europe) --- Married / In-Union

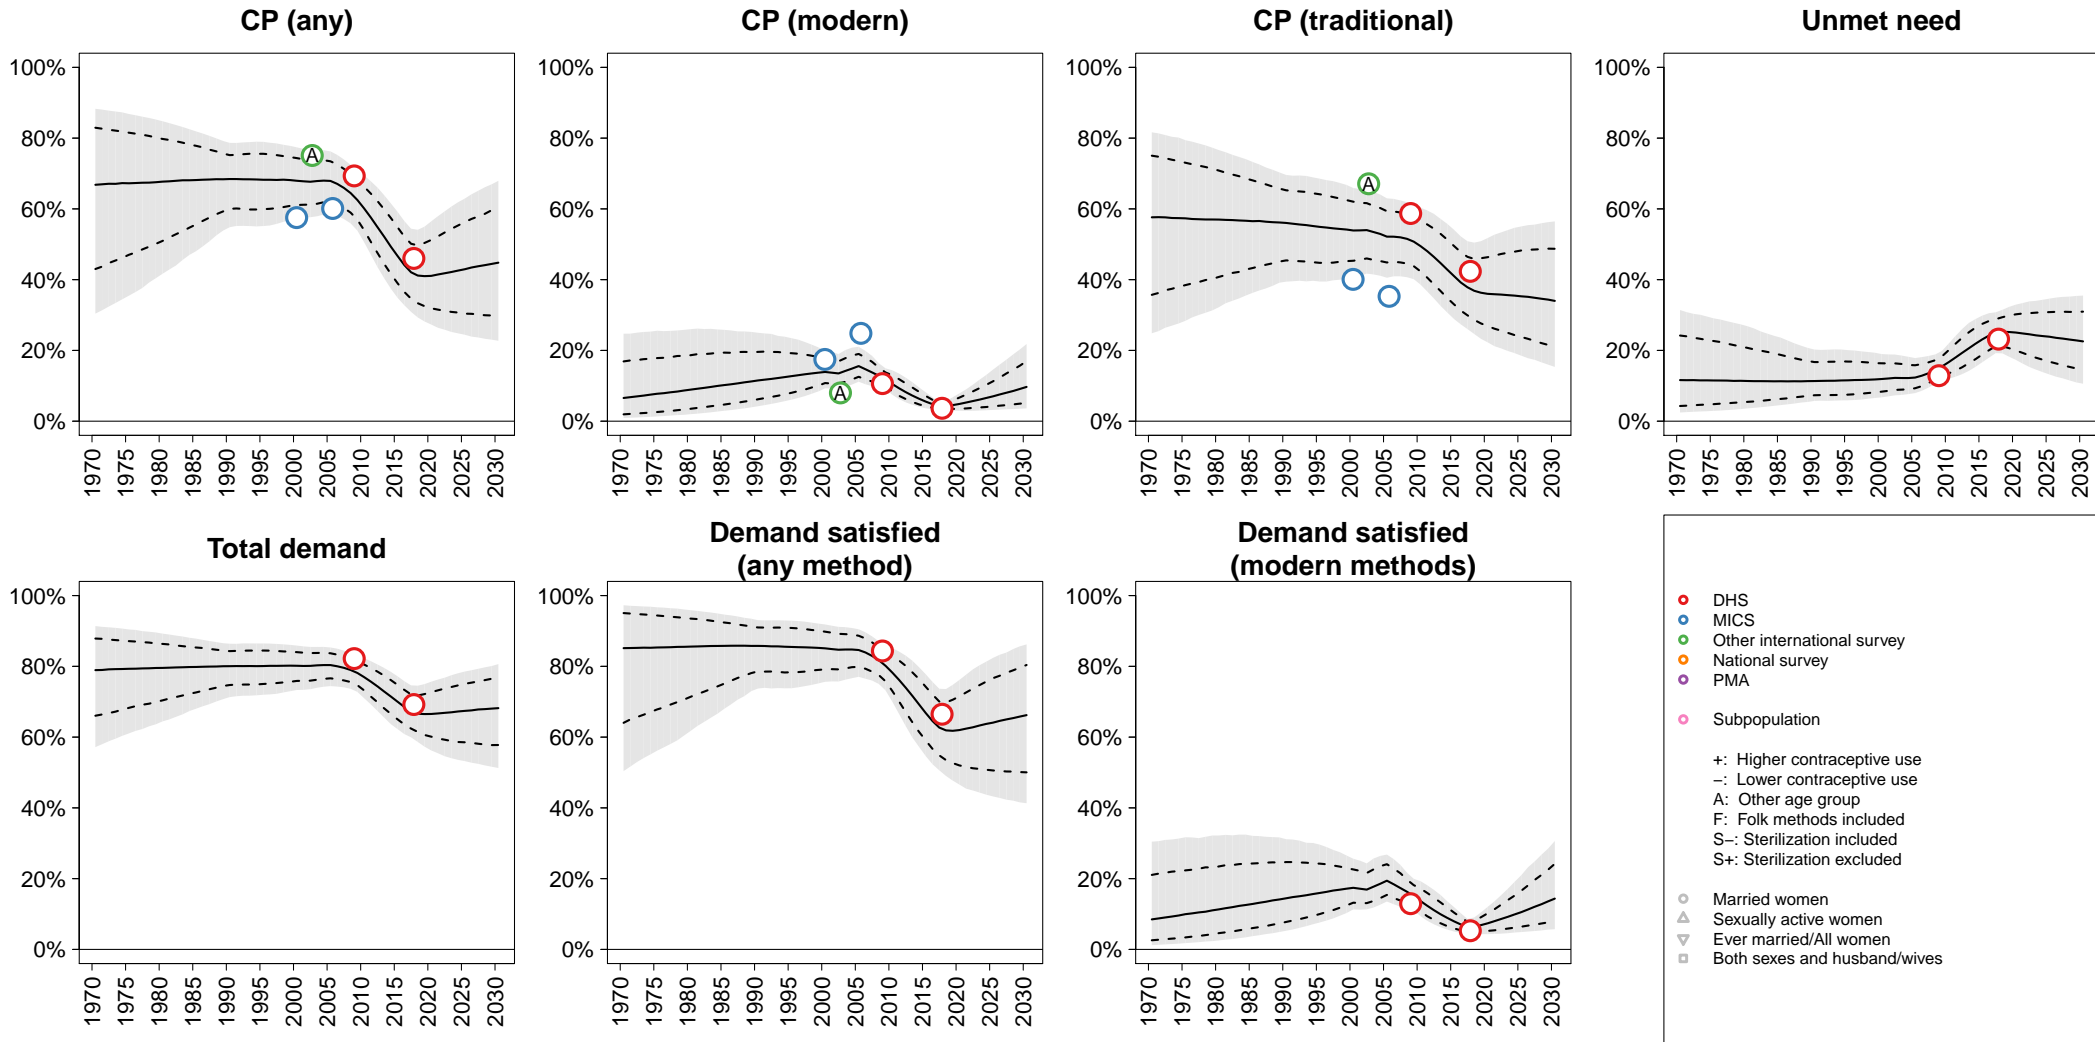

Algeria (Northern Africa) --- Married / In-Union

CP (any)

CP (modern)

CP (traditional)

Unmet need

Total demand

Demand satisfied (any method)

Demand satisfied (modern methods)

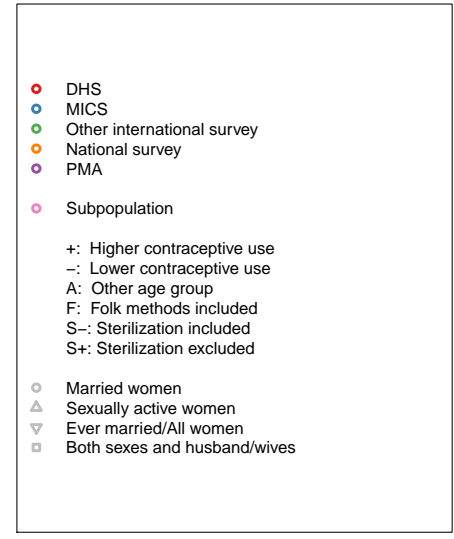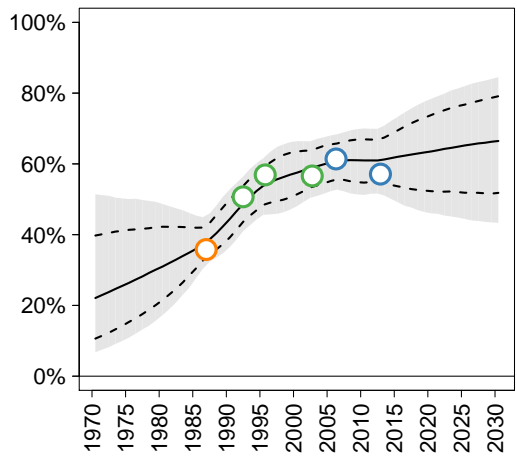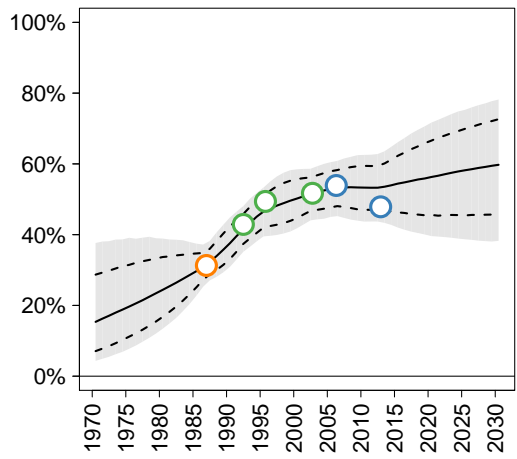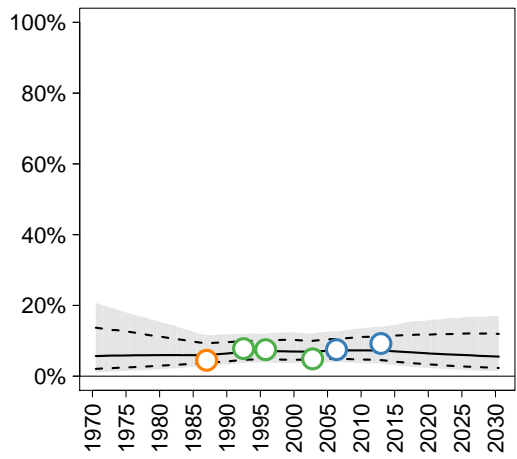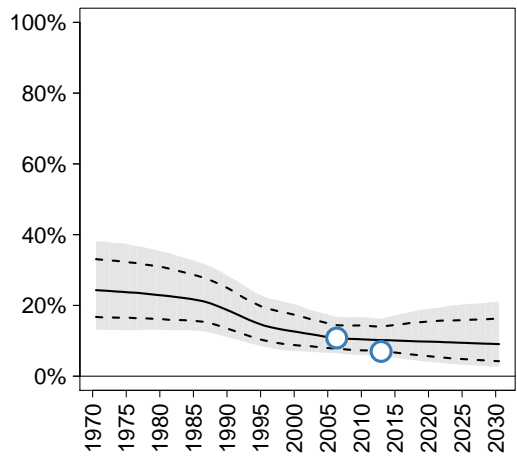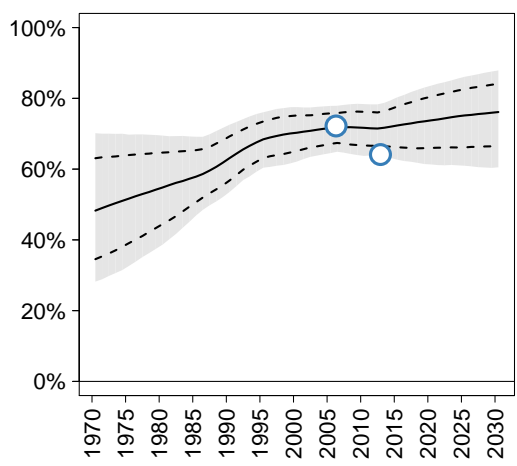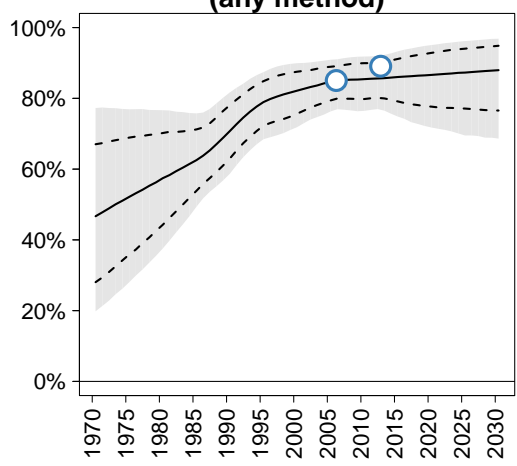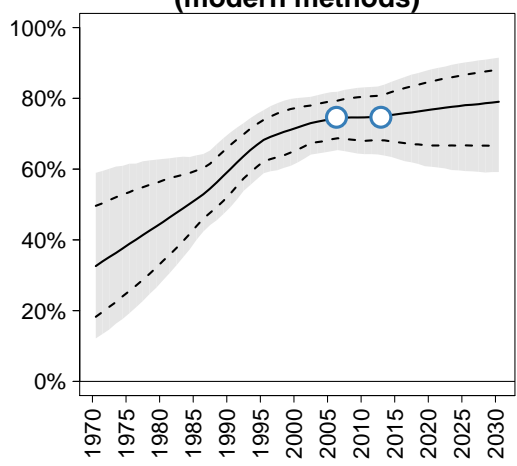

Angola (Middle Africa) --- Married / In-Union

CP (any)

CP (modern)

CP (traditional)

Unmet need

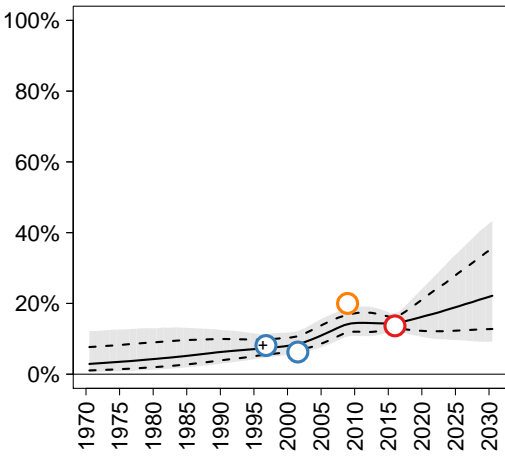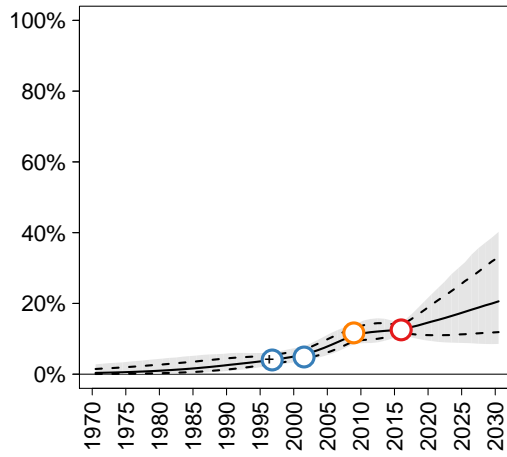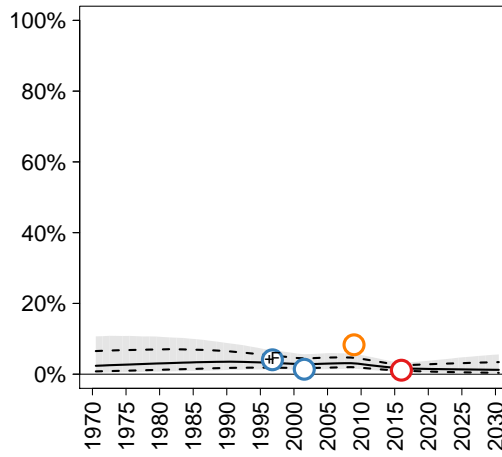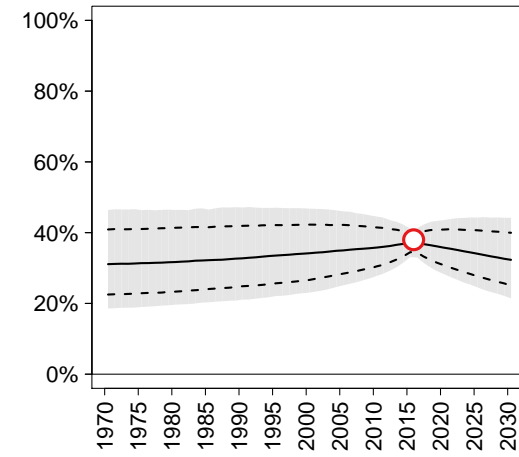

Total demand

Demand satisfied (any method)

Demand satisfied (modern methods)

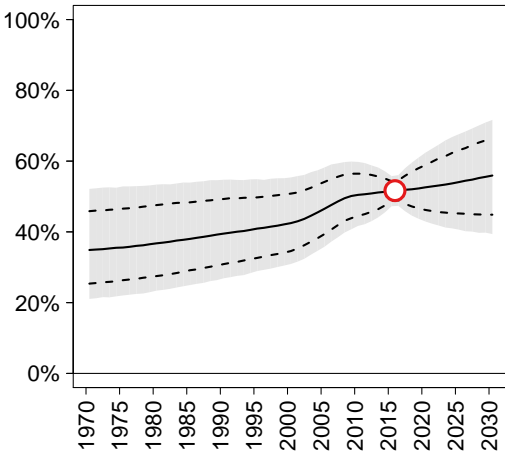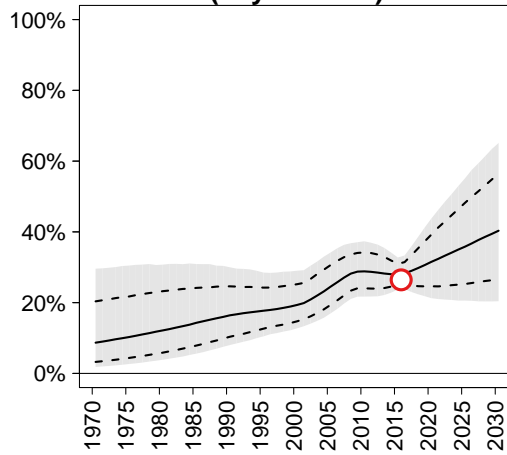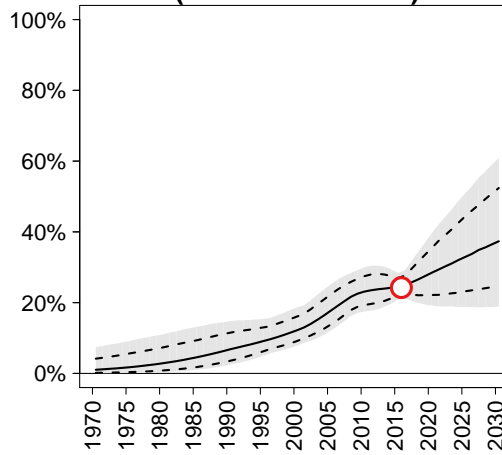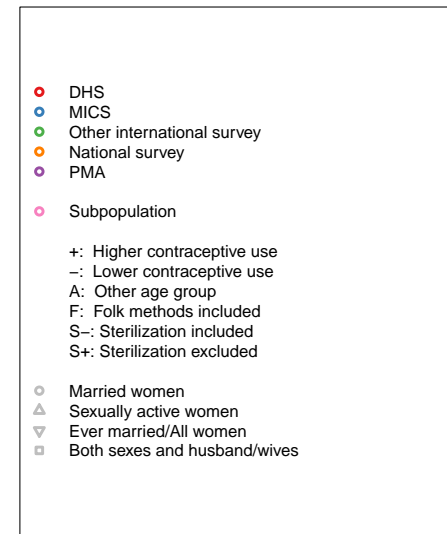

Antigua and Barbuda (Caribbean) --- Married / In-Union

CP (any)

CP (modern)

CP (traditional)

Unmet need

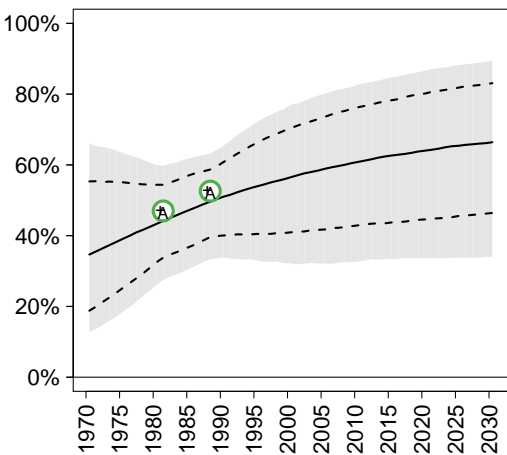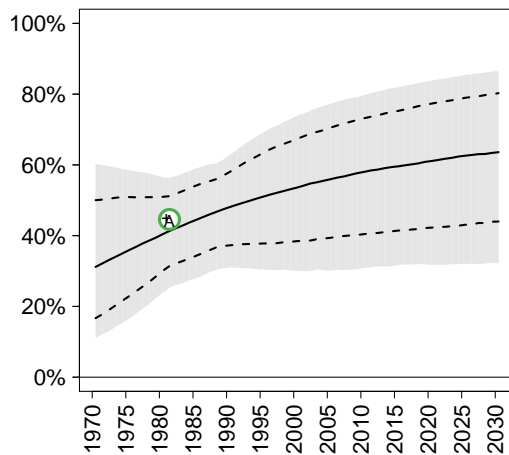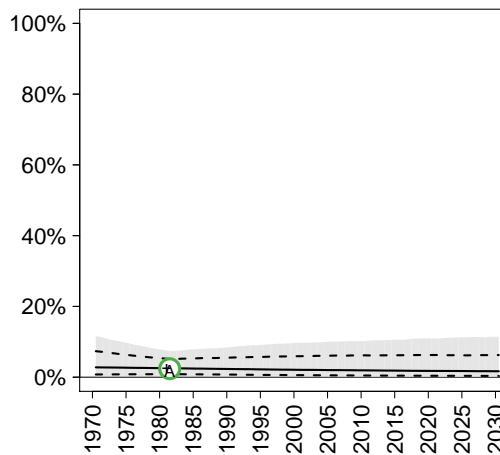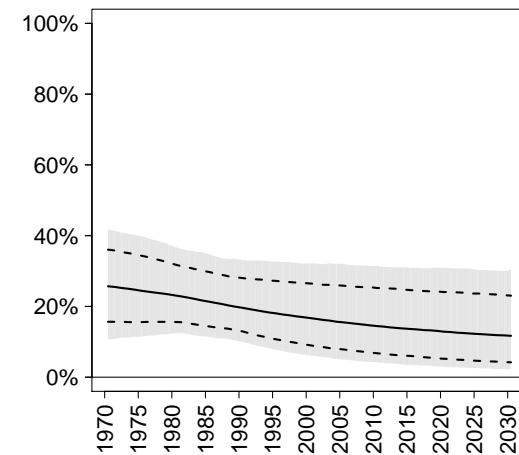

Total demand

Demand satisfied (any method)

Demand satisfied (modern methods)

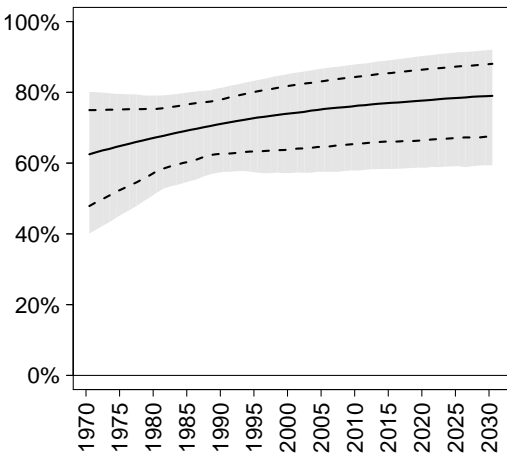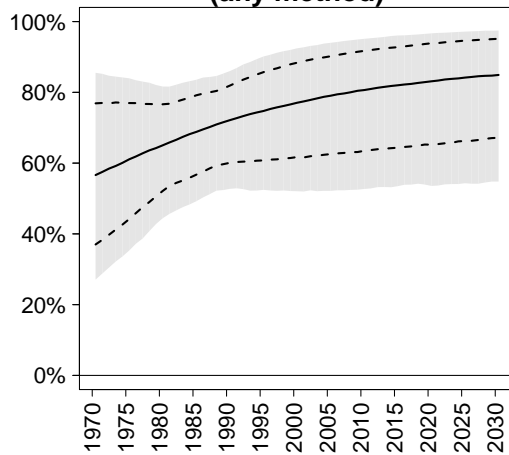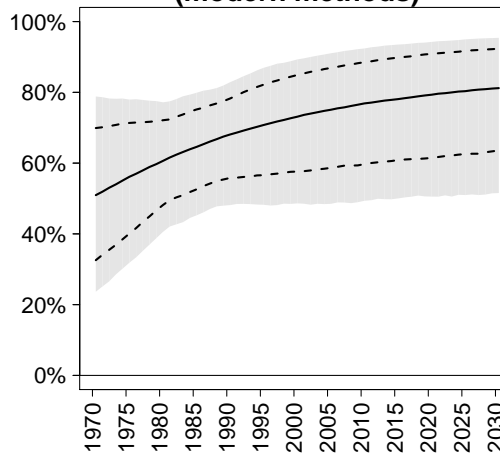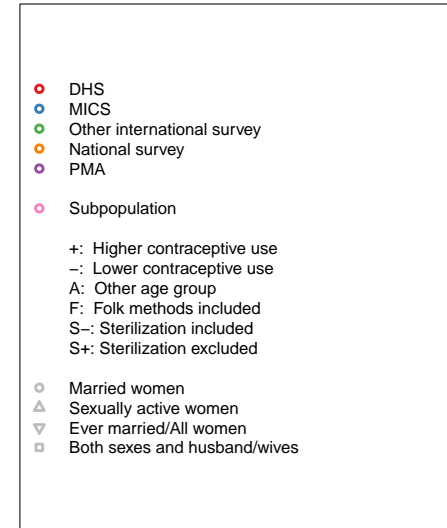

Argentina (South America) --- Married / In-Union

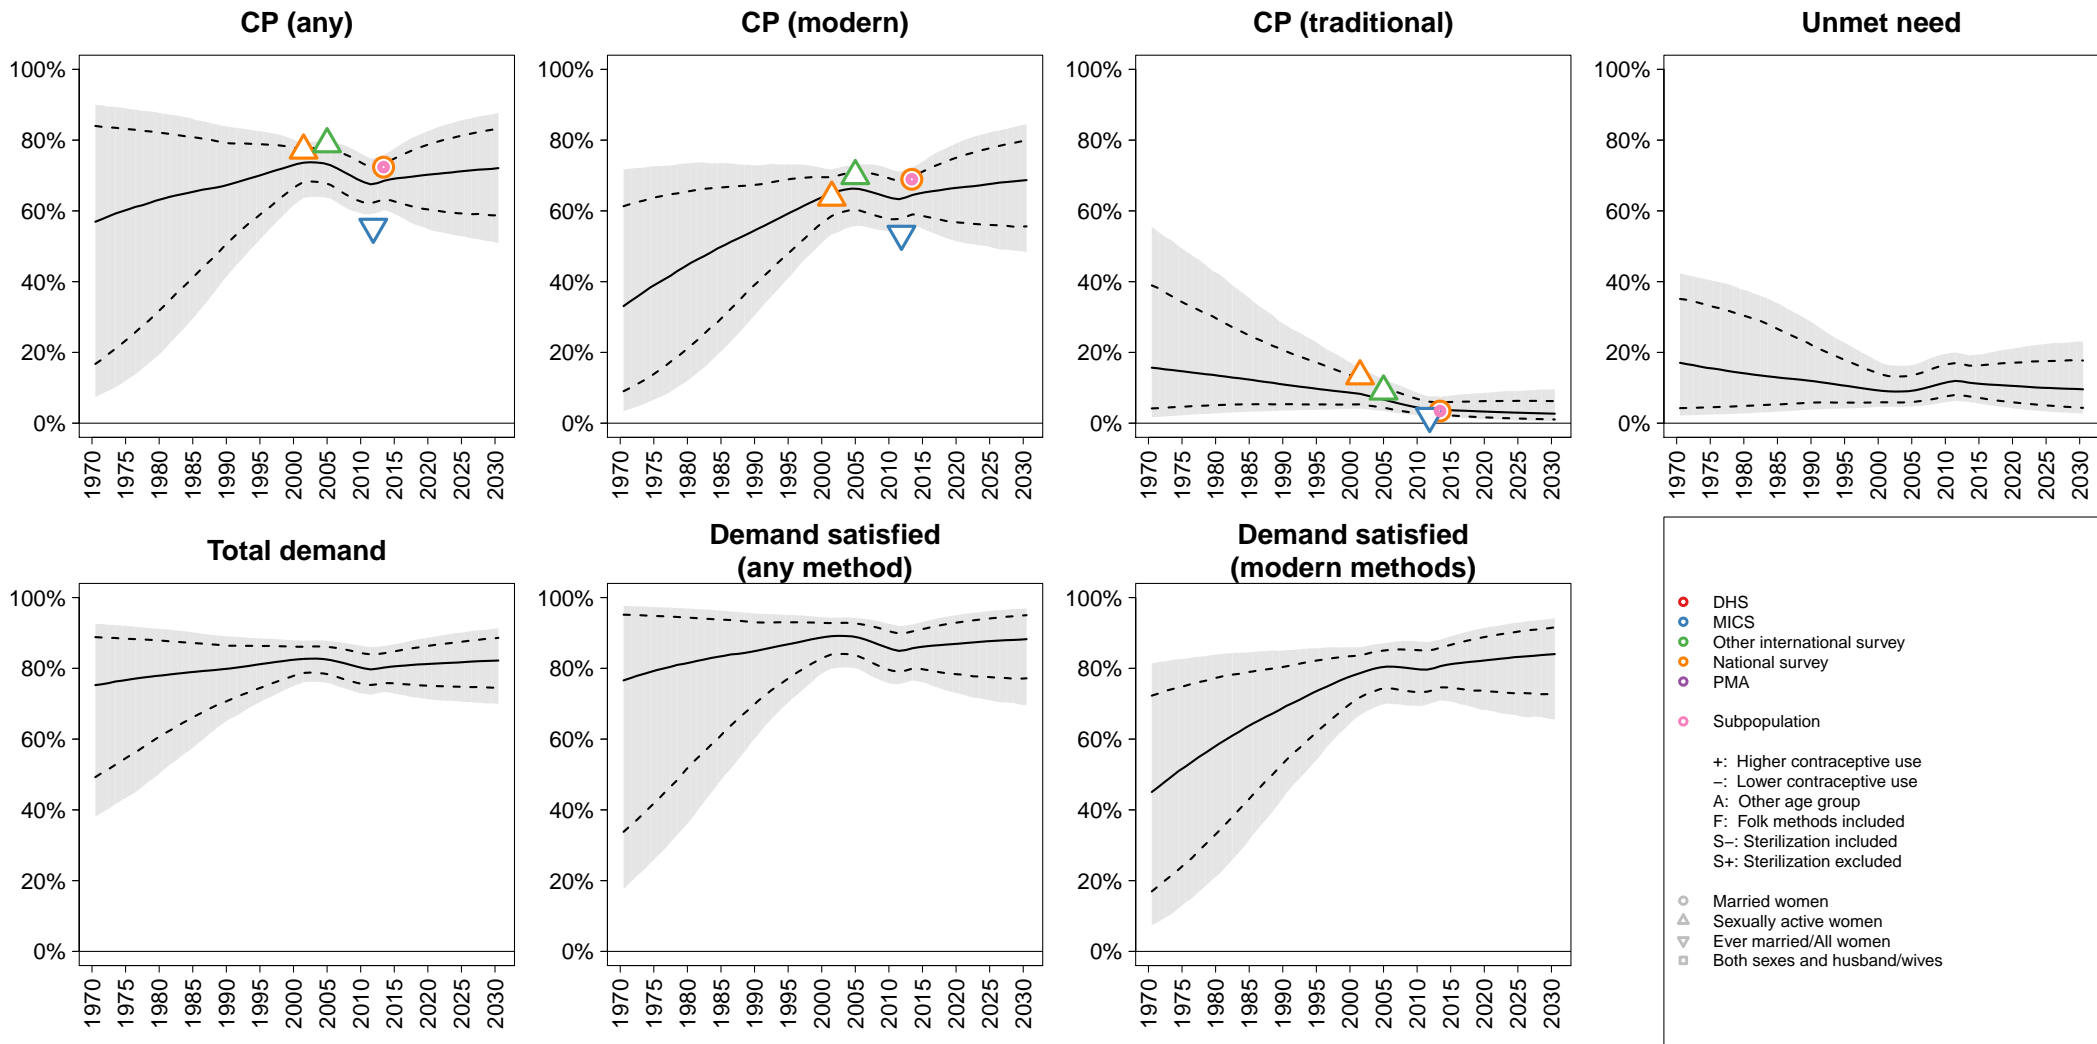

Armenia (Western Asia) --- Married / In-Union

CP (any)

CP (modern)

CP (traditional)

Unmet need

Total demand

Demand satisfied (any method)

Demand satisfied (modern methods)

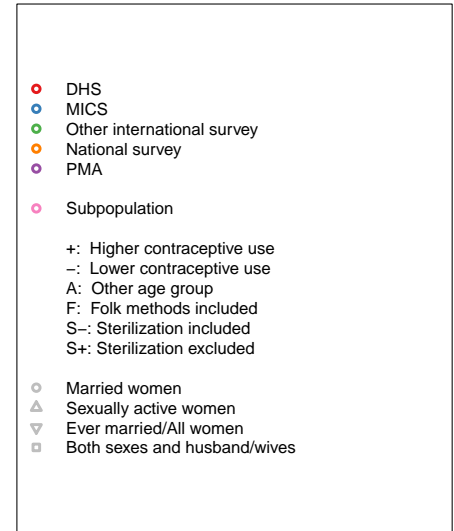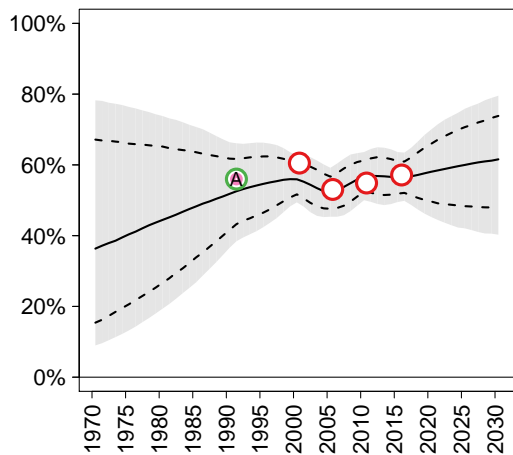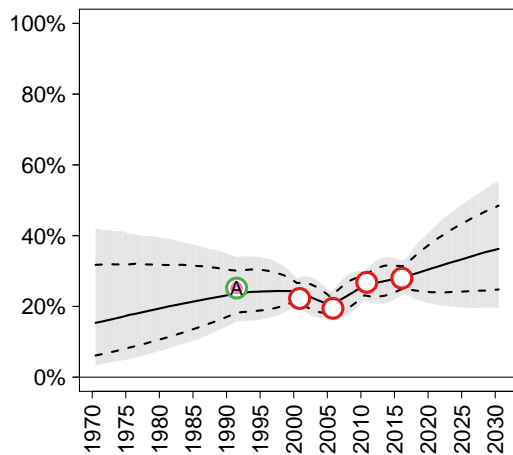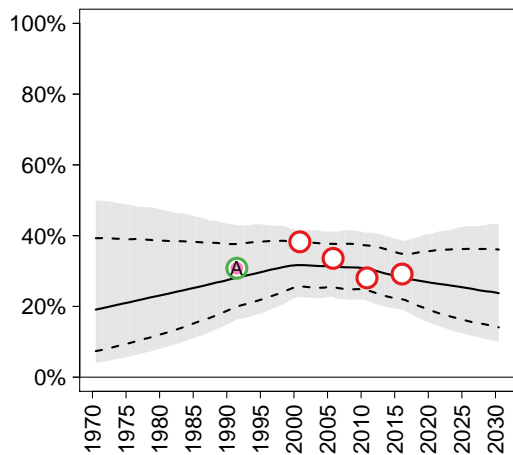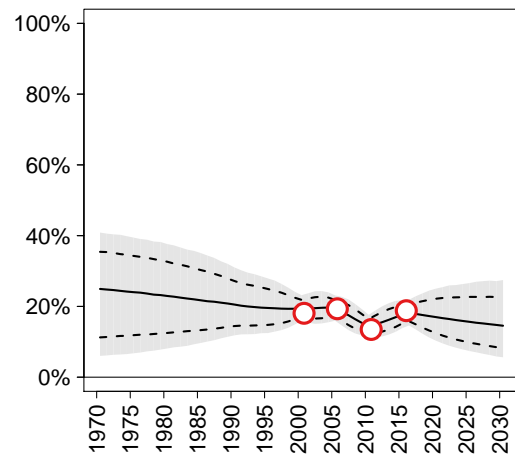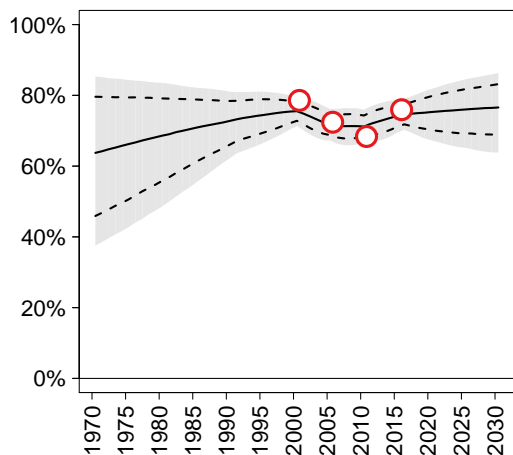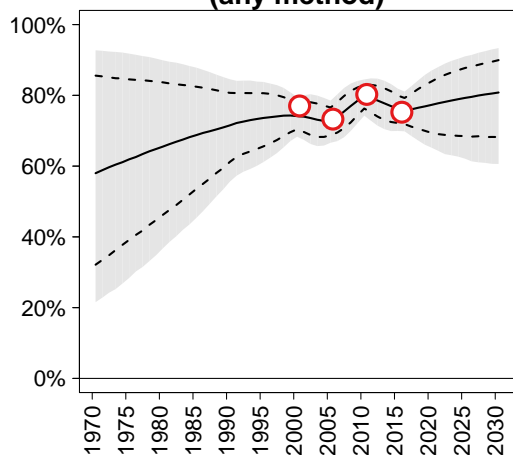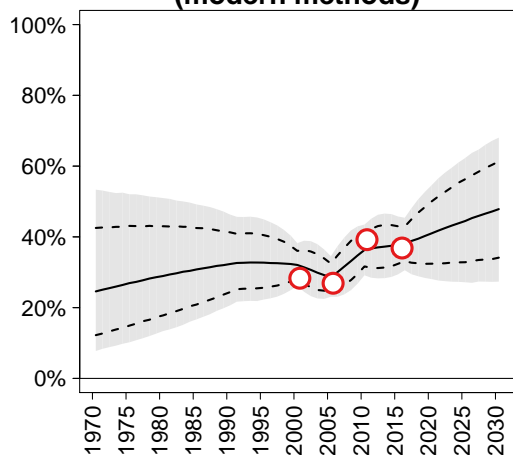

Australia (Australia and New Zealand) --- Married / In-Union

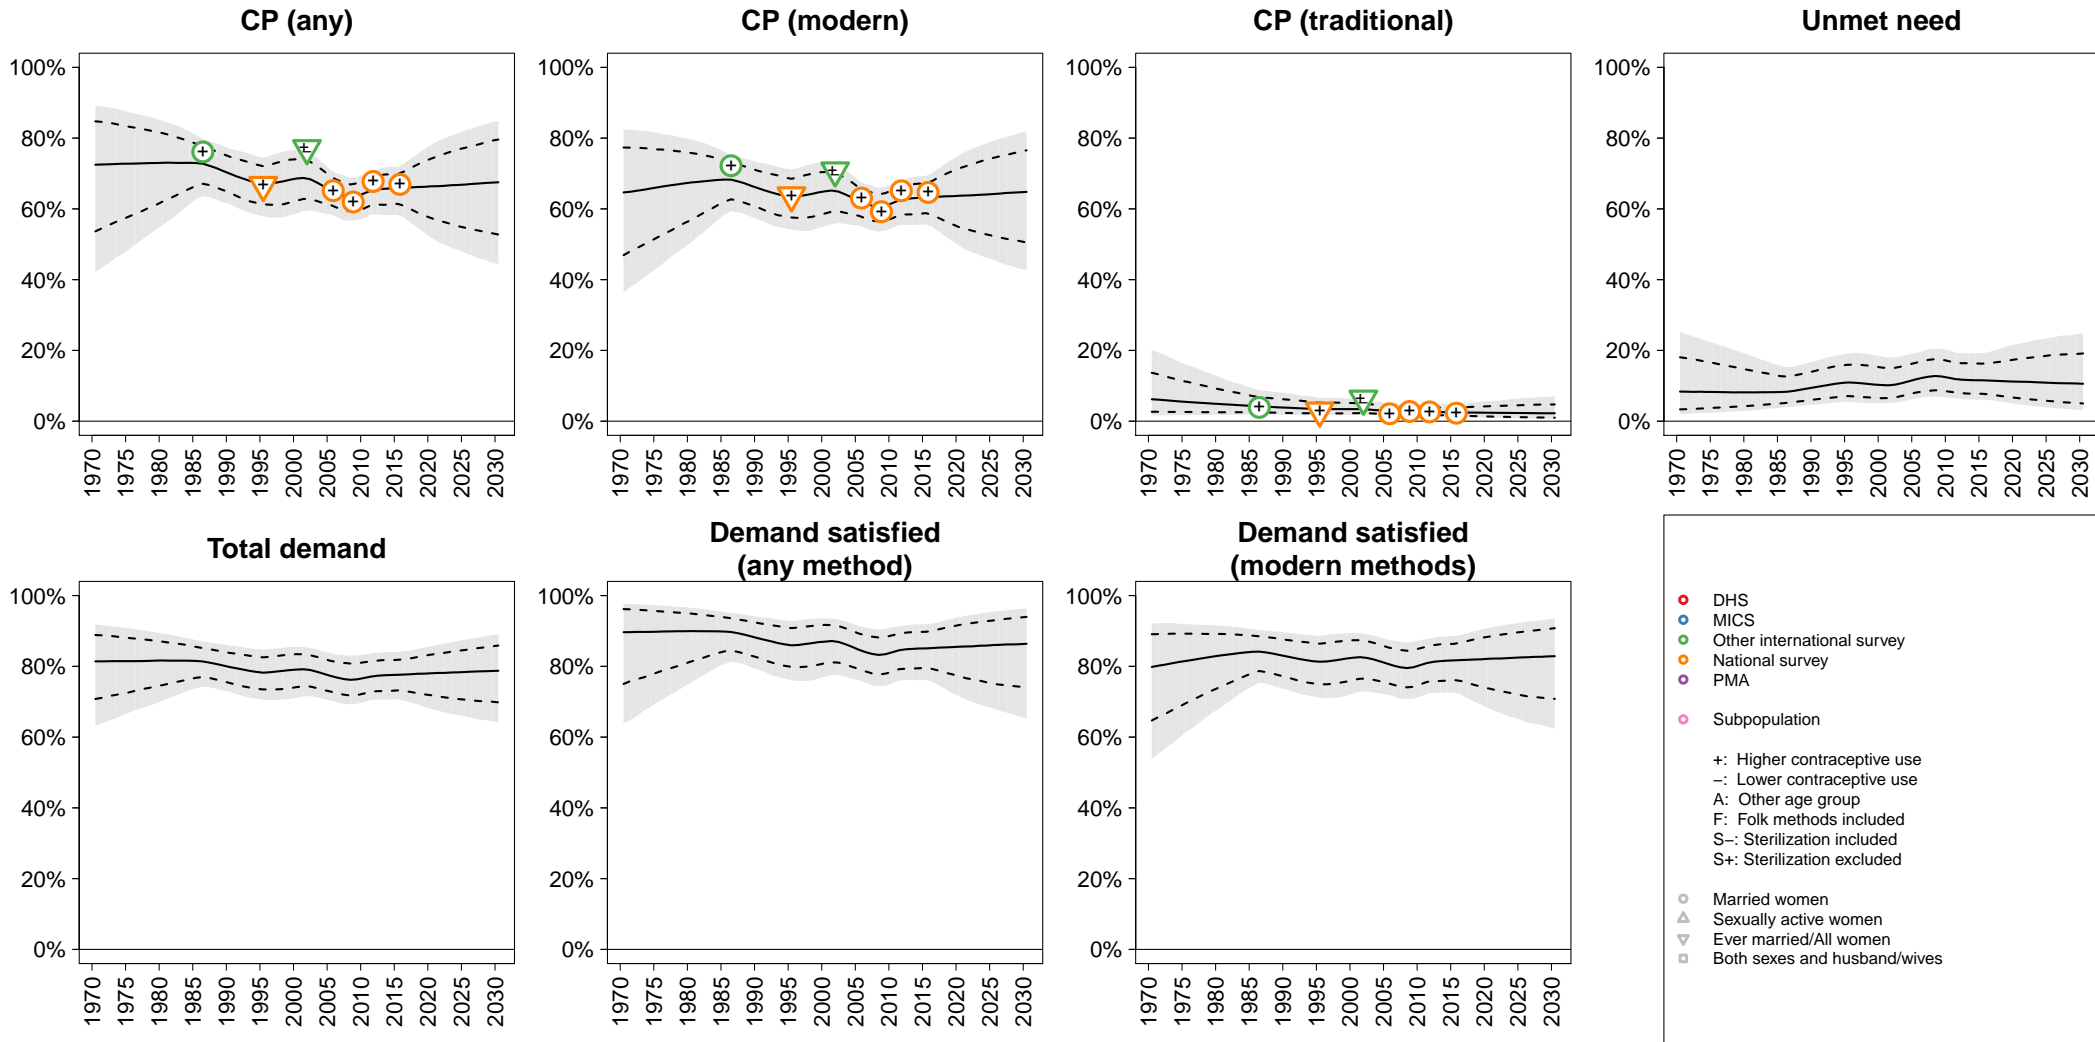

Austria (Western Europe) --- Married / In-Union

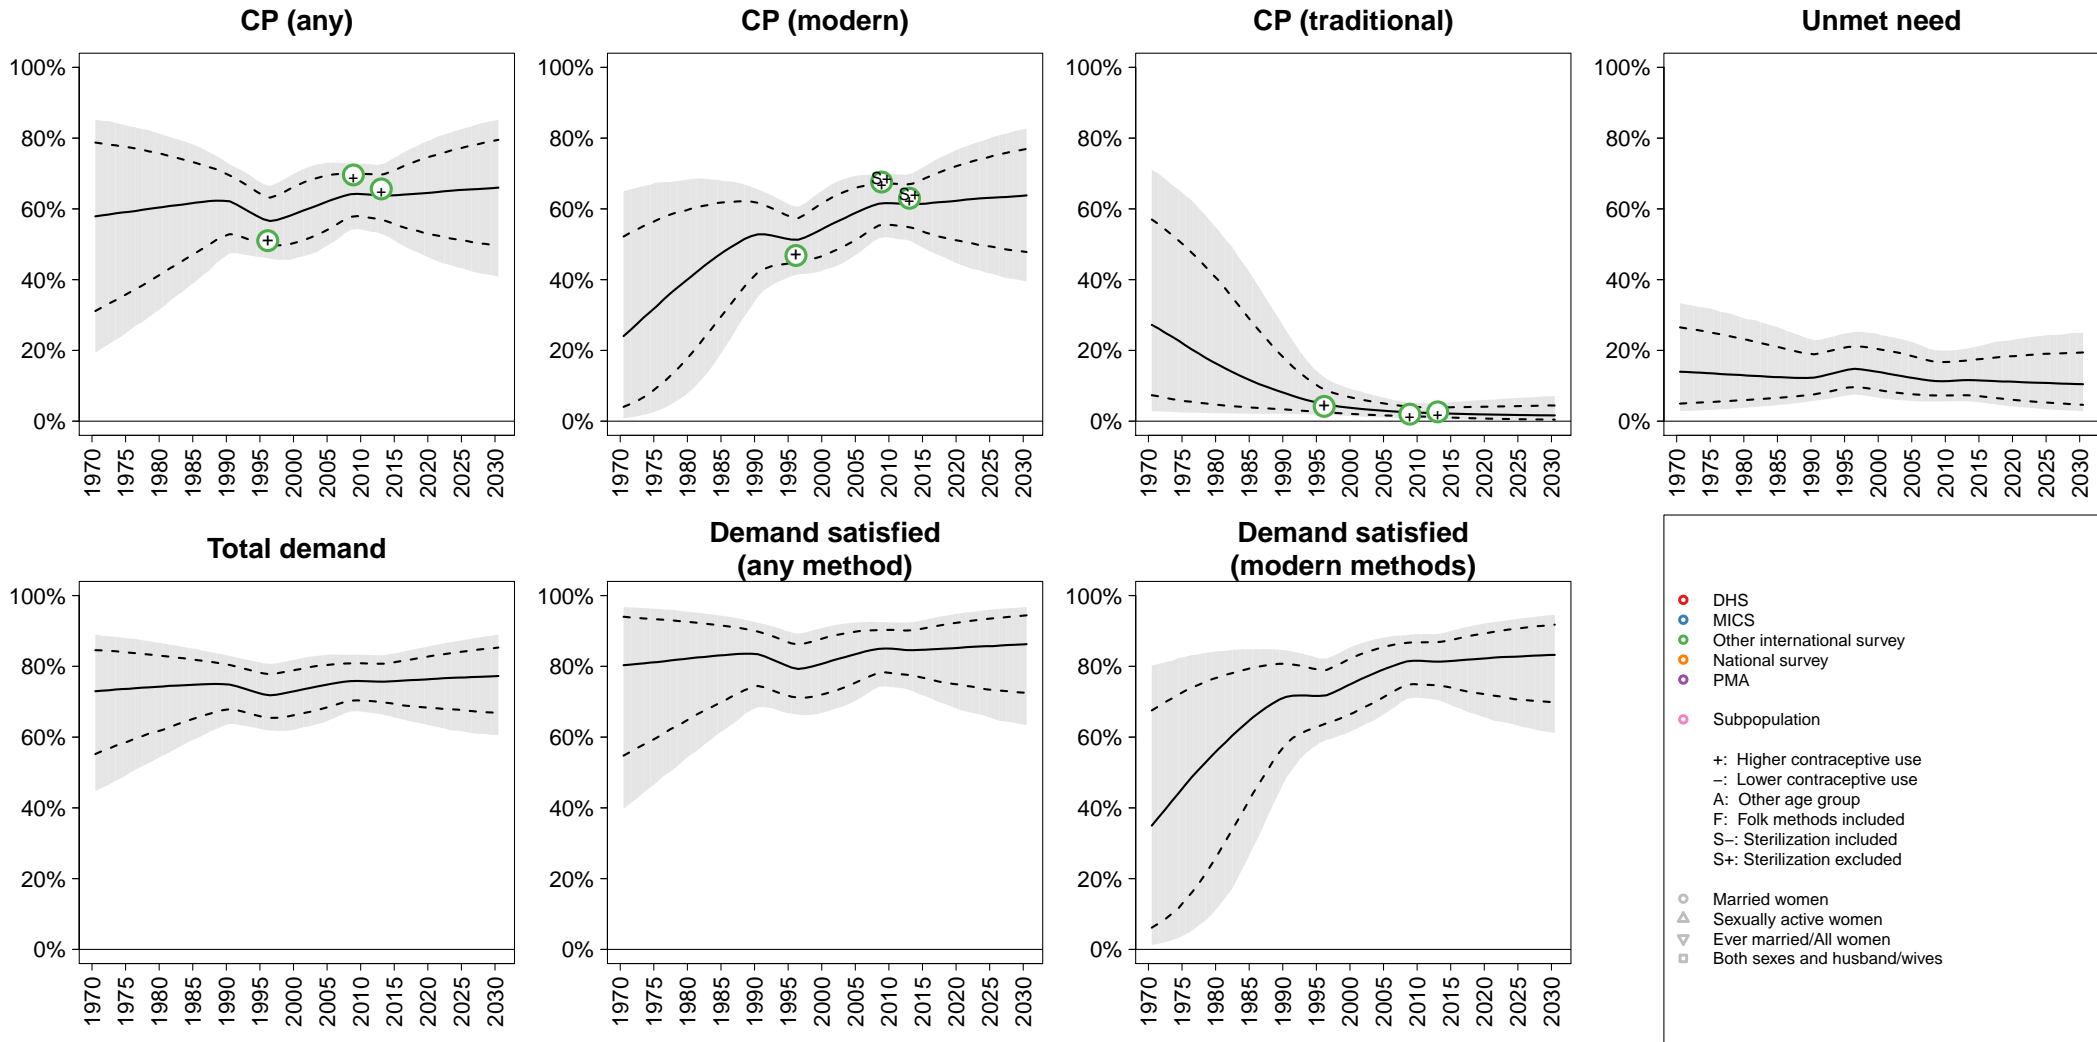



Azerbaijan (Western Asia) — Married / In-Union

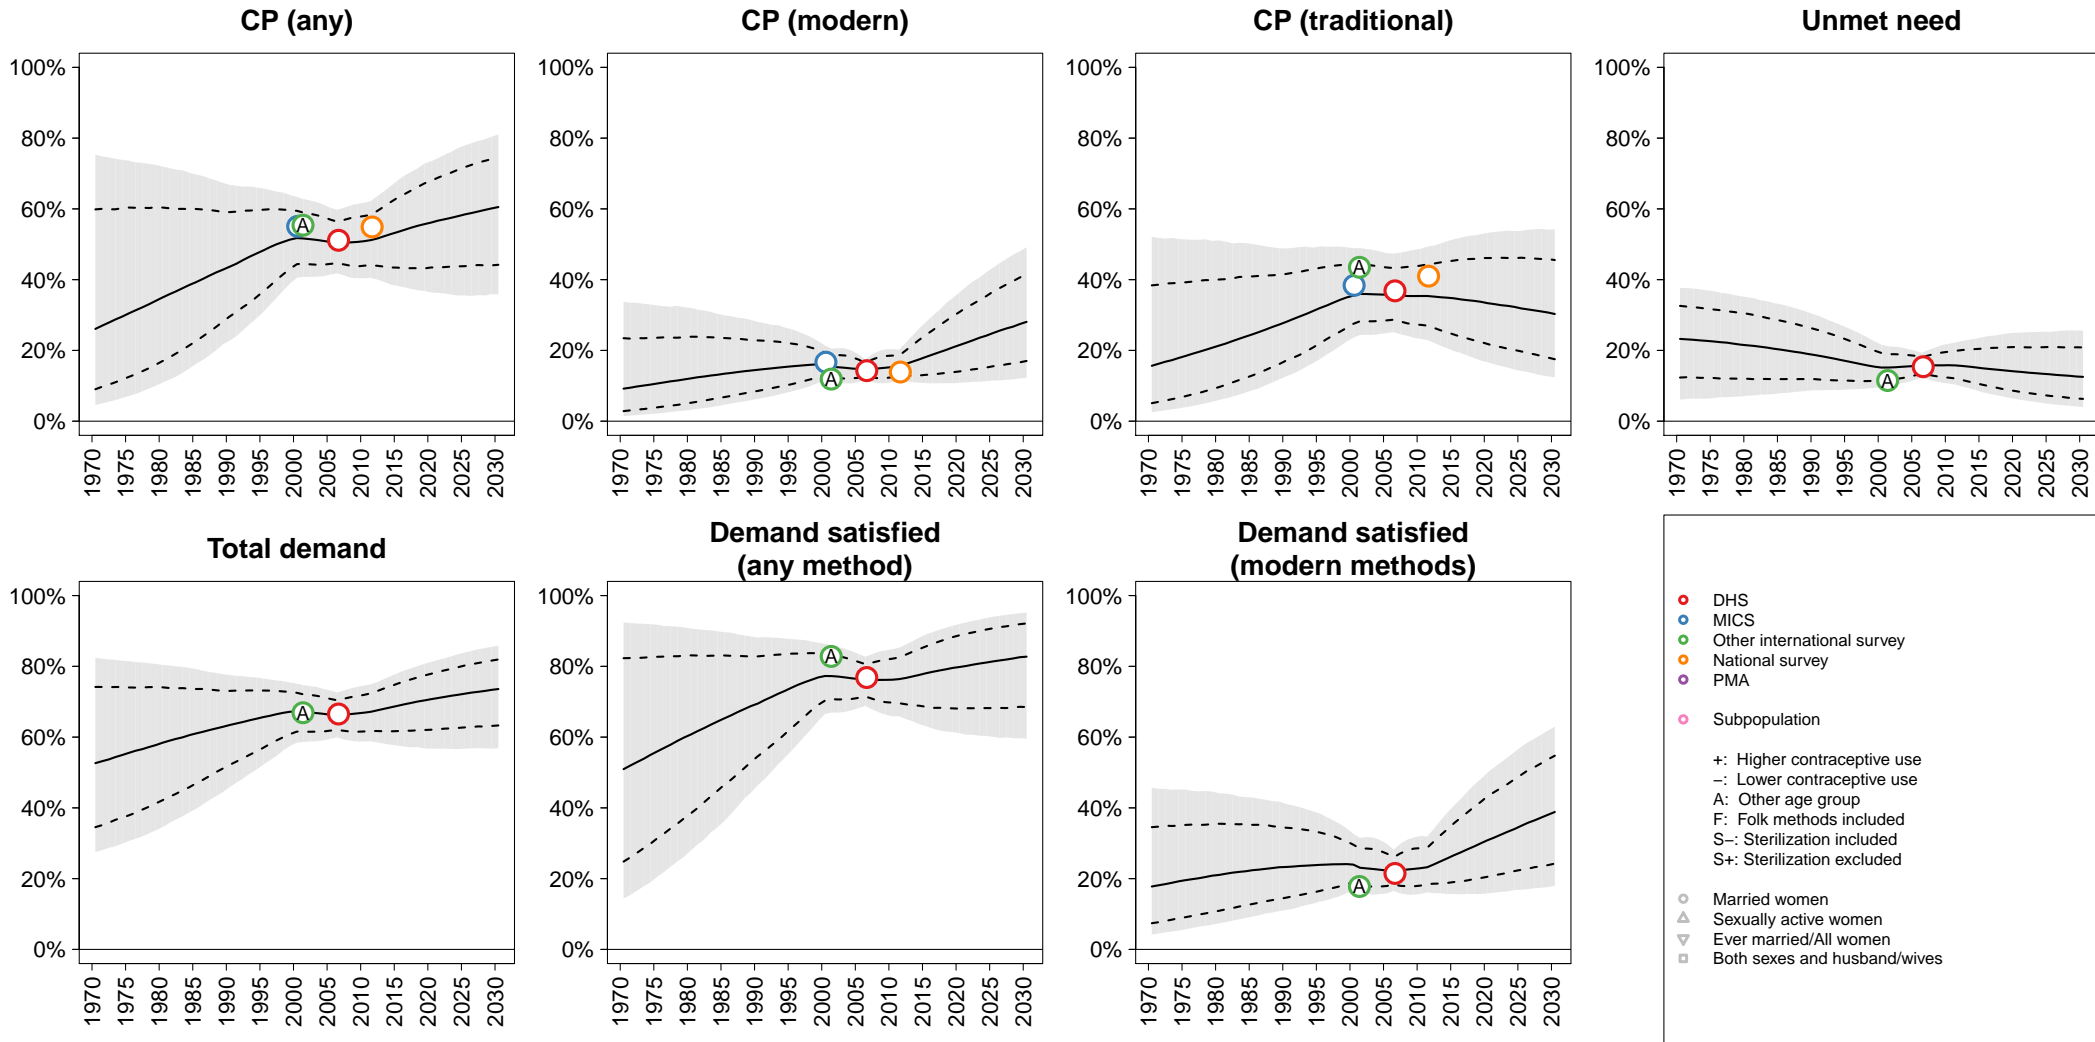

Bahamas (Caribbean) --- Married / In-Union

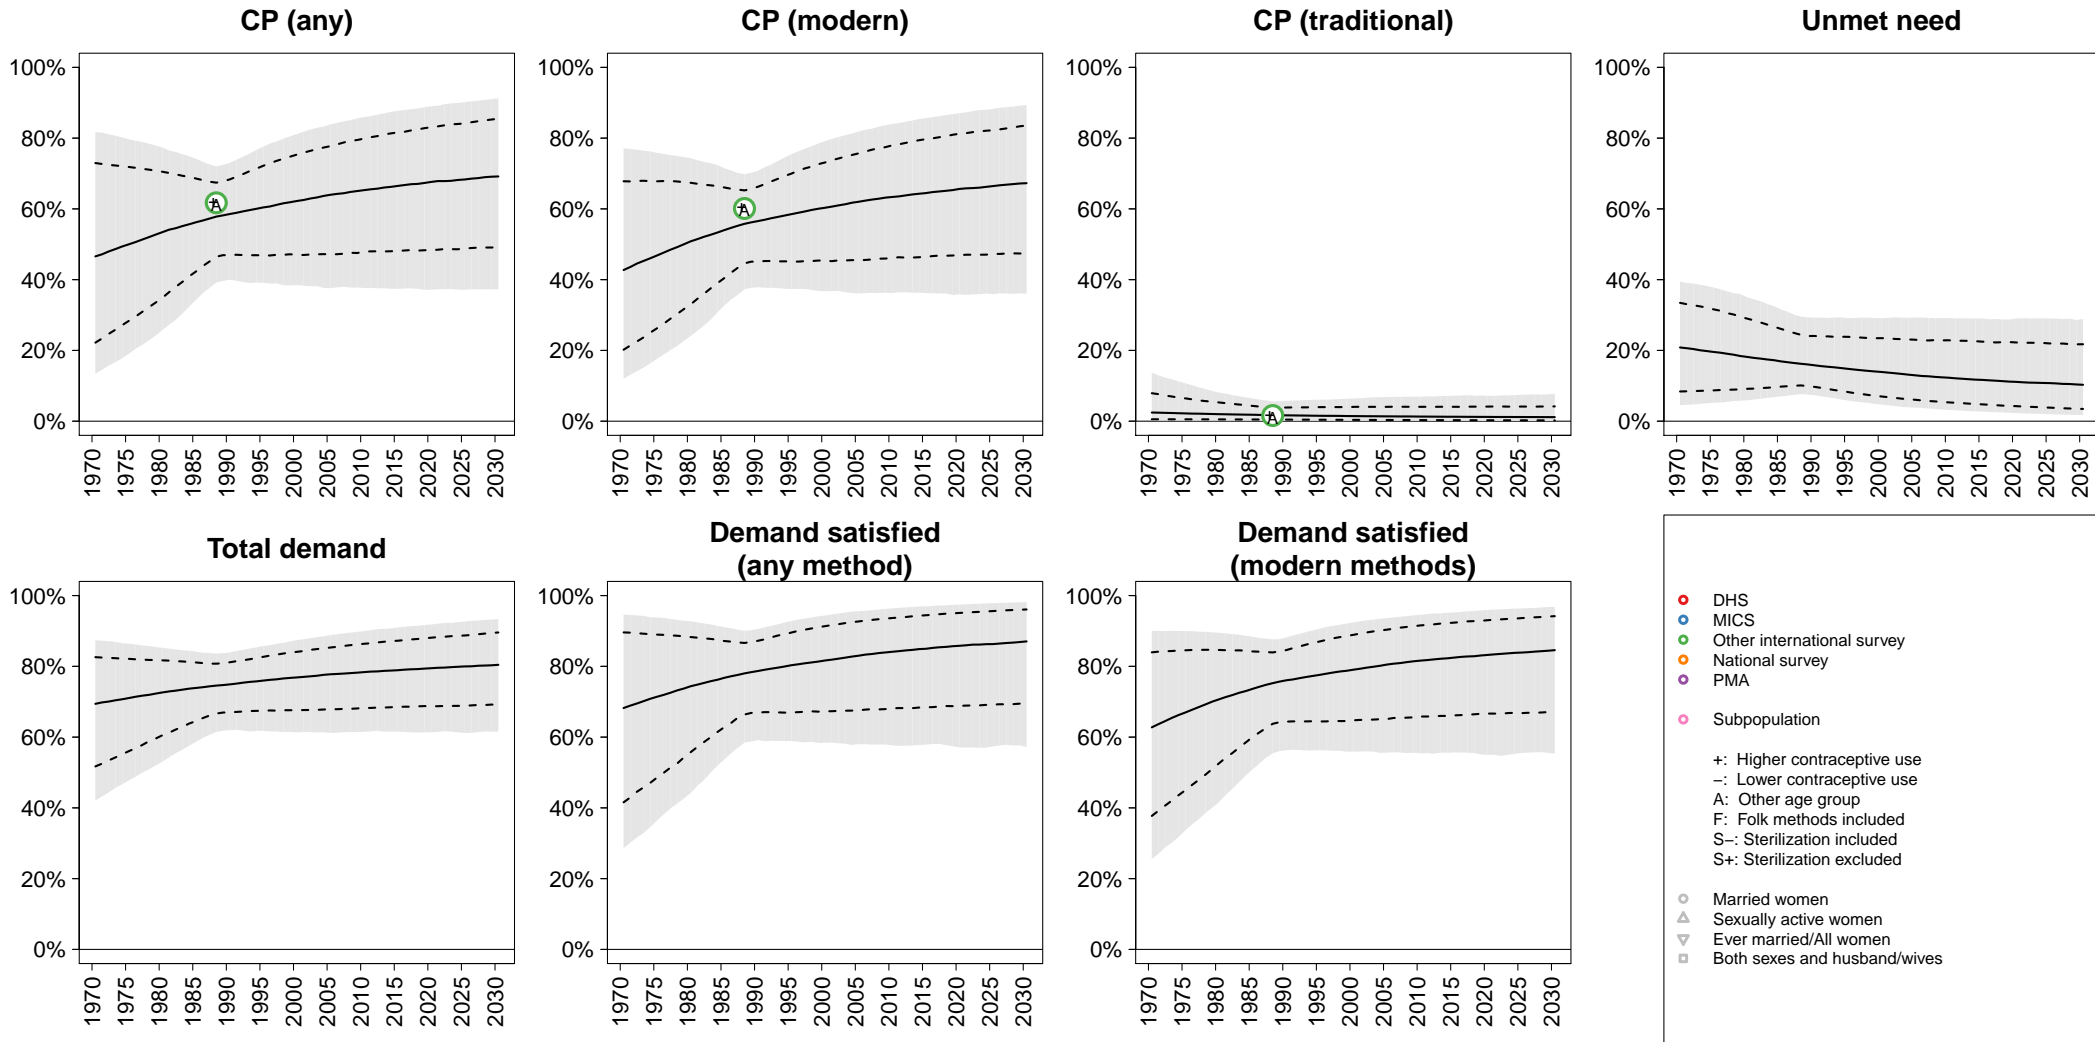

Bahrain (Western Asia) --- Married / In-Union

CP (any)

CP (modern)

CP (traditional)

Unmet need

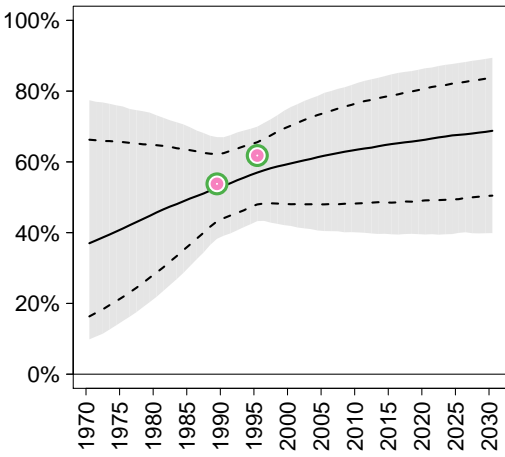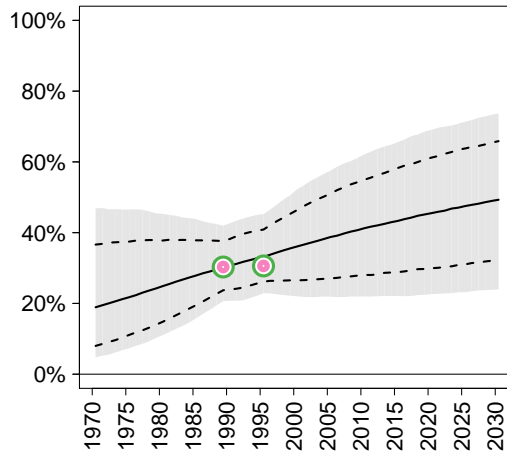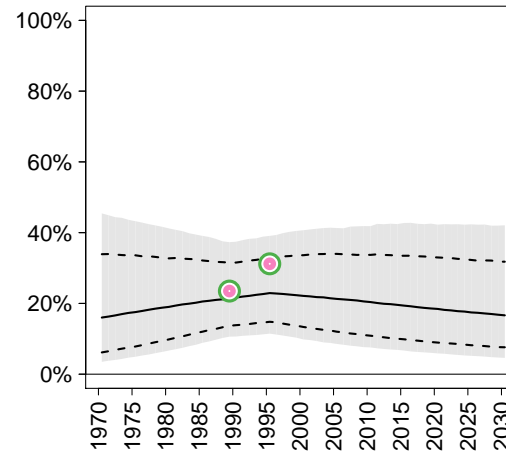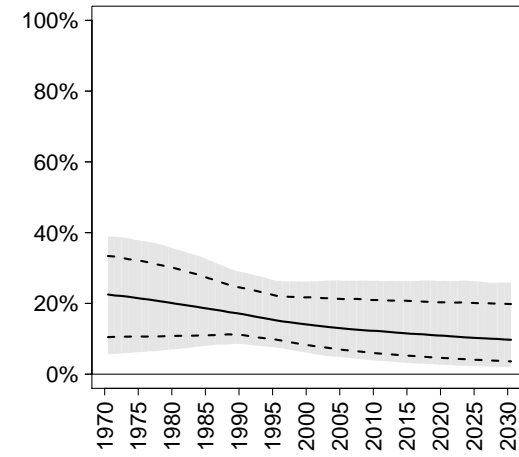

Total demand

Demand satisfied (any method)

Demand satisfied (modern methods)

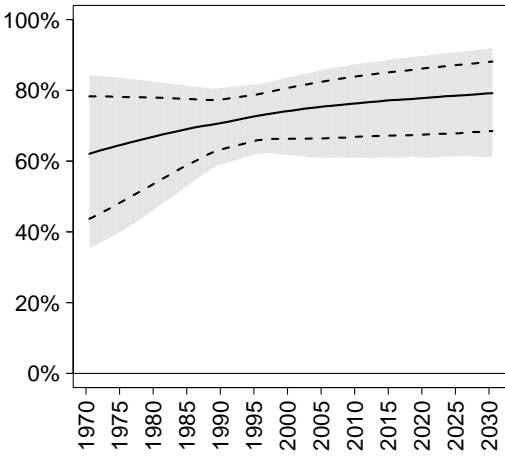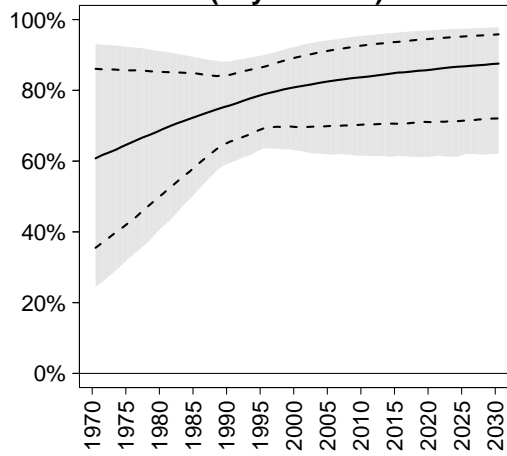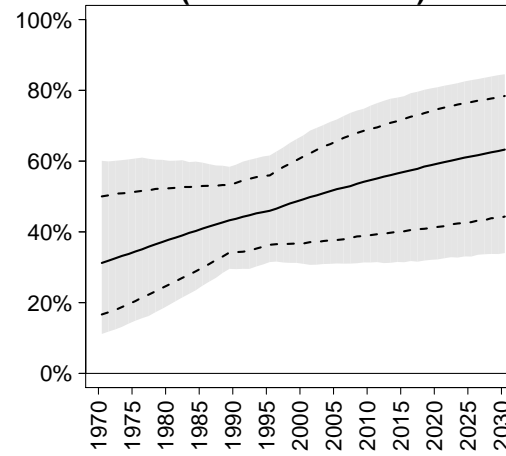

Bangladesh (Southern Asia) --- Married / In-Union

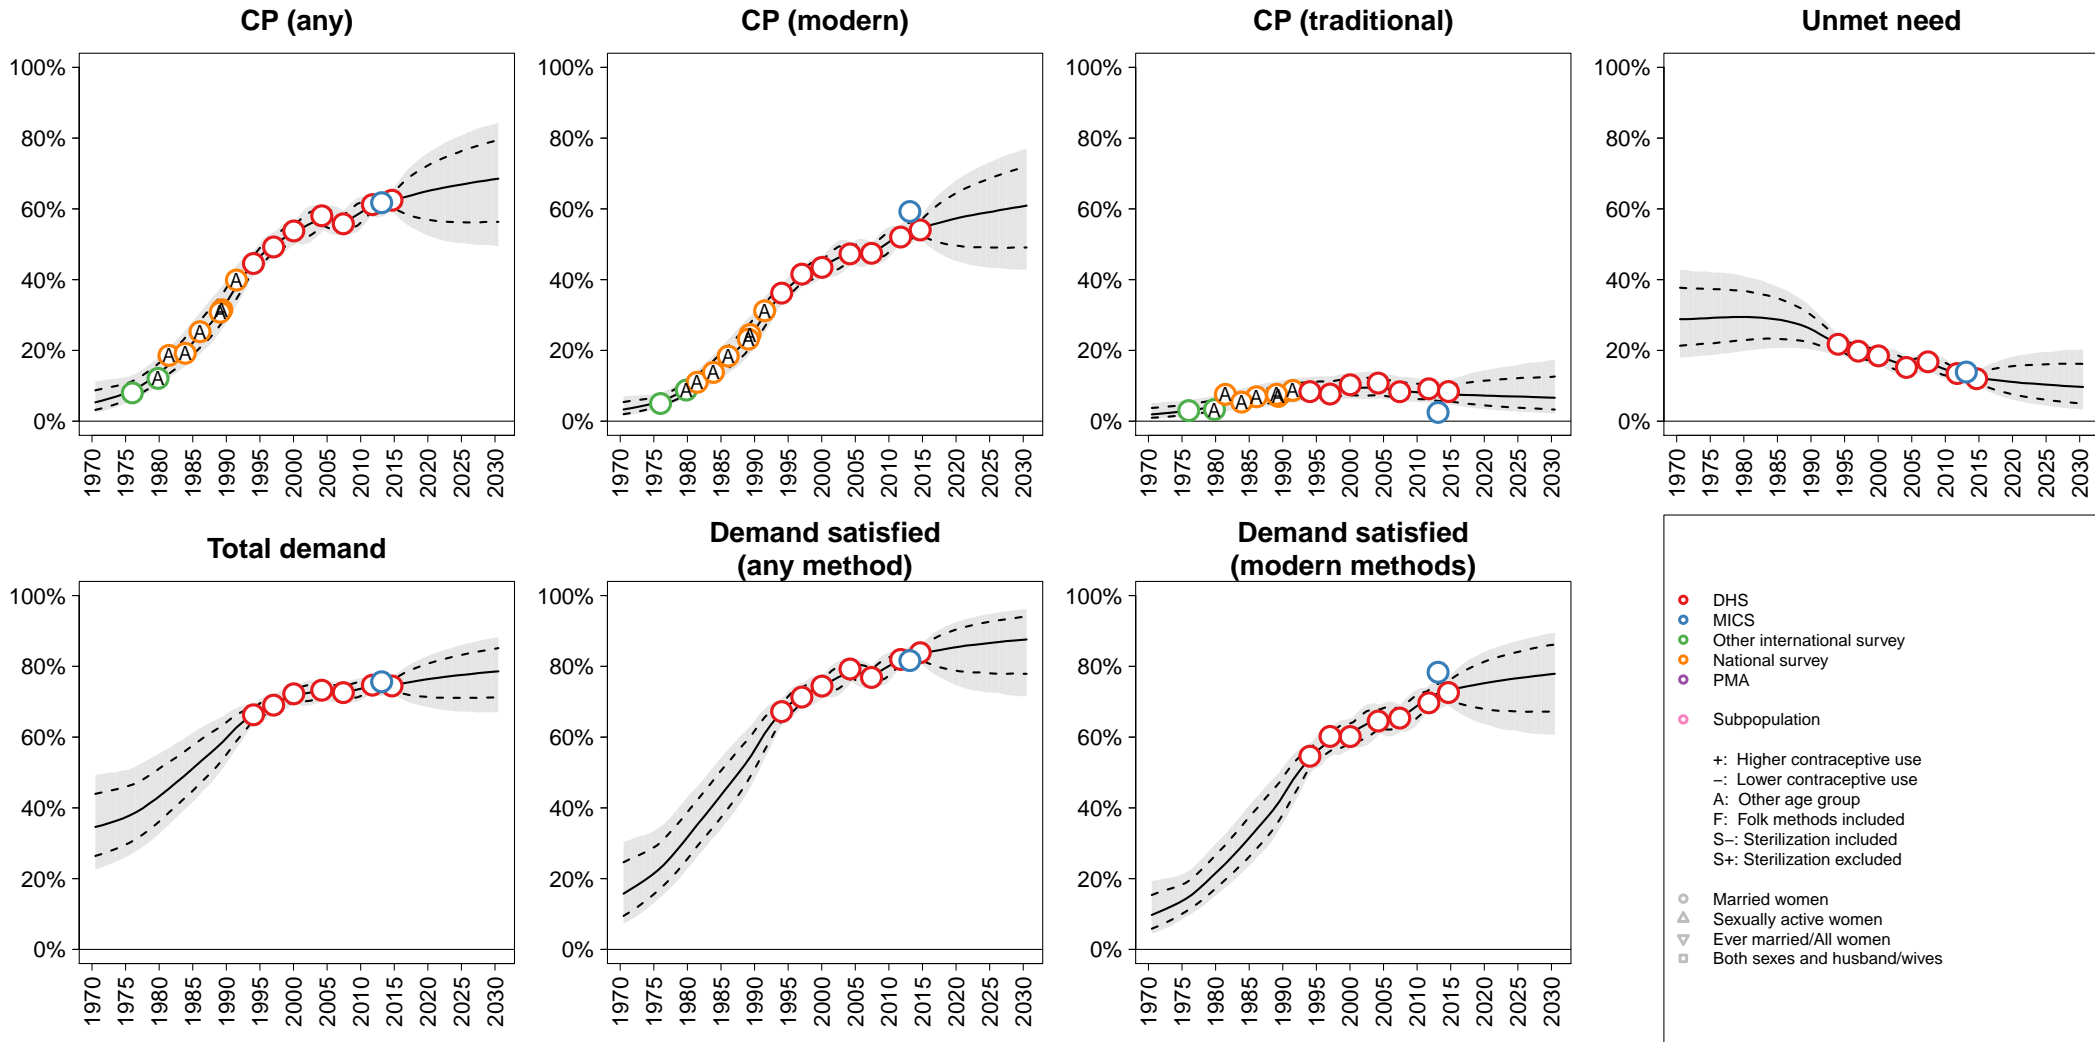

Barbados (Caribbean) --- Married / In-Union

CP (any)

CP (modern)

CP (traditional)

Unmet need

Total demand

Demand satisfied (any method)

Demand satisfied (modern methods)

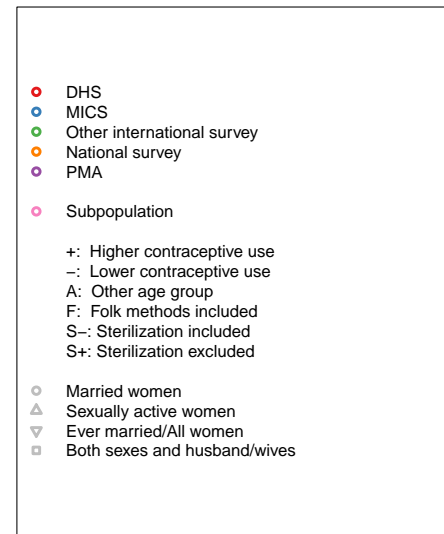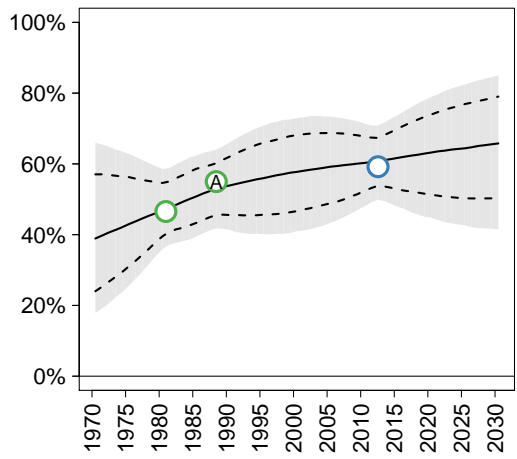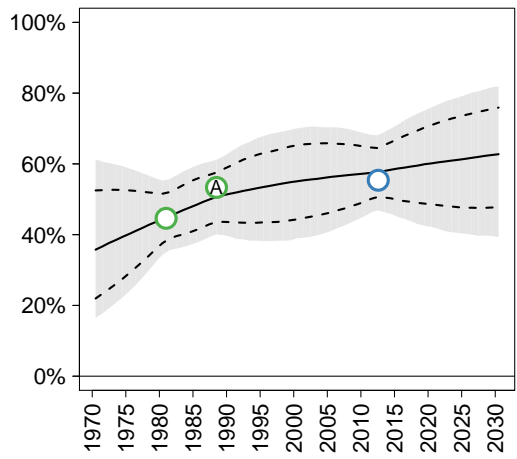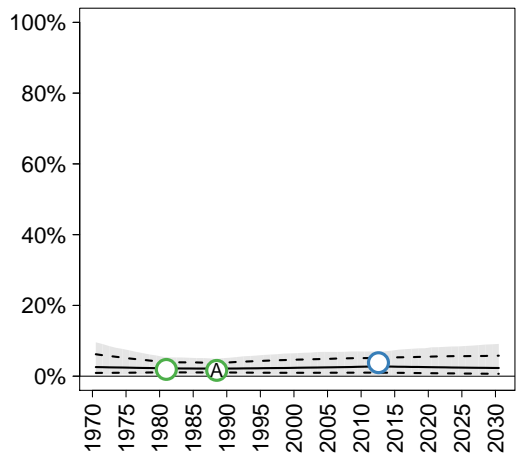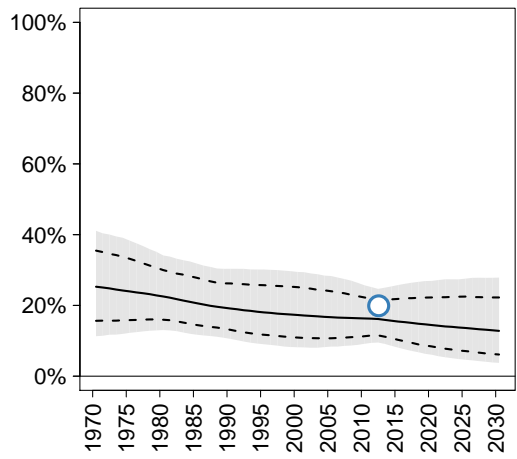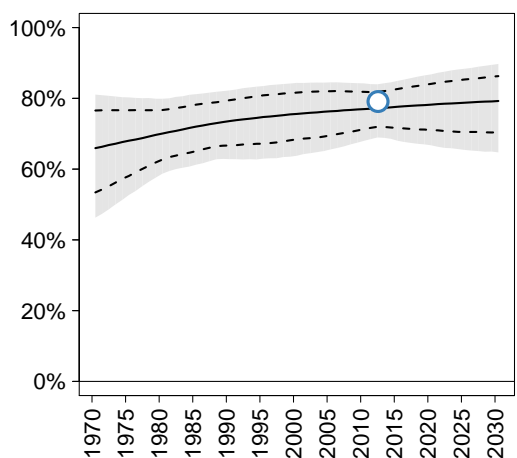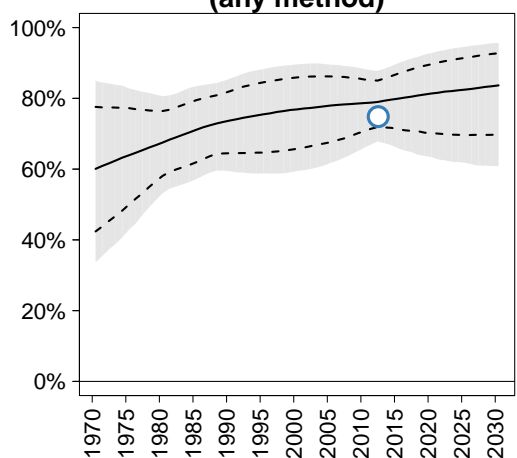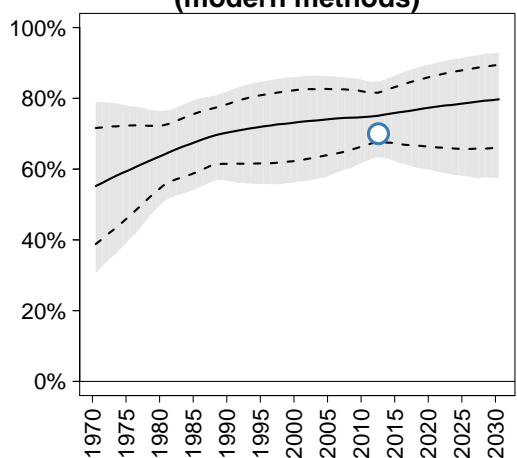

Belarus (Eastern Europe) --- Married / In-Union

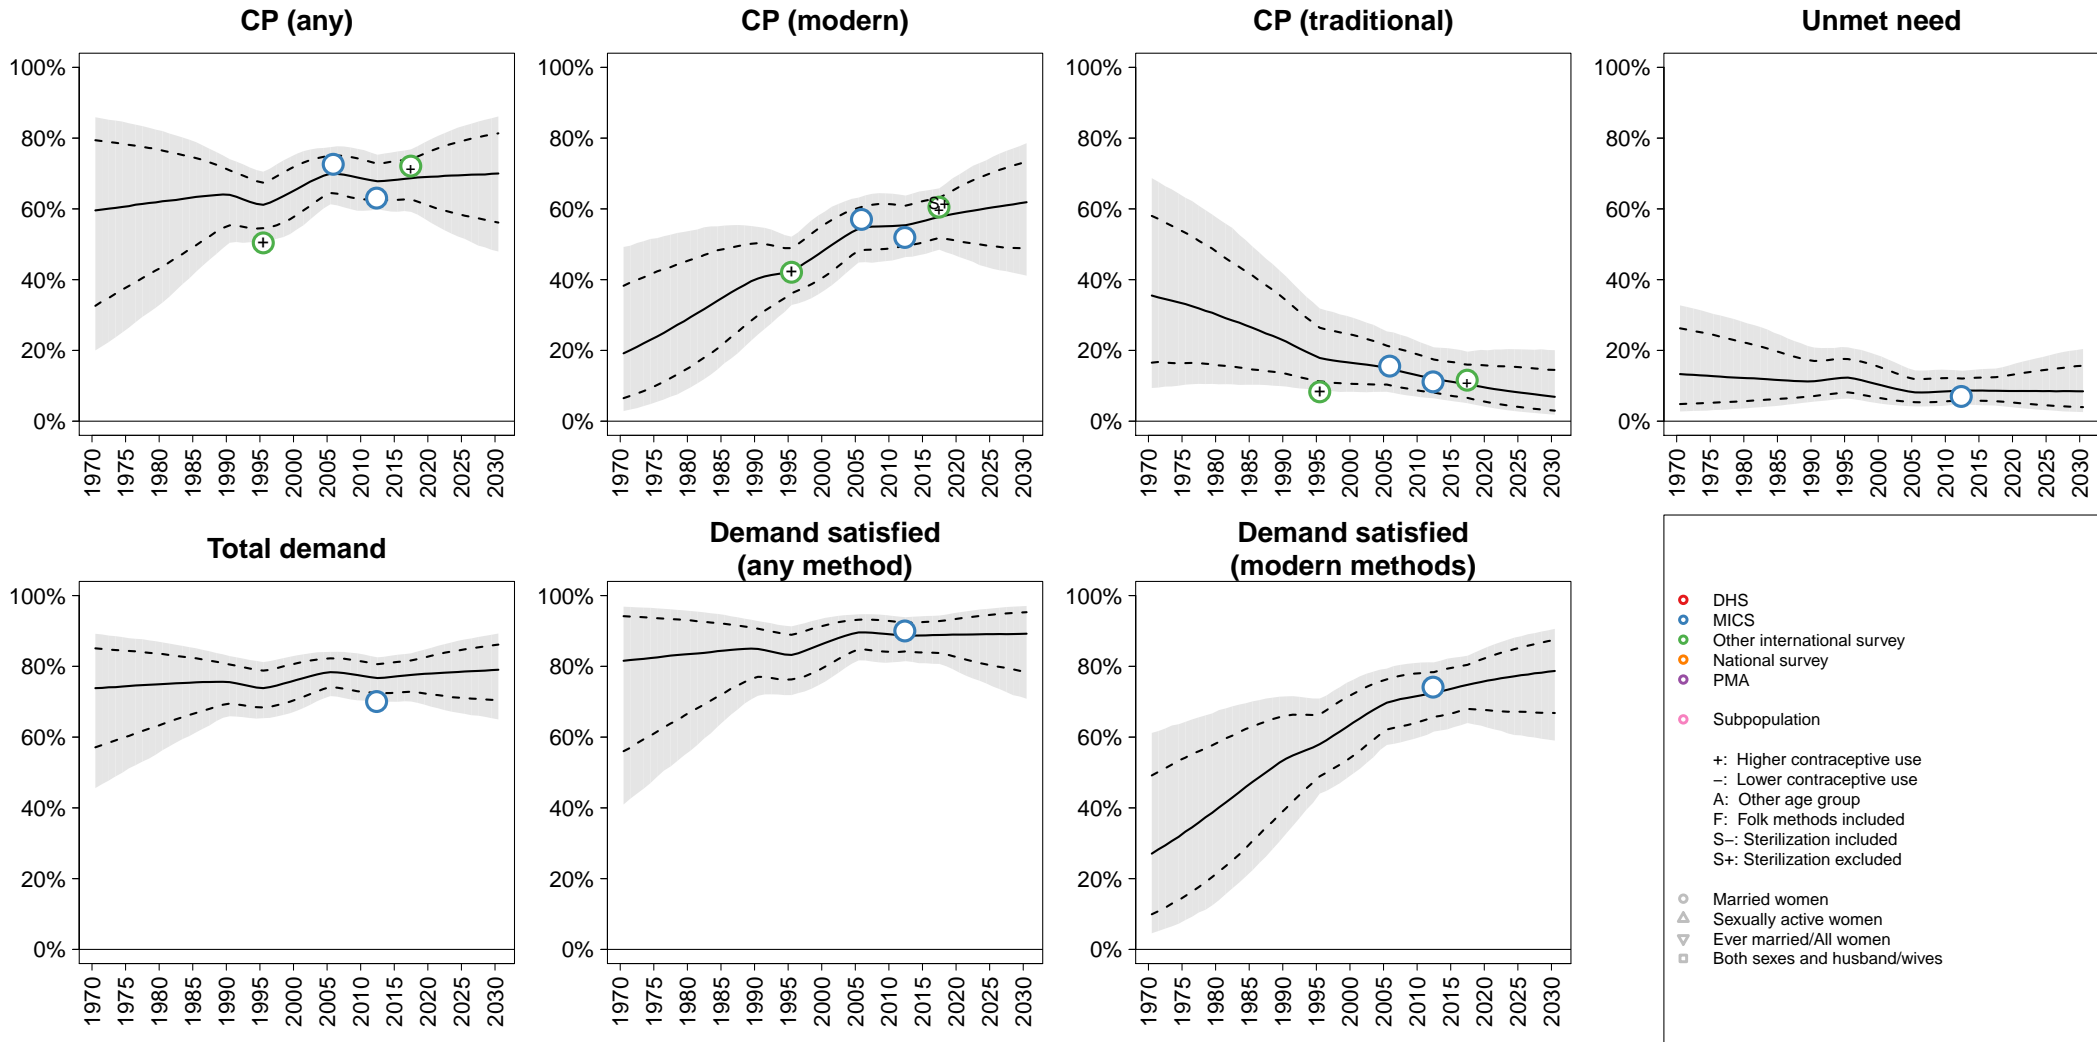

Belgium (Western Europe) --- Married / In-Union

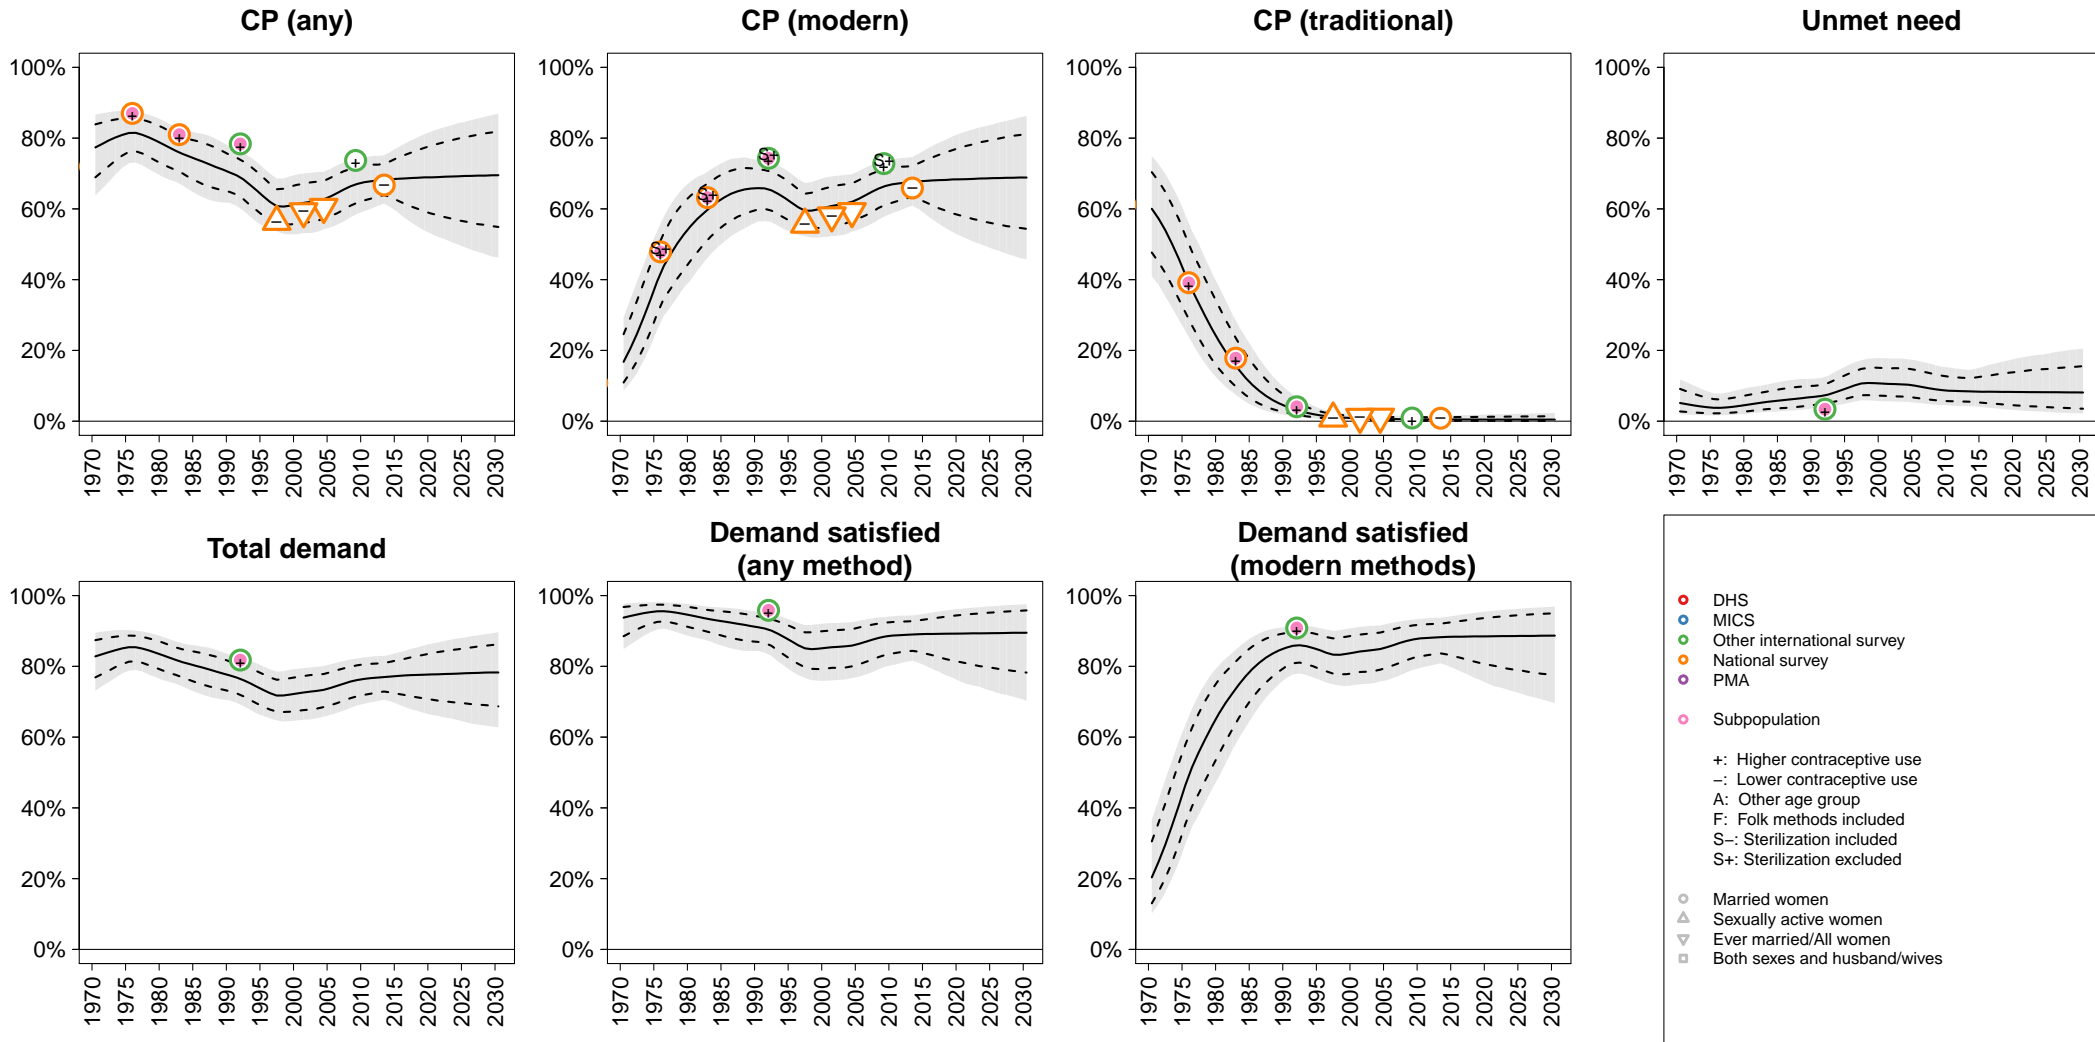

Belize (Central America) --- Married / In-Union

CP (any)

CP (modern)

CP (traditional)

Unmet need

Total demand

Demand satisfied (any method)

Demand satisfied (modern methods)

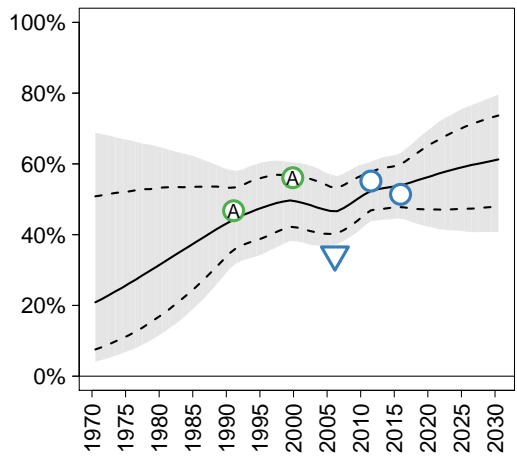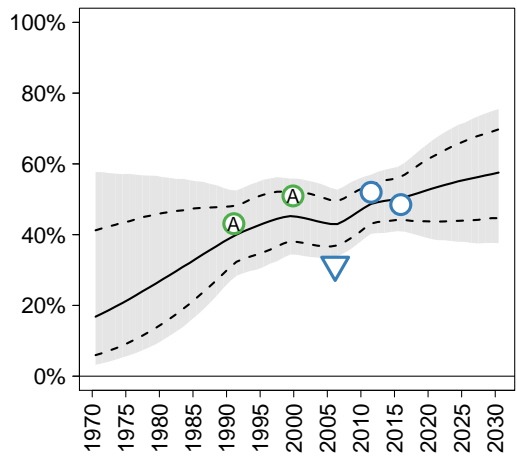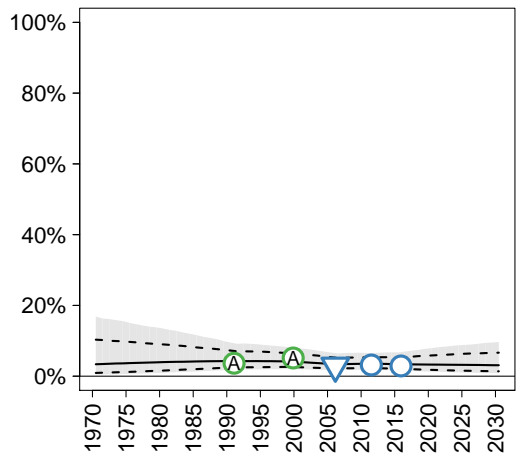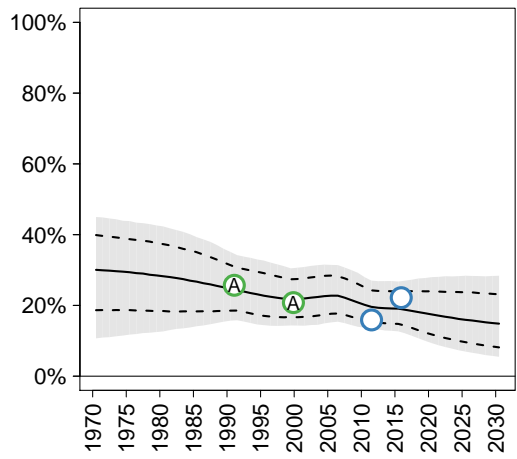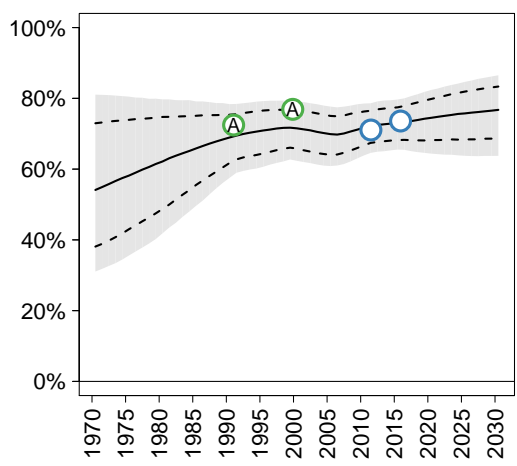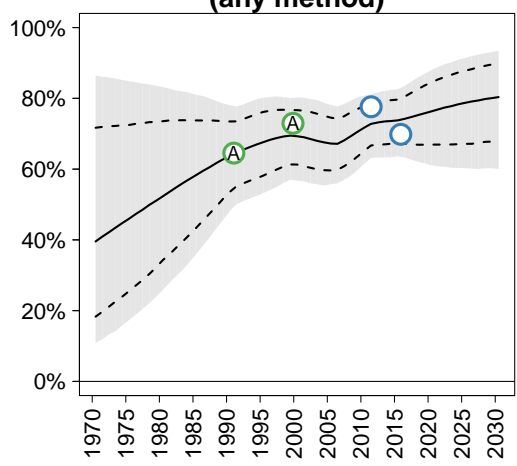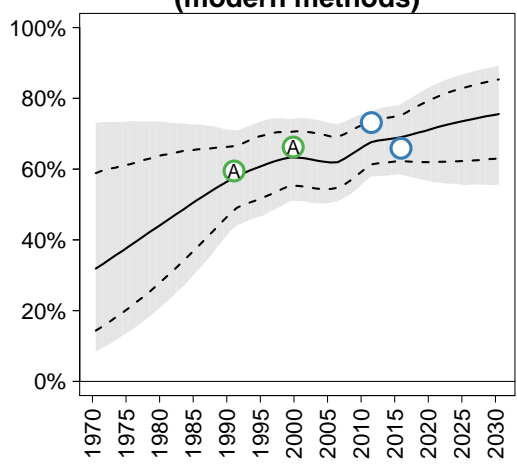



Benin (Western Africa) --- Married / In-Union

CP (any)

CP (modern)

CP (traditional)

Unmet need

Total demand

Demand satisfied (any method)

Demand satisfied (modern methods)



Bhutan (Southern Asia) --- Married / In-Union

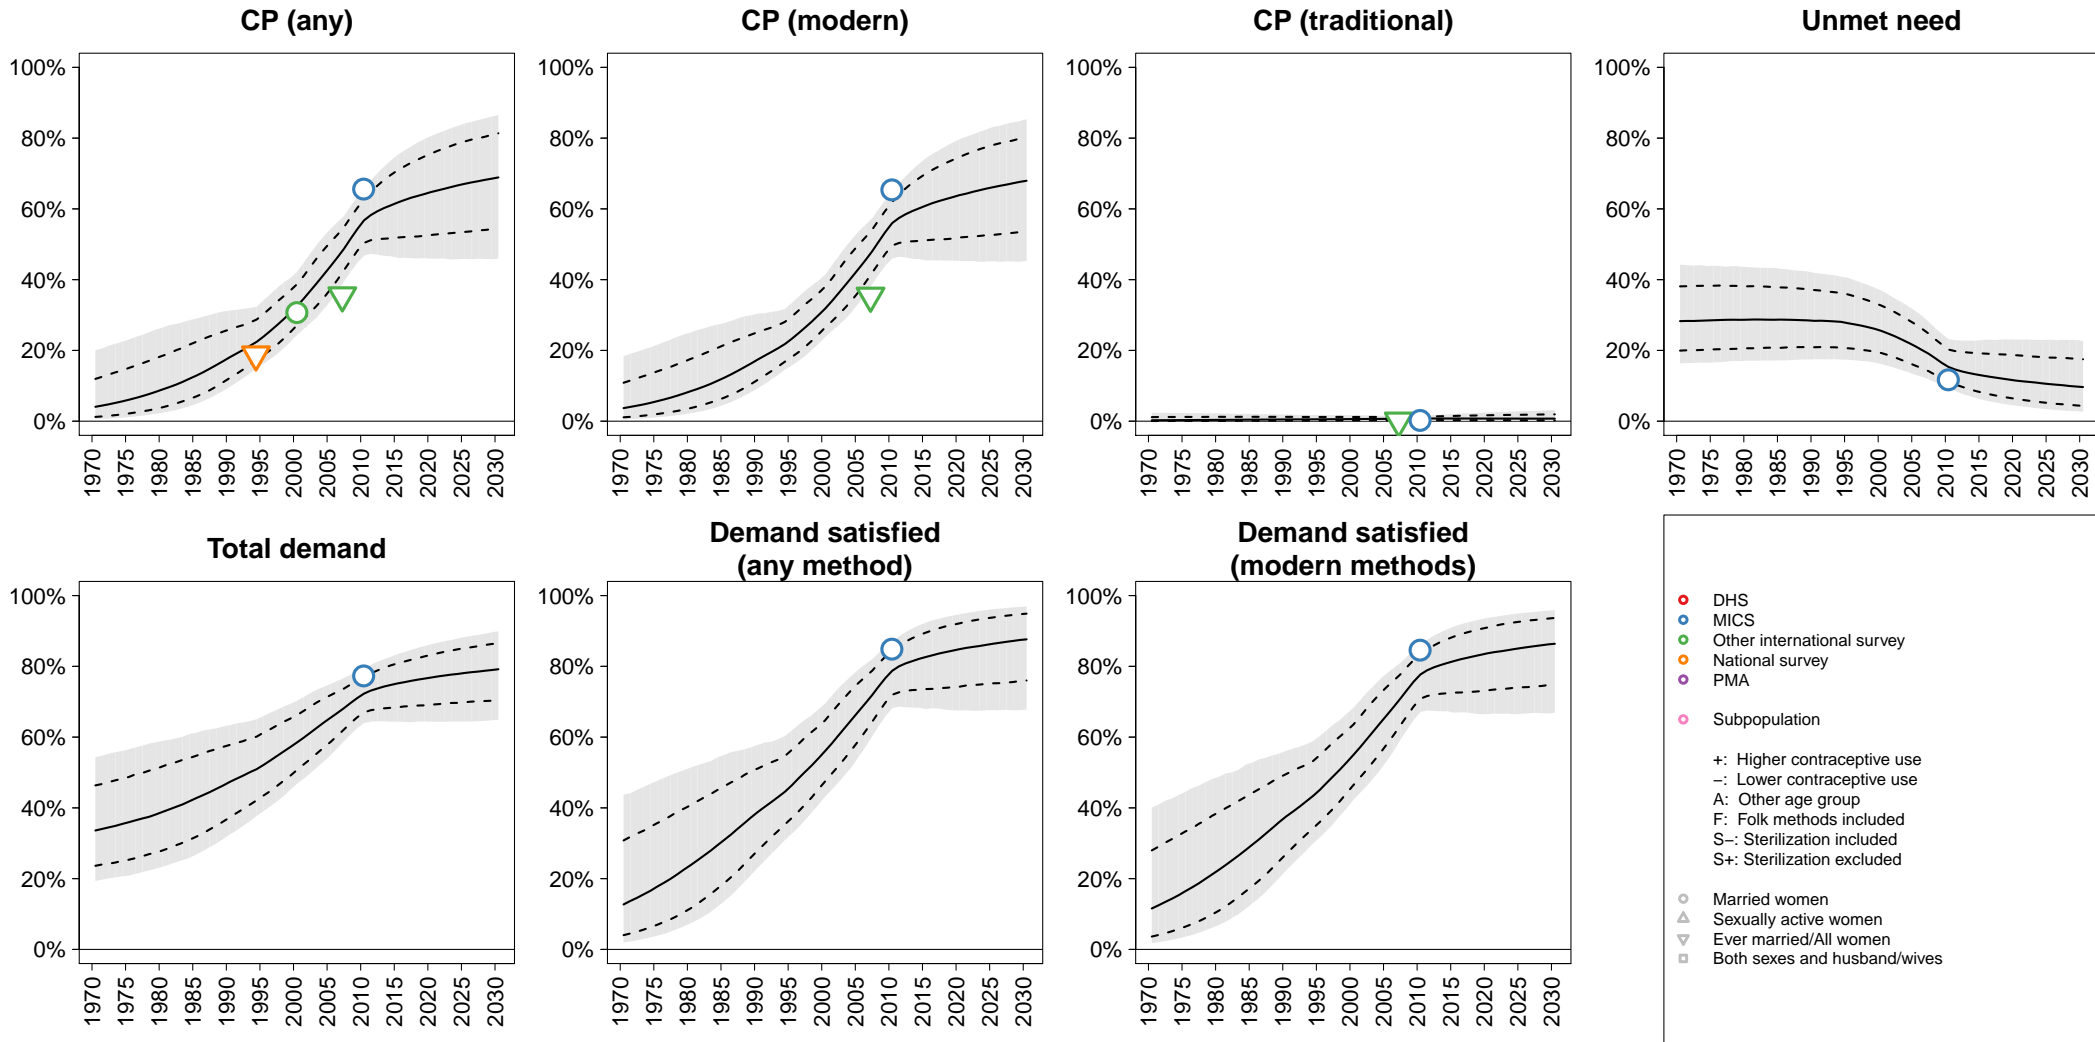

Bolivia, Plurinational State of (South America) --- Married / In-Union

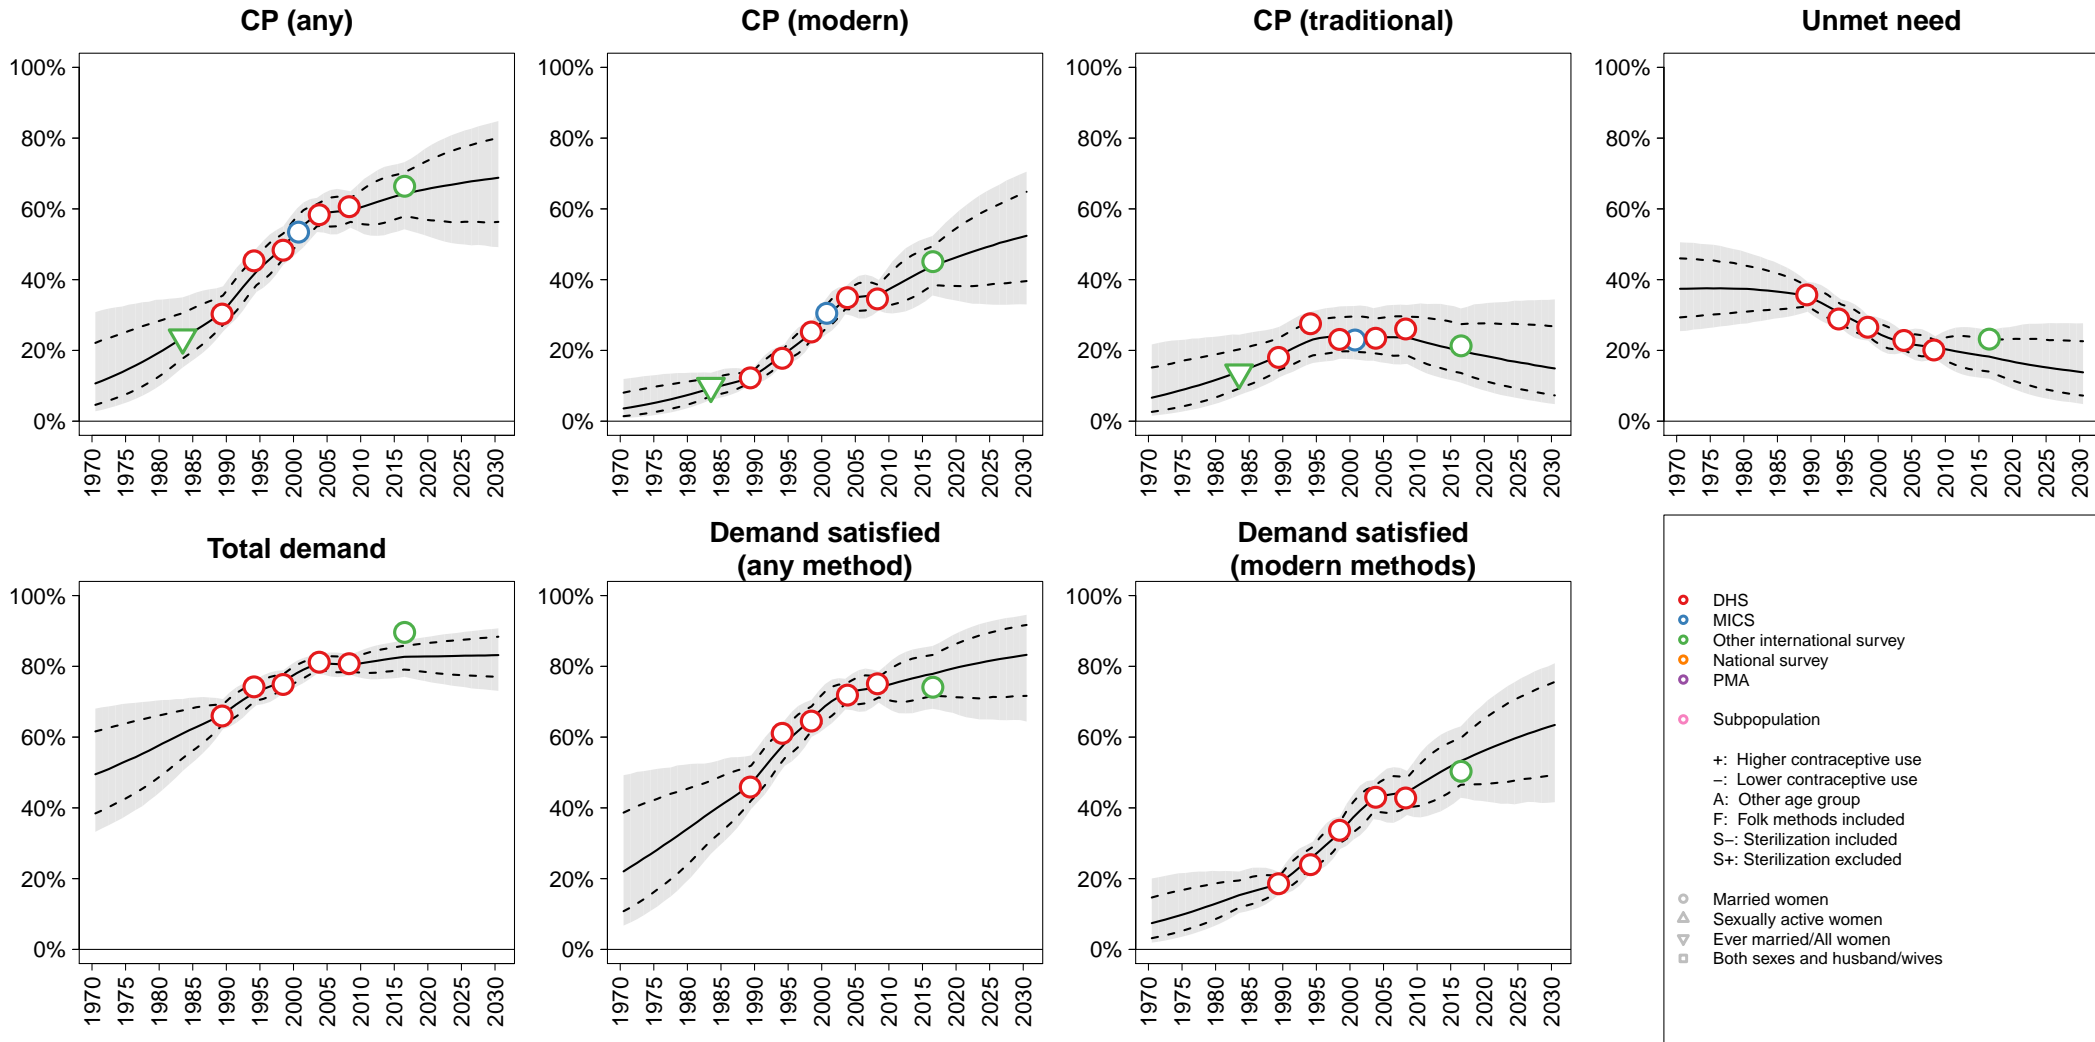

Bosnia and Herzegovina (Southern Europe) --- Married / In-Union

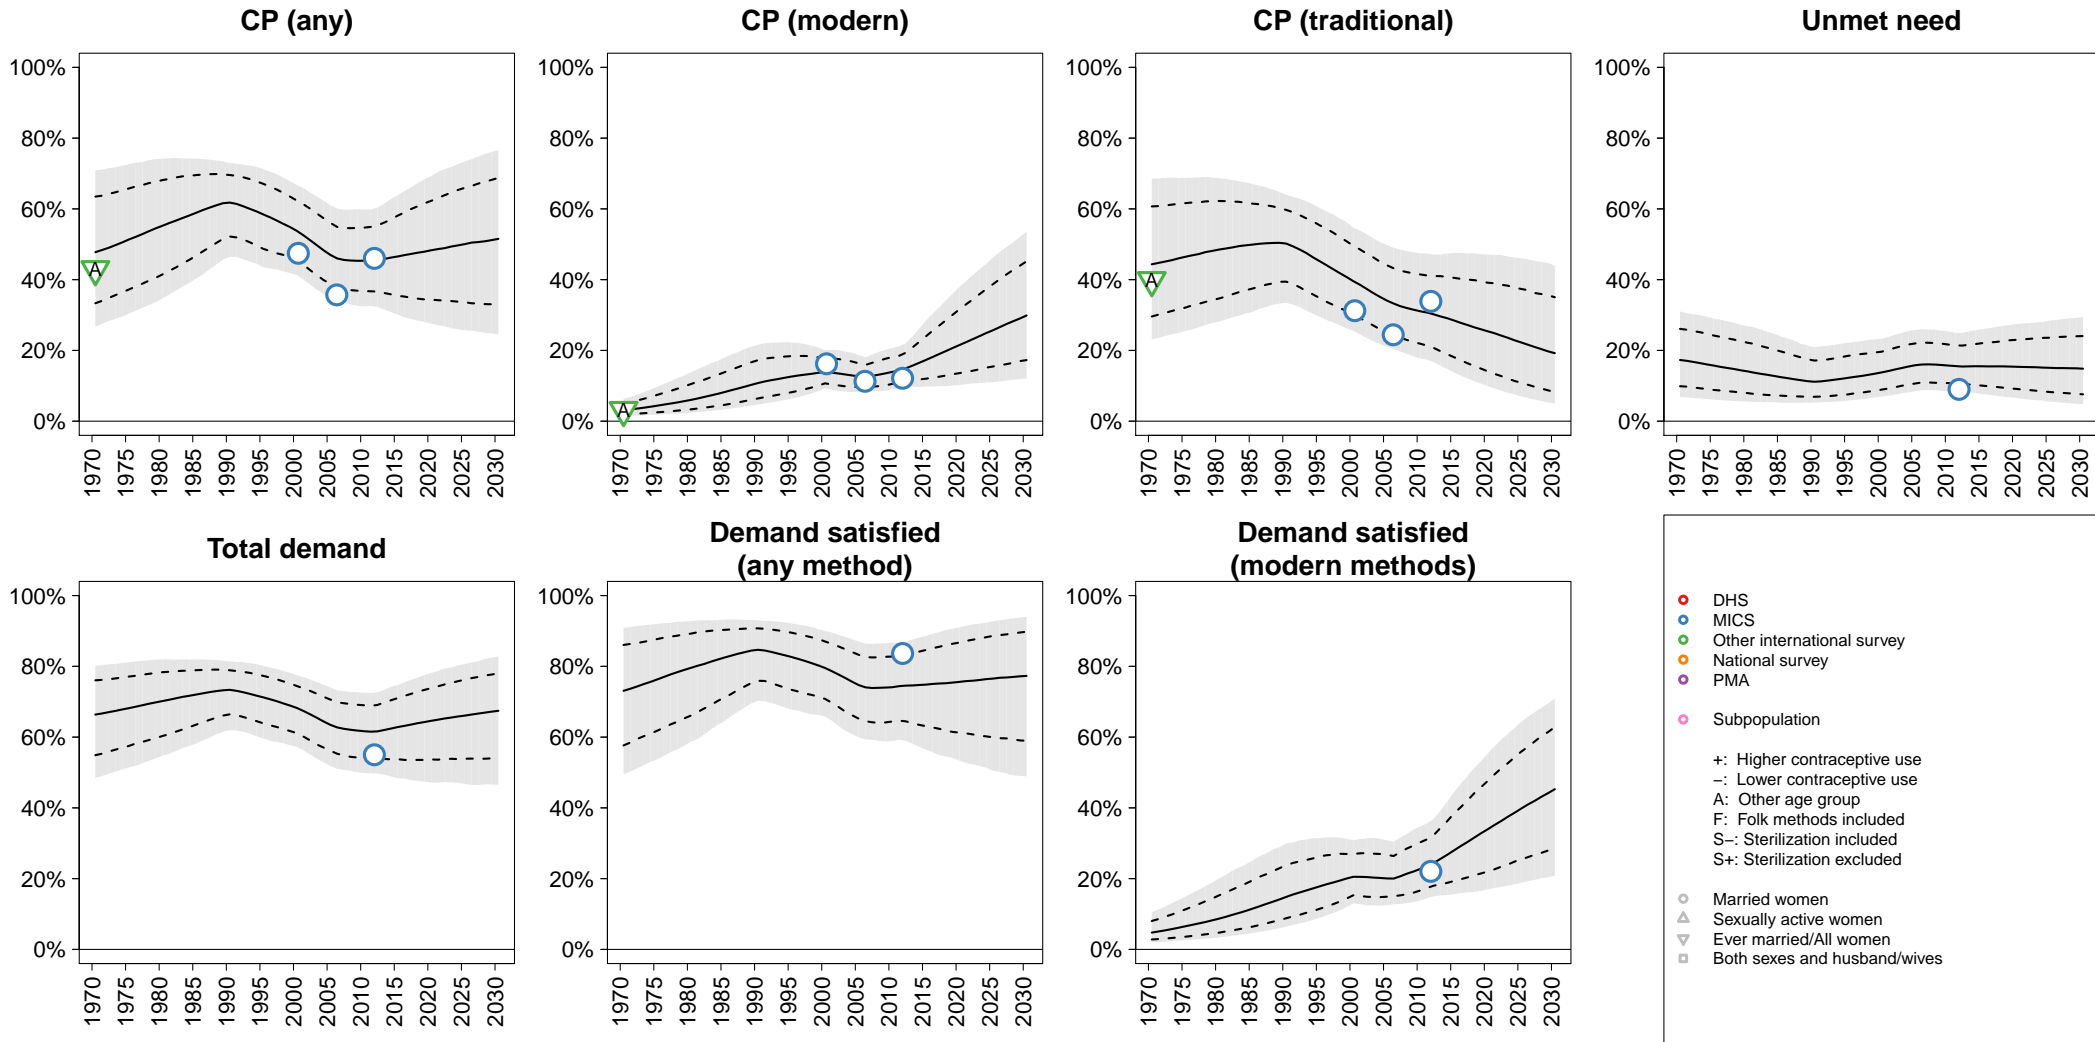

Botswana (Southern Africa) --- Married / In-Union

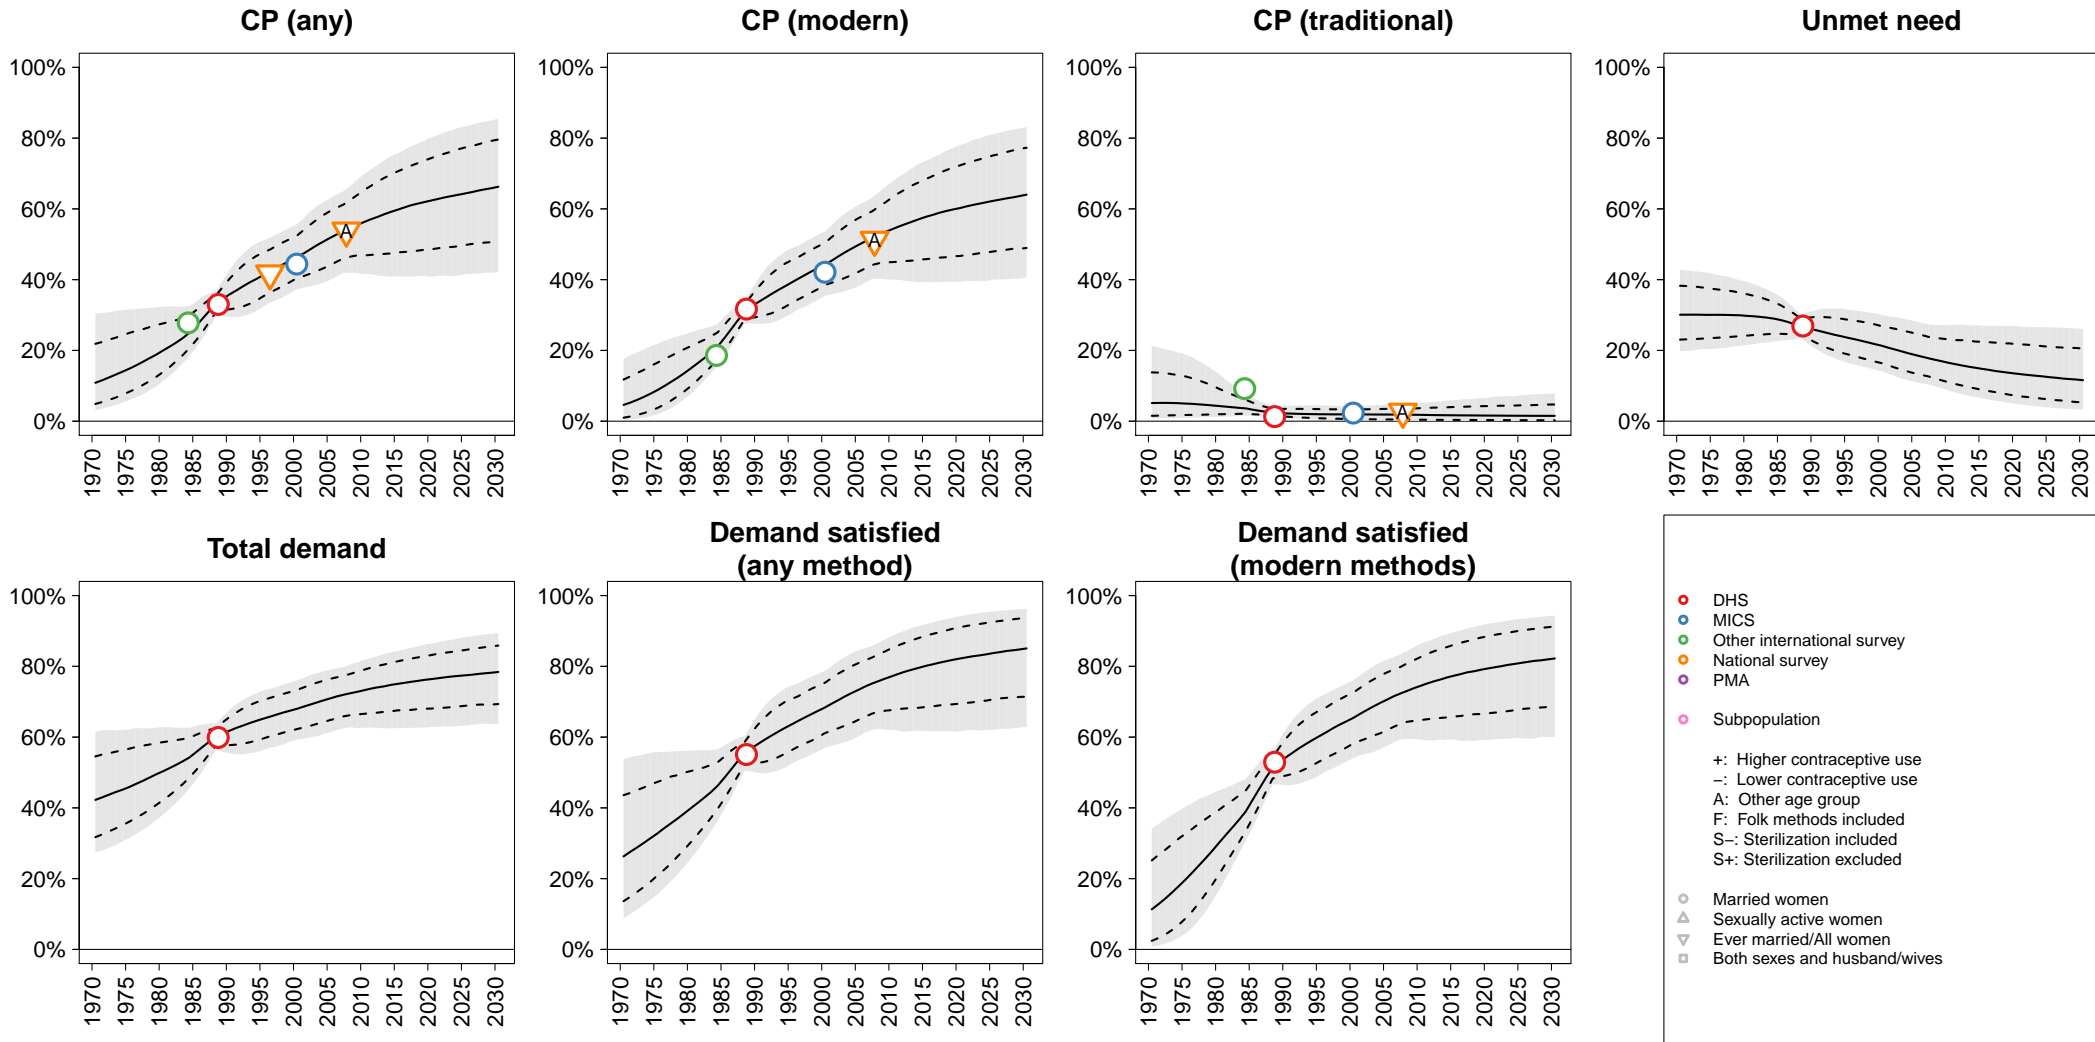

Brazil (South America) --- Married / In-Union

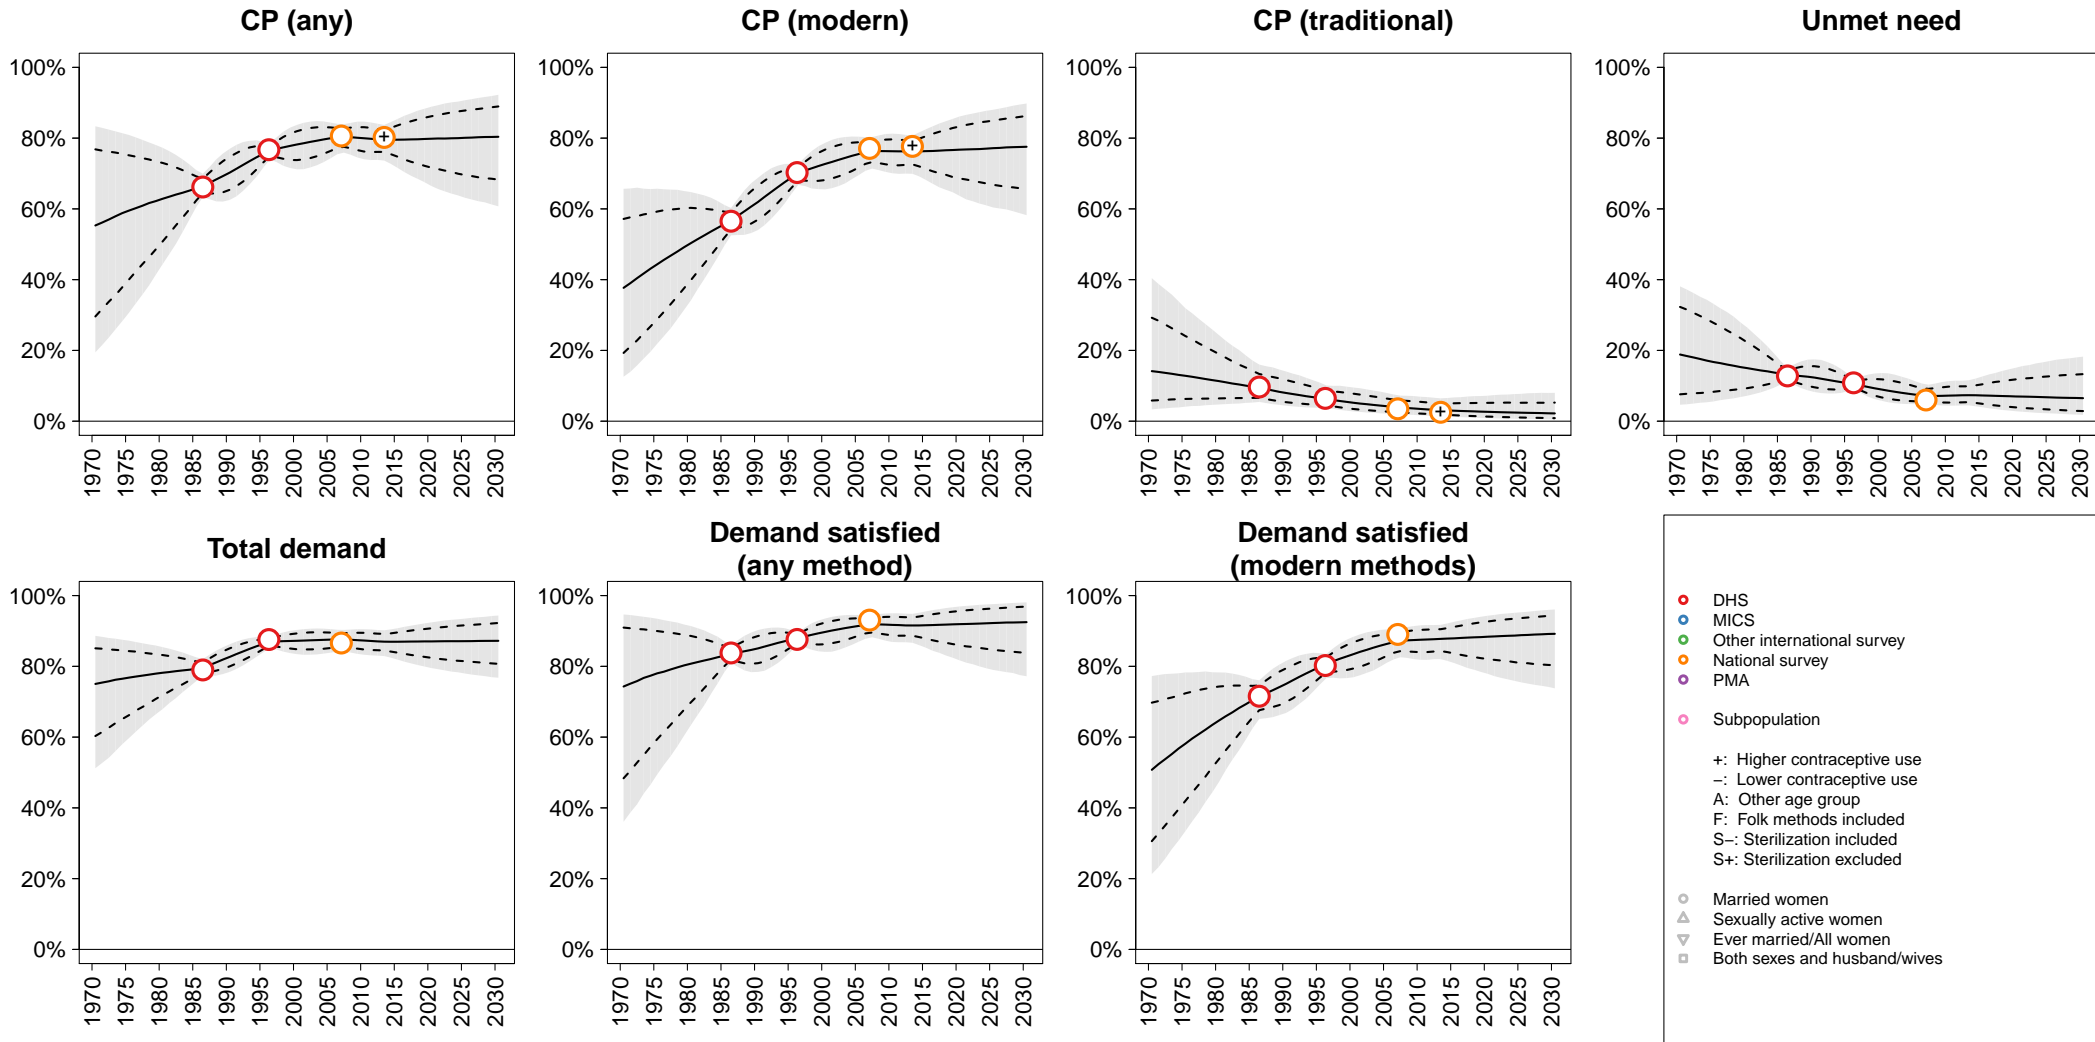

Bulgaria (Eastern Europe) --- Married / In-Union

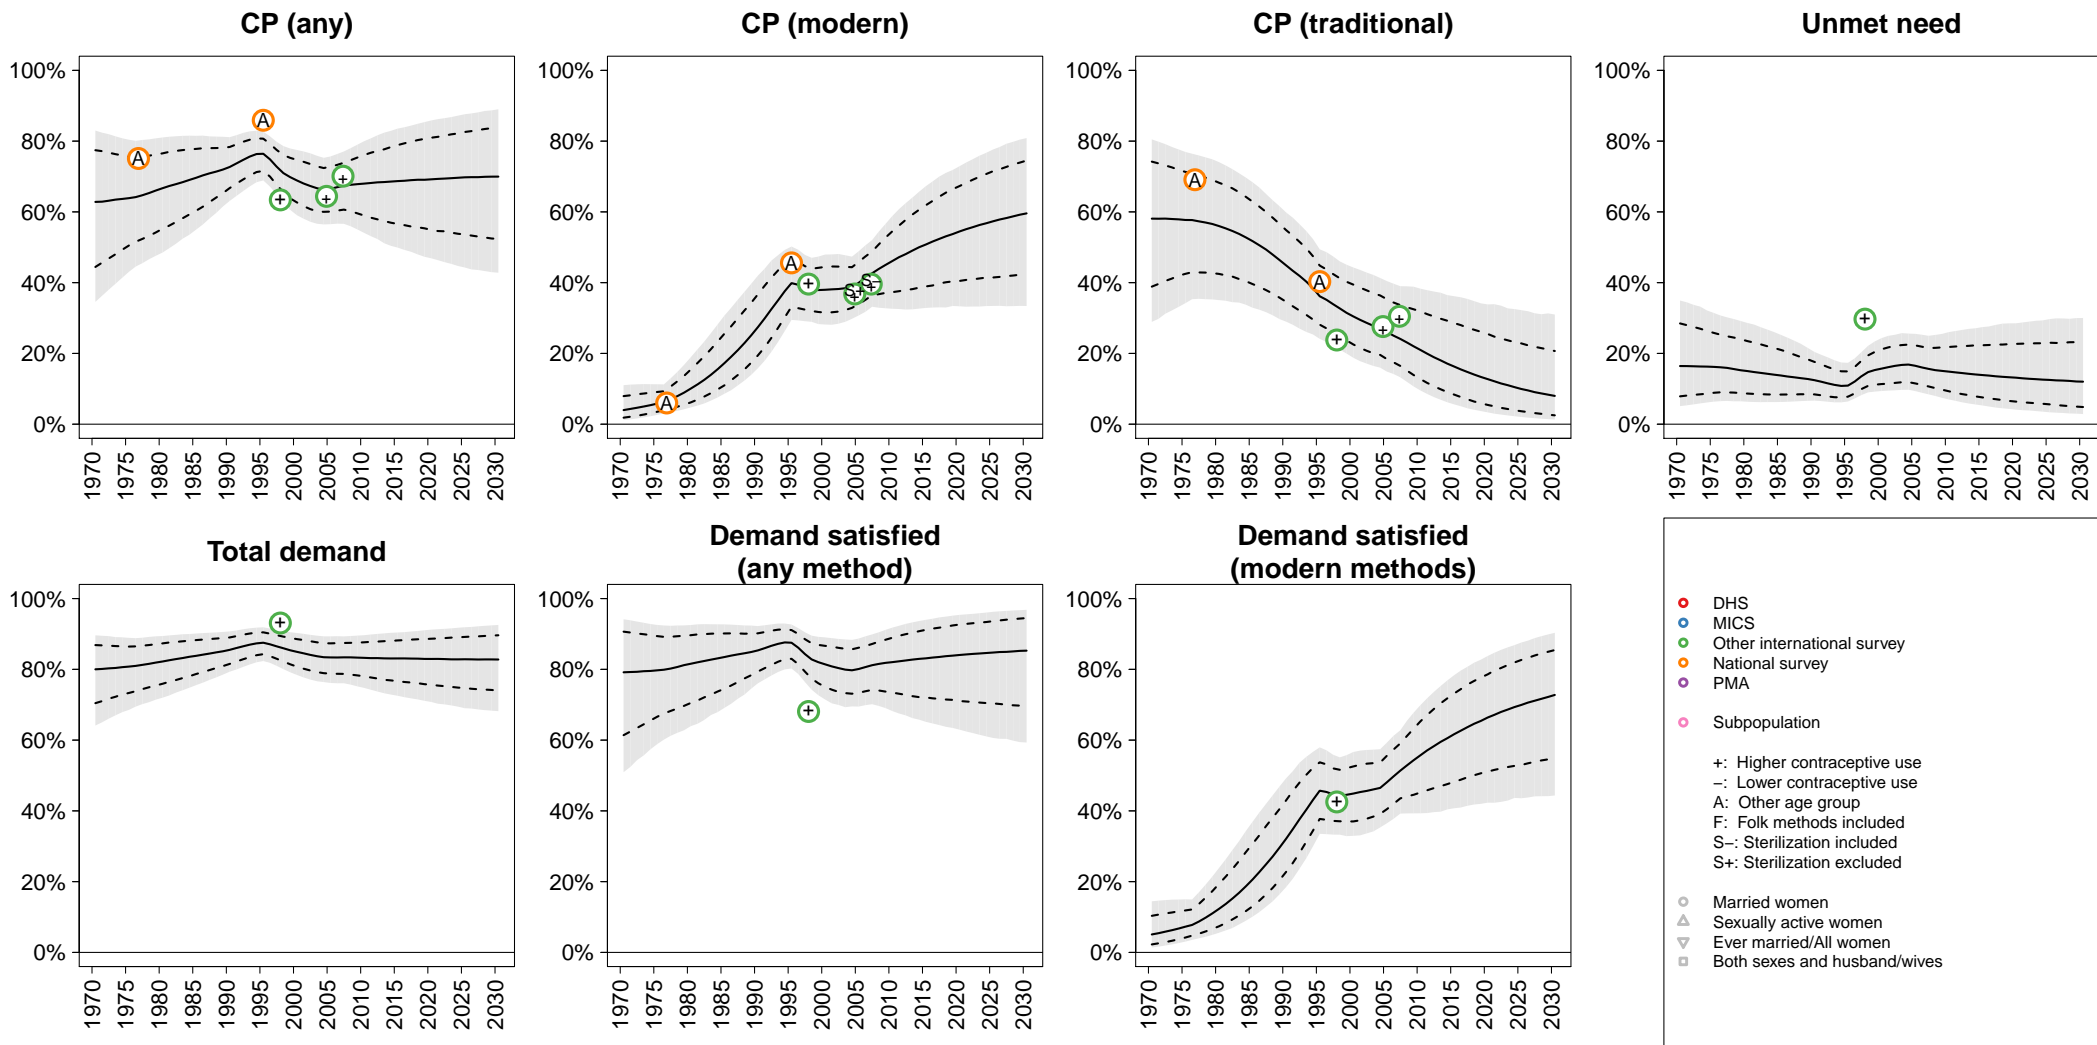

Burkina Faso (Western Africa) --- Married / In-Union

CP (any)

CP (modern)

CP (traditional)

Unmet need

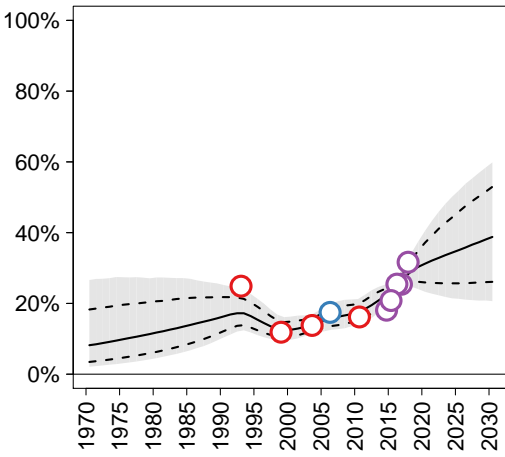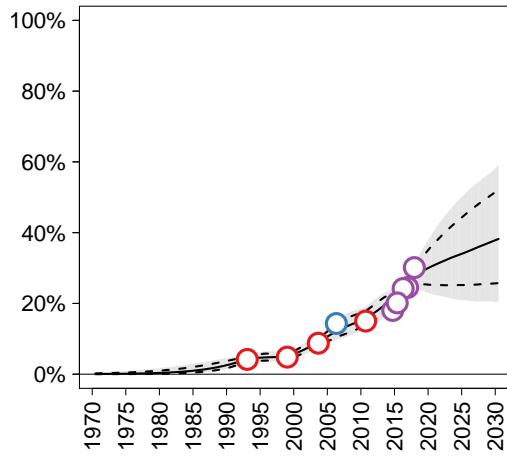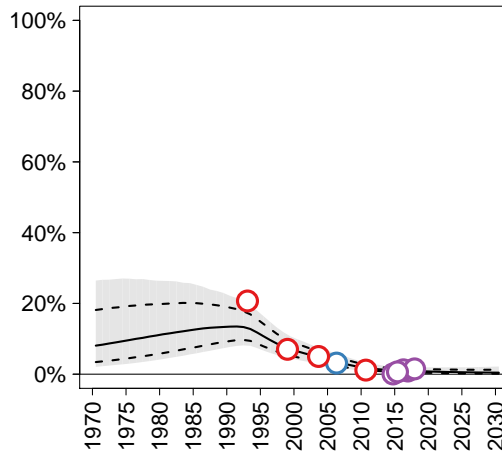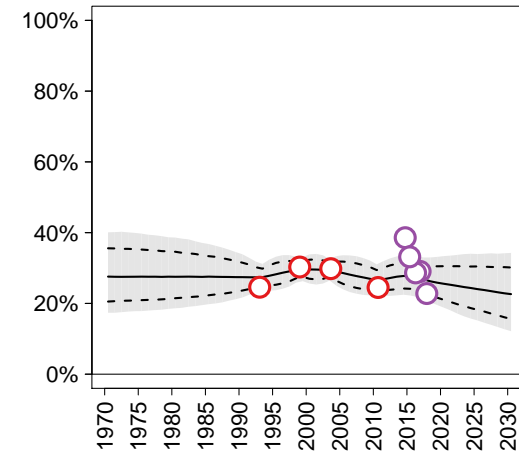

Total demand

Demand satisfied (any method)

Demand satisfied (modern methods)

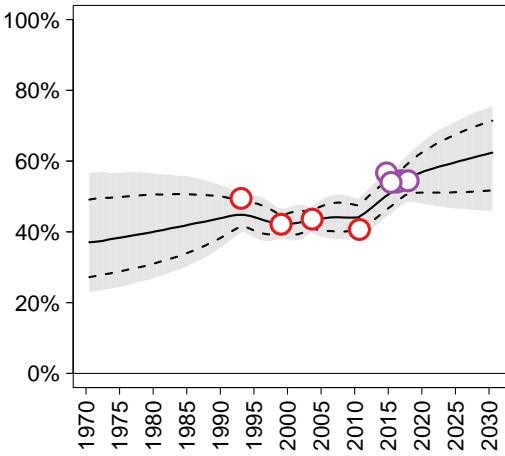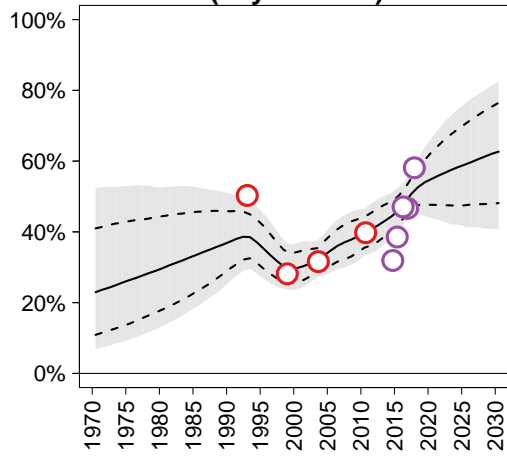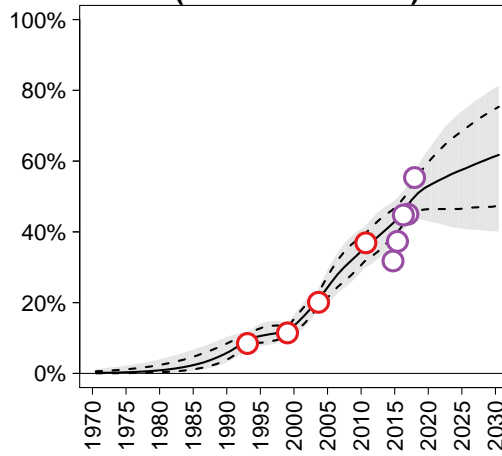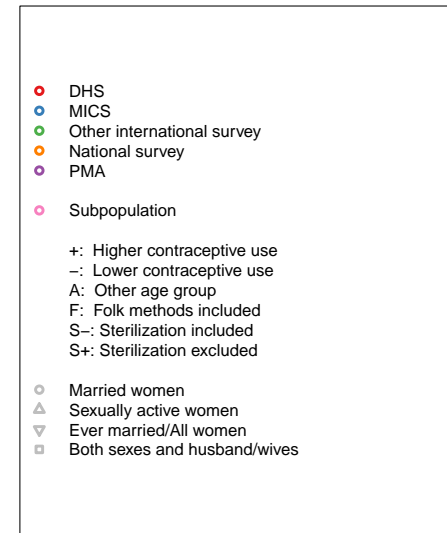



Burundi (Eastern Africa) --- Married / In-Union

CP (any)

CP (modern)

CP (traditional)

Unmet need

Total demand

Demand satisfied (any method)

Demand satisfied (modern methods)

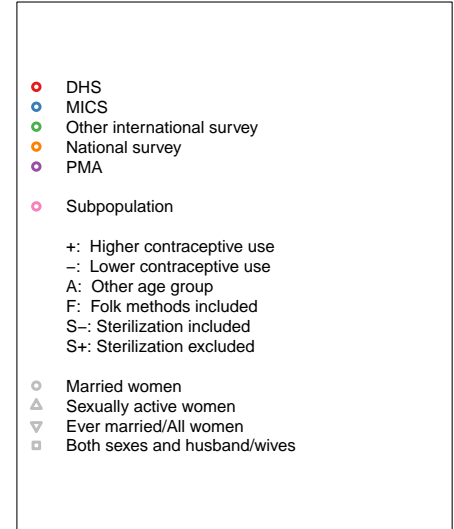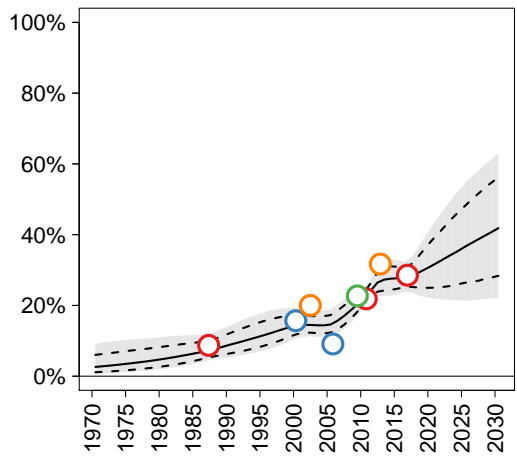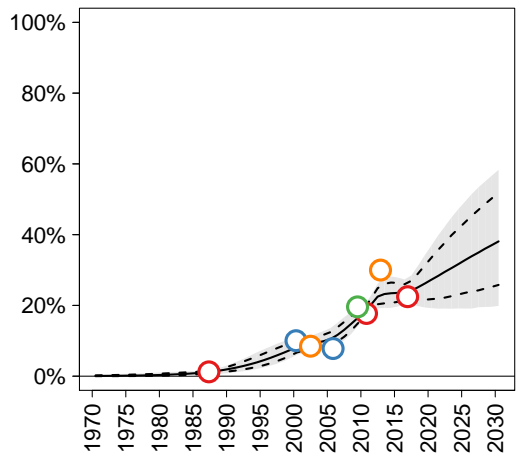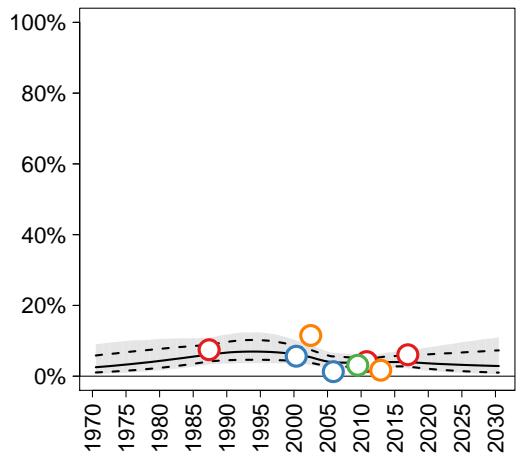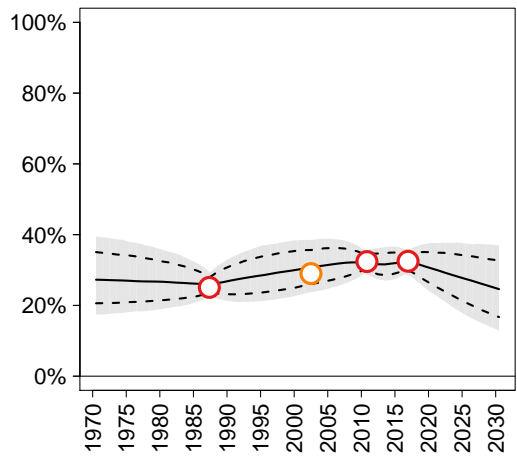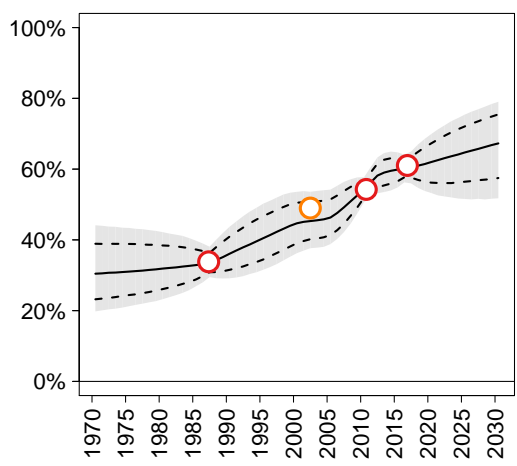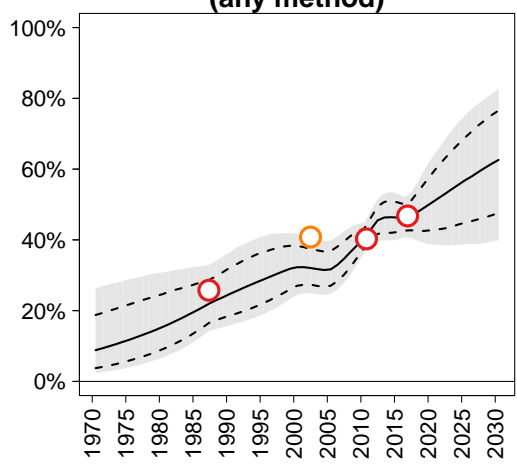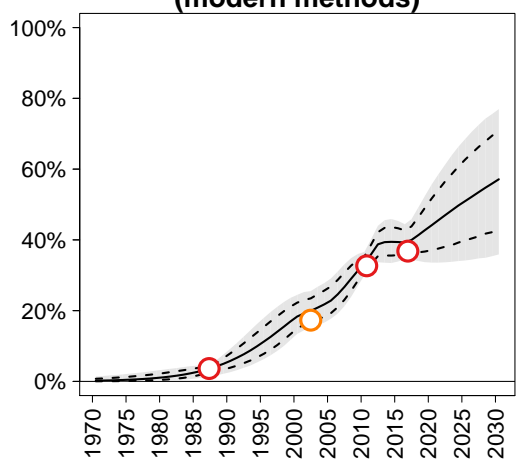

Cabo Verde (Western Africa) --- Married / In-Union

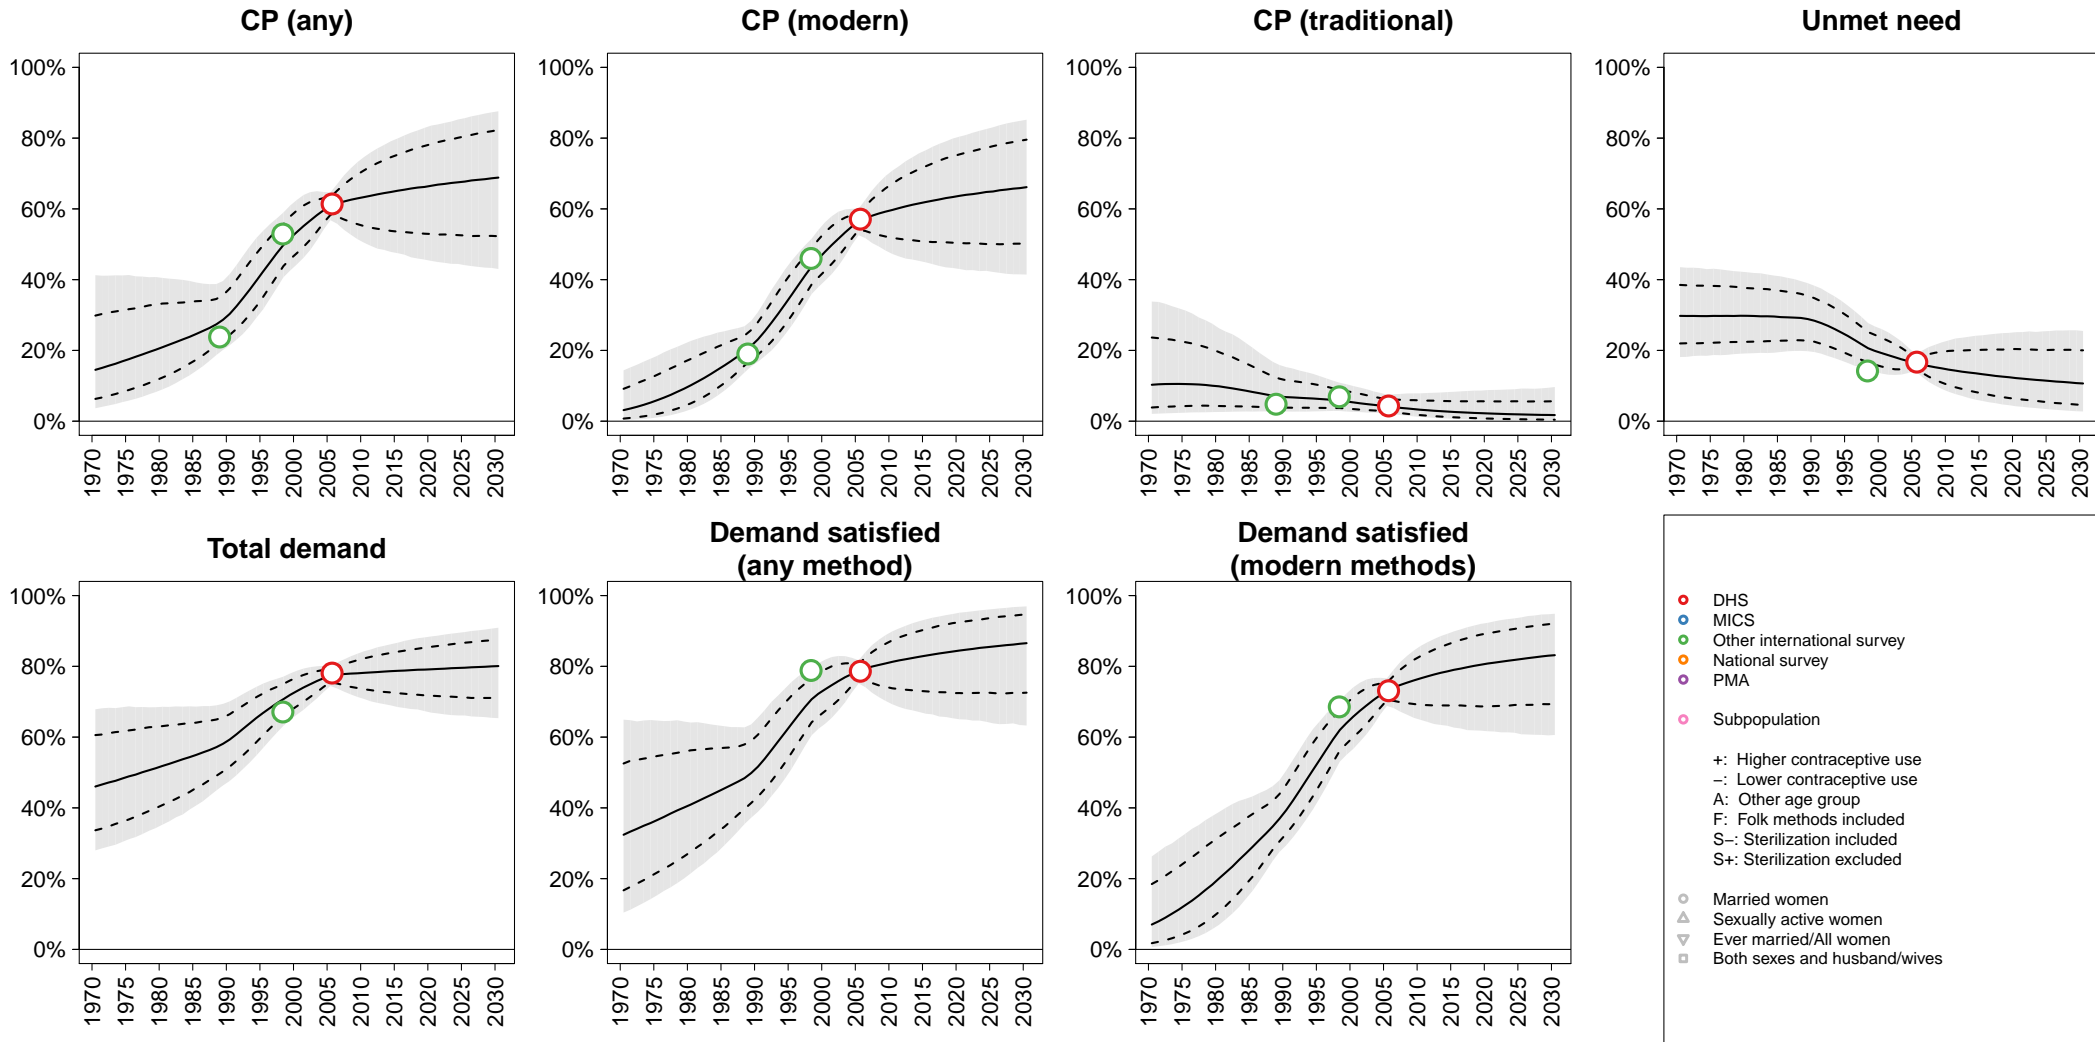

Cambodia (South-eastern Asia) --- Married / In-Union

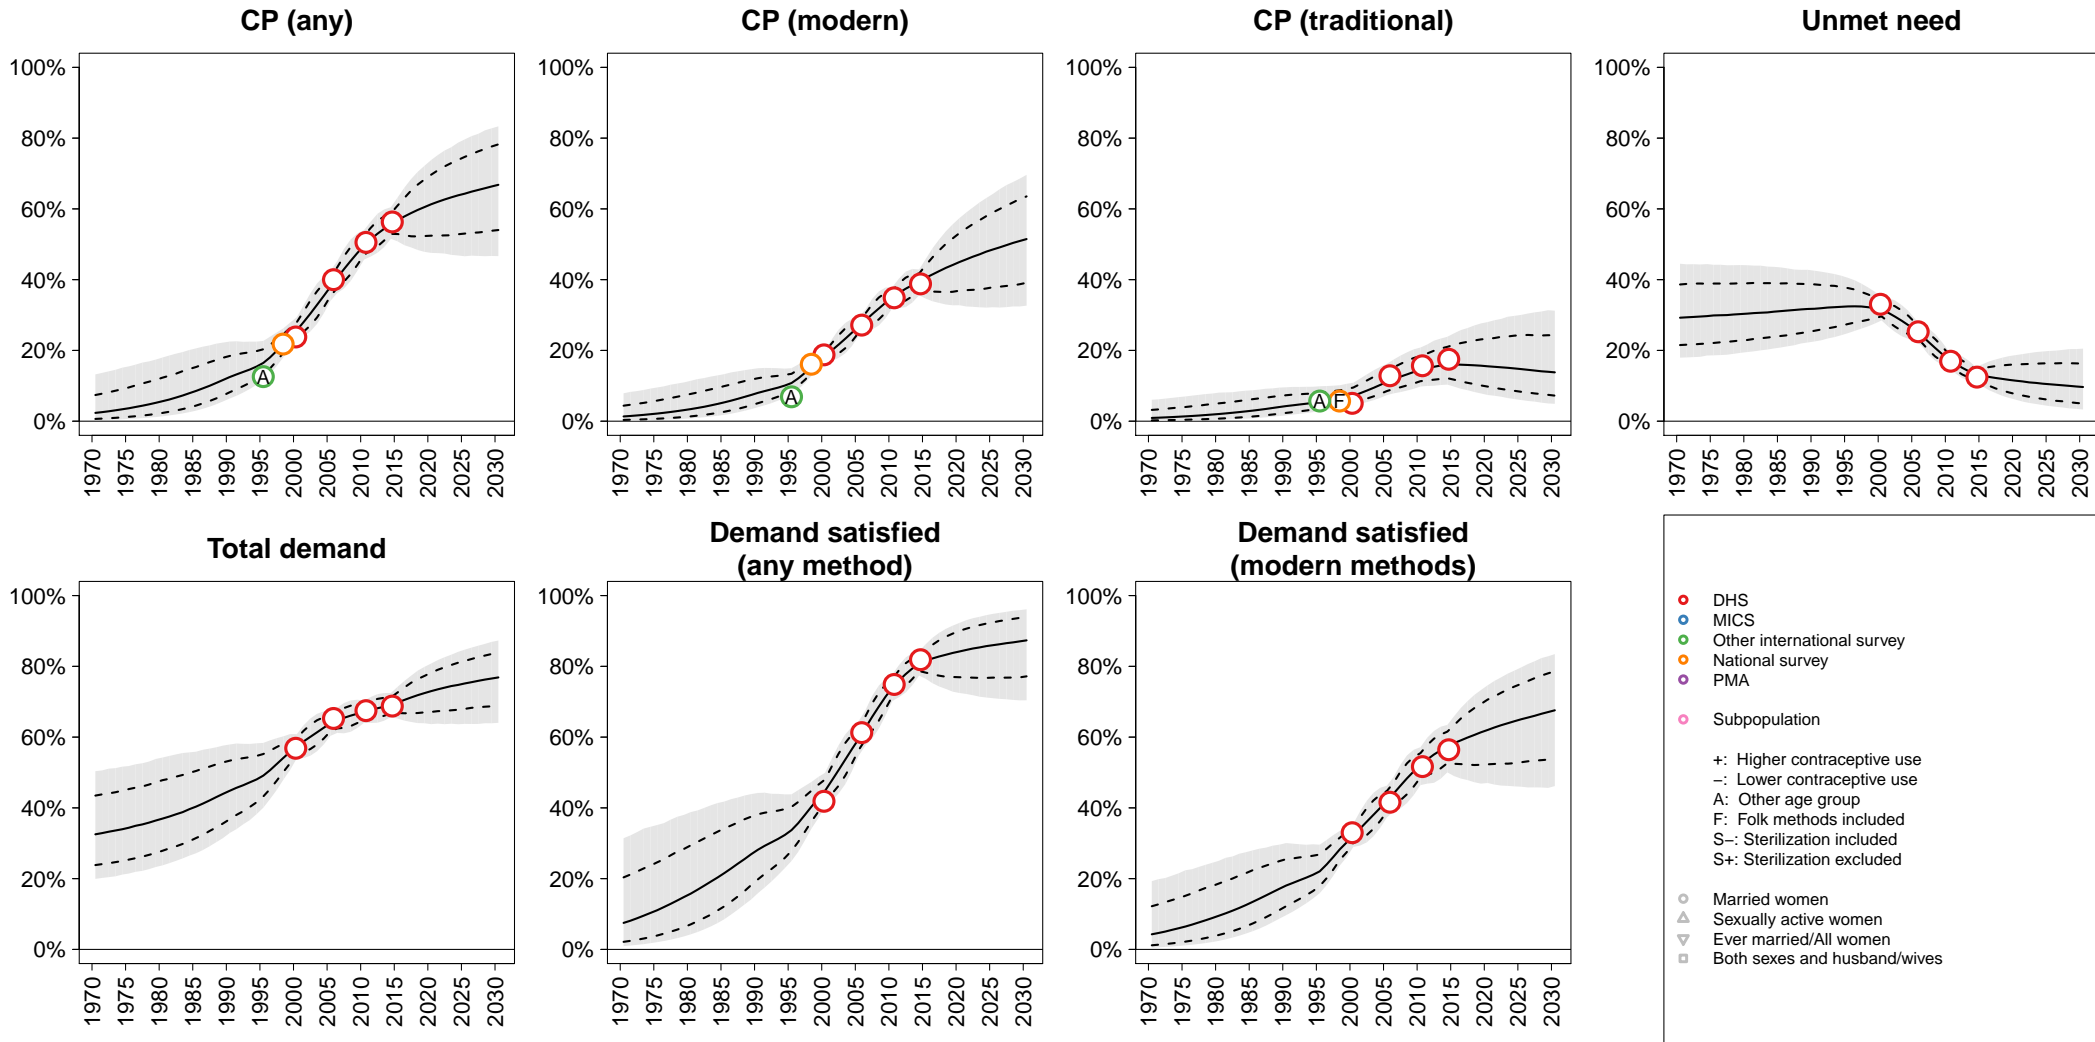

Cameroon (Middle Africa) --- Married / In-Union

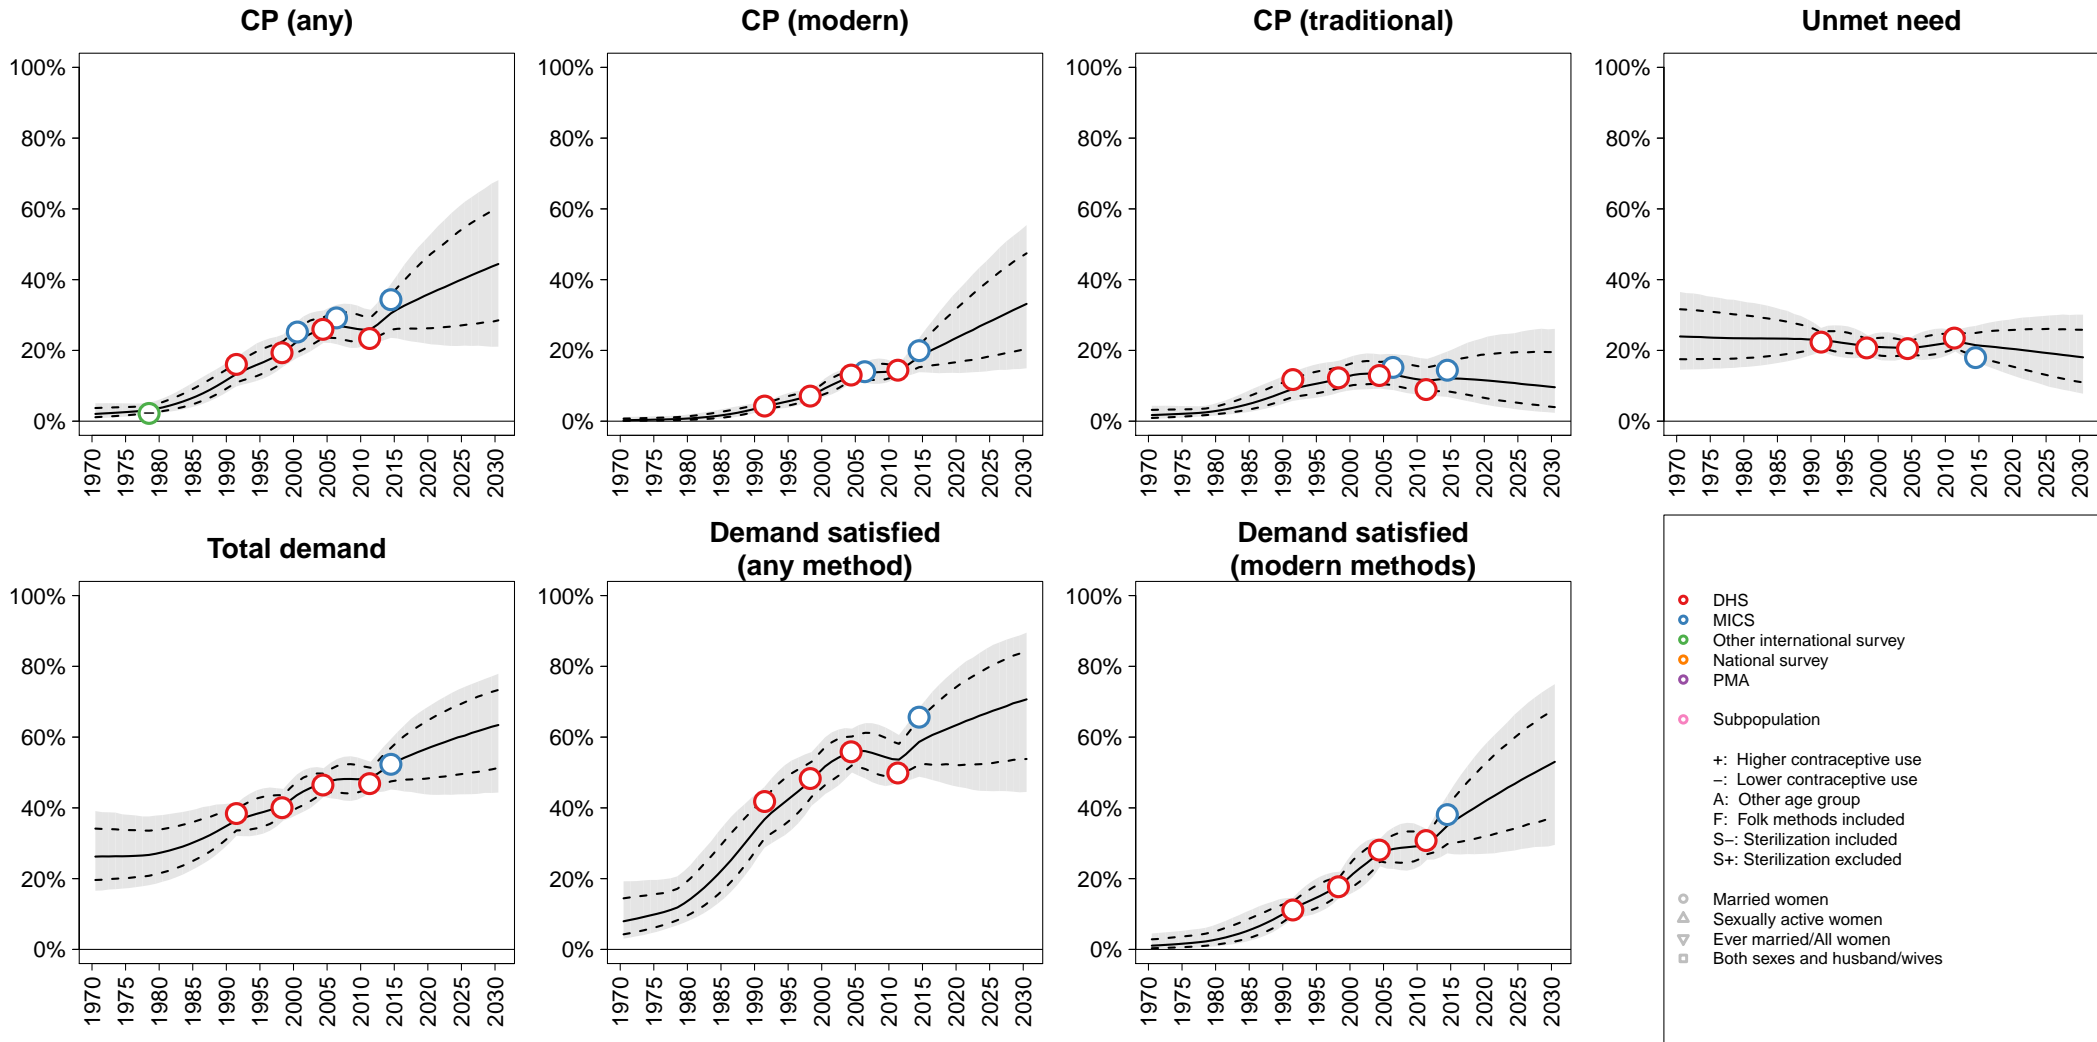

Canada (Northern America) --- Married / In-Union

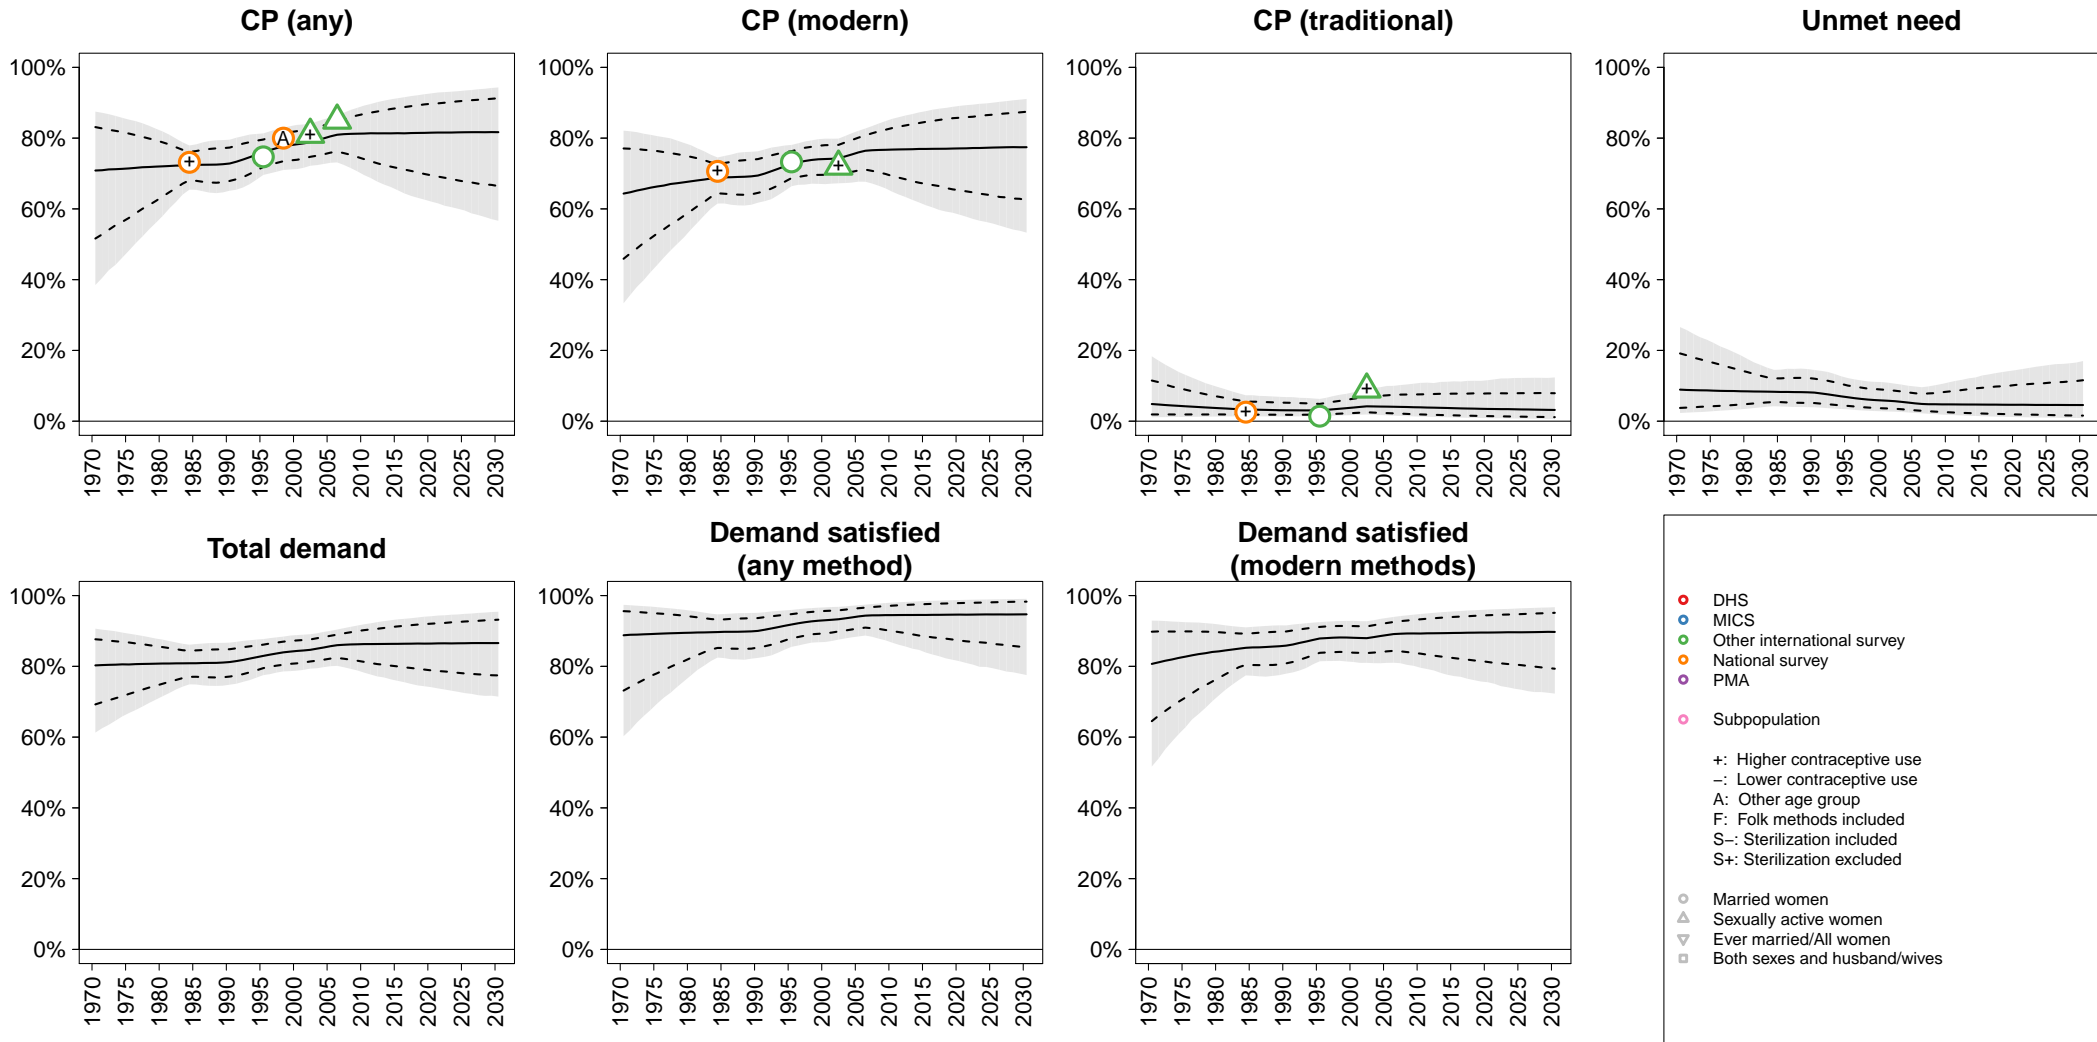

Central African Republic (Middle Africa) --- Married / In-Union

CP (any)

CP (modern)

CP (traditional)

Unmet need

Total demand

Demand satisfied (any method)

Demand satisfied (modern methods)

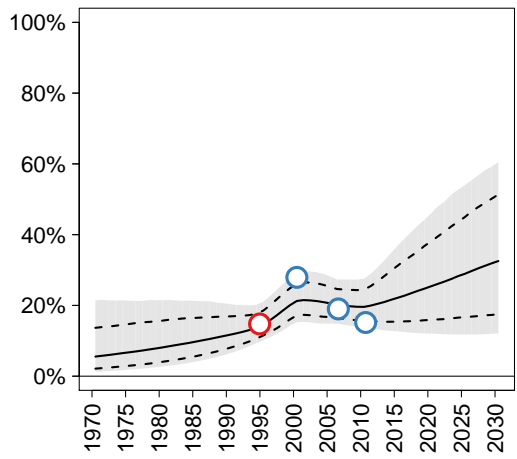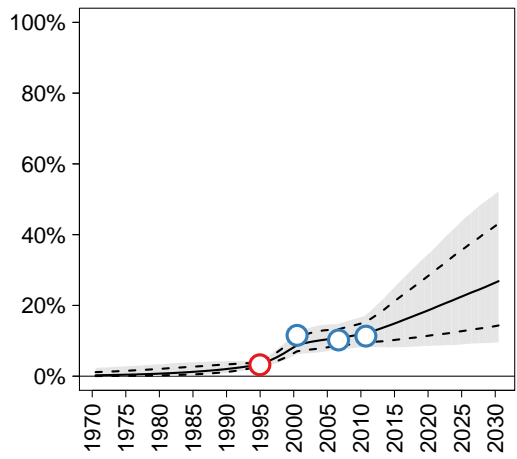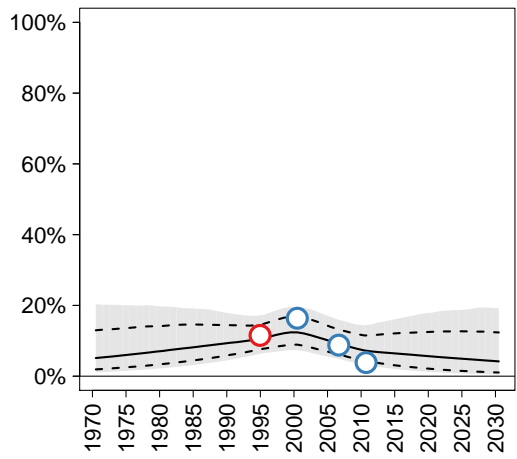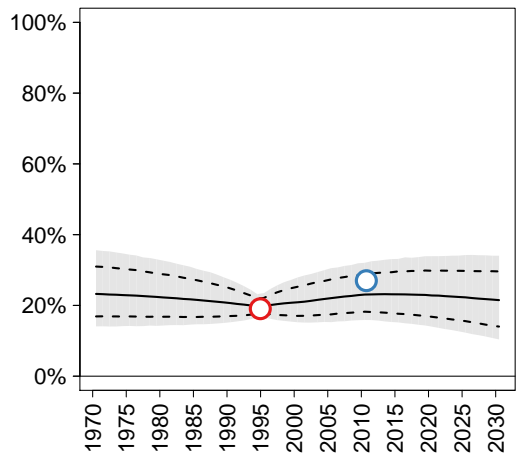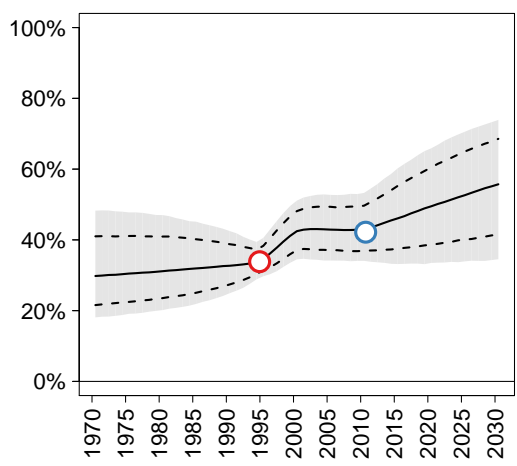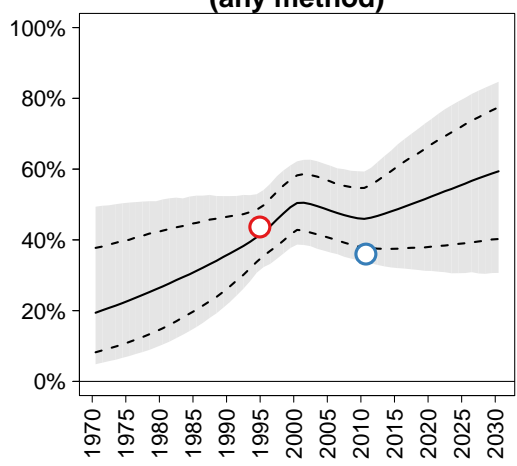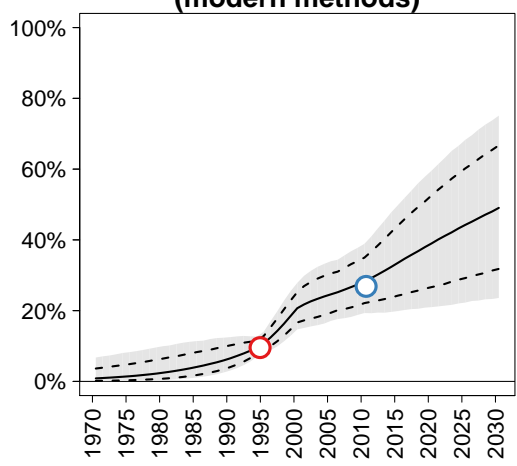

Chad (Middle Africa) --- Married / In-Union

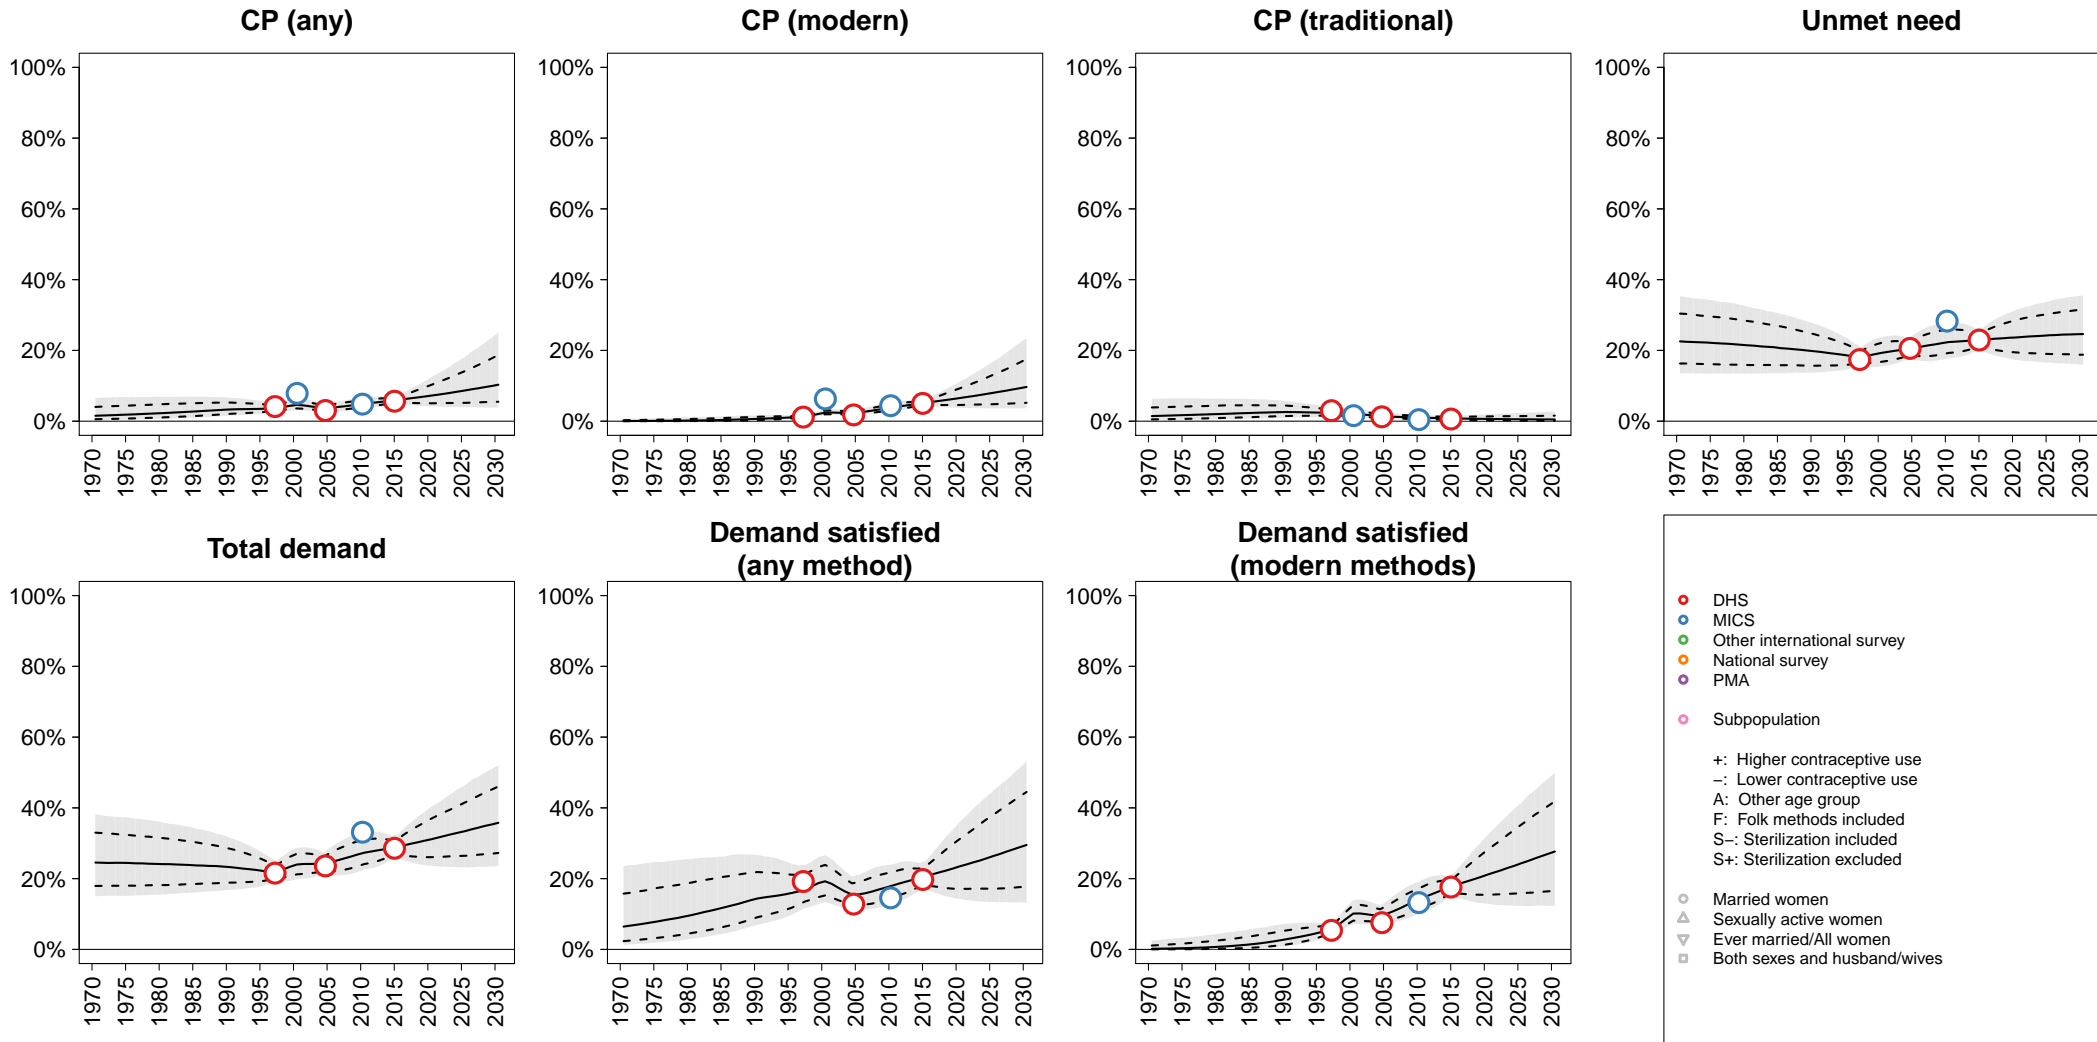

Chile (South America) --- Married / In-Union

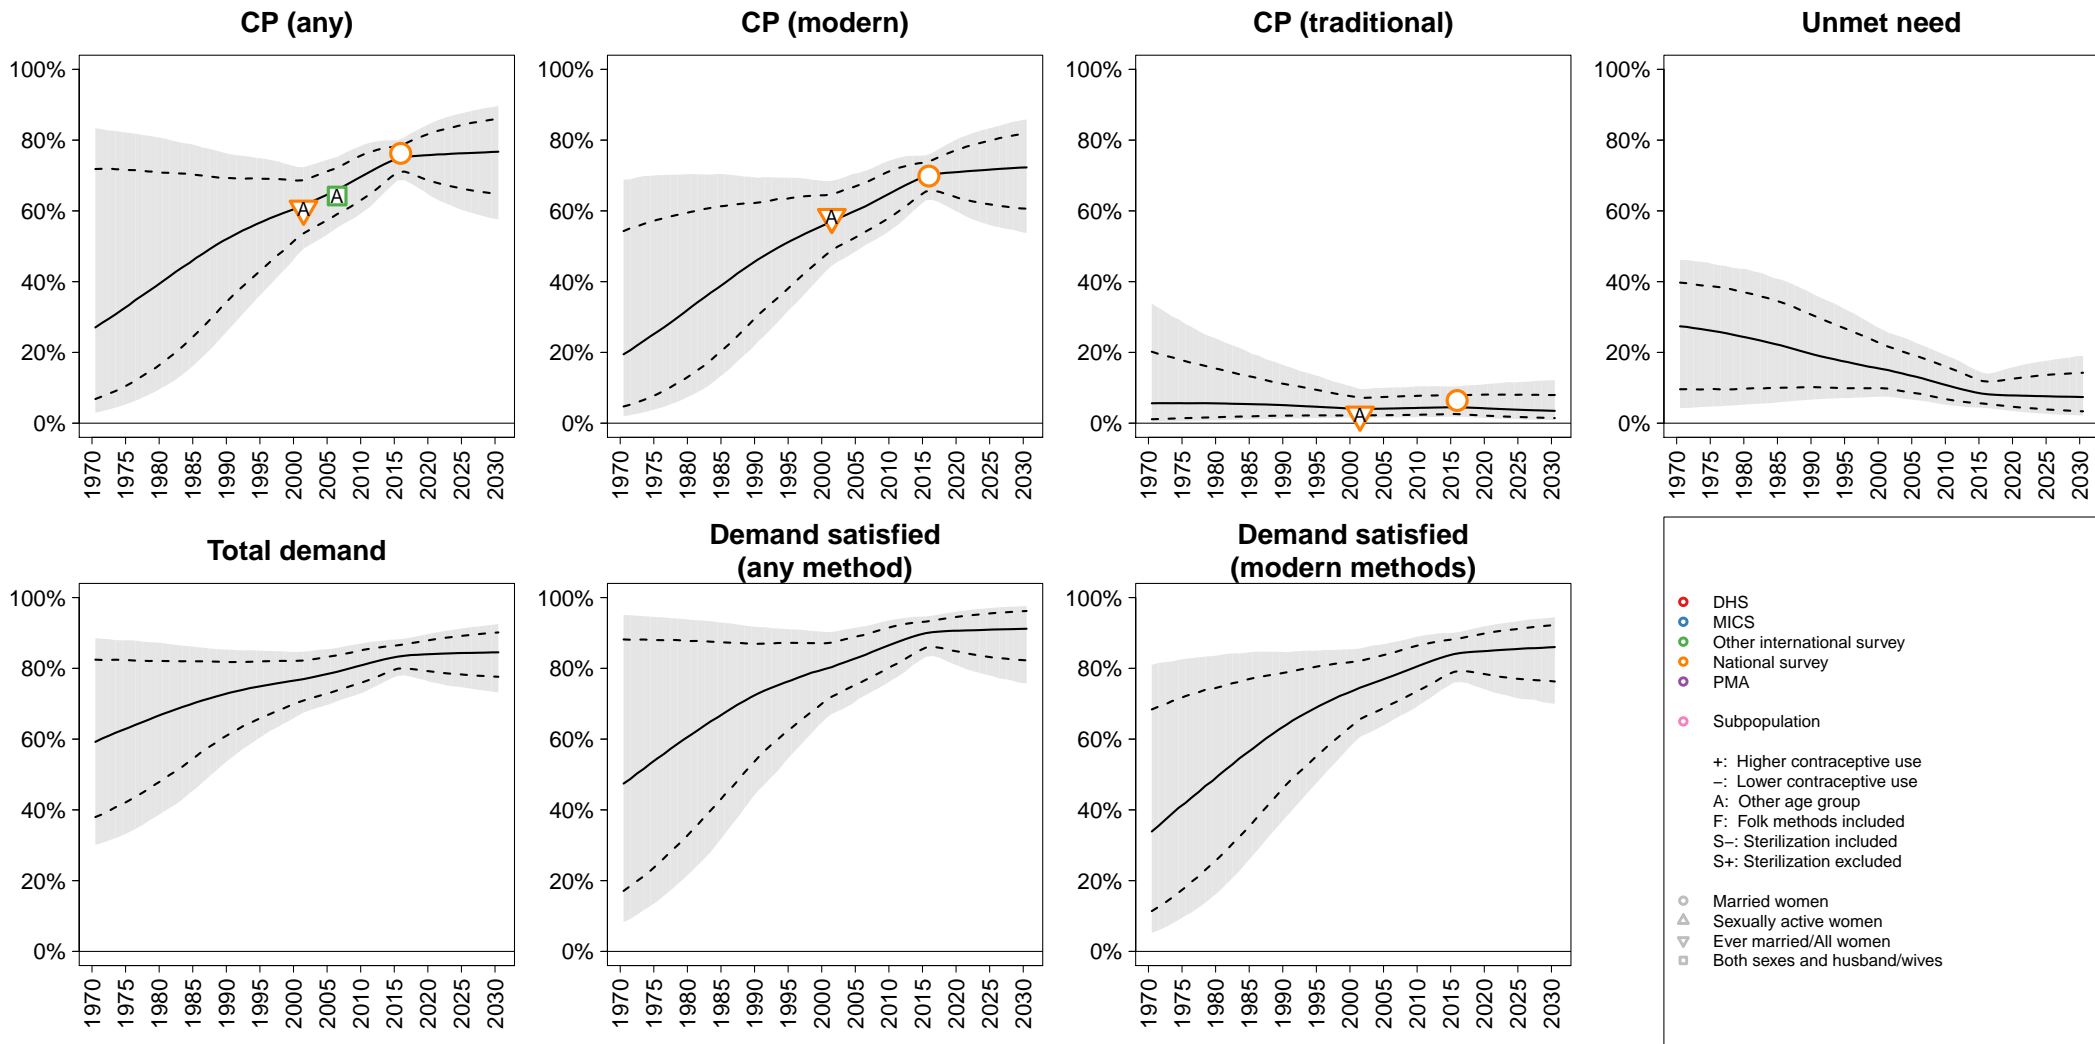



China (Eastern Asia) --- Married / In-Union

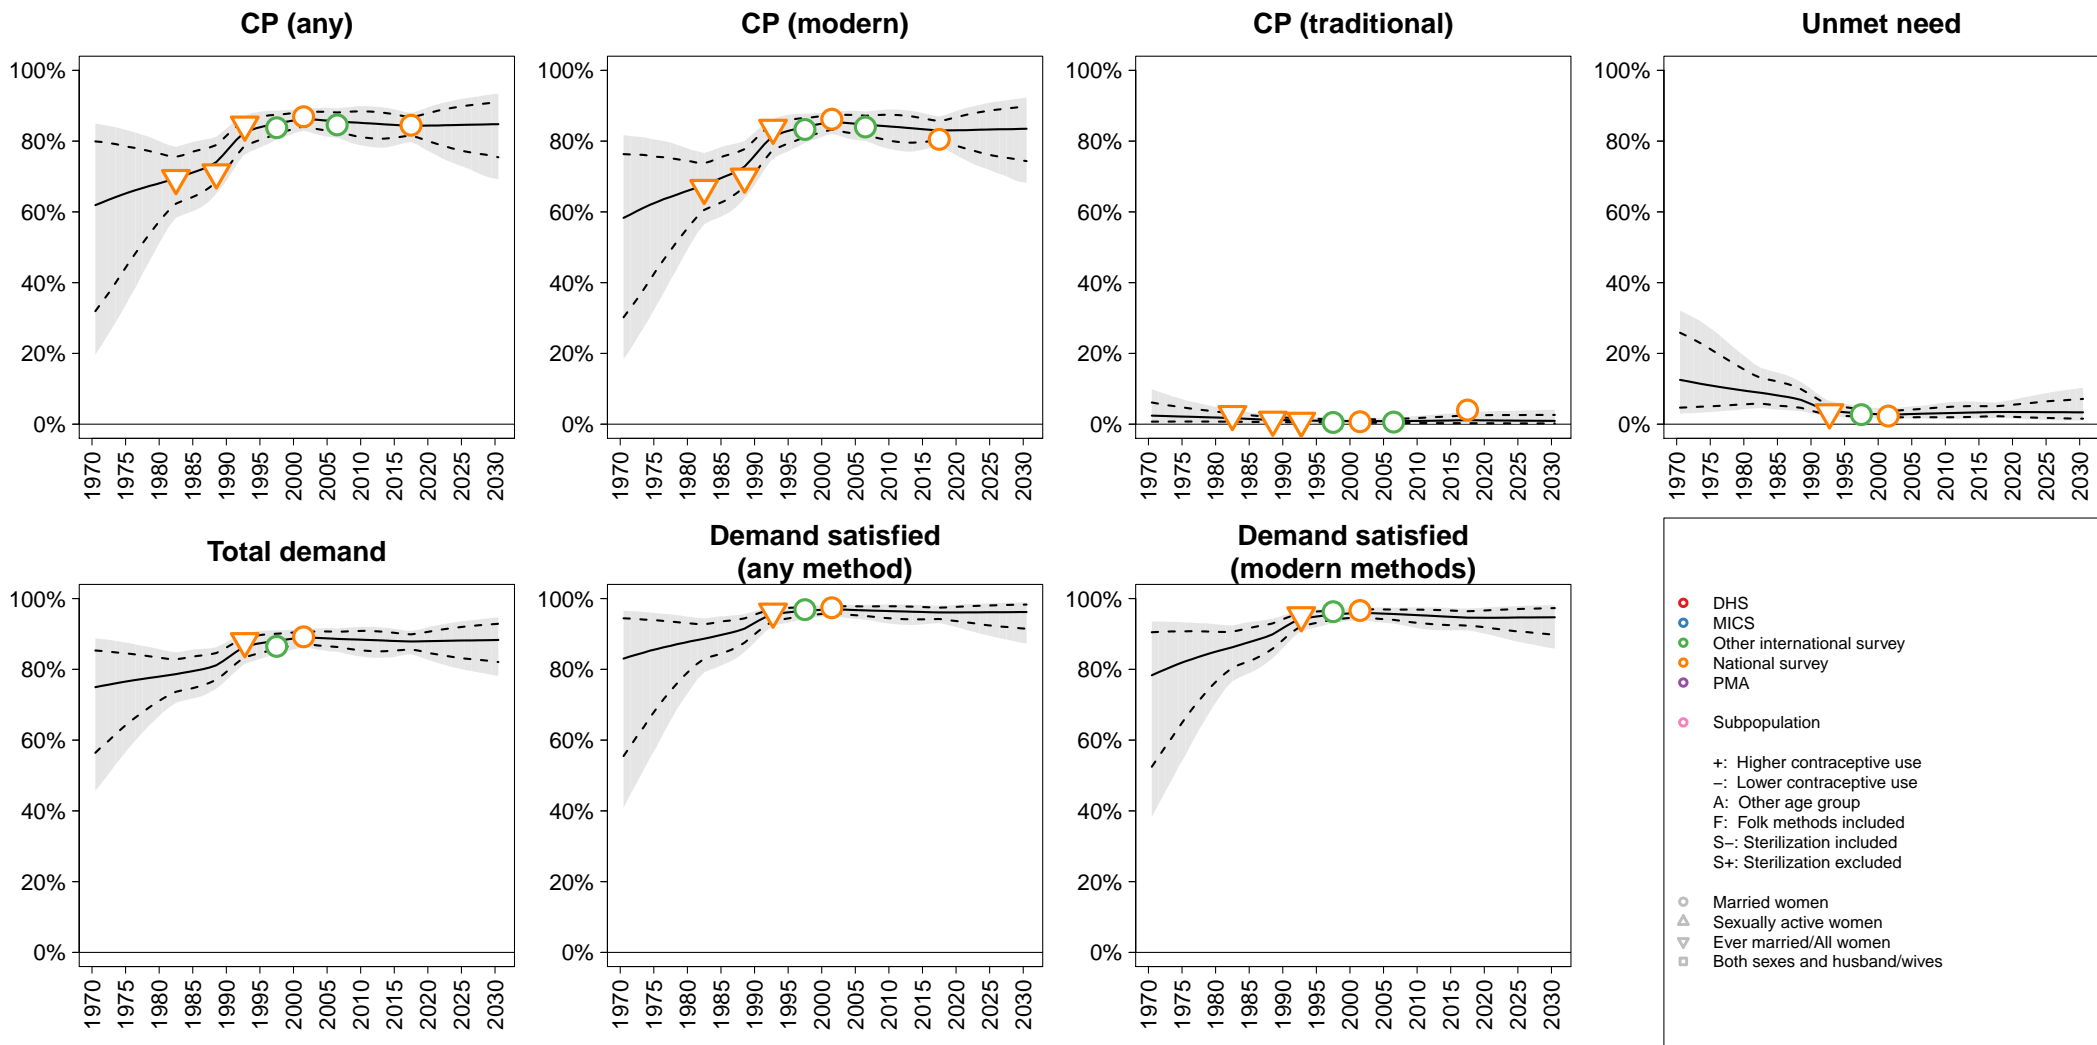

China, Hong Kong SAR (Eastern Asia) --- Married / In-Union

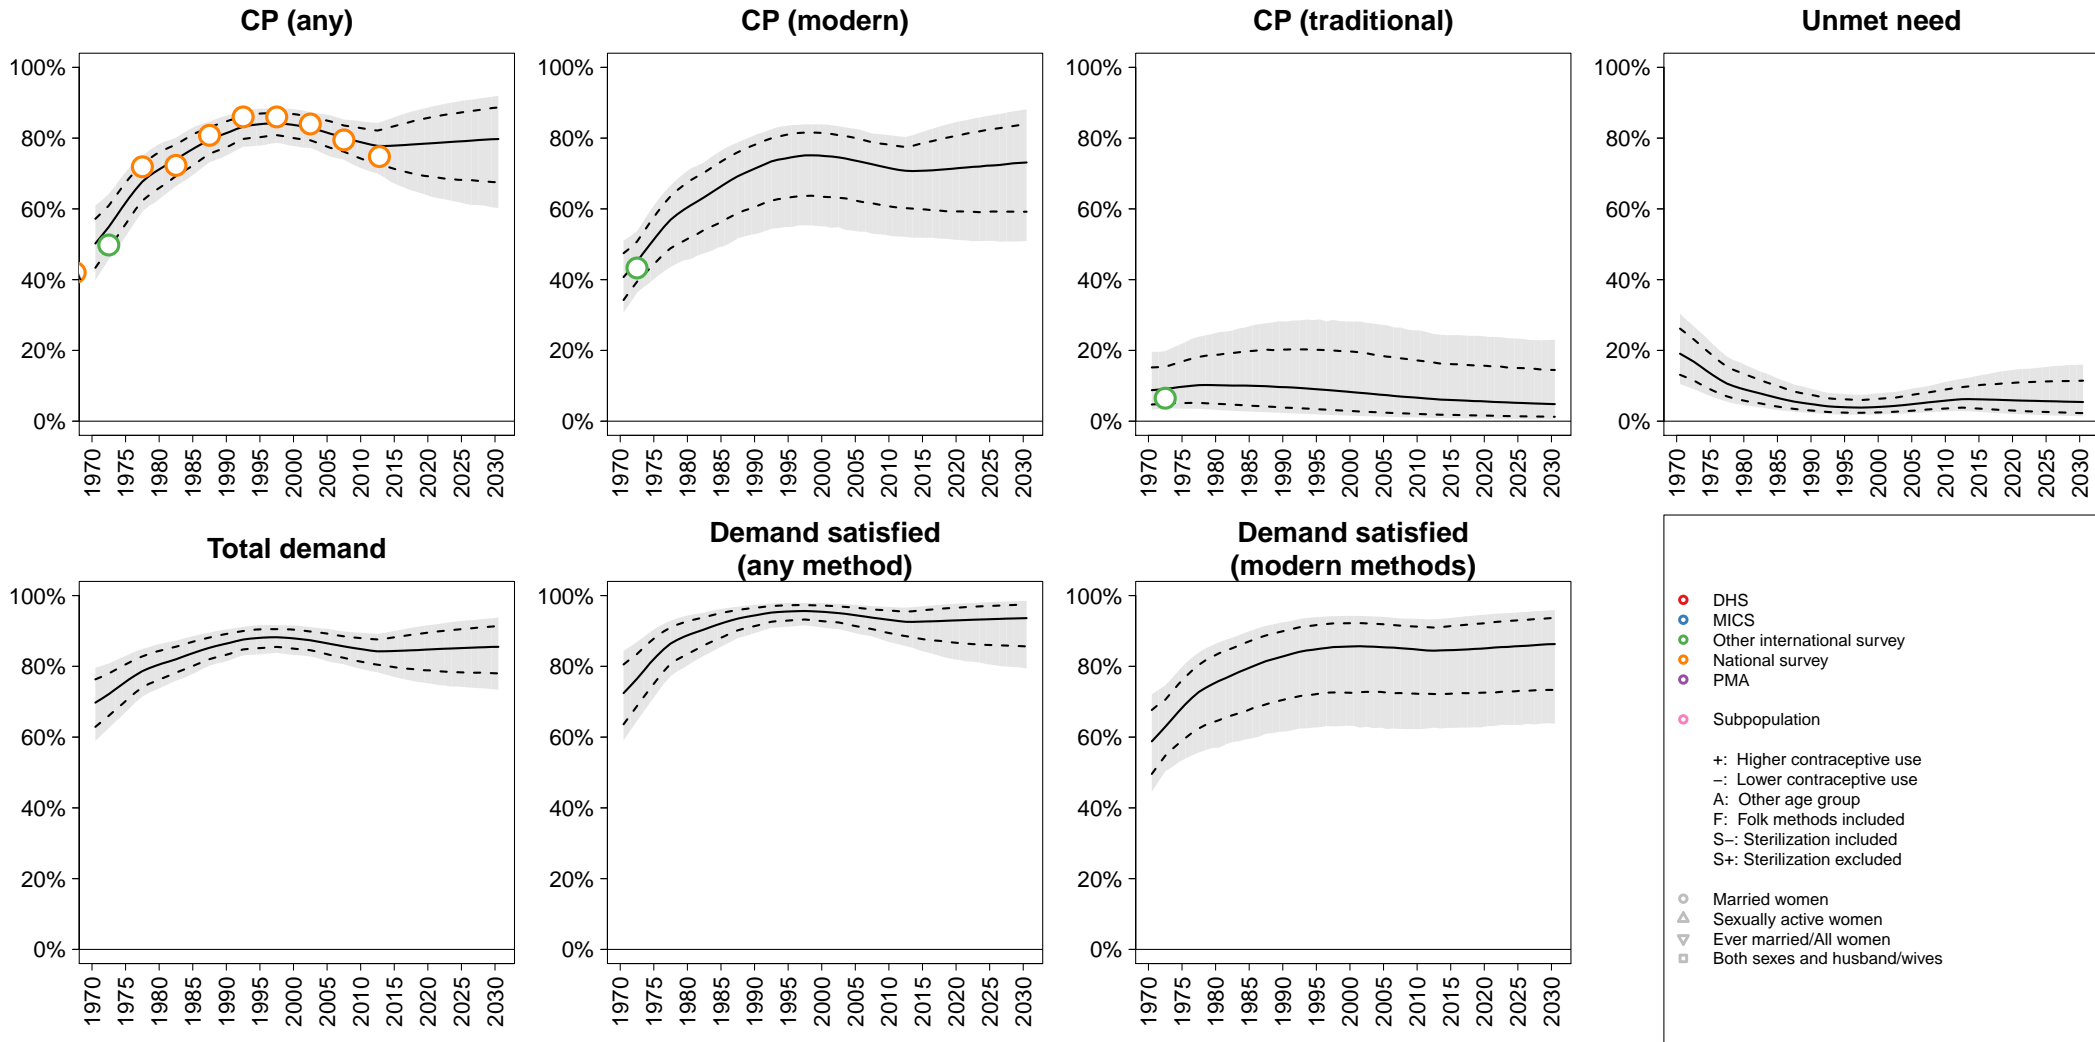

Colombia (South America) --- Married / In-Union

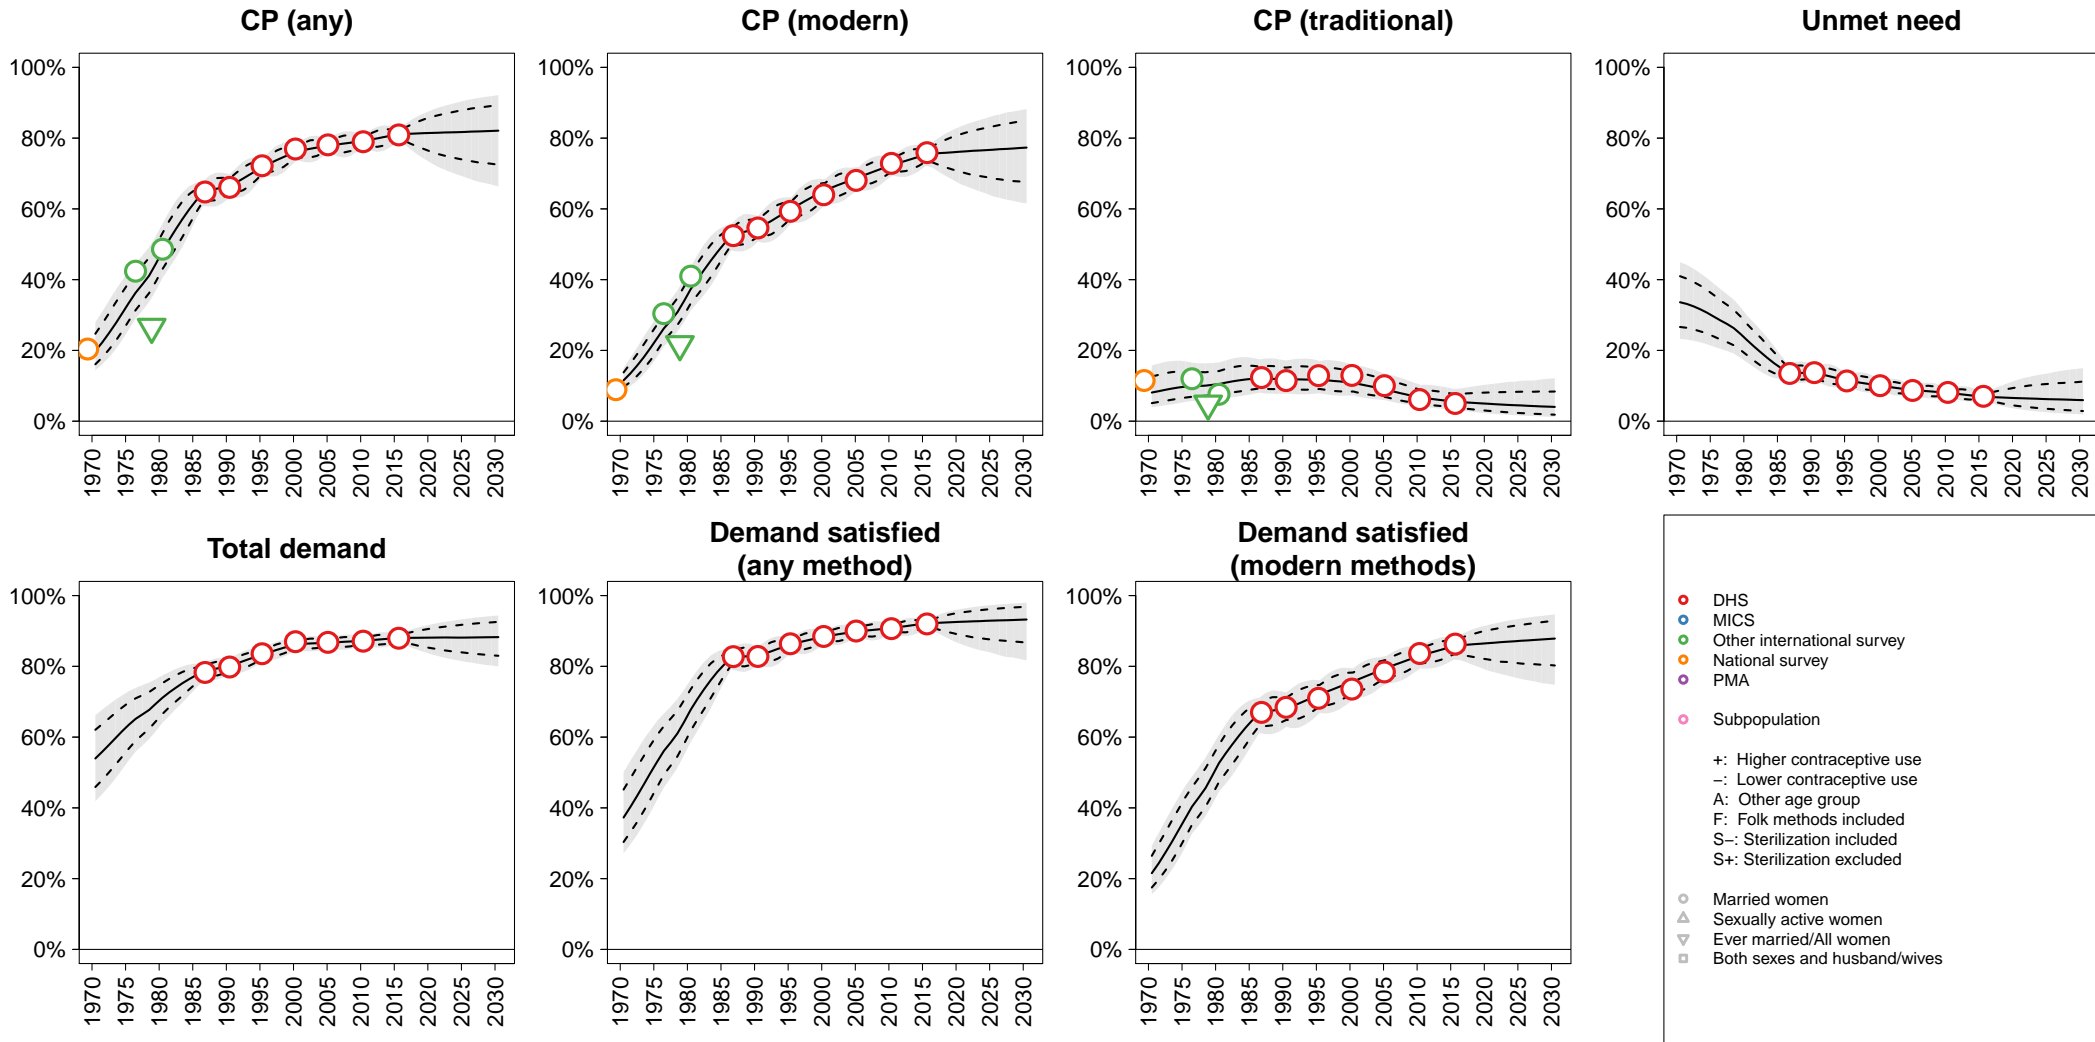

Comoros (Eastern Africa) --- Married / In-Union

CP (any)

CP (modern)

CP (traditional)

Unmet need

Total demand

Demand satisfied (any method)

Demand satisfied (modern methods)

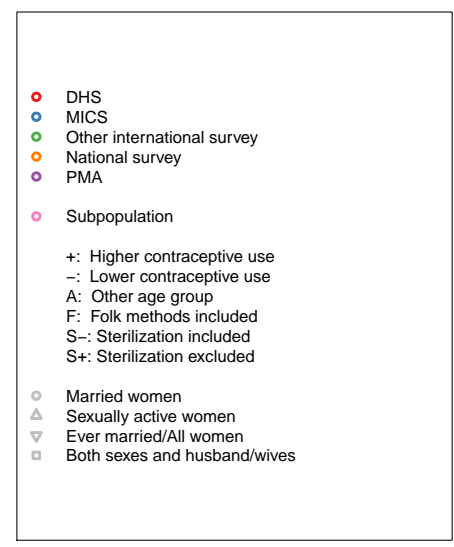

Congo (Middle Africa) --- Married / In-Union

CP (any)

CP (modern)

CP (traditional)

Unmet need

Total demand

Demand satisfied (any method)

Demand satisfied (modern methods)

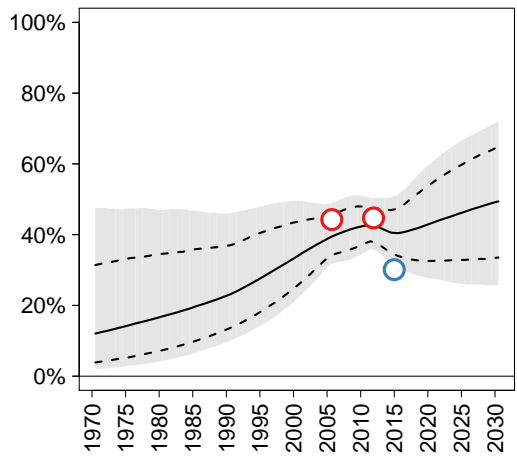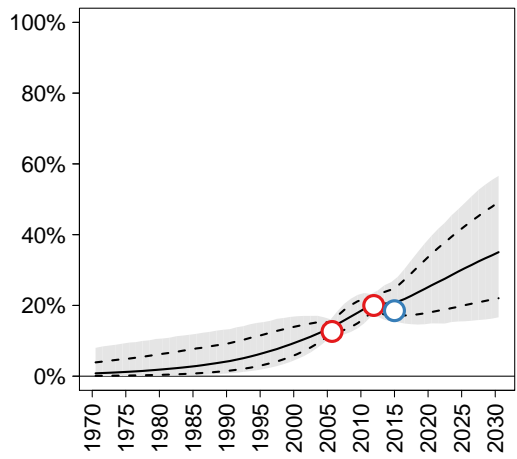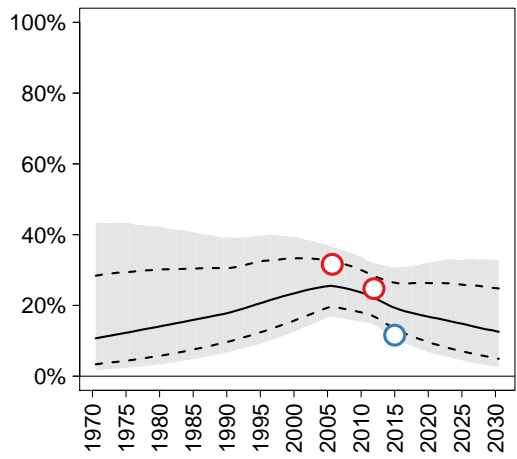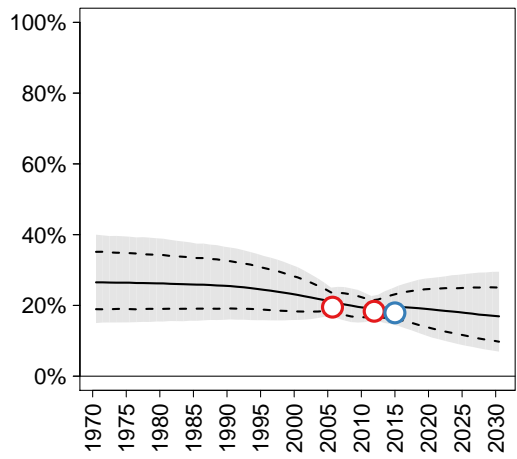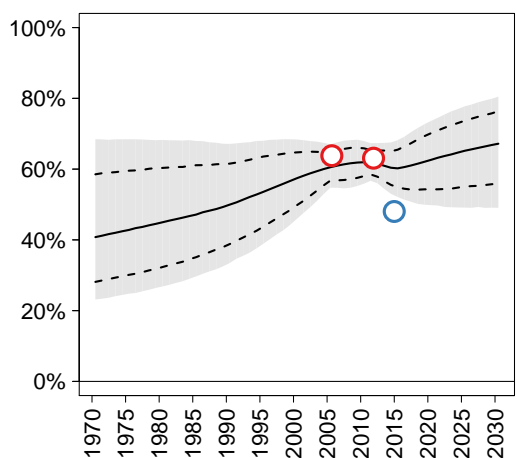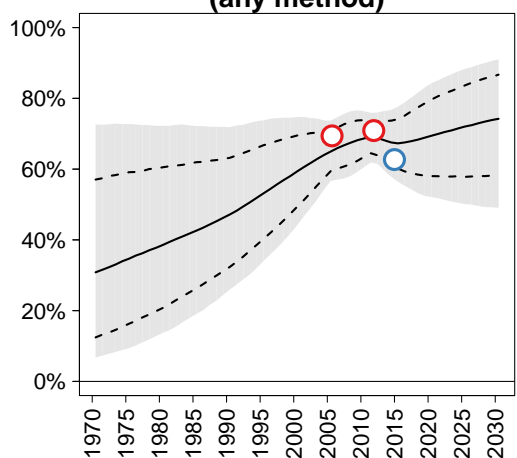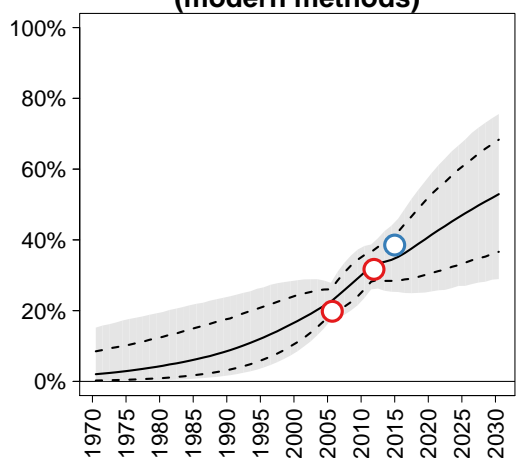

Costa Rica (Central America) --- Married / In-Union

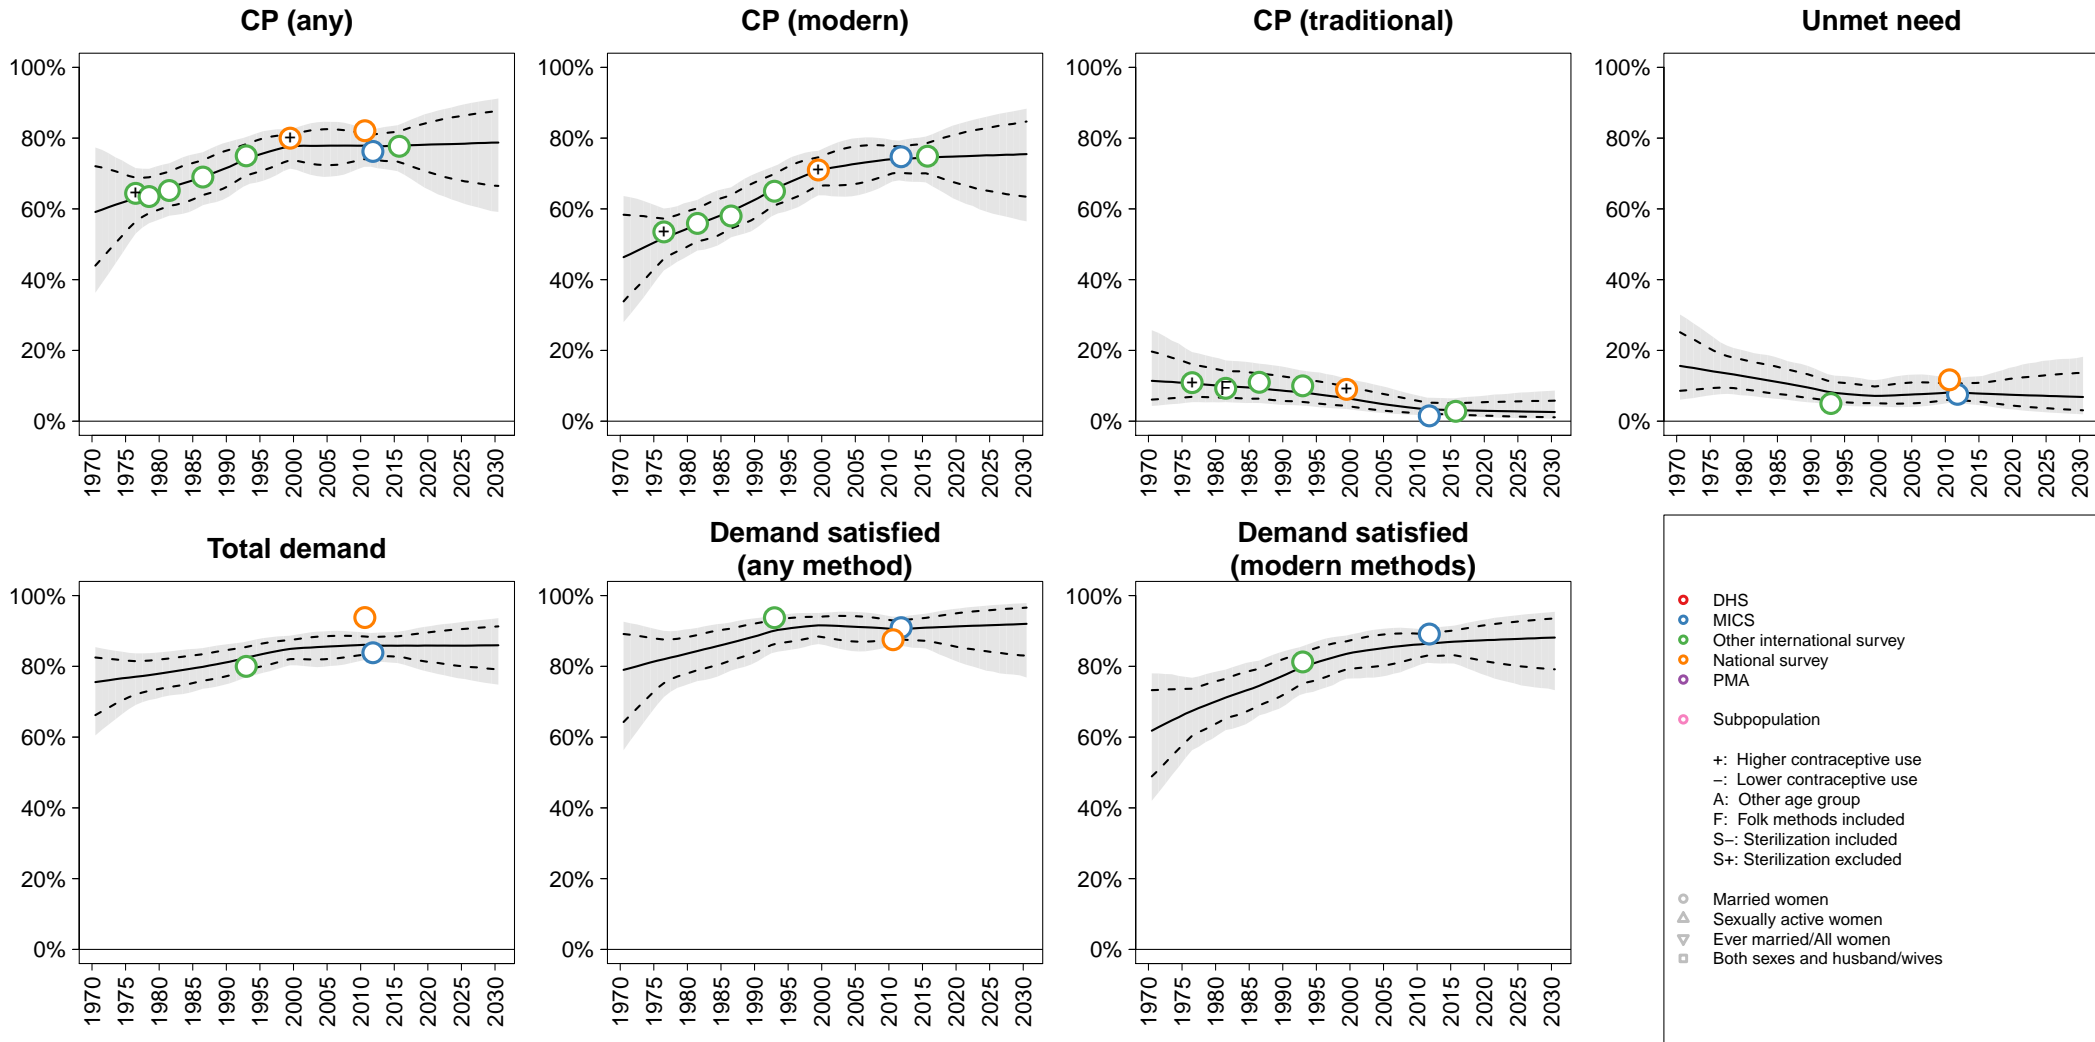

Côte d'Ivoire (Western Africa) --- Married / In-Union

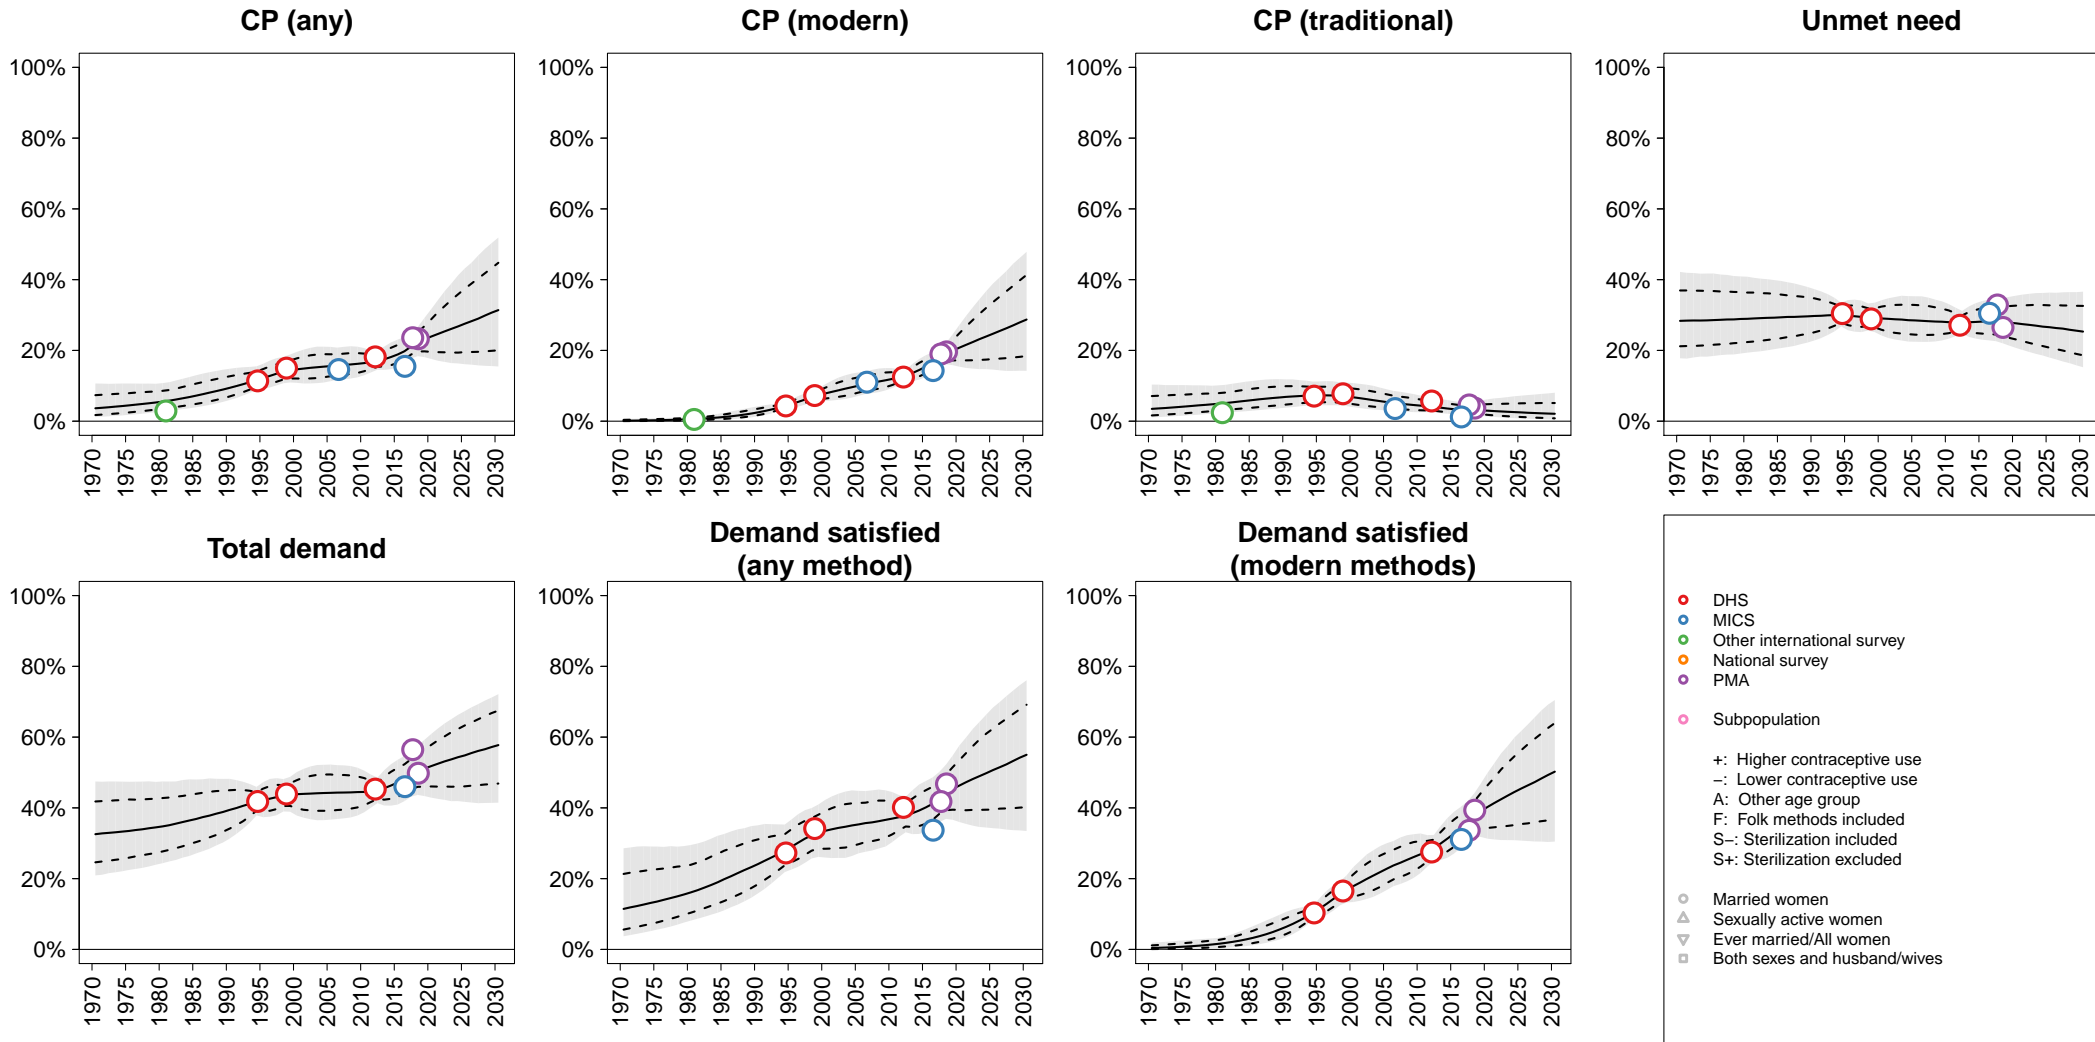

Croatia (Southern Europe) --- Married / In-Union

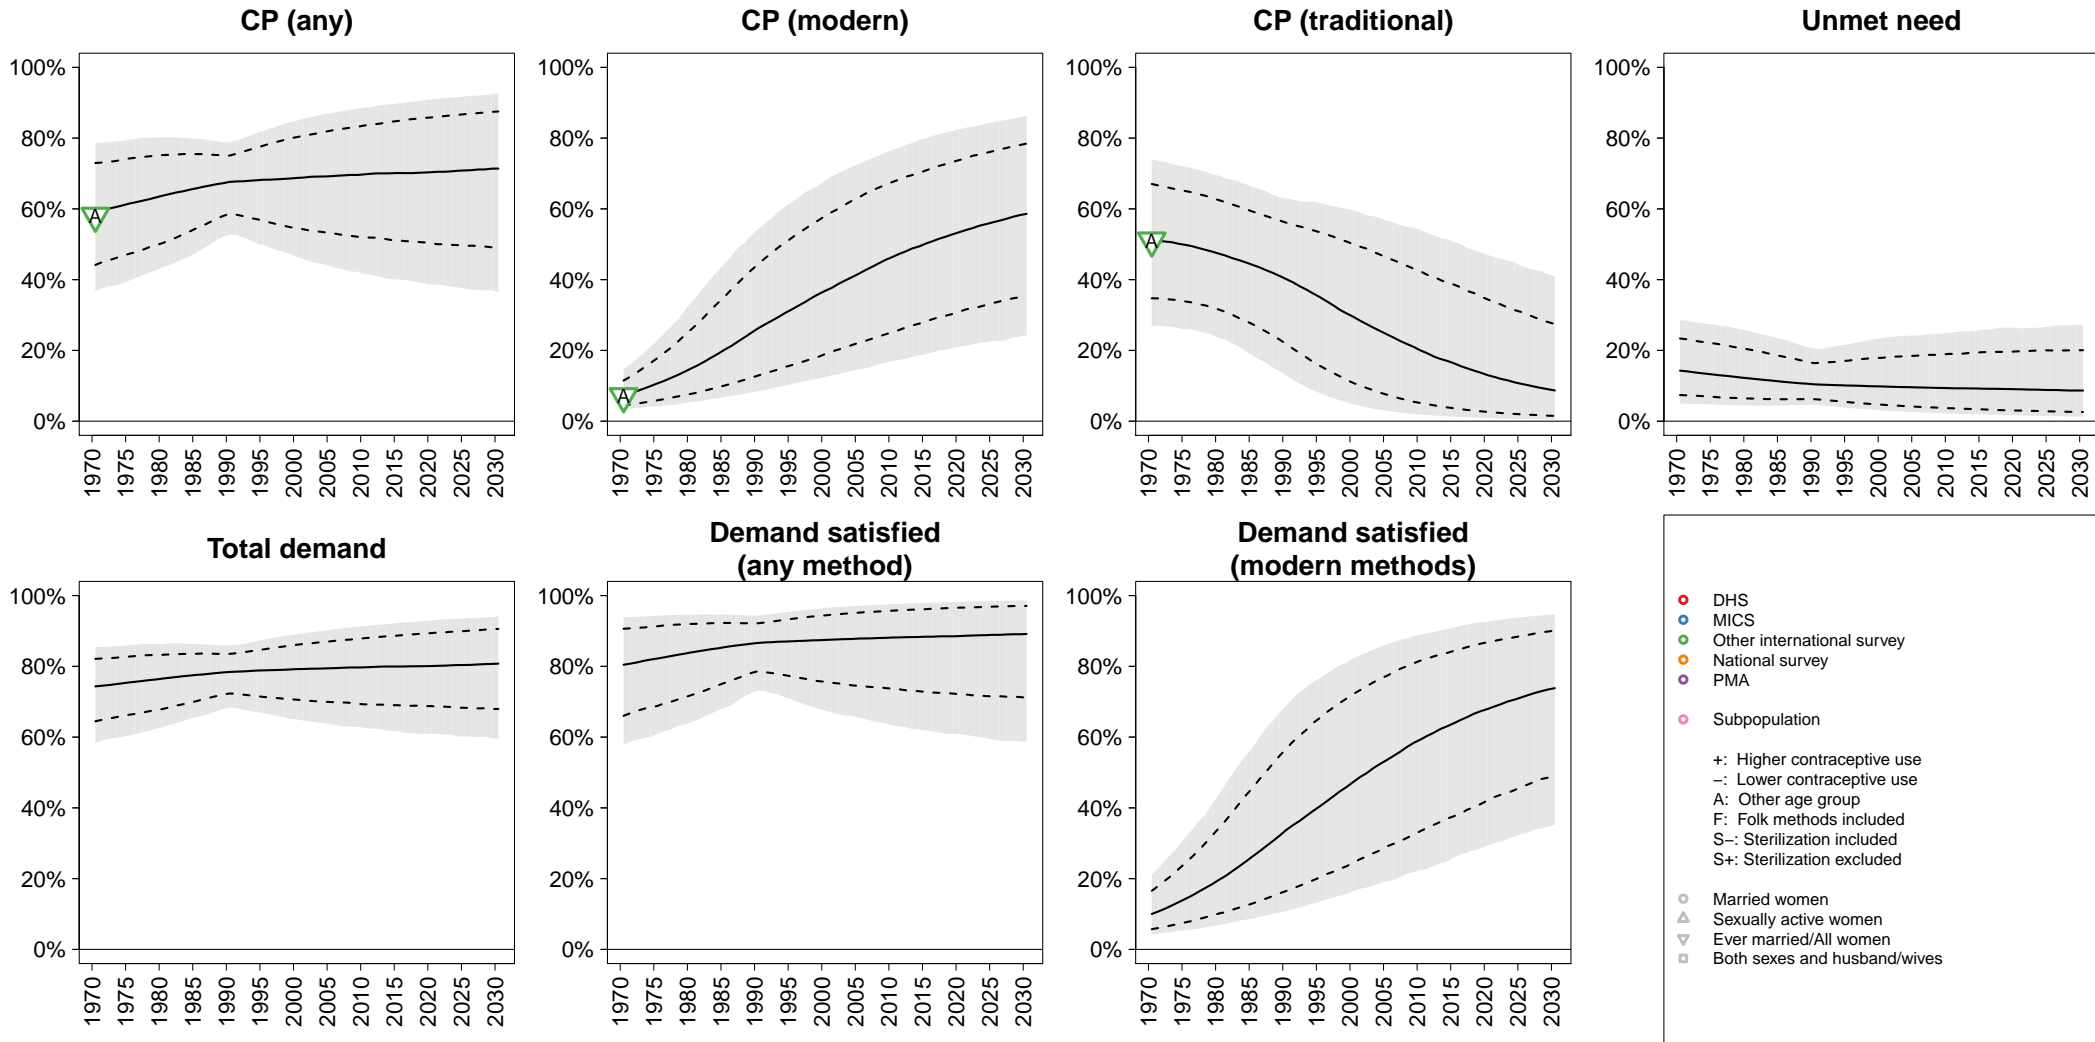



Cuba (Caribbean) --- Married / In-Union

CP (any)

CP (modern)

CP (traditional)

Unmet need

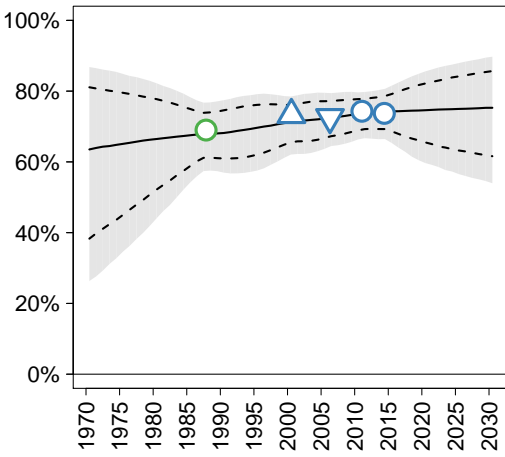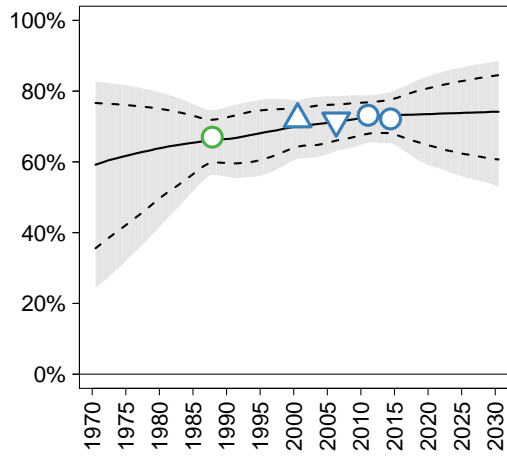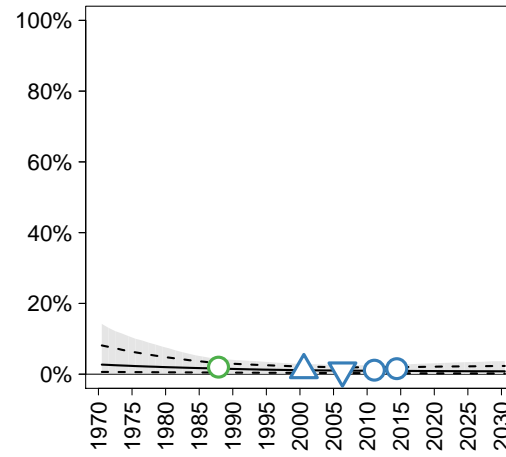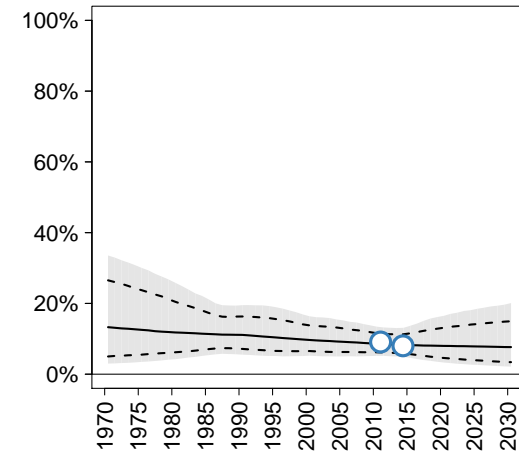

Total demand

Demand satisfied (any method)

Demand satisfied (modern methods)

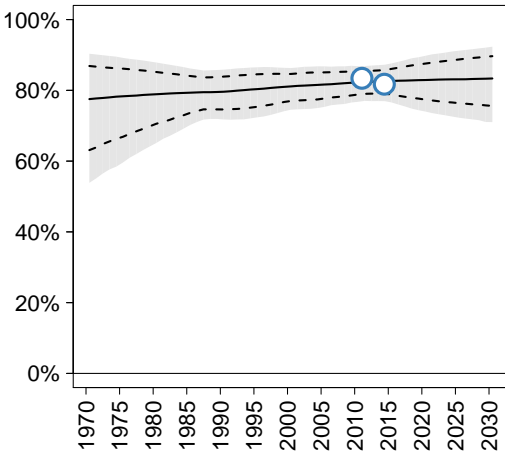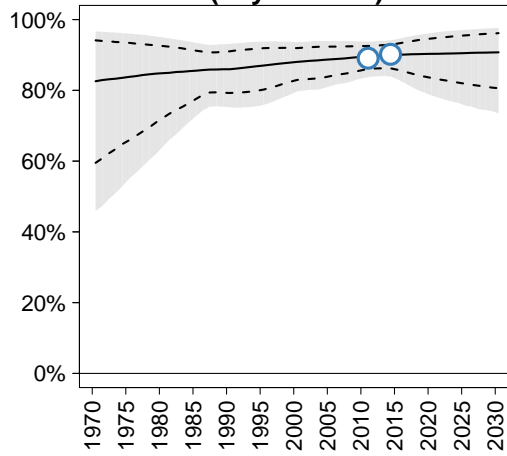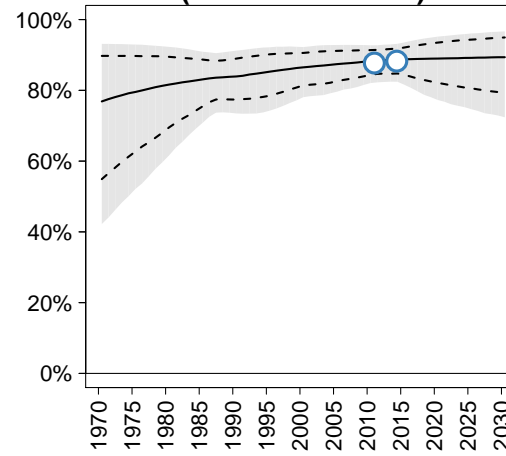

Czechia (Eastern Europe) --- Married / In-Union

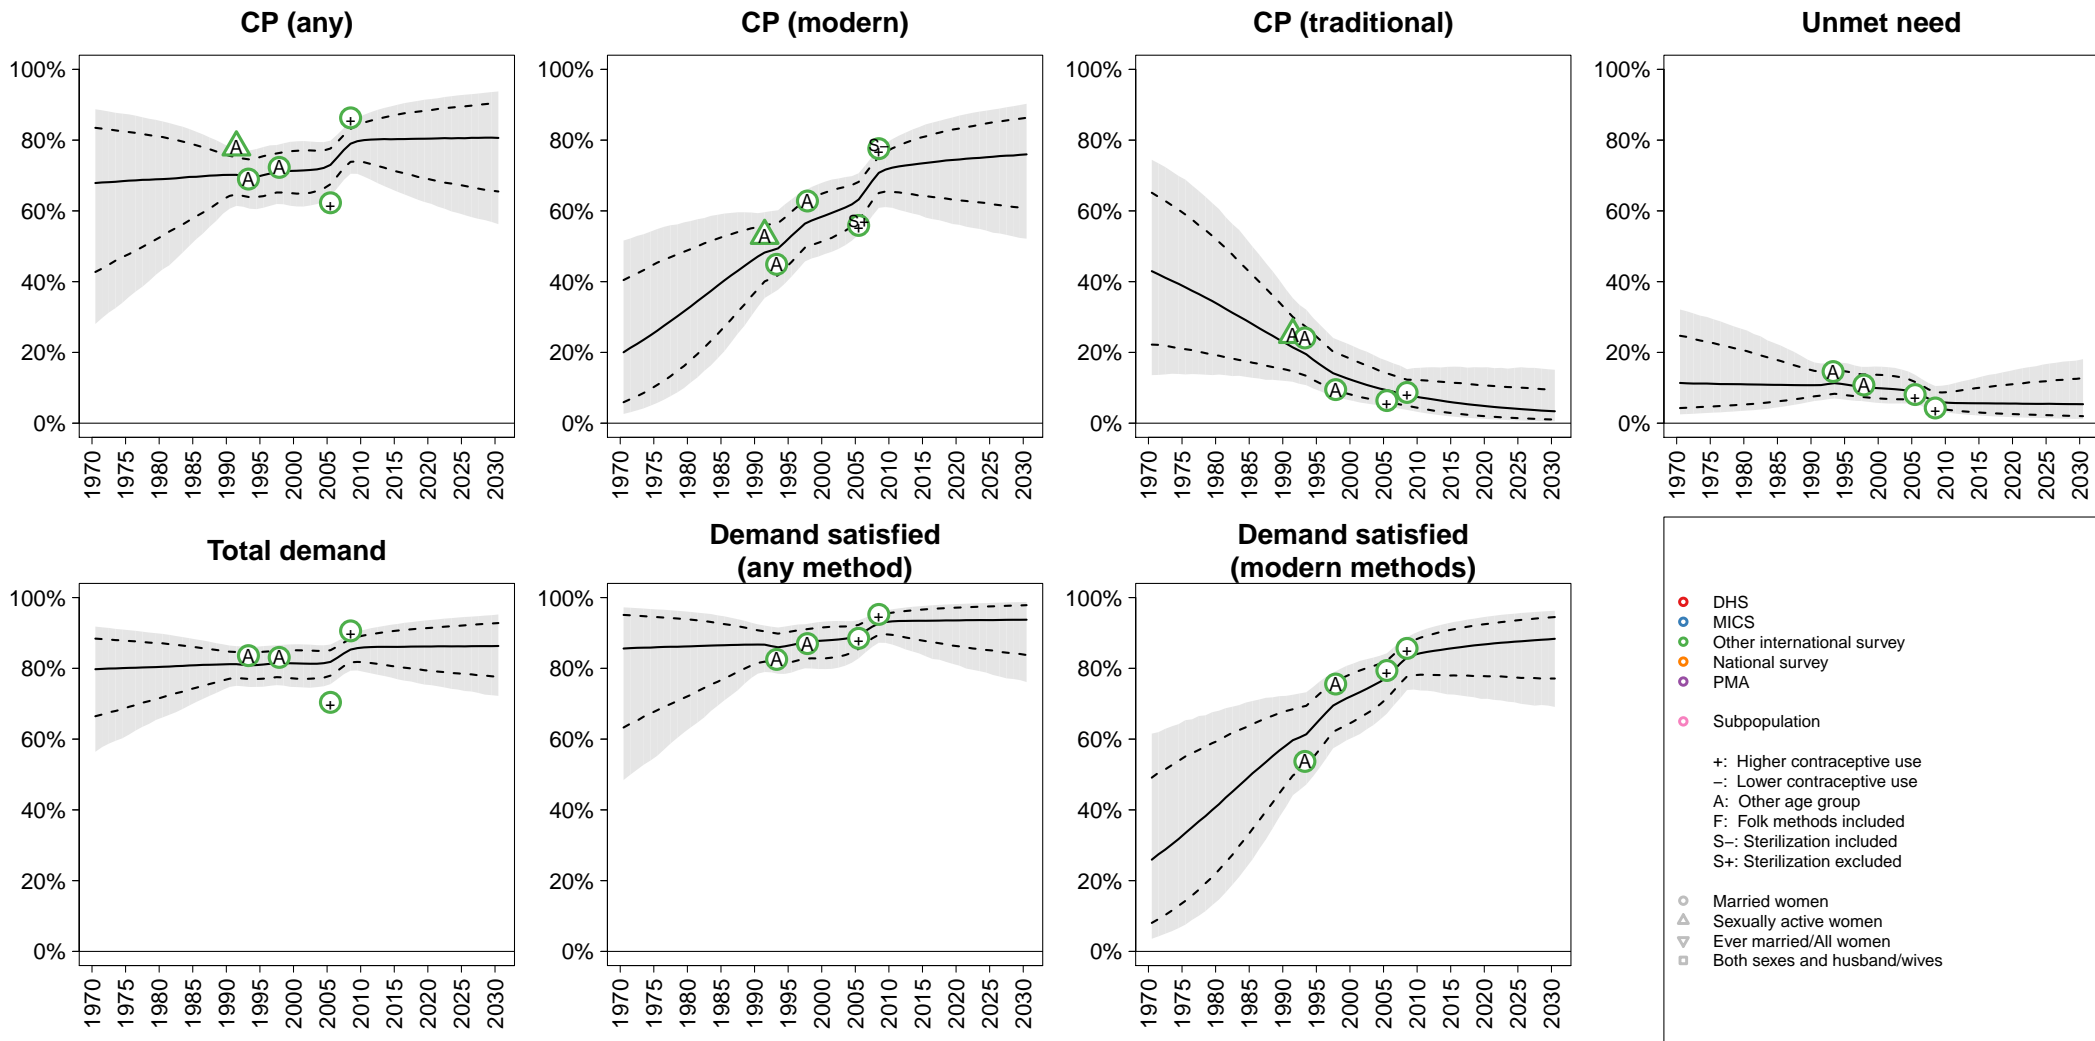

Democratic People's Rep. of Korea (Eastern Asia) --- Married / In-Union

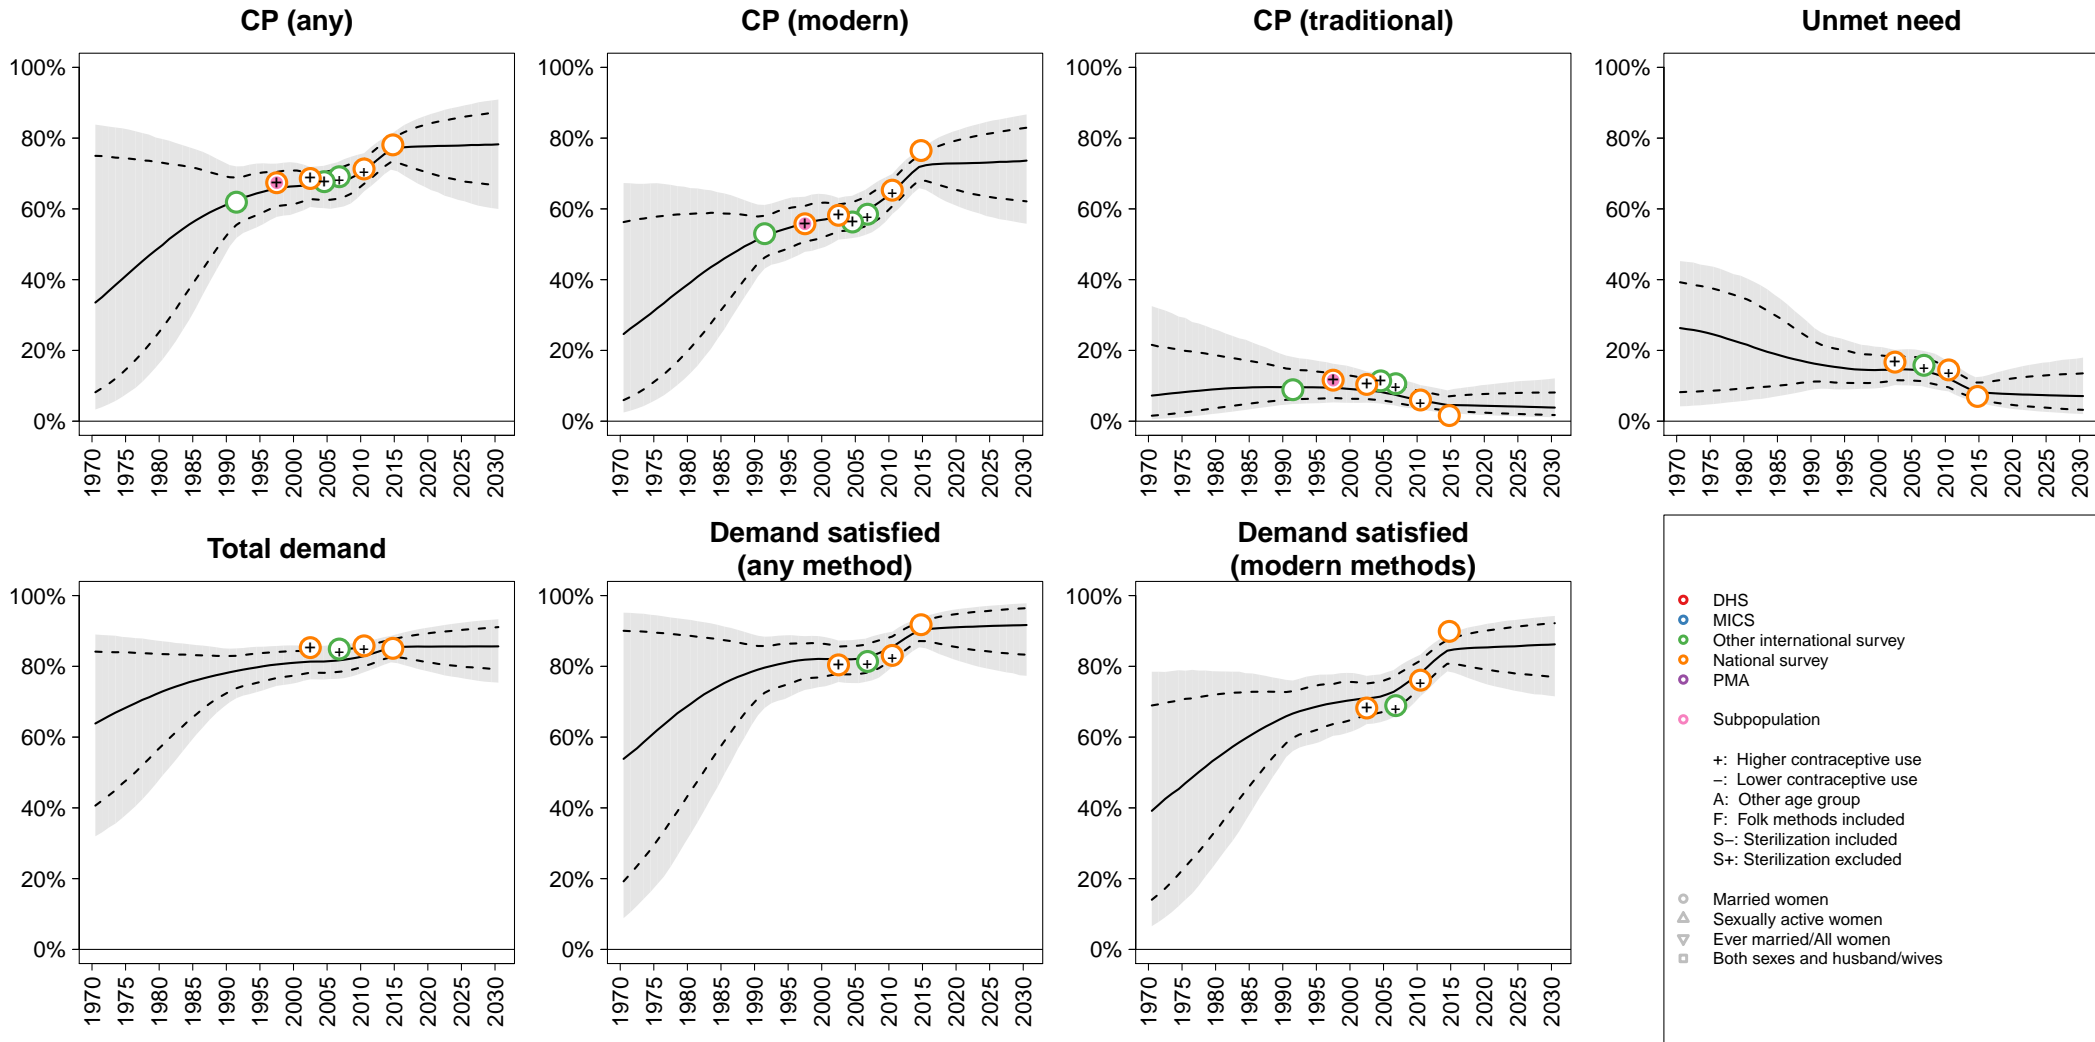

Democratic Rep. of the Congo (Middle Africa) --- Married / In-Union

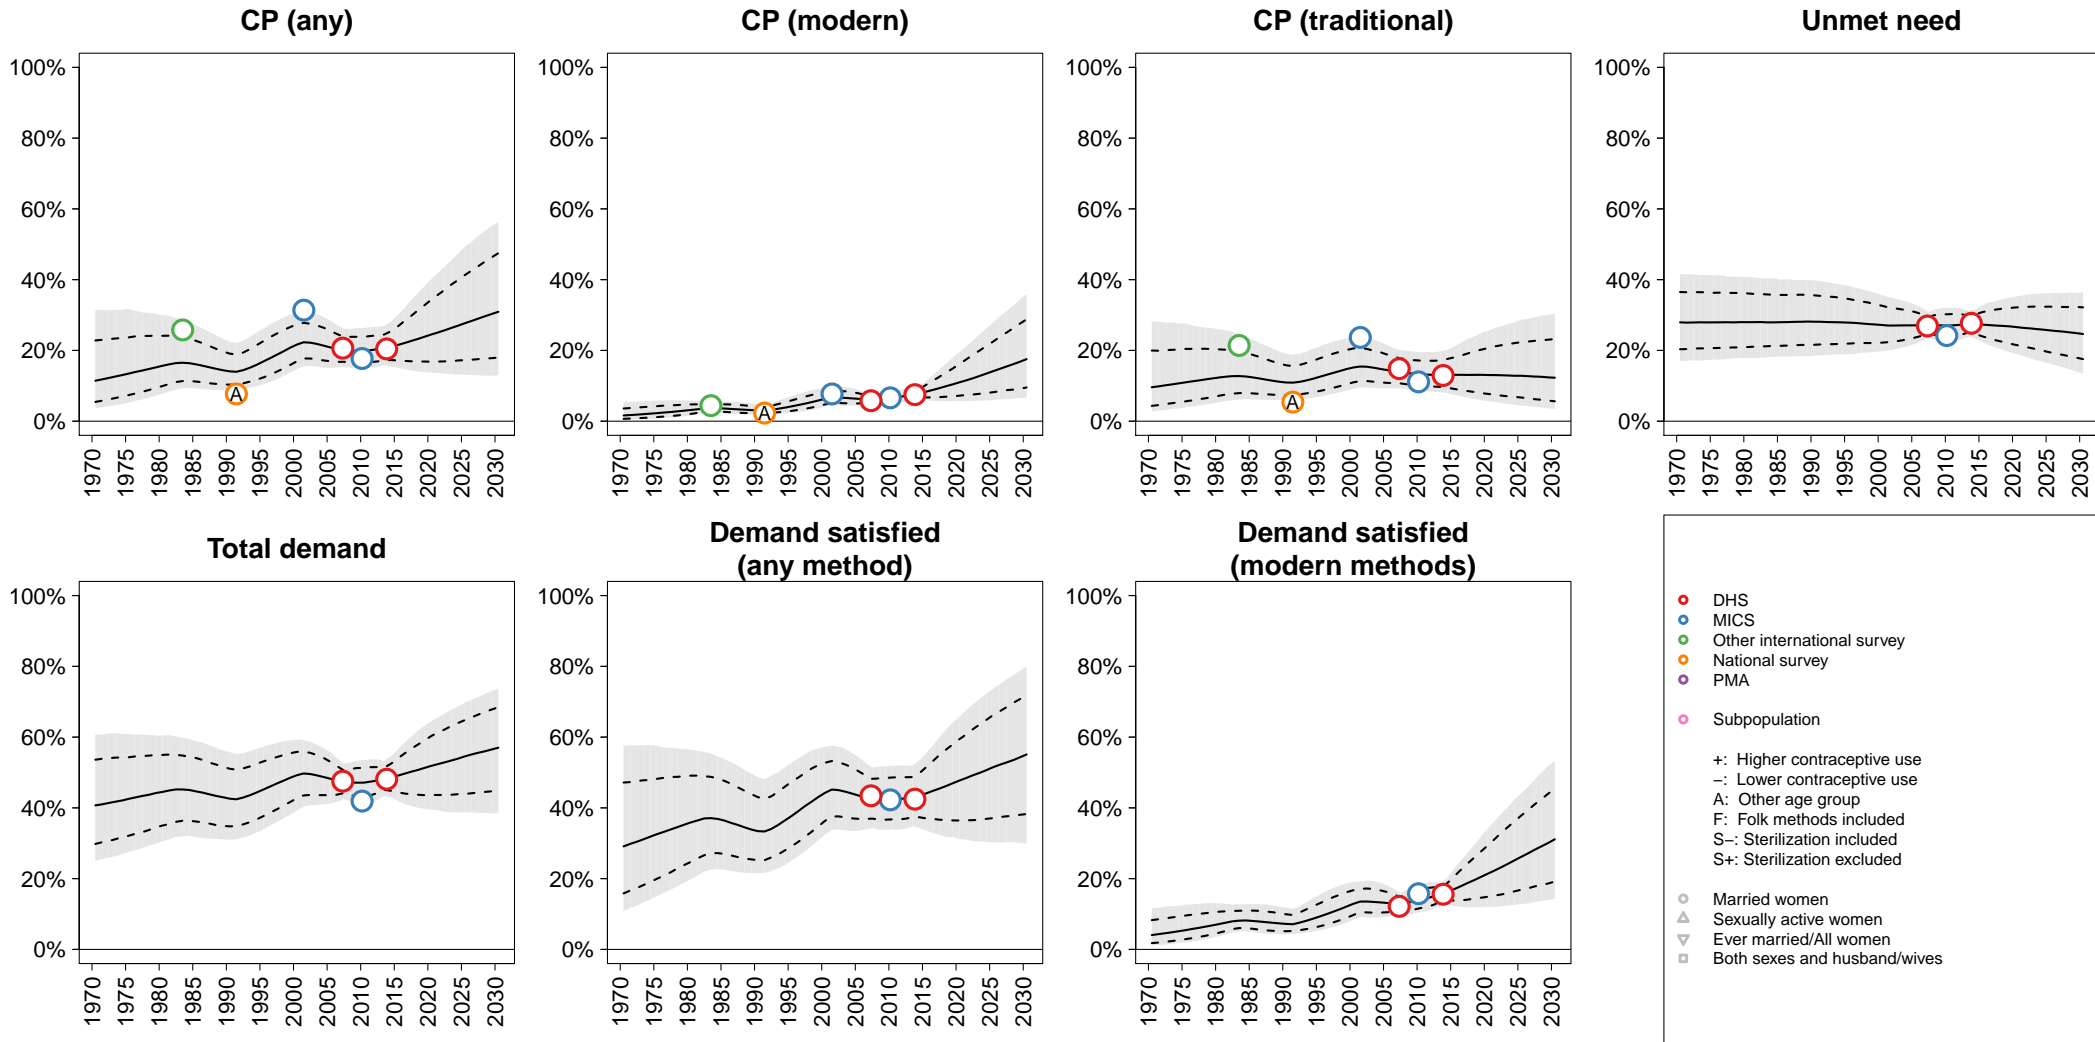

Democratic Republic of Timor-Leste (South-eastern Asia) --- Married / In-Union

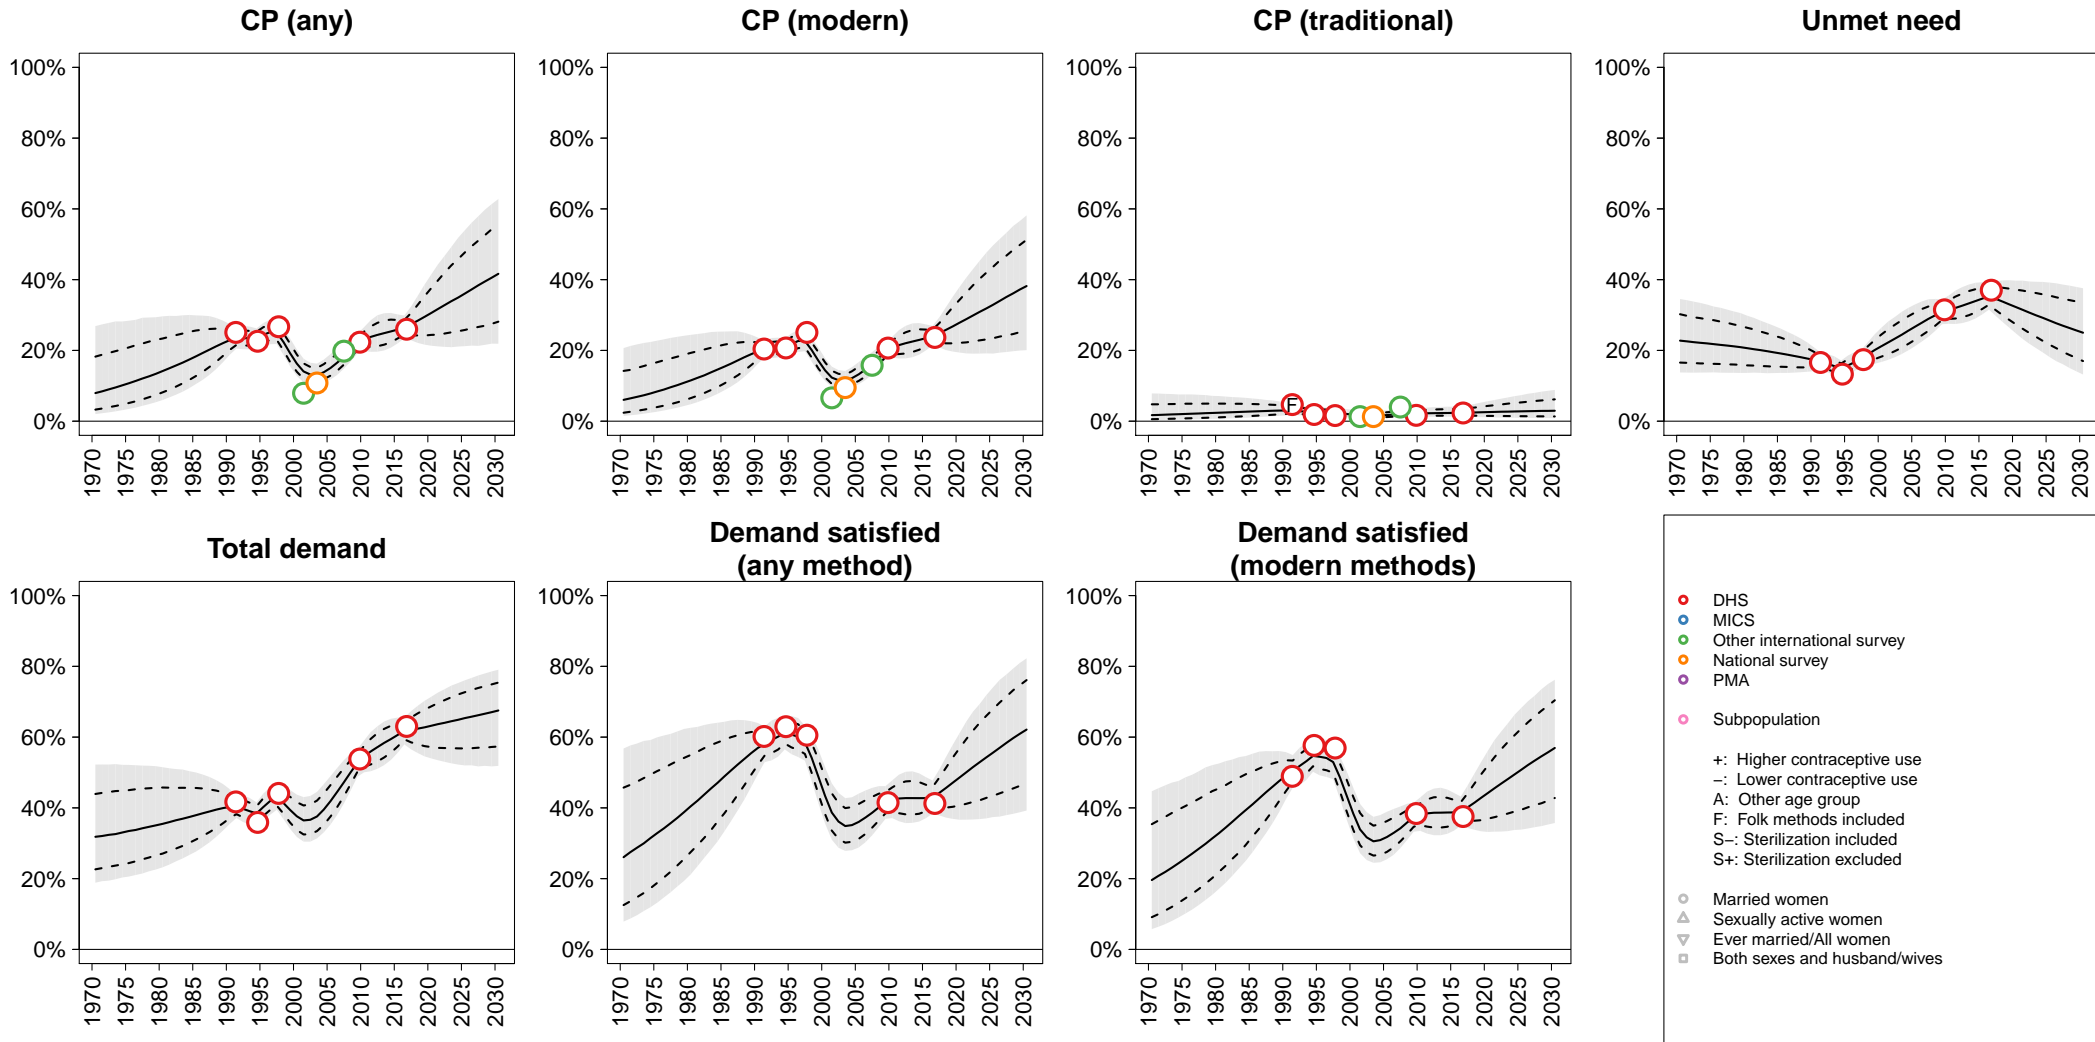

Denmark (Northern Europe) --- Married / In-Union

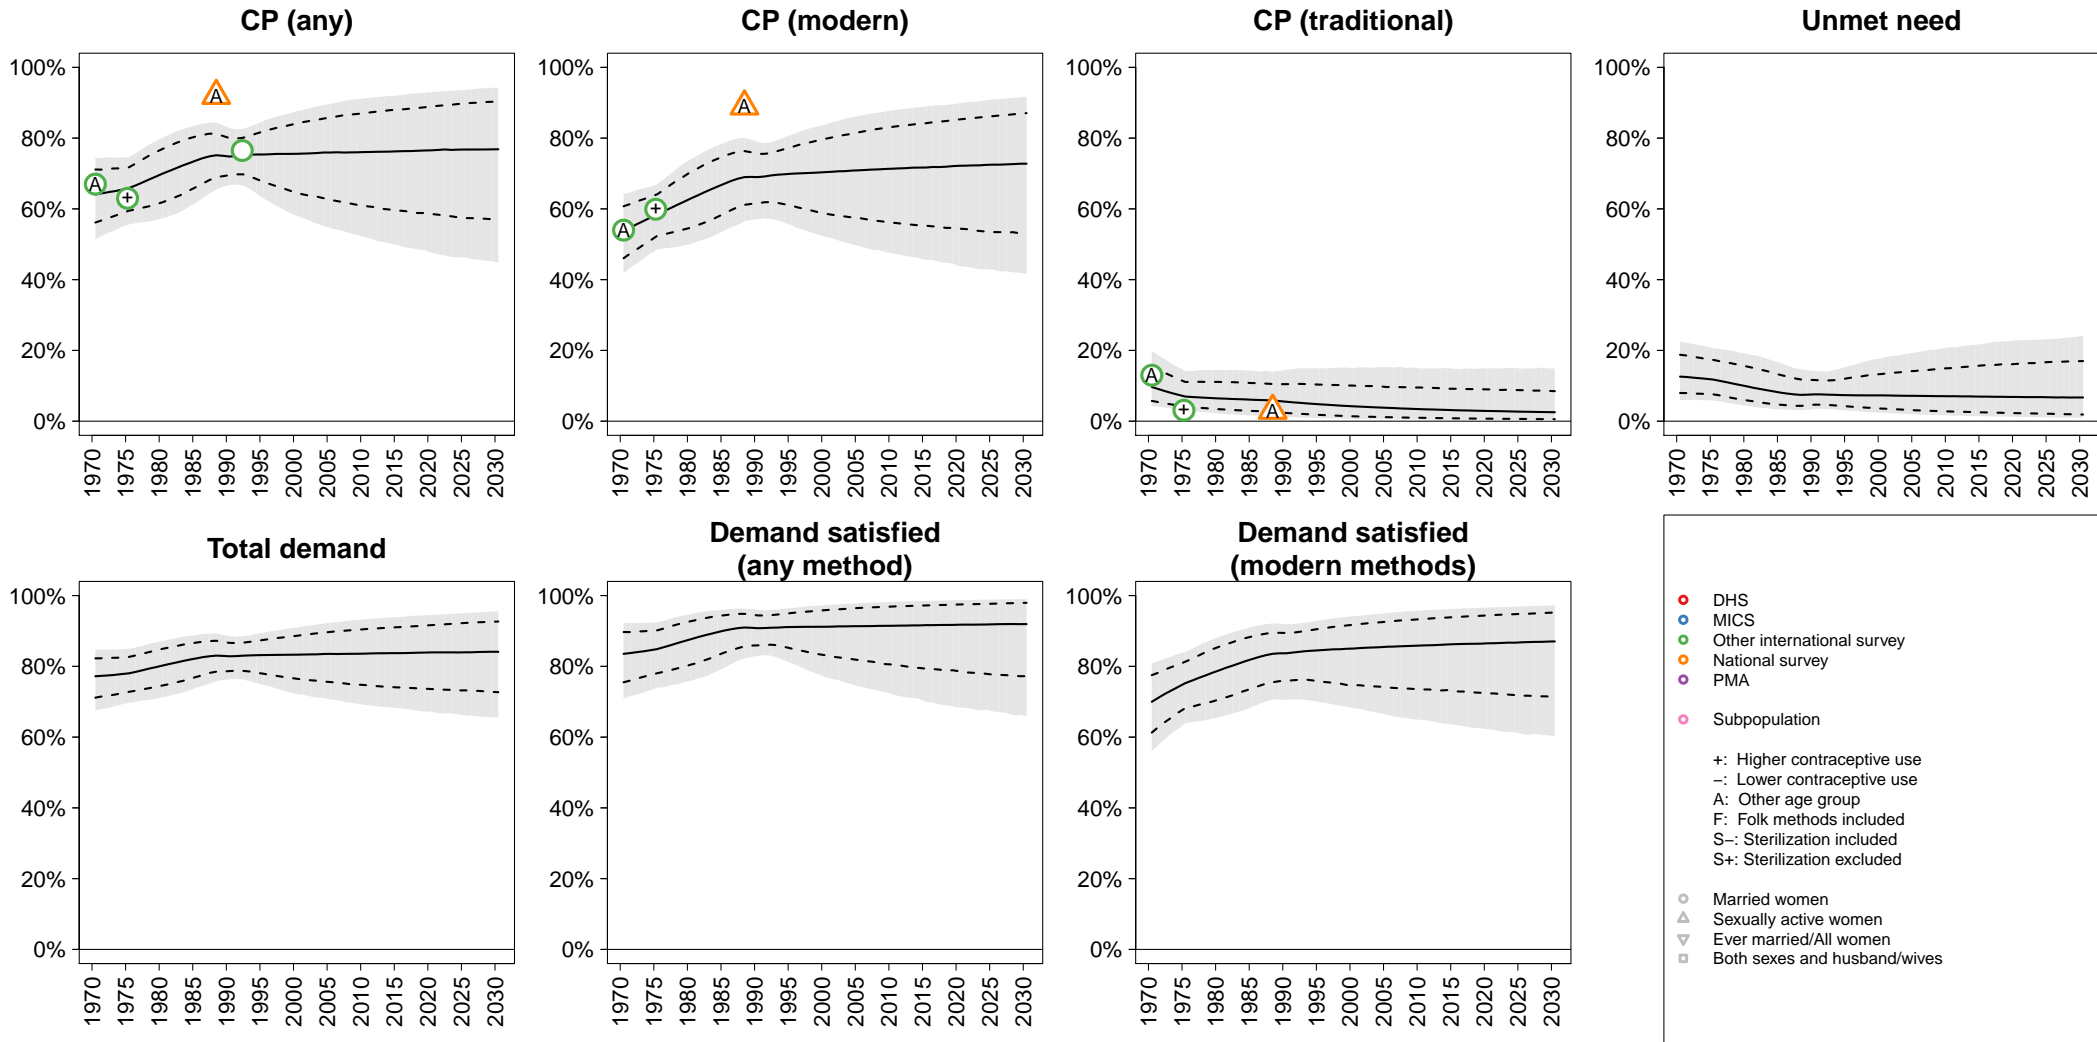

Djibouti (Eastern Africa) --- Married / In-Union

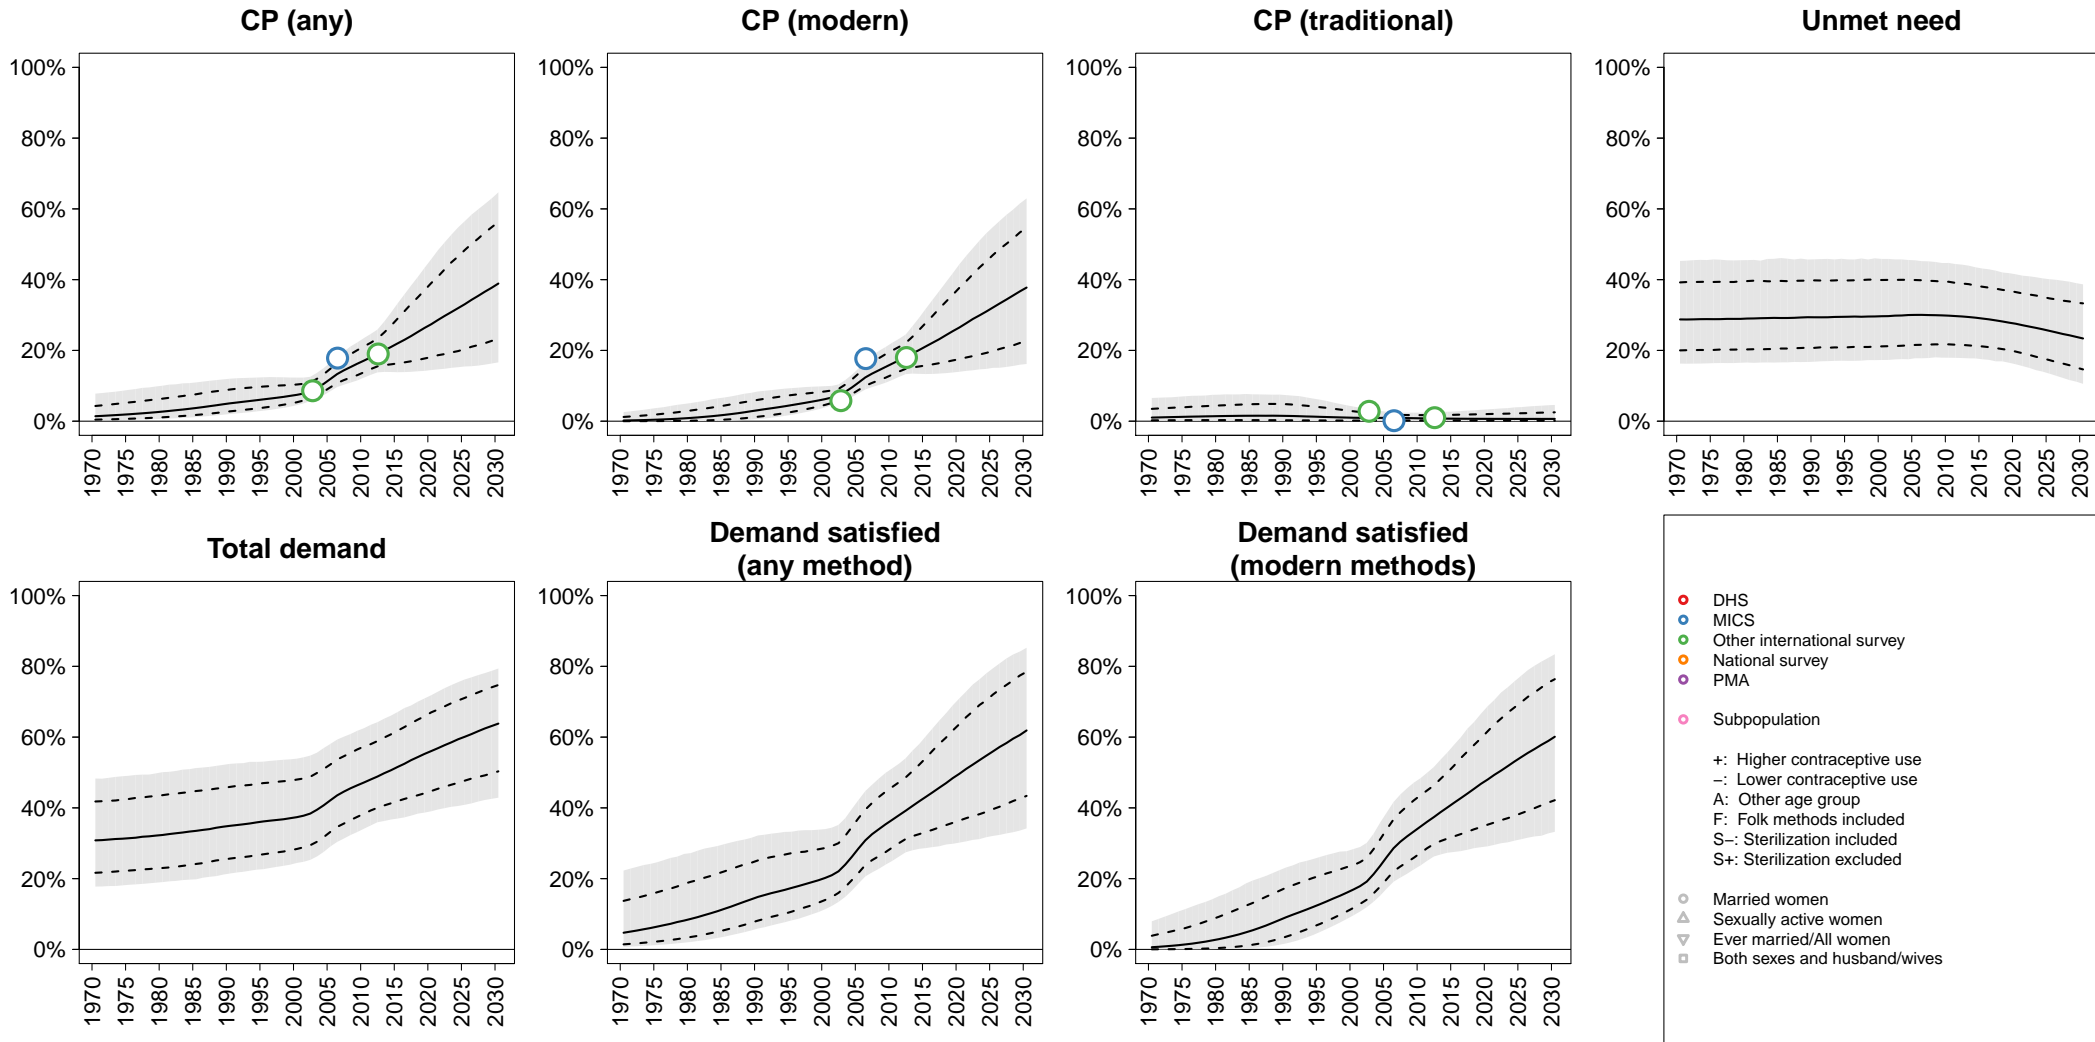

Dominican Republic (Caribbean) --- Married / In-Union

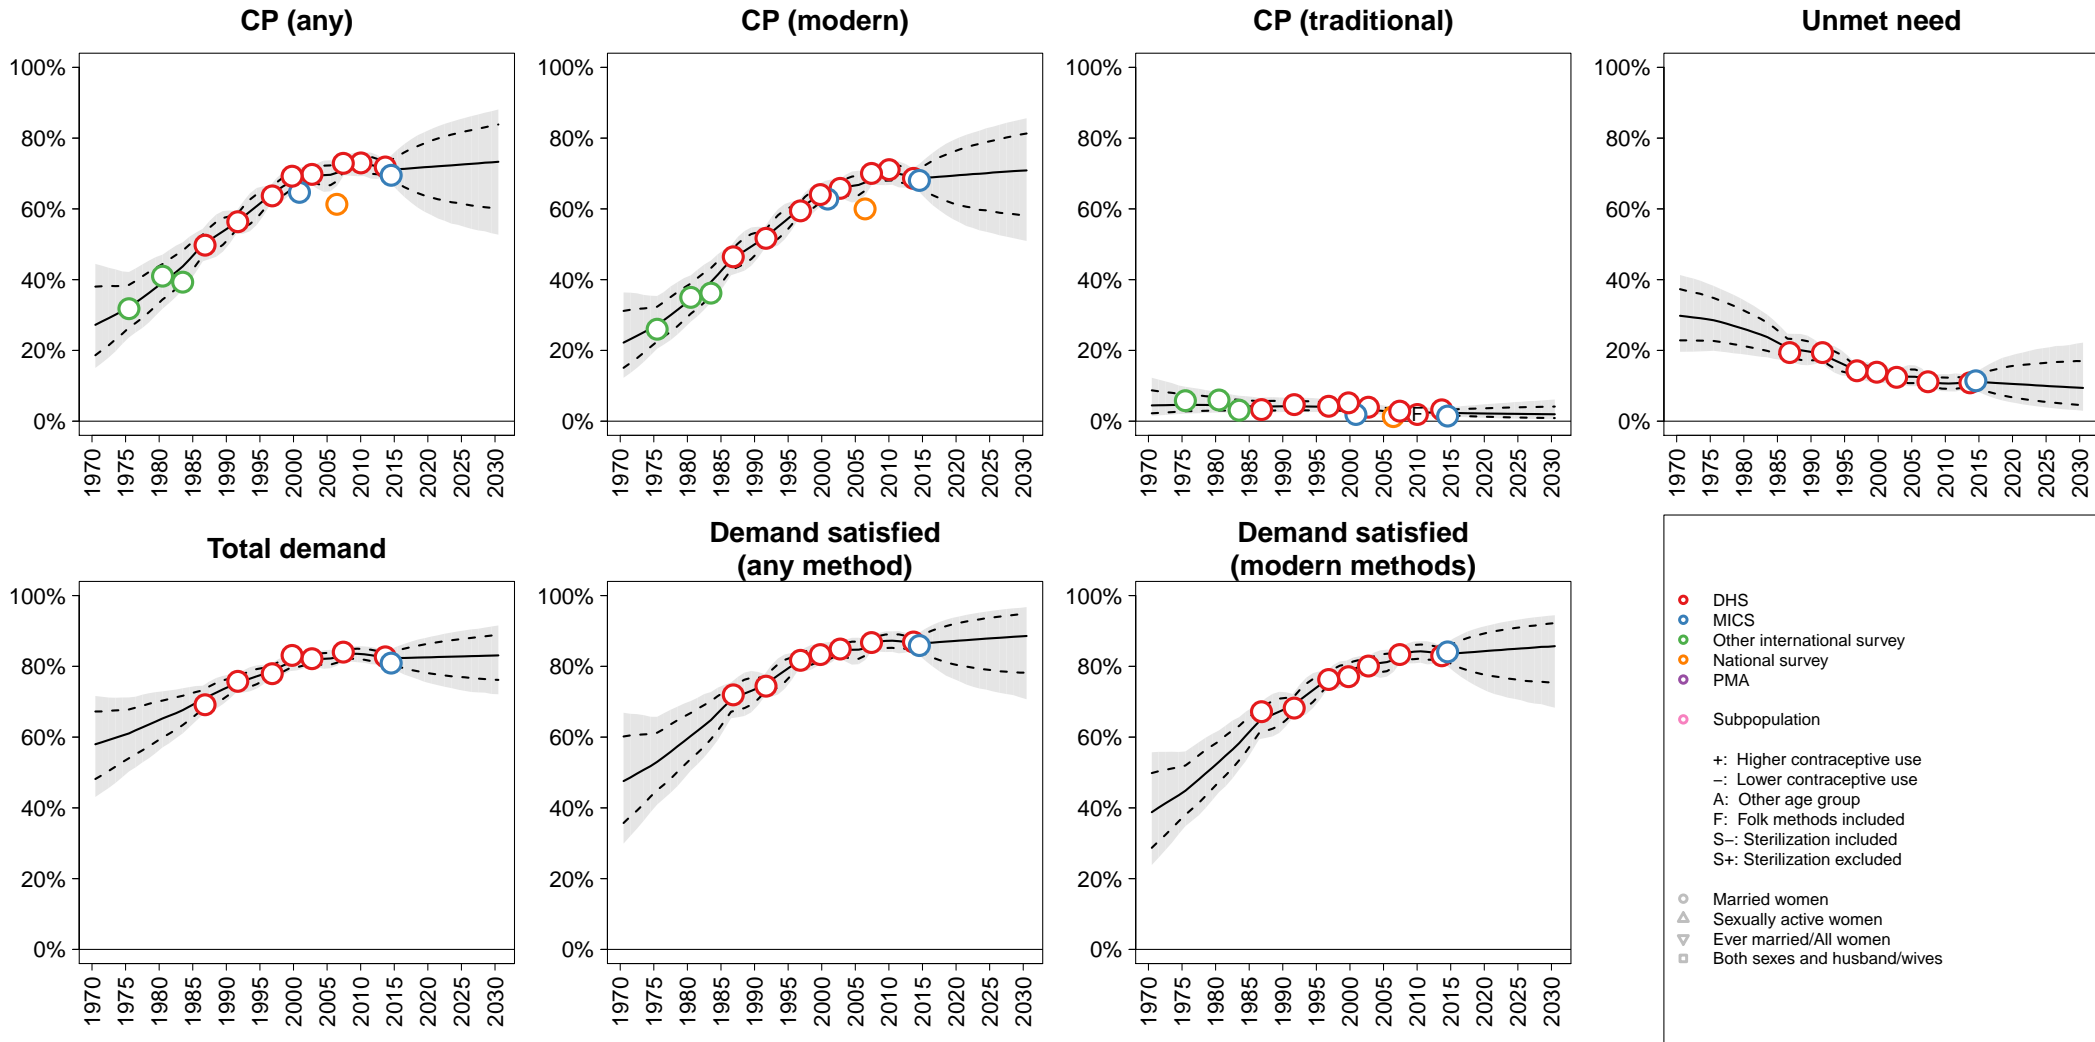



Ecuador (South America) --- Married / In-Union

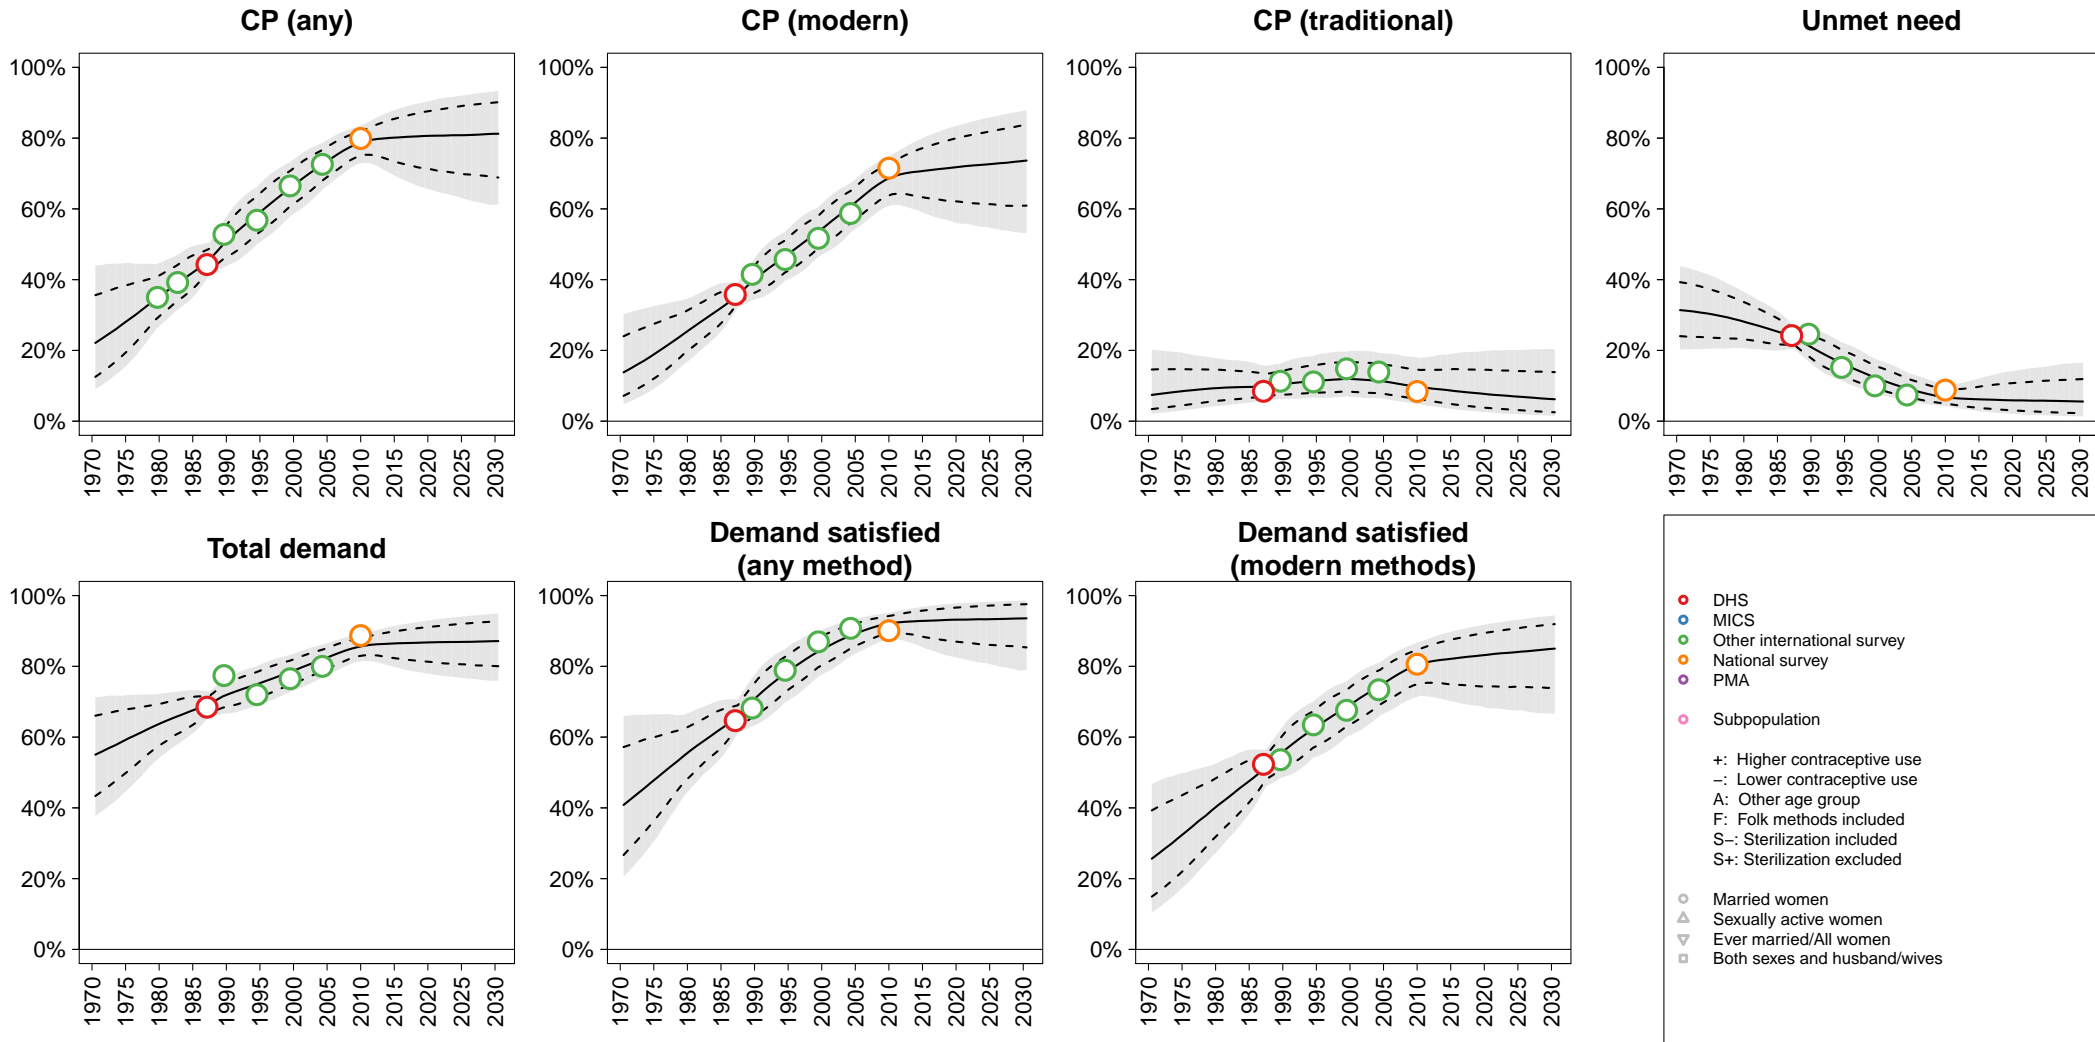

Egypt (Northern Africa) --- Married / In-Union

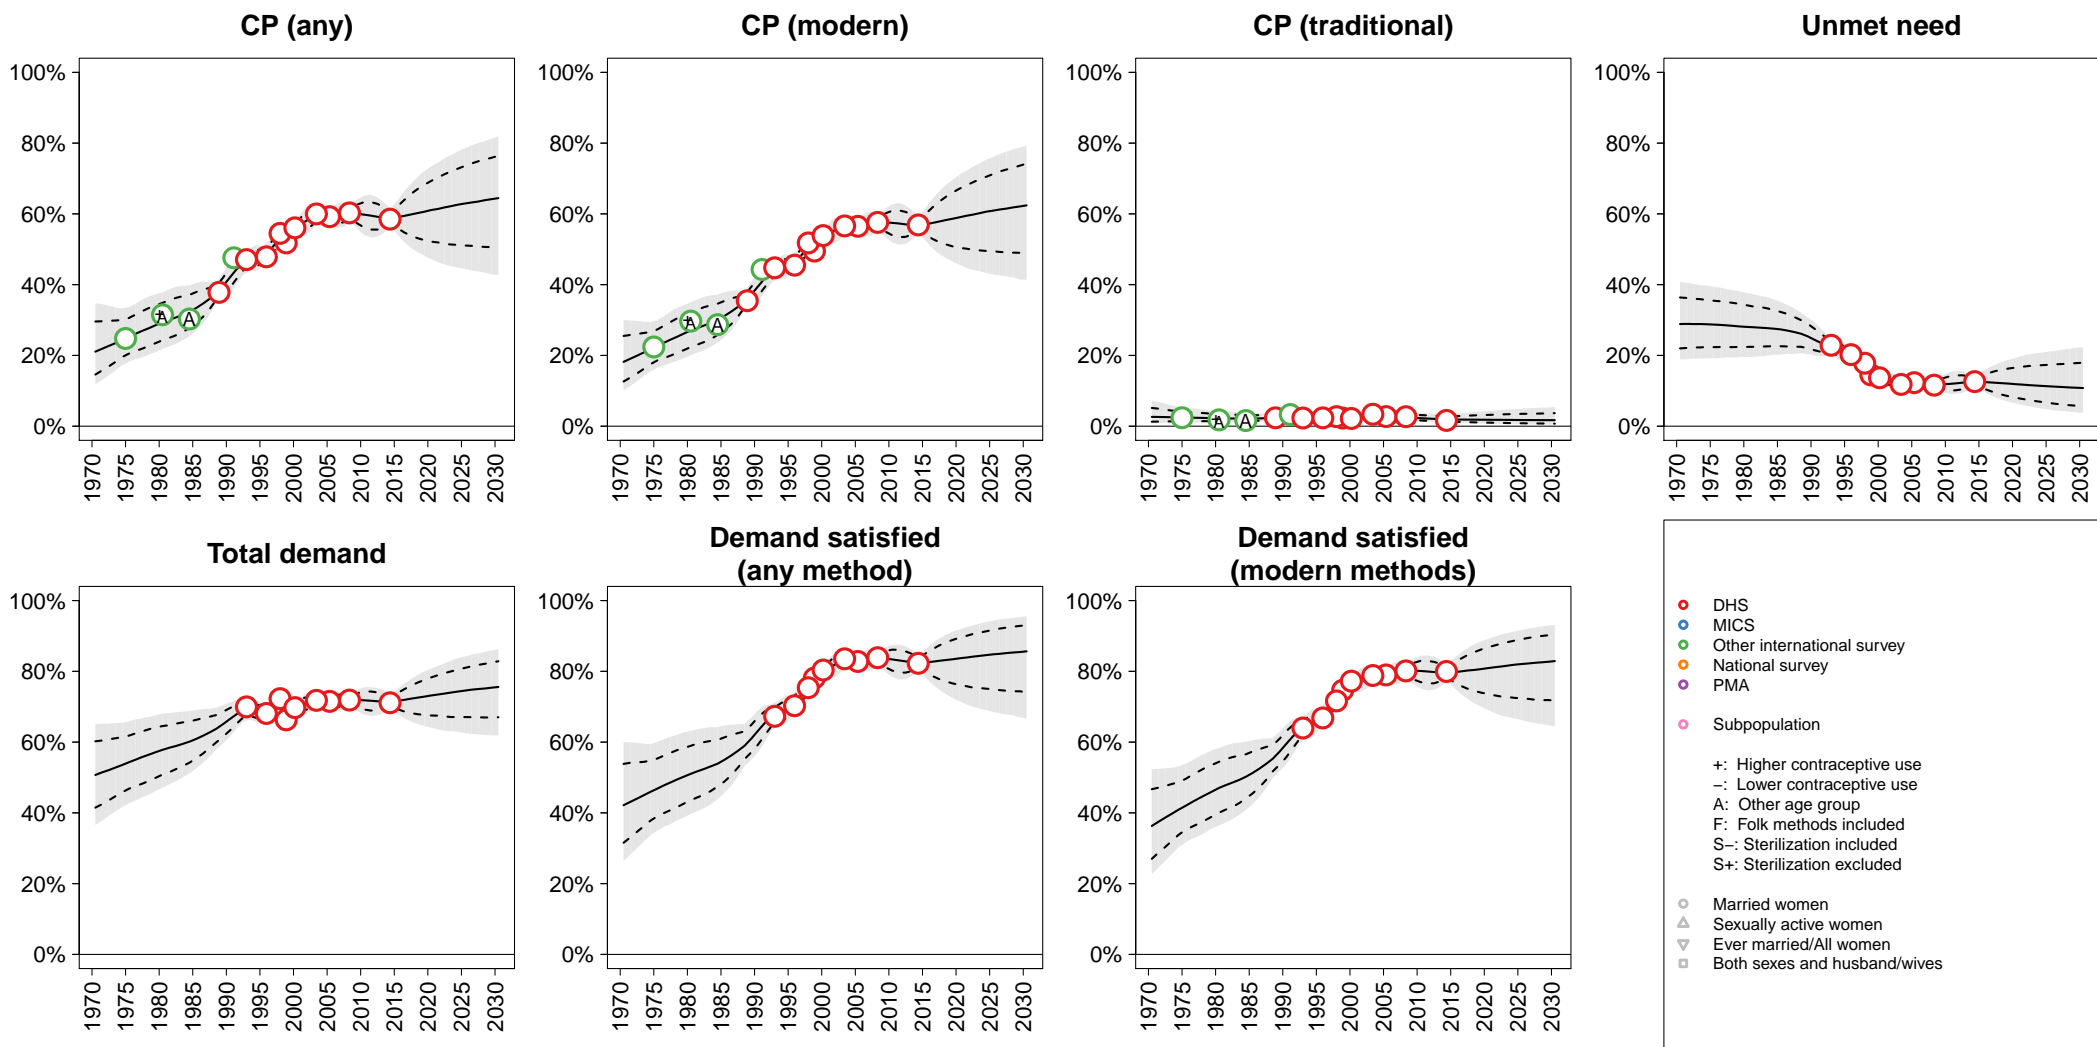

El Salvador (Central America) --- Married / In-Union

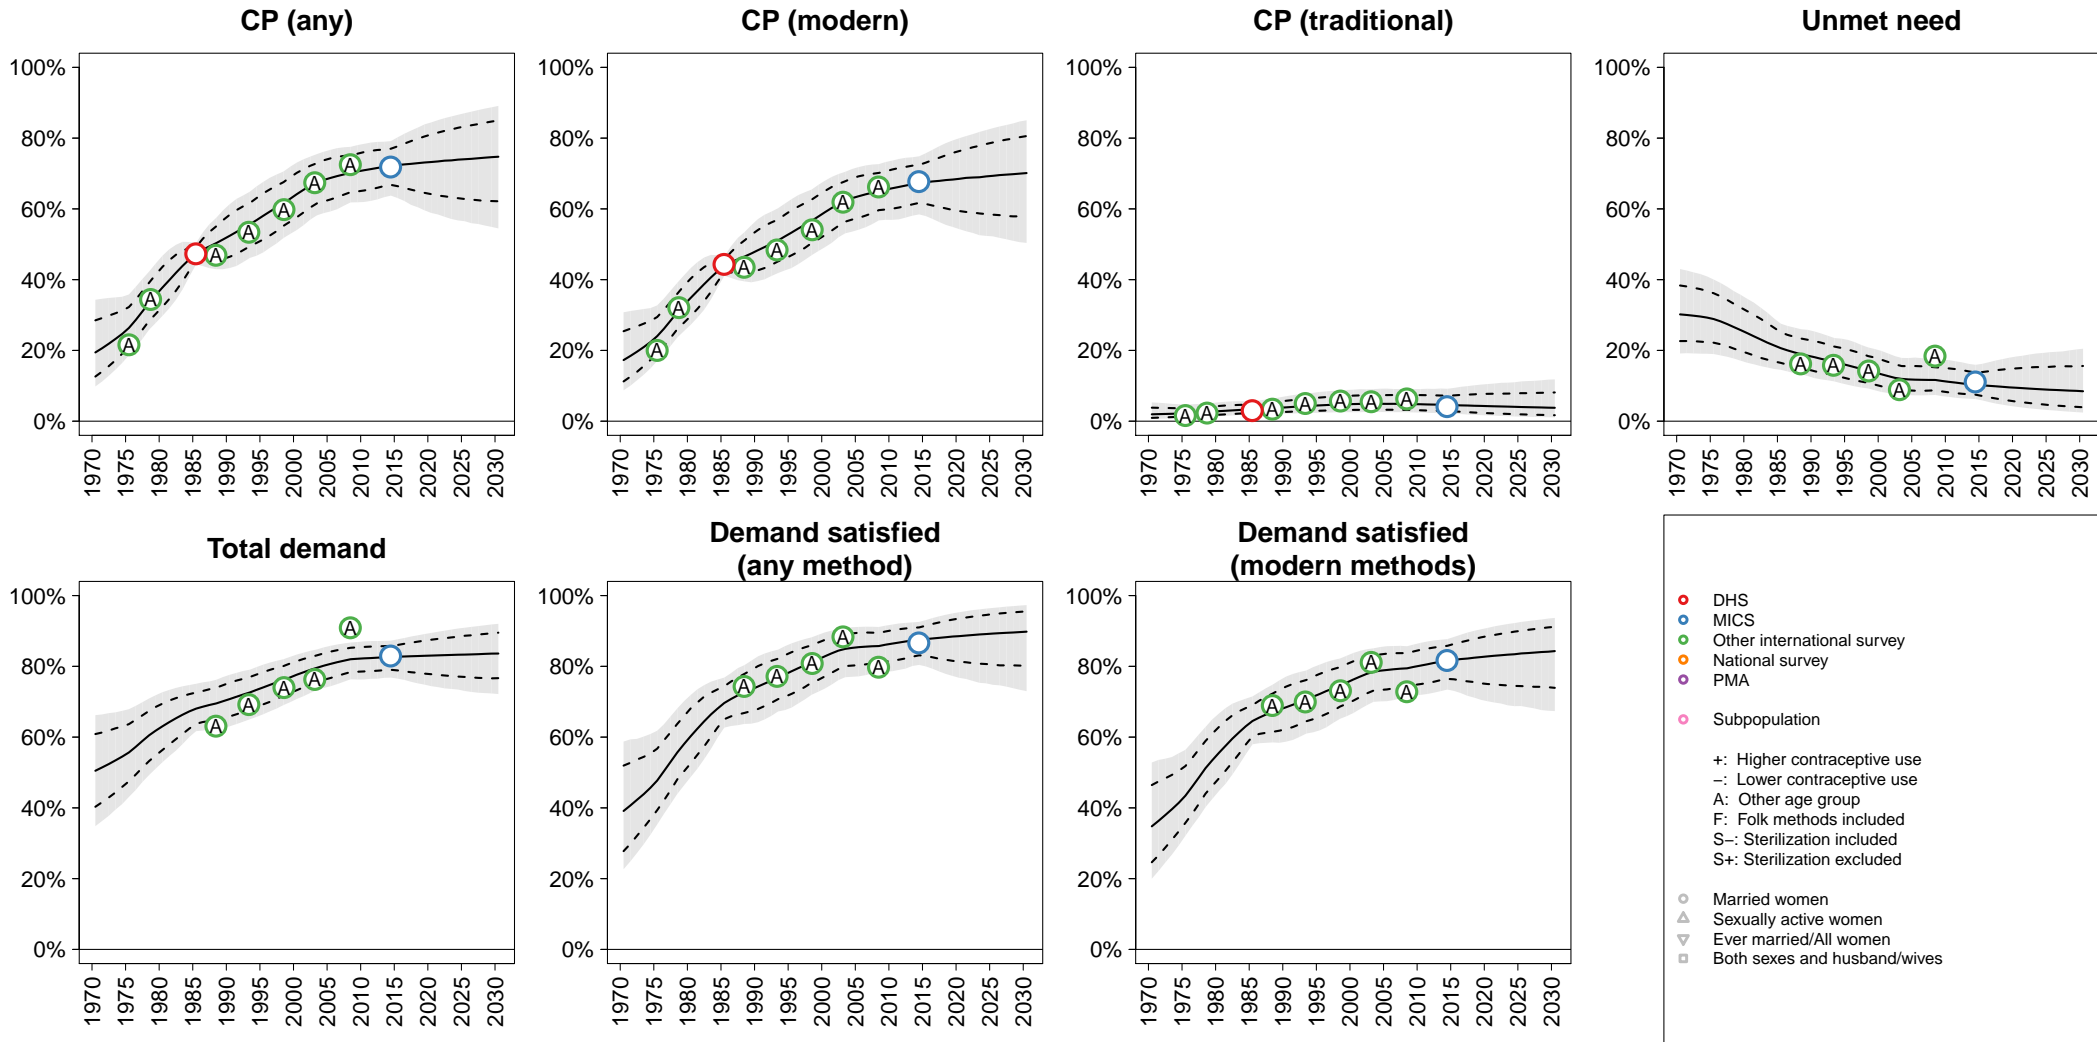

Equatorial Guinea (Middle Africa) --- Married / In-Union

CP (any)

CP (modern)

CP (traditional)

Unmet need

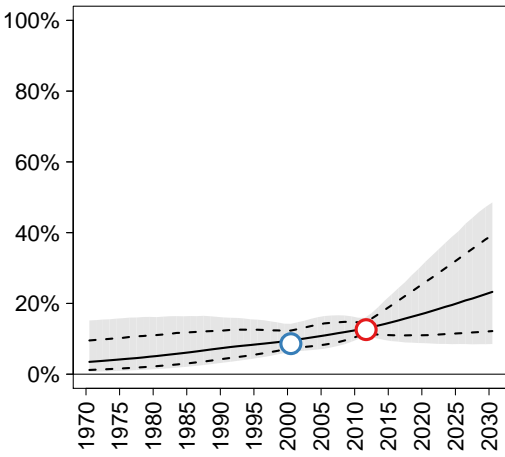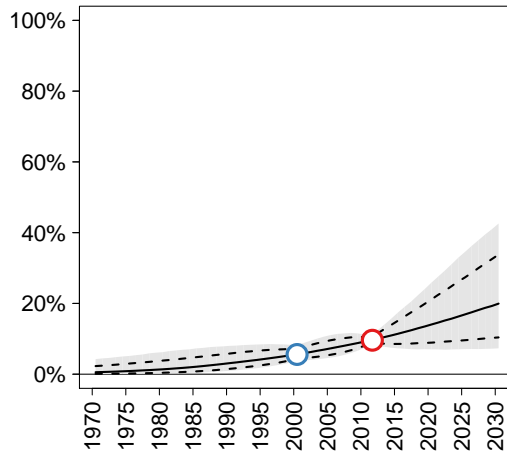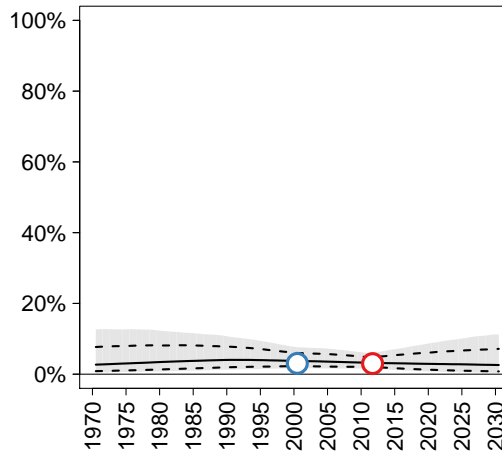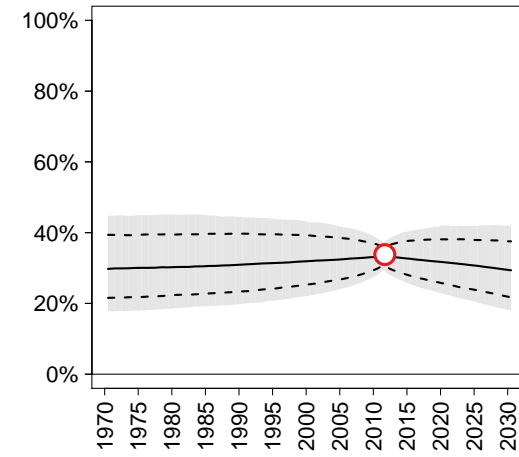

Total demand

Demand satisfied (any method)

Demand satisfied (modern methods)

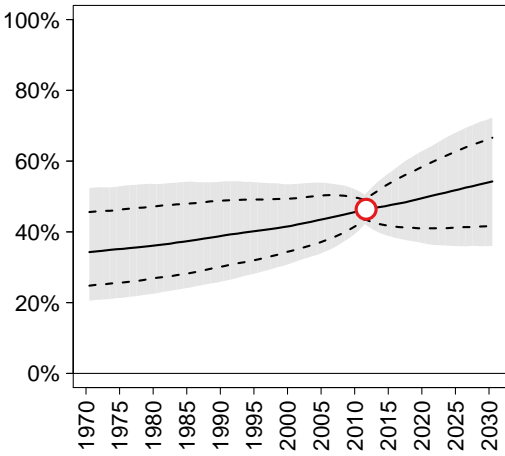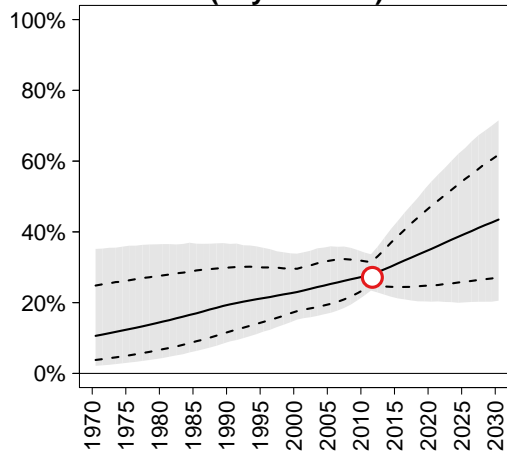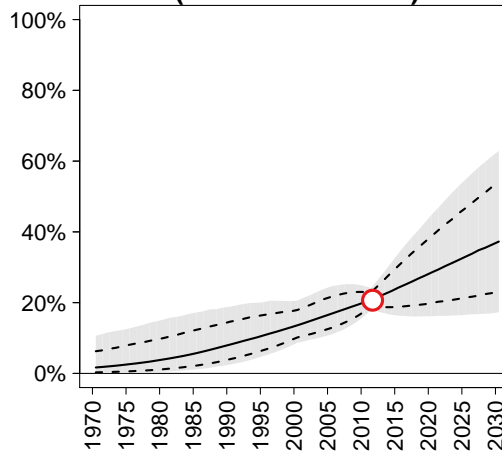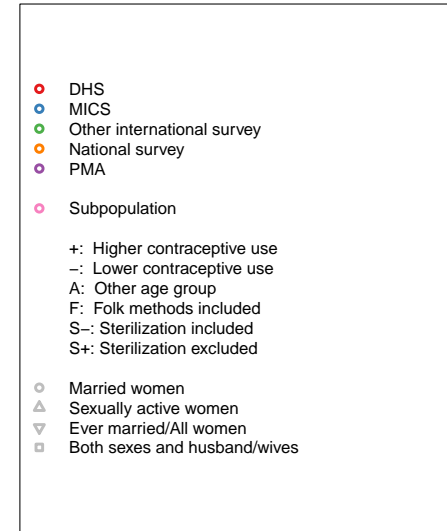

Eritrea (Eastern Africa) --- Married / In-Union

CP (any)

CP (modern)

CP (traditional)

Unmet need

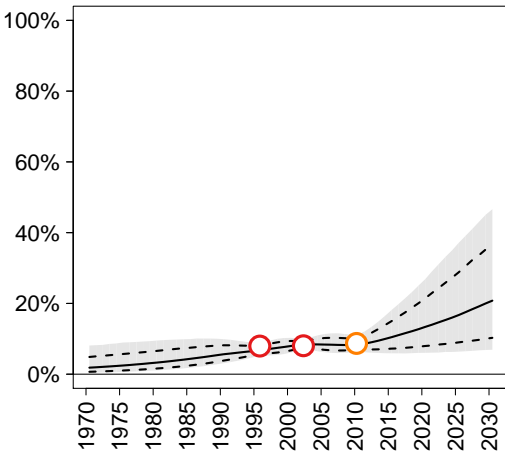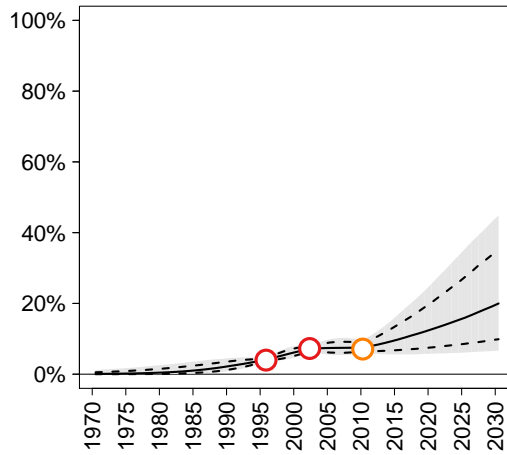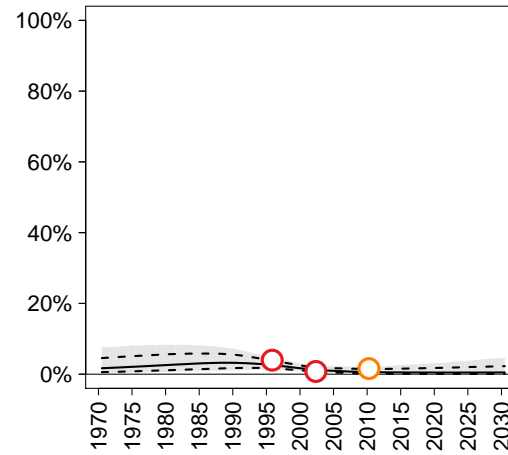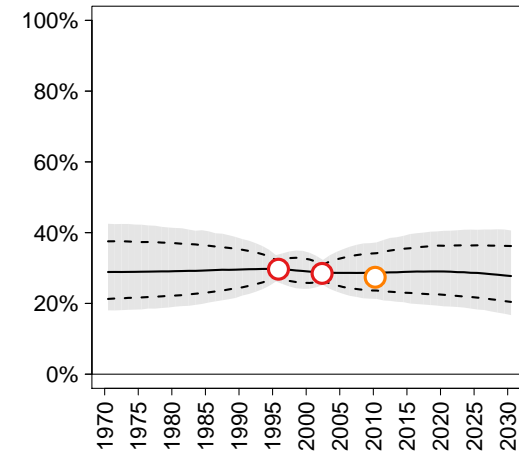

Total demand

Demand satisfied (any method)

Demand satisfied (modern methods)

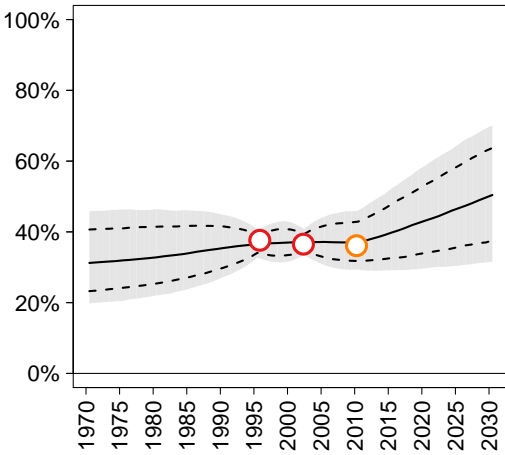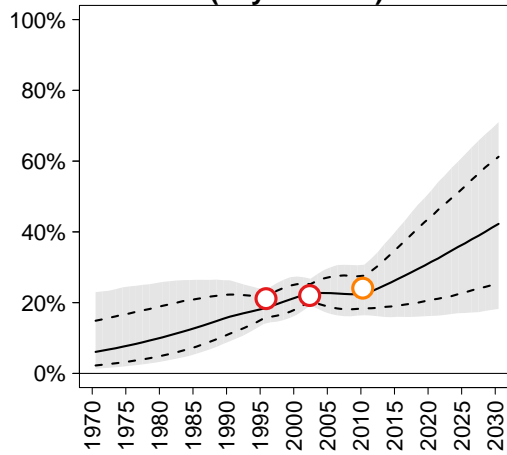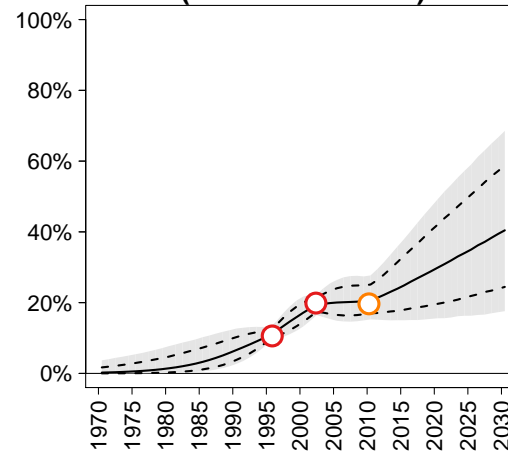

Estonia (Northern Europe) --- Married / In-Union

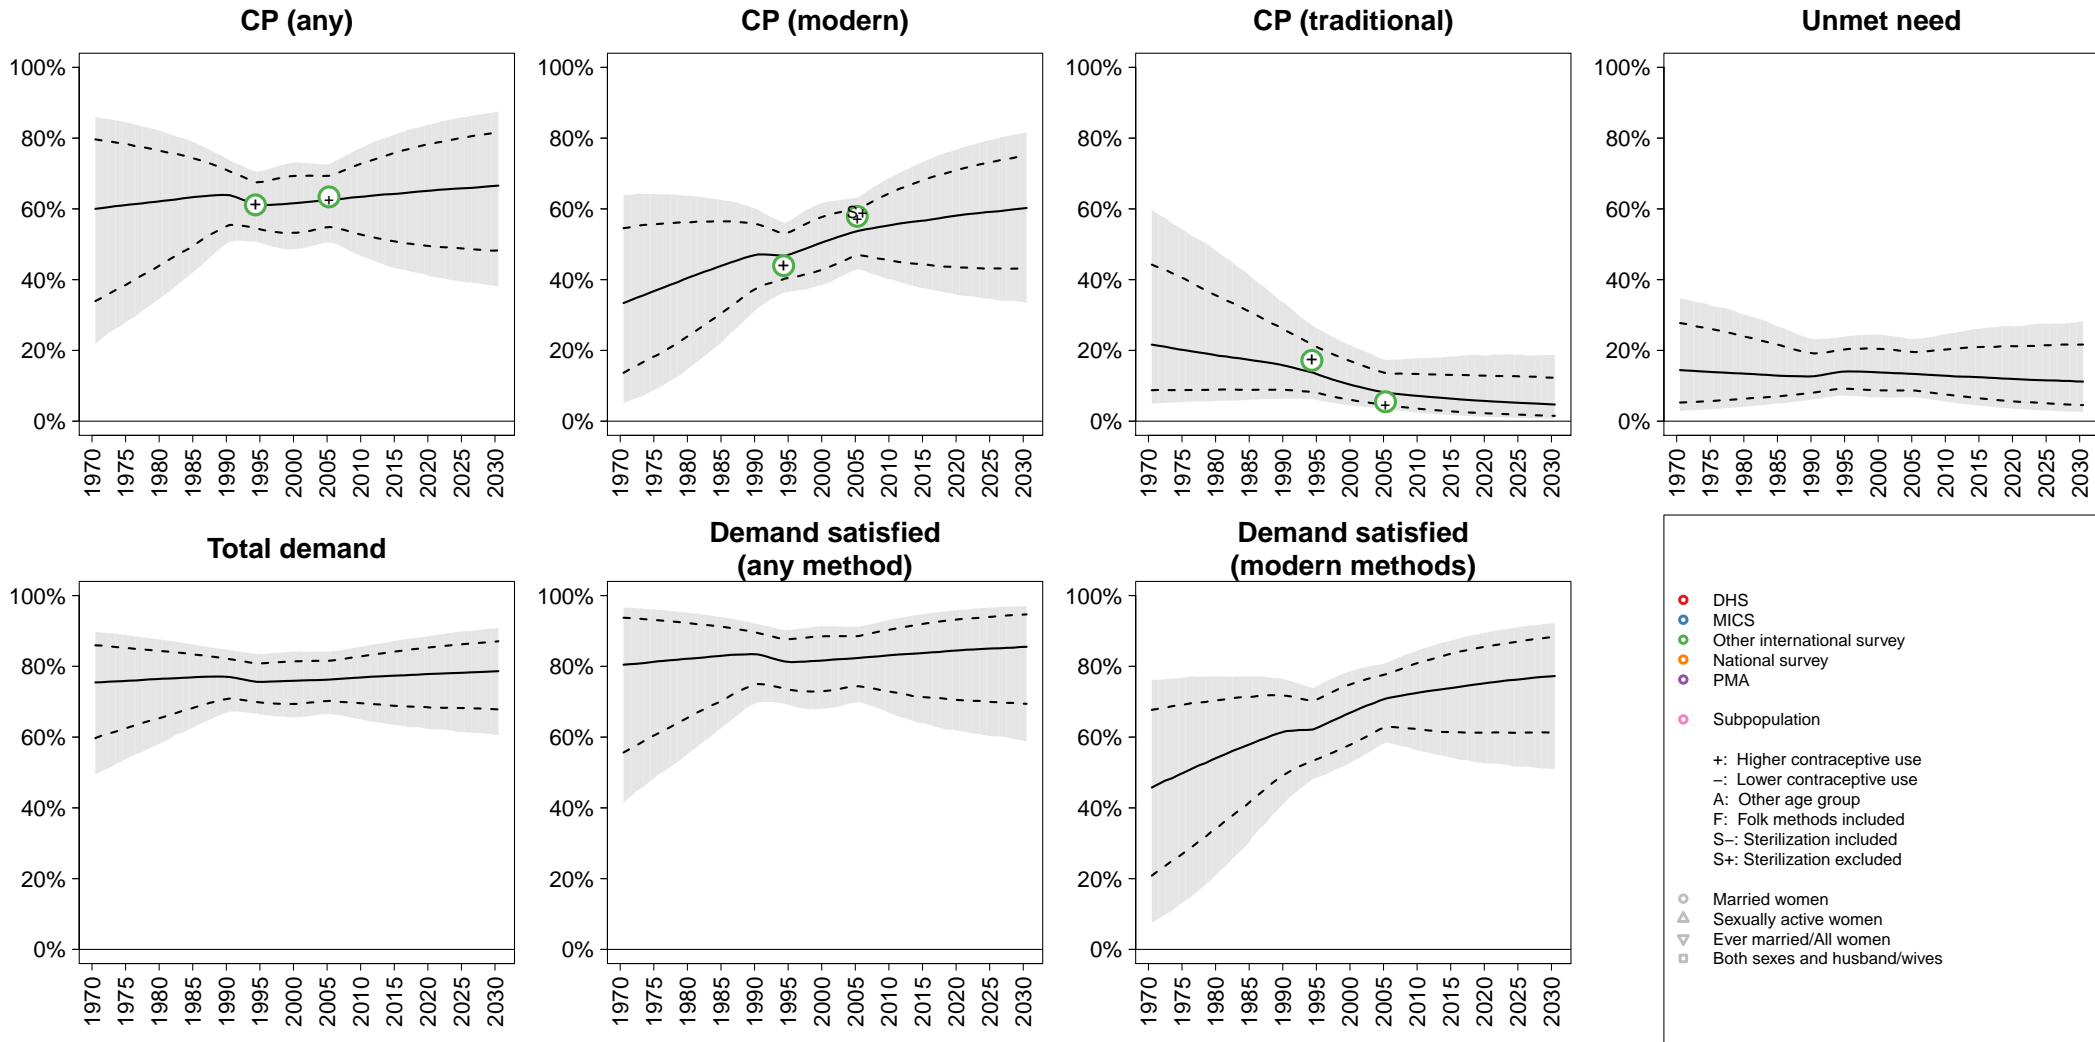

Eswatini (Southern Africa) --- Married / In-Union

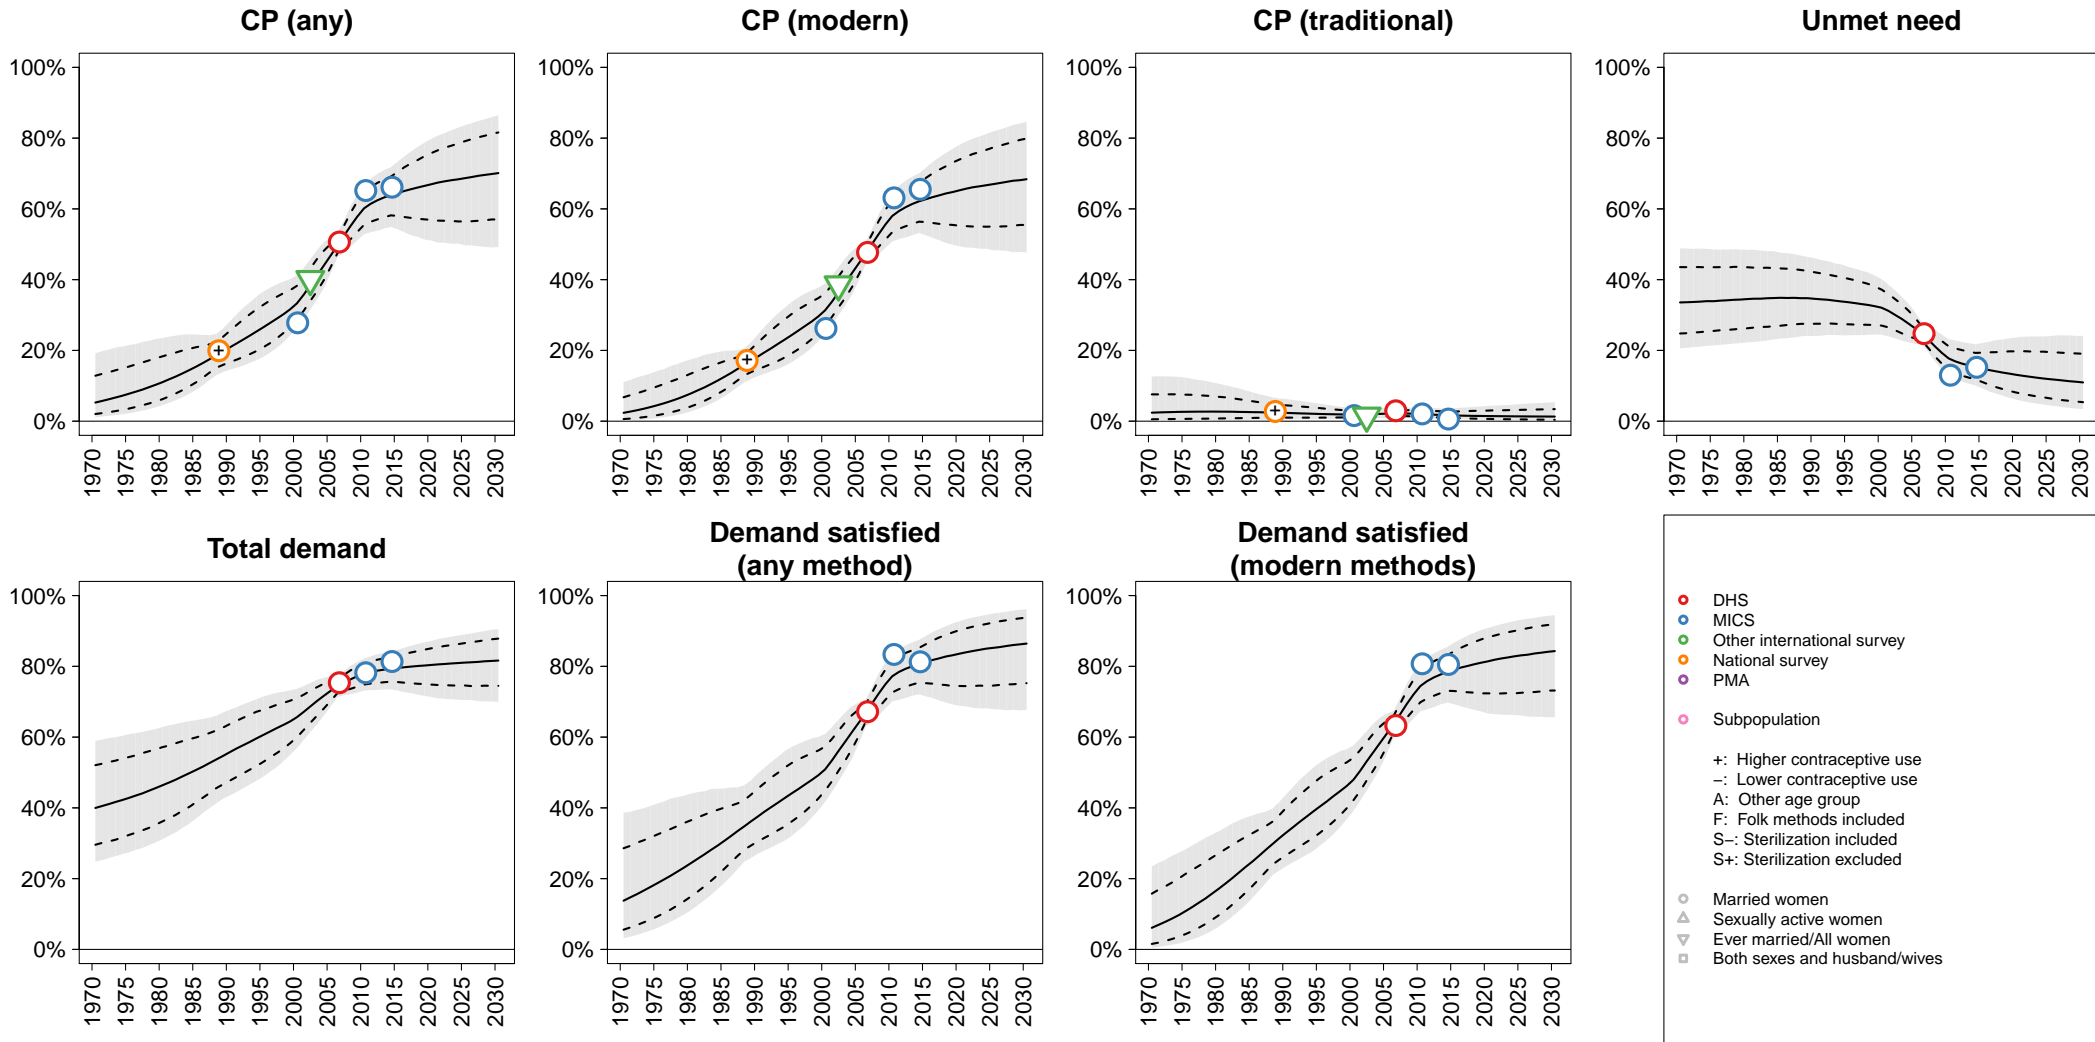

Ethiopia (Eastern Africa) --- Married / In-Union

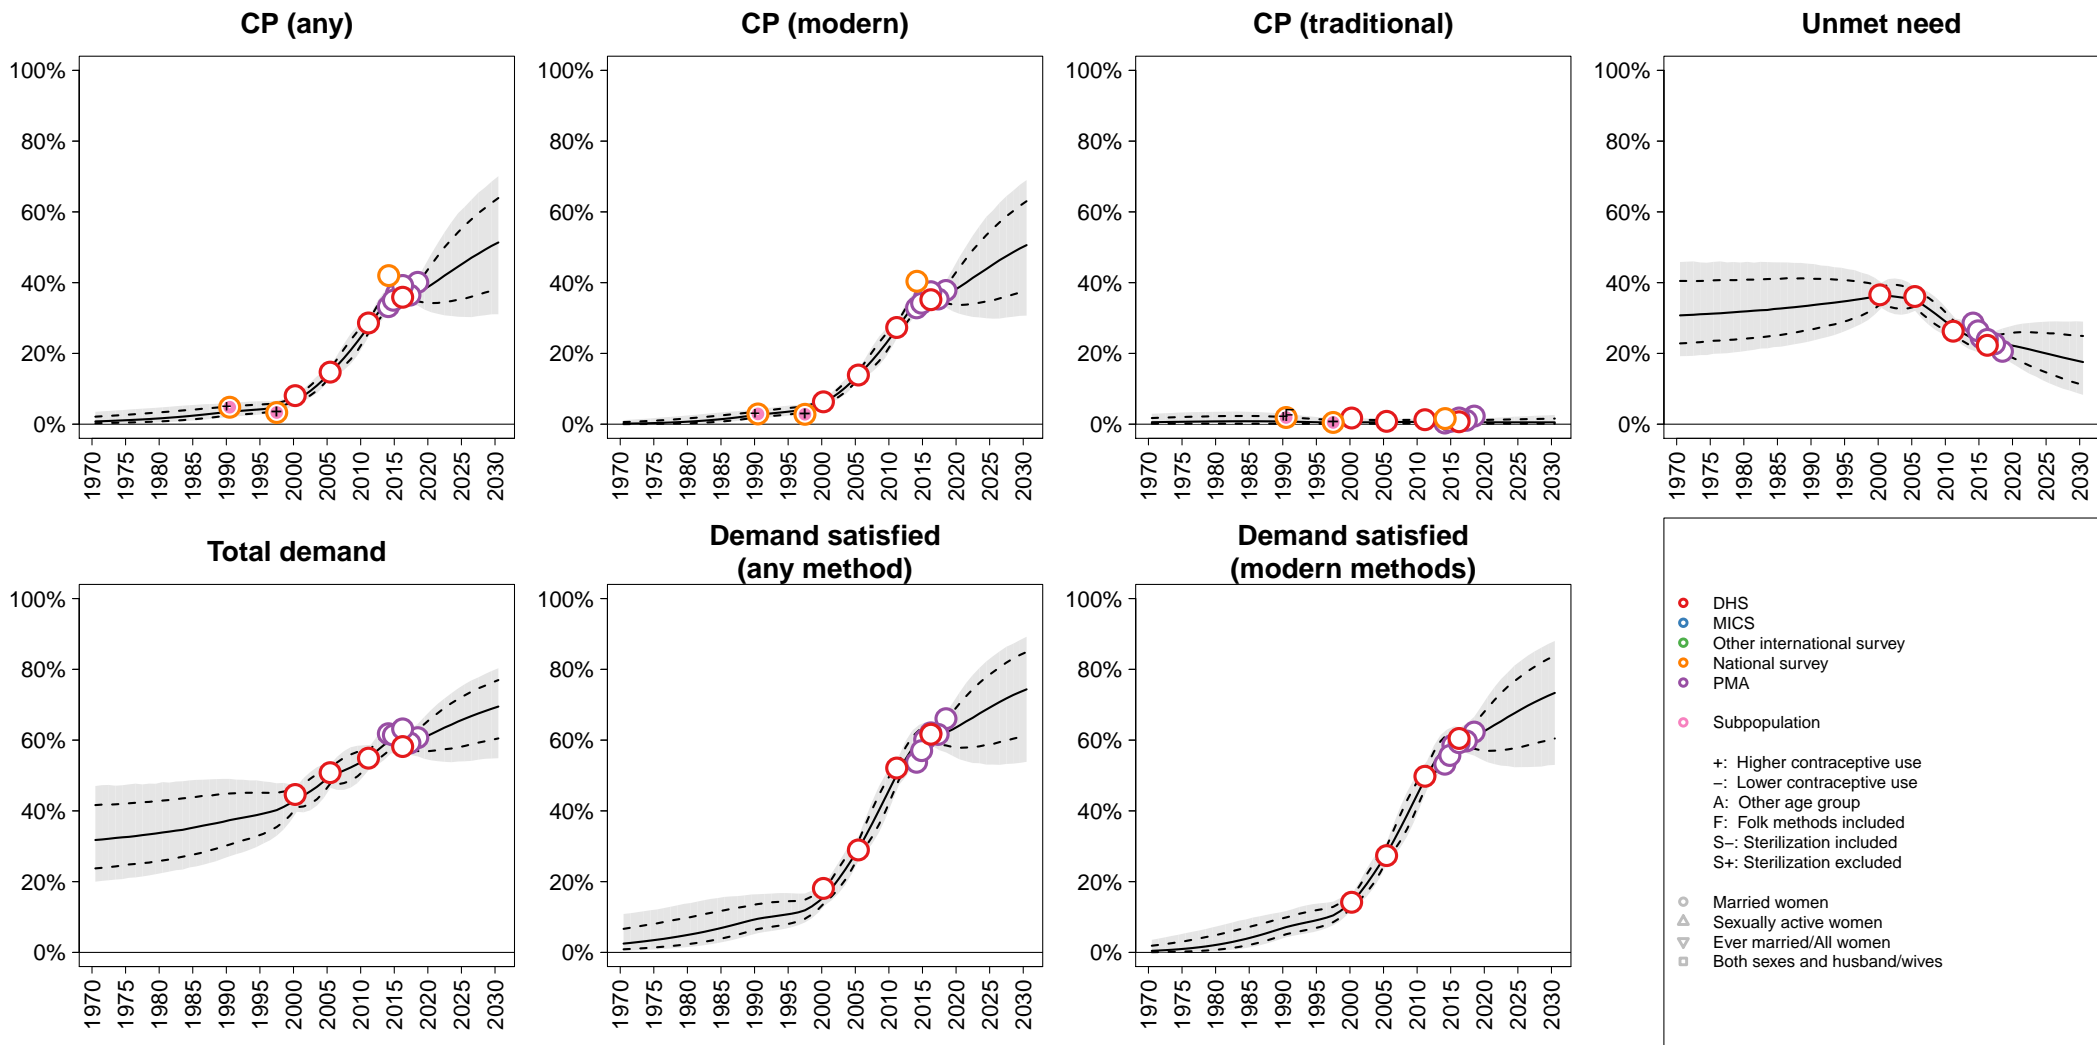



Fiji (Melanesia) --- Married / In-Union

CP (any)

CP (modern)

CP (traditional)

Unmet need

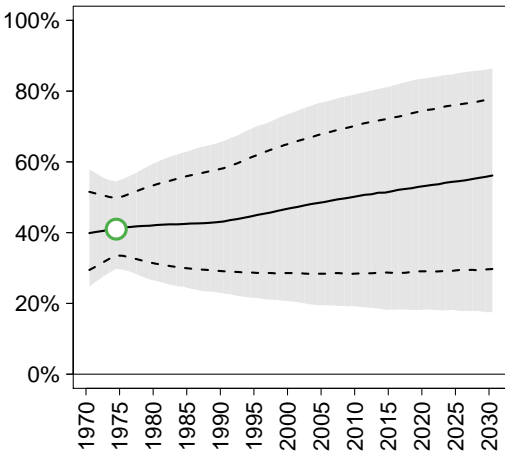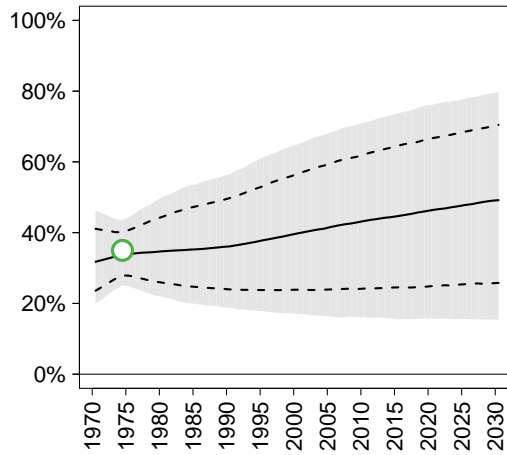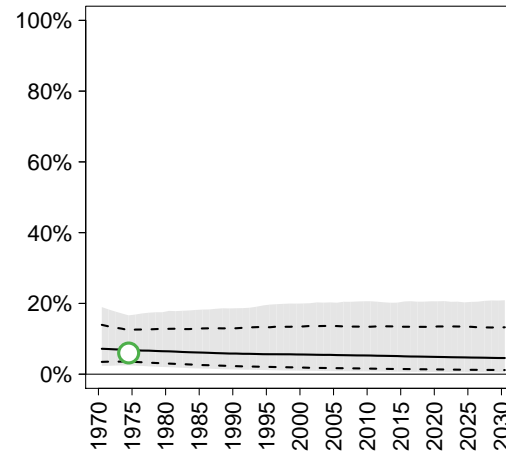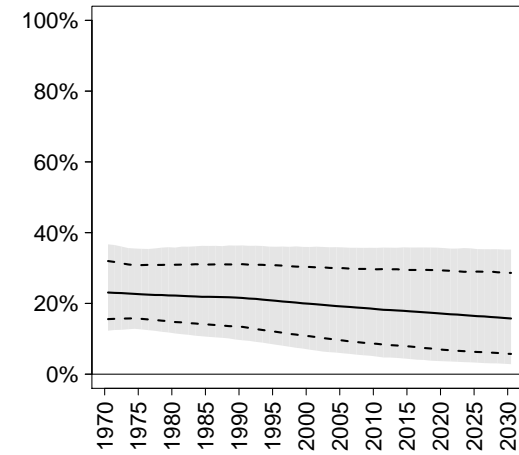

Total demand

Demand satisfied (any method)

Demand satisfied (modern methods)

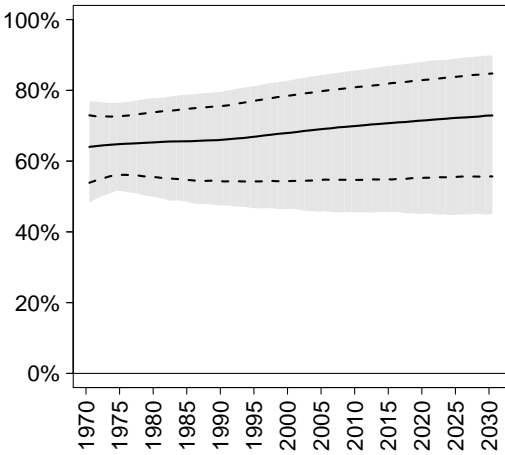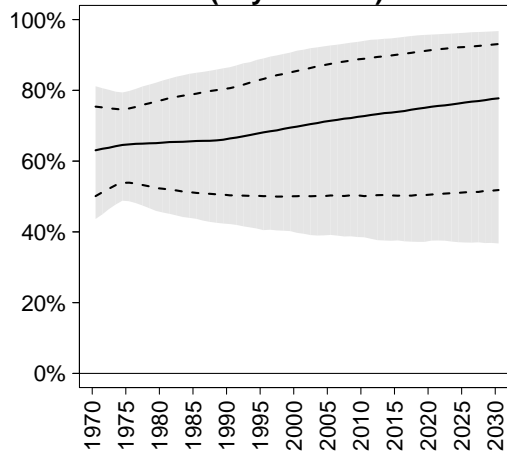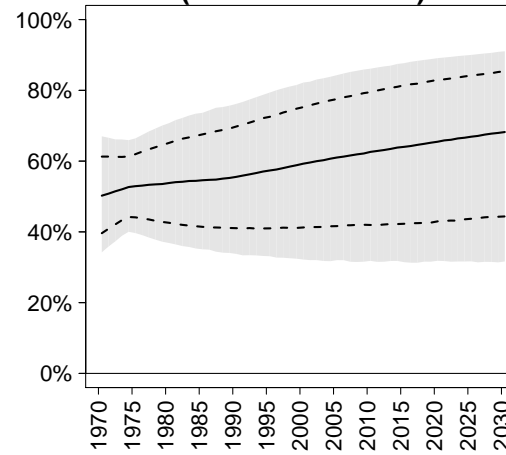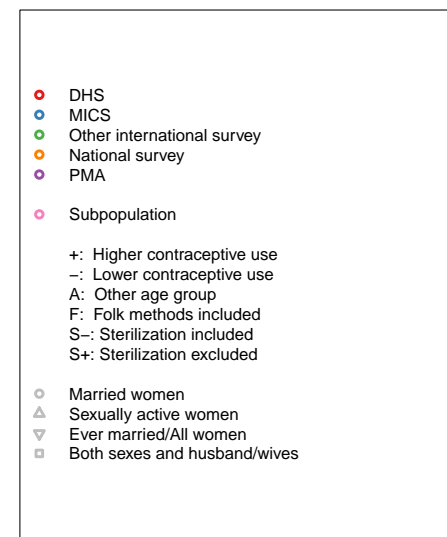

Finland (Northern Europe) --- Married / In-Union

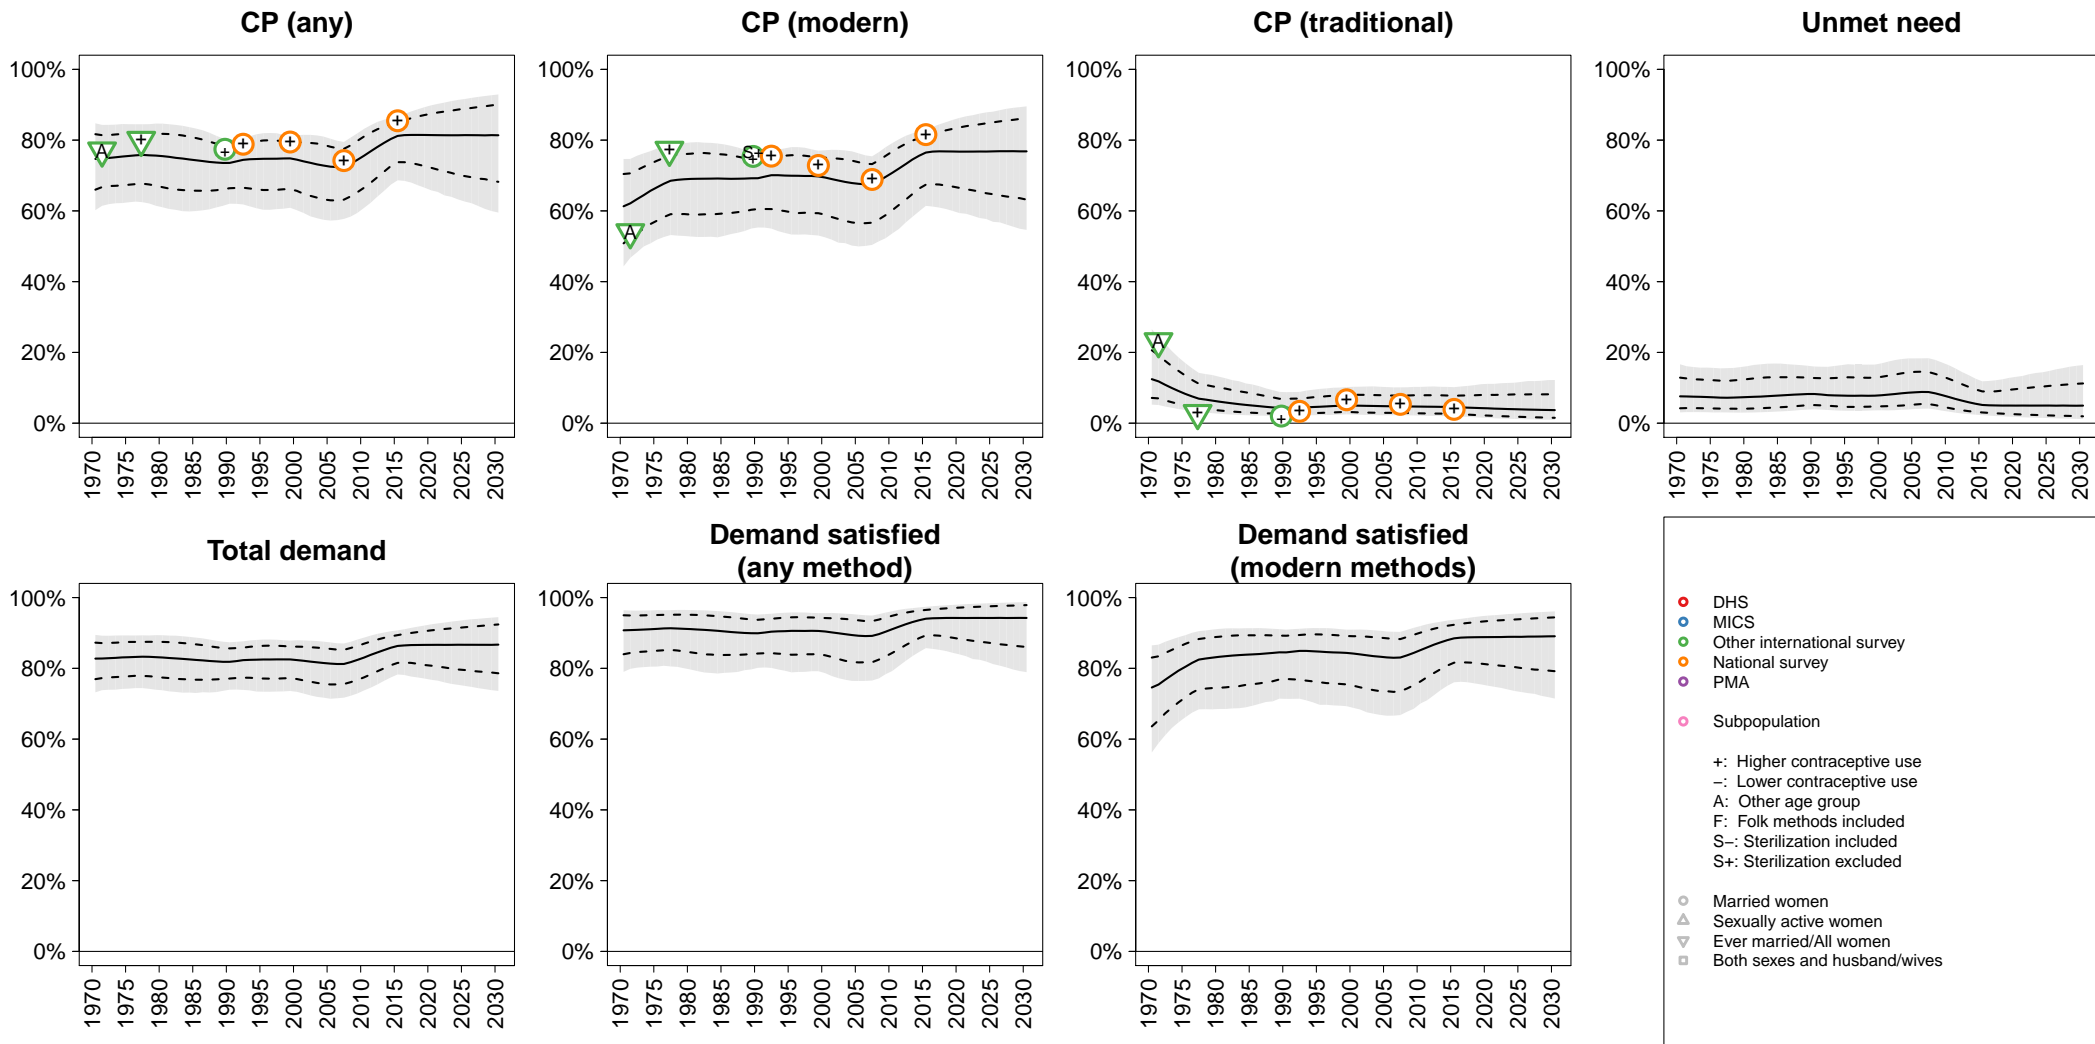

France (Western Europe) --- Married / In-Union

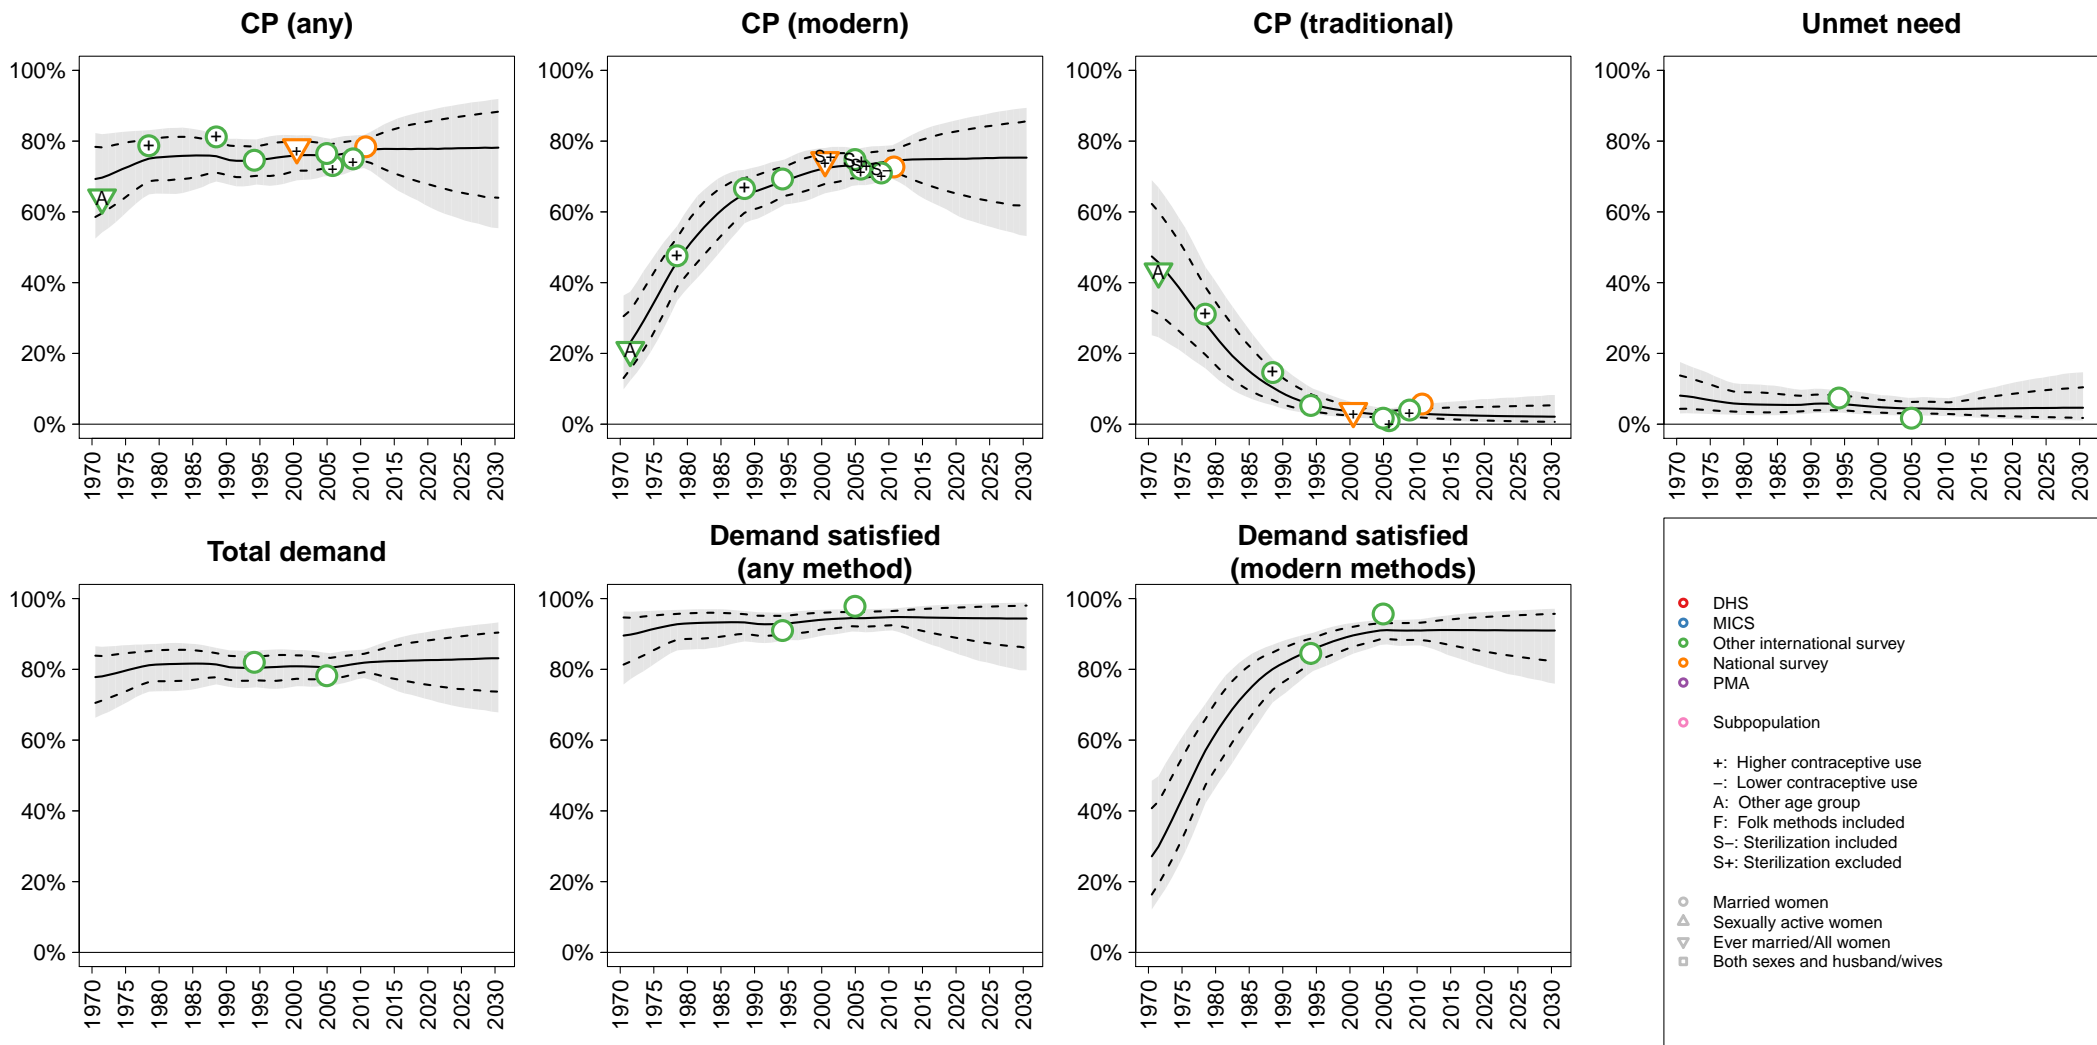

Gabon (Middle Africa) --- Married / In-Union

CP (any)

CP (modern)

CP (traditional)

Unmet need

Total demand

Demand satisfied (any method)

Demand satisfied (modern methods)

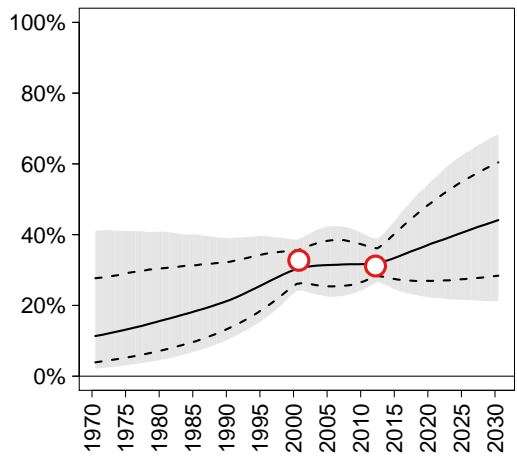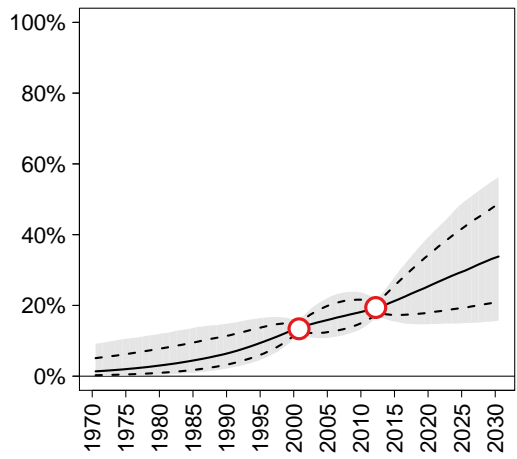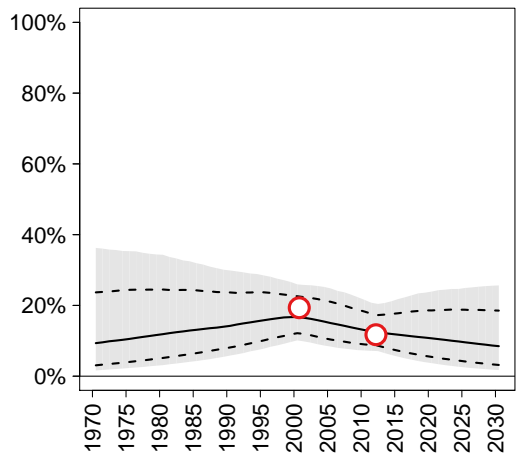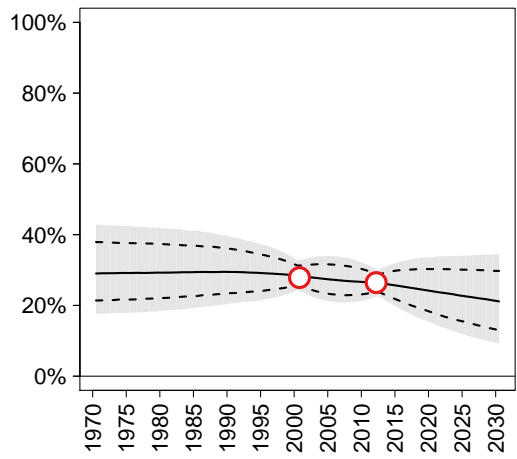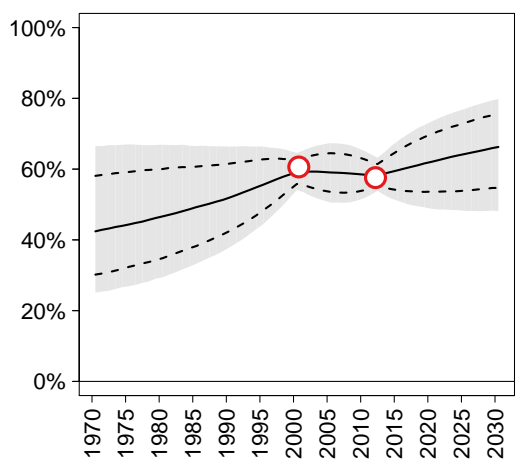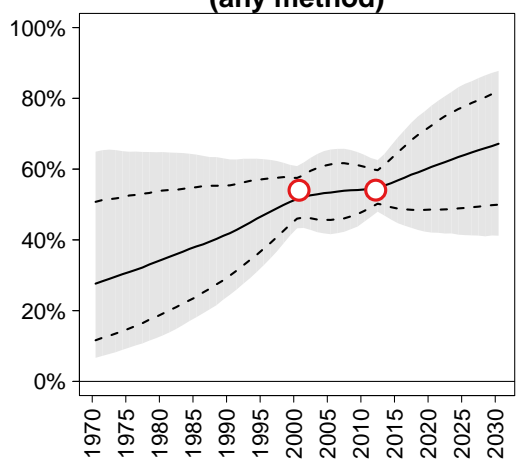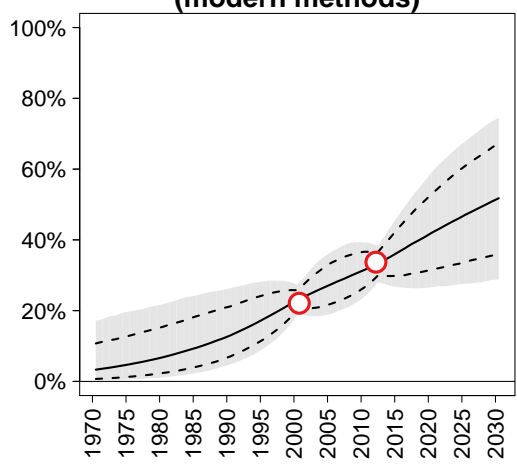

Gambia (Western Africa) --- Married / In-Union

CP (any)

CP (modern)

CP (traditional)

Unmet need

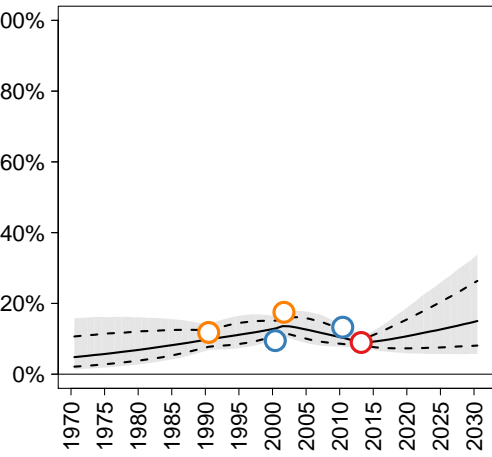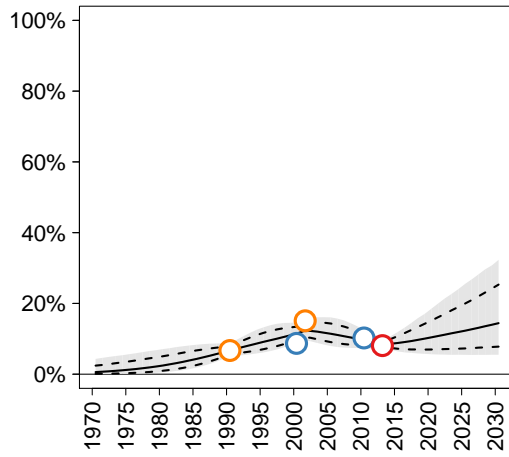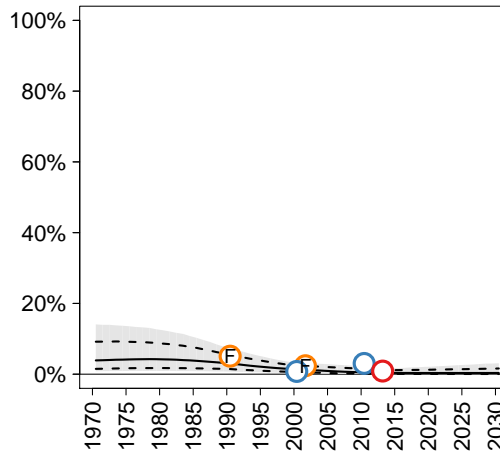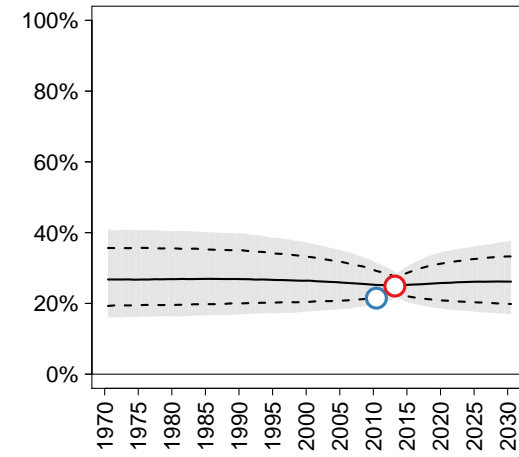

Total demand

Demand satisfied (any method)

Demand satisfied (modern methods)

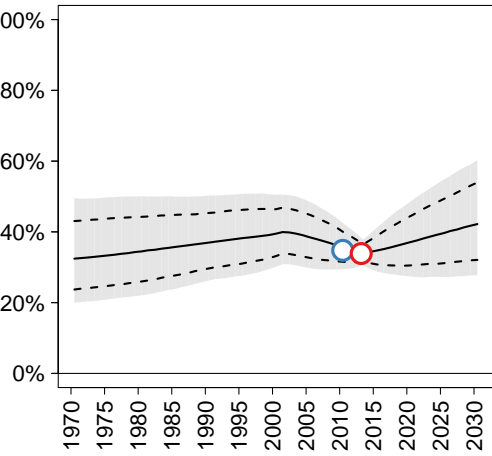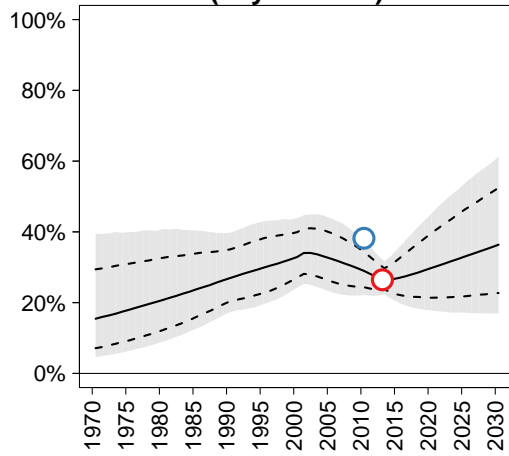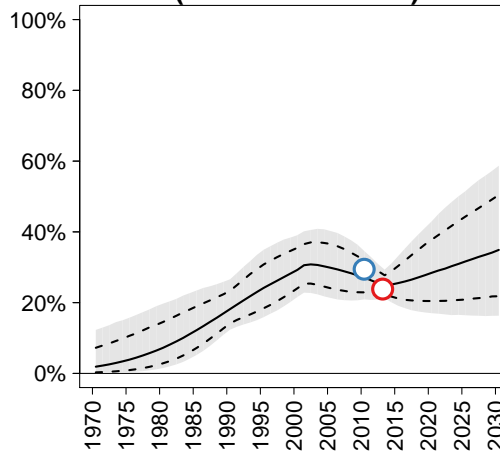

Georgia (Western Asia) --- Married / In-Union

CP (any)

CP (modern)

CP (traditional)

Unmet need

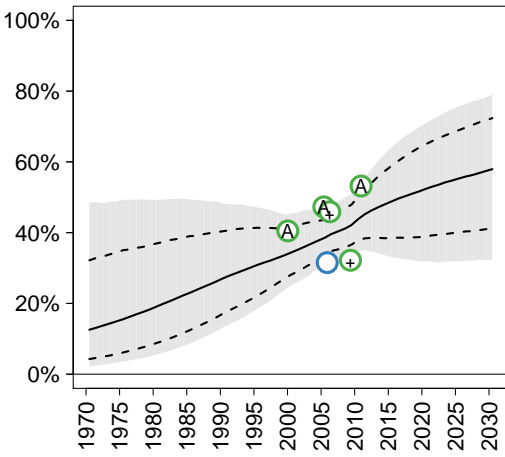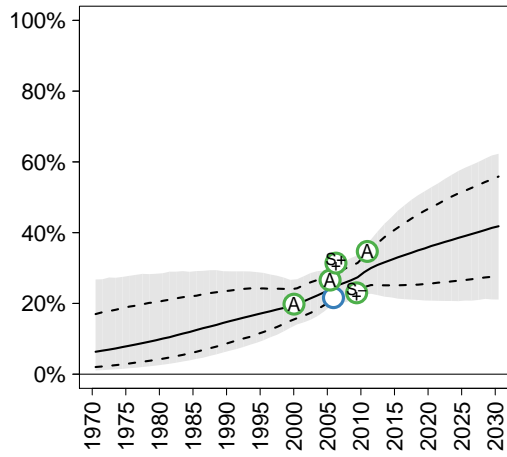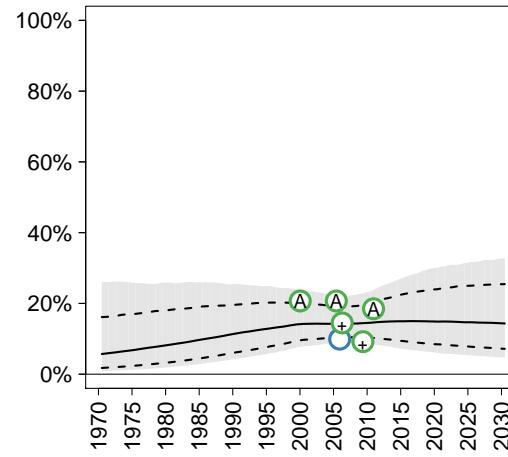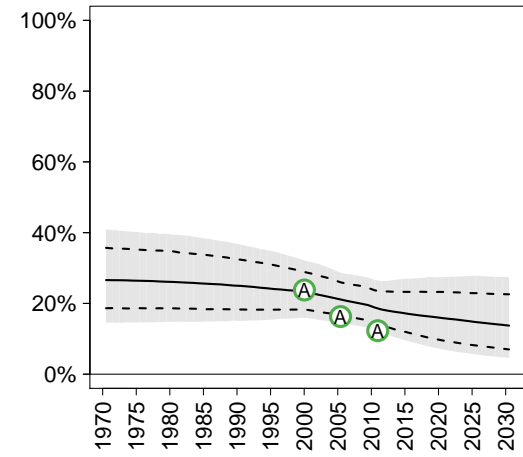

Total demand

Demand satisfied (any method)

Demand satisfied (modern methods)

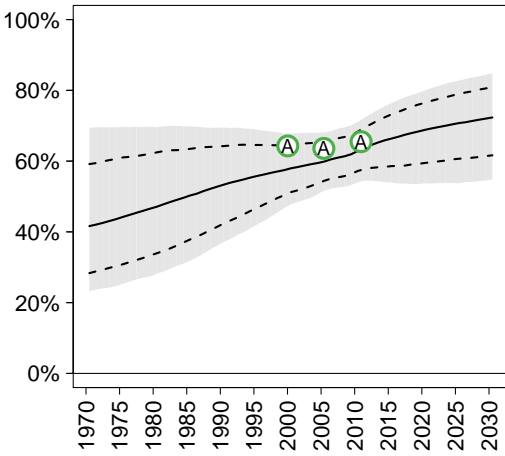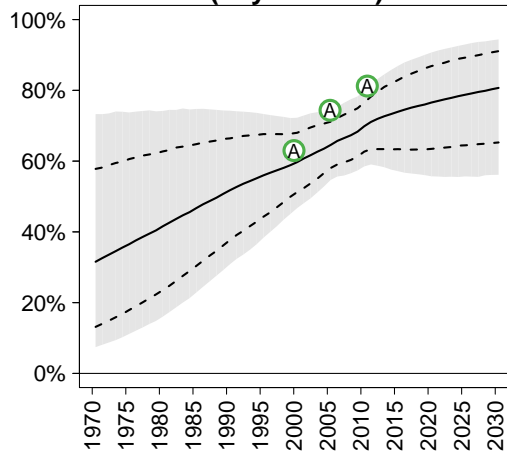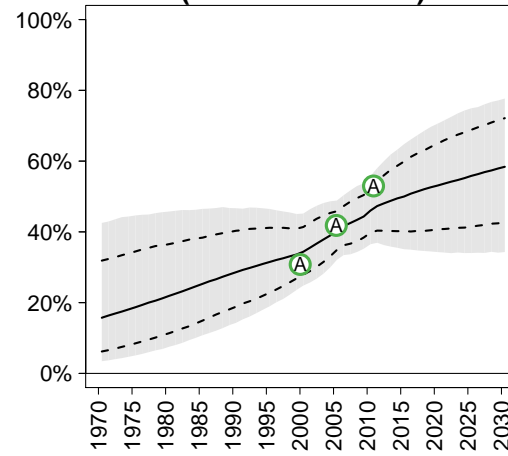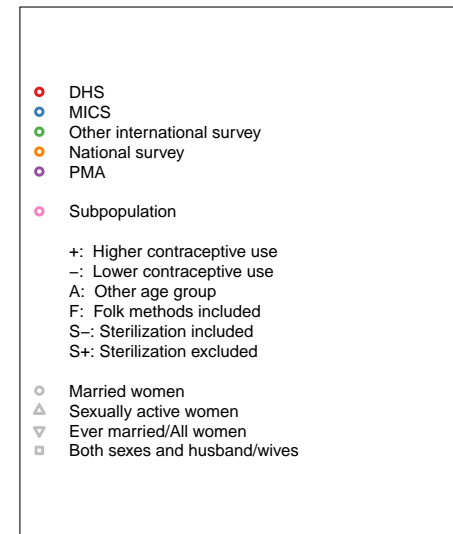

Germany (Western Europe) --- Married / In-Union

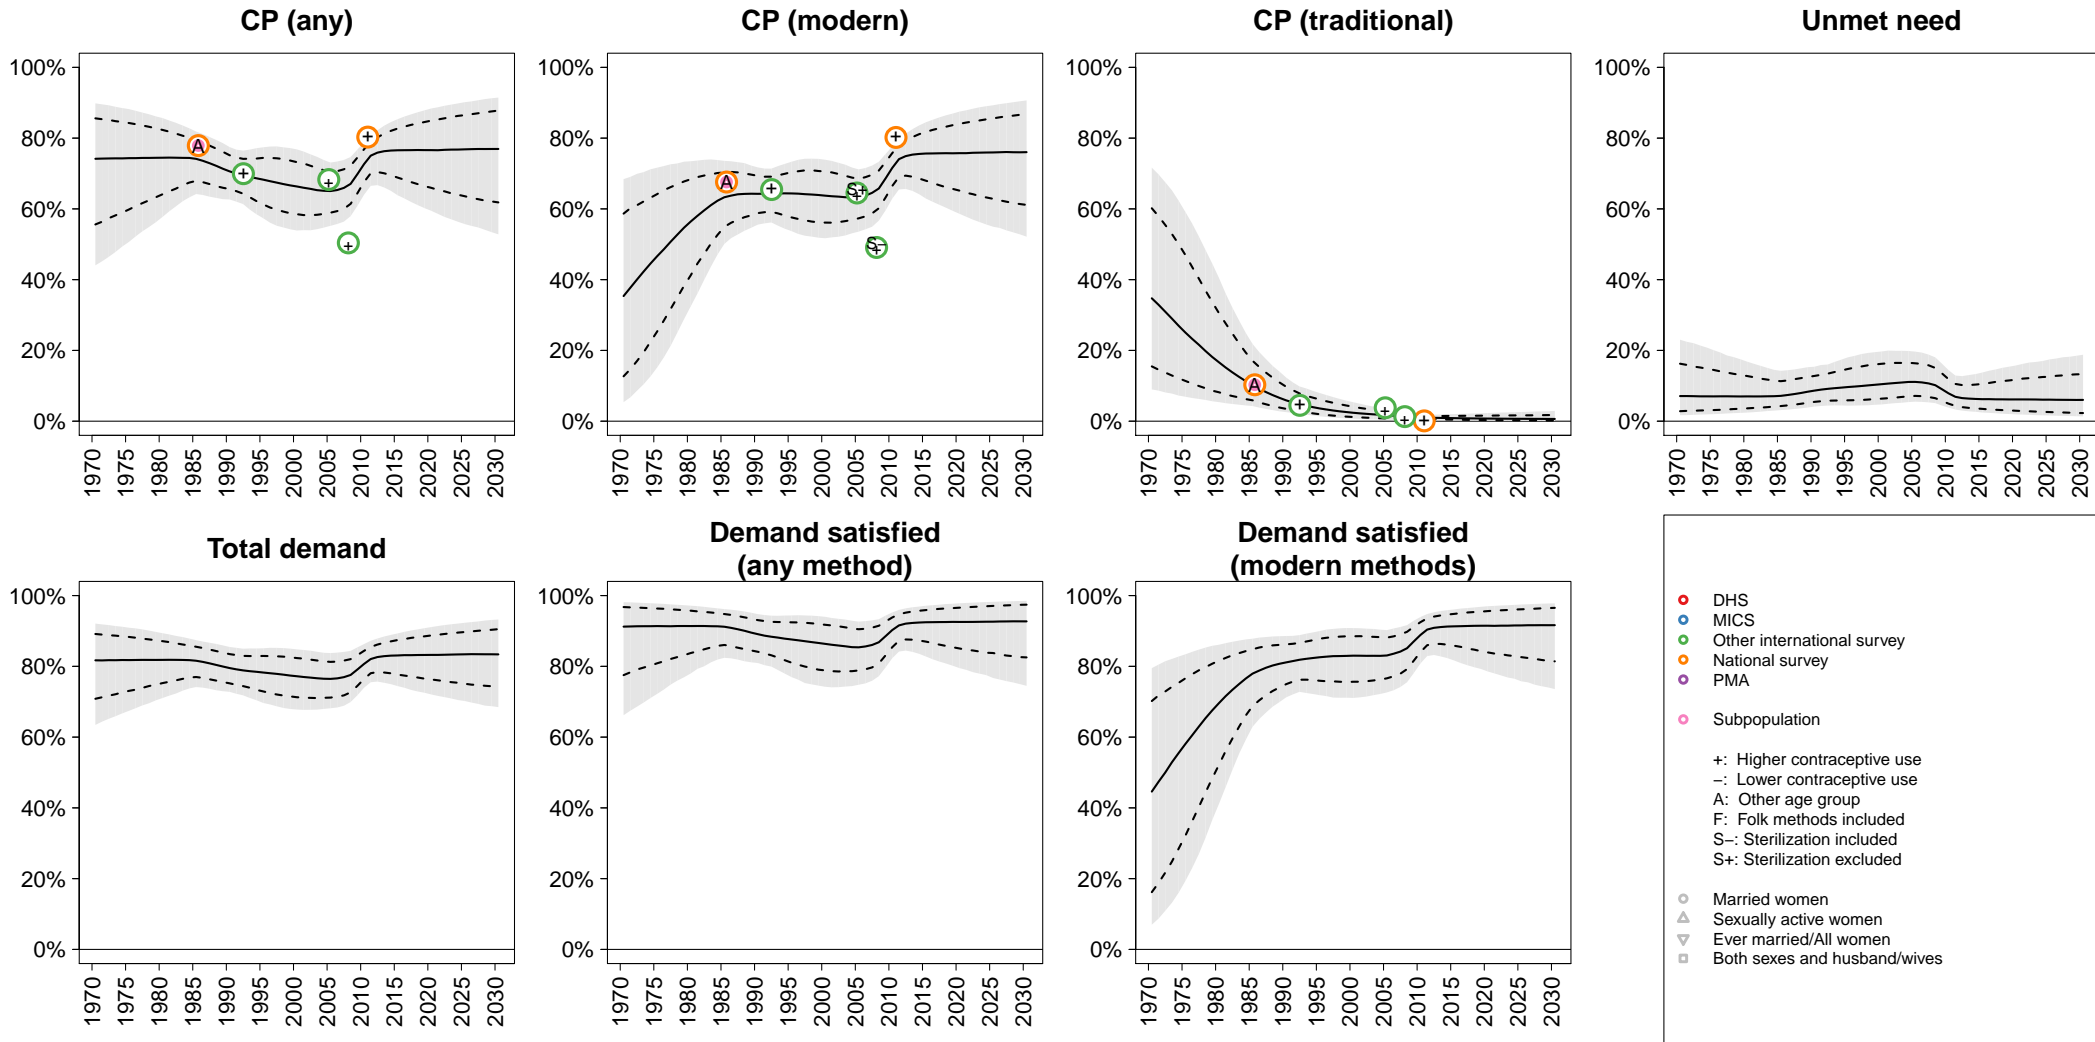

### Ghana (Western Africa) --- Married / In-Union

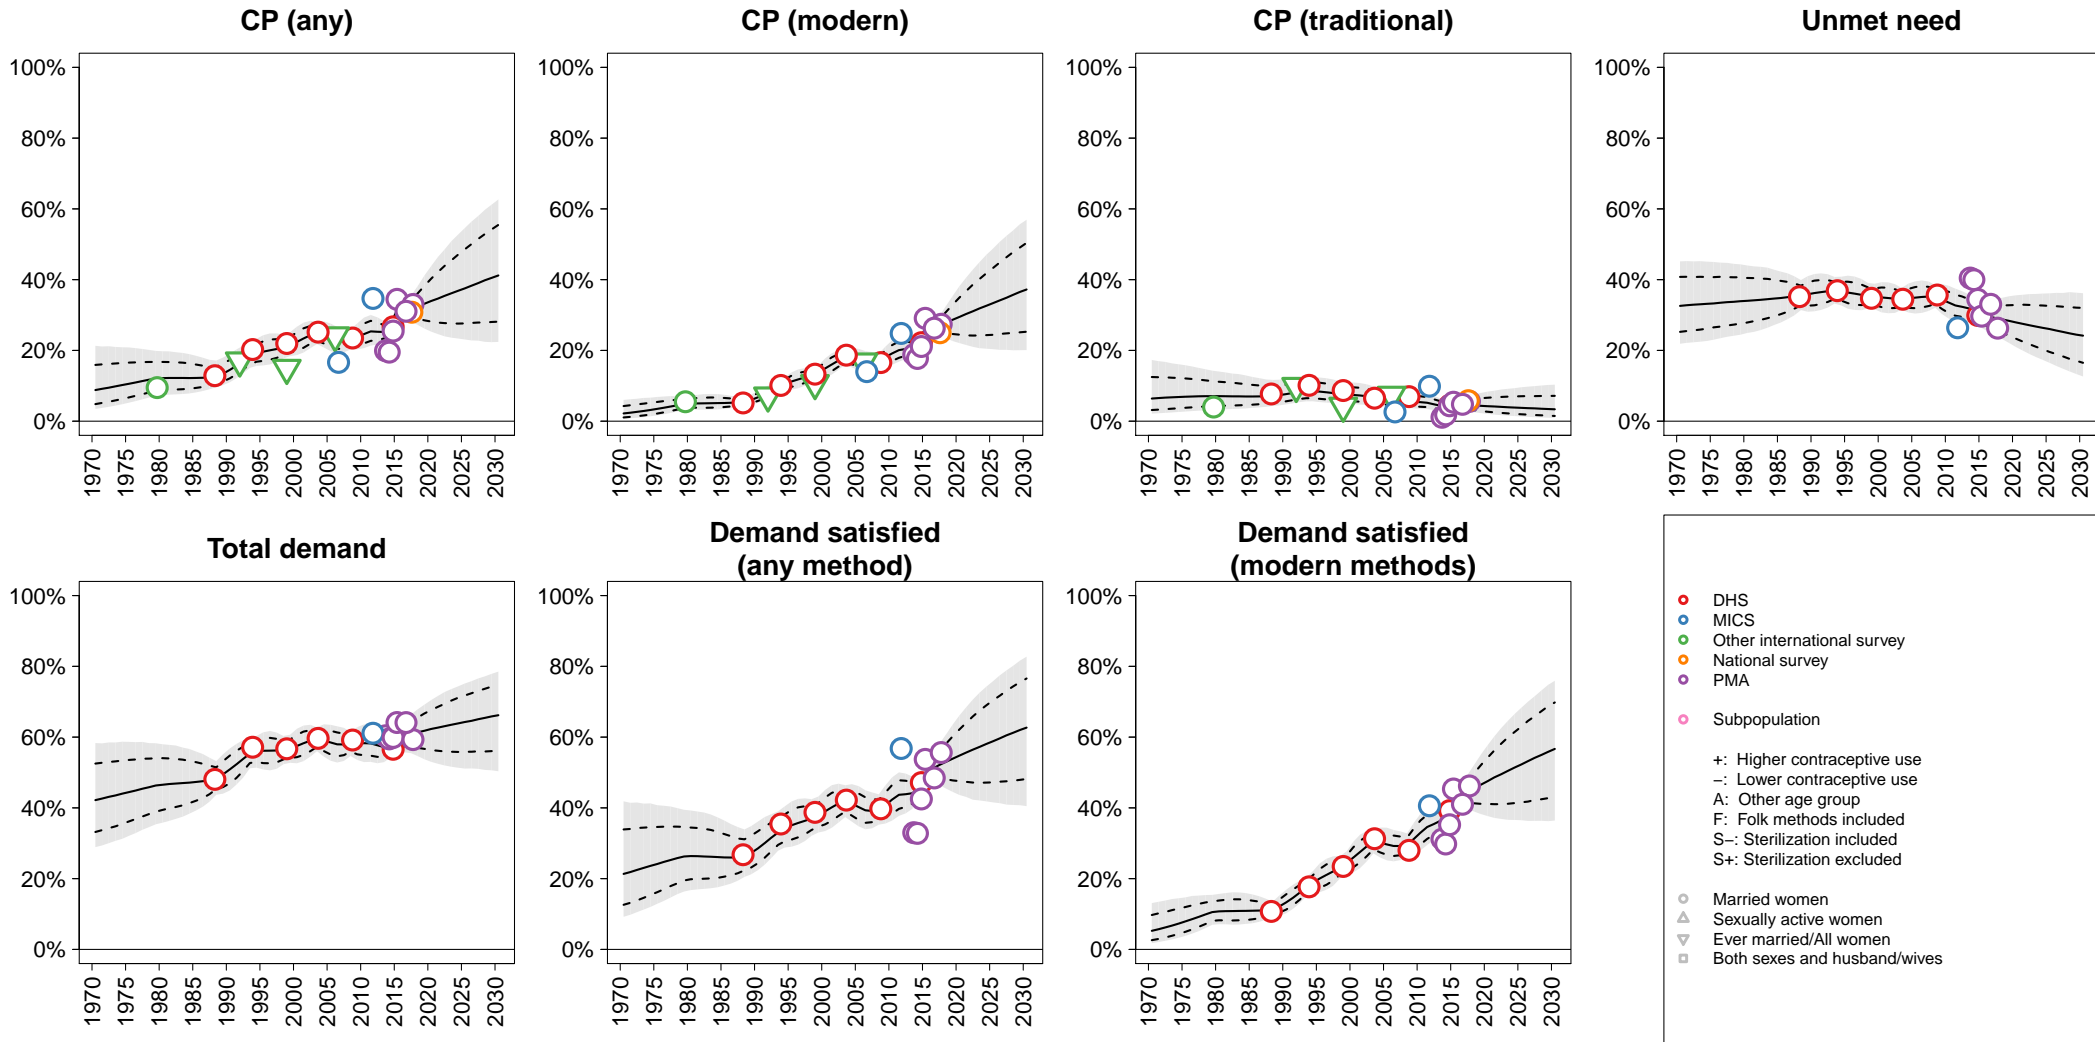



Greece (Southern Europe) --- Married / In-Union

CP (any)

CP (modern)

CP (traditional)

Unmet need

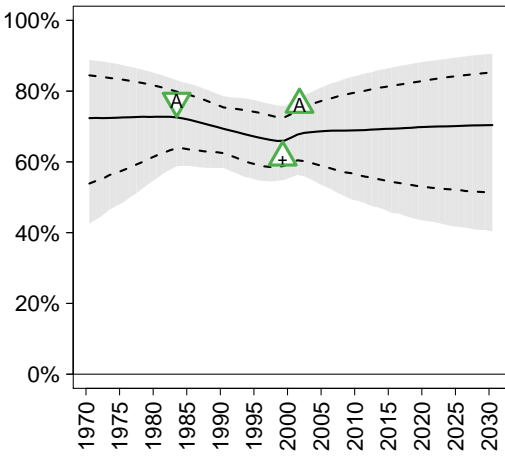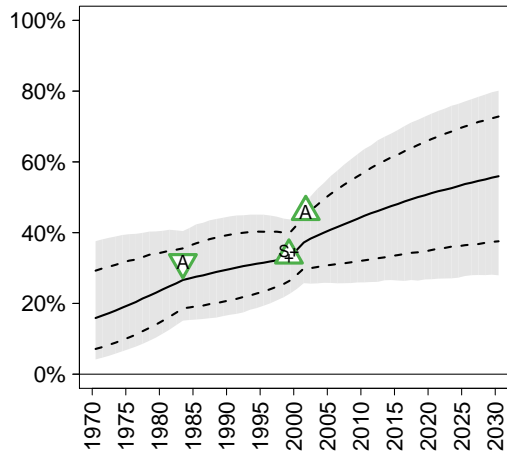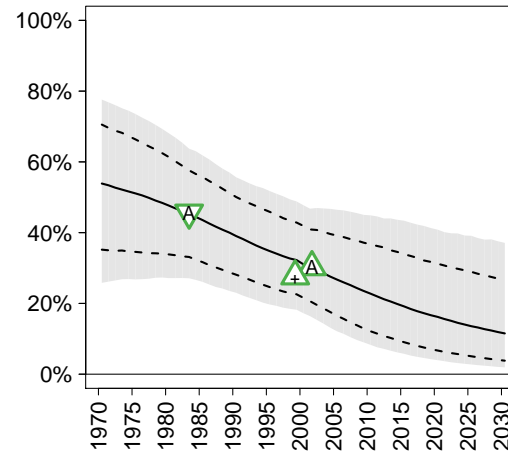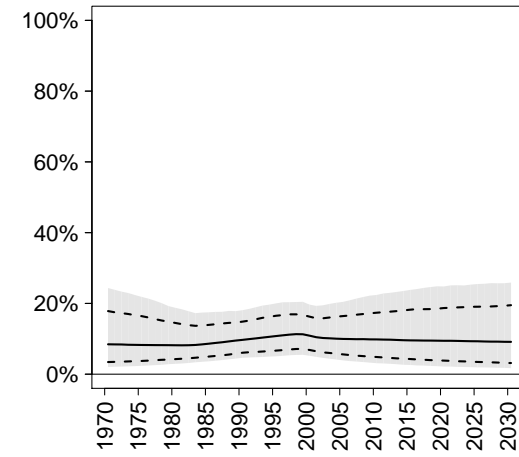

Total demand

Demand satisfied (any method)

Demand satisfied (modern methods)

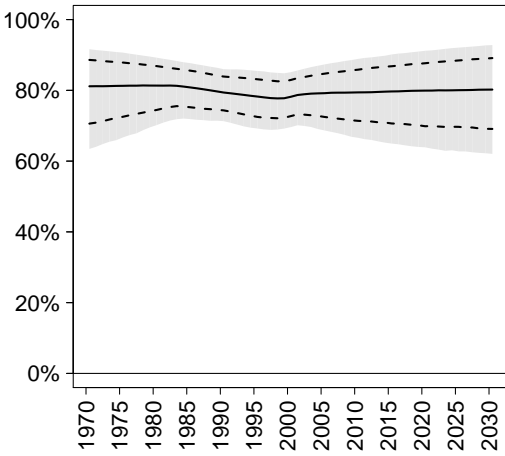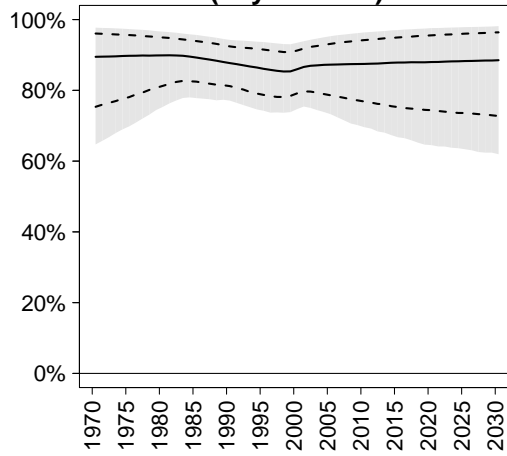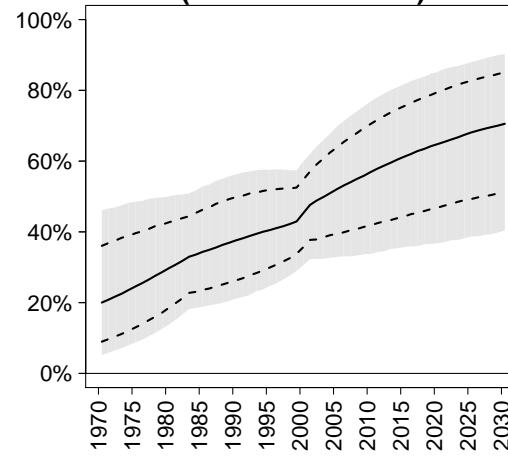

Grenada (Caribbean) --- Married / In-Union

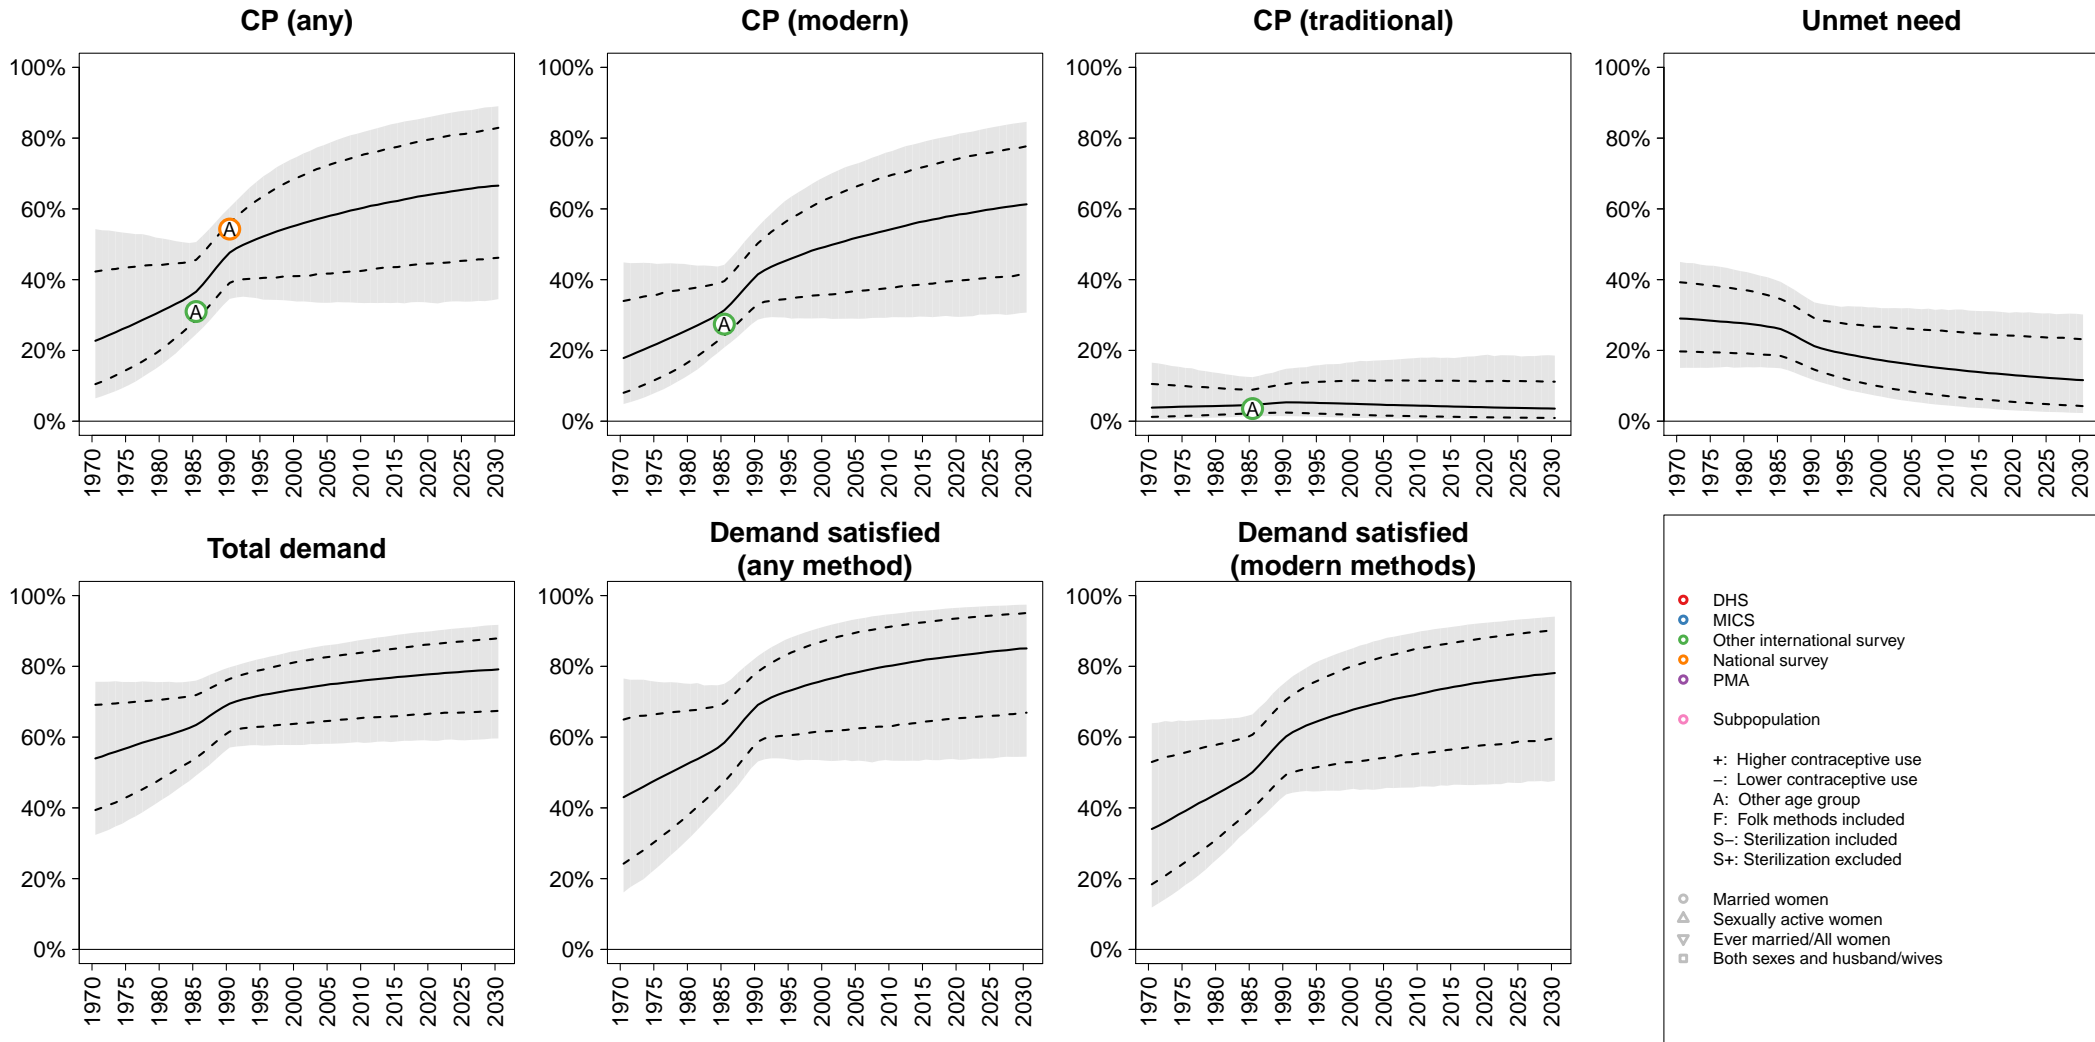

Guadeloupe (Caribbean) --- Married / In-Union

CP (any)

CP (modern)

CP (traditional)

Unmet need

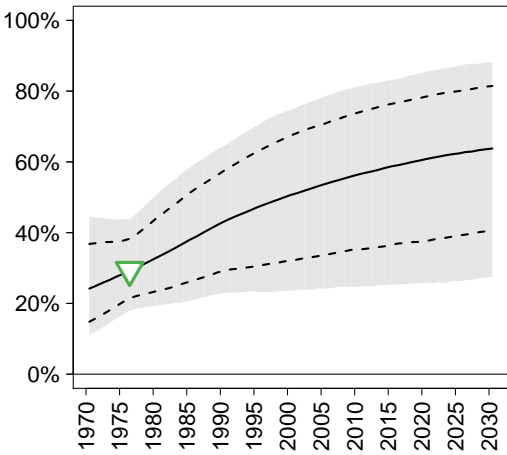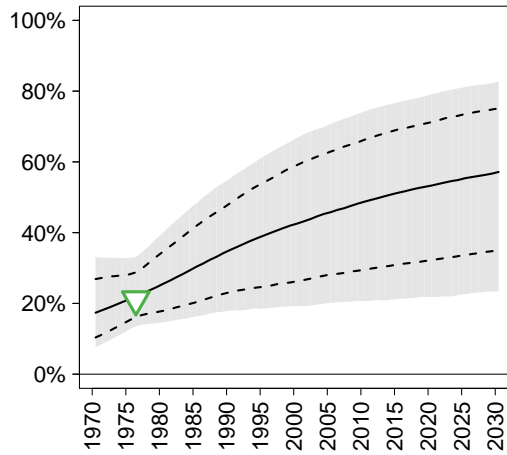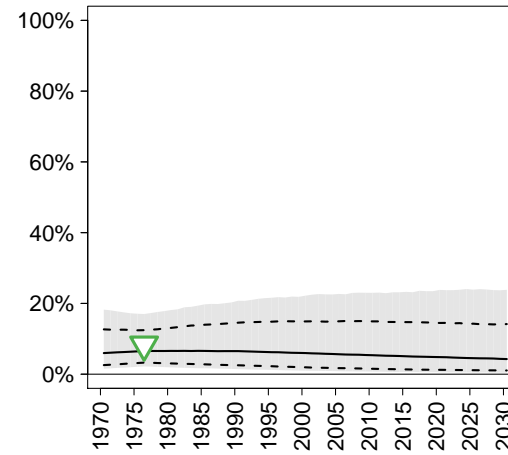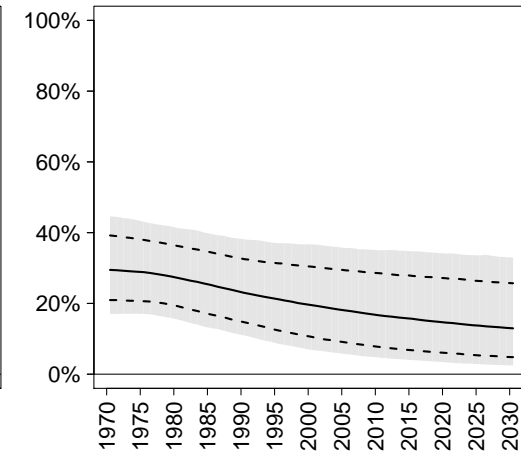

Total demand

Demand satisfied (any method)

Demand satisfied (modern methods)

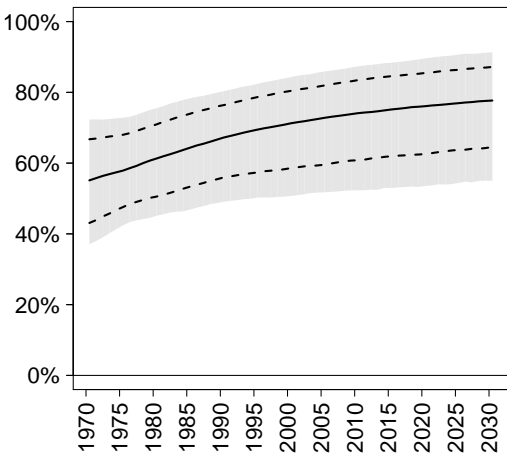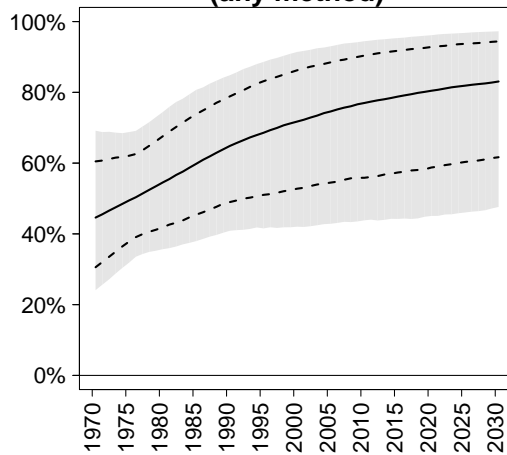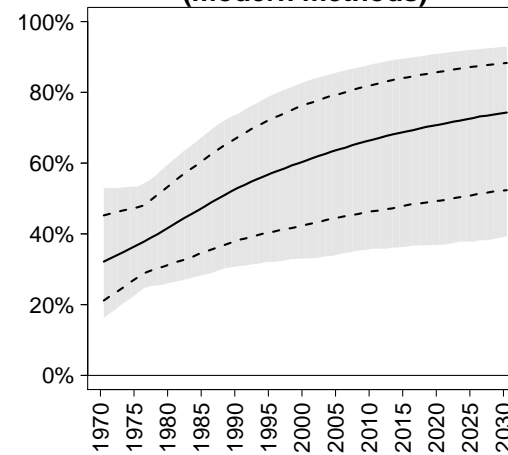

Guam (Micronesia) --- Married / In-Union

CP (any)

CP (modern)

CP (traditional)

Unmet need

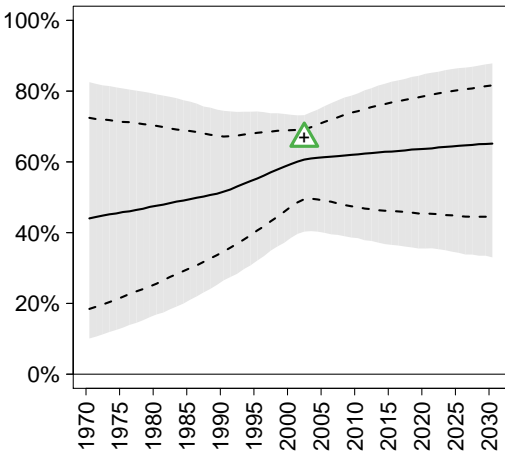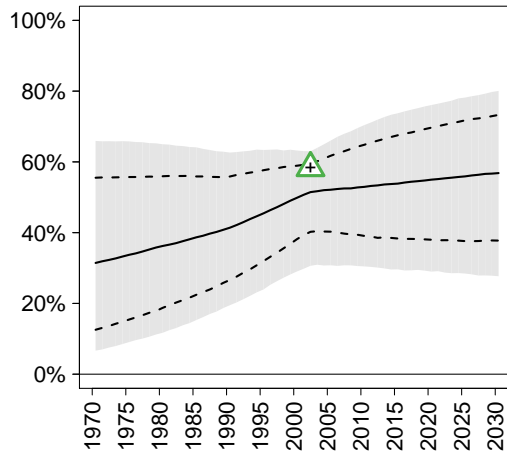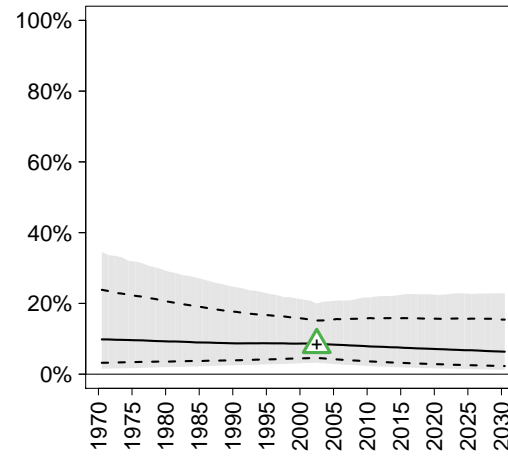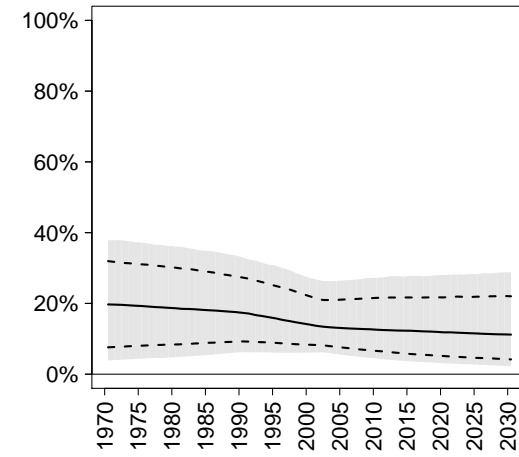

Total demand

Demand satisfied (any method)

Demand satisfied (modern methods)

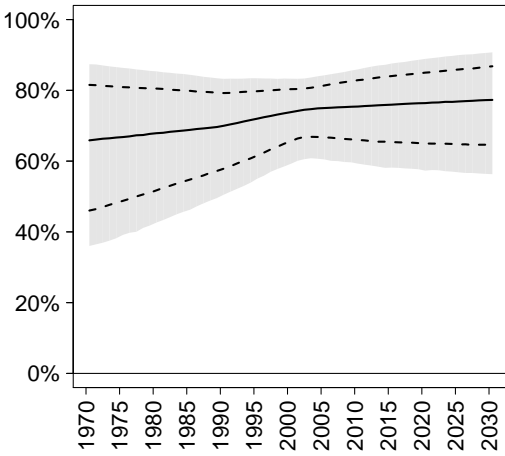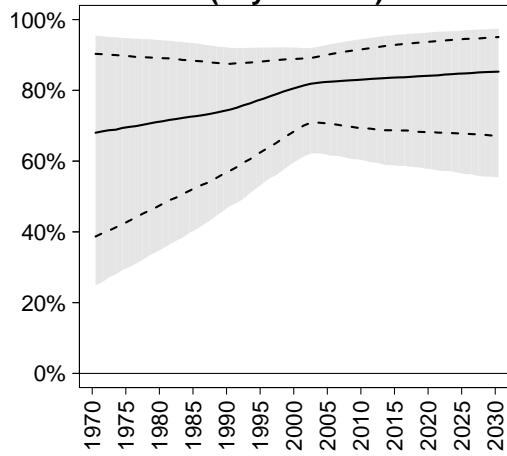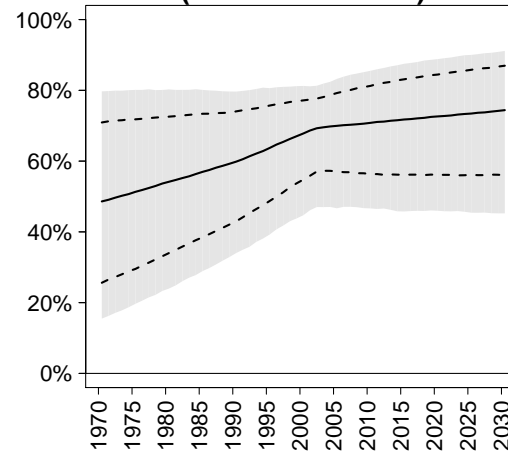

Guatemala (Central America) --- Married / In-Union

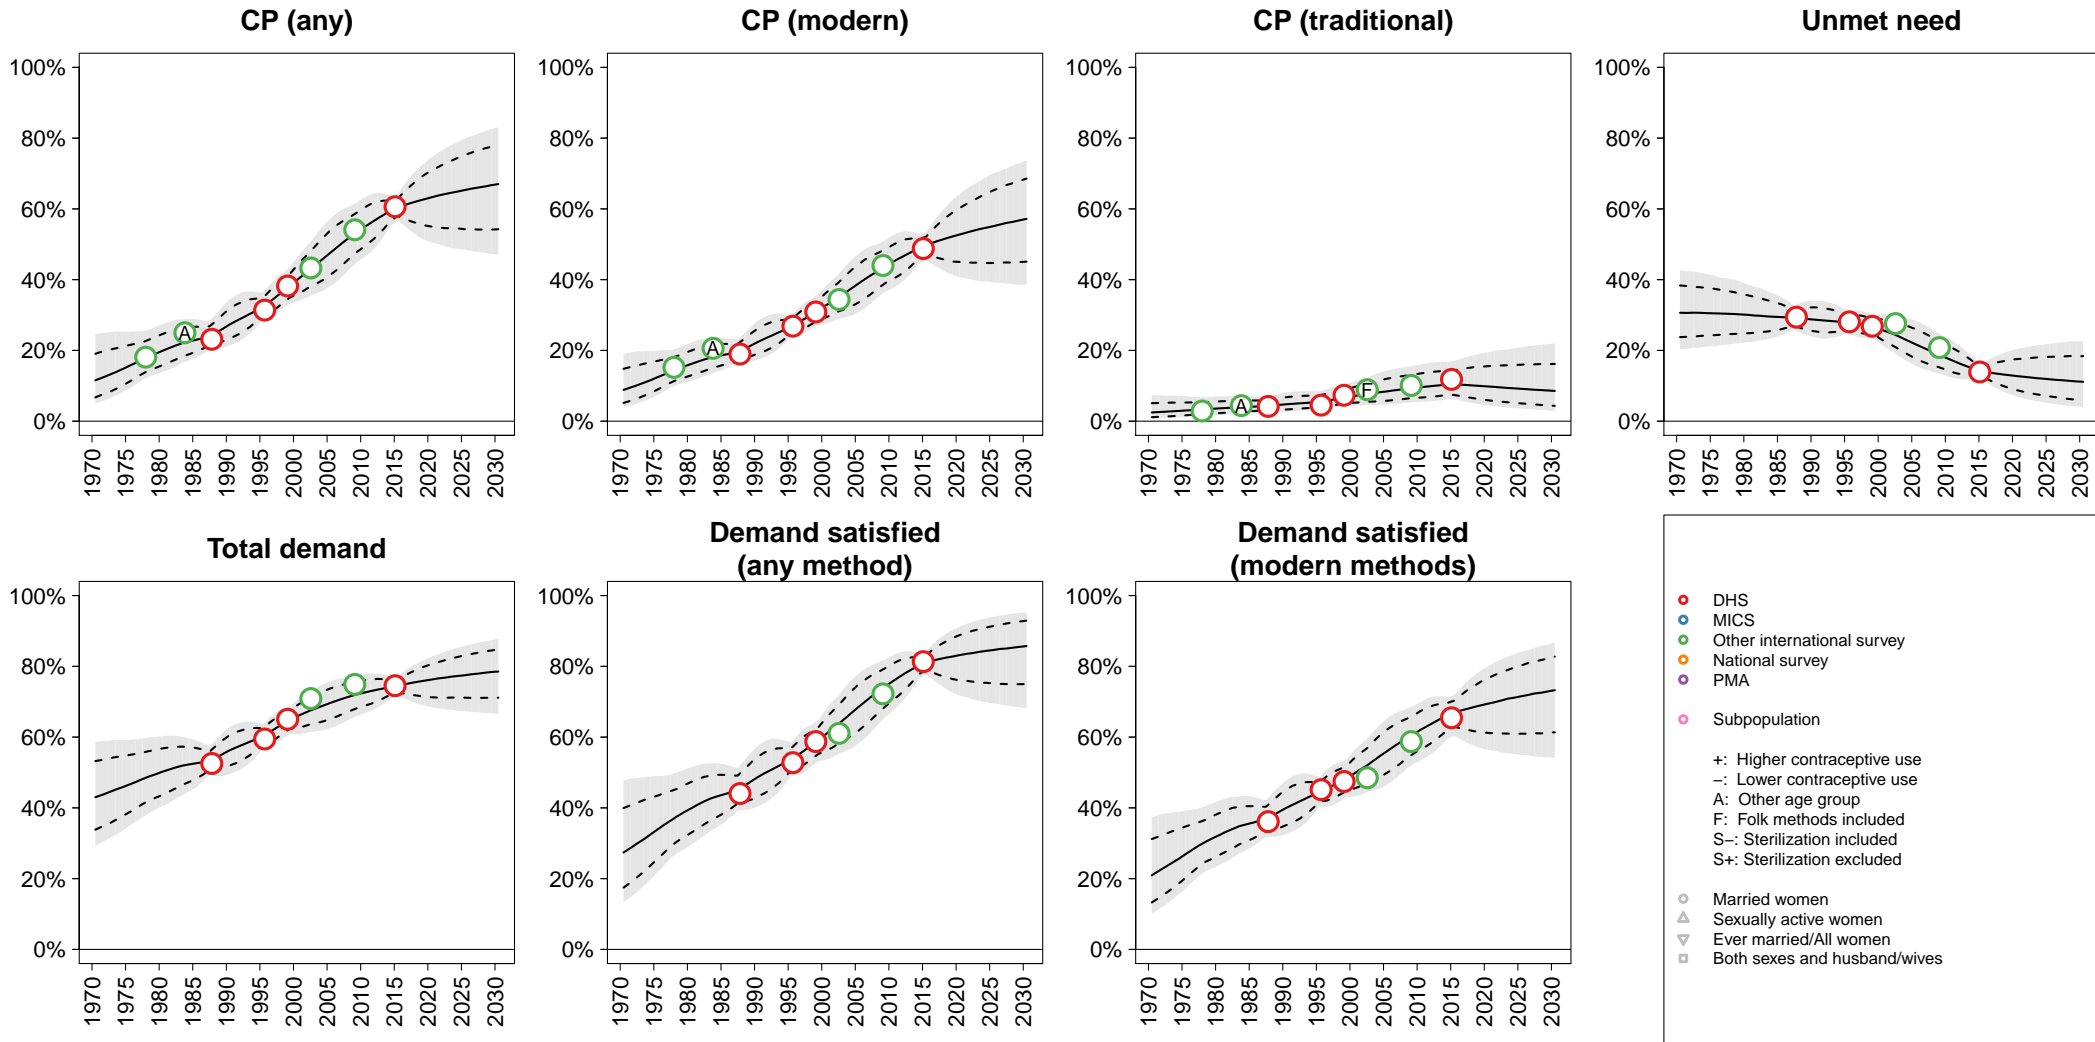

Guinea-Bissau (Western Africa) --- Married / In-Union

CP (any)

CP (modern)

CP (traditional)

Unmet need

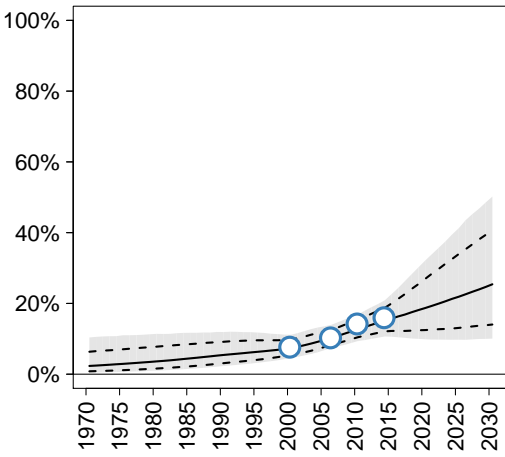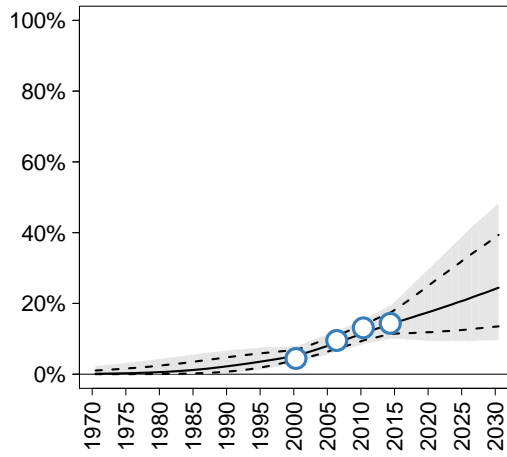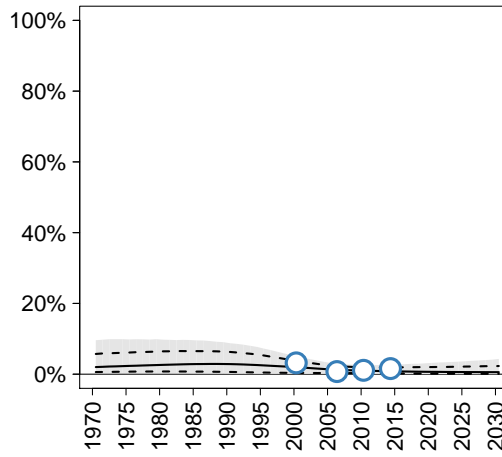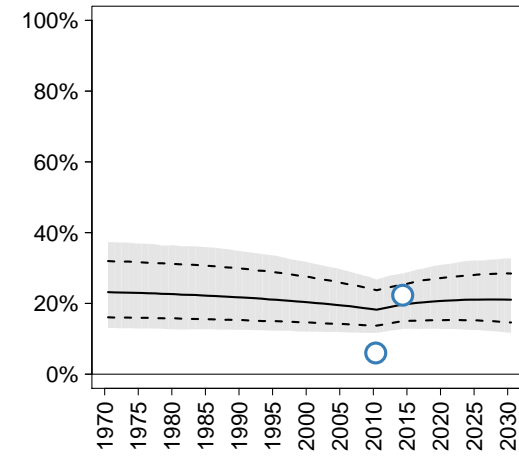

Total demand

Demand satisfied (any method)

Demand satisfied (modern methods)

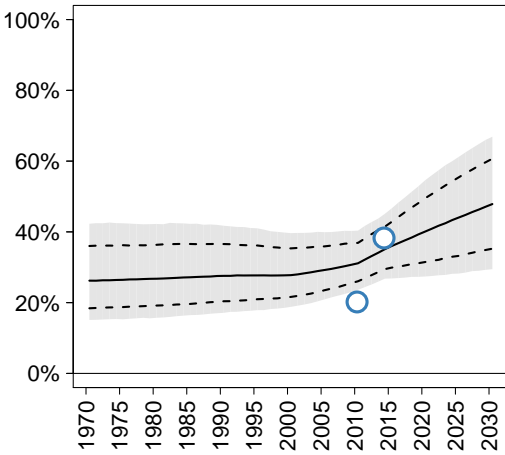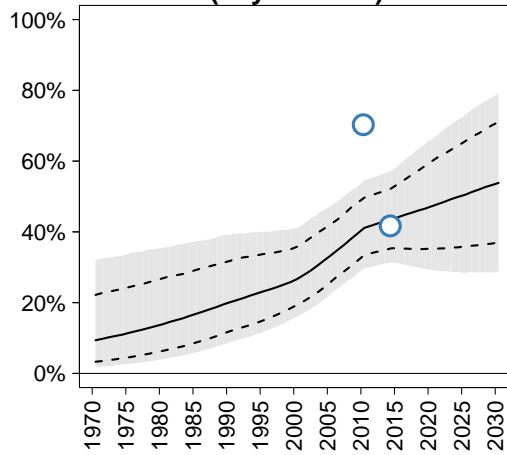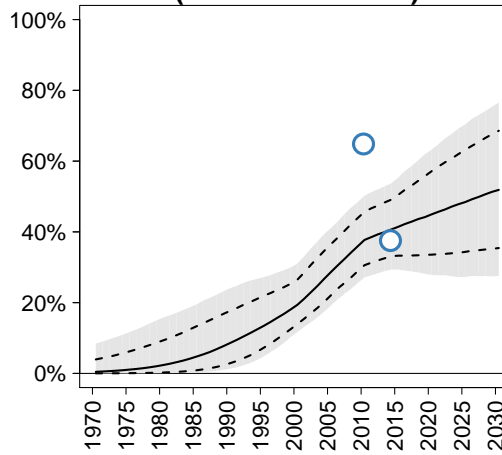

Guinea (Western Africa) --- Married / In-Union

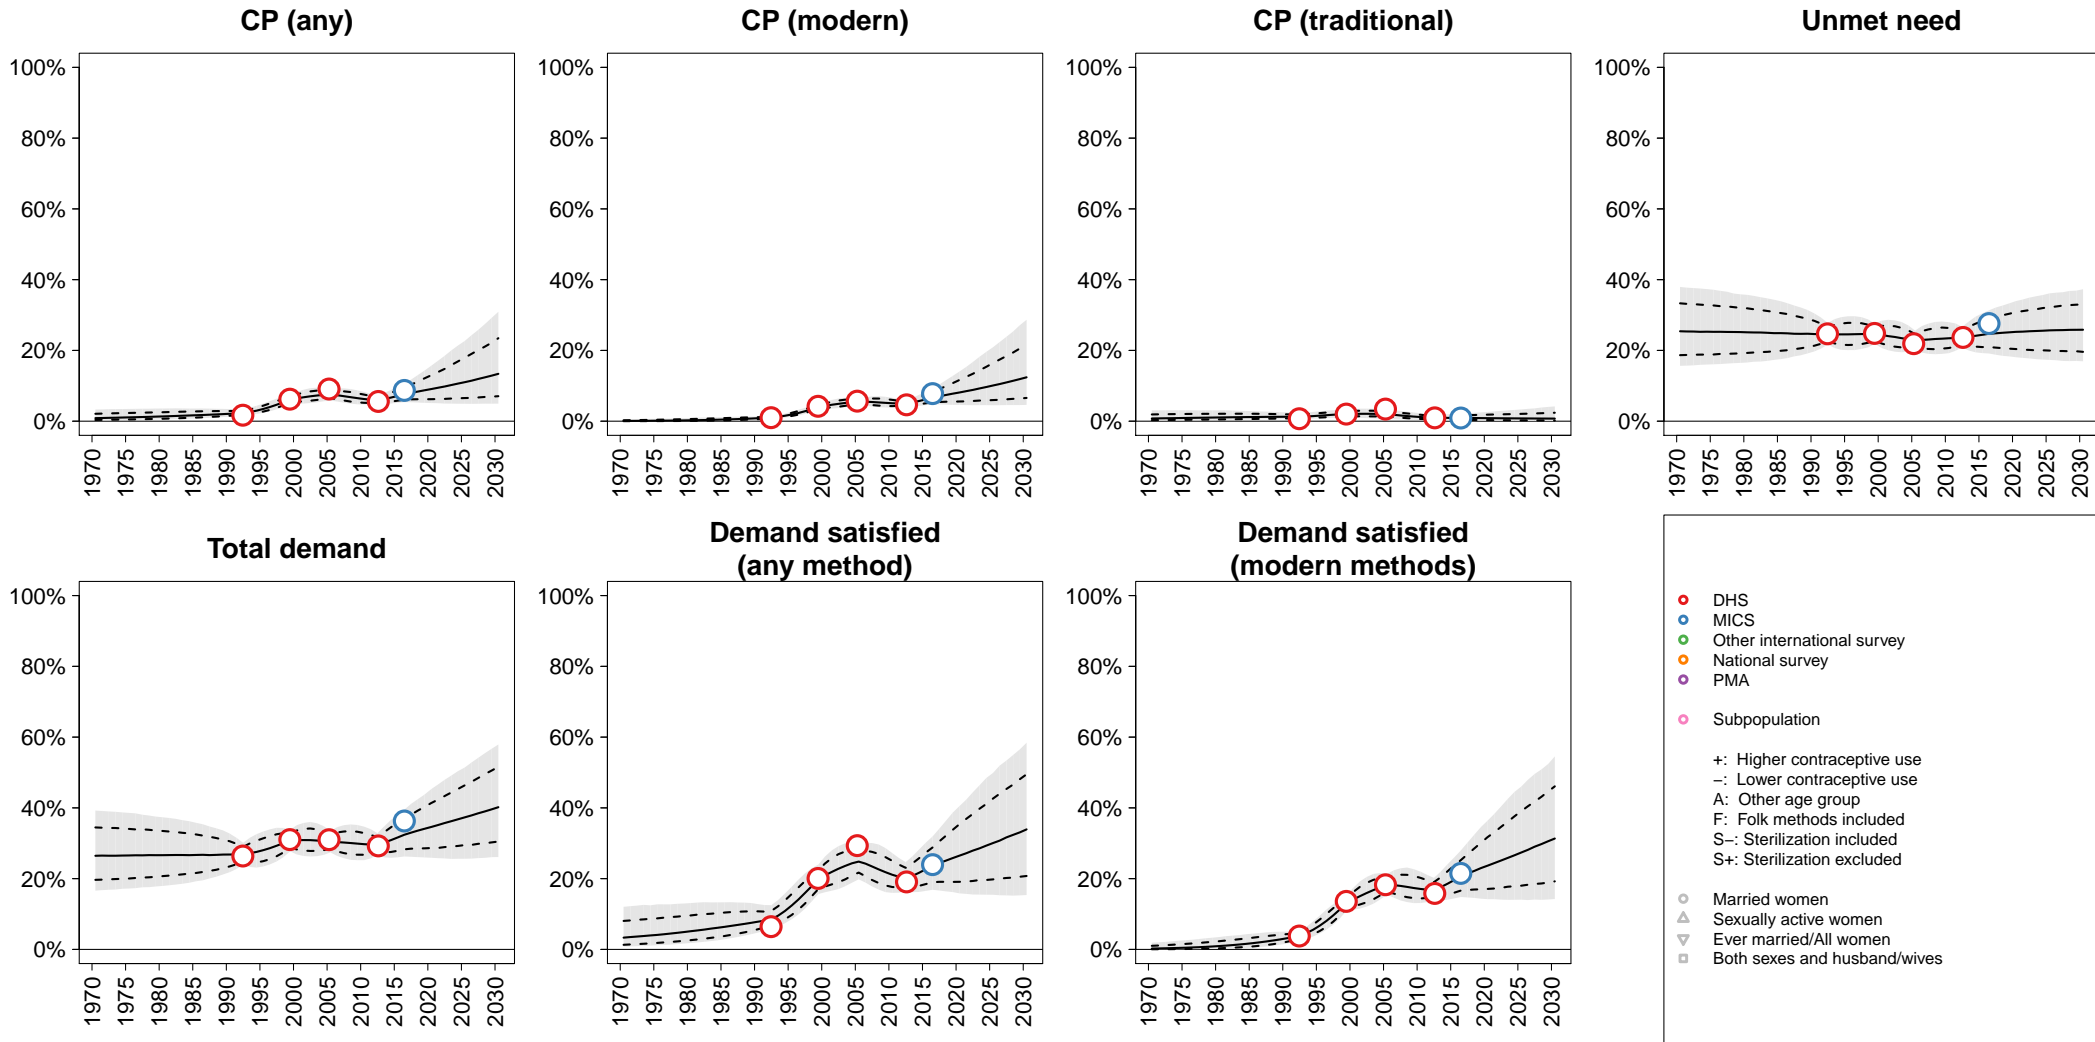

Guyana (South America) --- Married / In-Union

CP (any)

CP (modern)

CP (traditional)

Unmet need

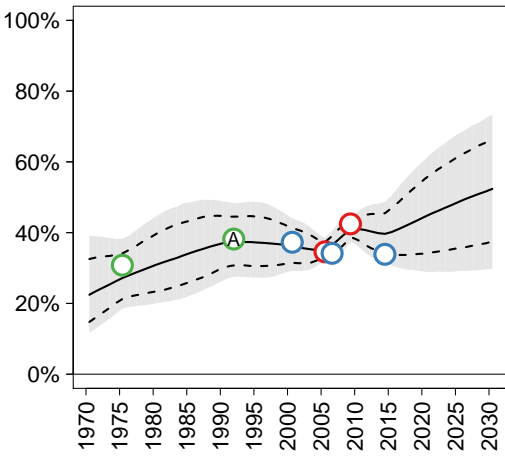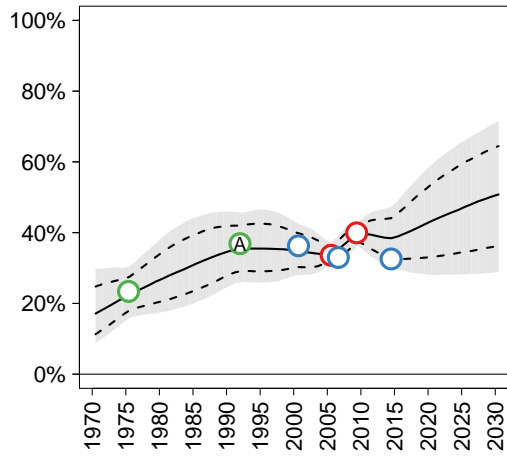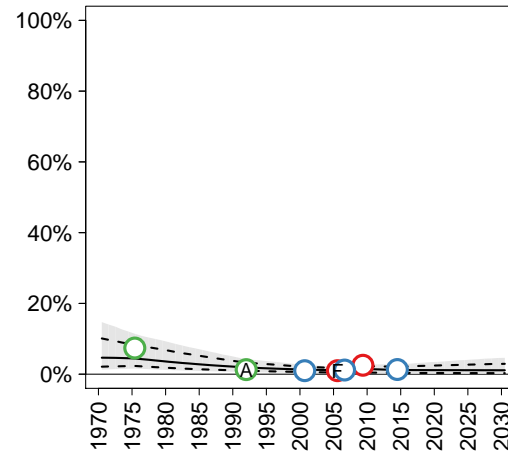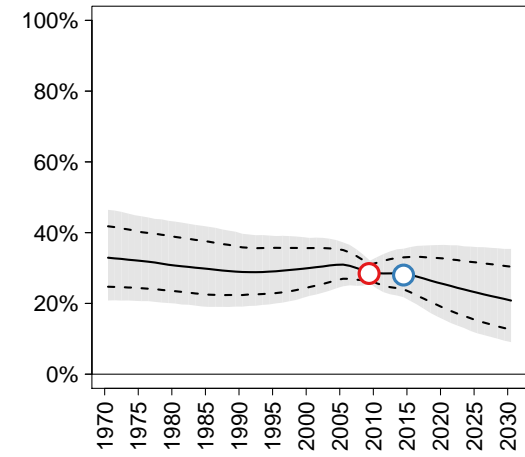

Total demand

Demand satisfied (any method)

Demand satisfied (modern methods)

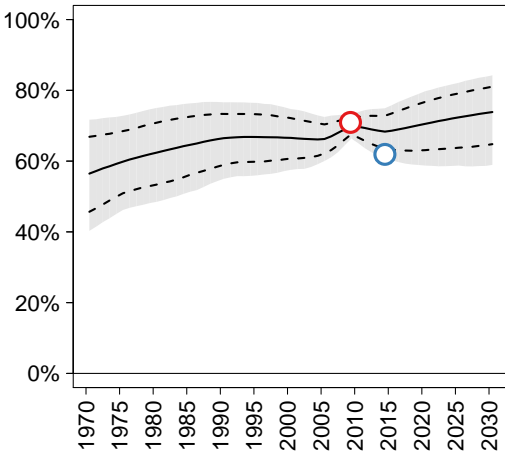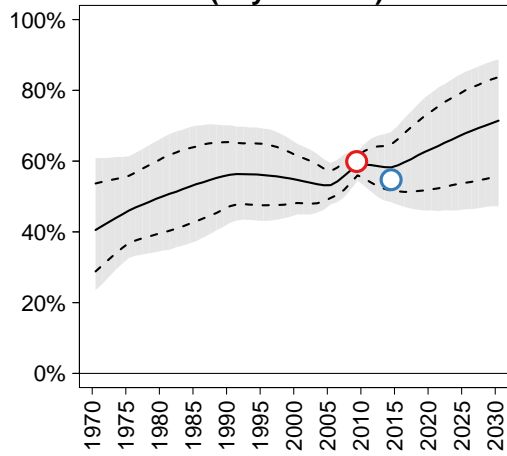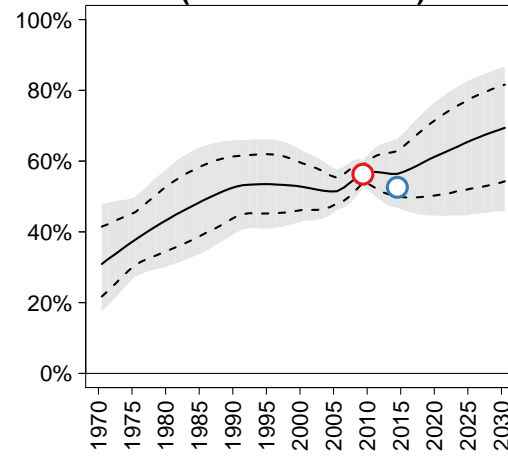



Haiti (Caribbean) --- Married / In-Union

CP (any)

CP (modern)

CP (traditional)

Unmet need

Total demand

Demand satisfied (any method)

Demand satisfied (modern methods)

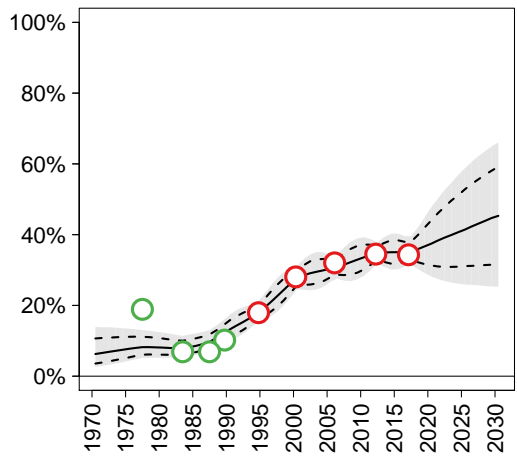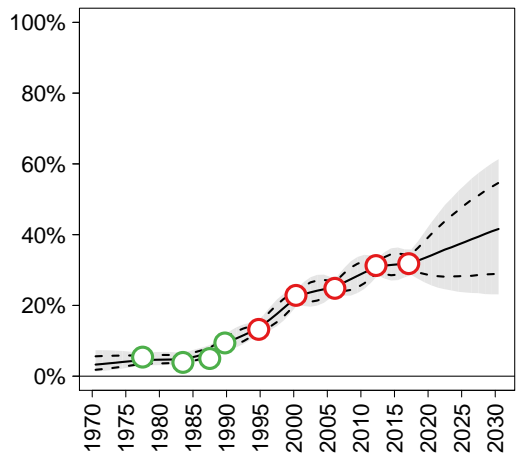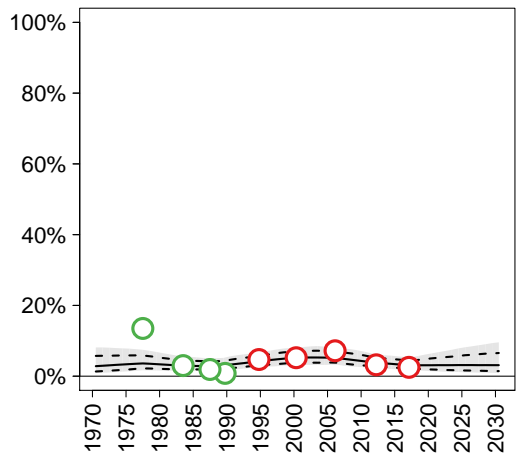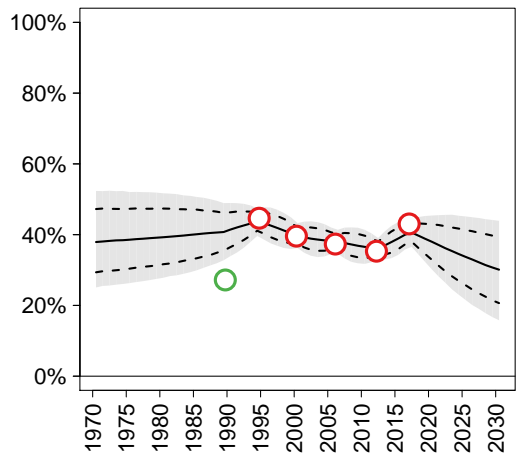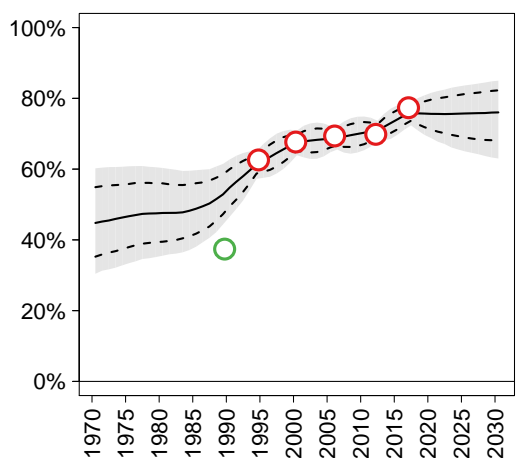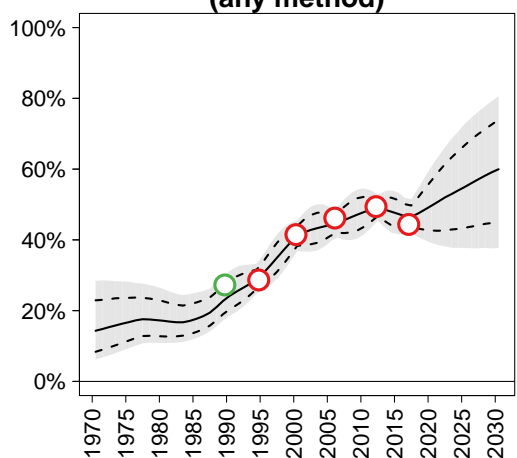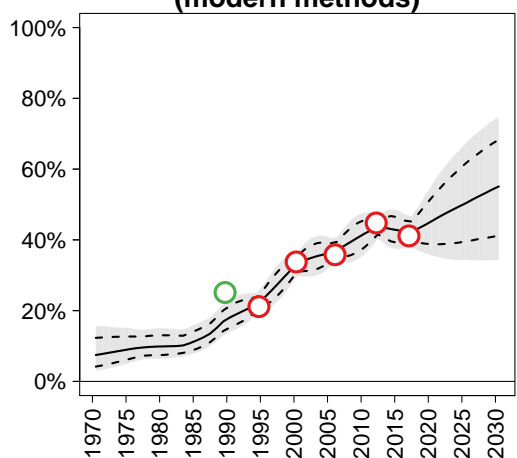

Honduras (Central America) --- Married / In-Union

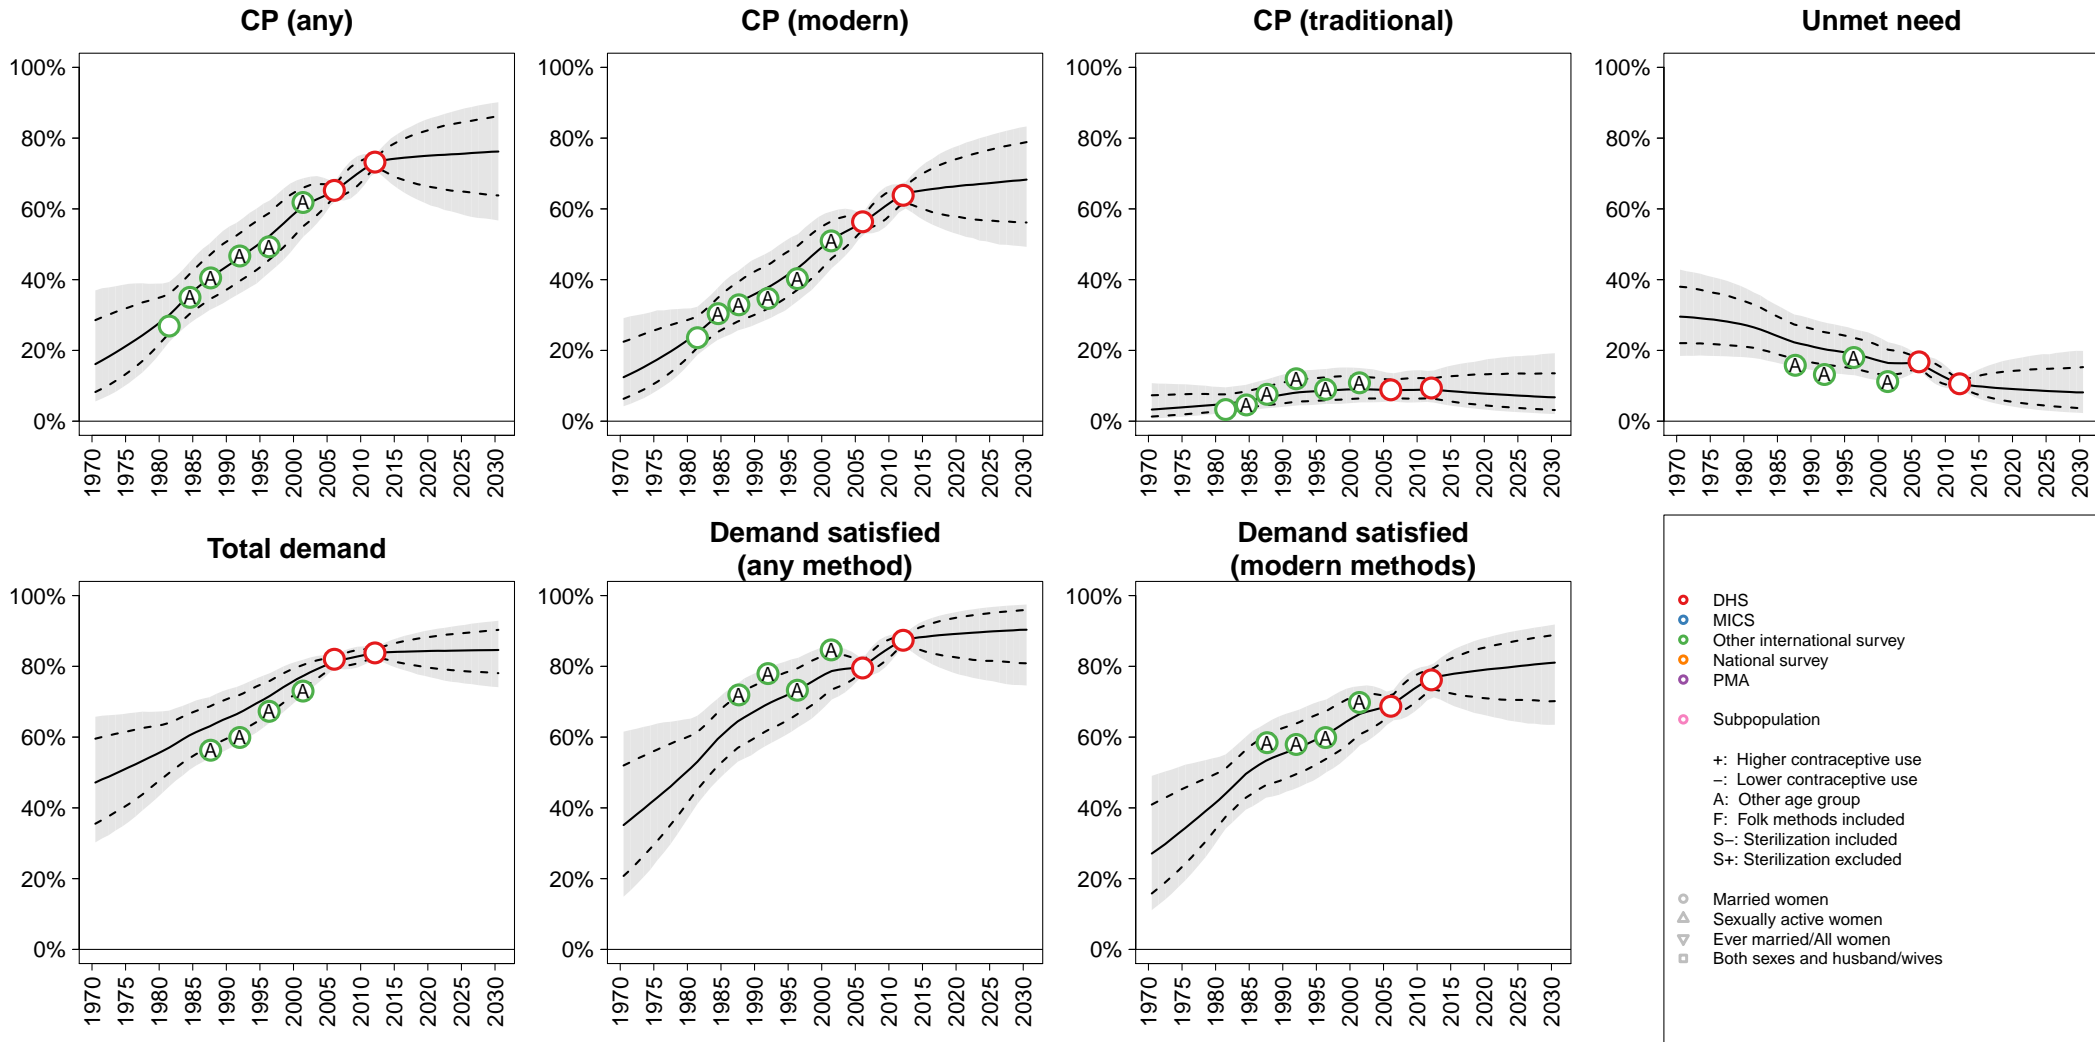

Hungary (Eastern Europe) --- Married / In-Union

CP (any)

CP (modern)

CP (traditional)

Unmet need

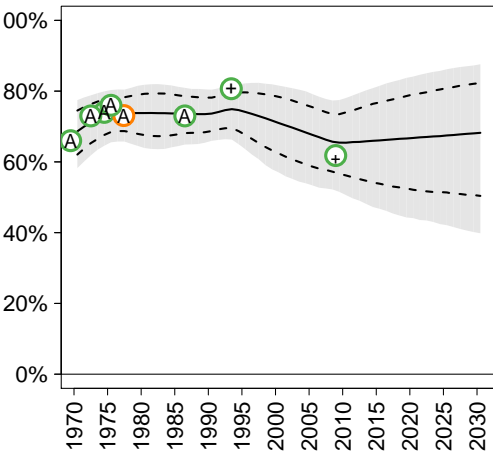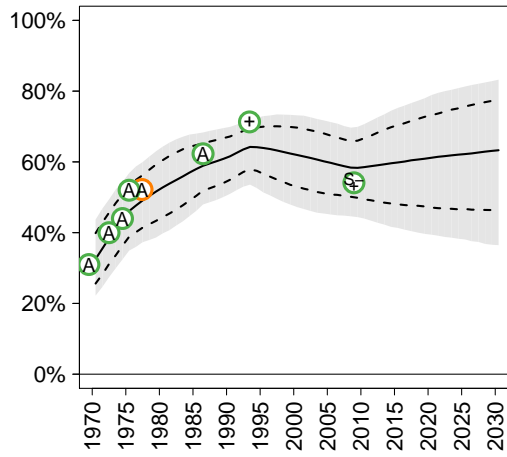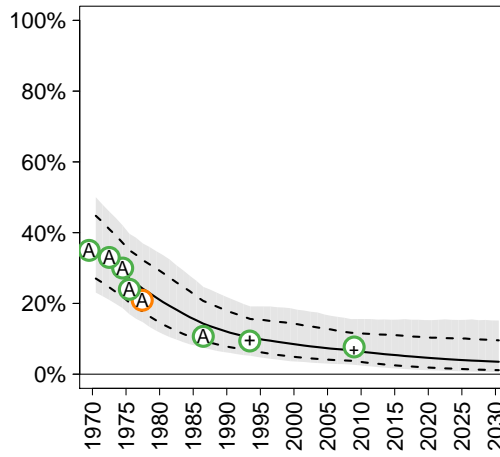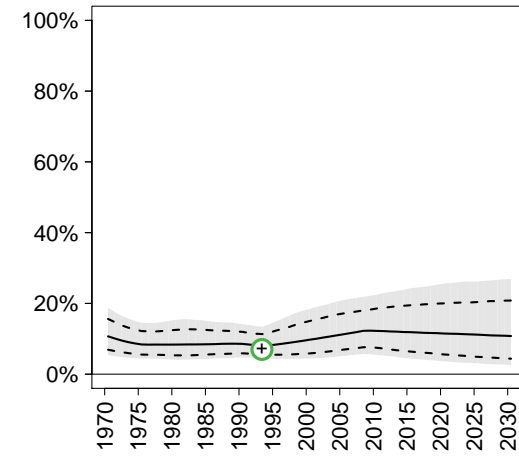

Total demand

Demand satisfied (any method)

Demand satisfied (modern methods)

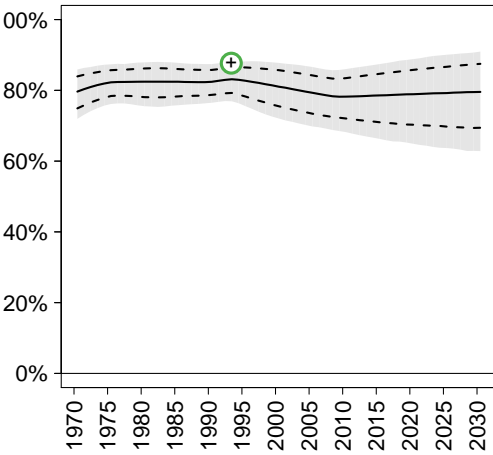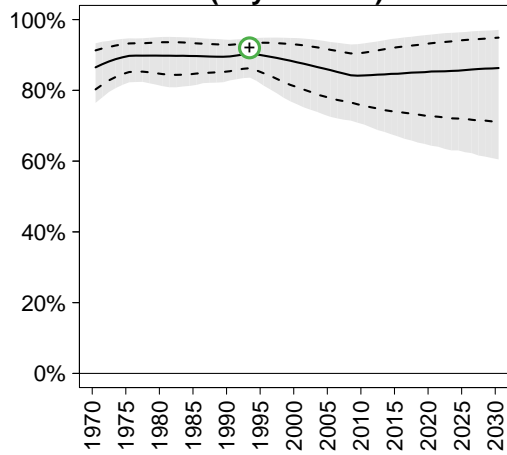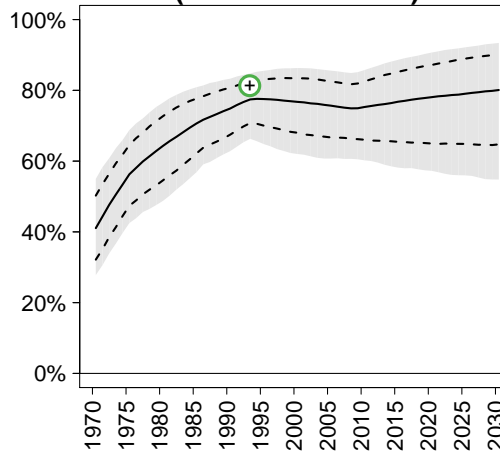

India (Southern Asia) --- Married / In-Union

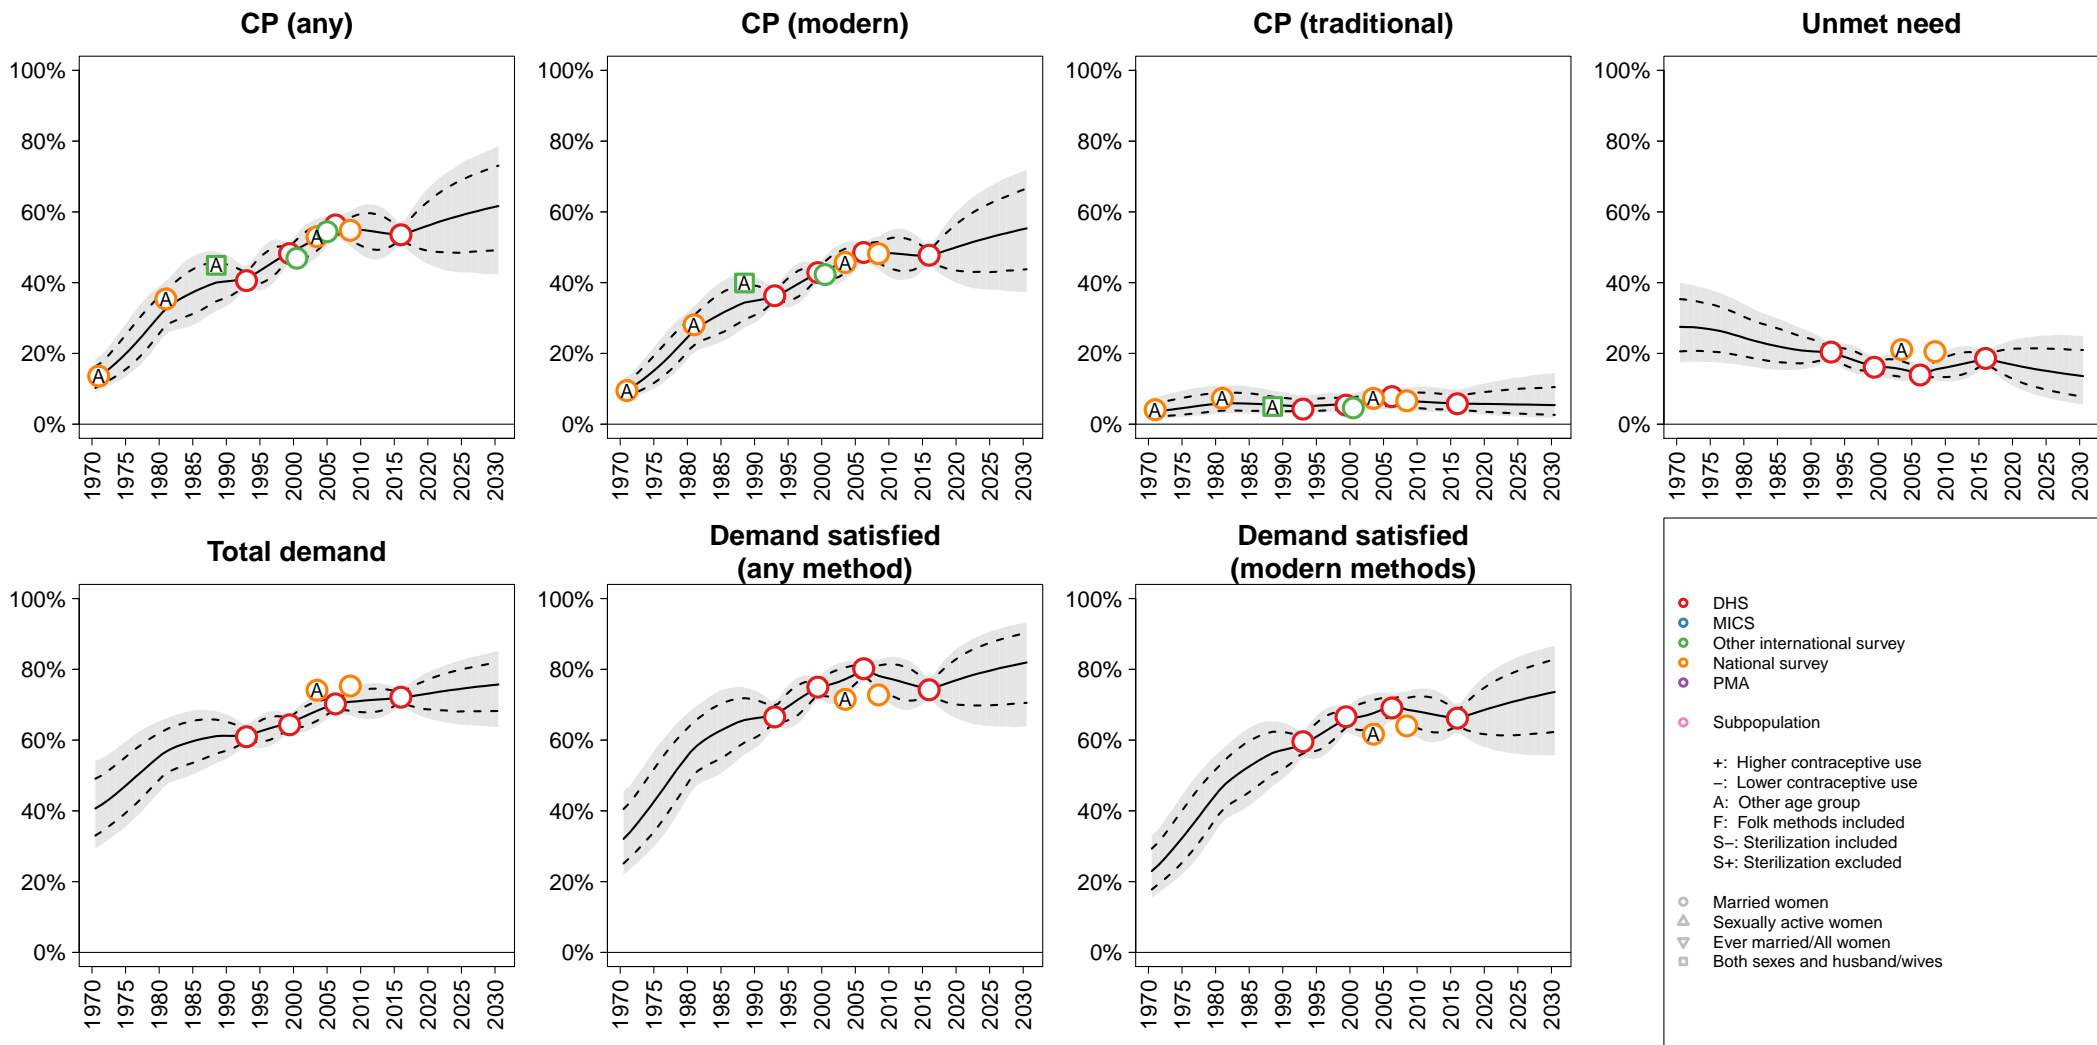

Indonesia (South-eastern Asia) --- Married / In-Union

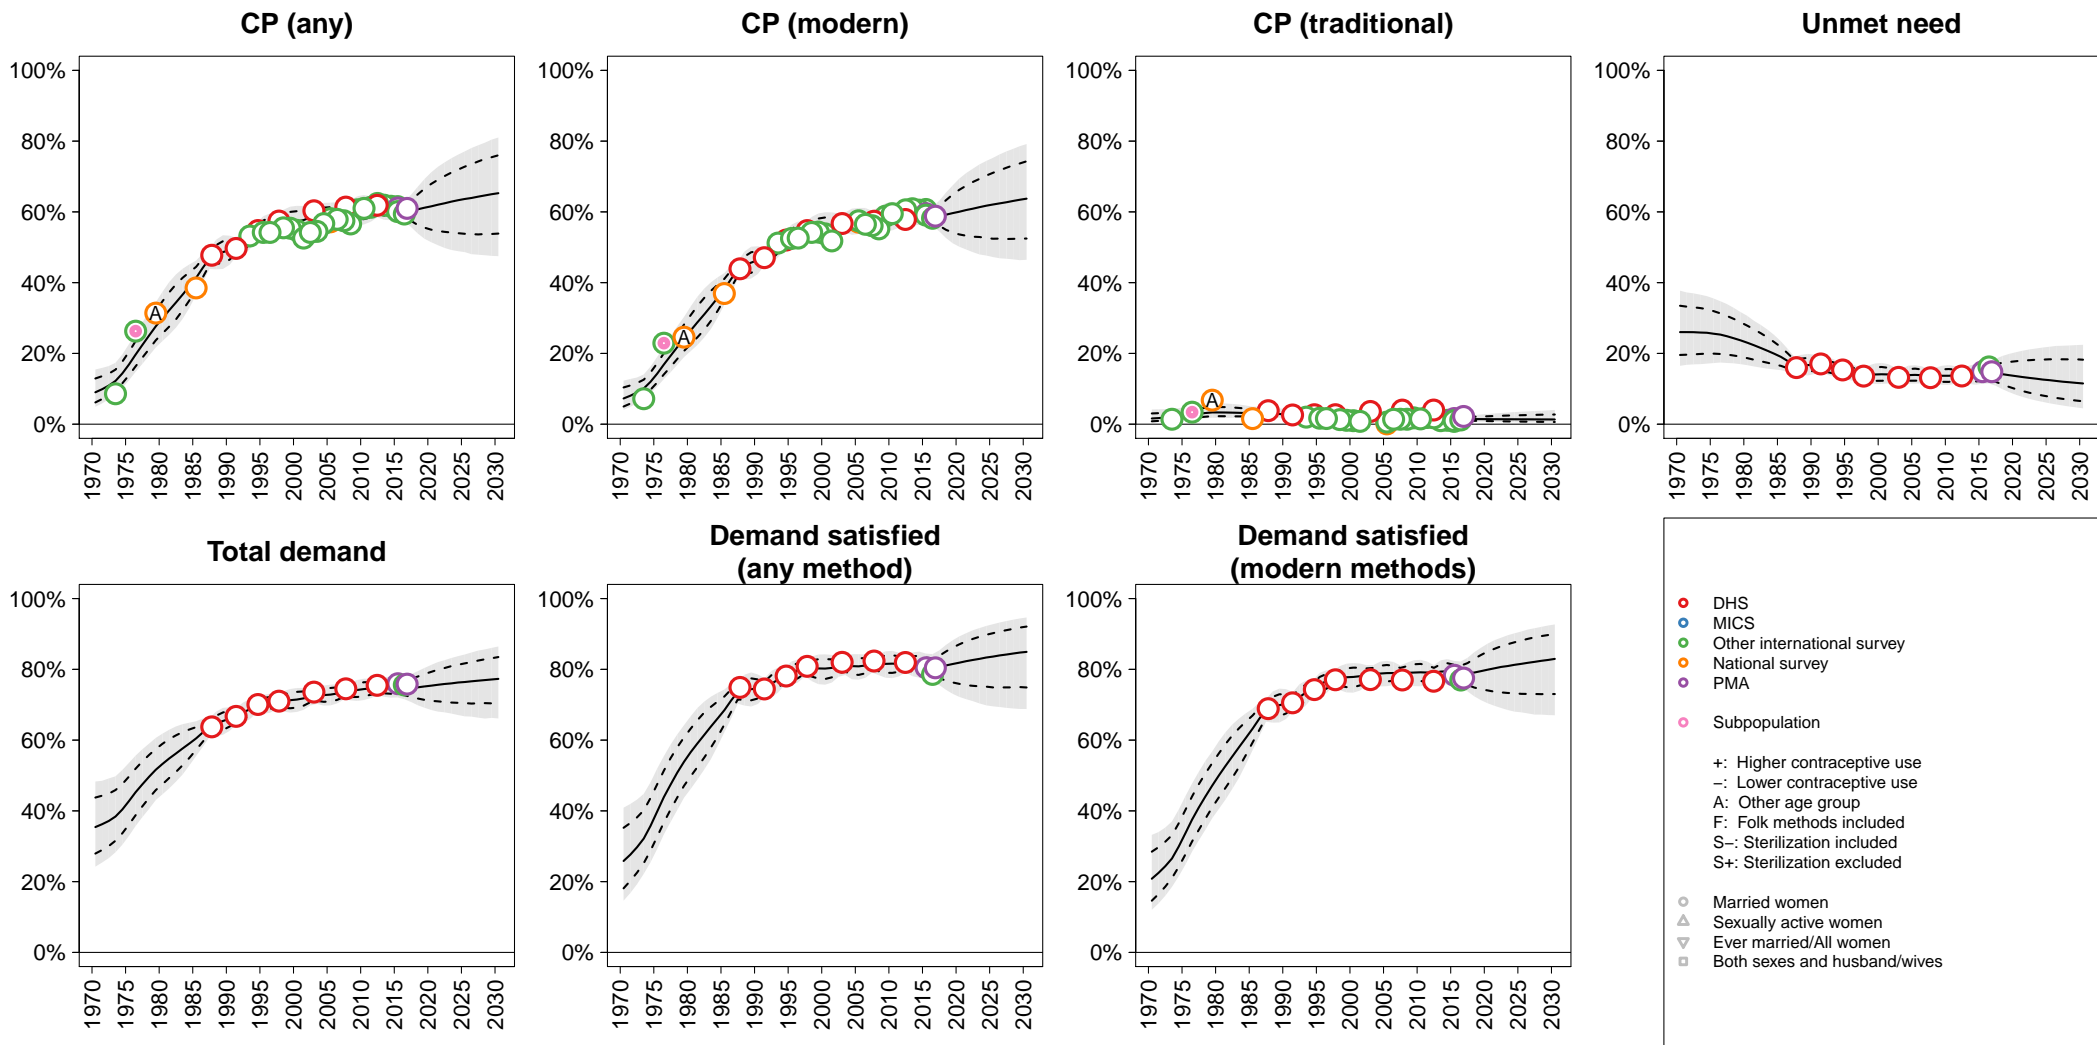

Iran, Islamic Republic of (Southern Asia) --- Married / In-Union

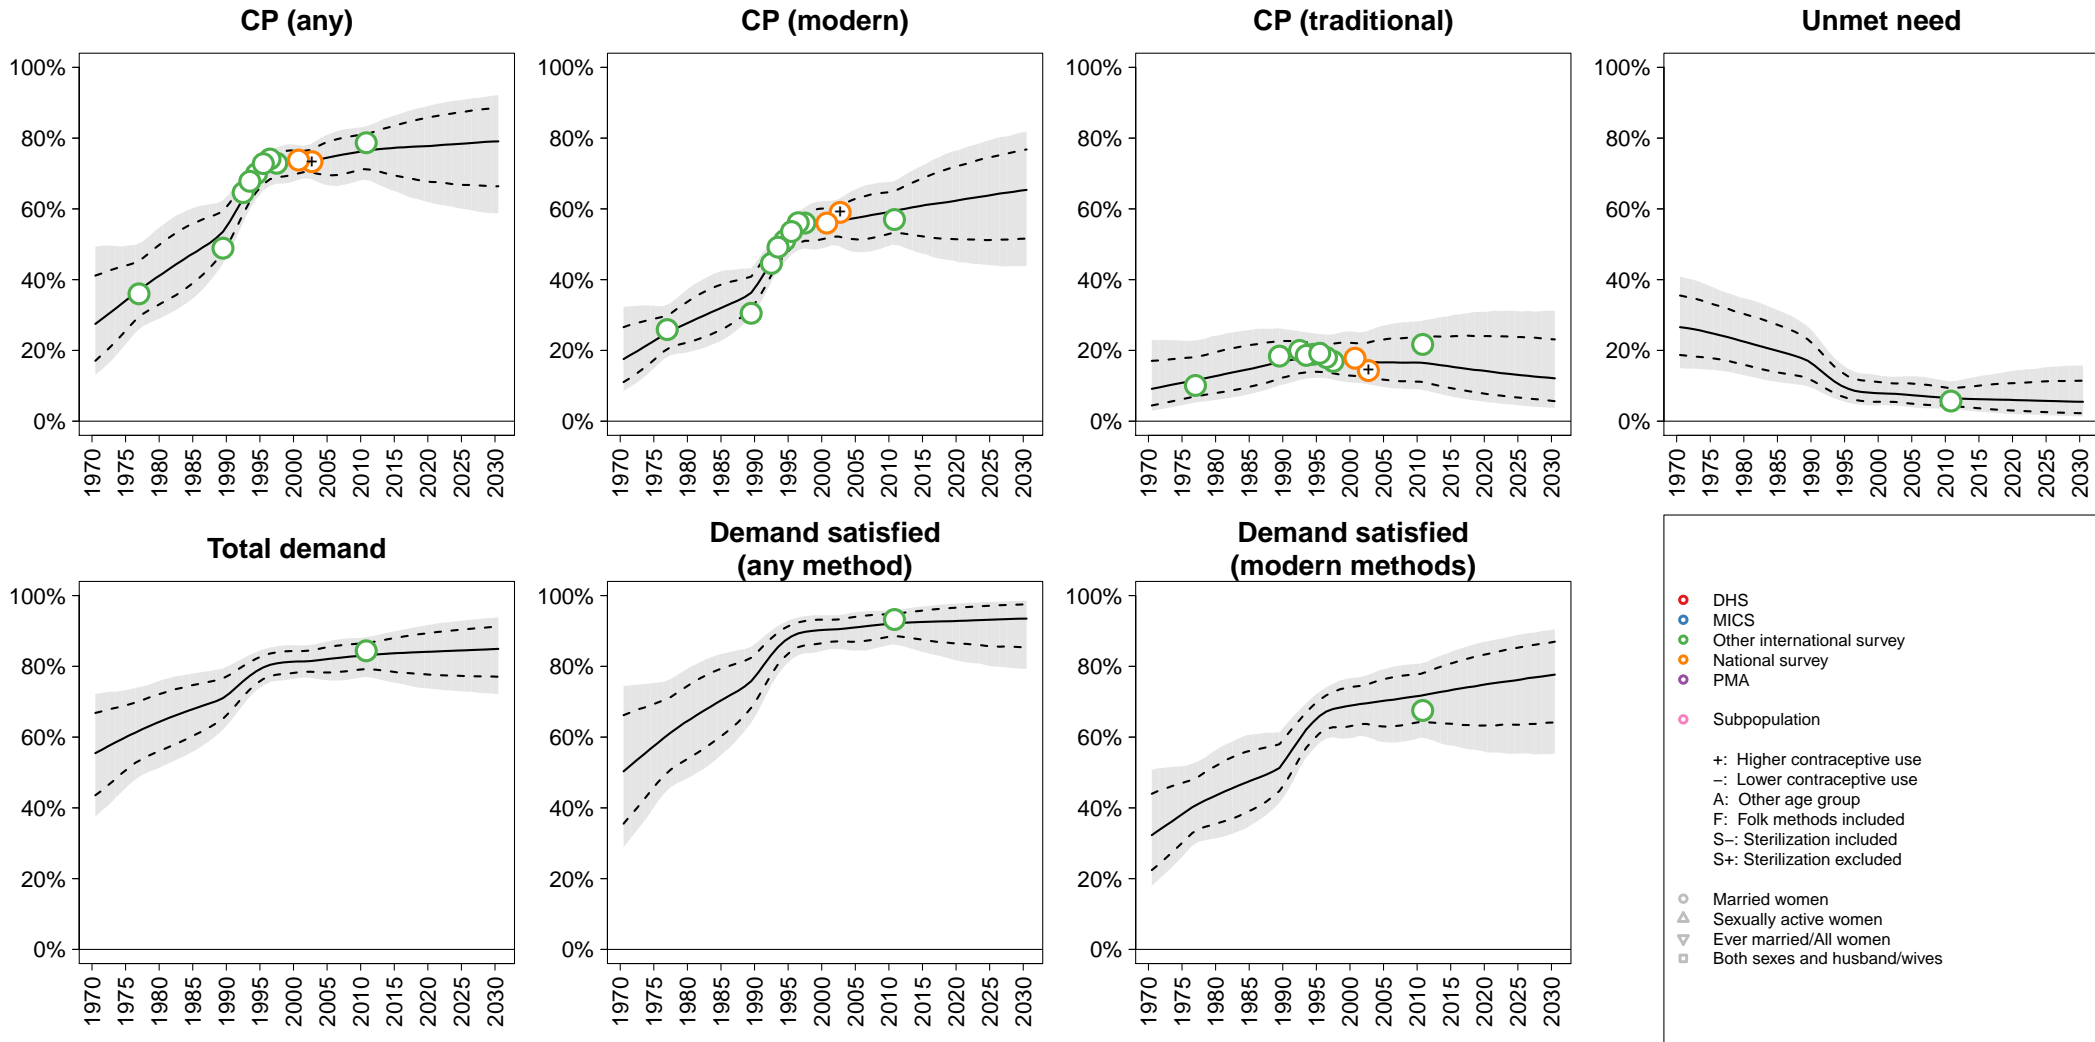

Iraq (Western Asia) --- Married / In-Union

CP (any)

CP (modern)

CP (traditional)

Unmet need

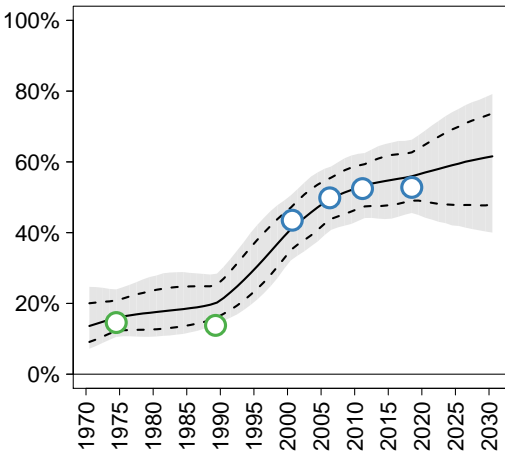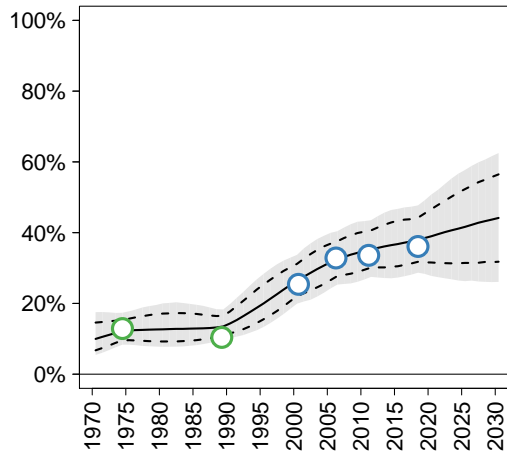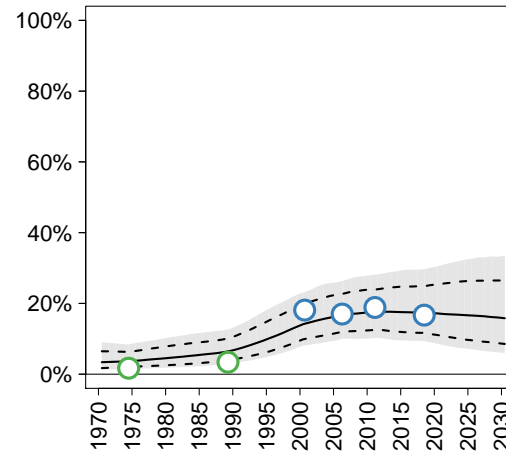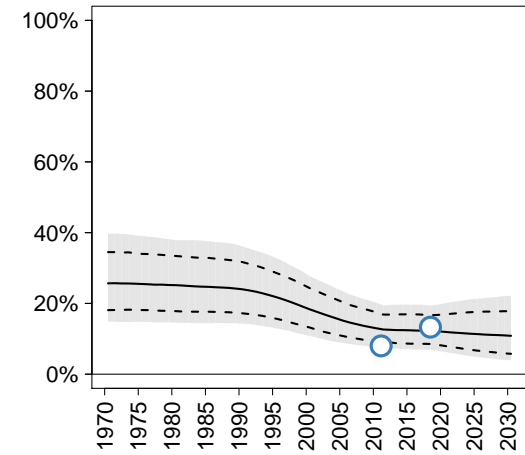

Total demand

Demand satisfied (any method)

Demand satisfied (modern methods)

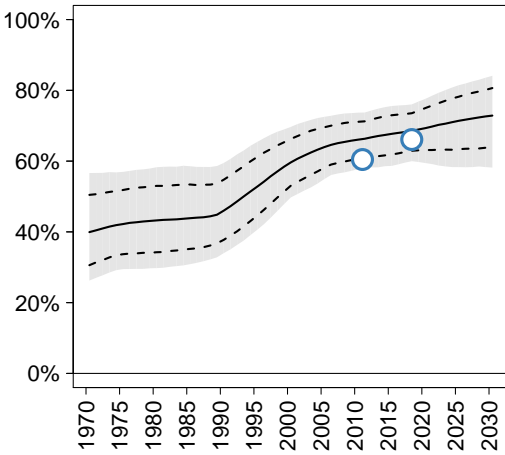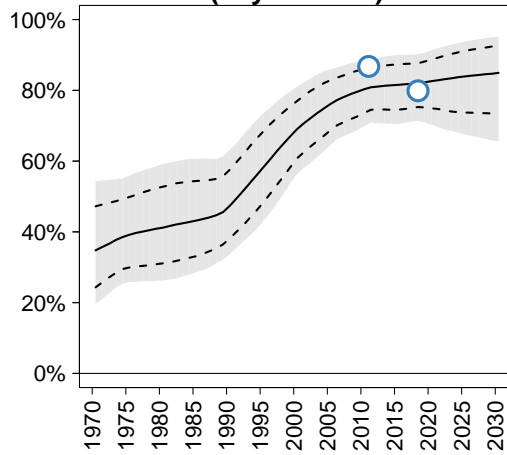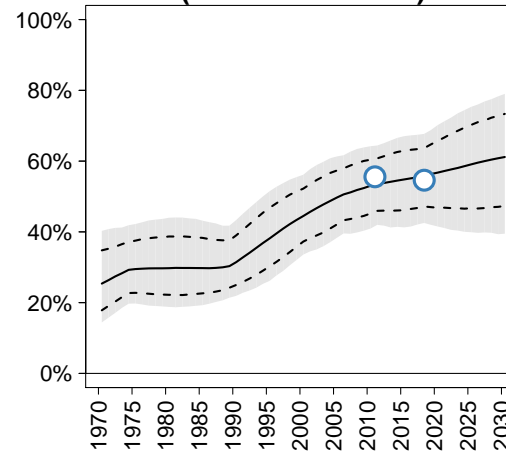

Ireland (Northern Europe) --- Married / In-Union

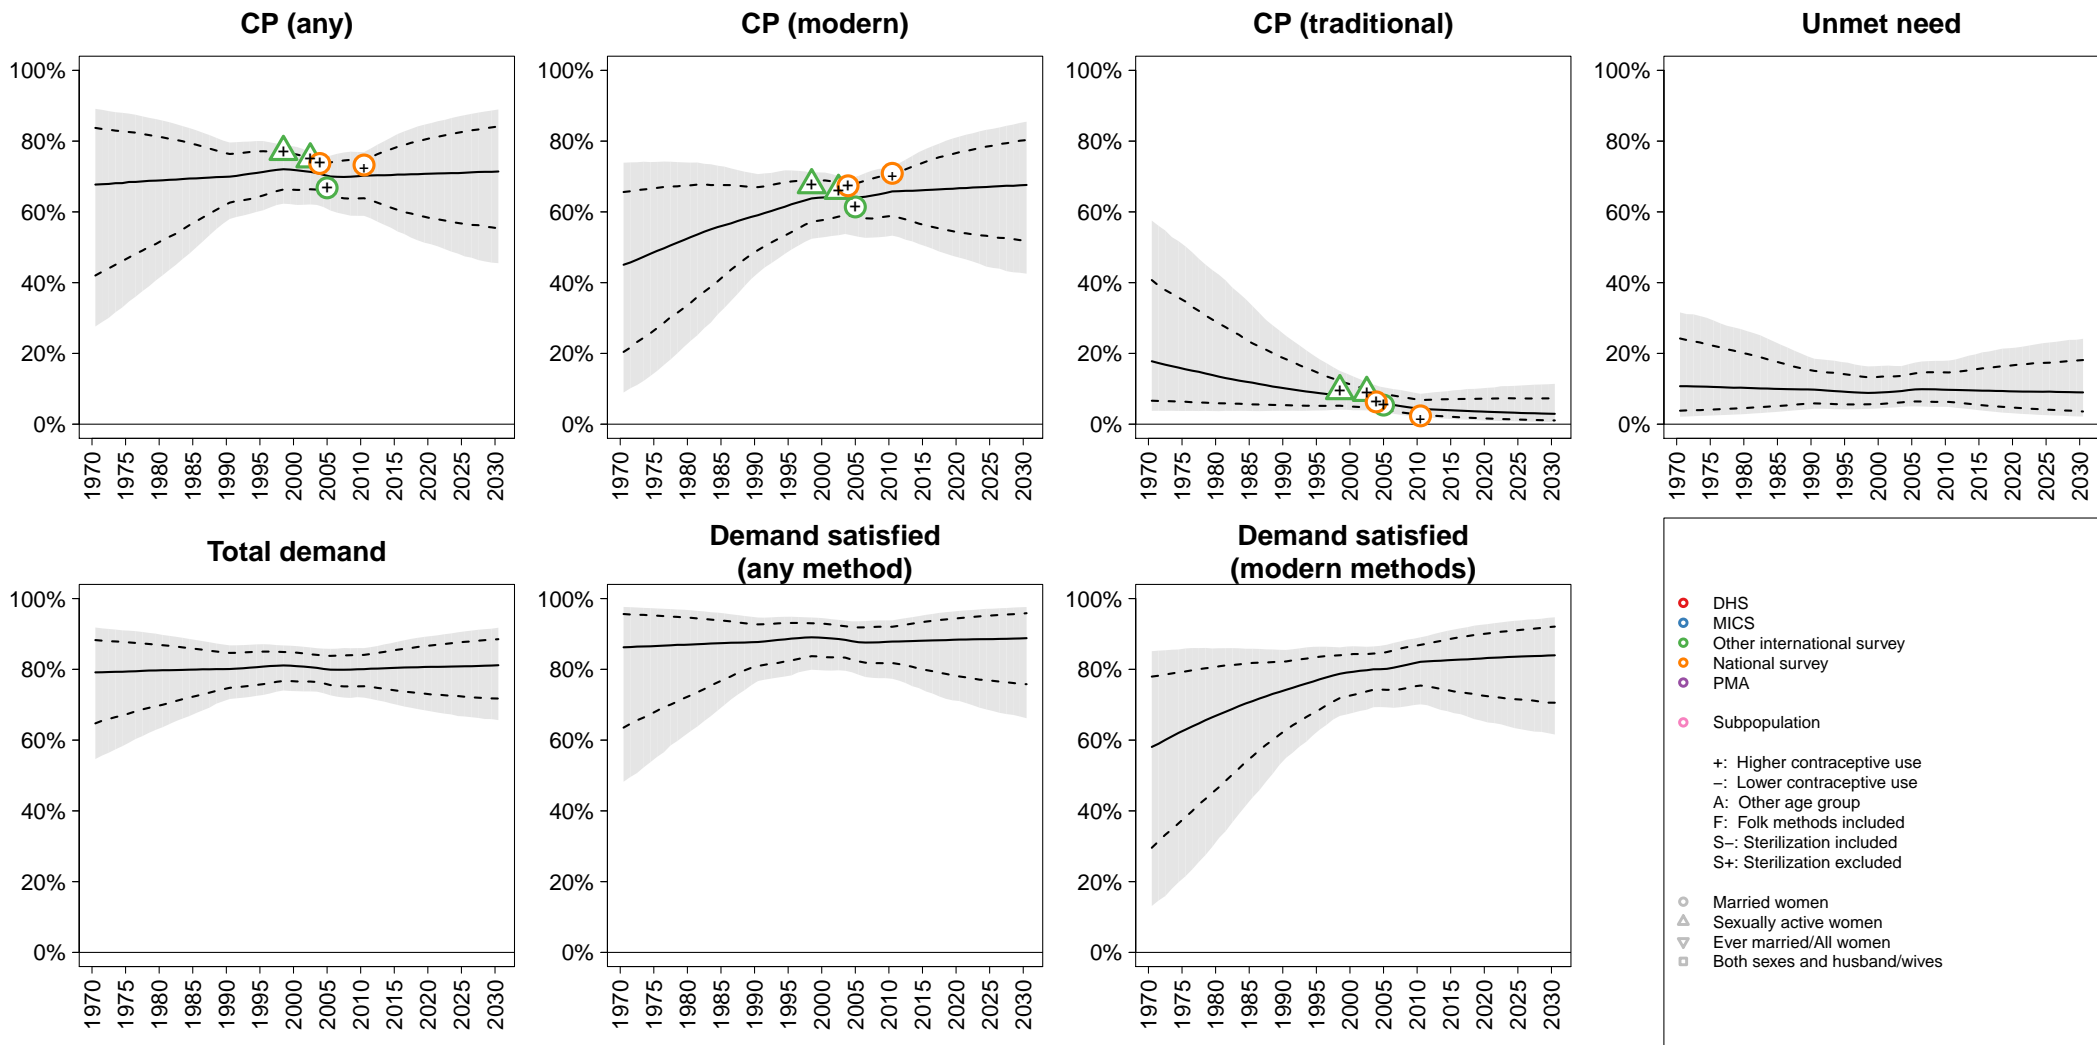



Israel (Western Asia) --- Married / In-Union

CP (any)

CP (modern)

CP (traditional)

Unmet need

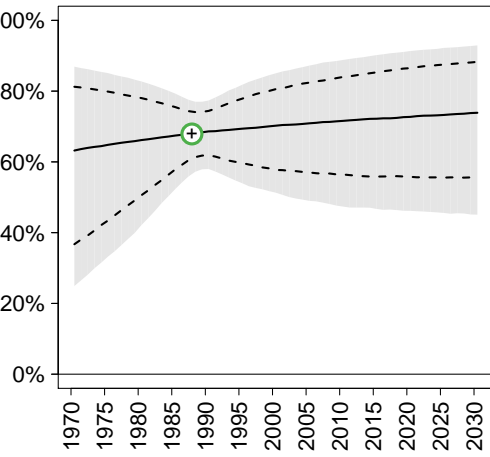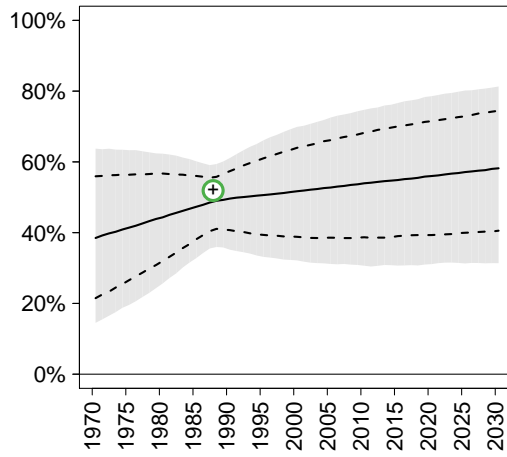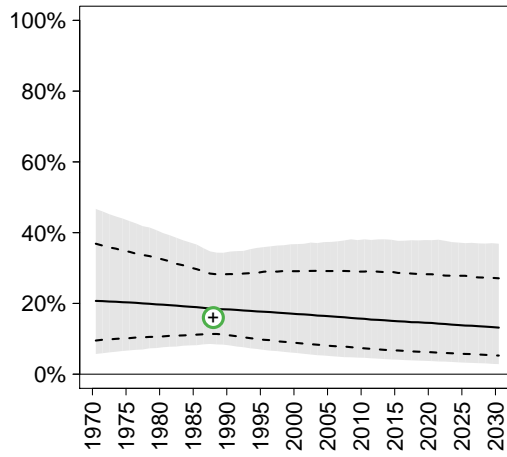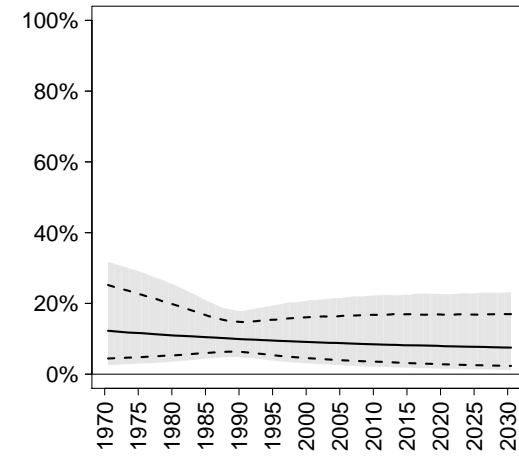

Total demand

Demand satisfied (any method)

Demand satisfied (modern methods)

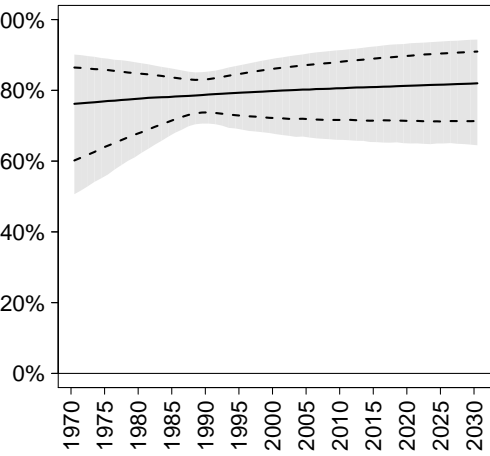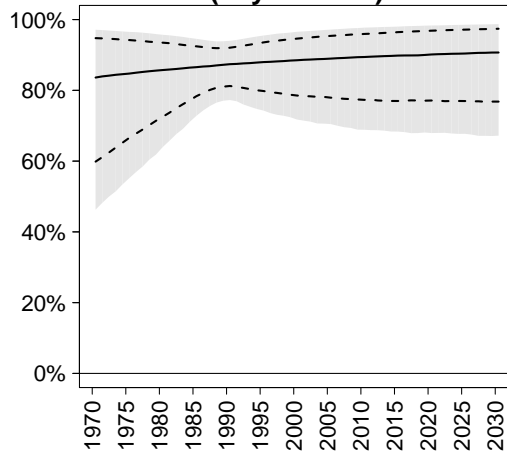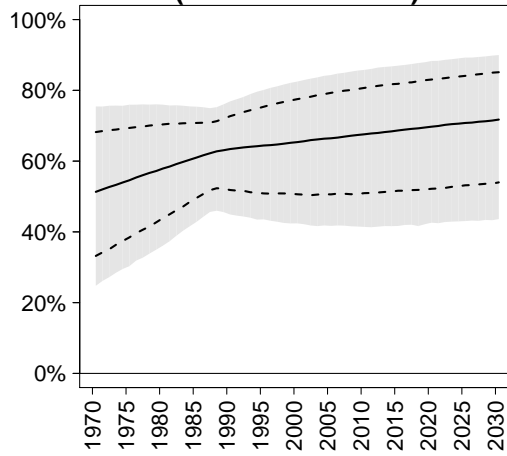

- DHS
- MICS
- Other international survey
- National survey
- PMA
- Subpopulation
- + : Higher contraceptive use
- : Lower contraceptive use
- A : Other age group
- F : Folk methods included
- S- : Sterilization included
- S+ : Sterilization excluded
- Married women
- △ Sexually active women
- ▽ Ever married/All women
- Both sexes and husband/wives

Italy (Southern Europe) --- Married / In-Union

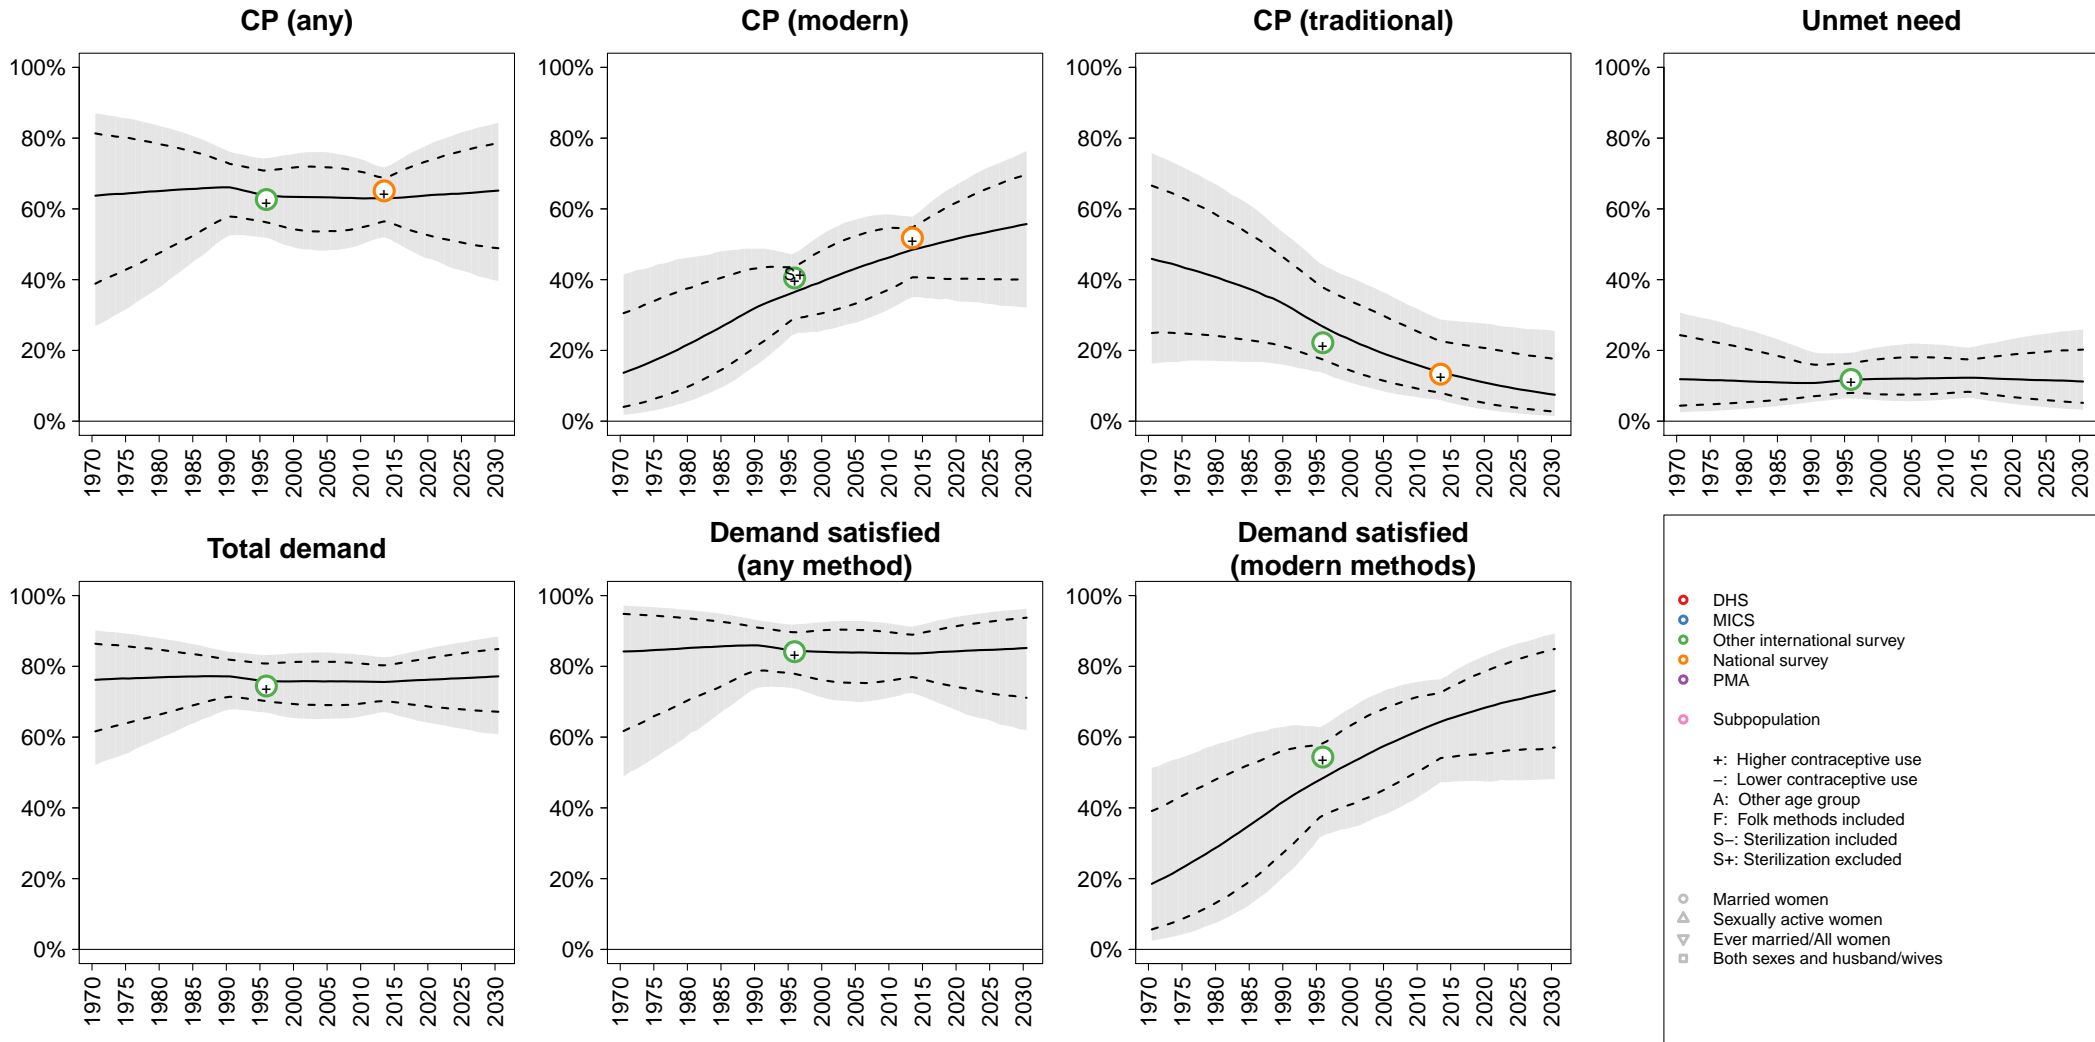

Jamaica (Caribbean) --- Married / In-Union

CP (any)

CP (modern)

CP (traditional)

Unmet need

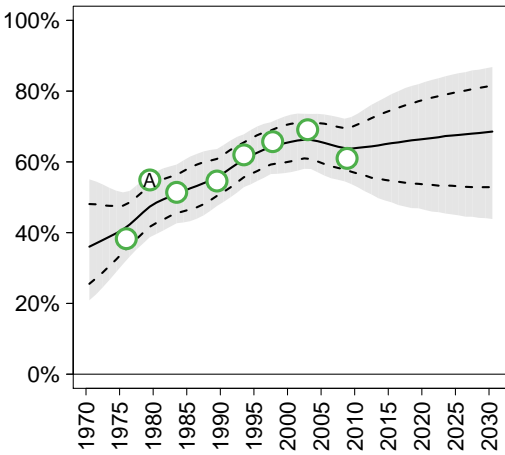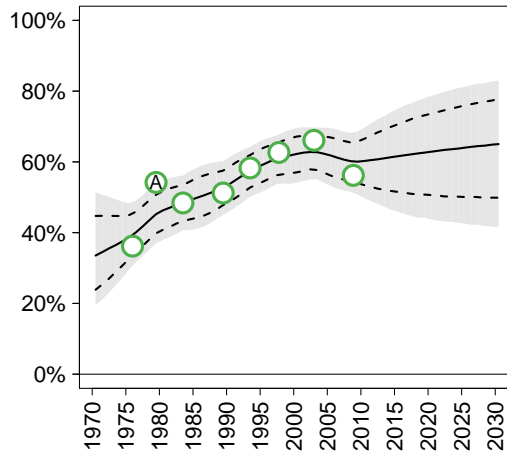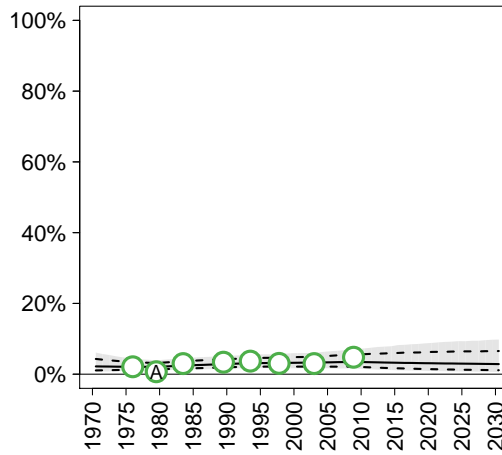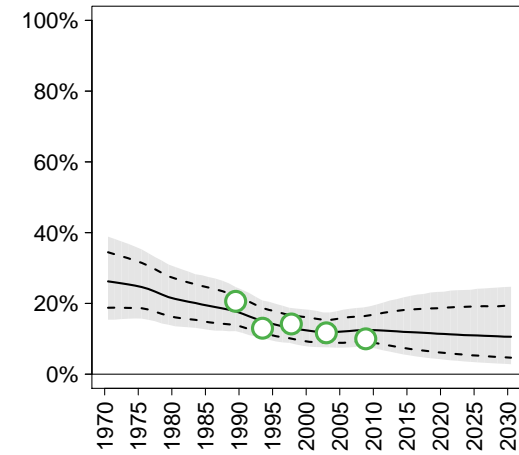

Total demand

Demand satisfied (any method)

Demand satisfied (modern methods)

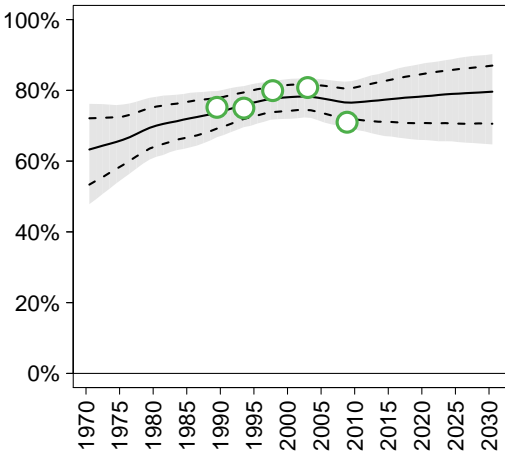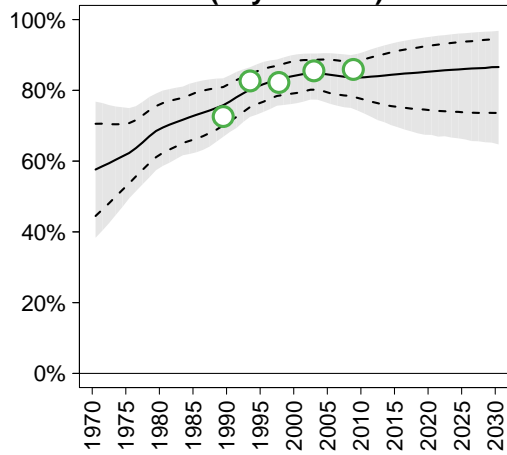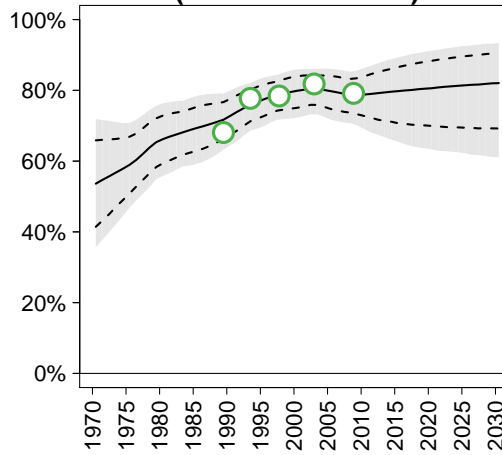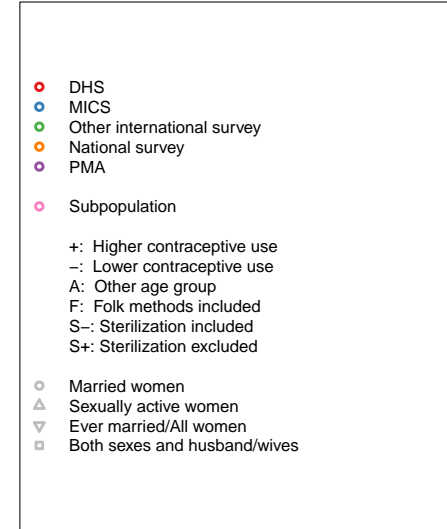

Japan (Eastern Asia) --- Married / In-Union

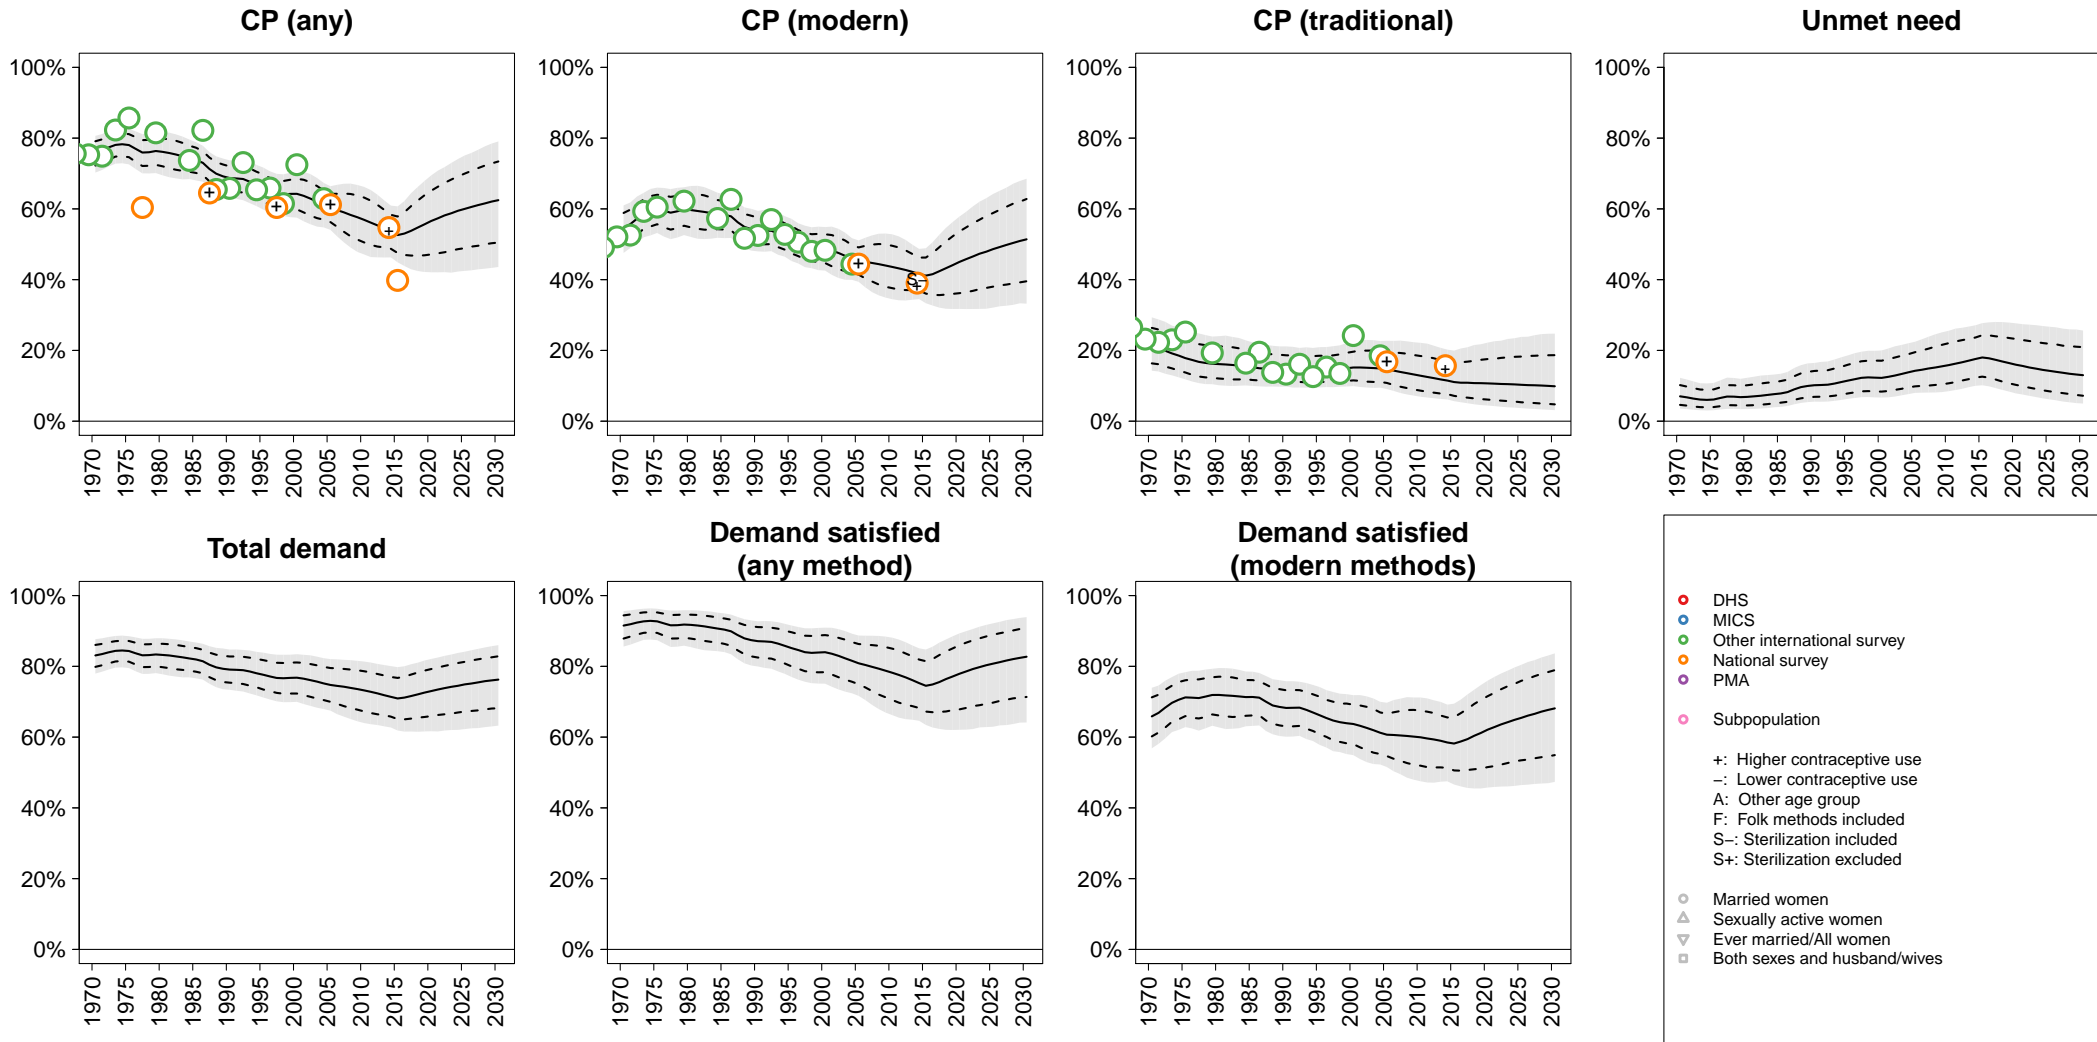

Jordan (Western Asia) --- Married / In-Union

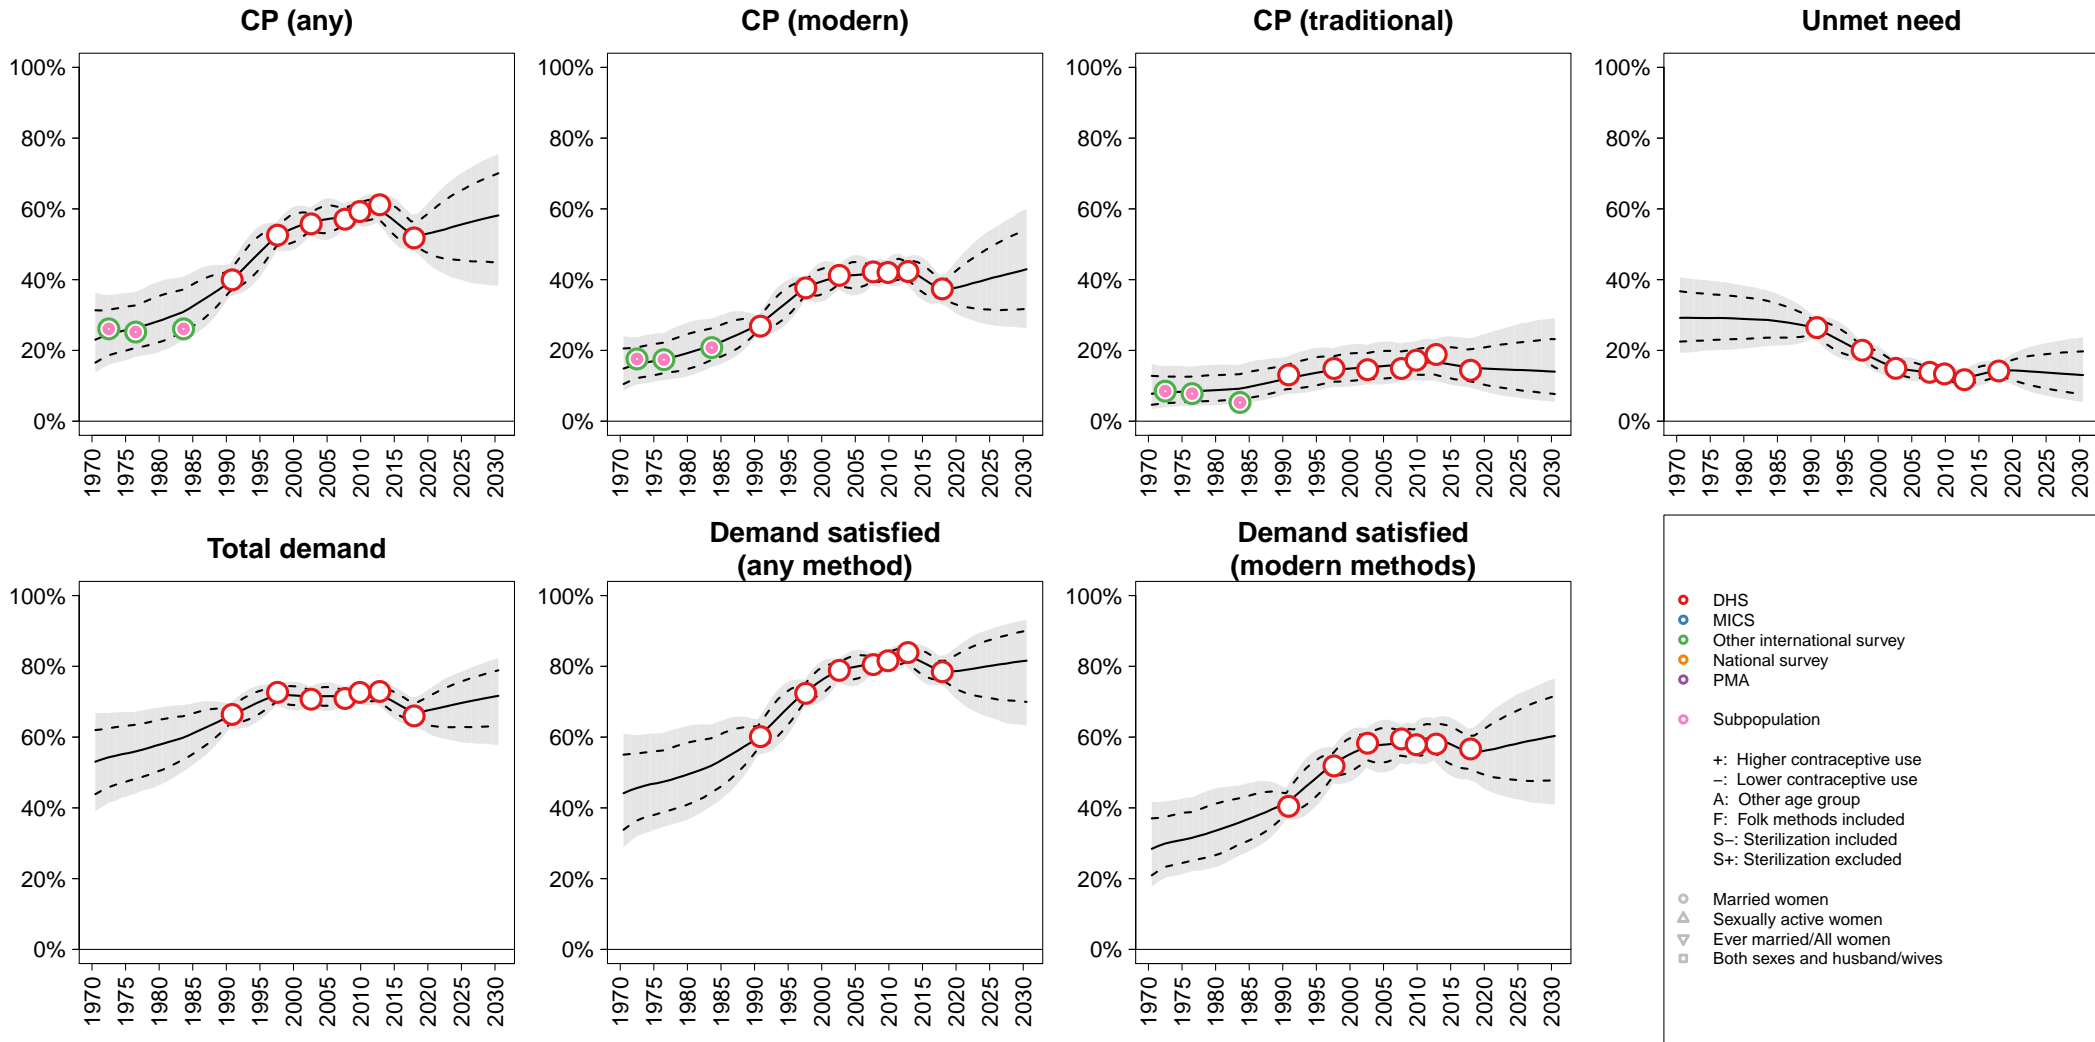

Kazakhstan (Central Asia) --- Married / In-Union

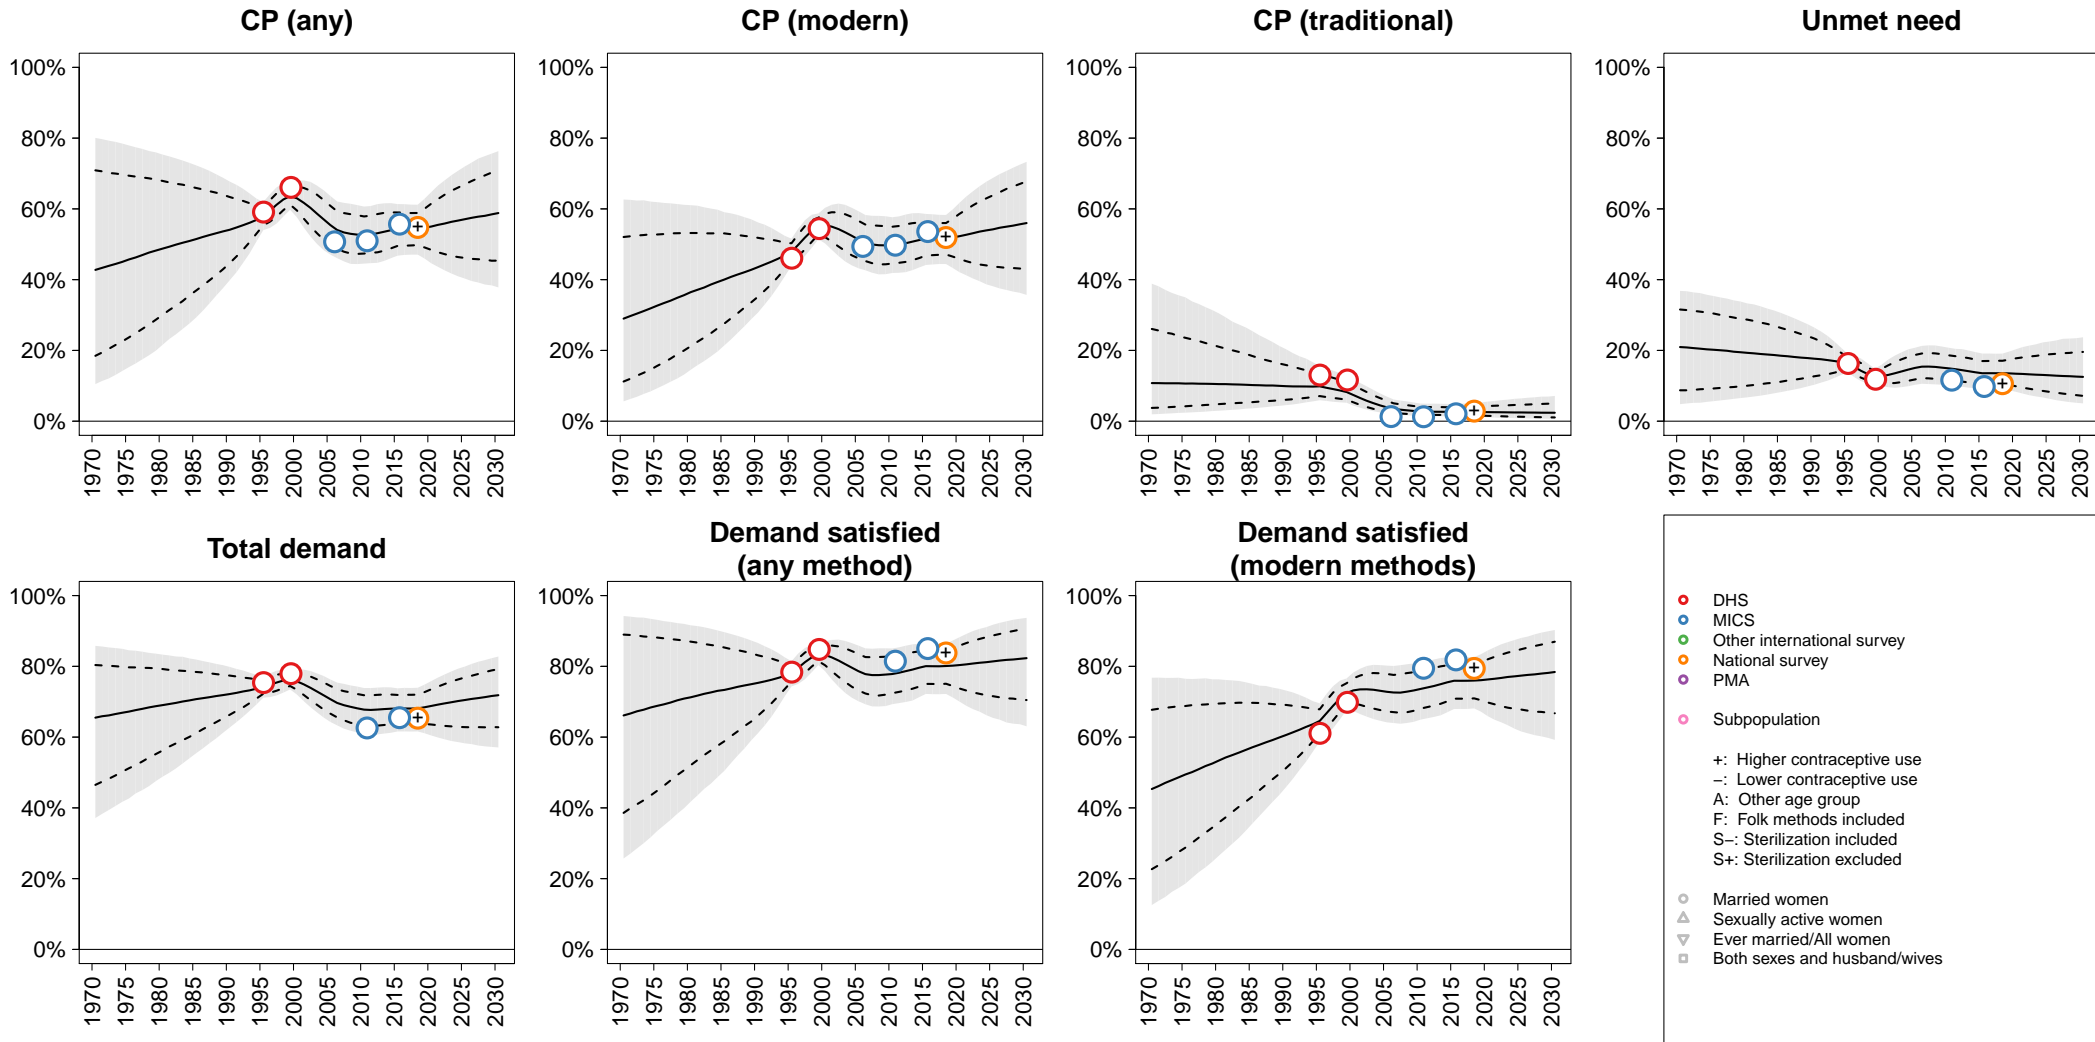

Kenya (Eastern Africa) --- Married / In-Union

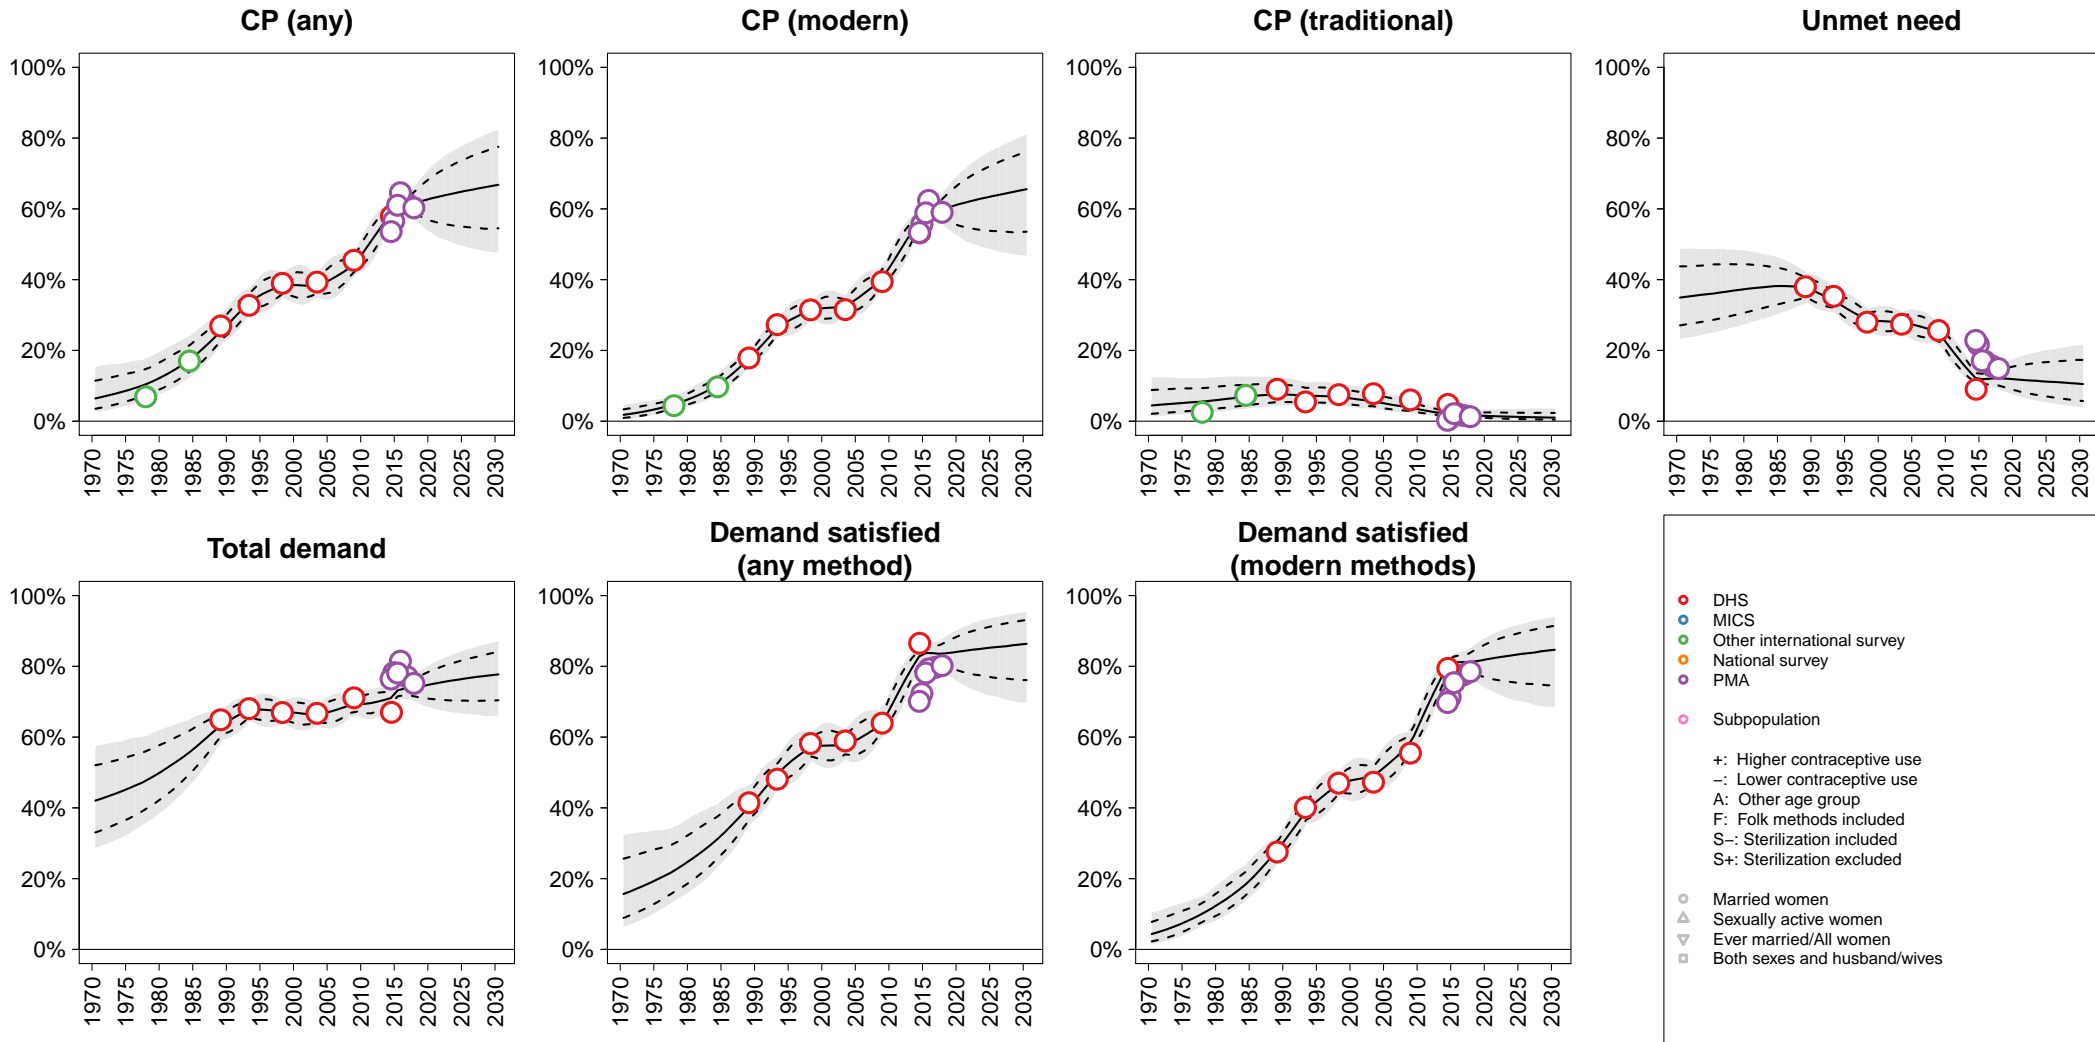

Kiribati (Micronesia) --- Married / In-Union

CP (any)

CP (modern)

CP (traditional)

Unmet need

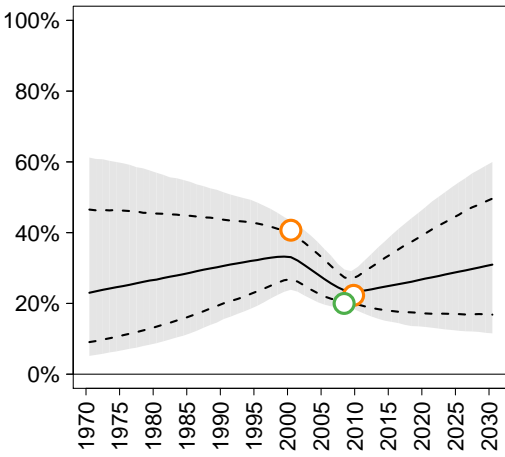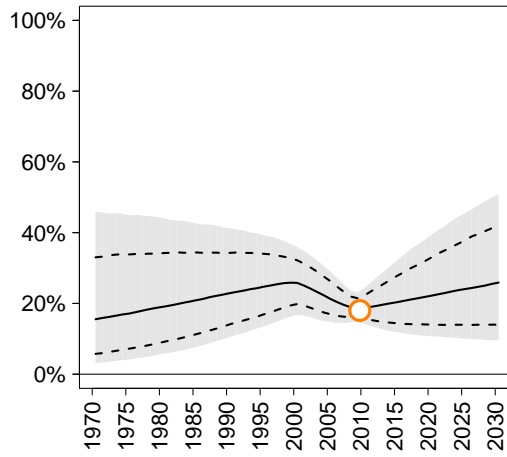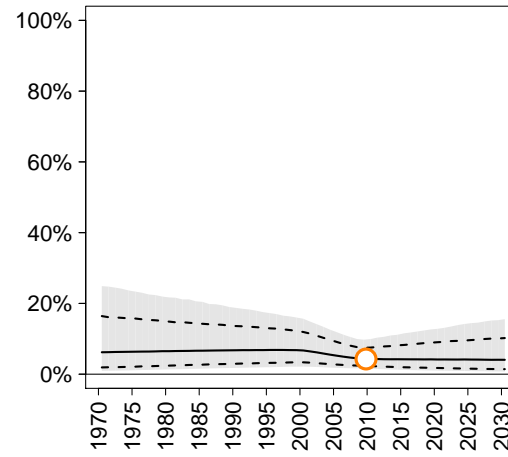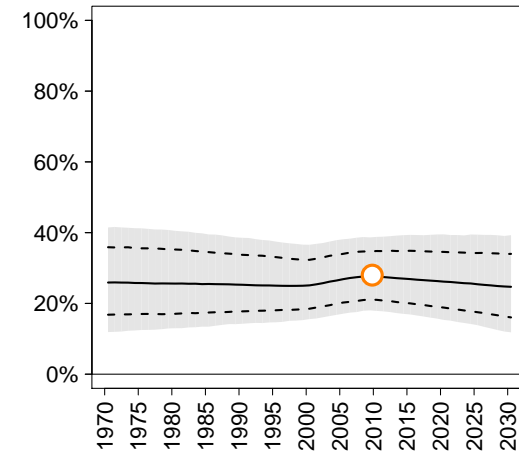

Total demand

Demand satisfied (any method)

Demand satisfied (modern methods)

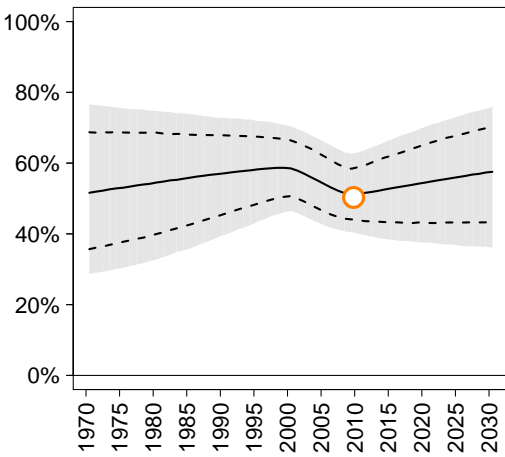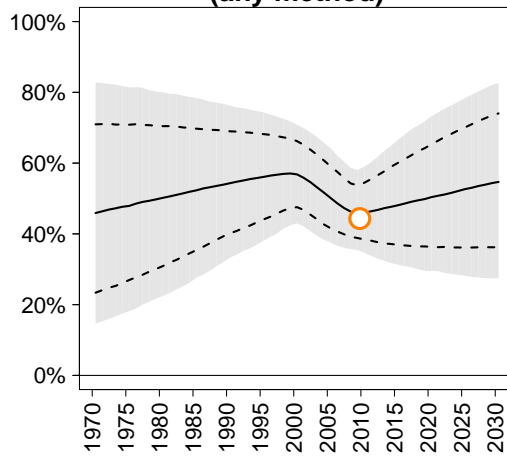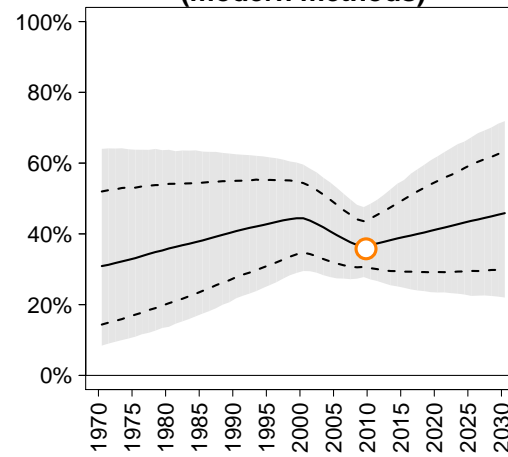



Kuwait (Western Asia) --- Married / In-Union

CP (any)

CP (modern)

CP (traditional)

Unmet need

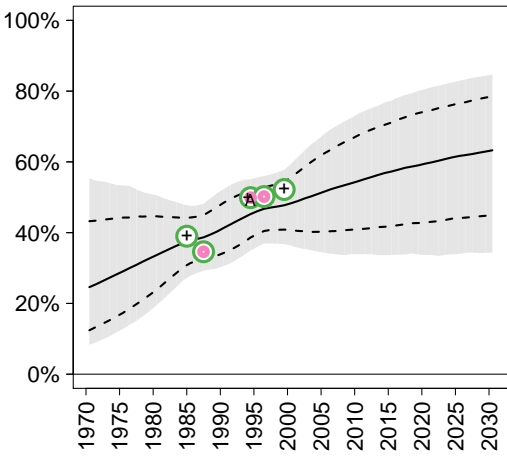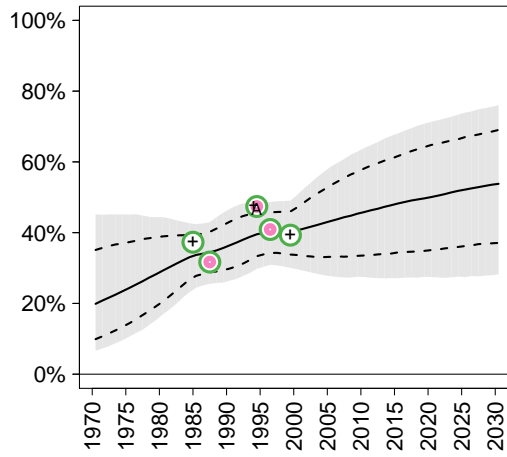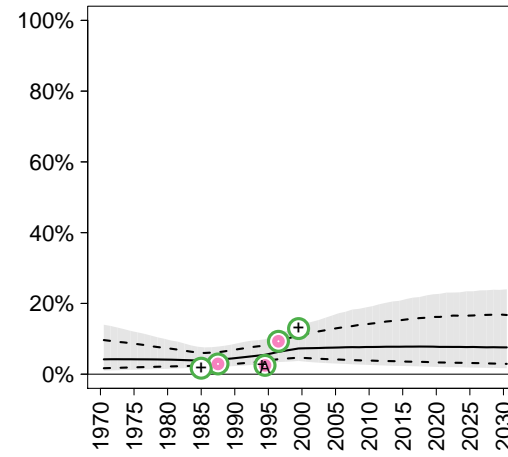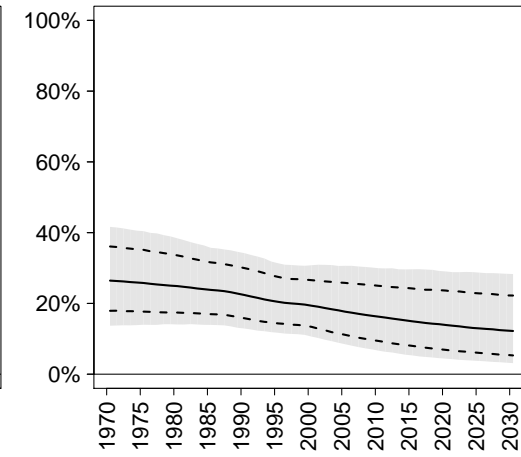

Total demand

Demand satisfied (any method)

Demand satisfied (modern methods)

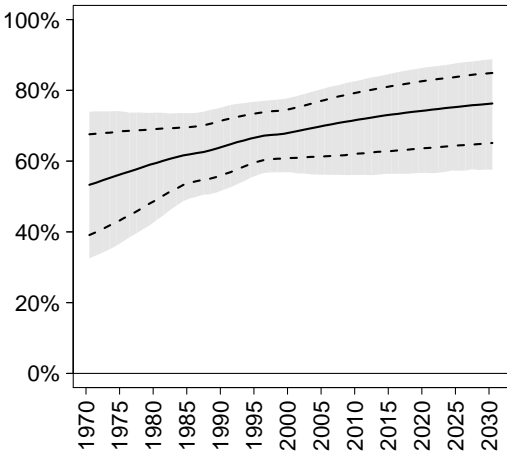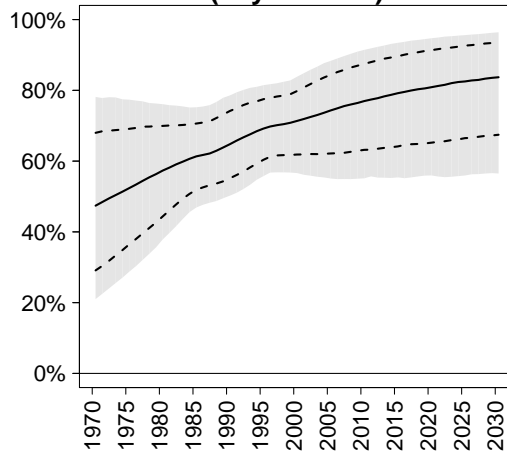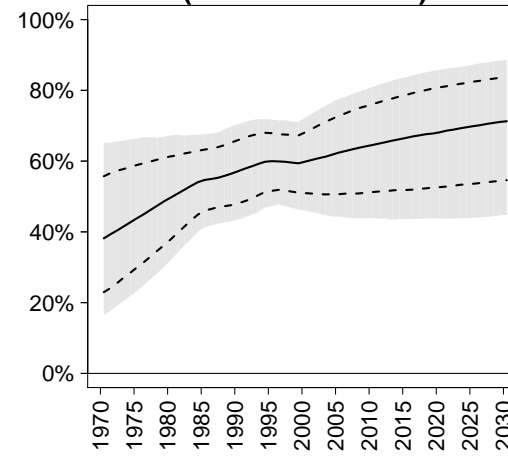

Kyrgyzstan (Central Asia) --- Married / In-Union

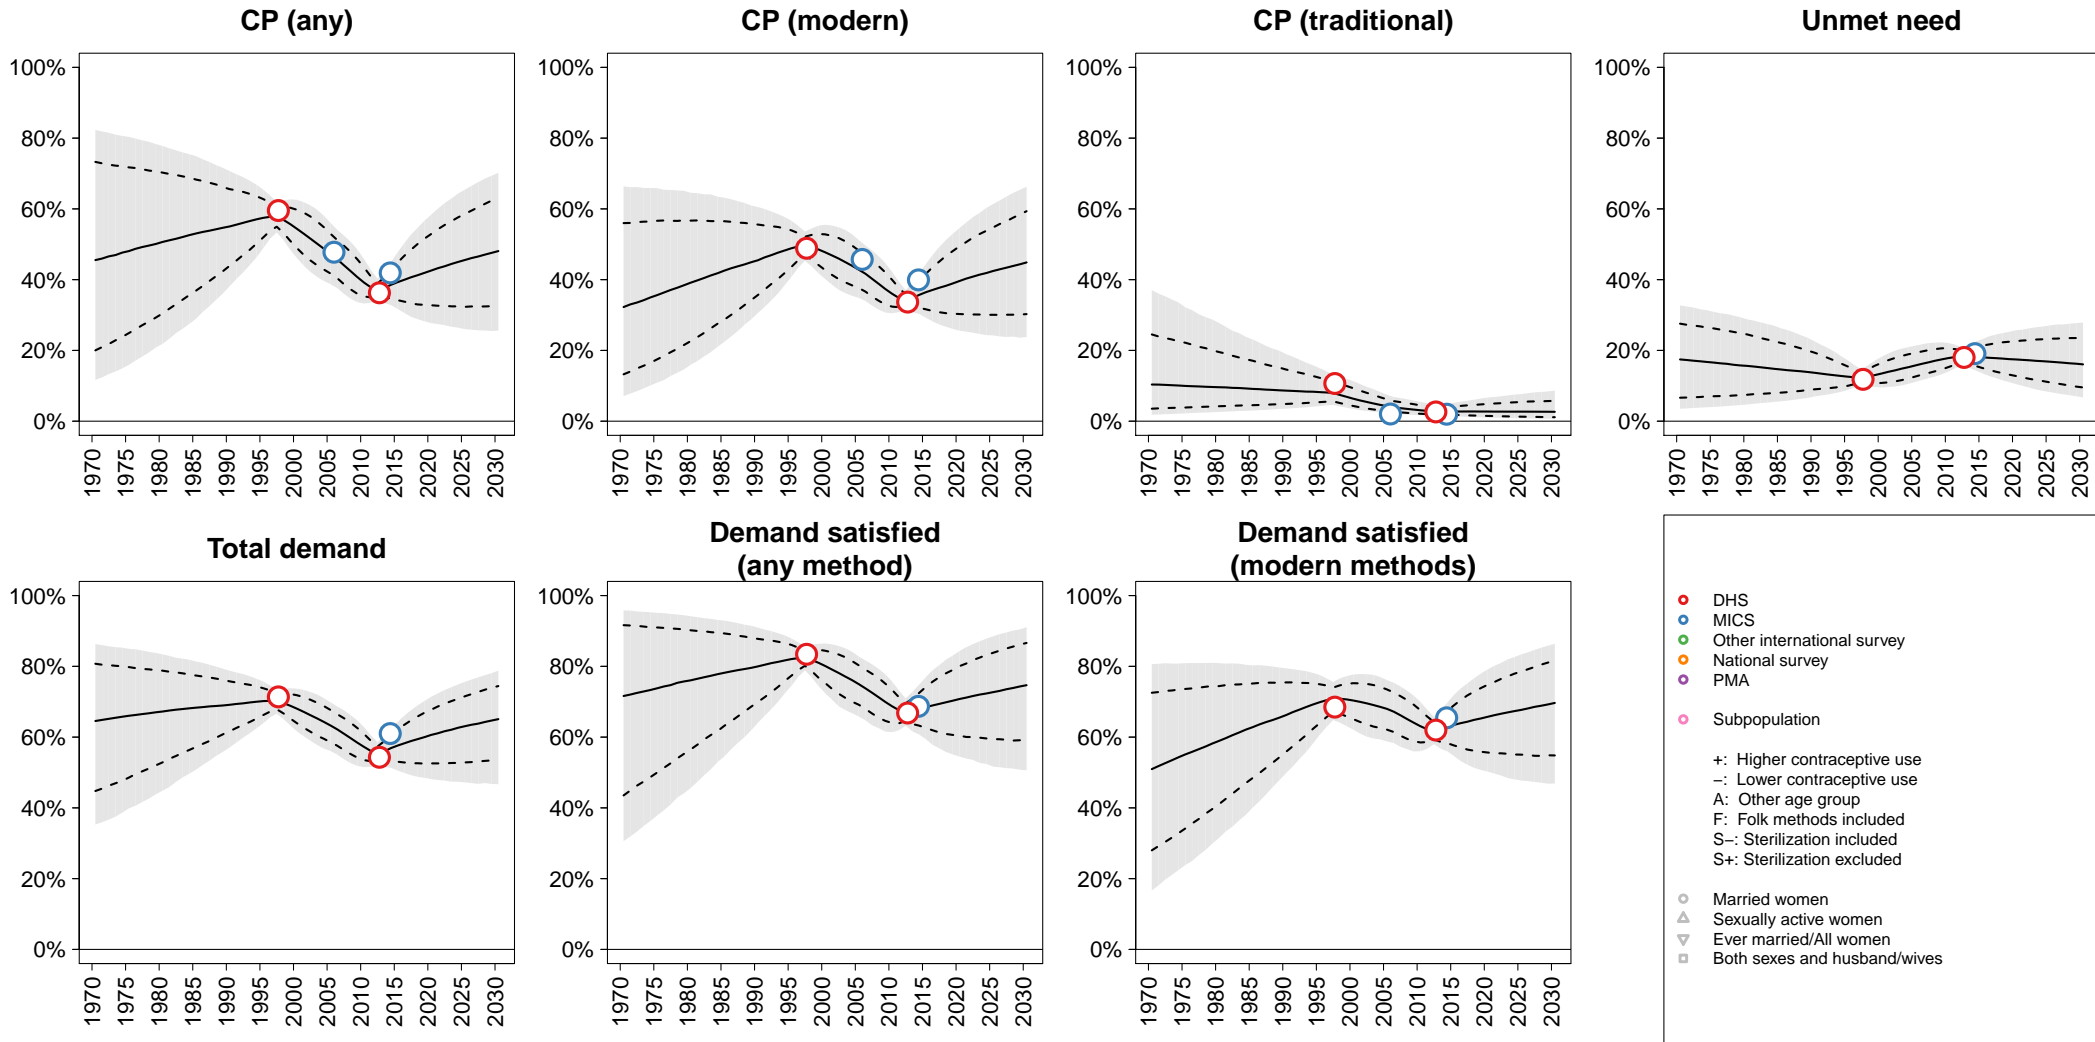

Lao People's Dem. Republic (South-eastern Asia) --- Married / In-Union

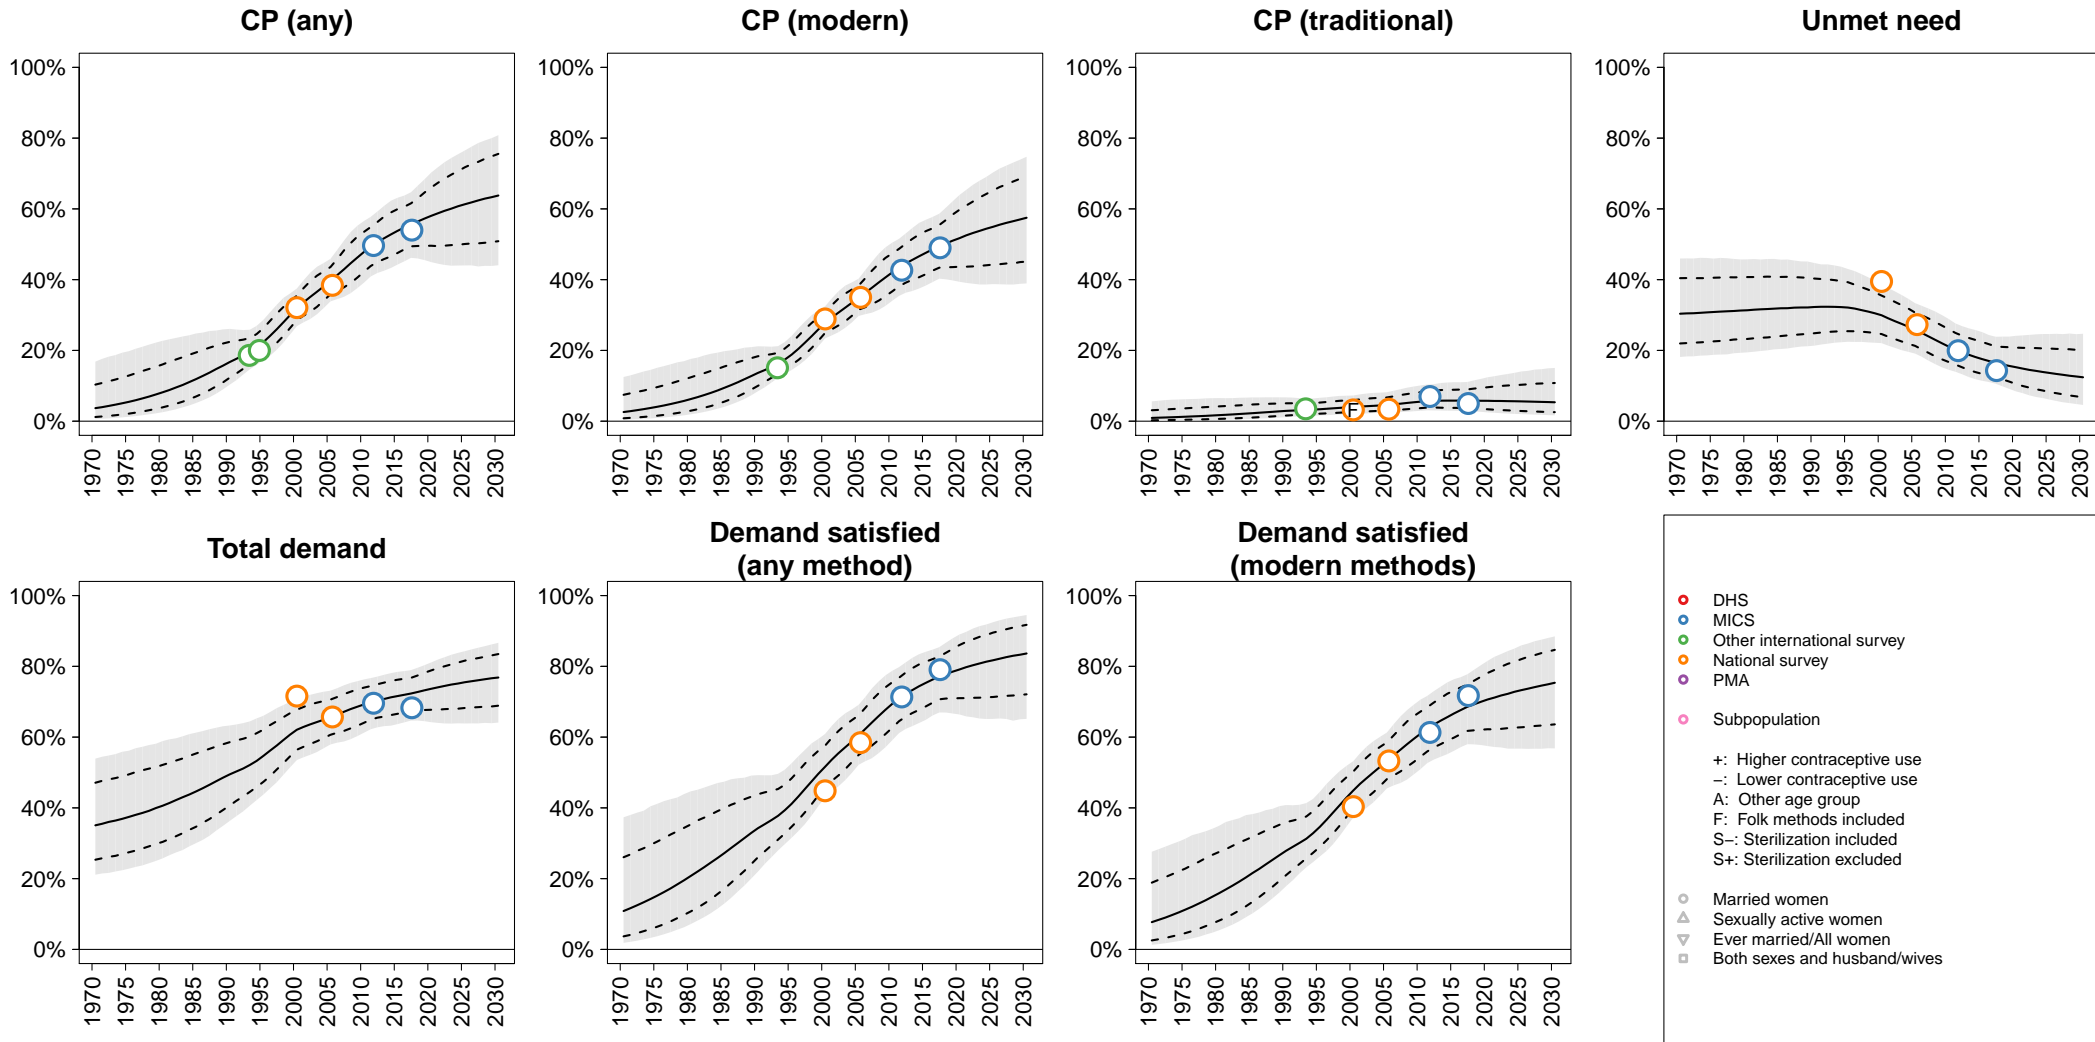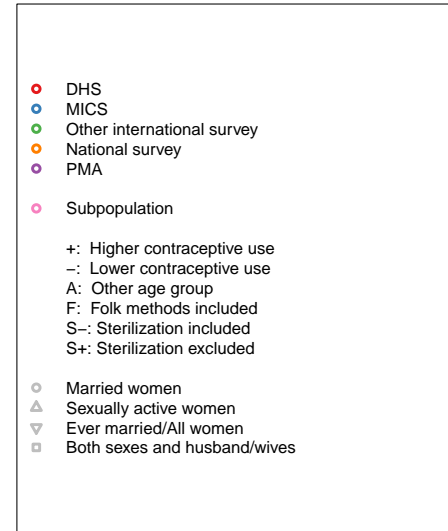

Latvia (Northern Europe) --- Married / In-Union

CP (any)

CP (modern)

CP (traditional)

Unmet need

Total demand

Demand satisfied (any method)

Demand satisfied (modern methods)

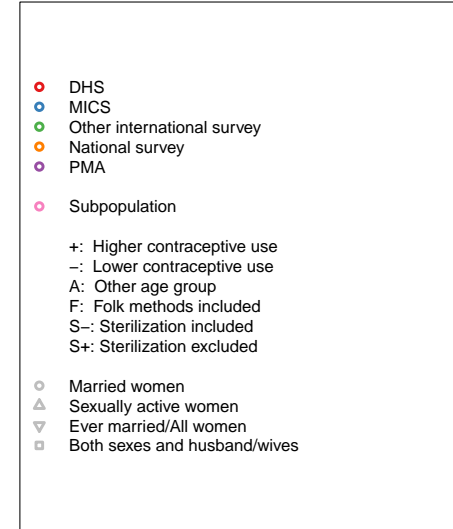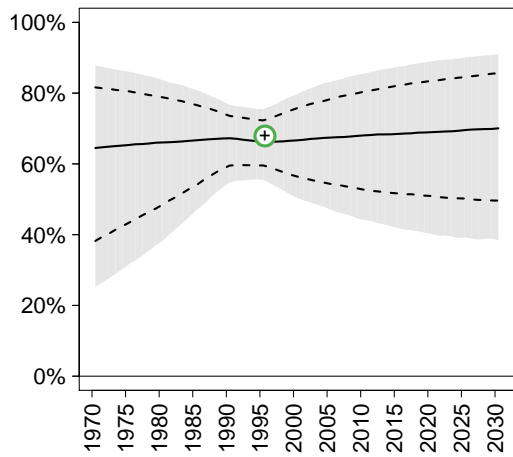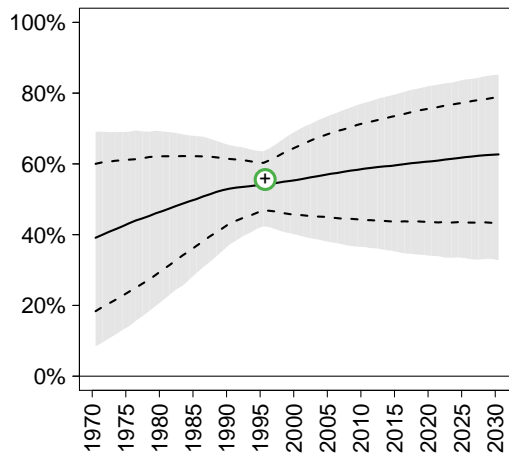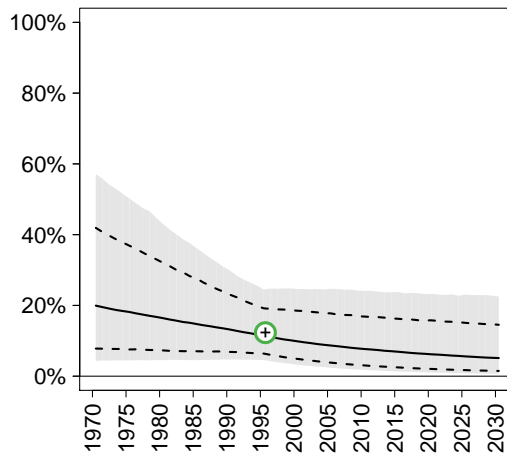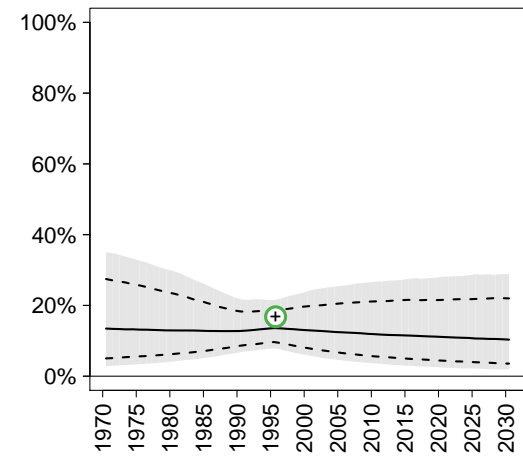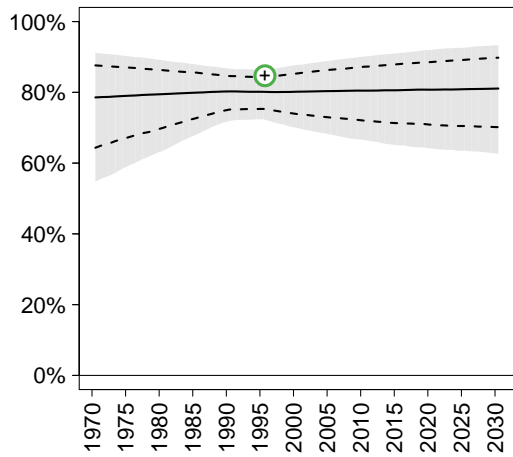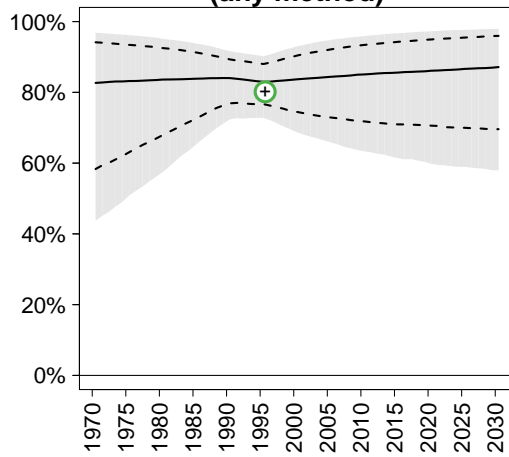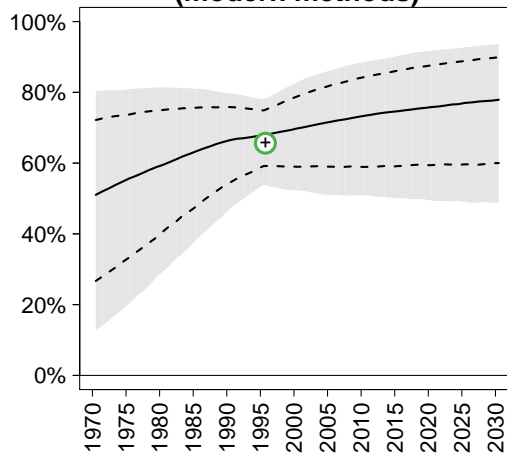

Lebanon (Western Asia) --- Married / In-Union

CP (any)

CP (modern)

CP (traditional)

Unmet need

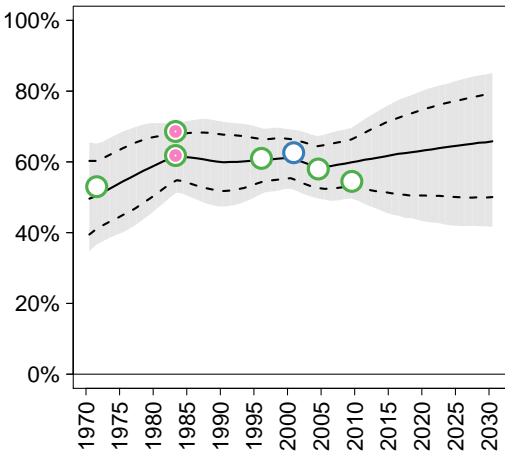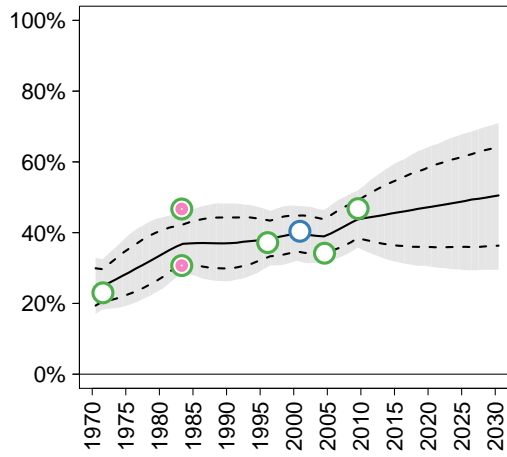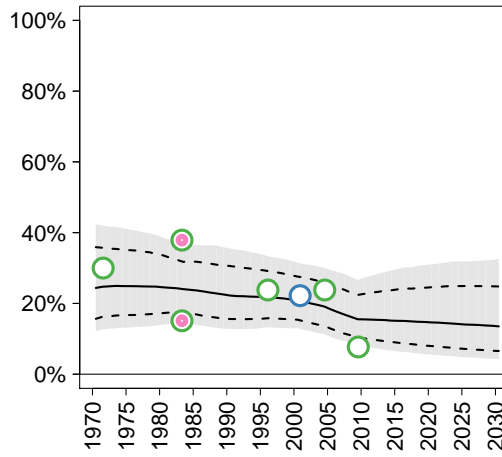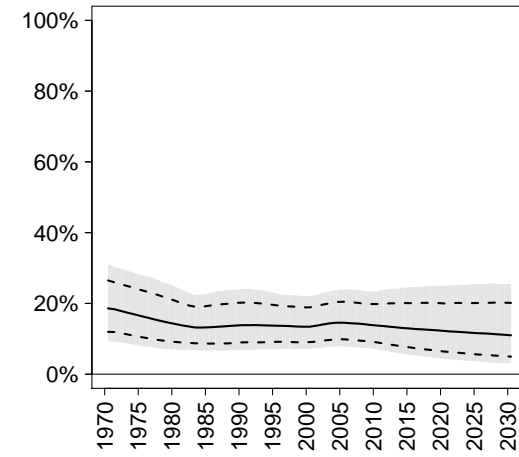

Total demand

Demand satisfied (any method)

Demand satisfied (modern methods)

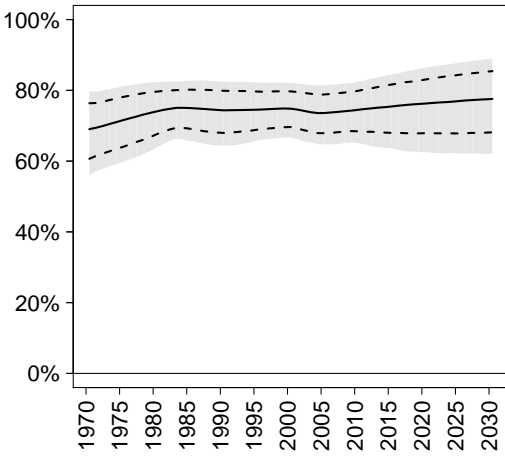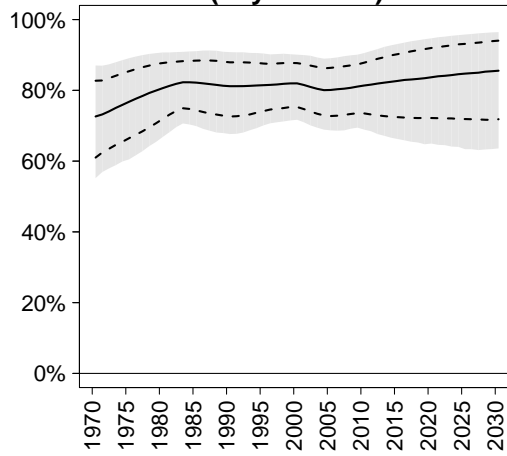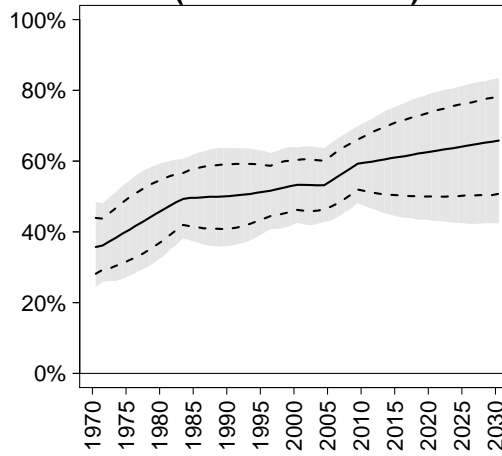

Lesotho (Southern Africa) --- Married / In-Union

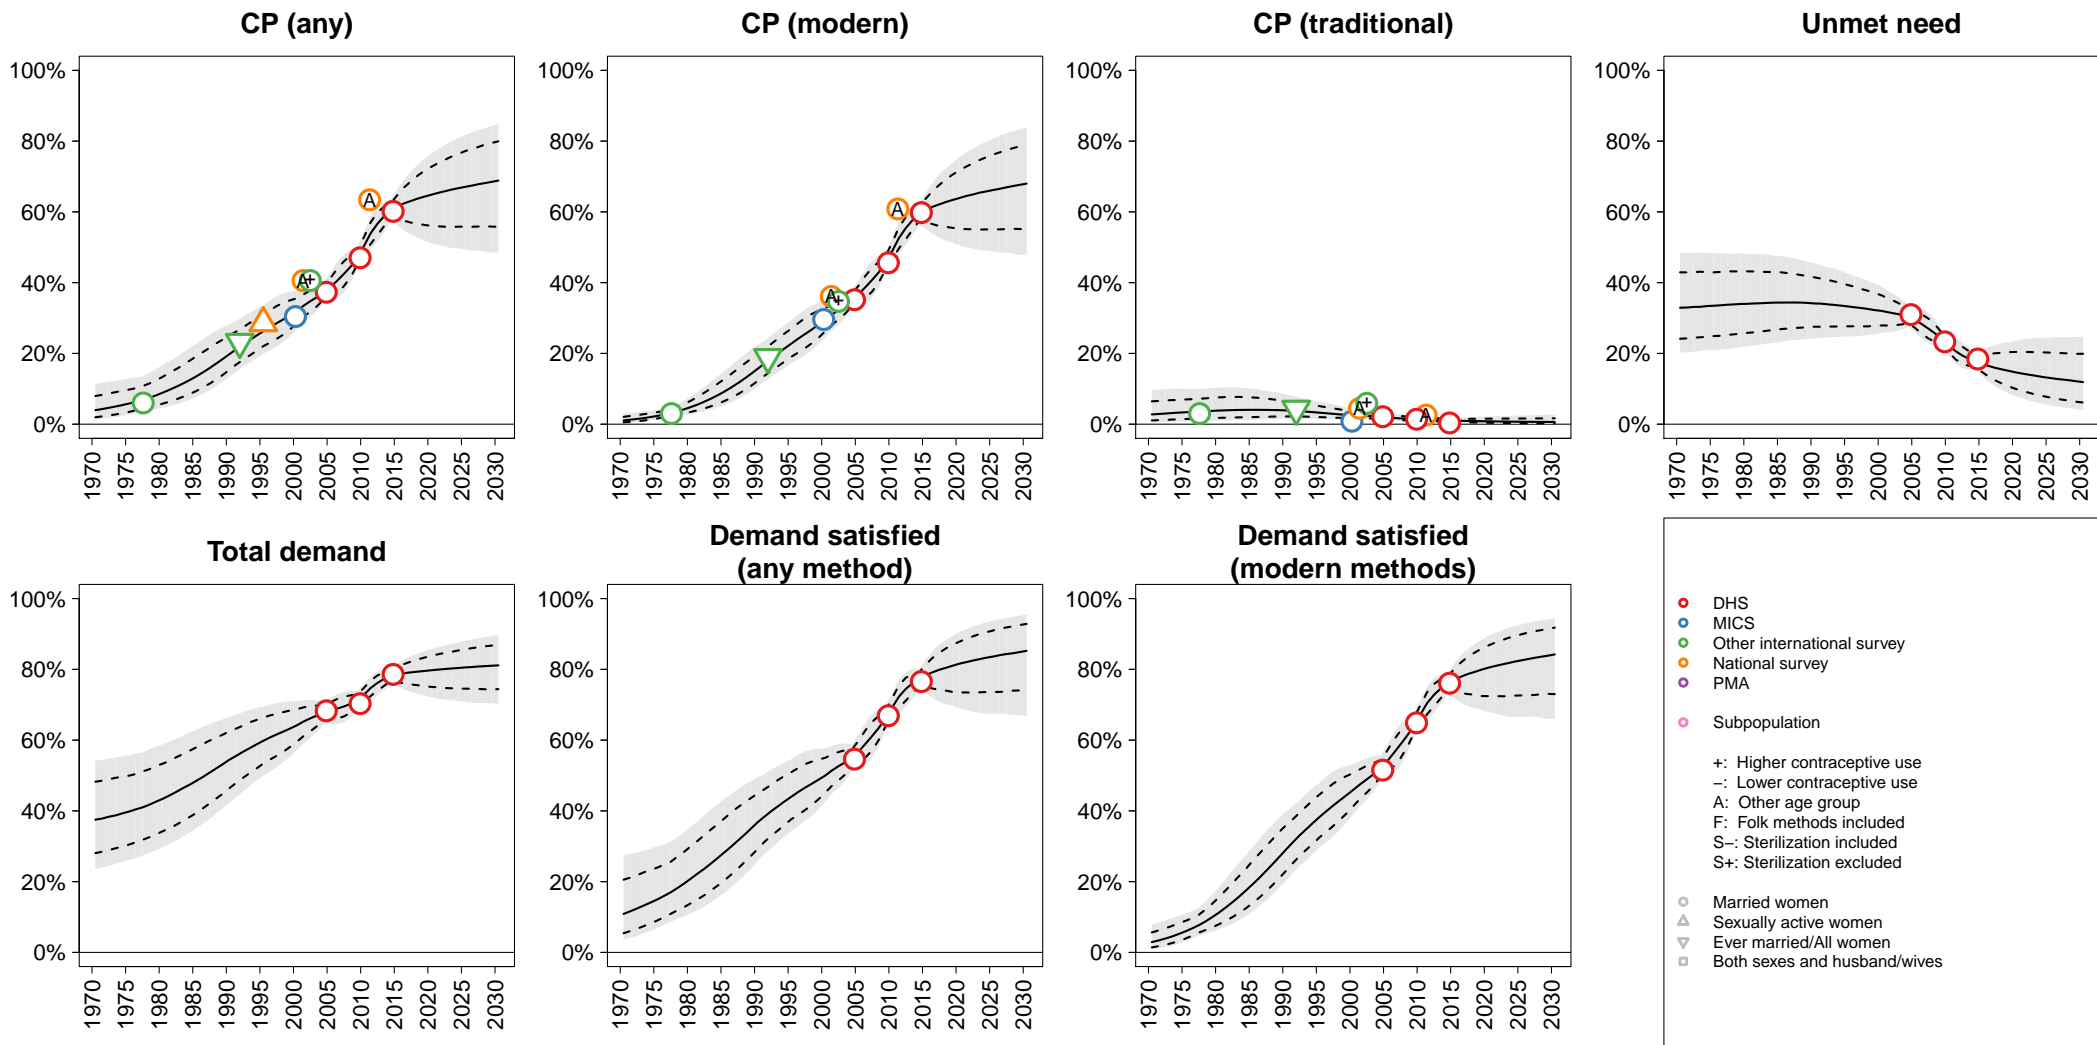

Liberia (Western Africa) --- Married / In-Union

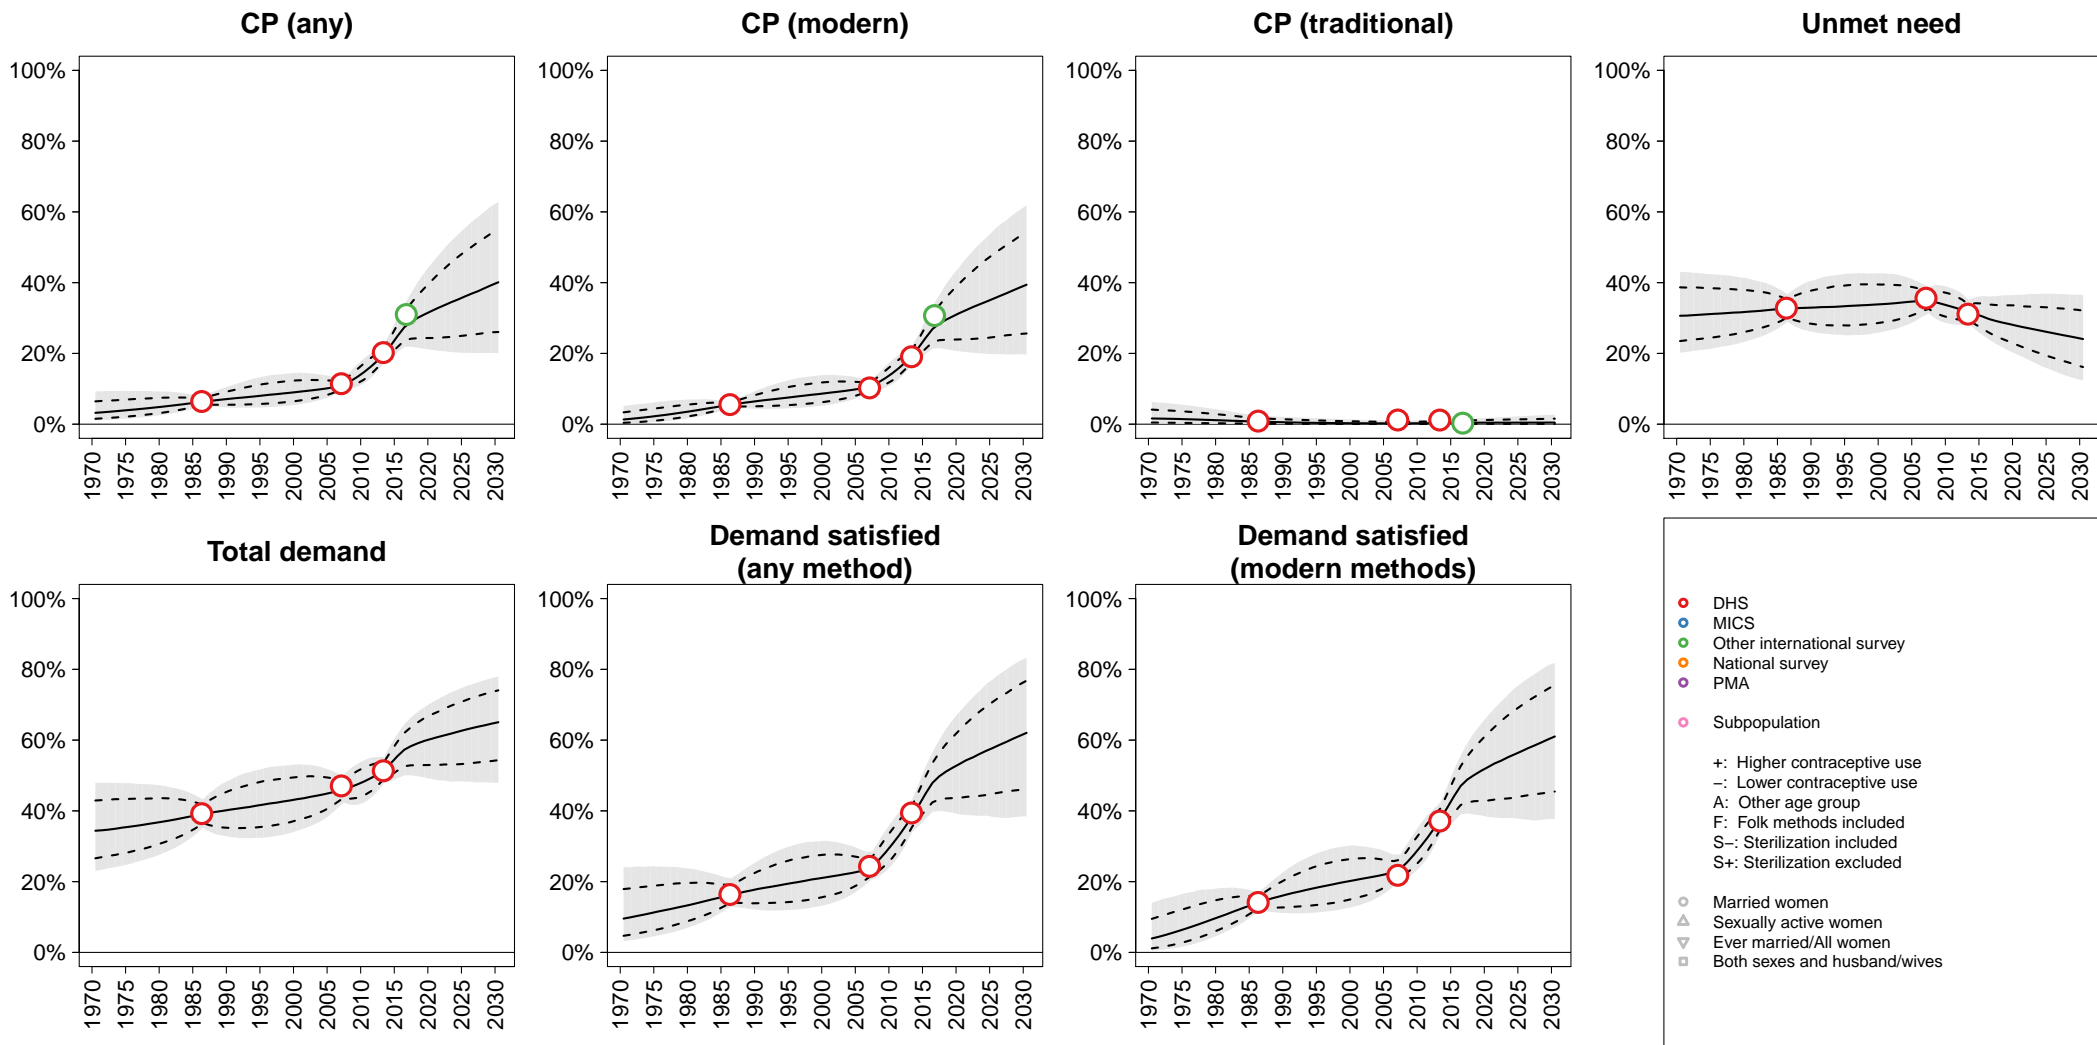

Libya (Northern Africa) --- Married / In-Union

CP (any)

CP (modern)

CP (traditional)

Unmet need

Total demand

Demand satisfied (any method)

Demand satisfied (modern methods)





Lithuania (Northern Europe) --- Married / In-Union

CP (any)

CP (modern)

CP (traditional)

Unmet need

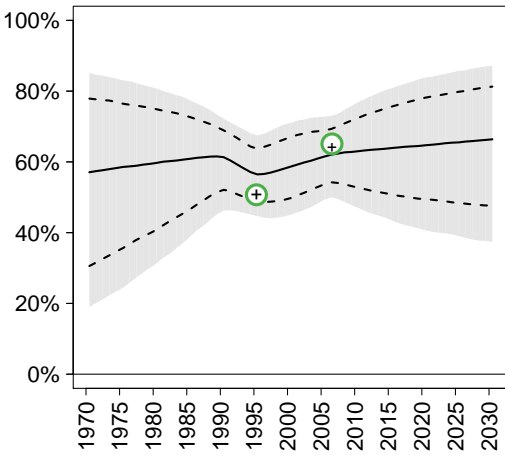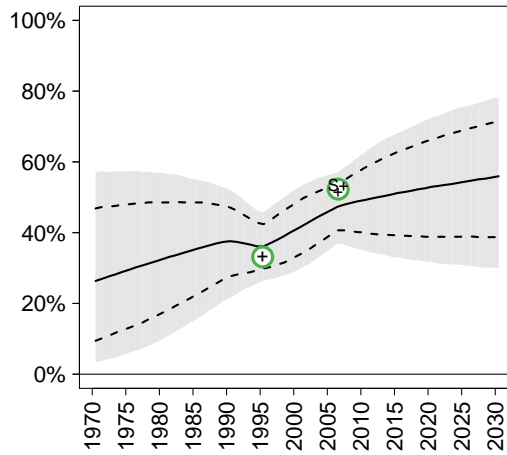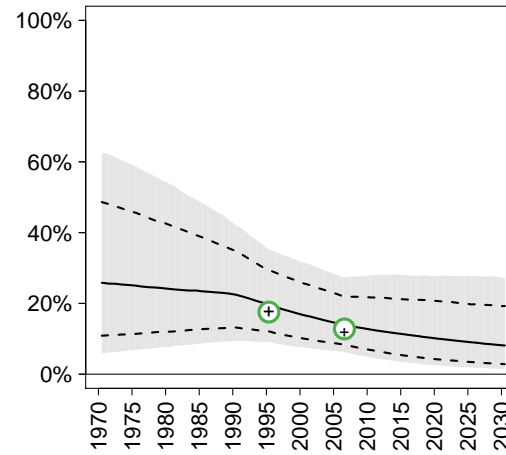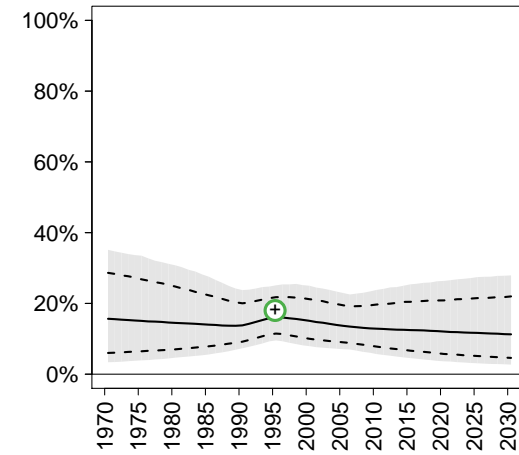

Total demand

Demand satisfied (any method)

Demand satisfied (modern methods)

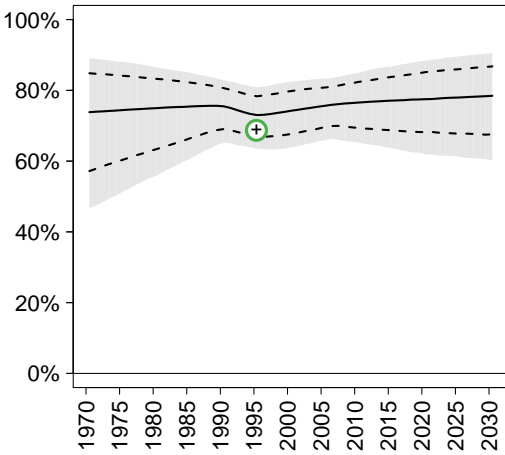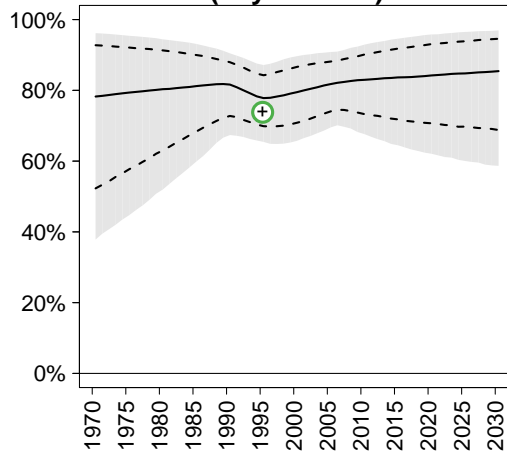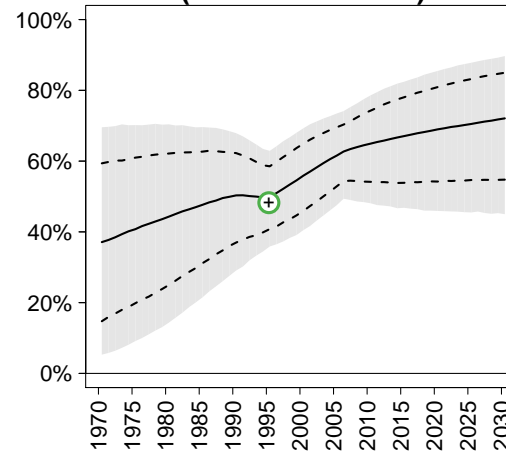

Madagascar (Eastern Africa) --- Married / In-Union

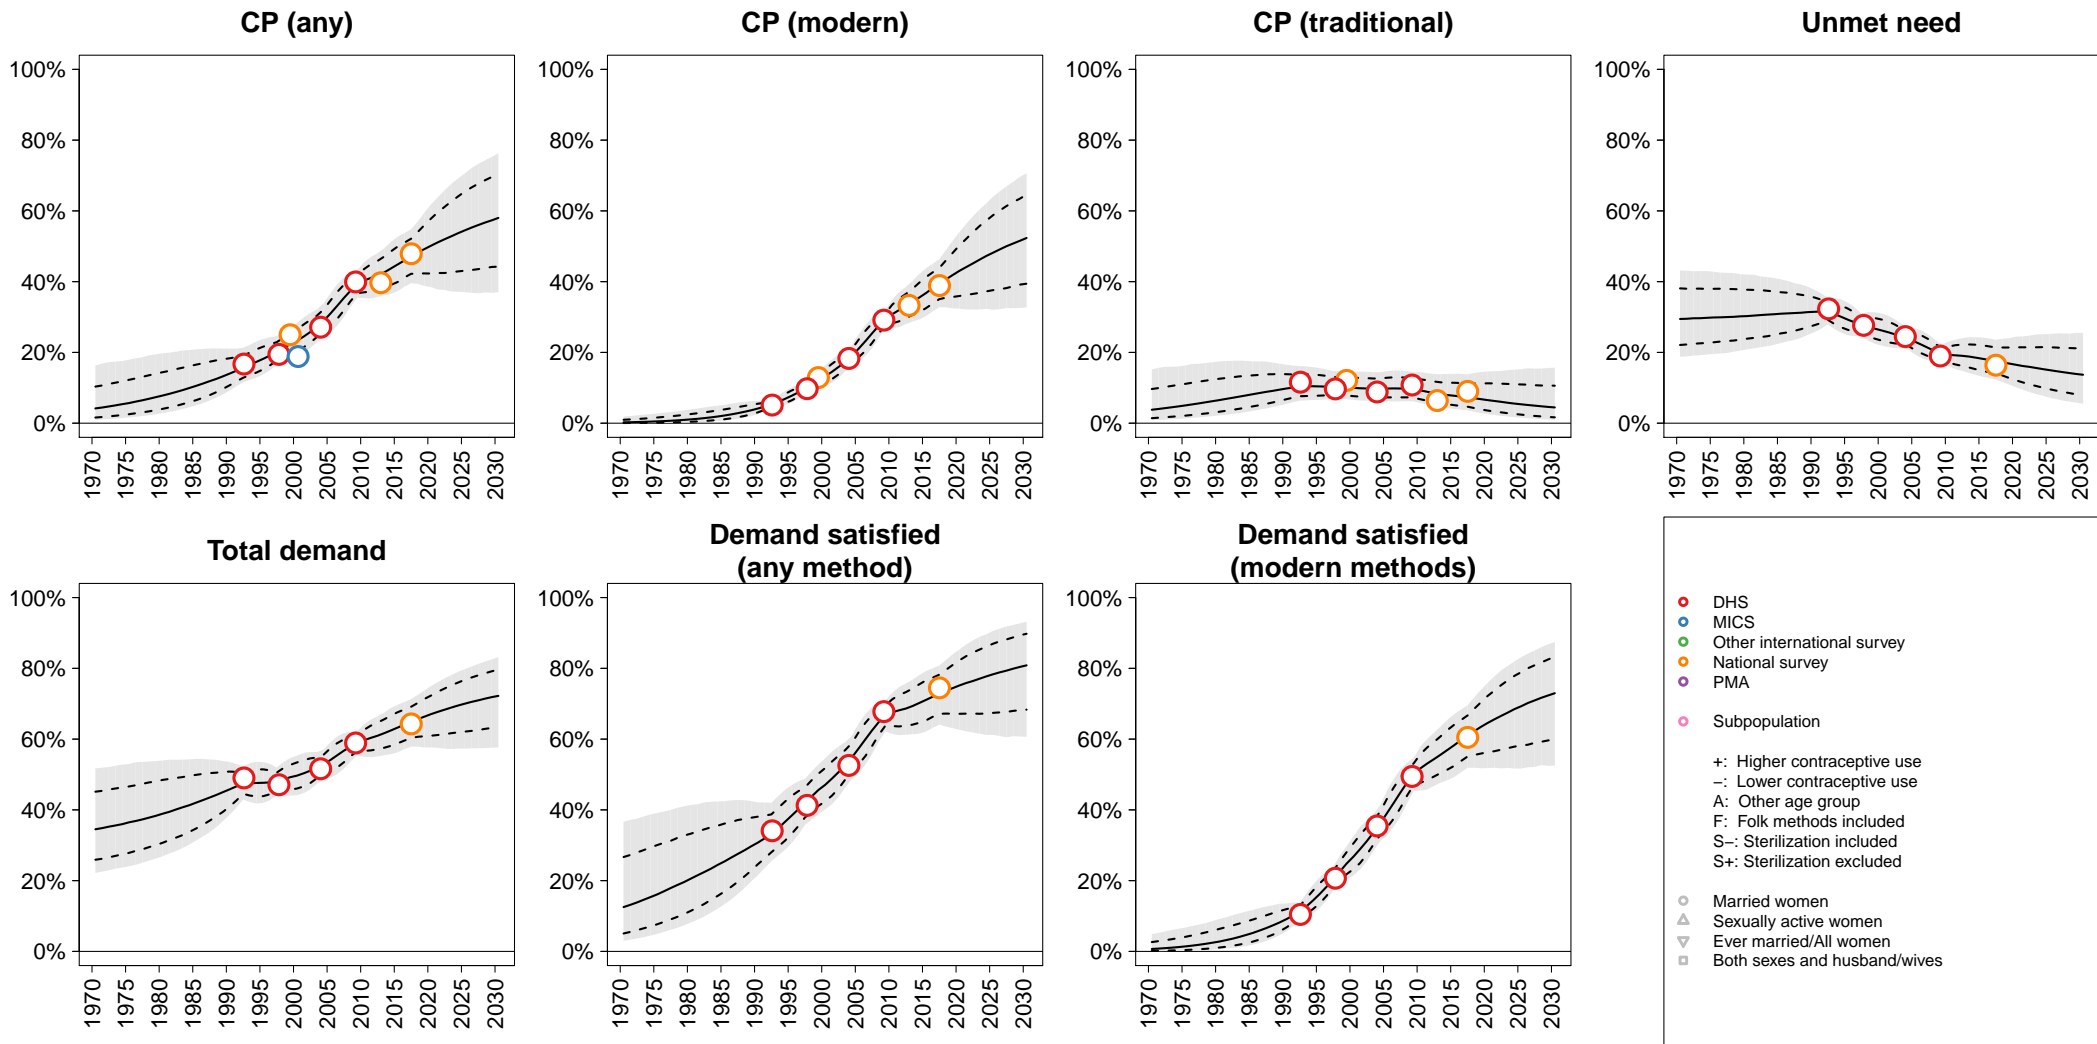

Malawi (Eastern Africa) --- Married / In-Union

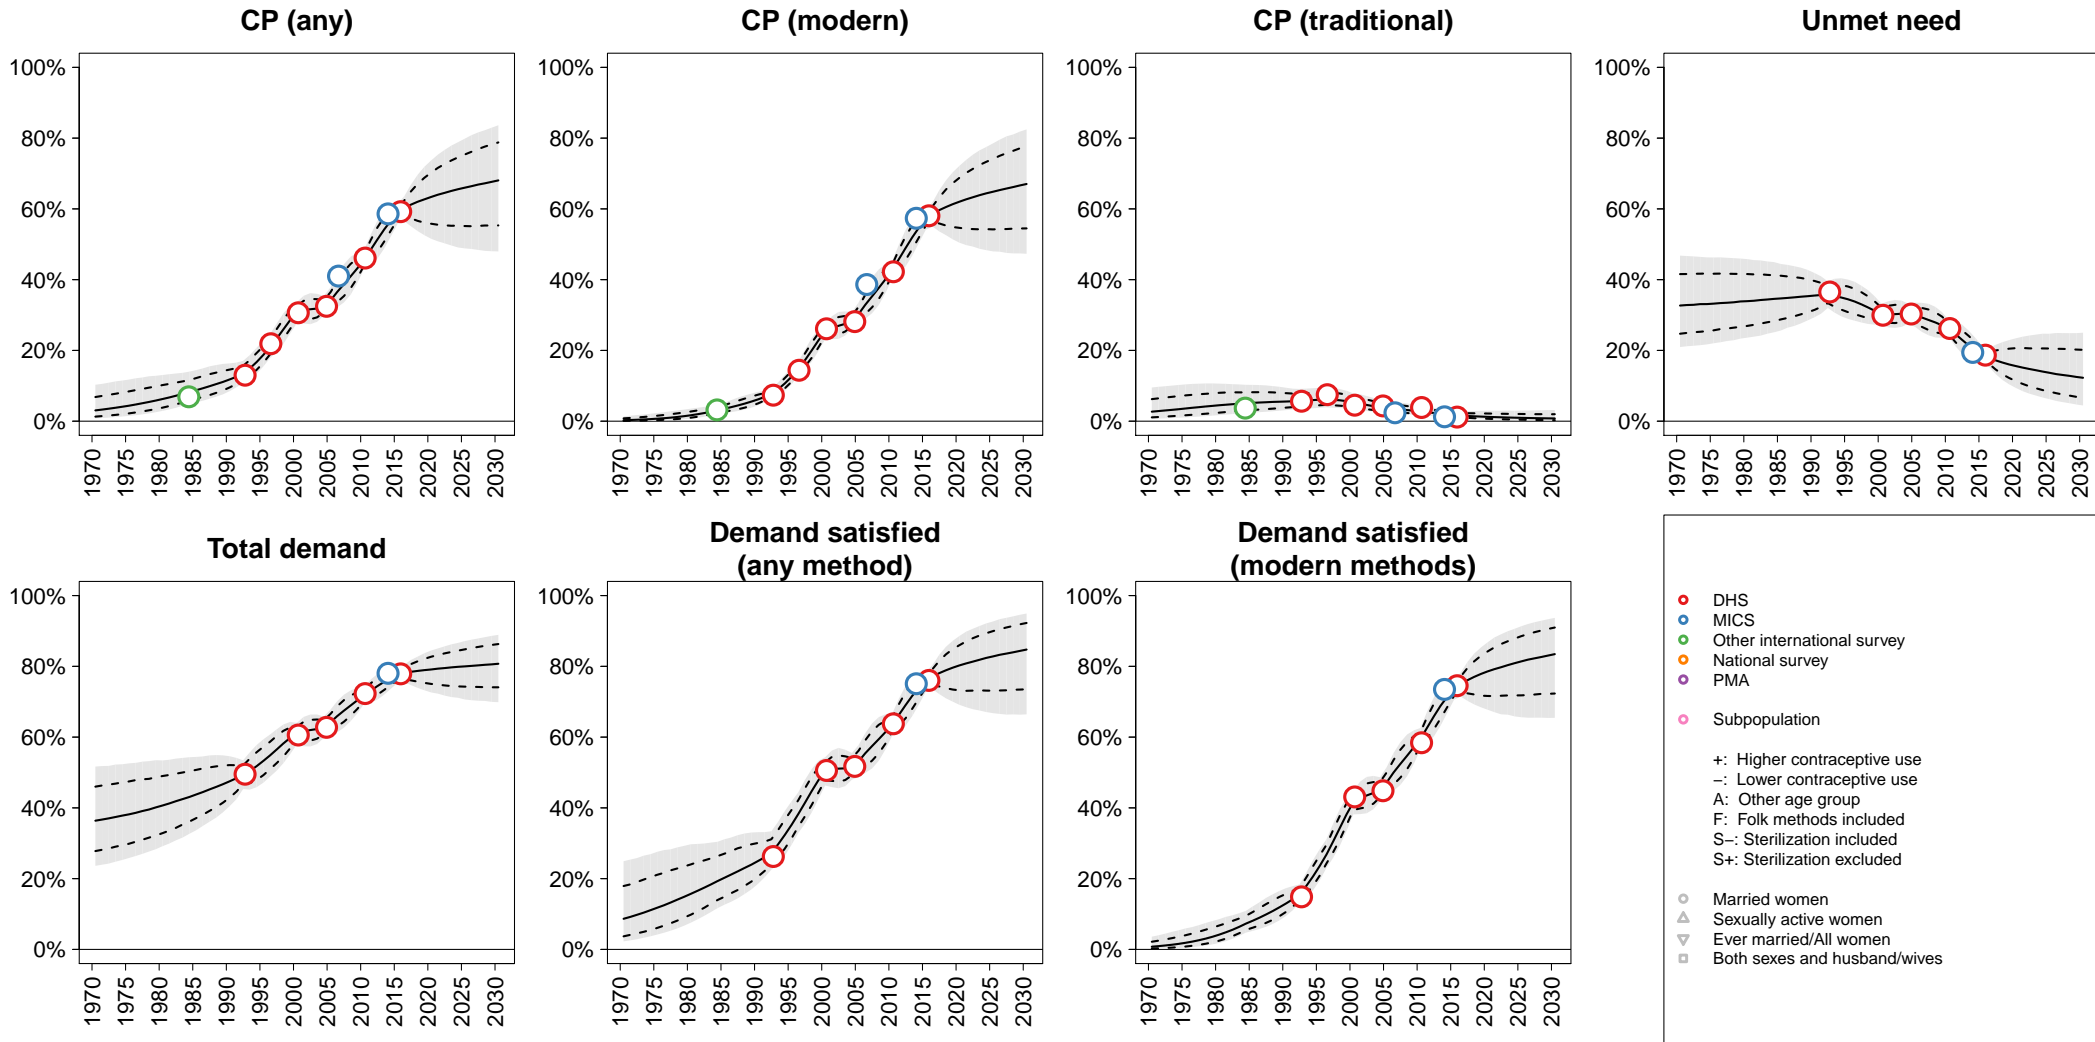

Malaysia (South-eastern Asia) --- Married / In-Union

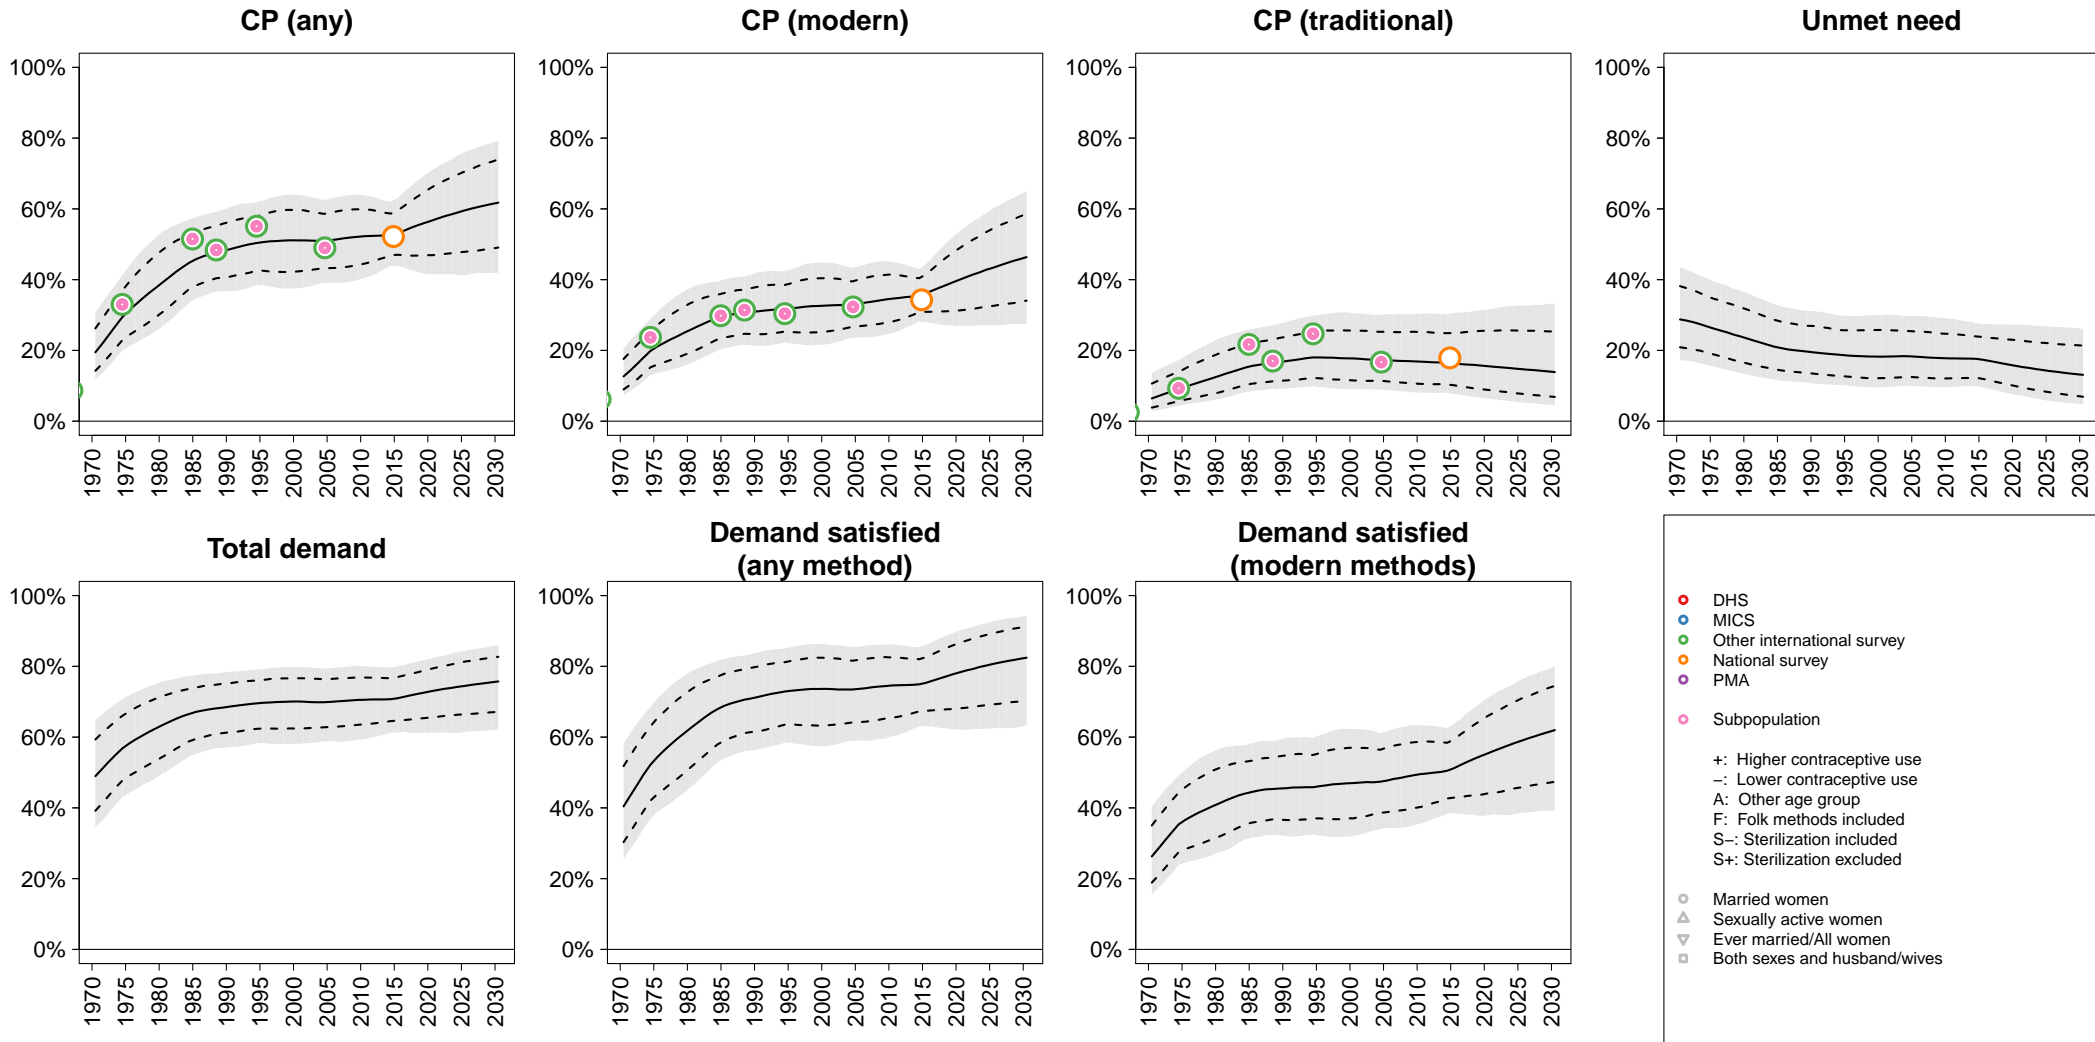

Maldives (Southern Asia) --- Married / In-Union

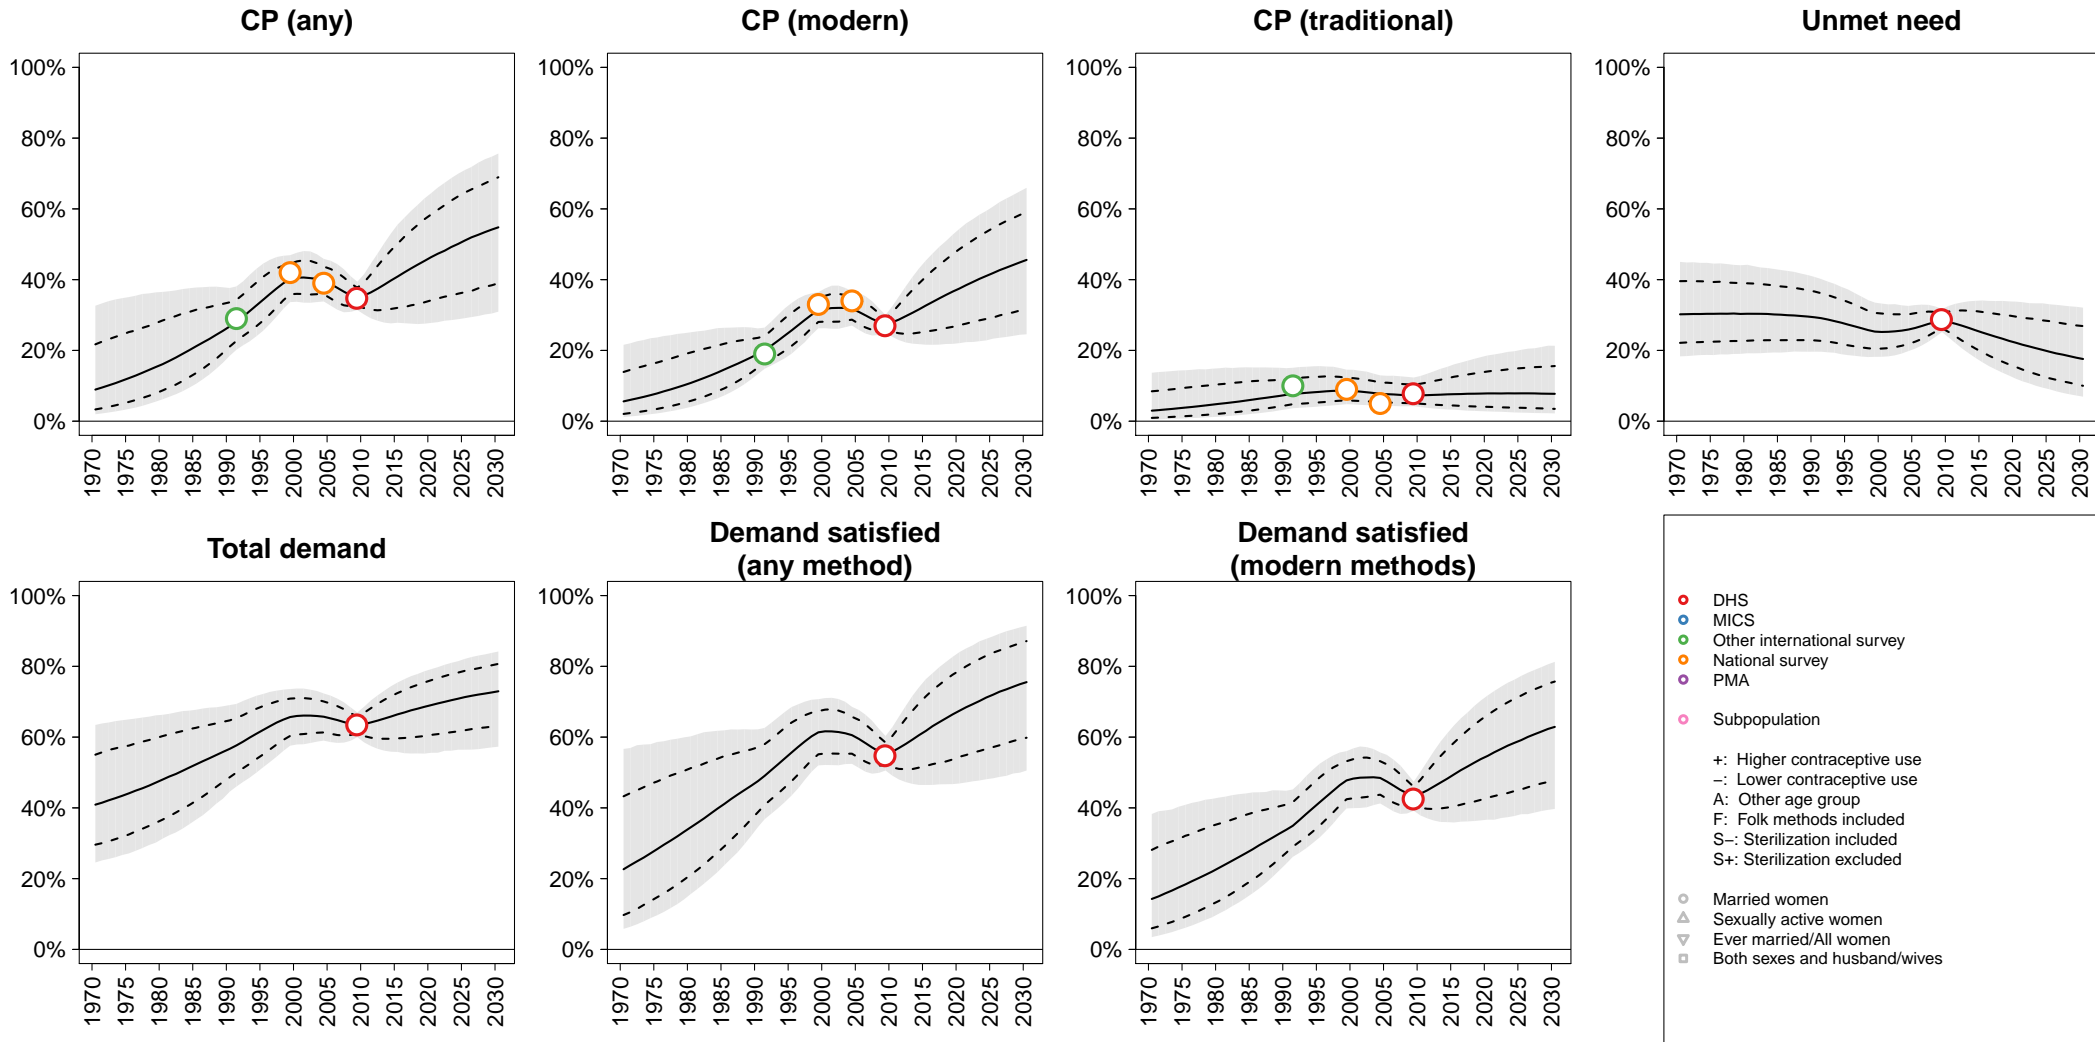

Mali (Western Africa) --- Married / In-Union

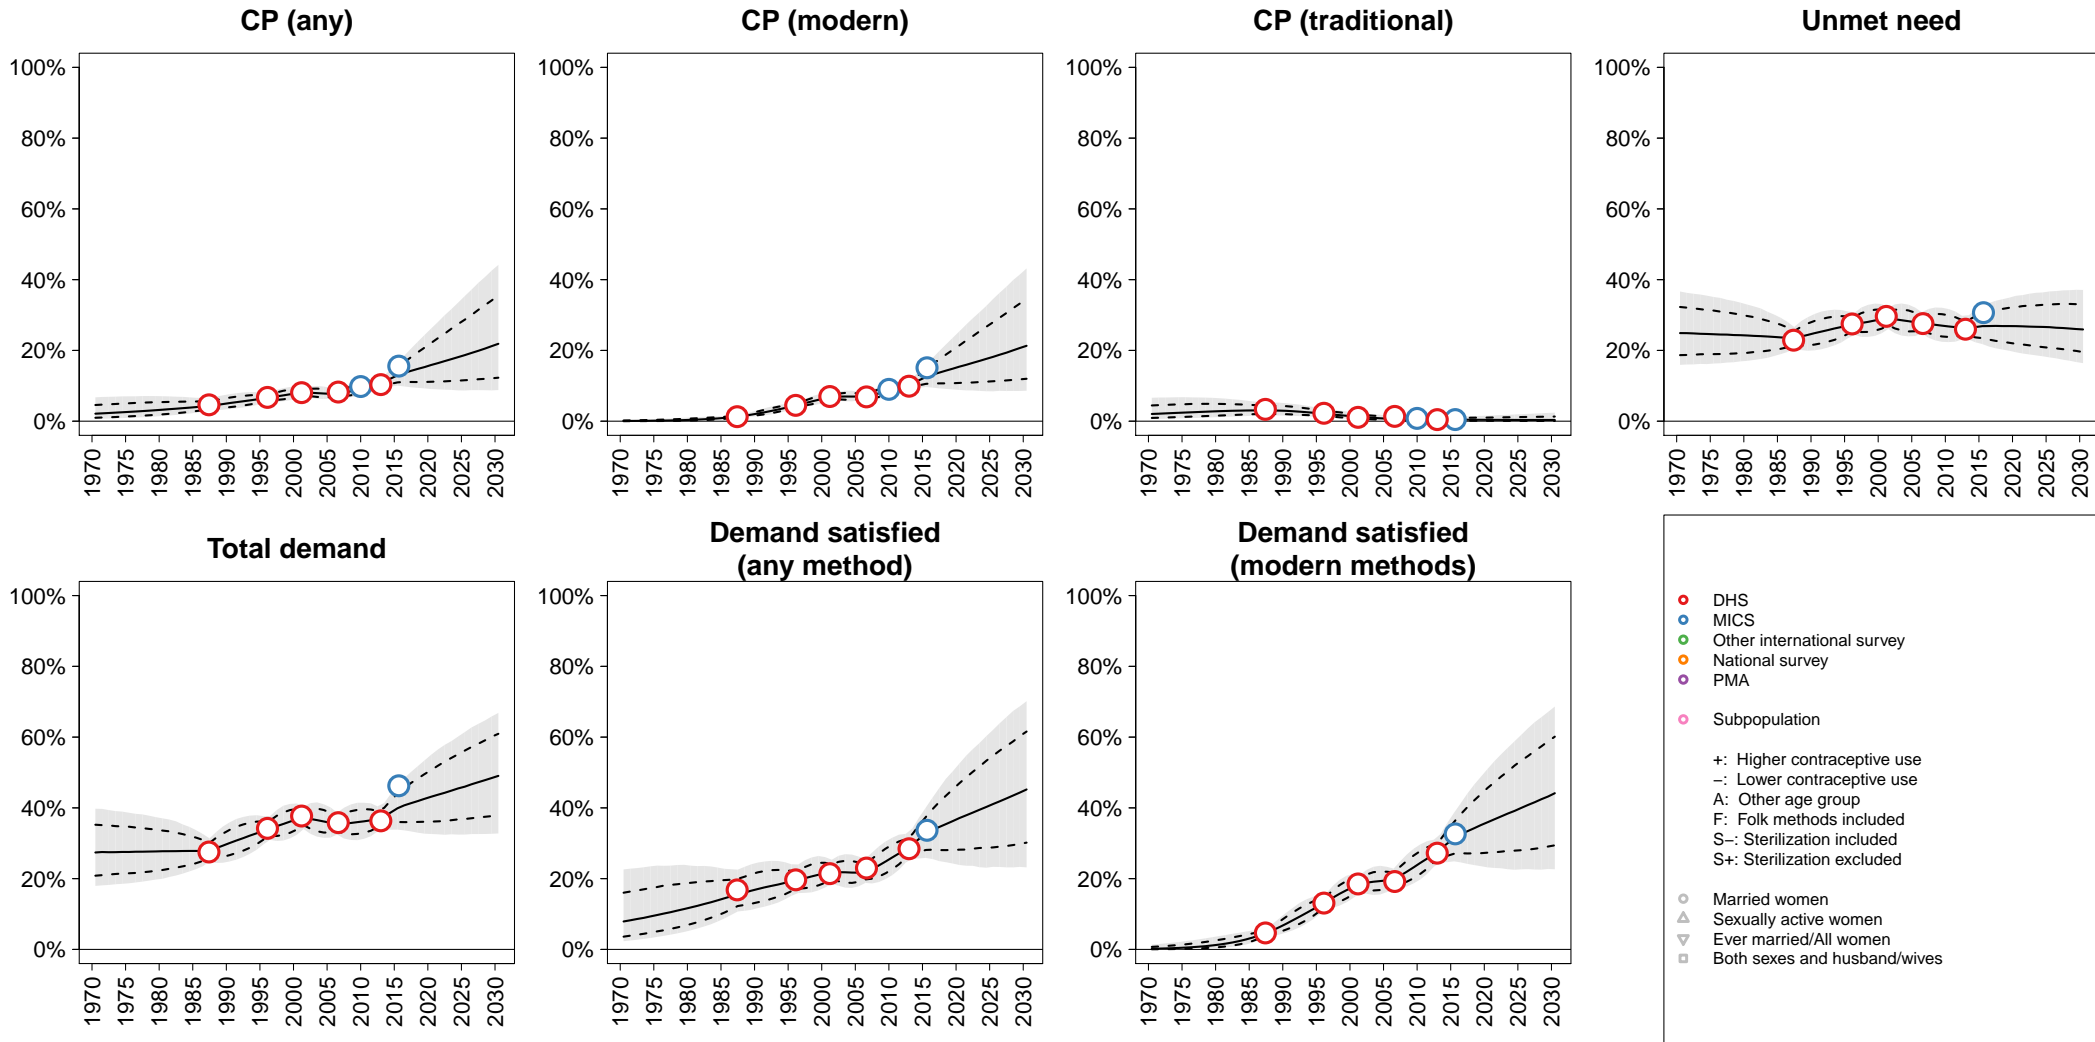

Malta (Southern Europe) --- Married / In-Union

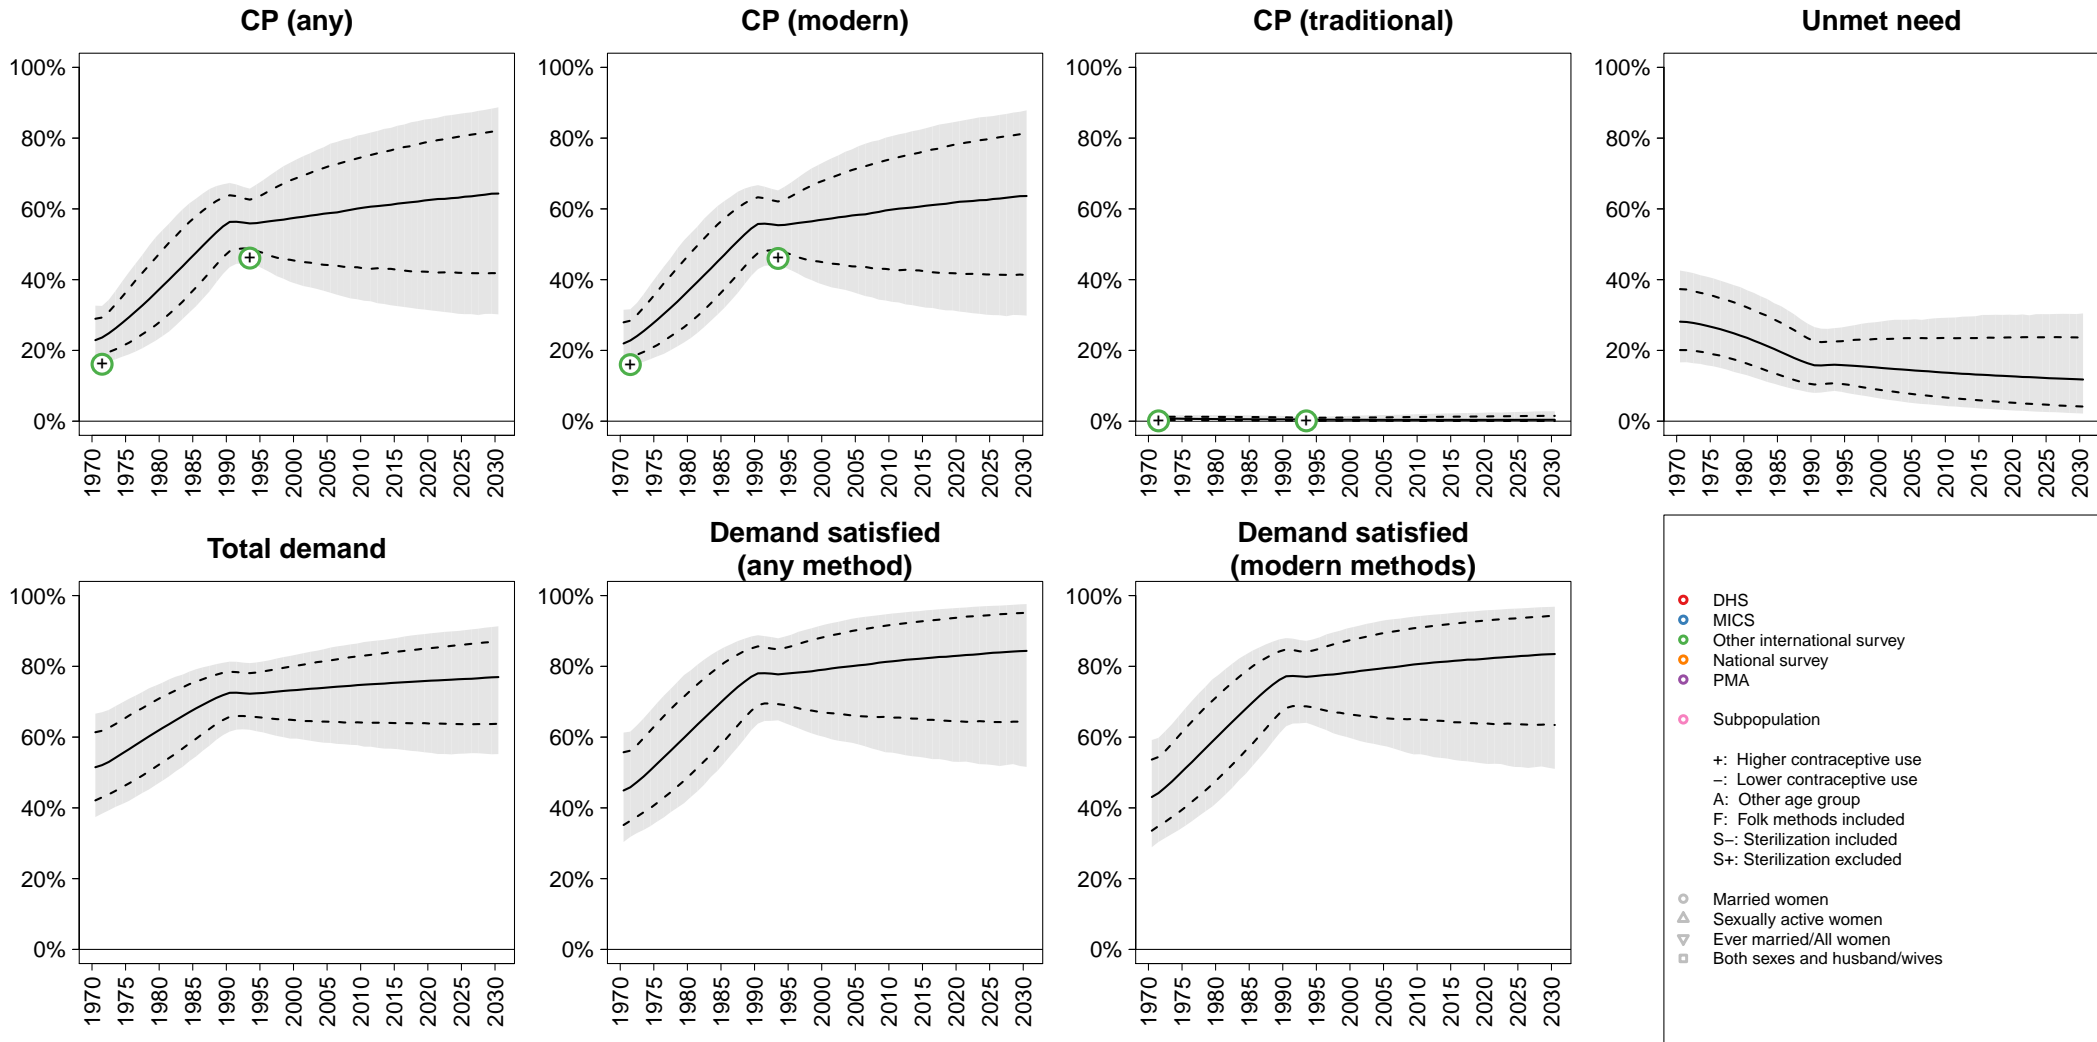

Martinique (Caribbean) --- Married / In-Union

CP (any)

CP (modern)

CP (traditional)

Unmet need

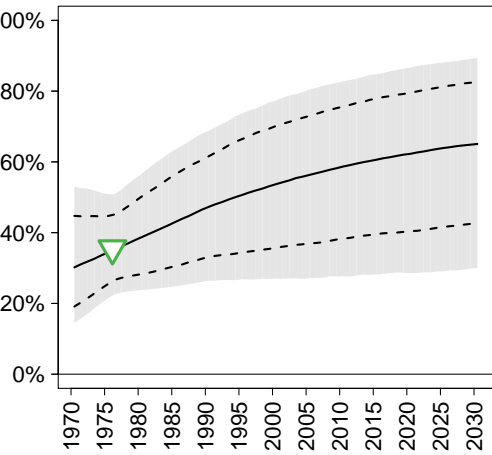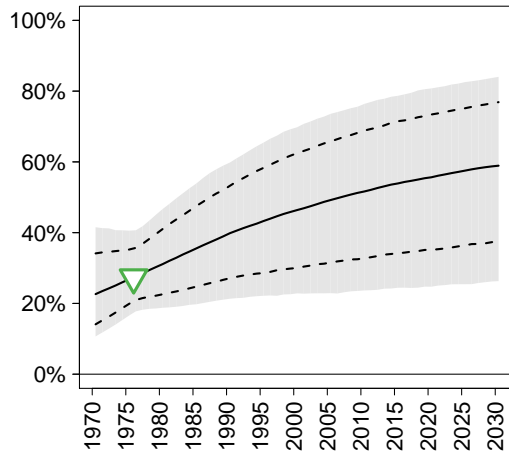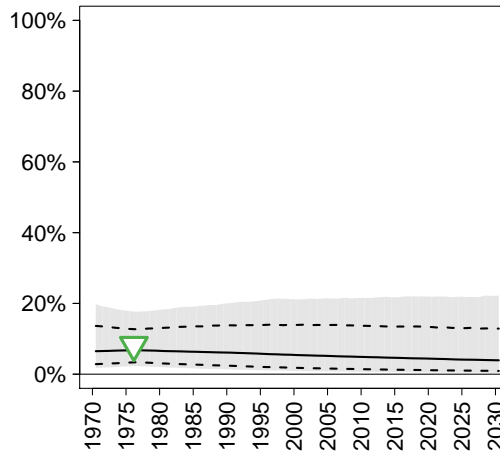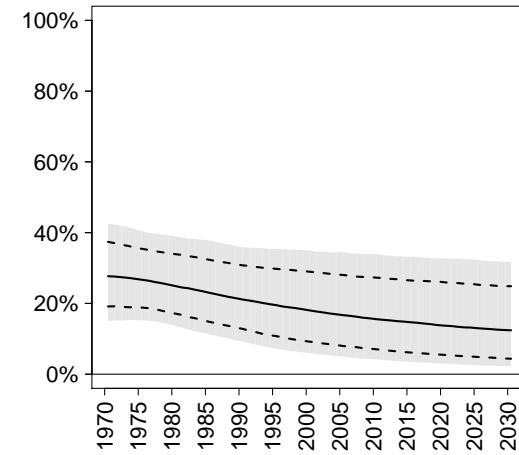

Total demand

Demand satisfied (any method)

Demand satisfied (modern methods)

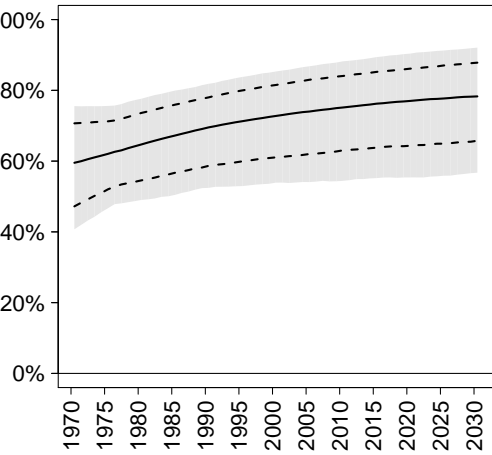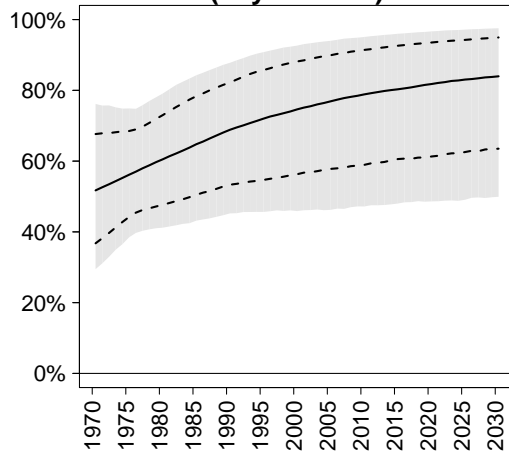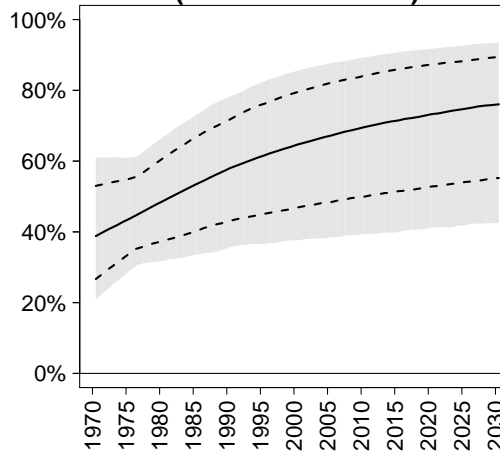



Mauritania (Western Africa) --- Married / In-Union

CP (any)

CP (modern)

CP (traditional)

Unmet need

Total demand

Demand satisfied (any method)

Demand satisfied (modern methods)

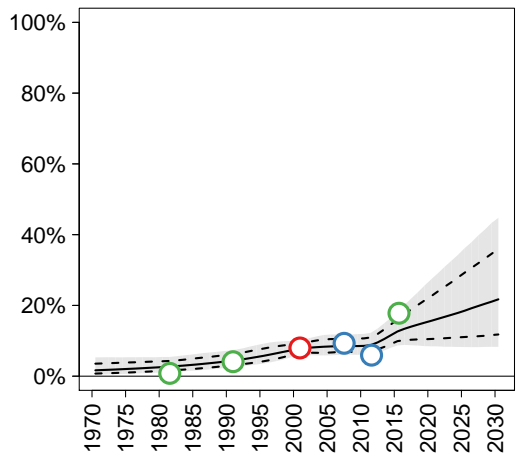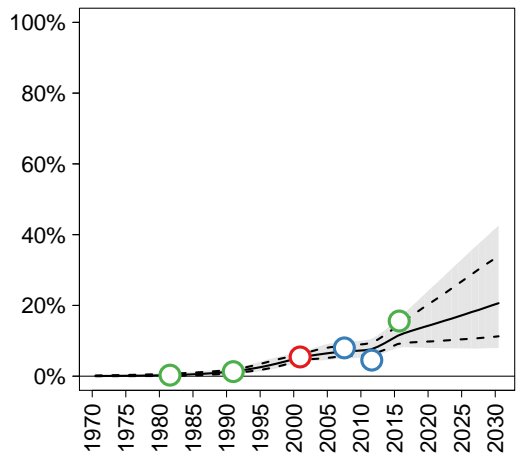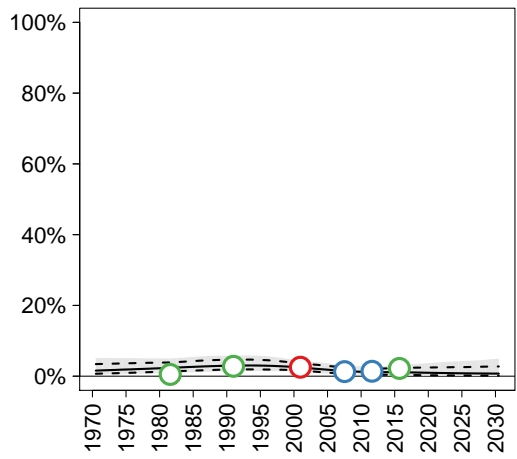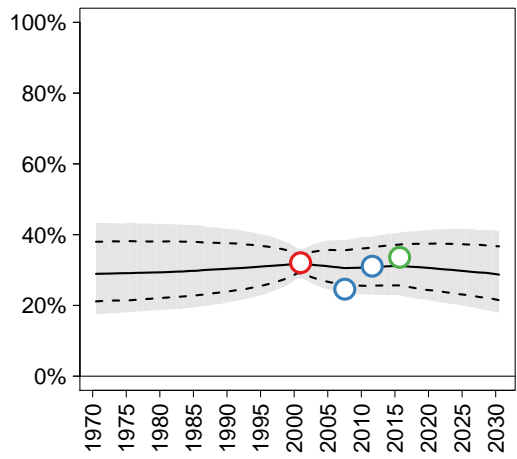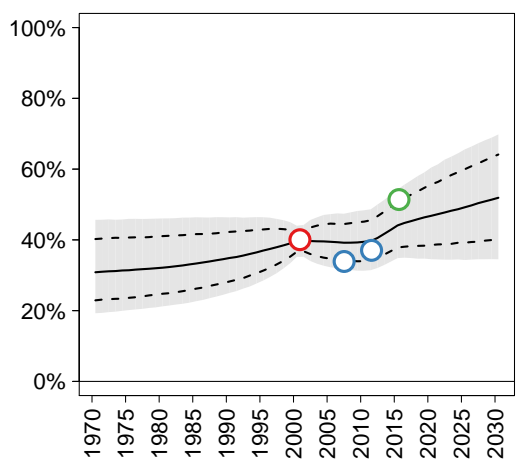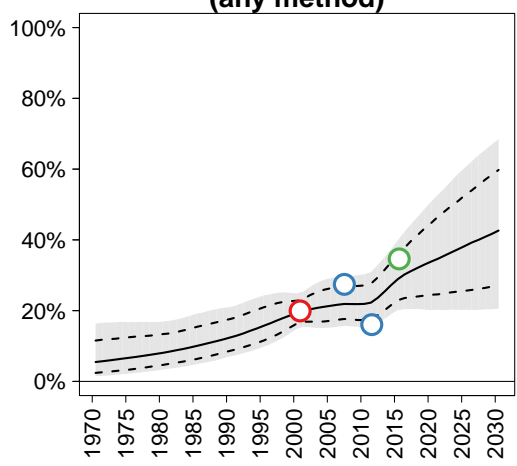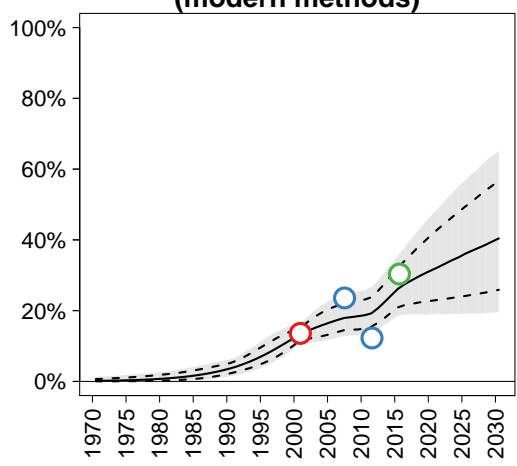

Mauritius (Eastern Africa) --- Married / In-Union

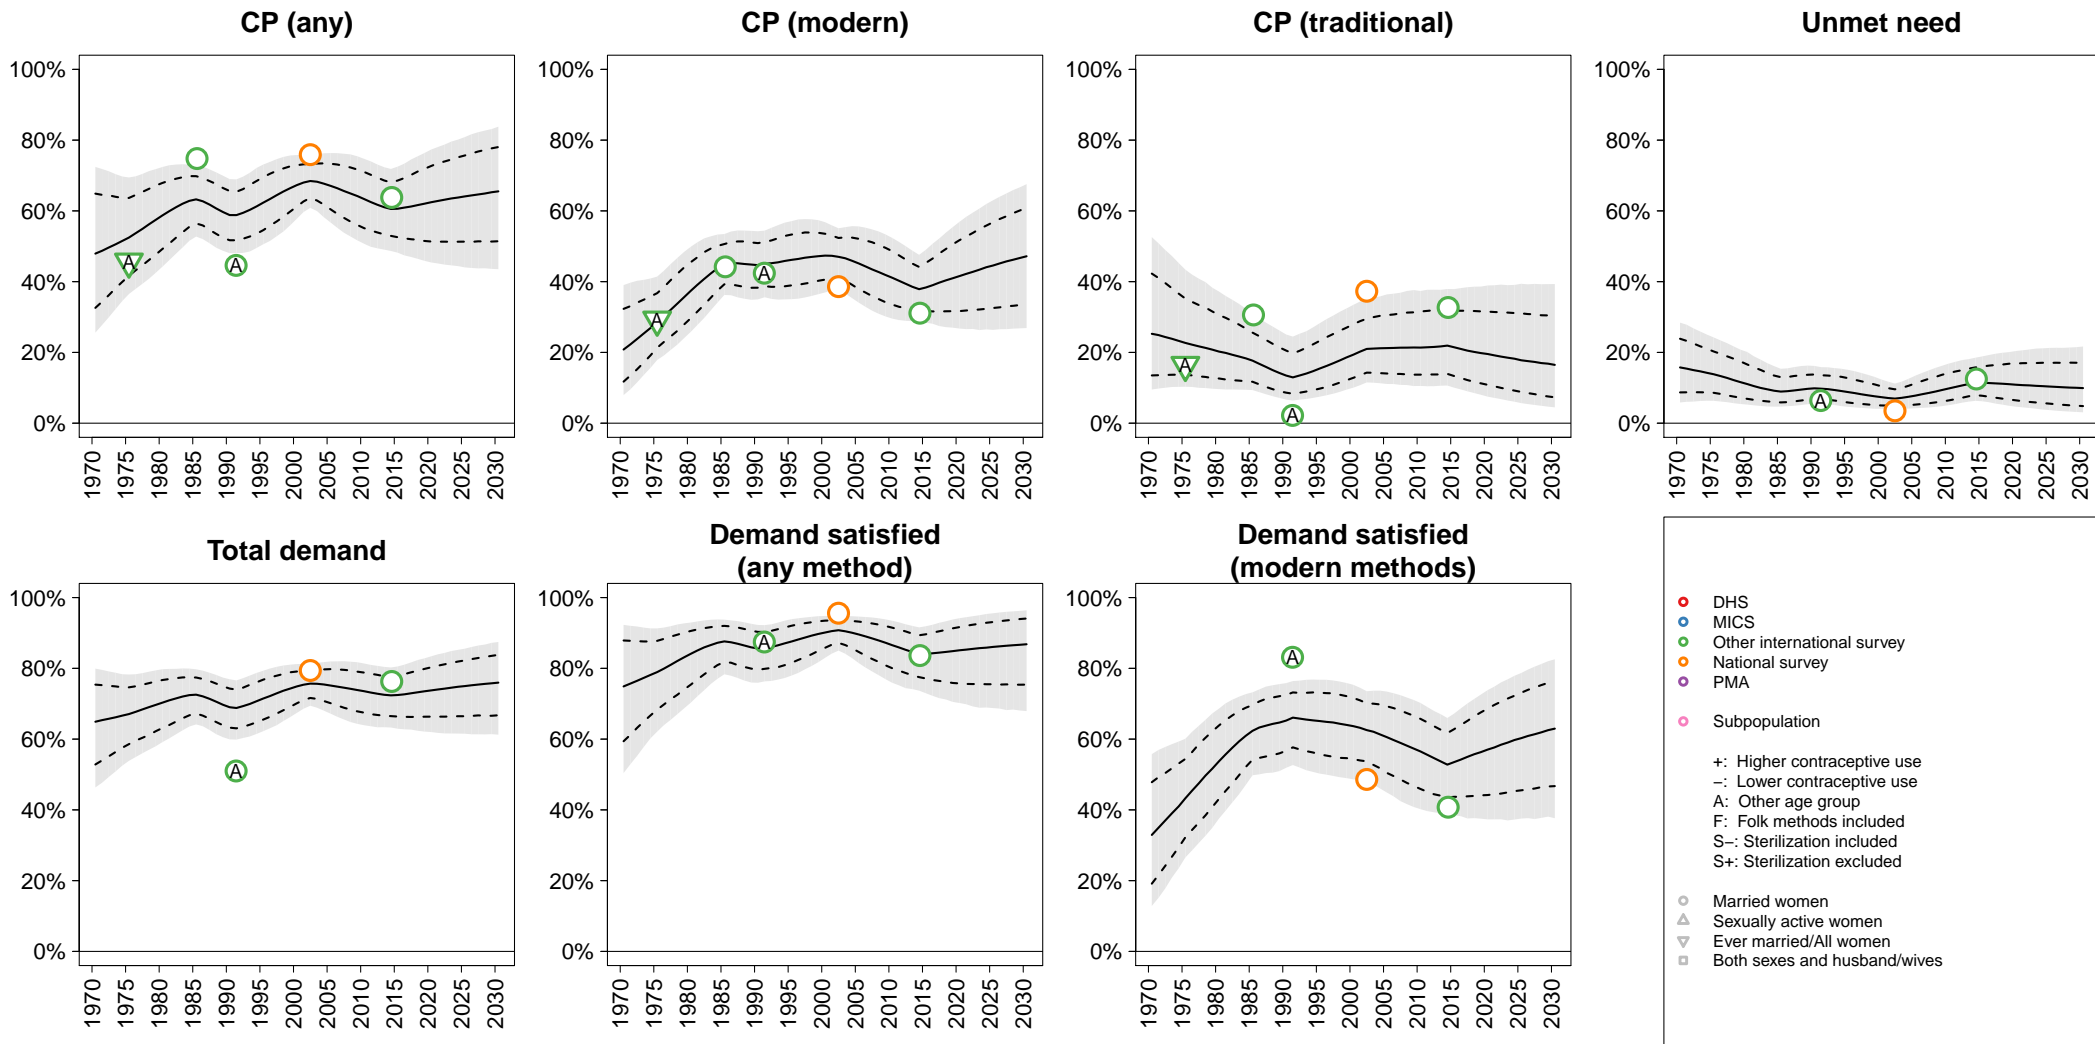

Mexico (Central America) --- Married / In-Union

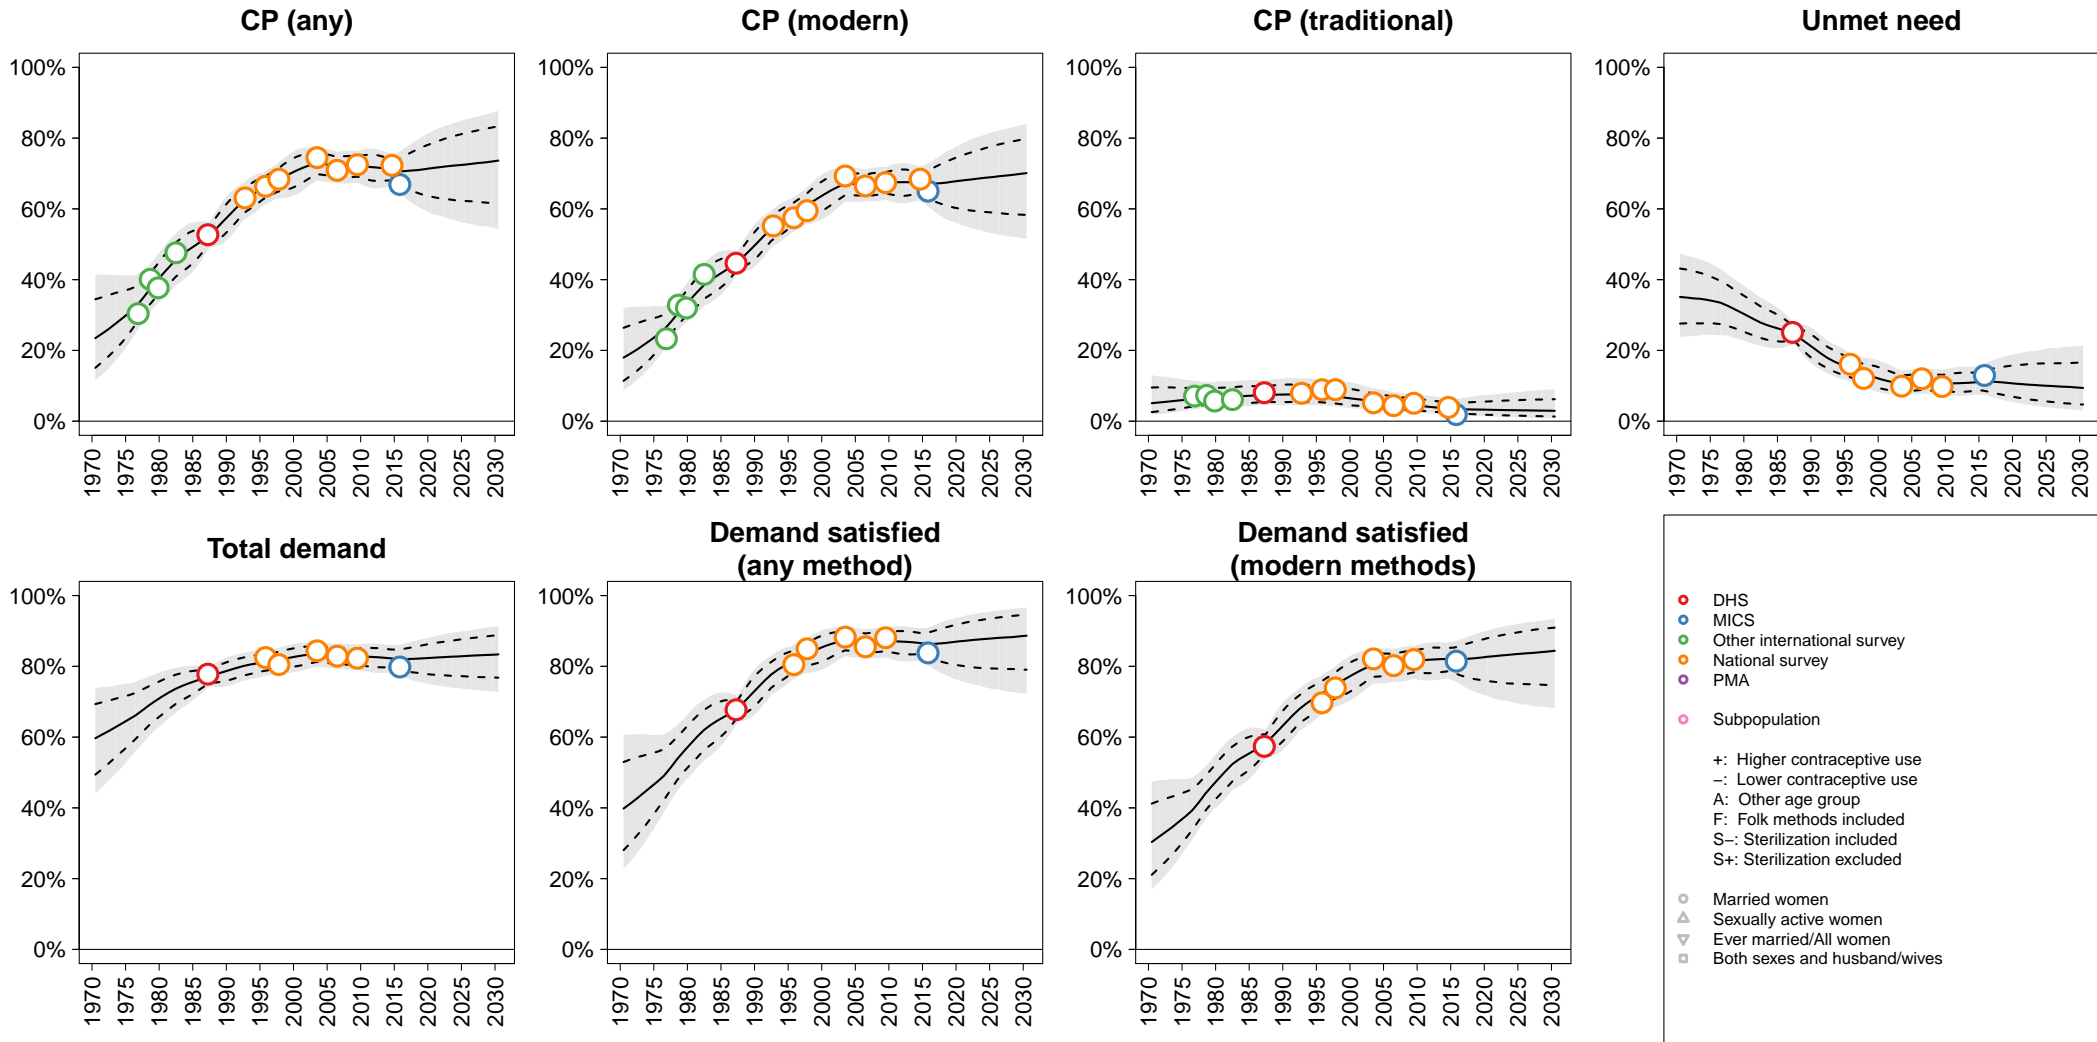

Mongolia (Eastern Asia) --- Married / In-Union

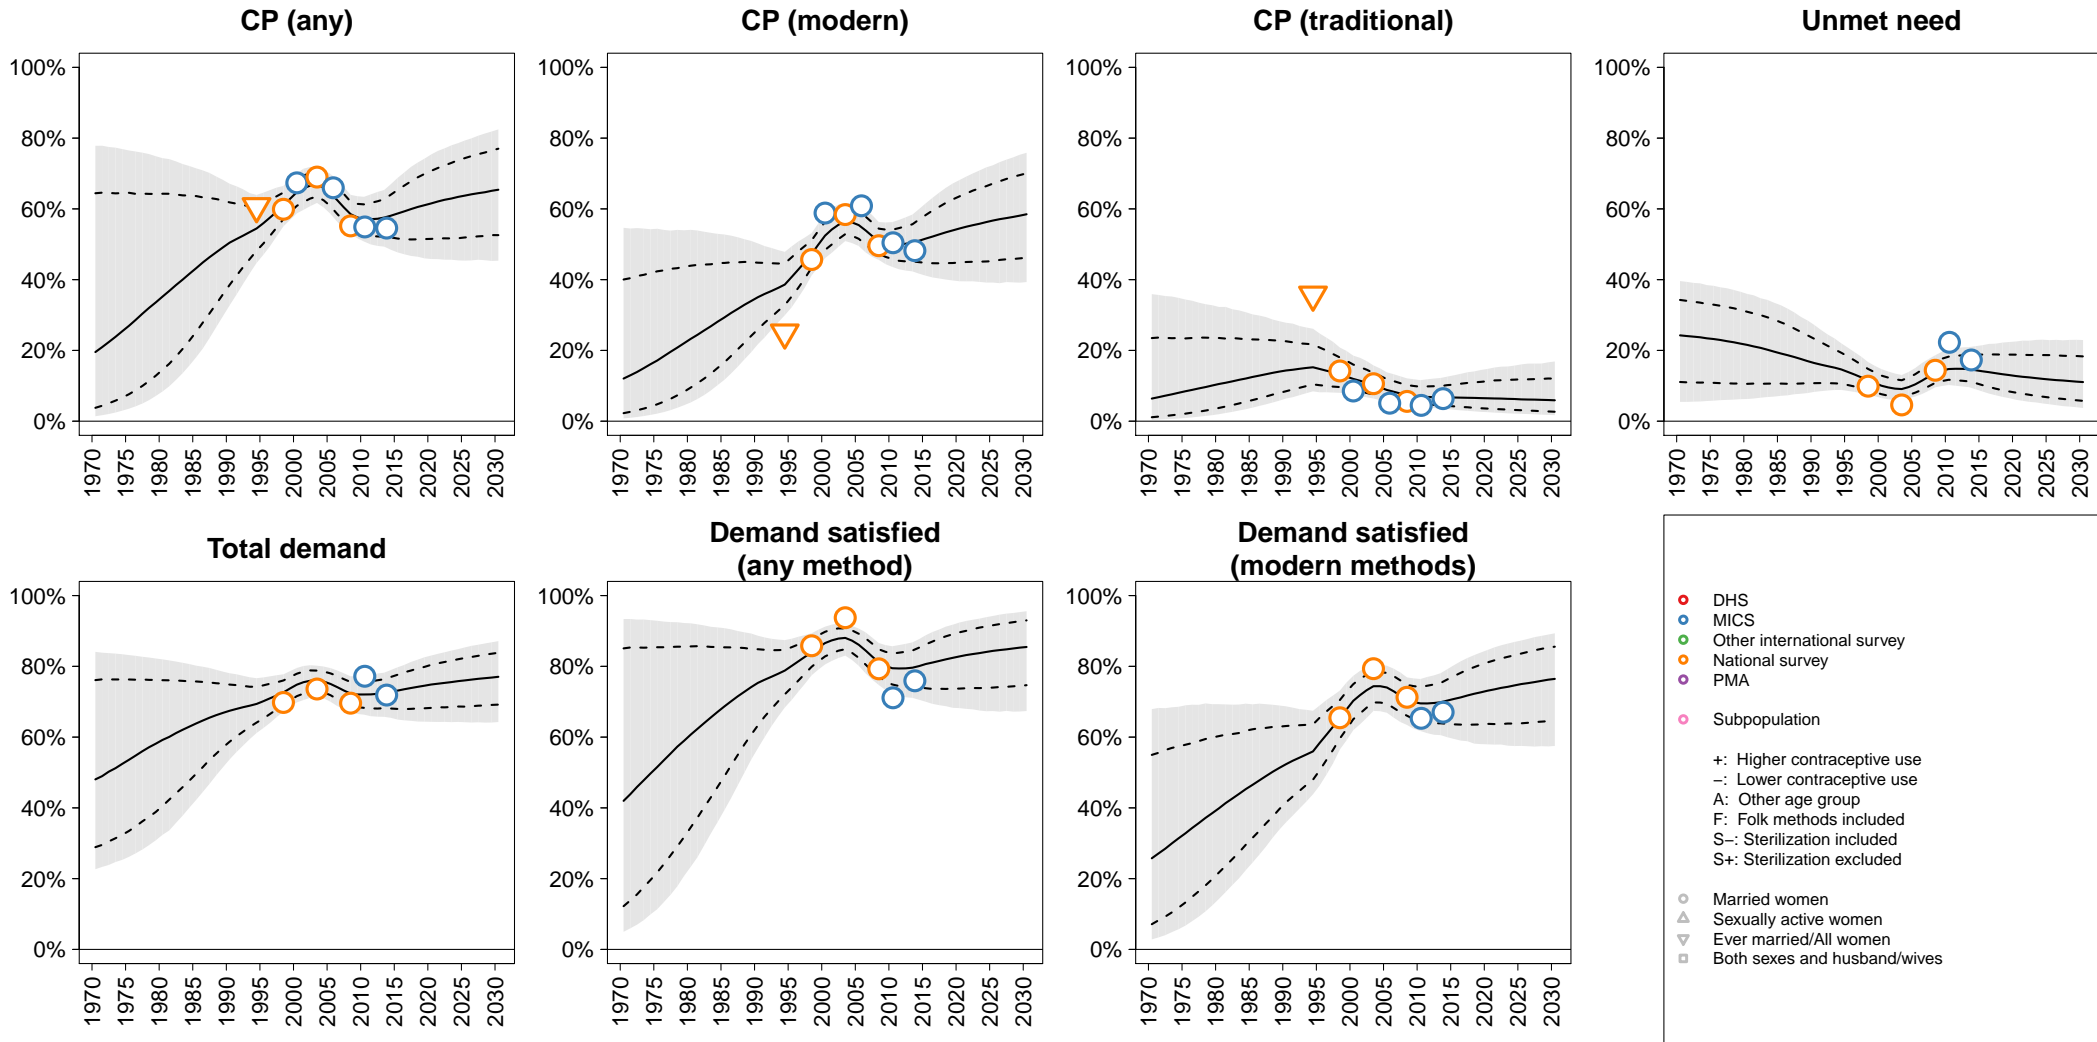

Montenegro (Southern Europe) --- Married / In-Union

CP (any)

CP (modern)

CP (traditional)

Unmet need

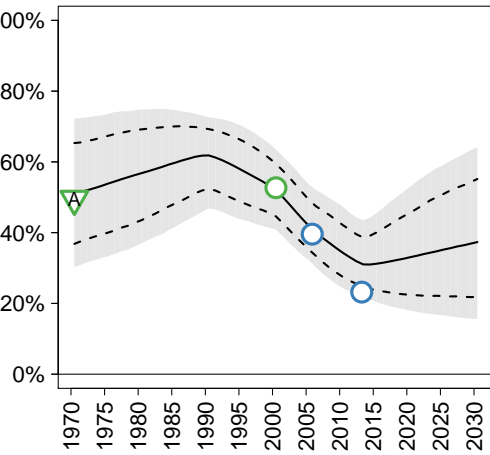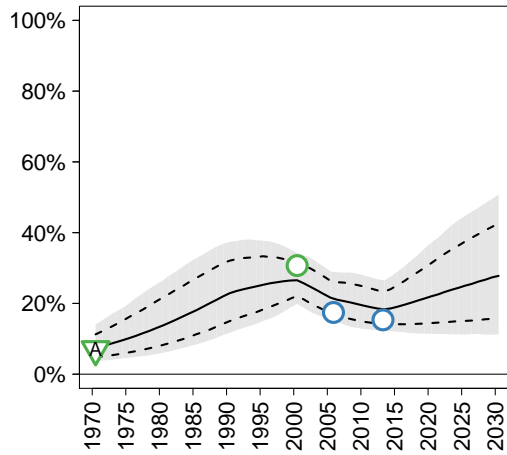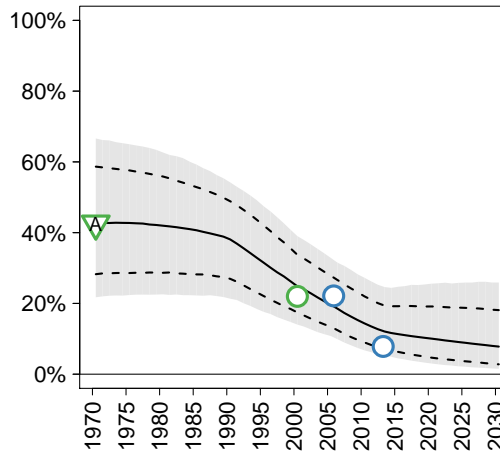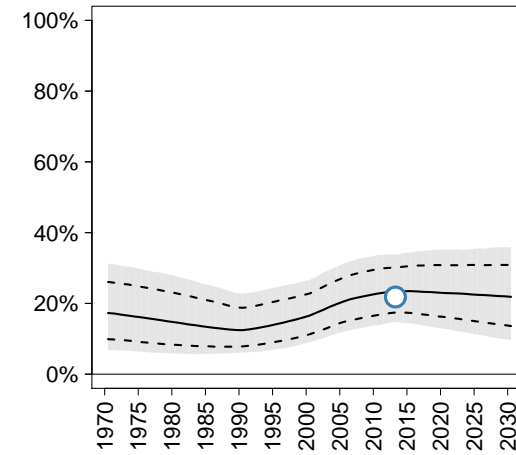

Total demand

Demand satisfied (any method)

Demand satisfied (modern methods)

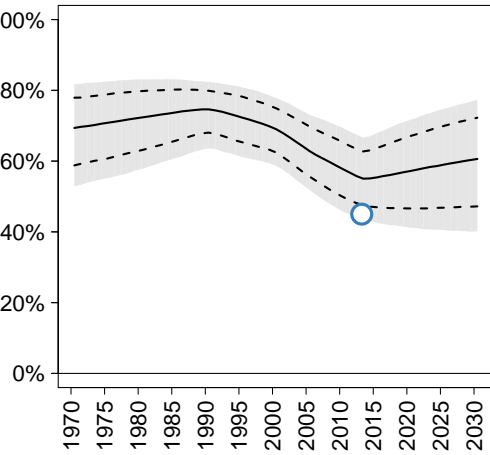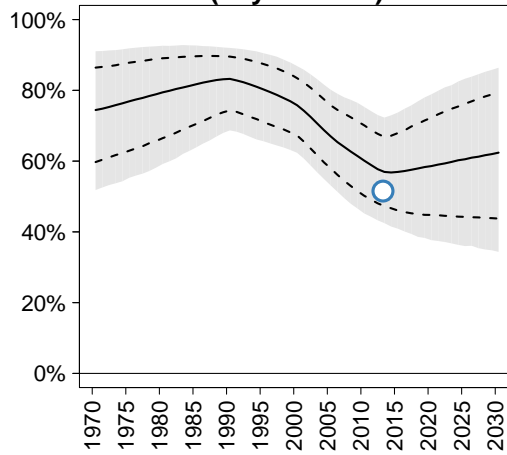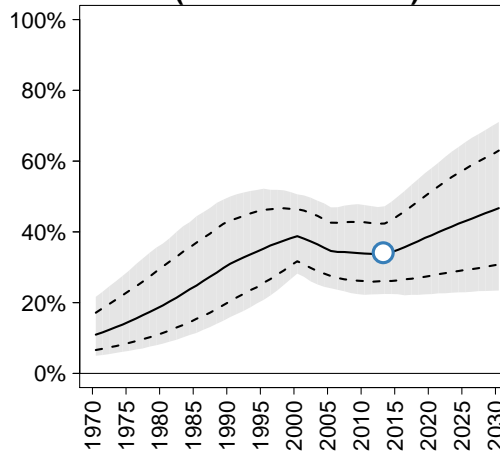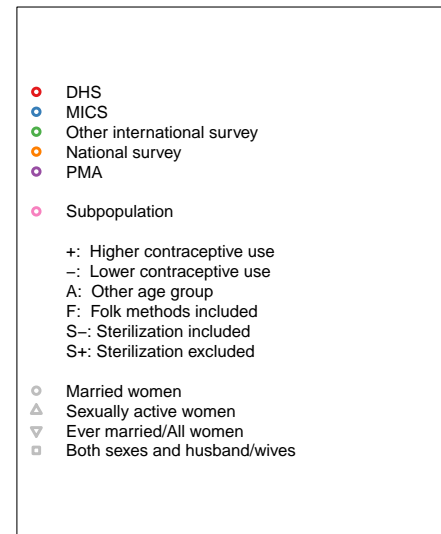

Morocco (Northern Africa) --- Married / In-Union

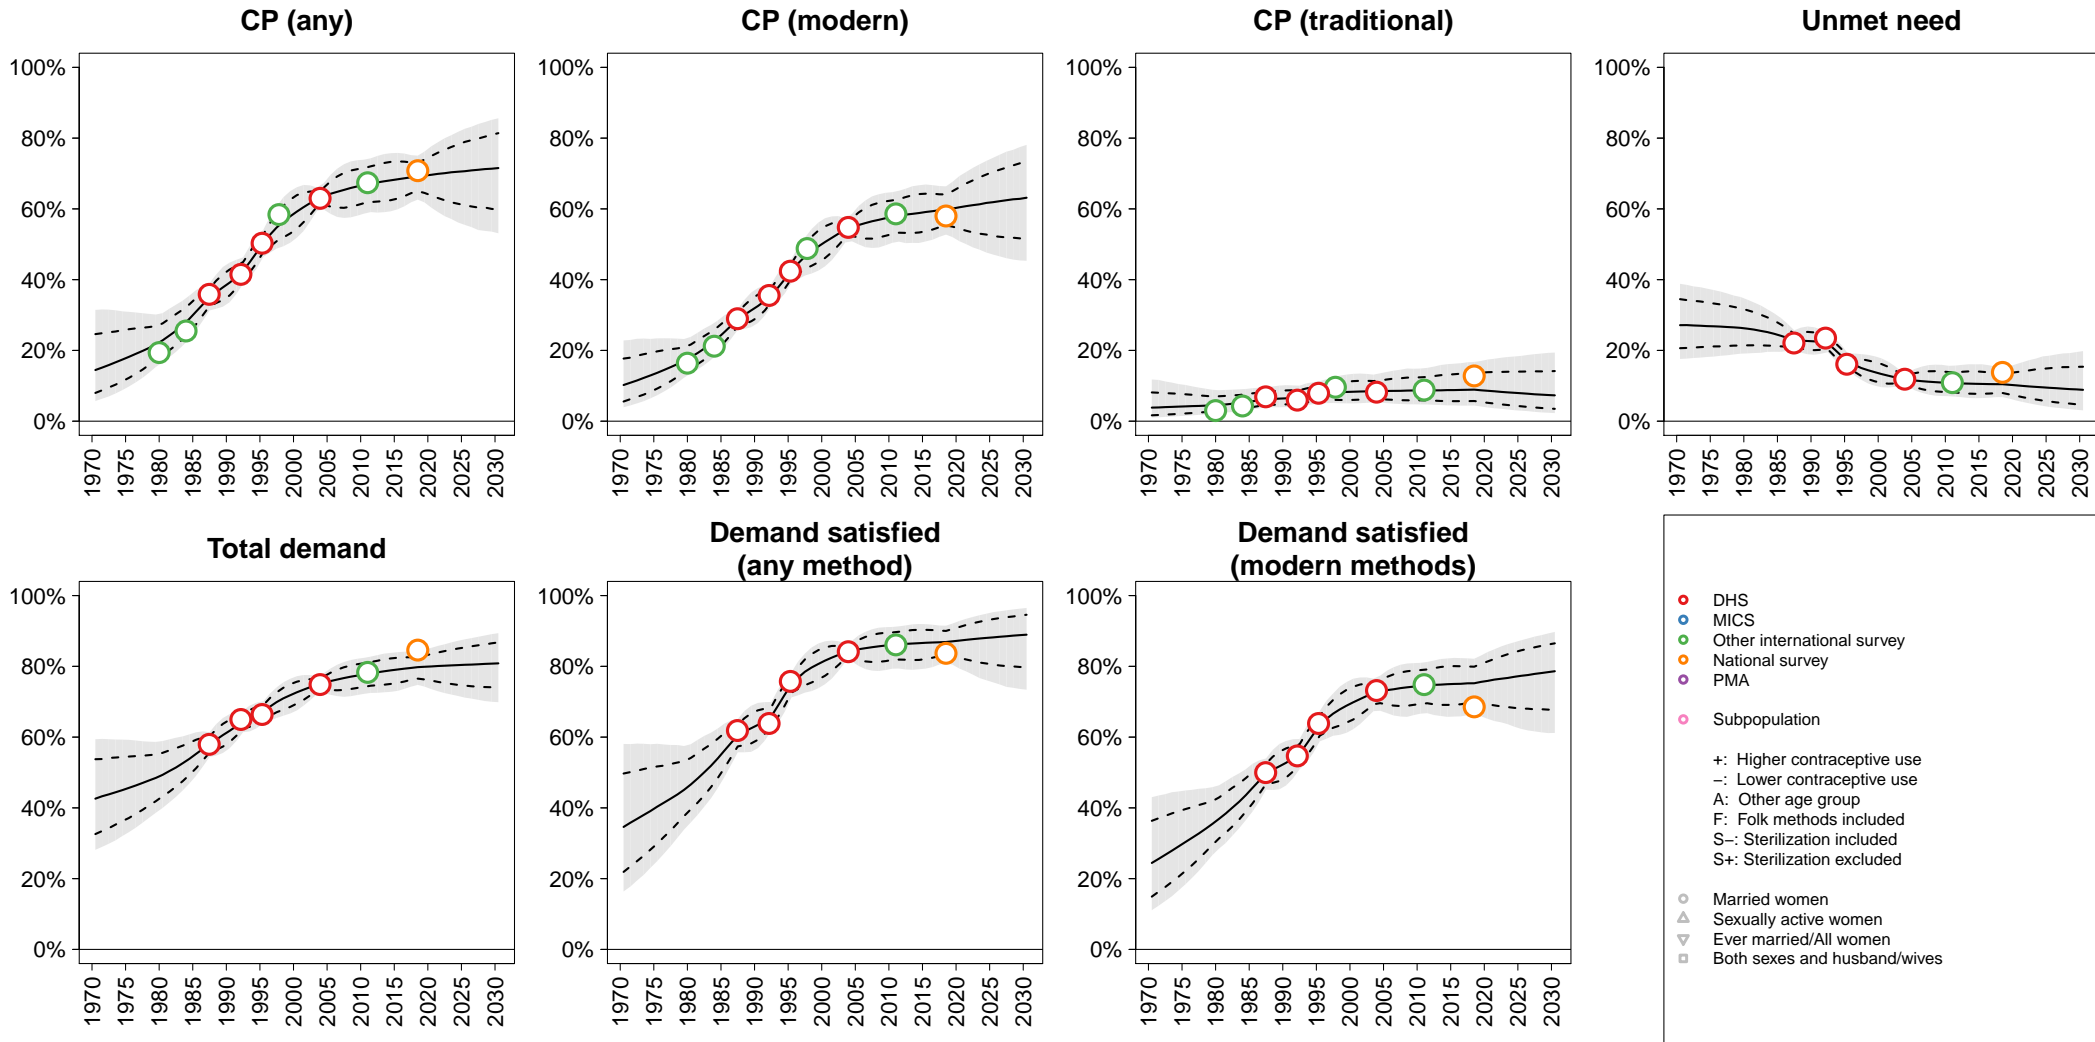

Mozambique (Eastern Africa) --- Married / In-Union

CP (any)

CP (modern)

CP (traditional)

Unmet need

Total demand

Demand satisfied (any method)

Demand satisfied (modern methods)



Myanmar (South-eastern Asia) --- Married / In-Union

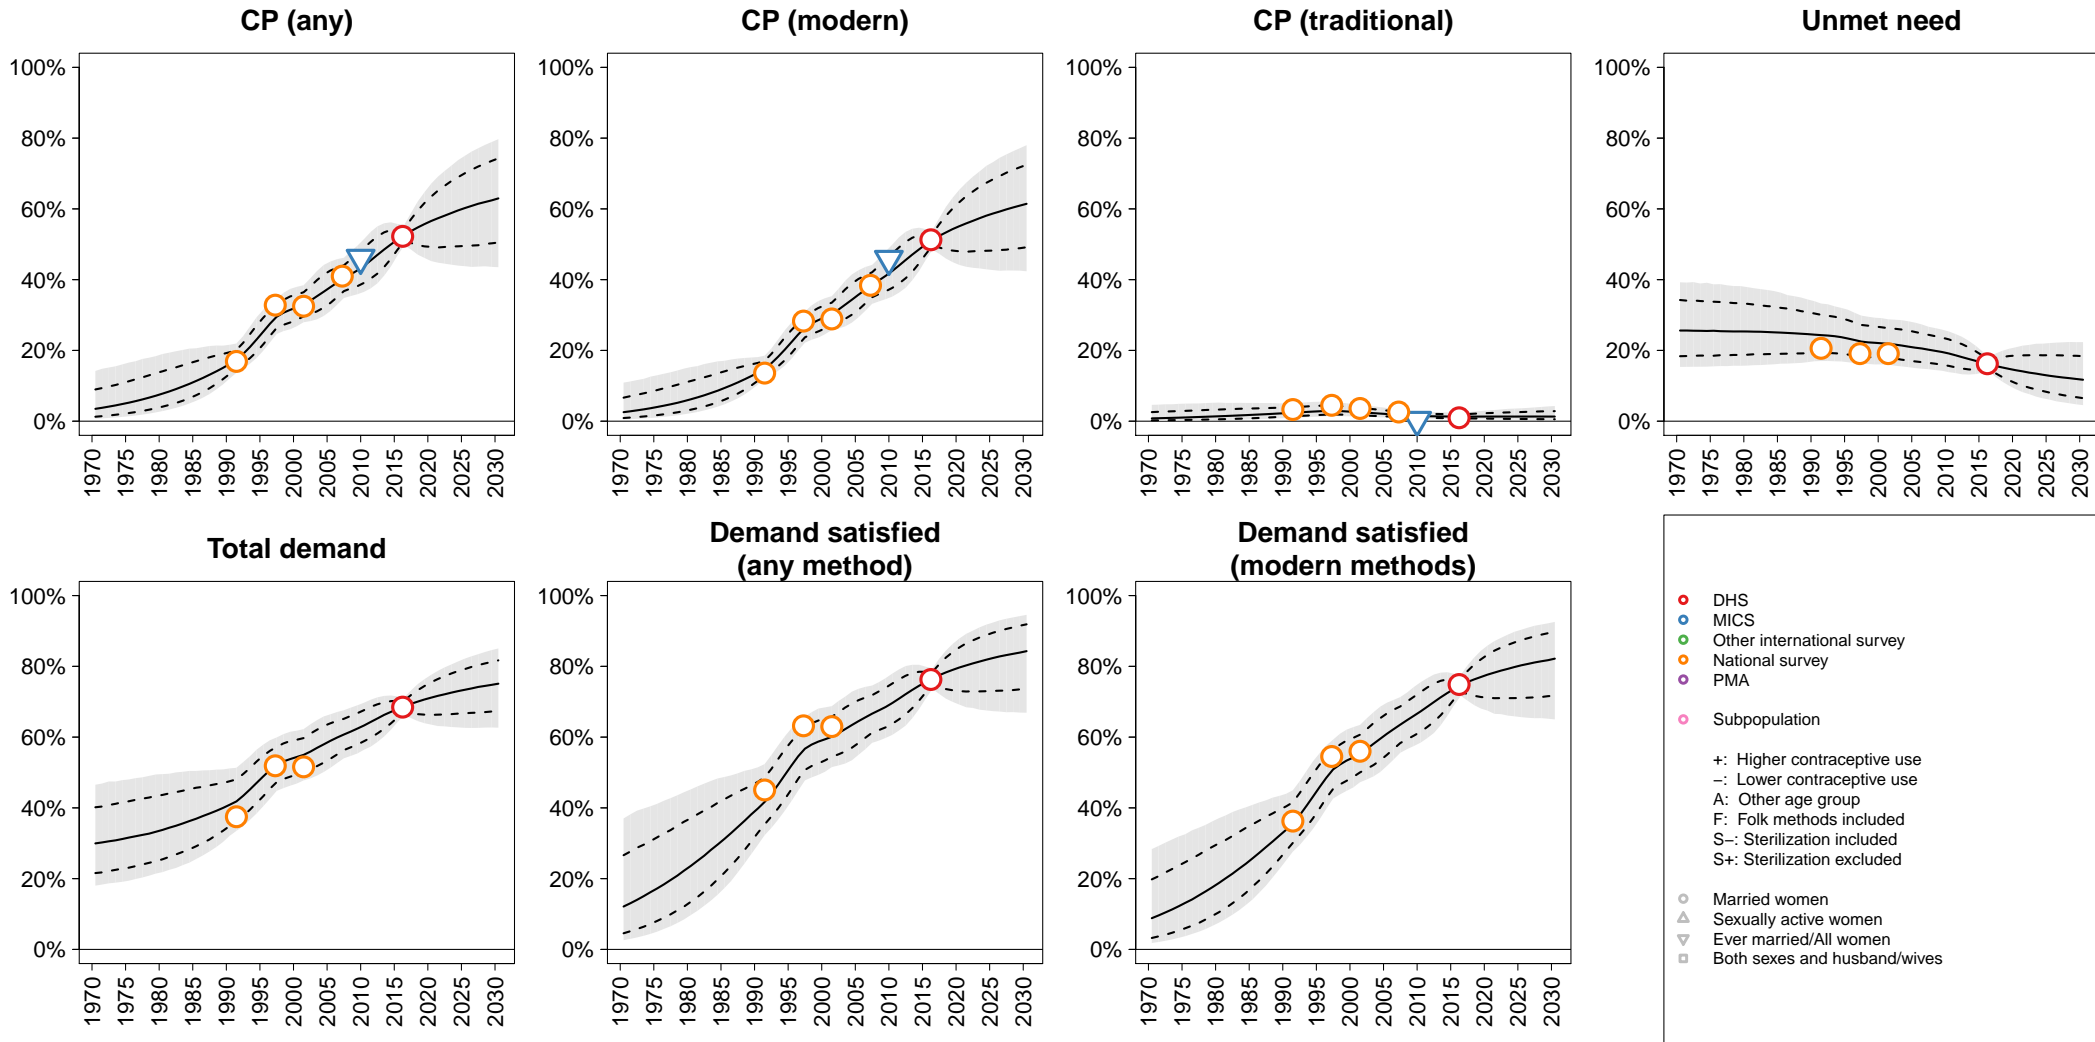



Namibia (Southern Africa) --- Married / In-Union

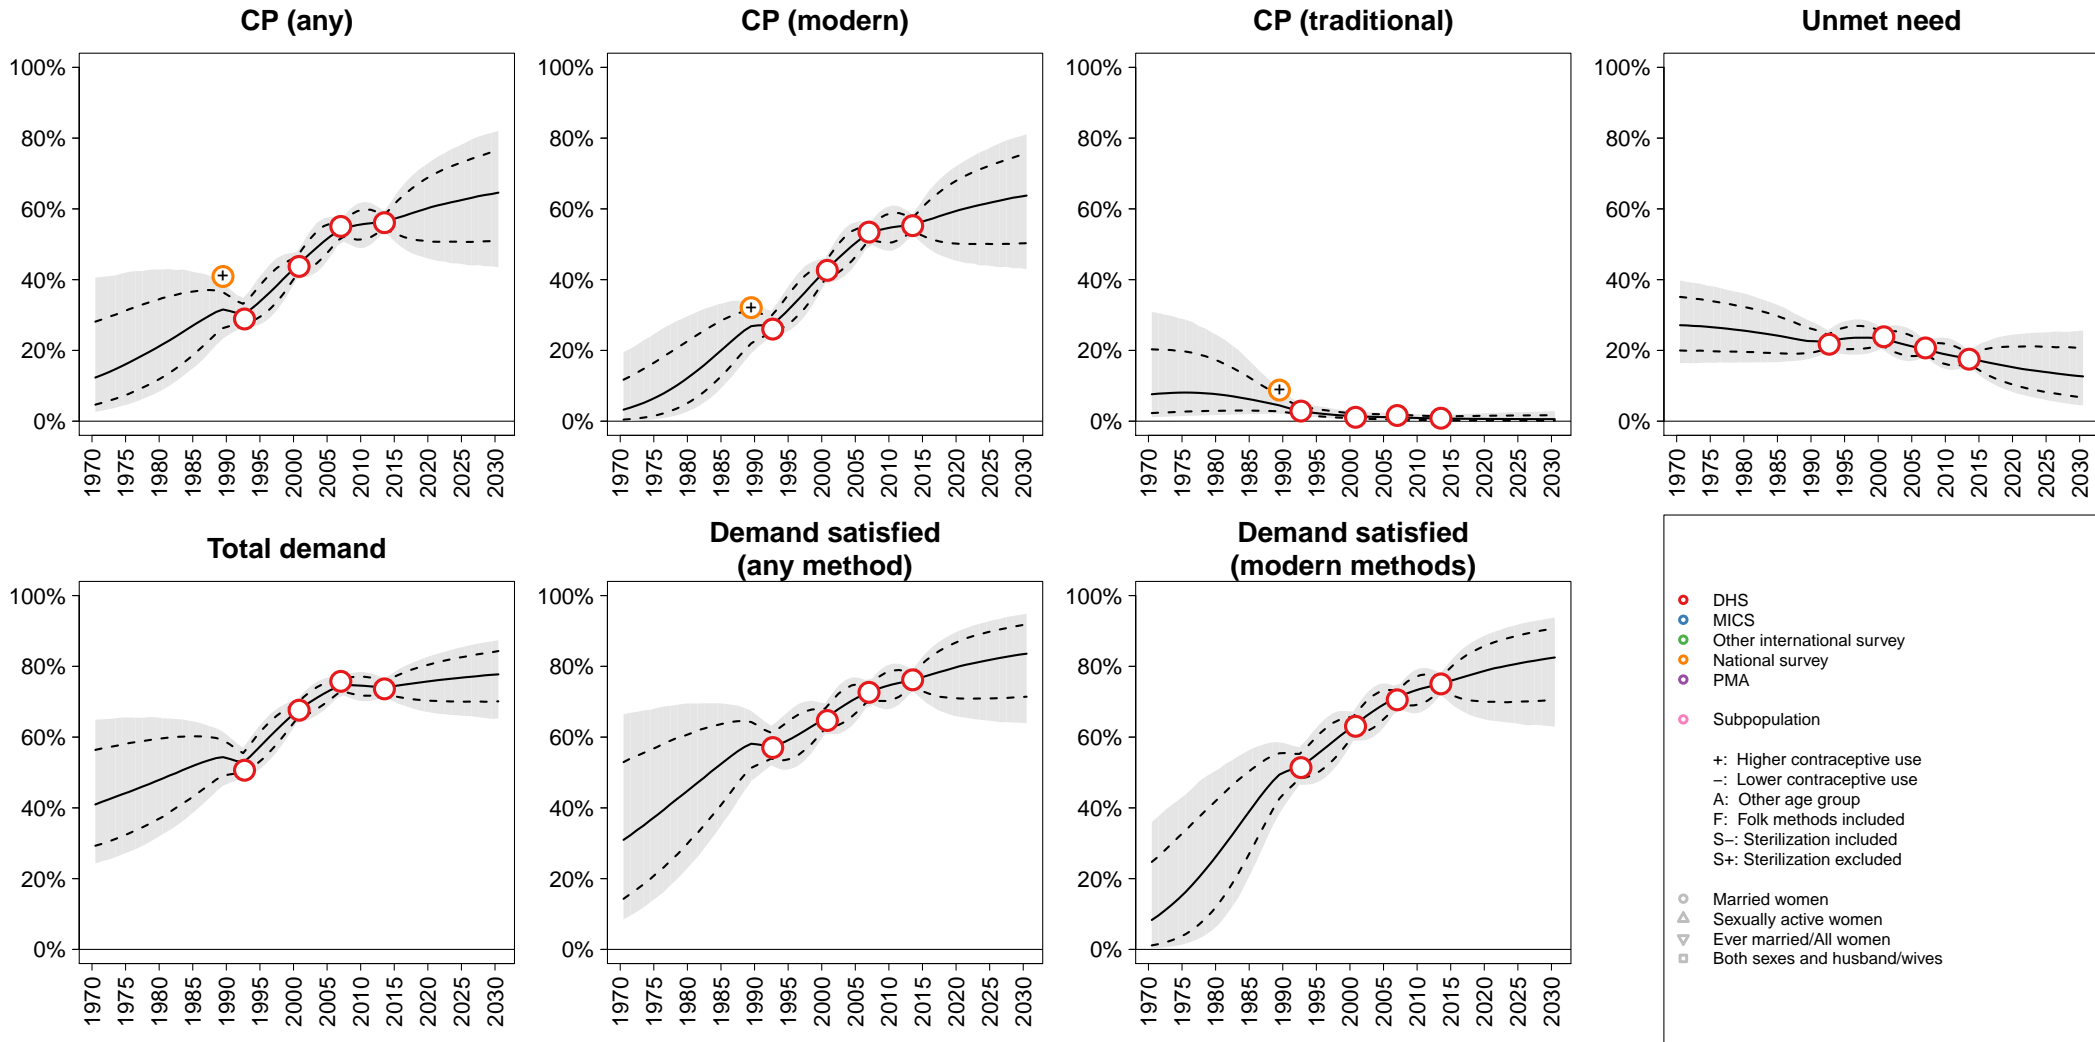

Nepal (Southern Asia) --- Married / In-Union

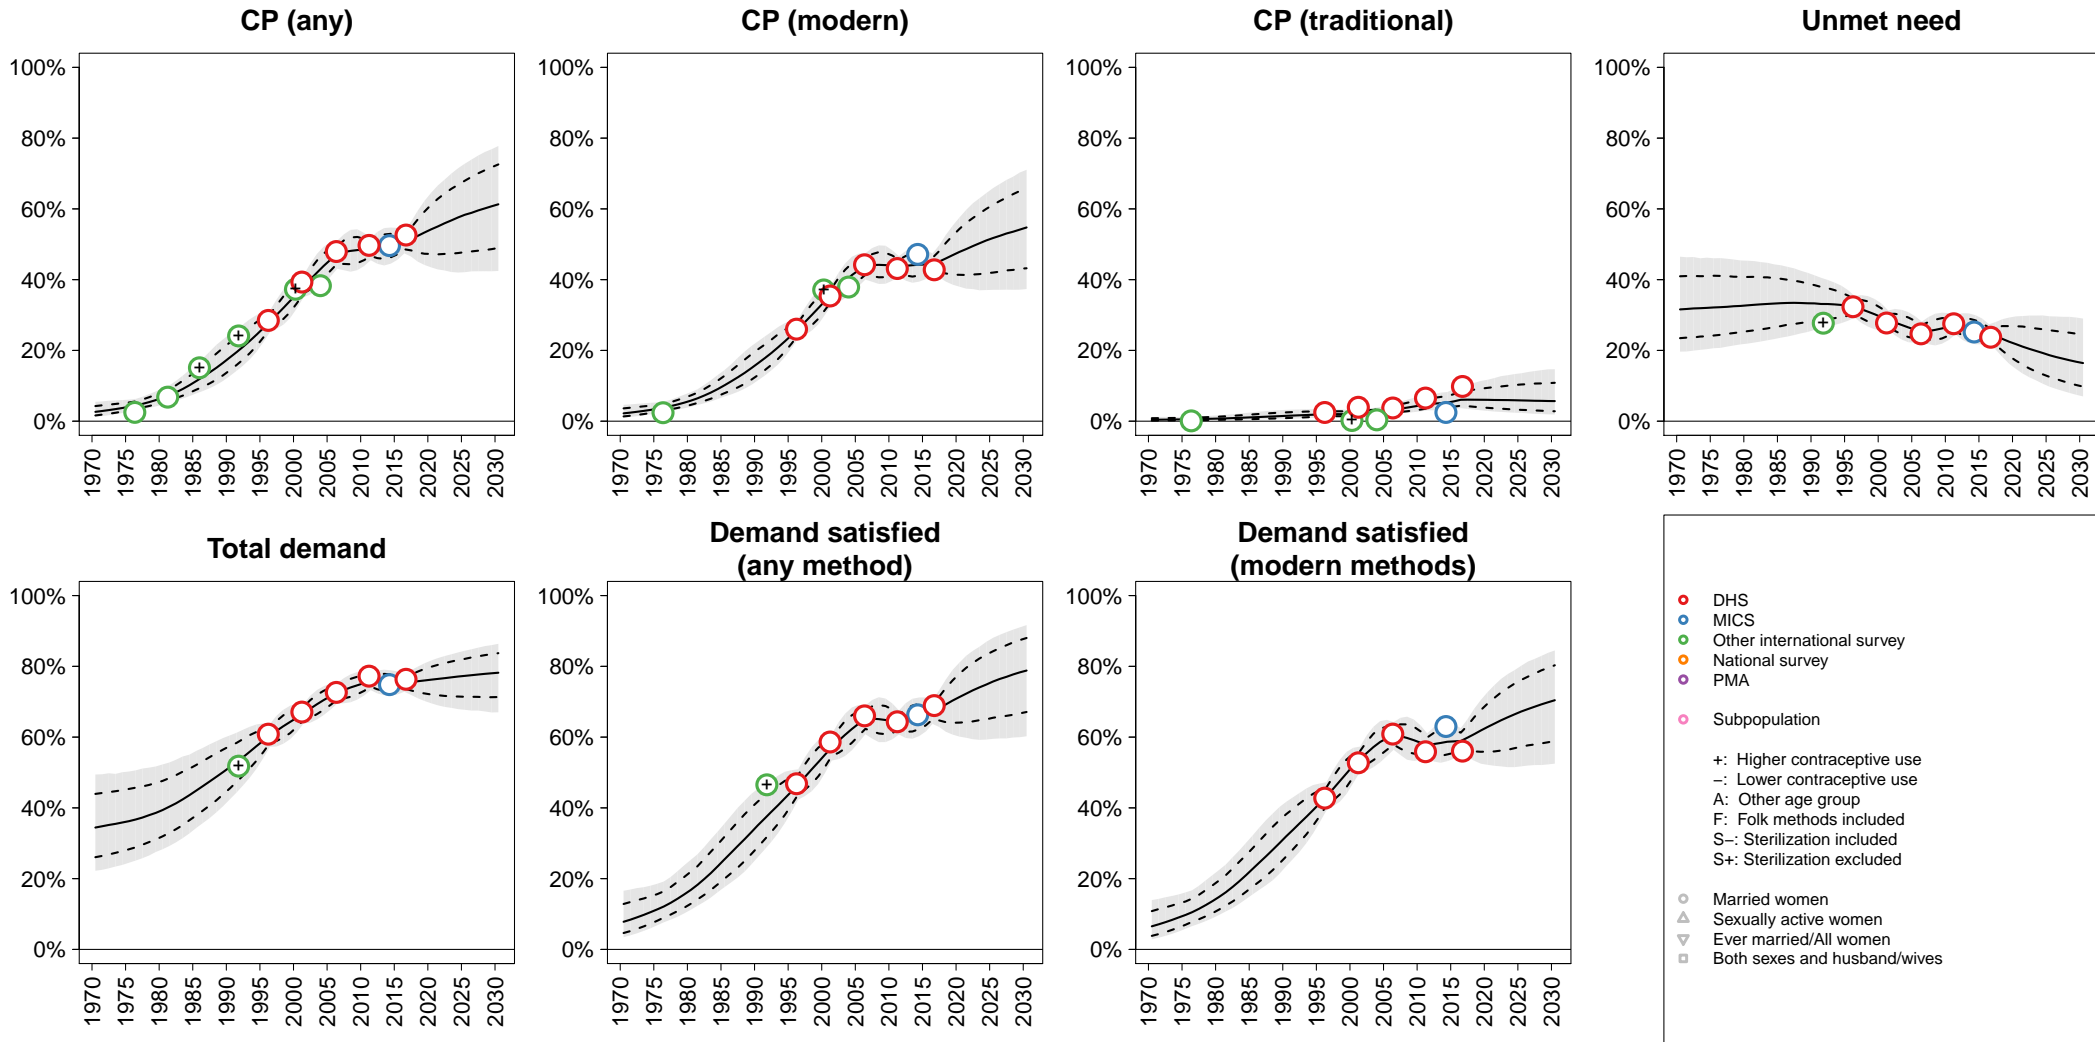

Netherlands (Western Europe) --- Married / In-Union

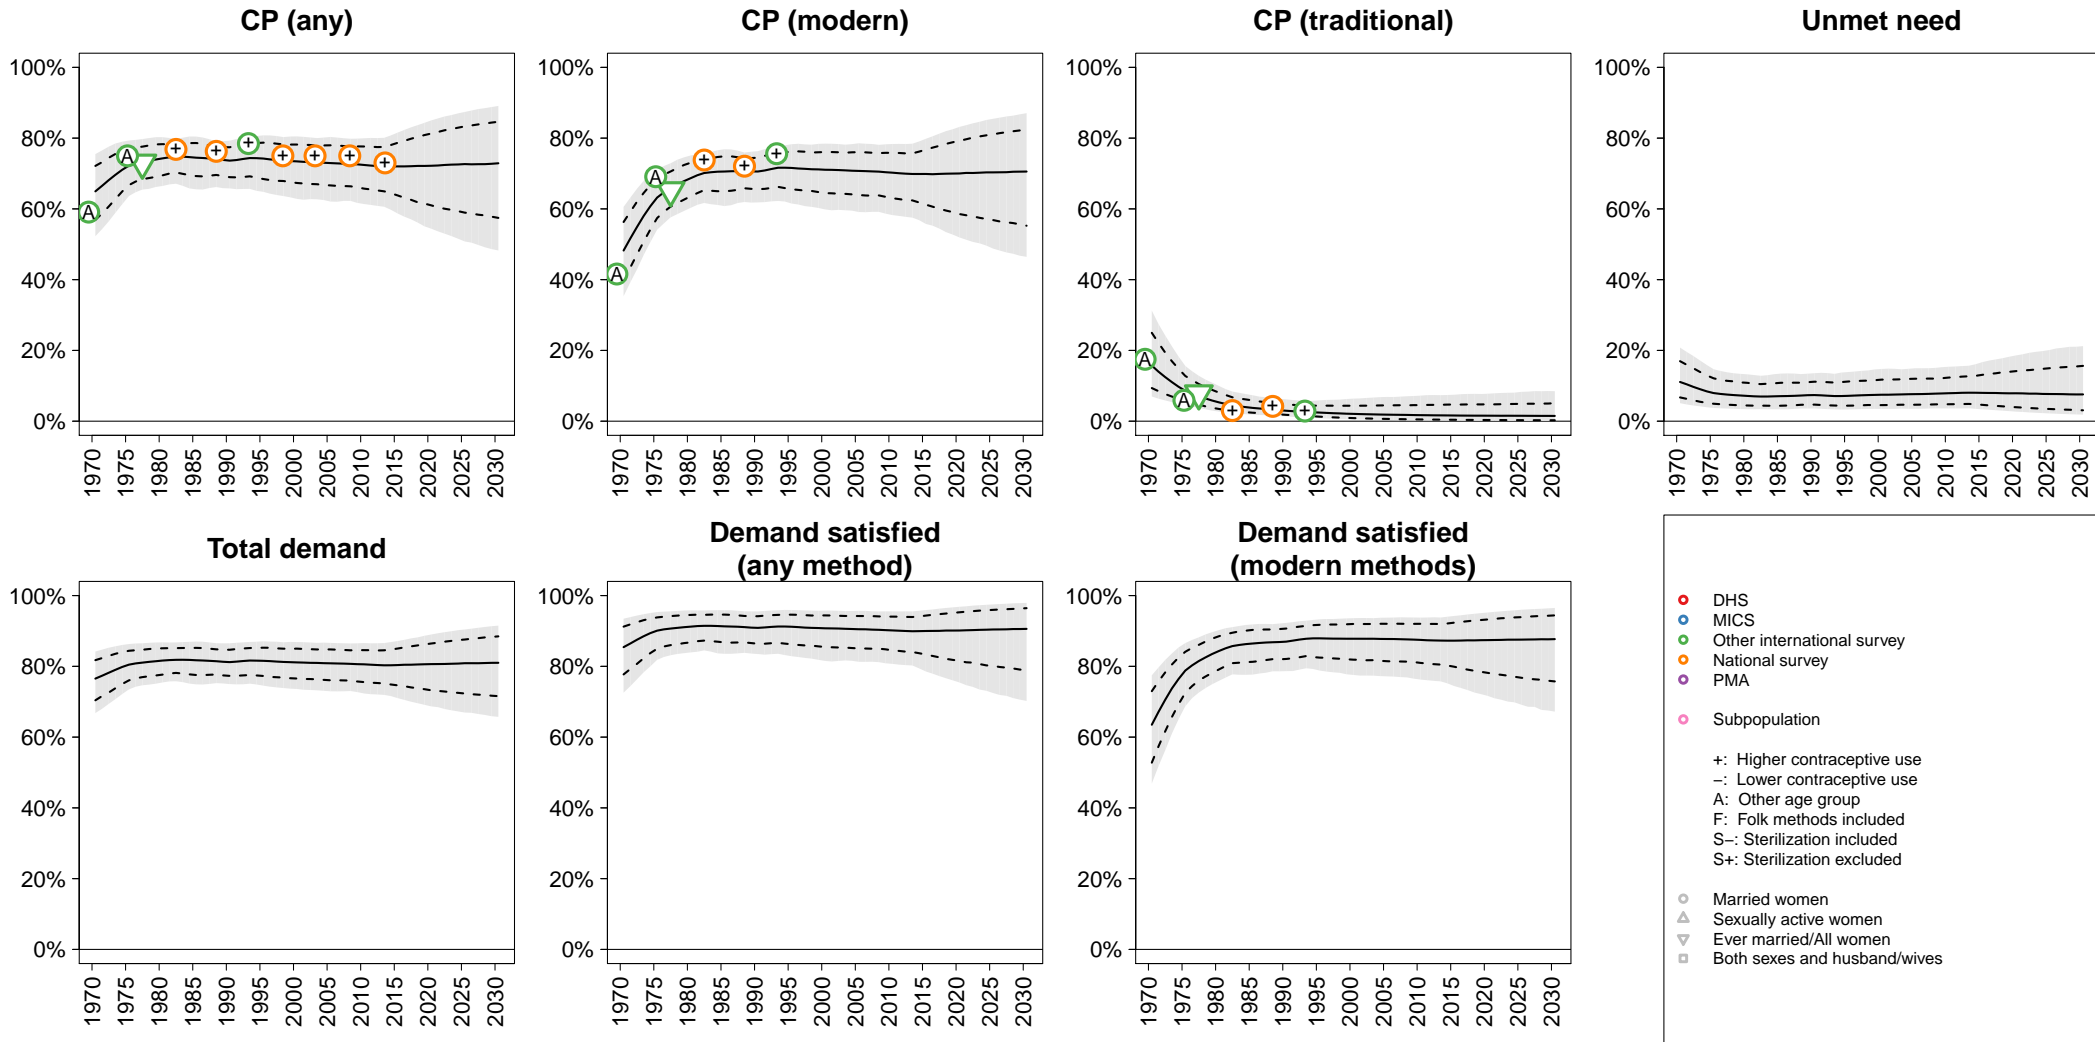

New Zealand (Australia and New Zealand) --- Married / In-Union

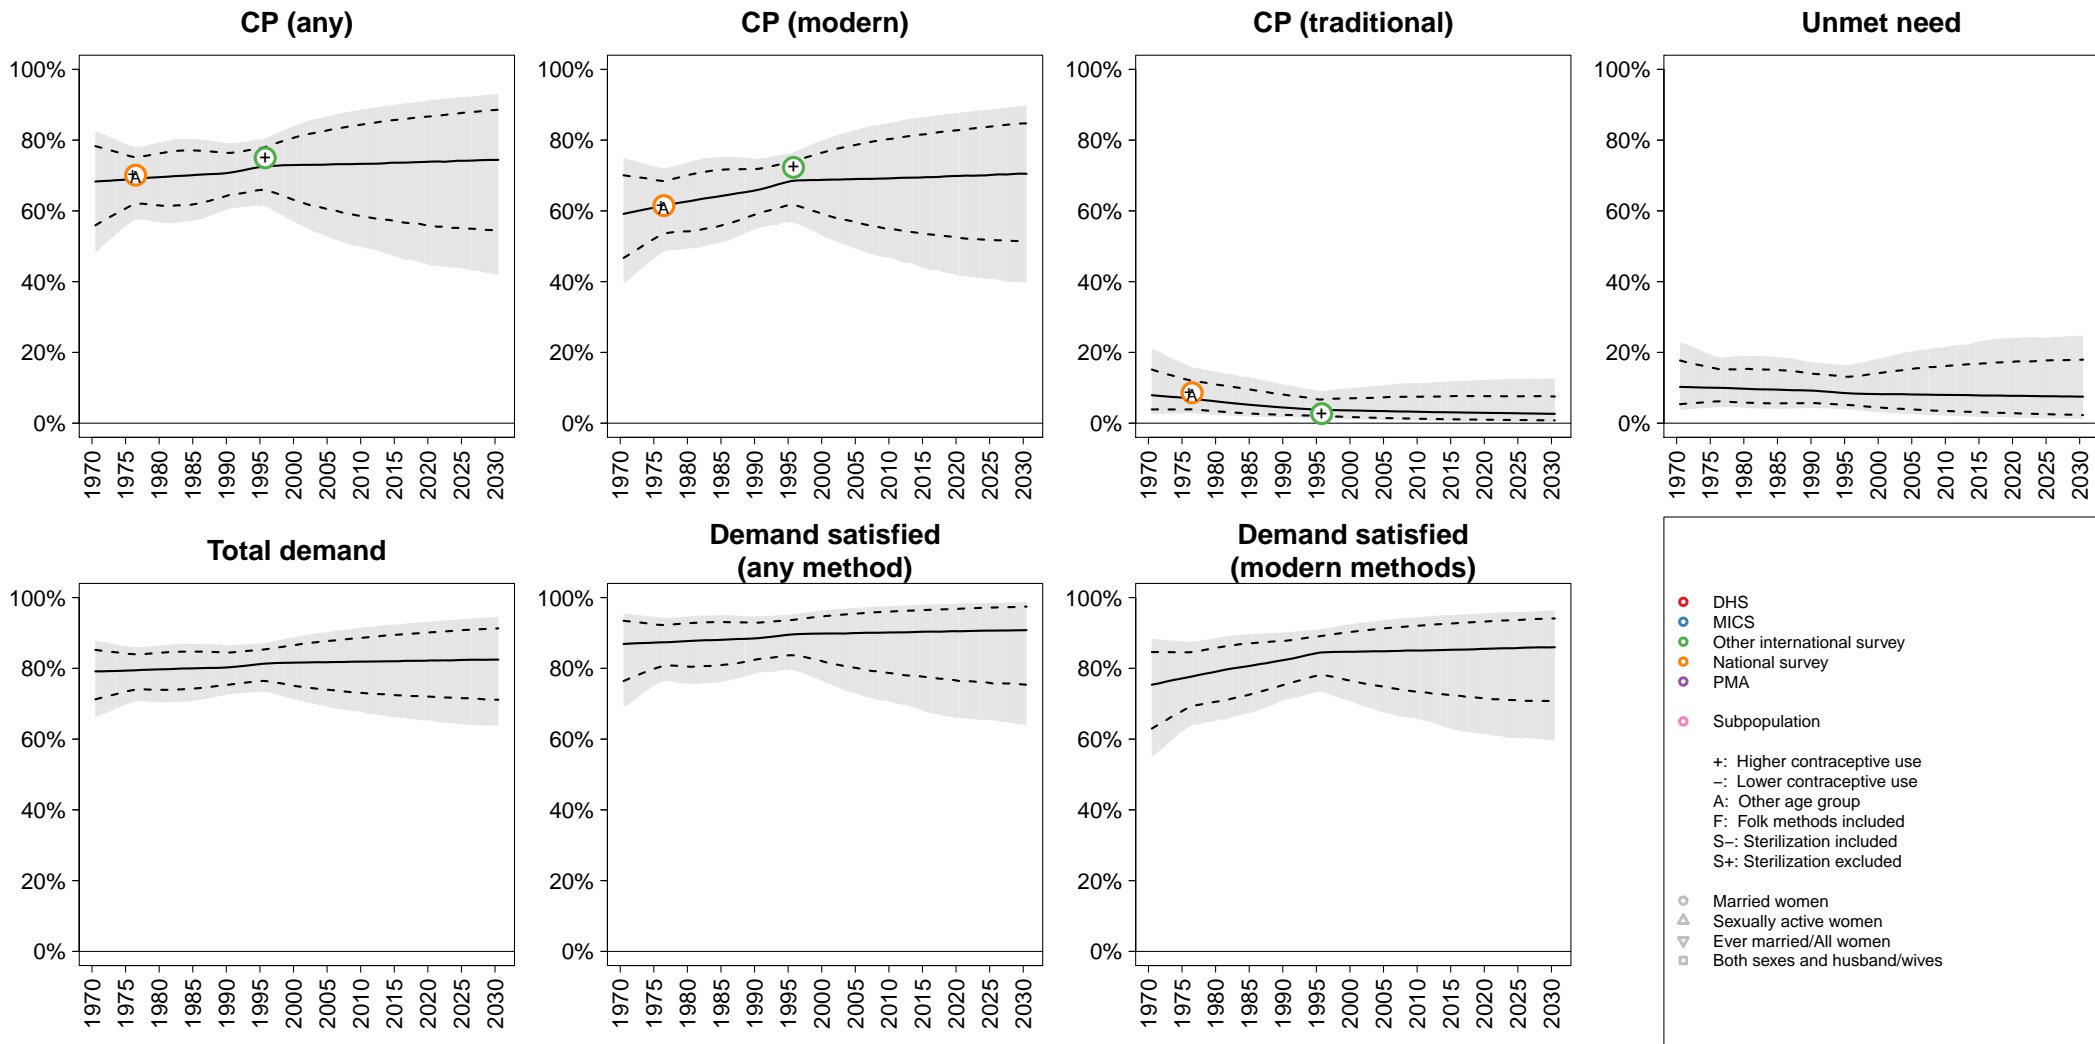

Nicaragua (Central America) --- Married / In-Union

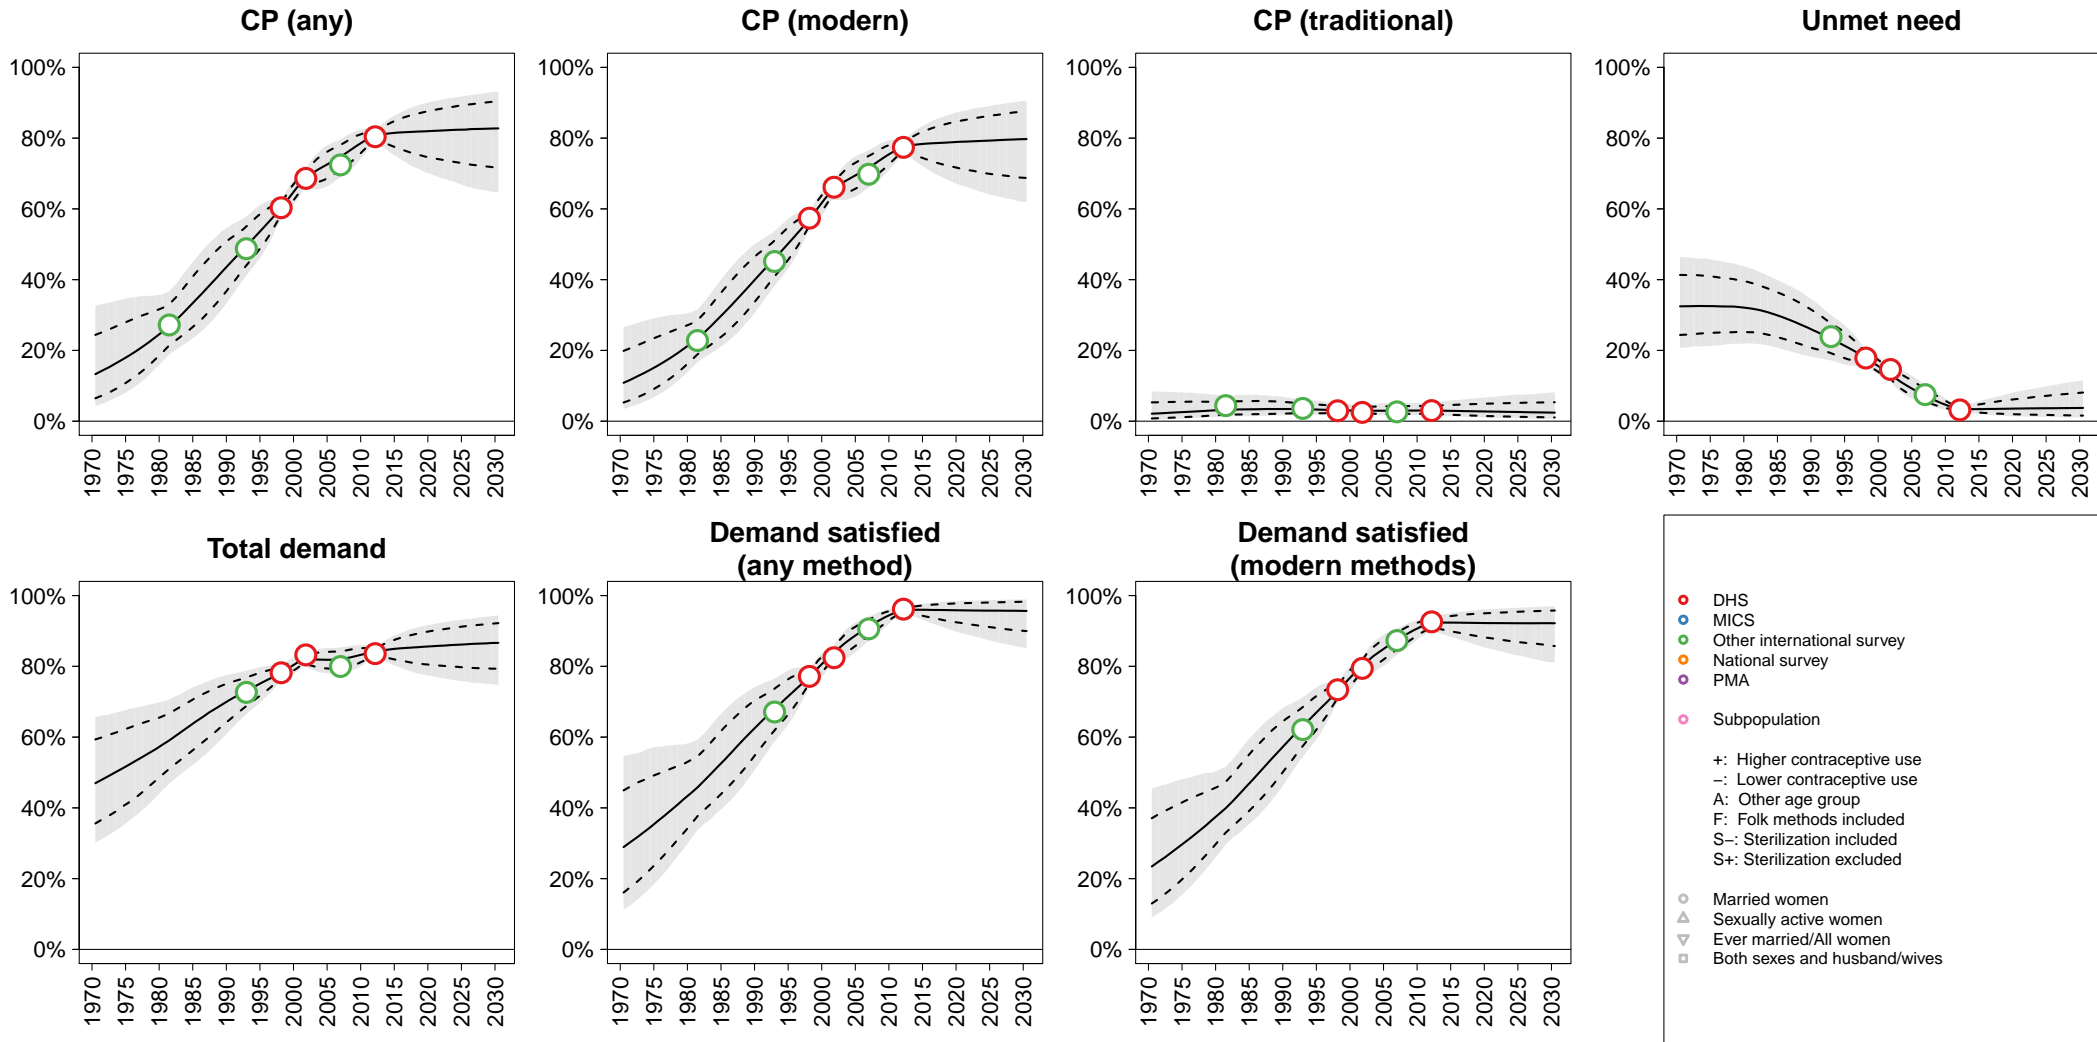

Niger (Western Africa) --- Married / In-Union

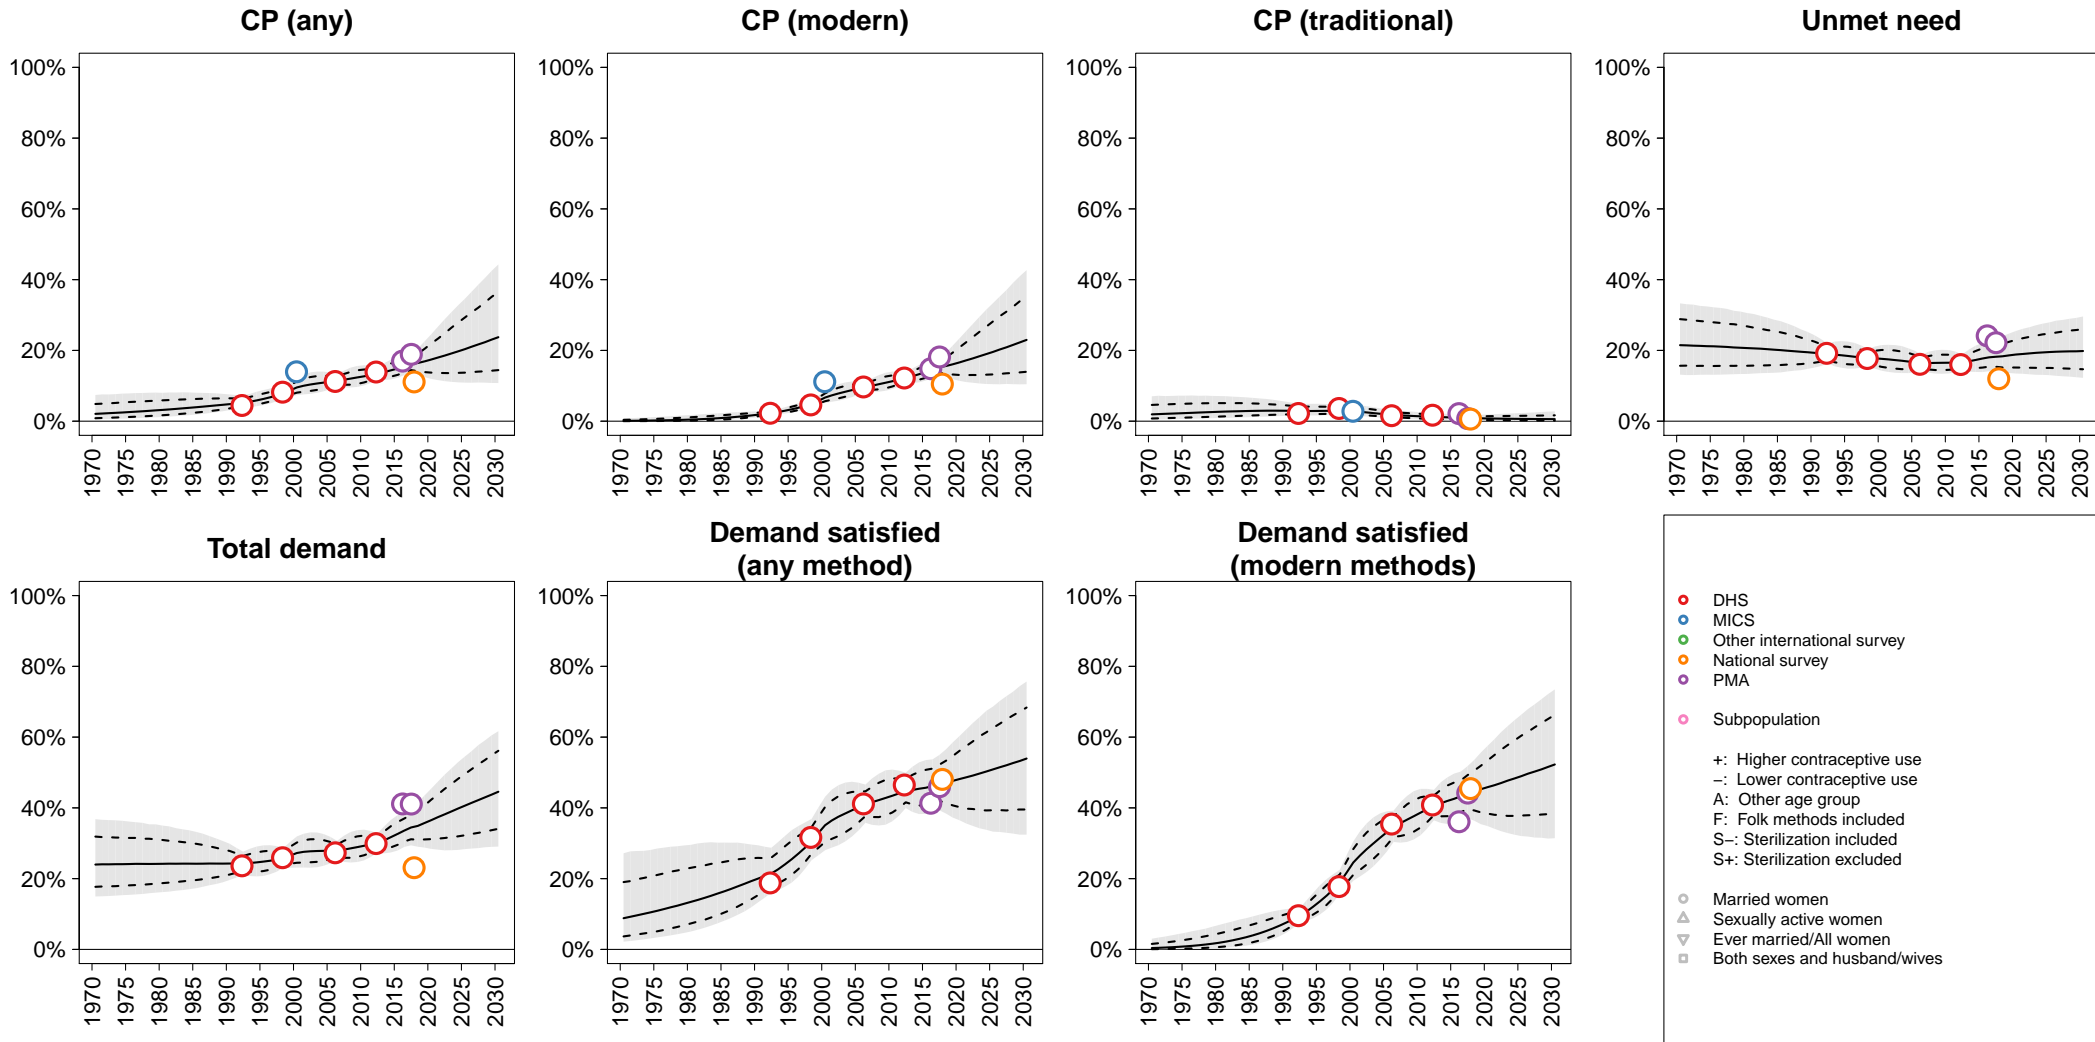

Nigeria (Western Africa) --- Married / In-Union

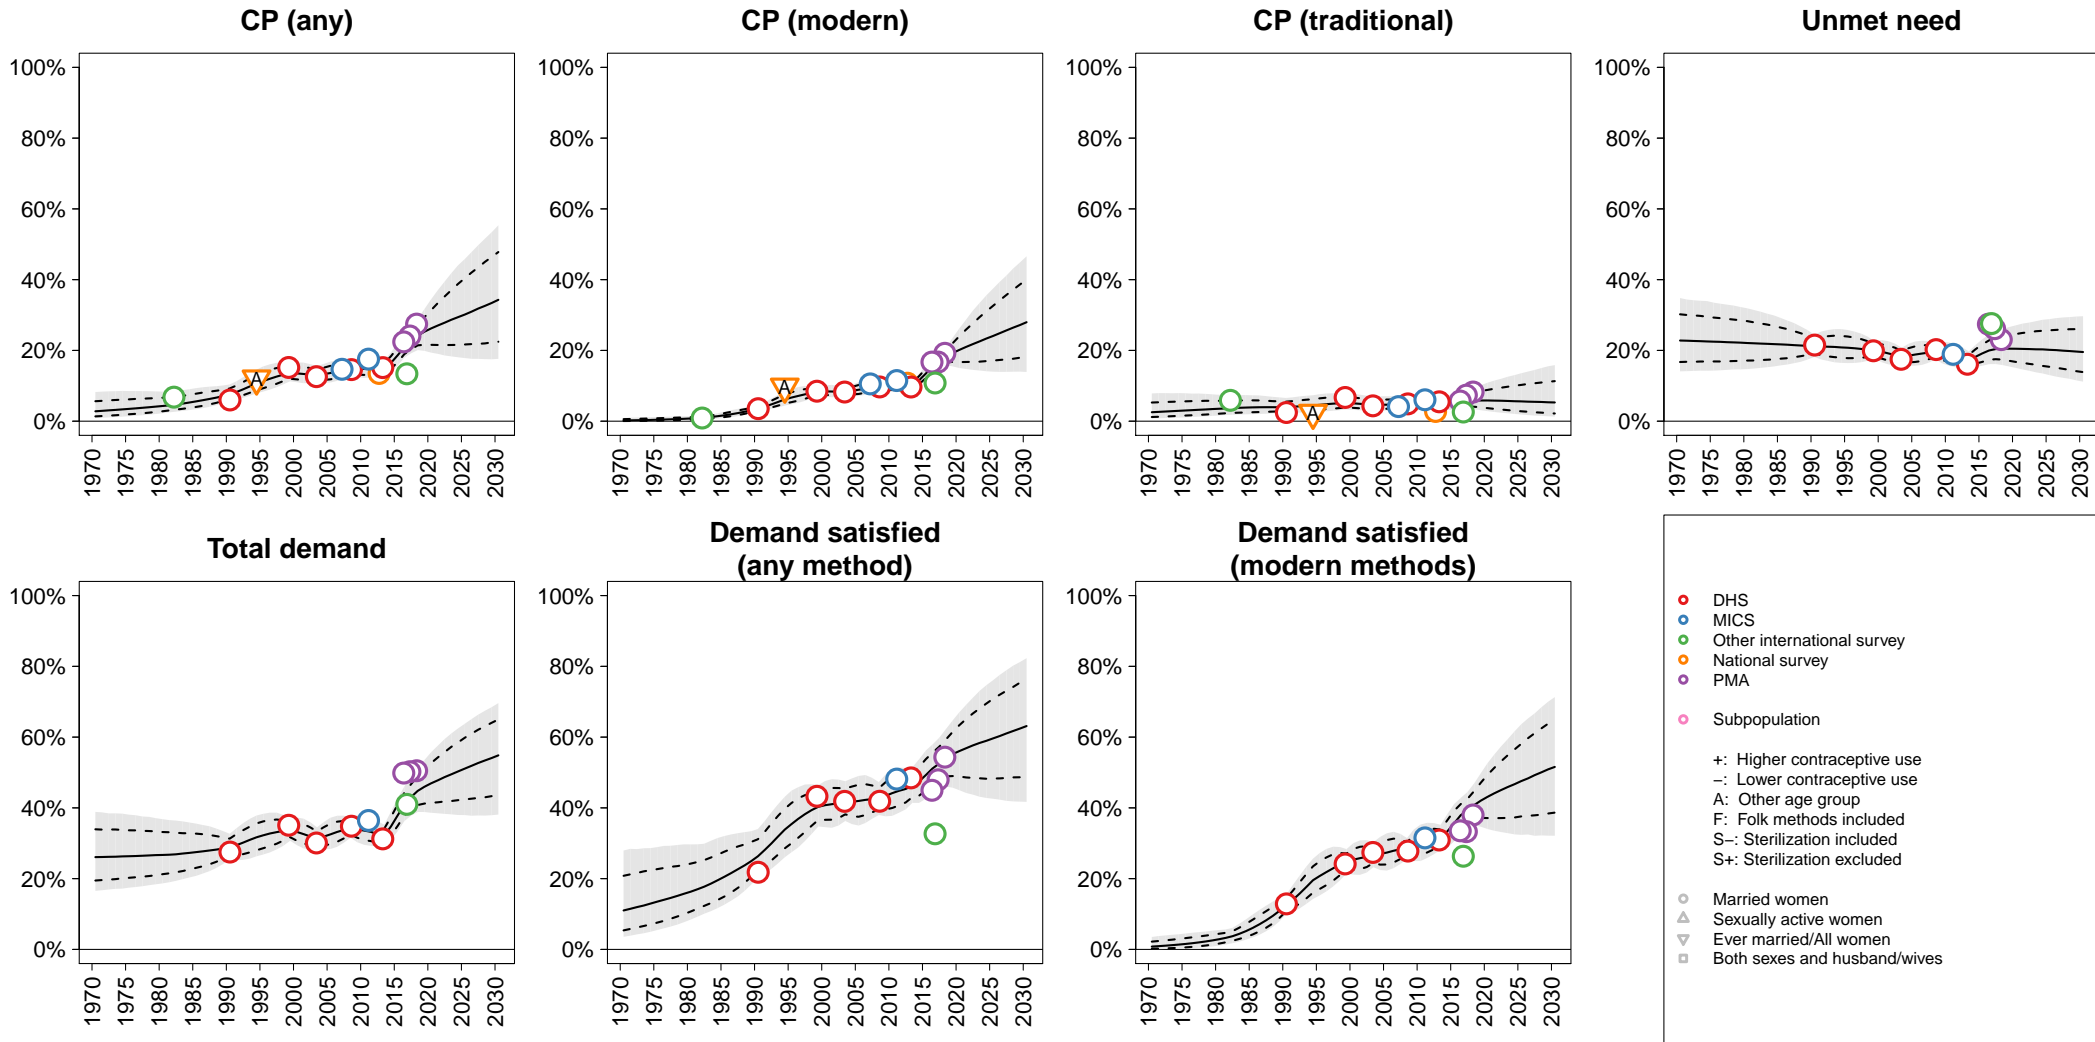

Norway (Northern Europe) --- Married / In-Union

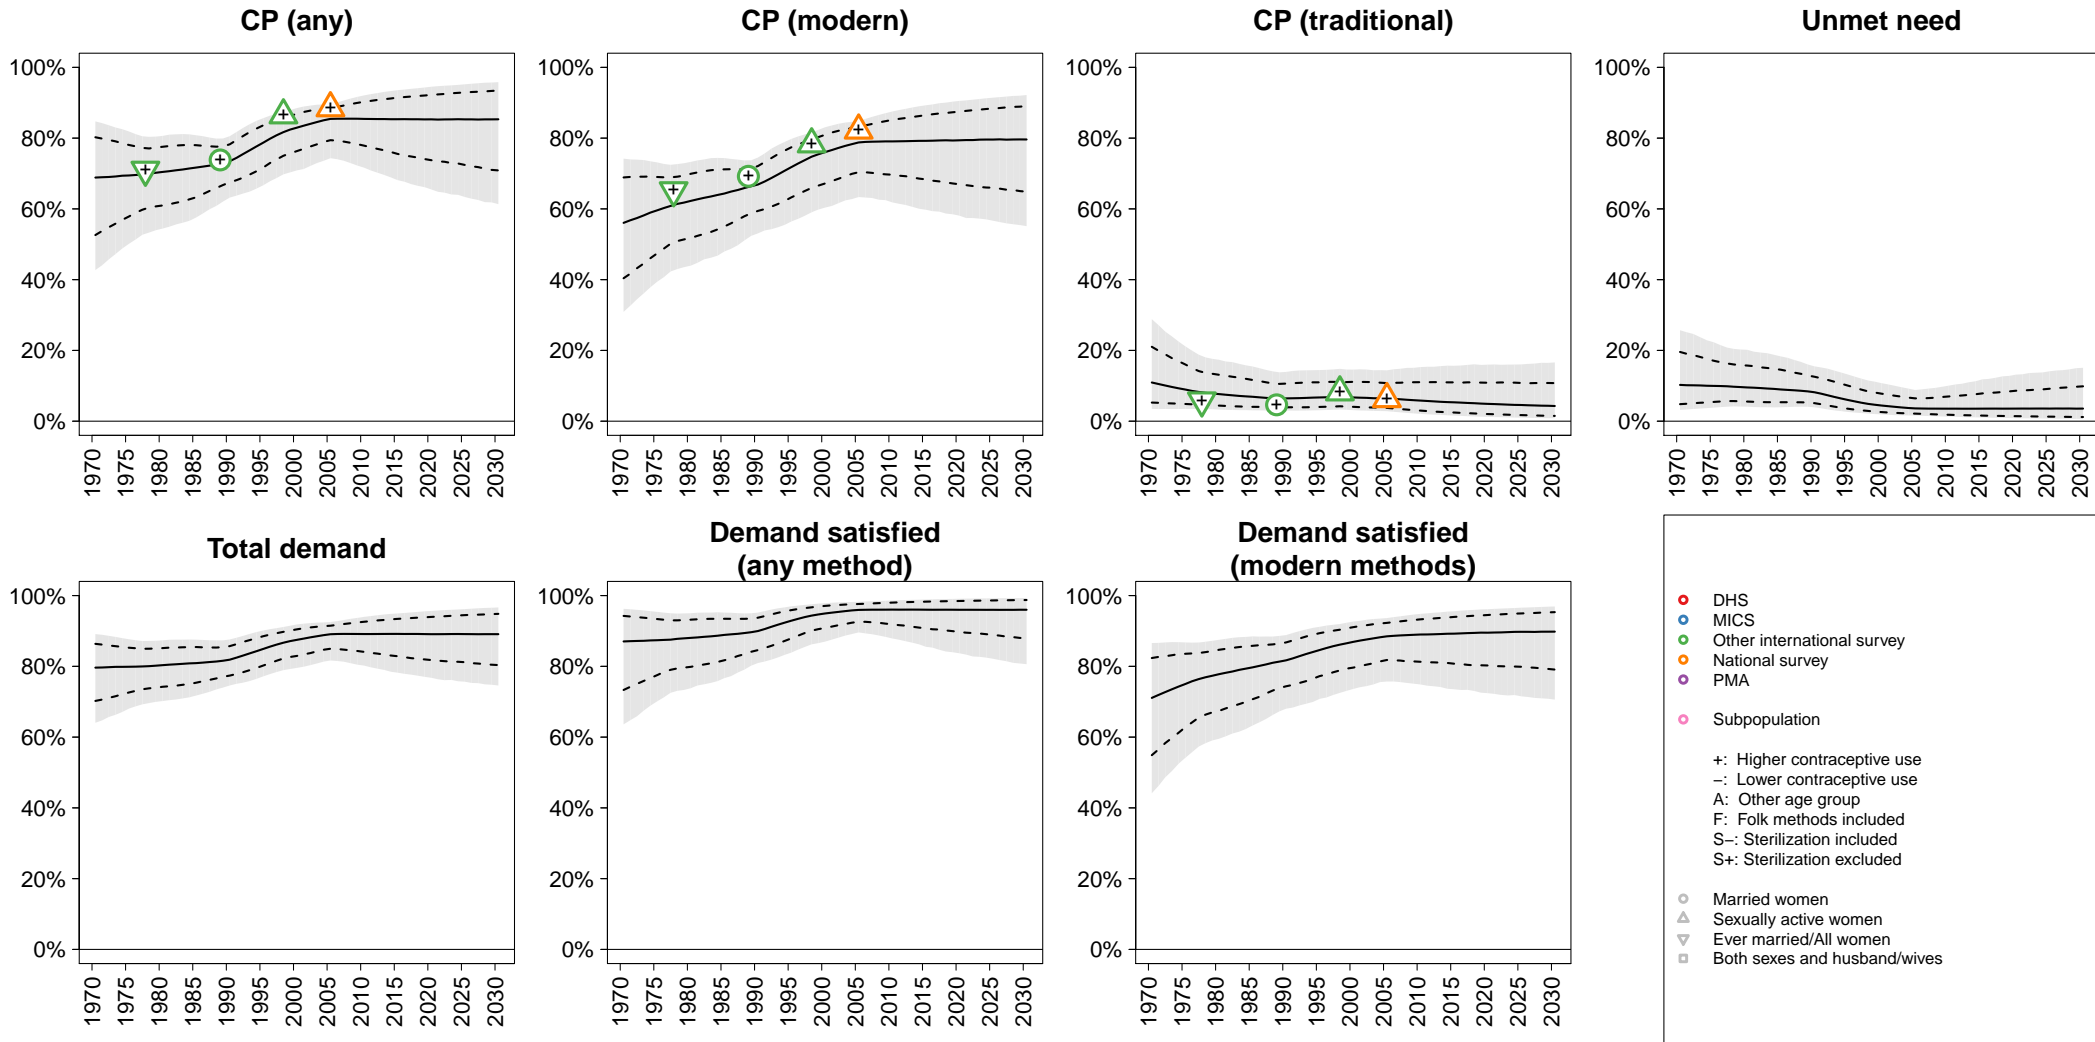



### Oman (Western Asia) --- Married / In-Union

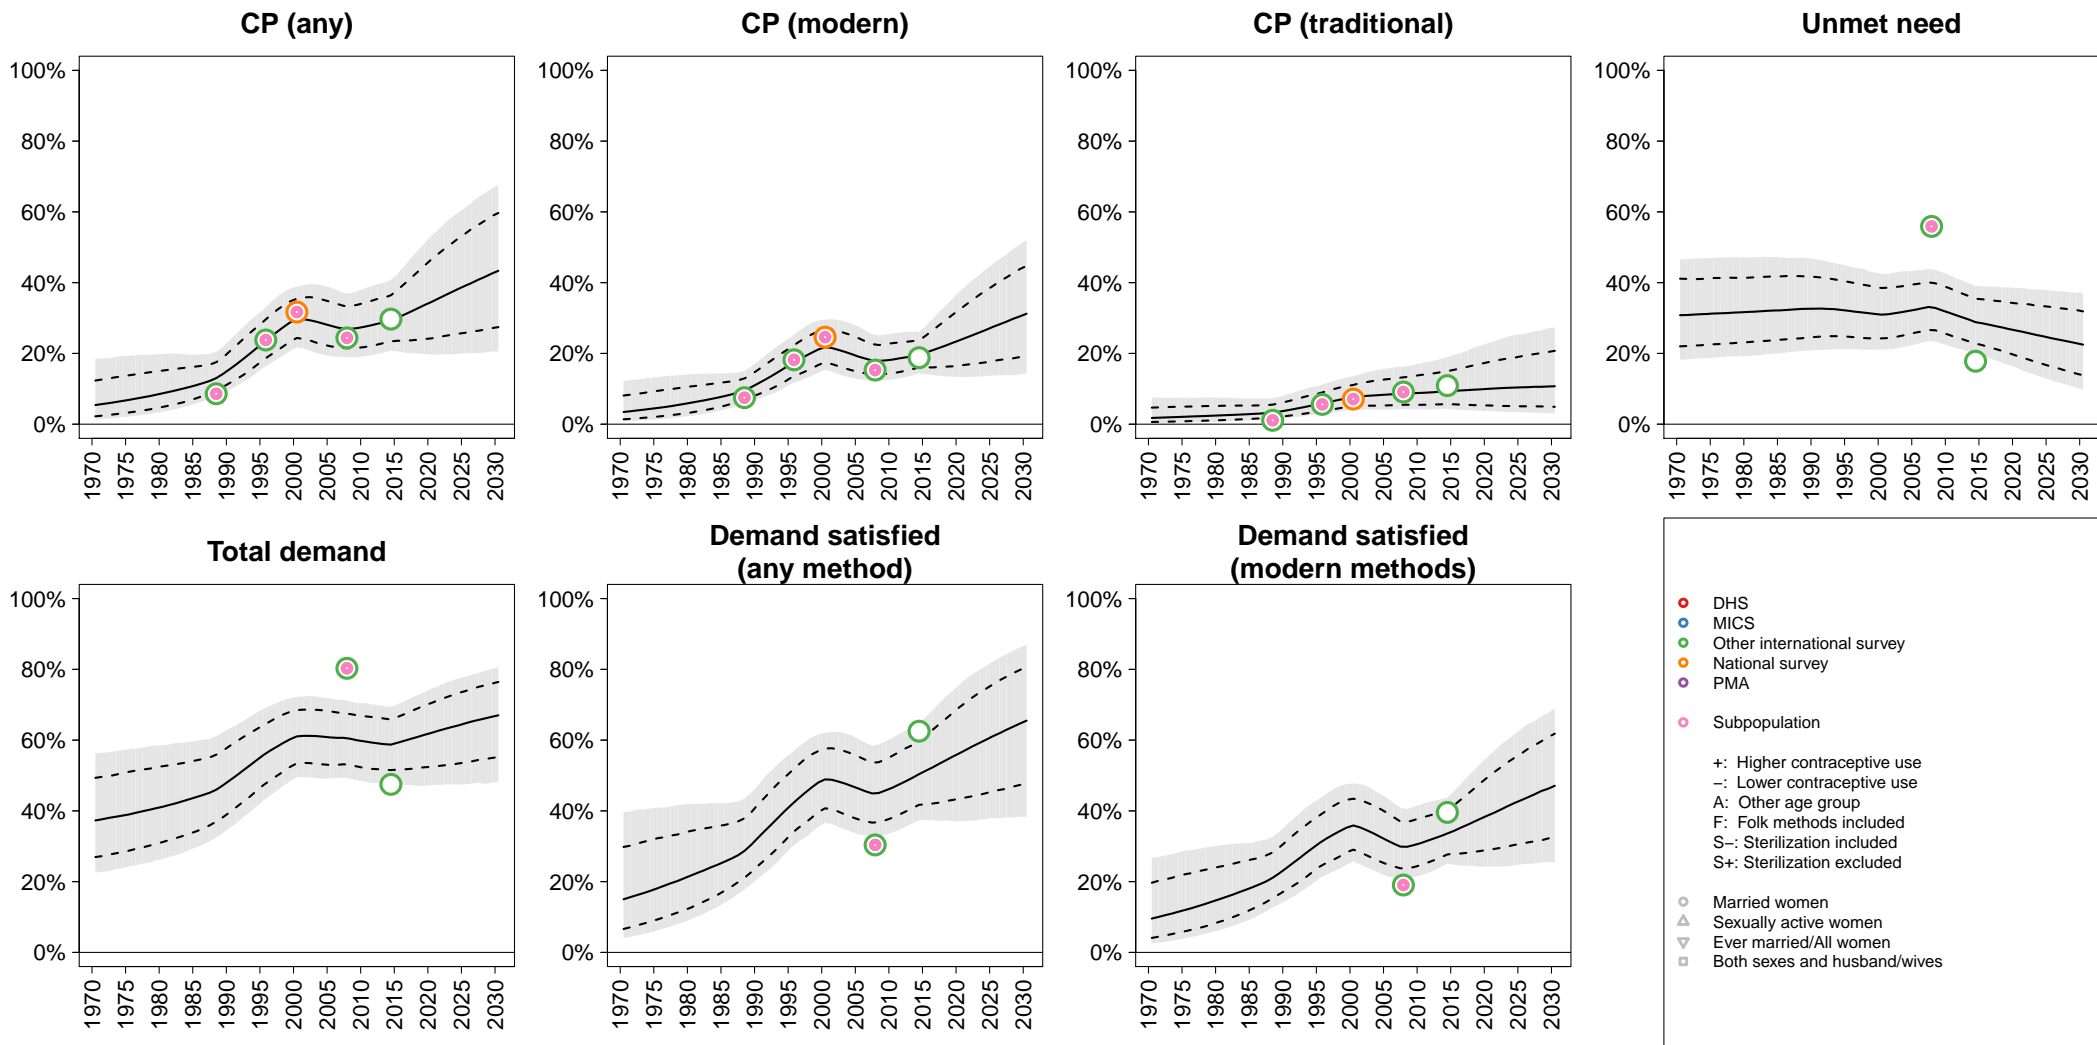

Pakistan (Southern Asia) --- Married / In-Union

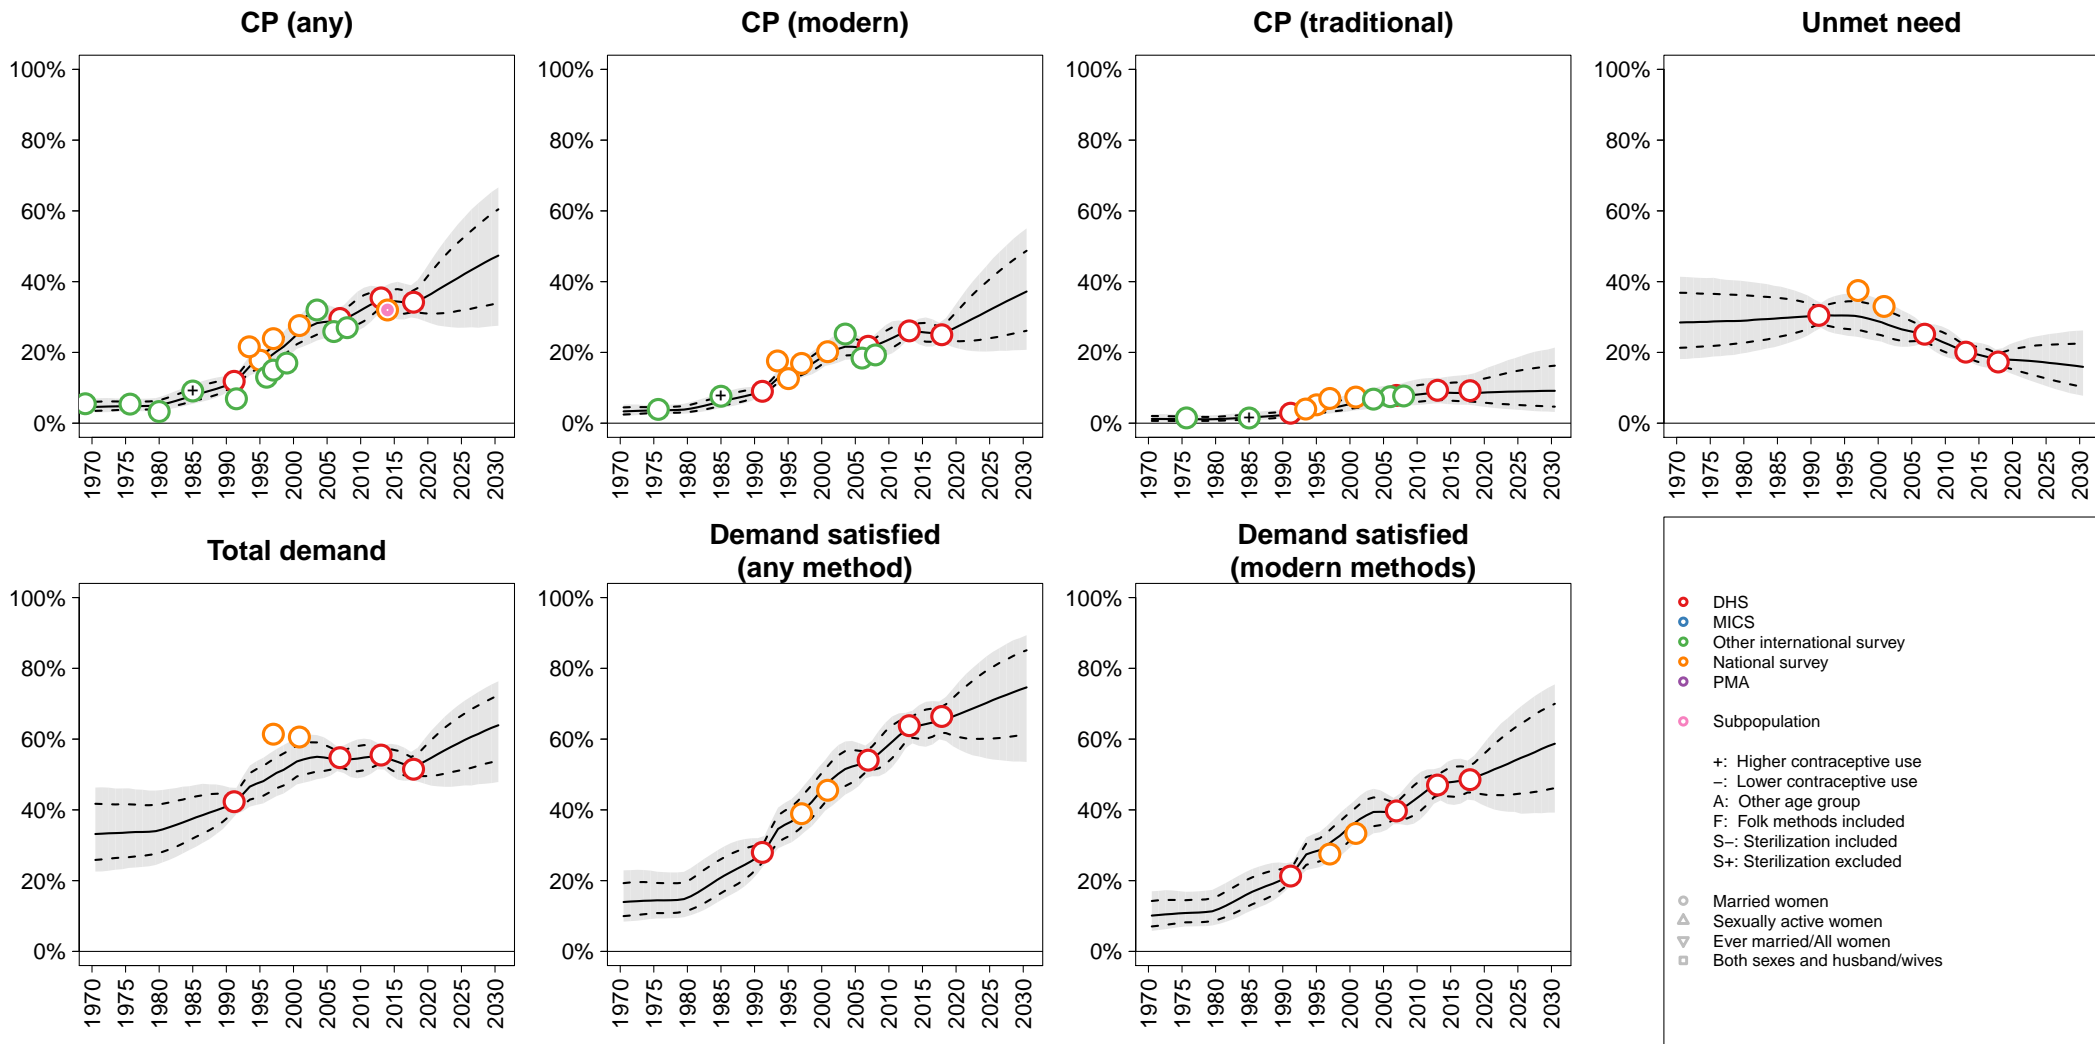

Panama (Central America) --- Married / In-Union

CP (any)

CP (modern)

CP (traditional)

Unmet need

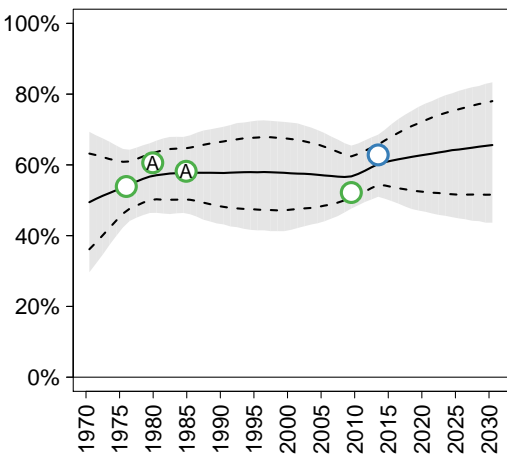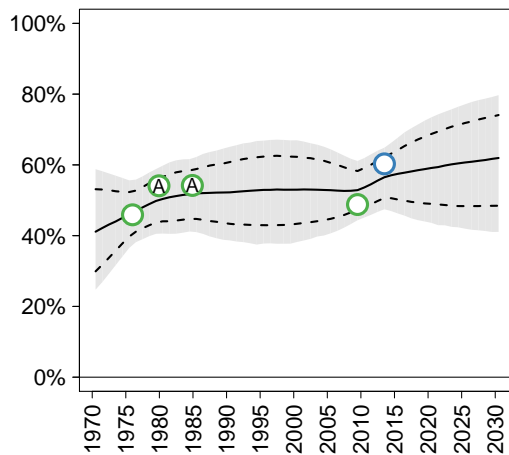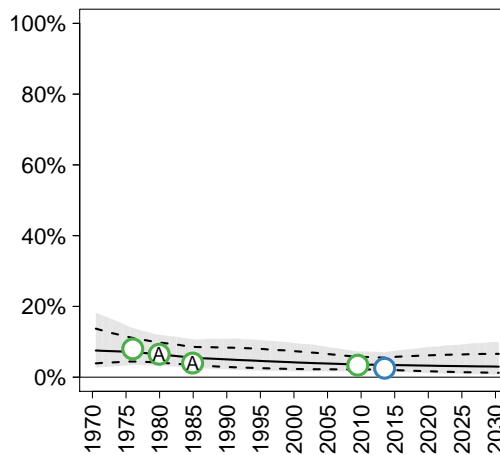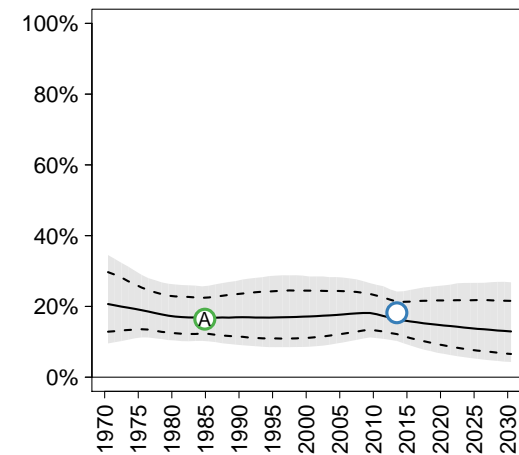

Total demand

Demand satisfied (any method)

Demand satisfied (modern methods)

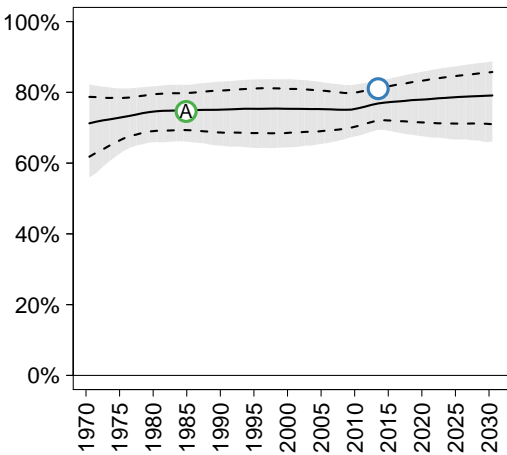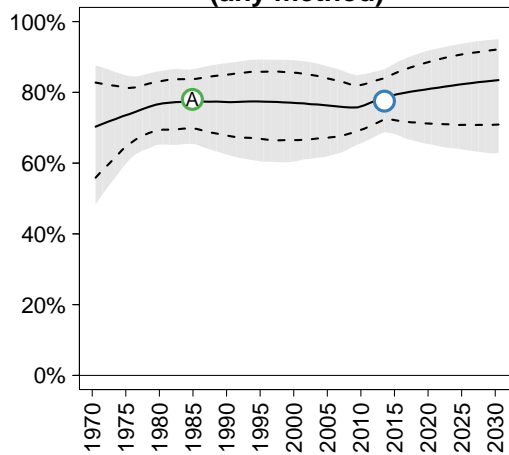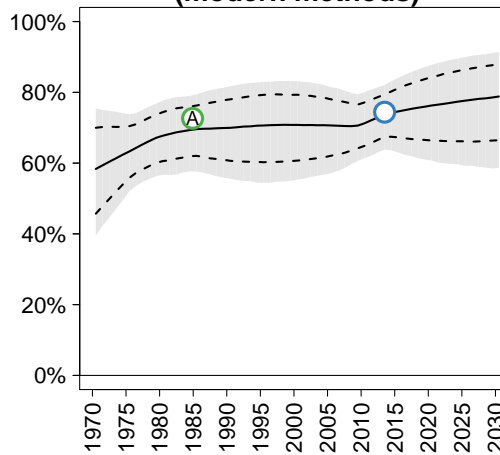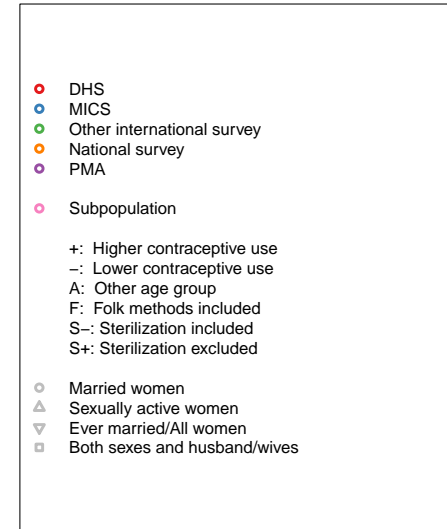

Papua New Guinea (Melanesia) --- Married / In-Union

CP (any)

CP (modern)

CP (traditional)

Unmet need

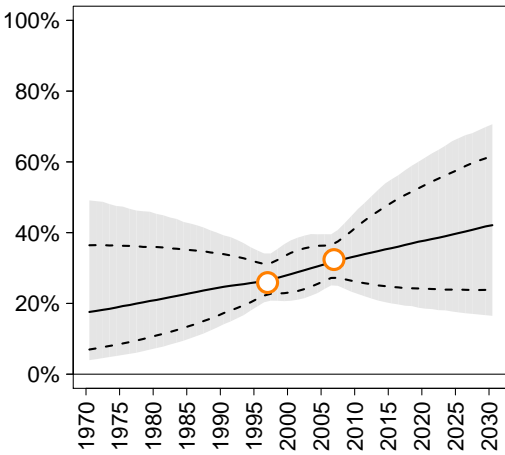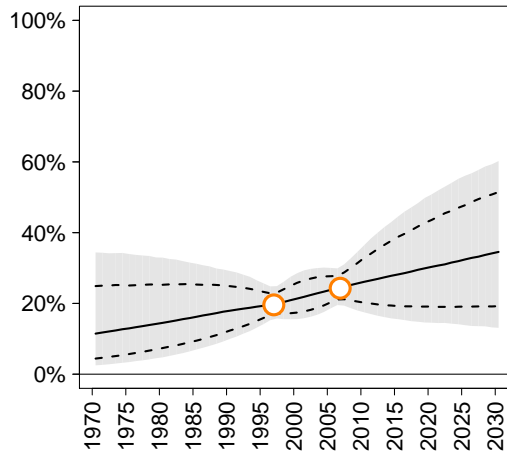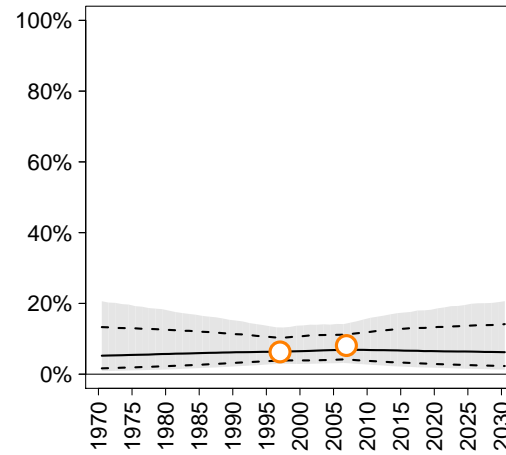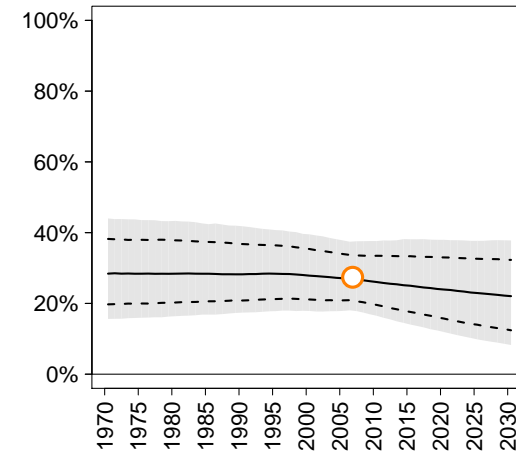

Total demand

Demand satisfied (any method)

Demand satisfied (modern methods)

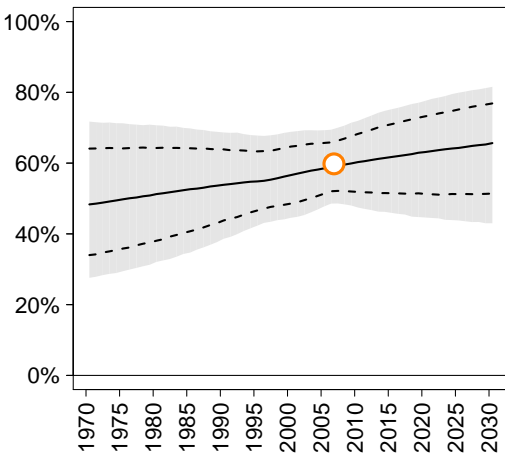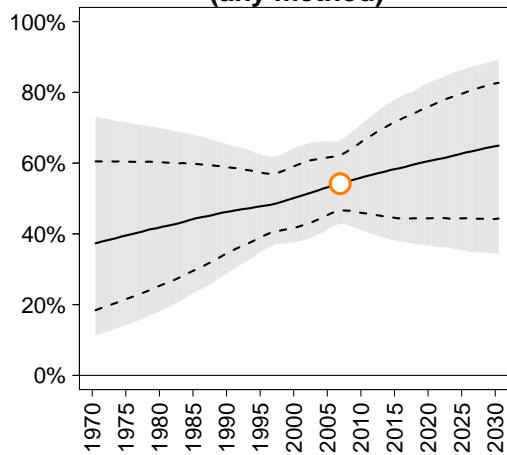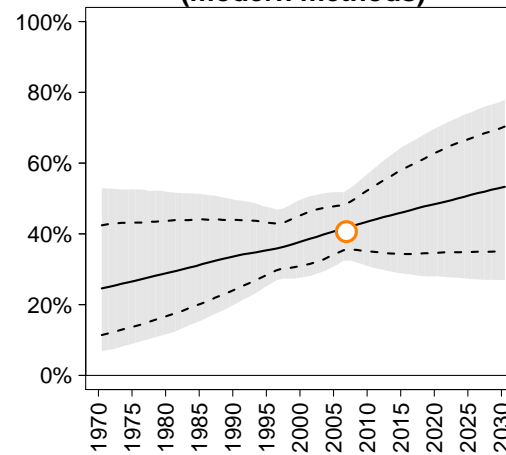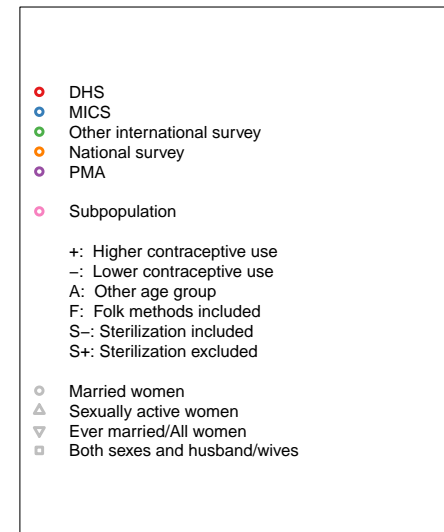

Paraguay (South America) --- Married / In-Union

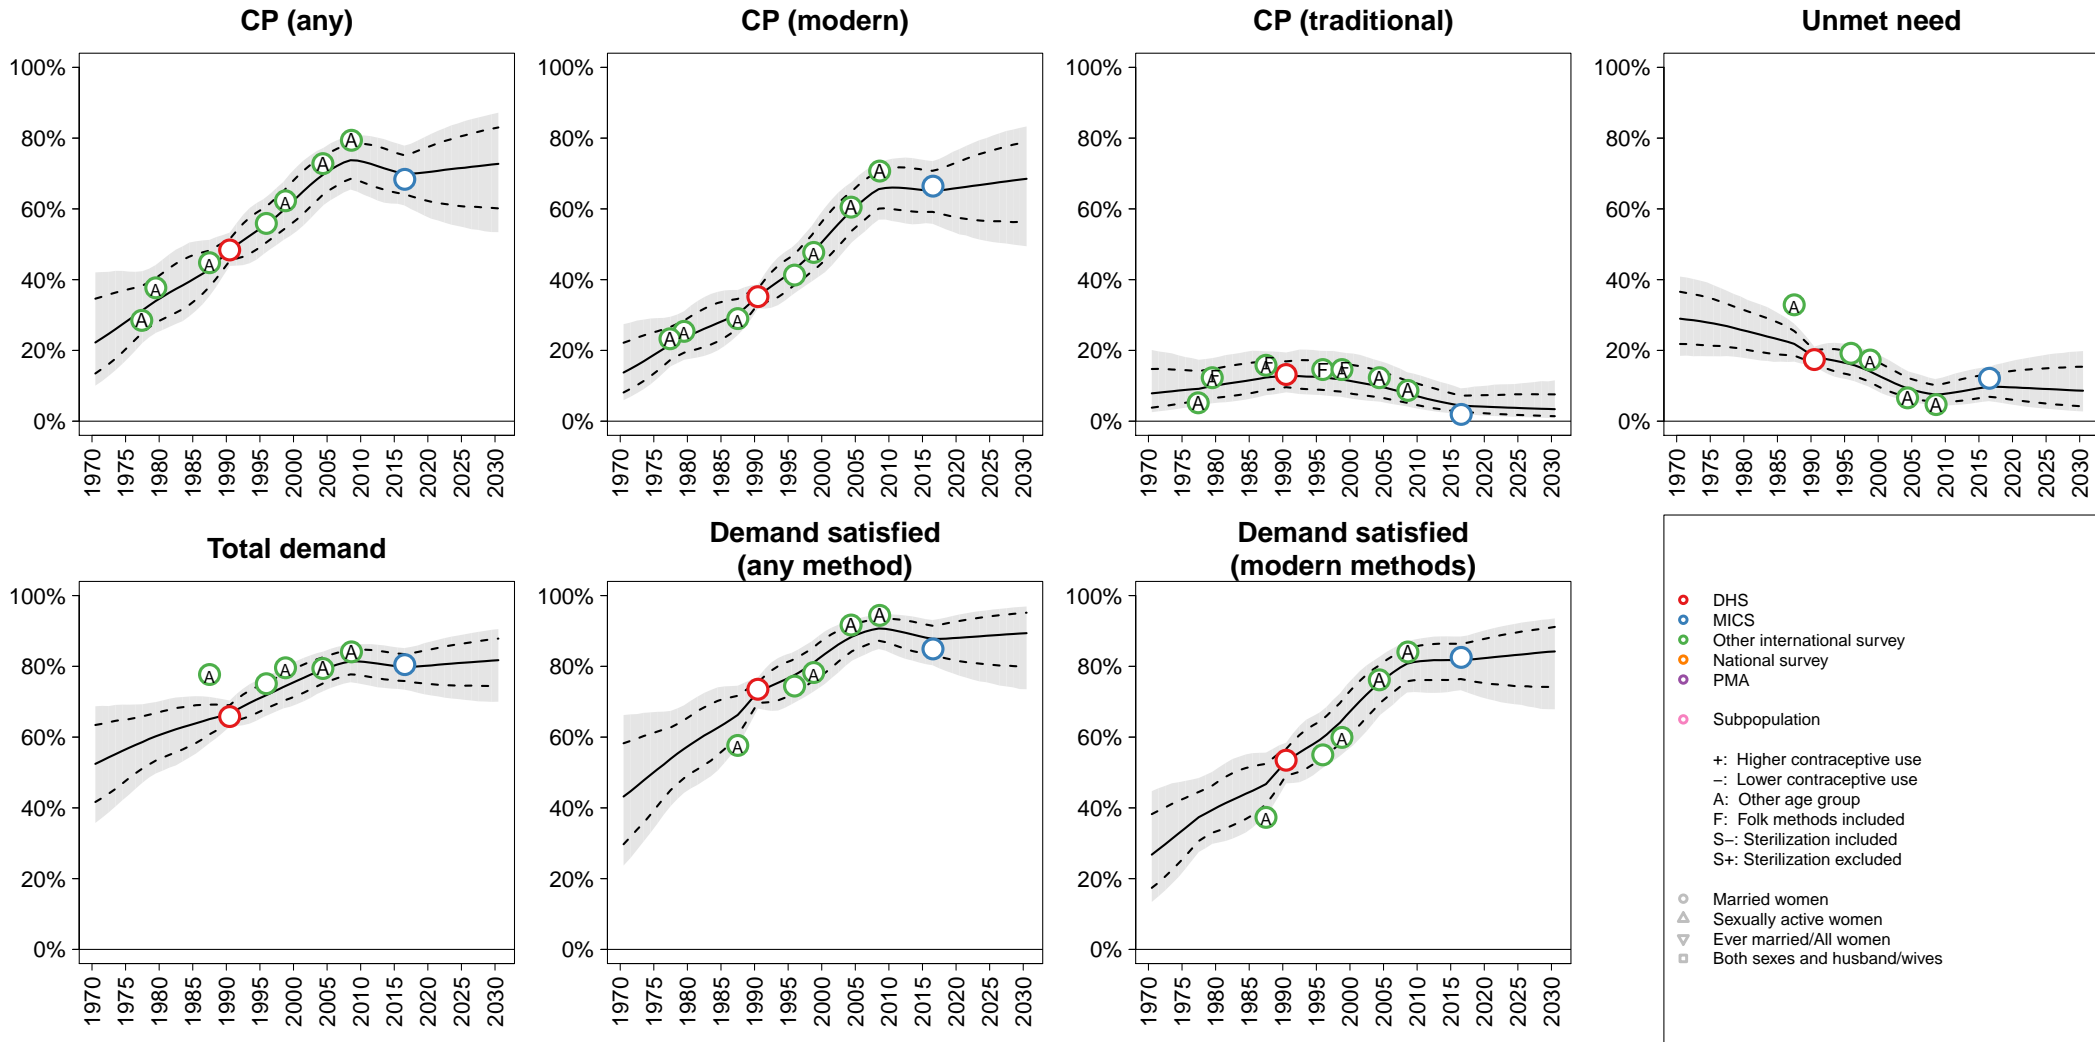

Peru (South America) --- Married / In-Union

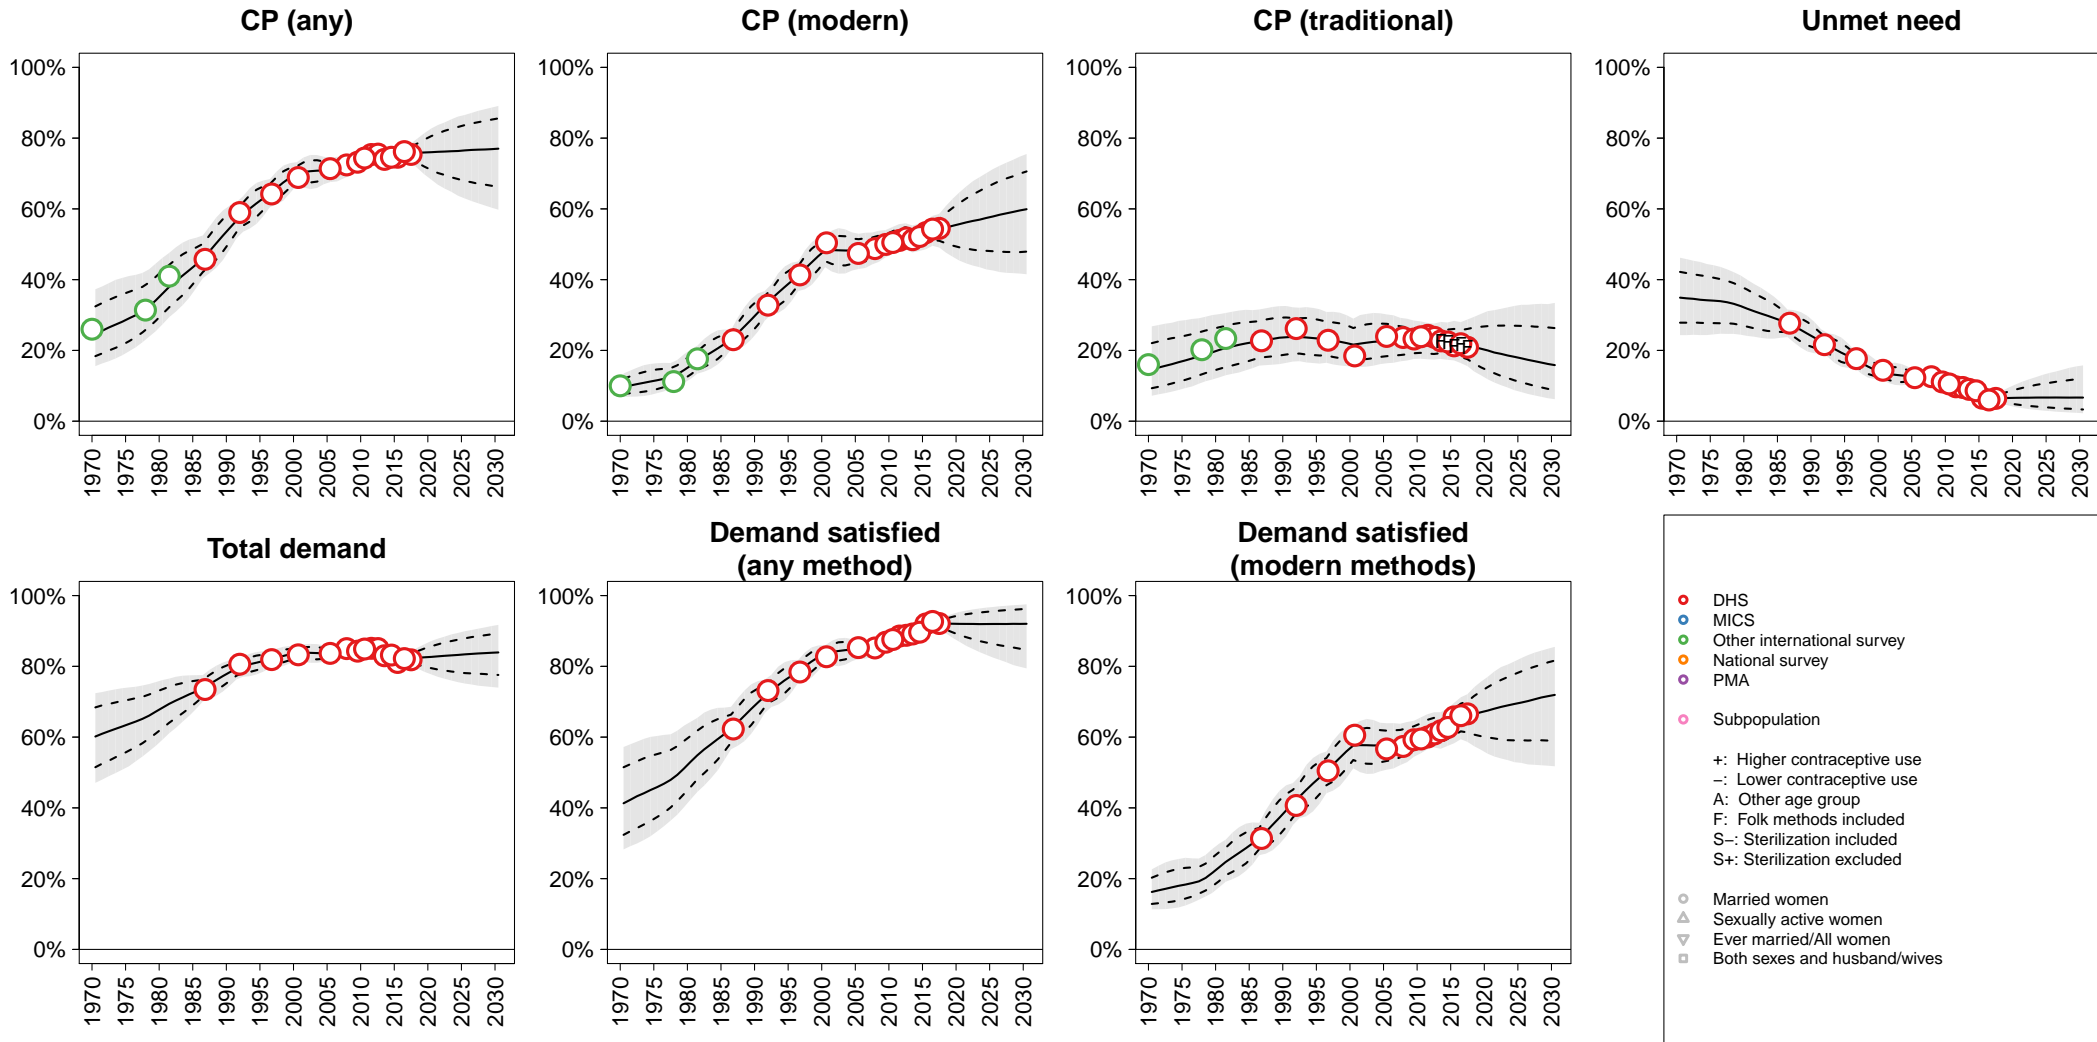

Philippines (South-eastern Asia) --- Married / In-Union

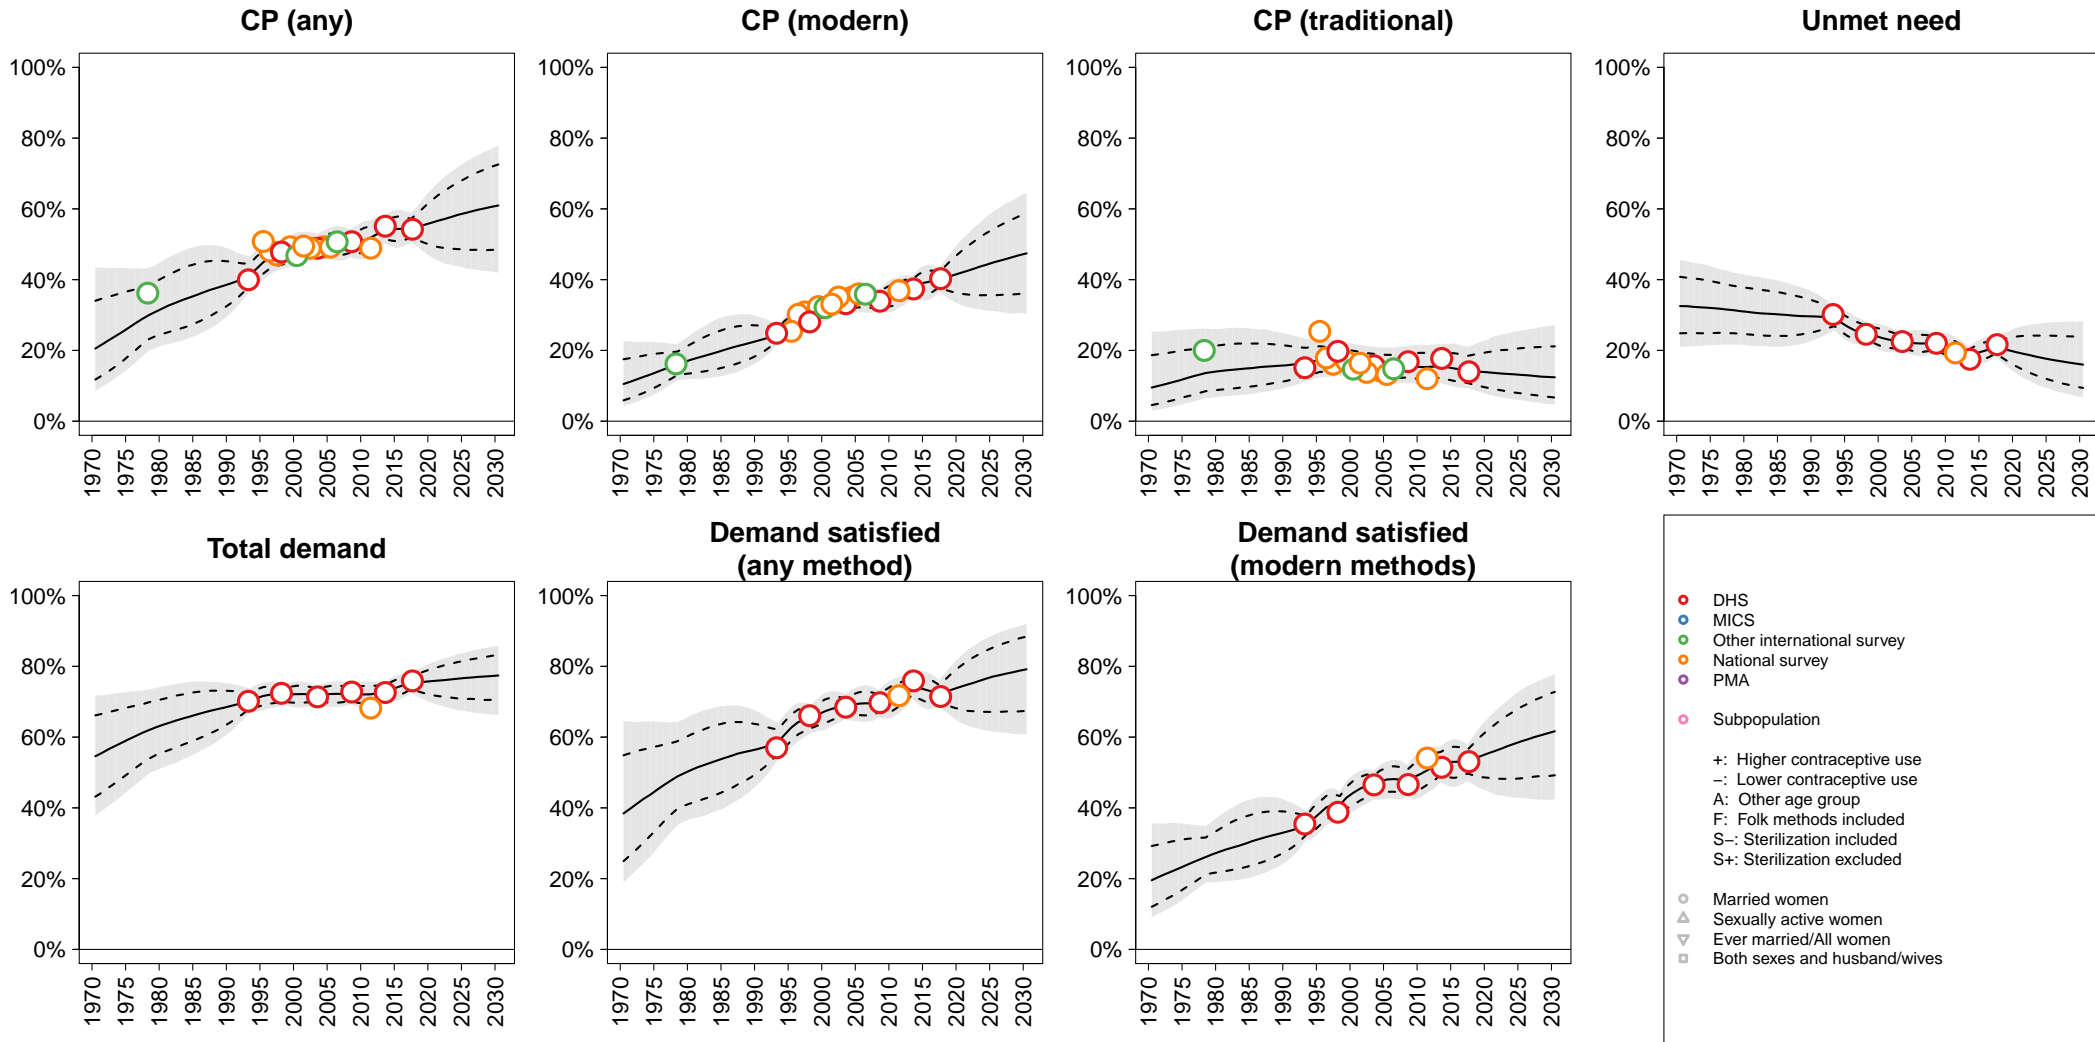

Poland (Eastern Europe) --- Married / In-Union

CP (any)

CP (modern)

CP (traditional)

Unmet need

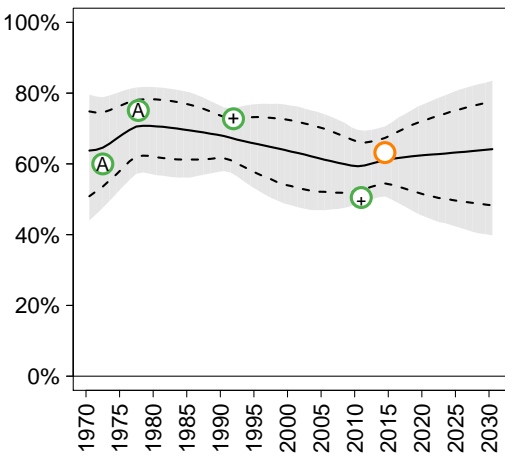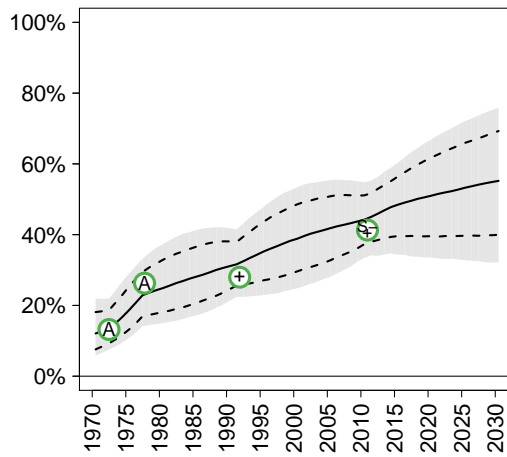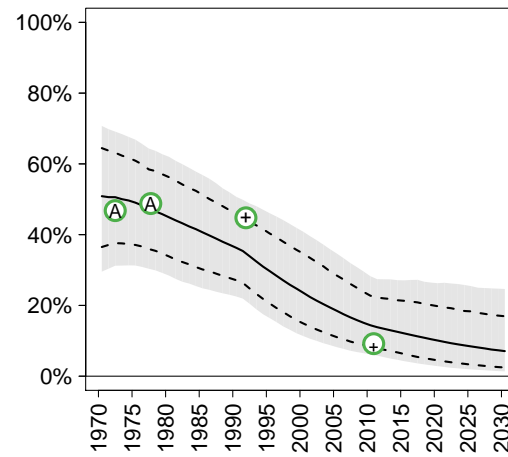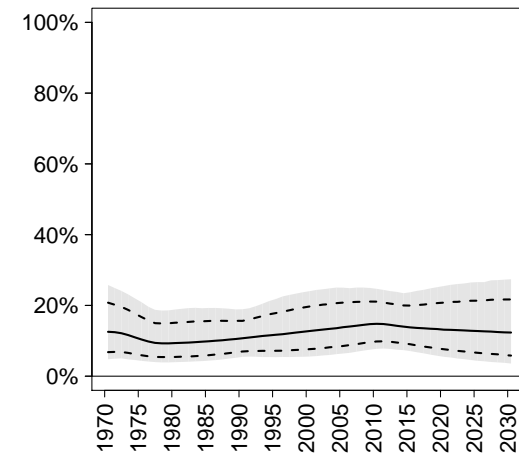

Total demand

Demand satisfied (any method)

Demand satisfied (modern methods)

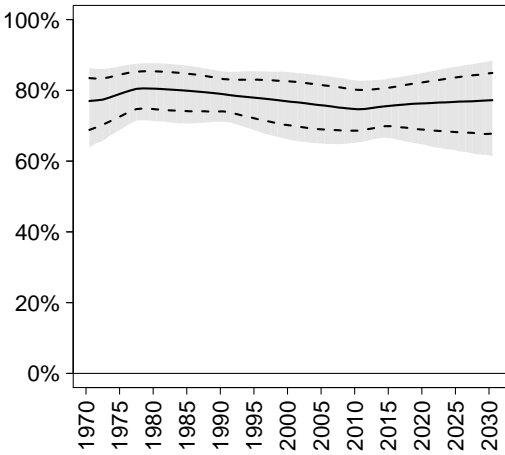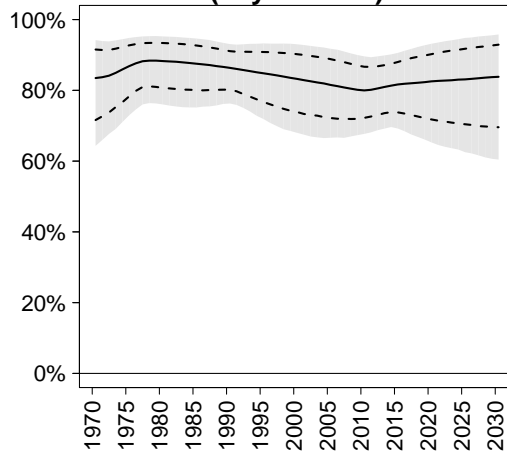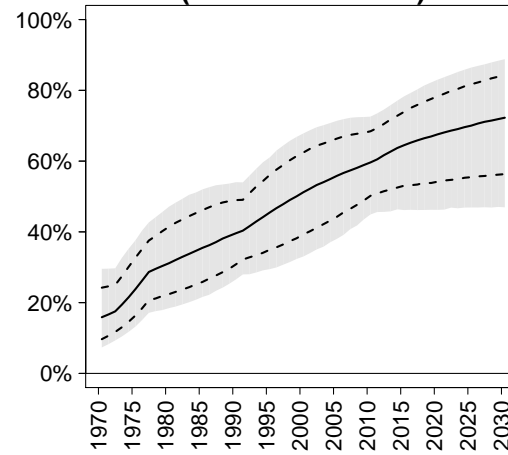



Portugal (Southern Europe) --- Married / In-Union

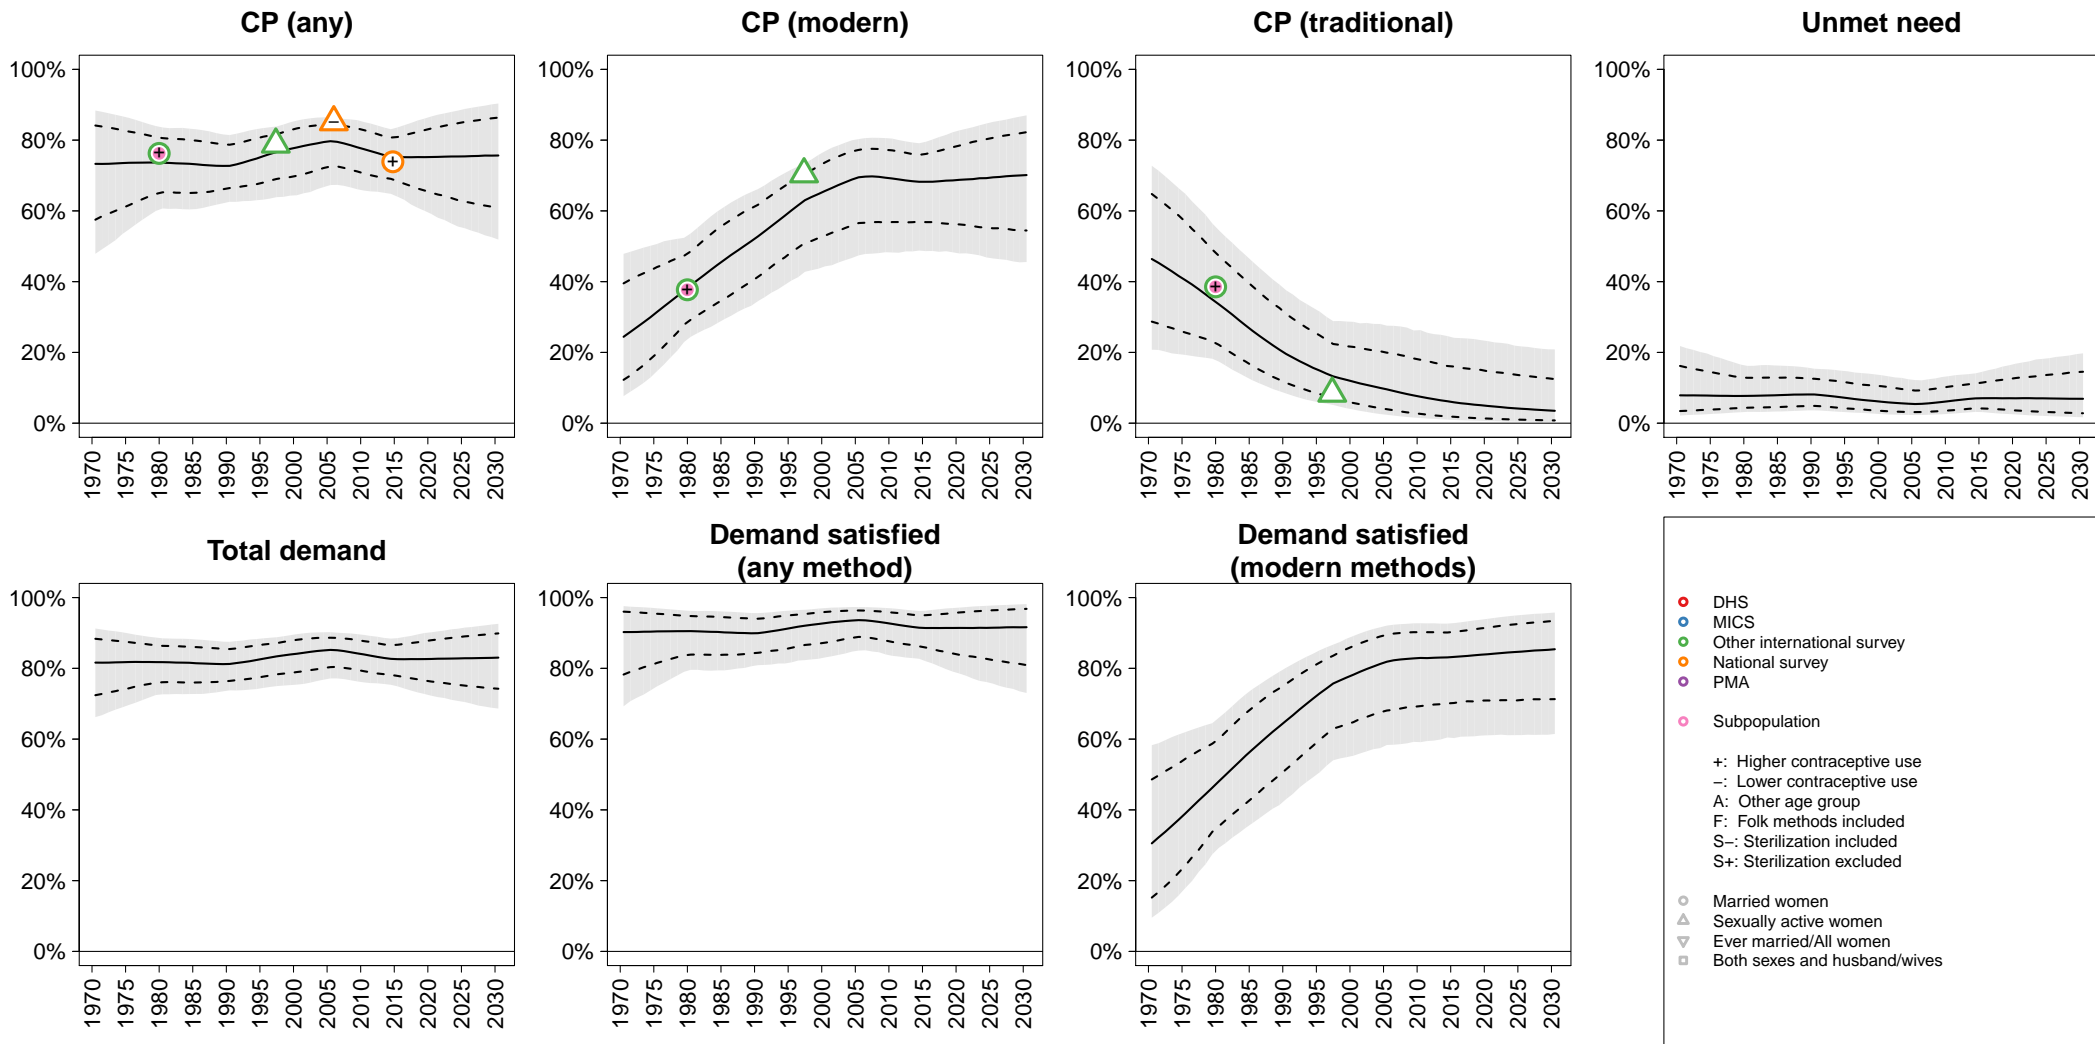

Puerto Rico (Caribbean) --- Married / In-Union

CP (any)

CP (modern)

CP (traditional)

Unmet need

Total demand

Demand satisfied (any method)

Demand satisfied (modern methods)

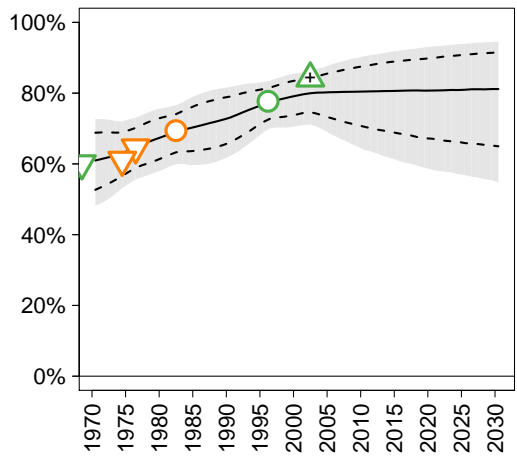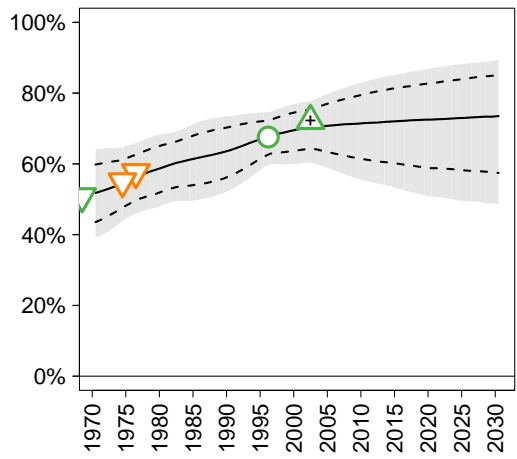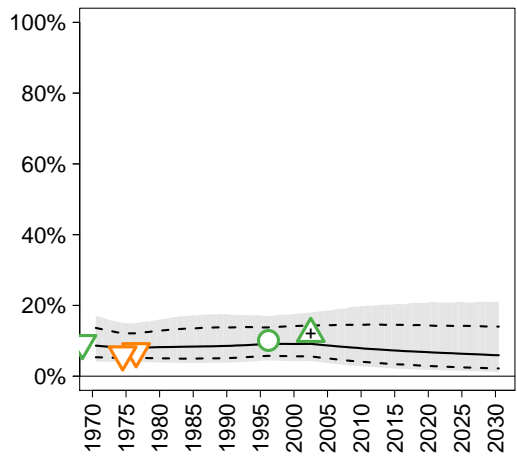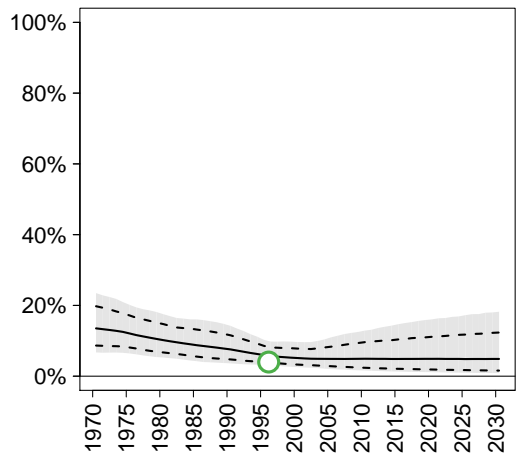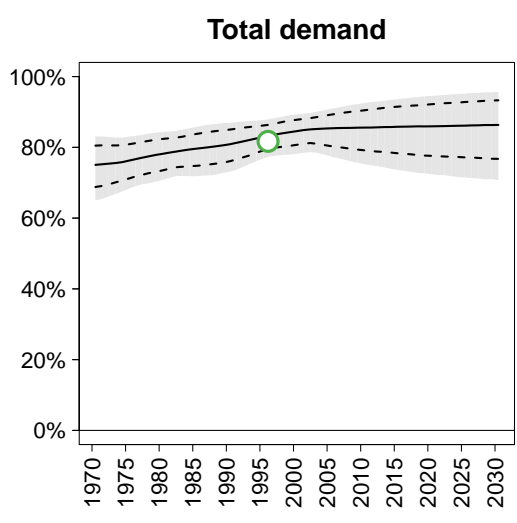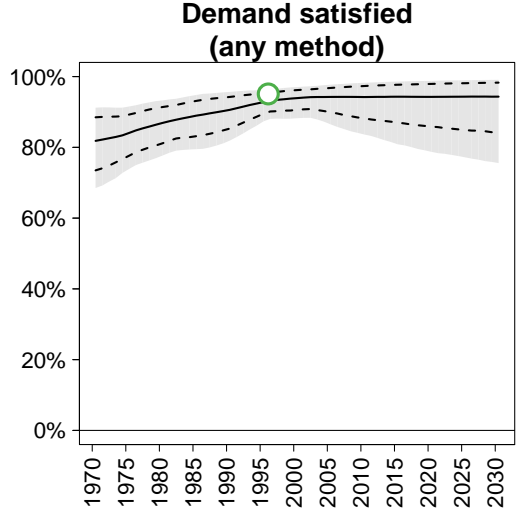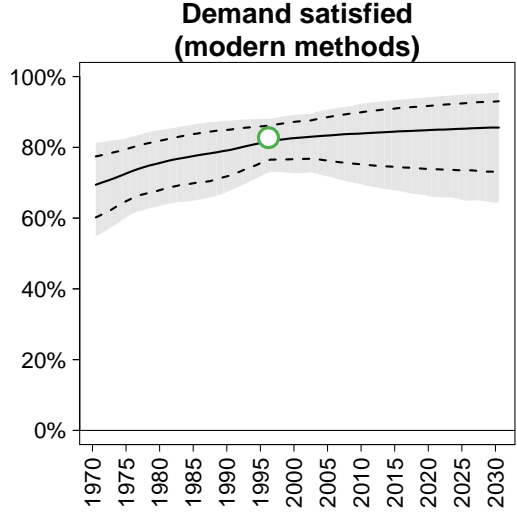

Qatar (Western Asia) --- Married / In-Union

CP (any)

CP (modern)

CP (traditional)

Unmet need

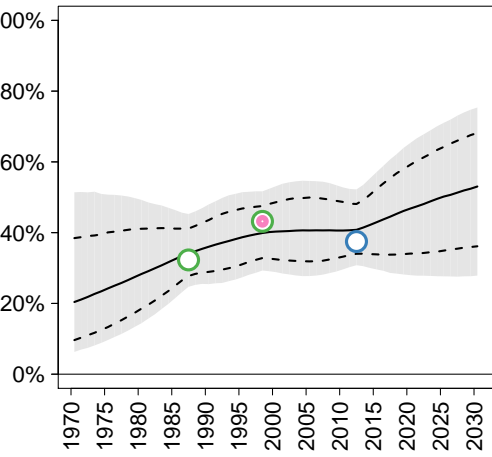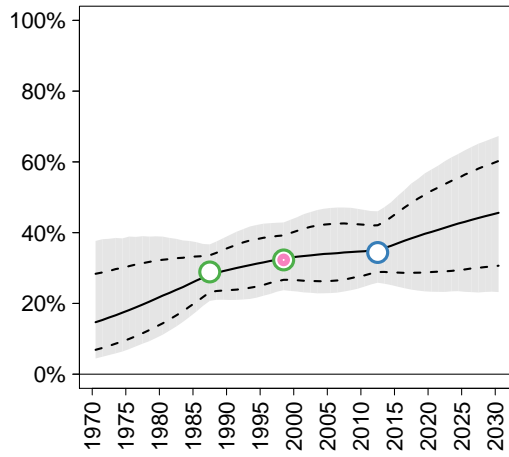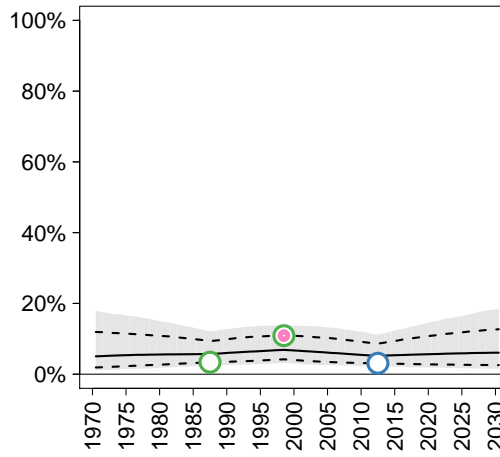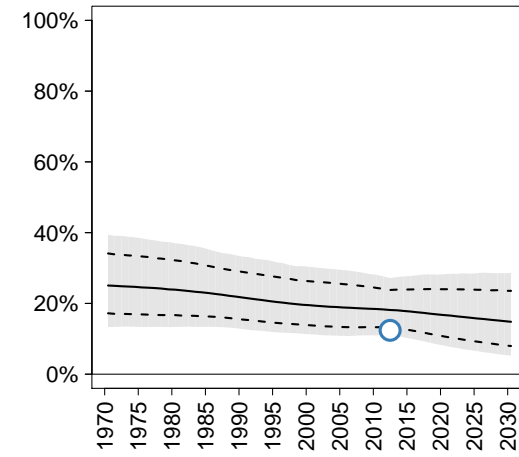

Total demand

Demand satisfied (any method)

Demand satisfied (modern methods)

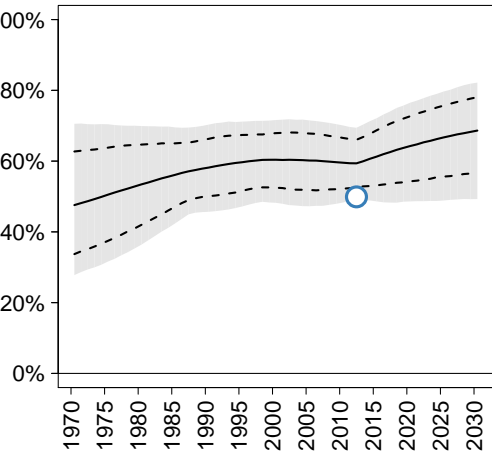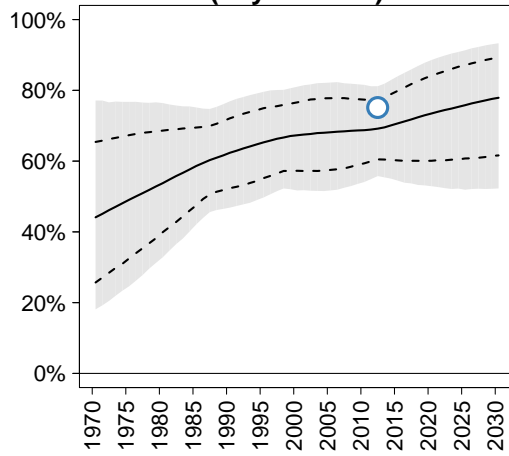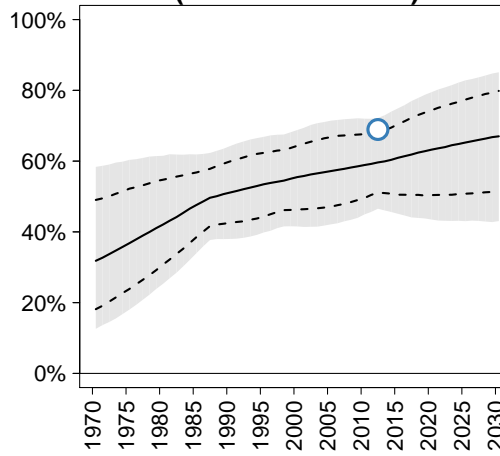

Republic of Korea (Eastern Asia) --- Married / In-Union

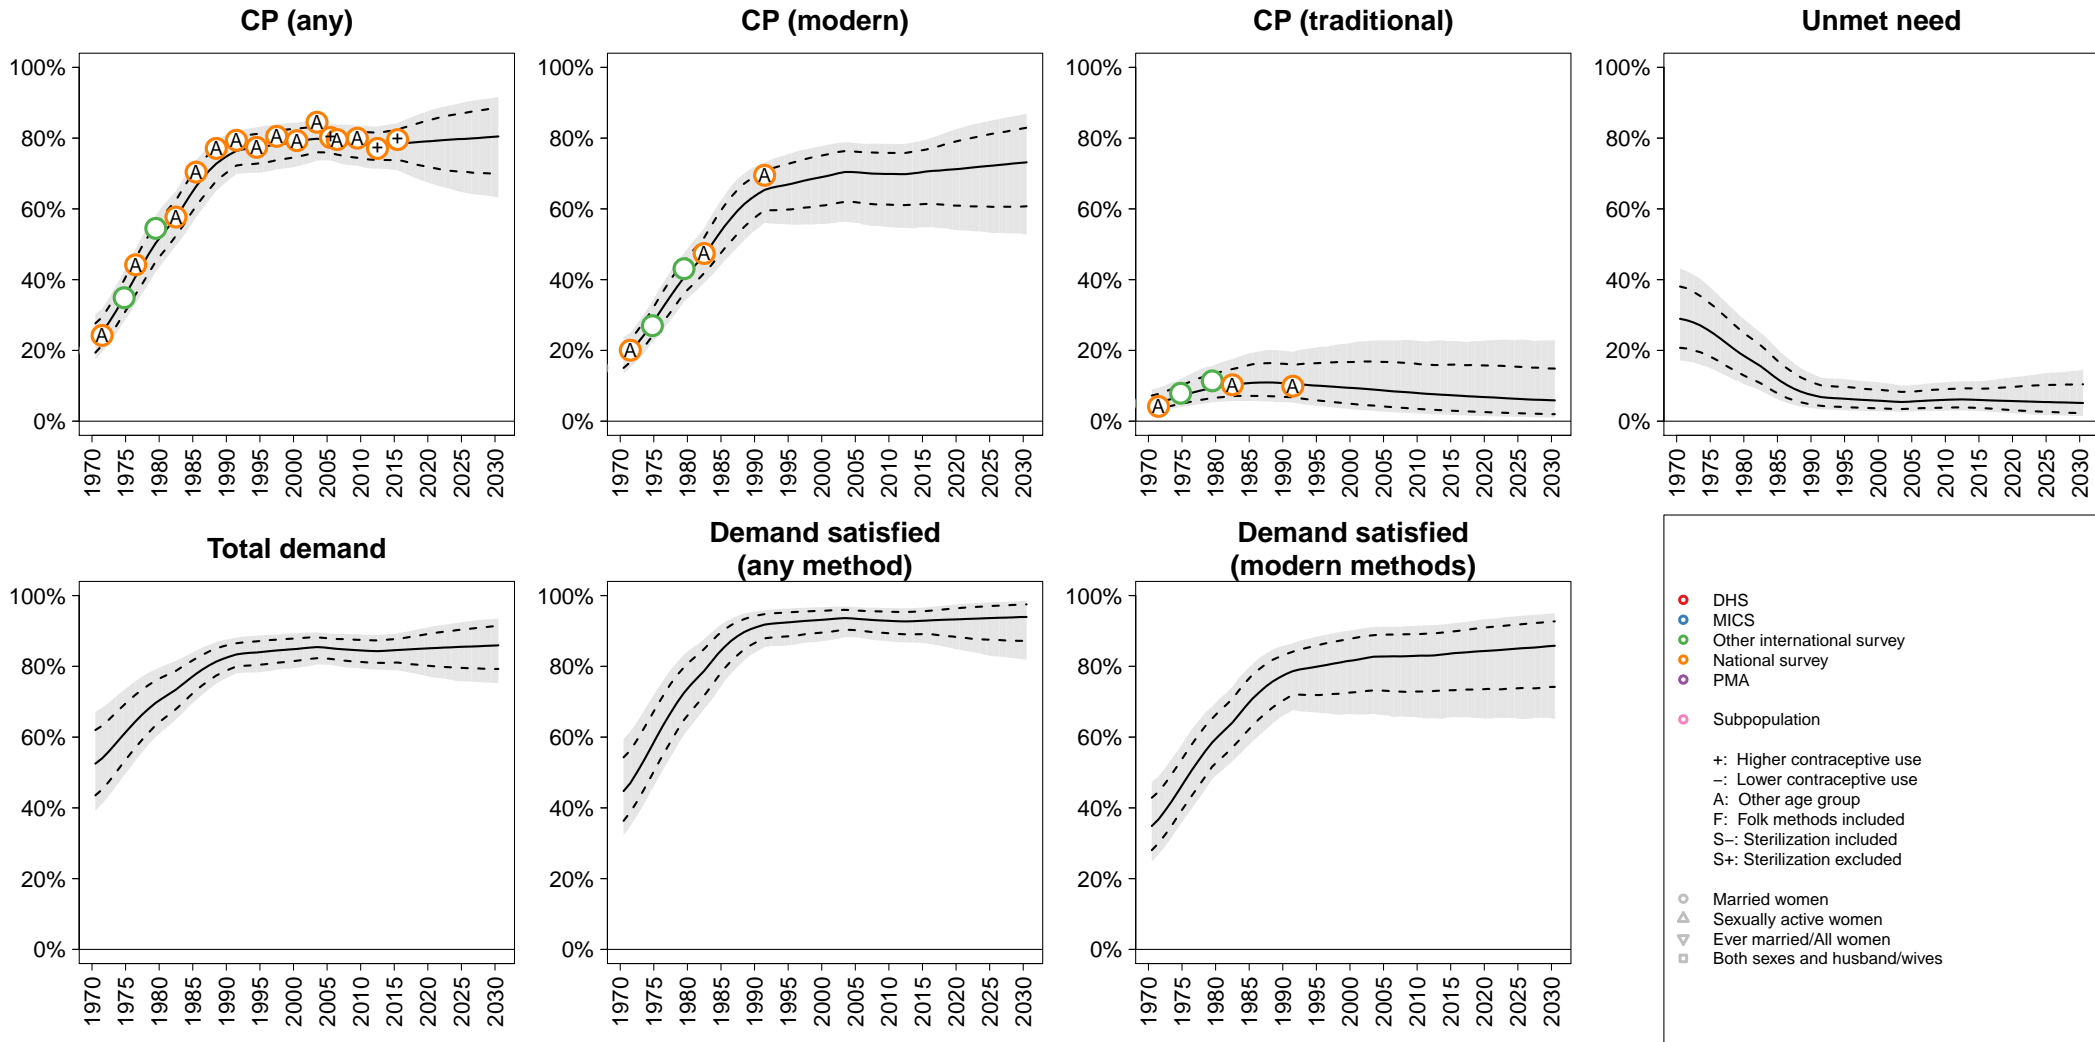

Republic of Moldova (Eastern Europe) --- Married / In-Union

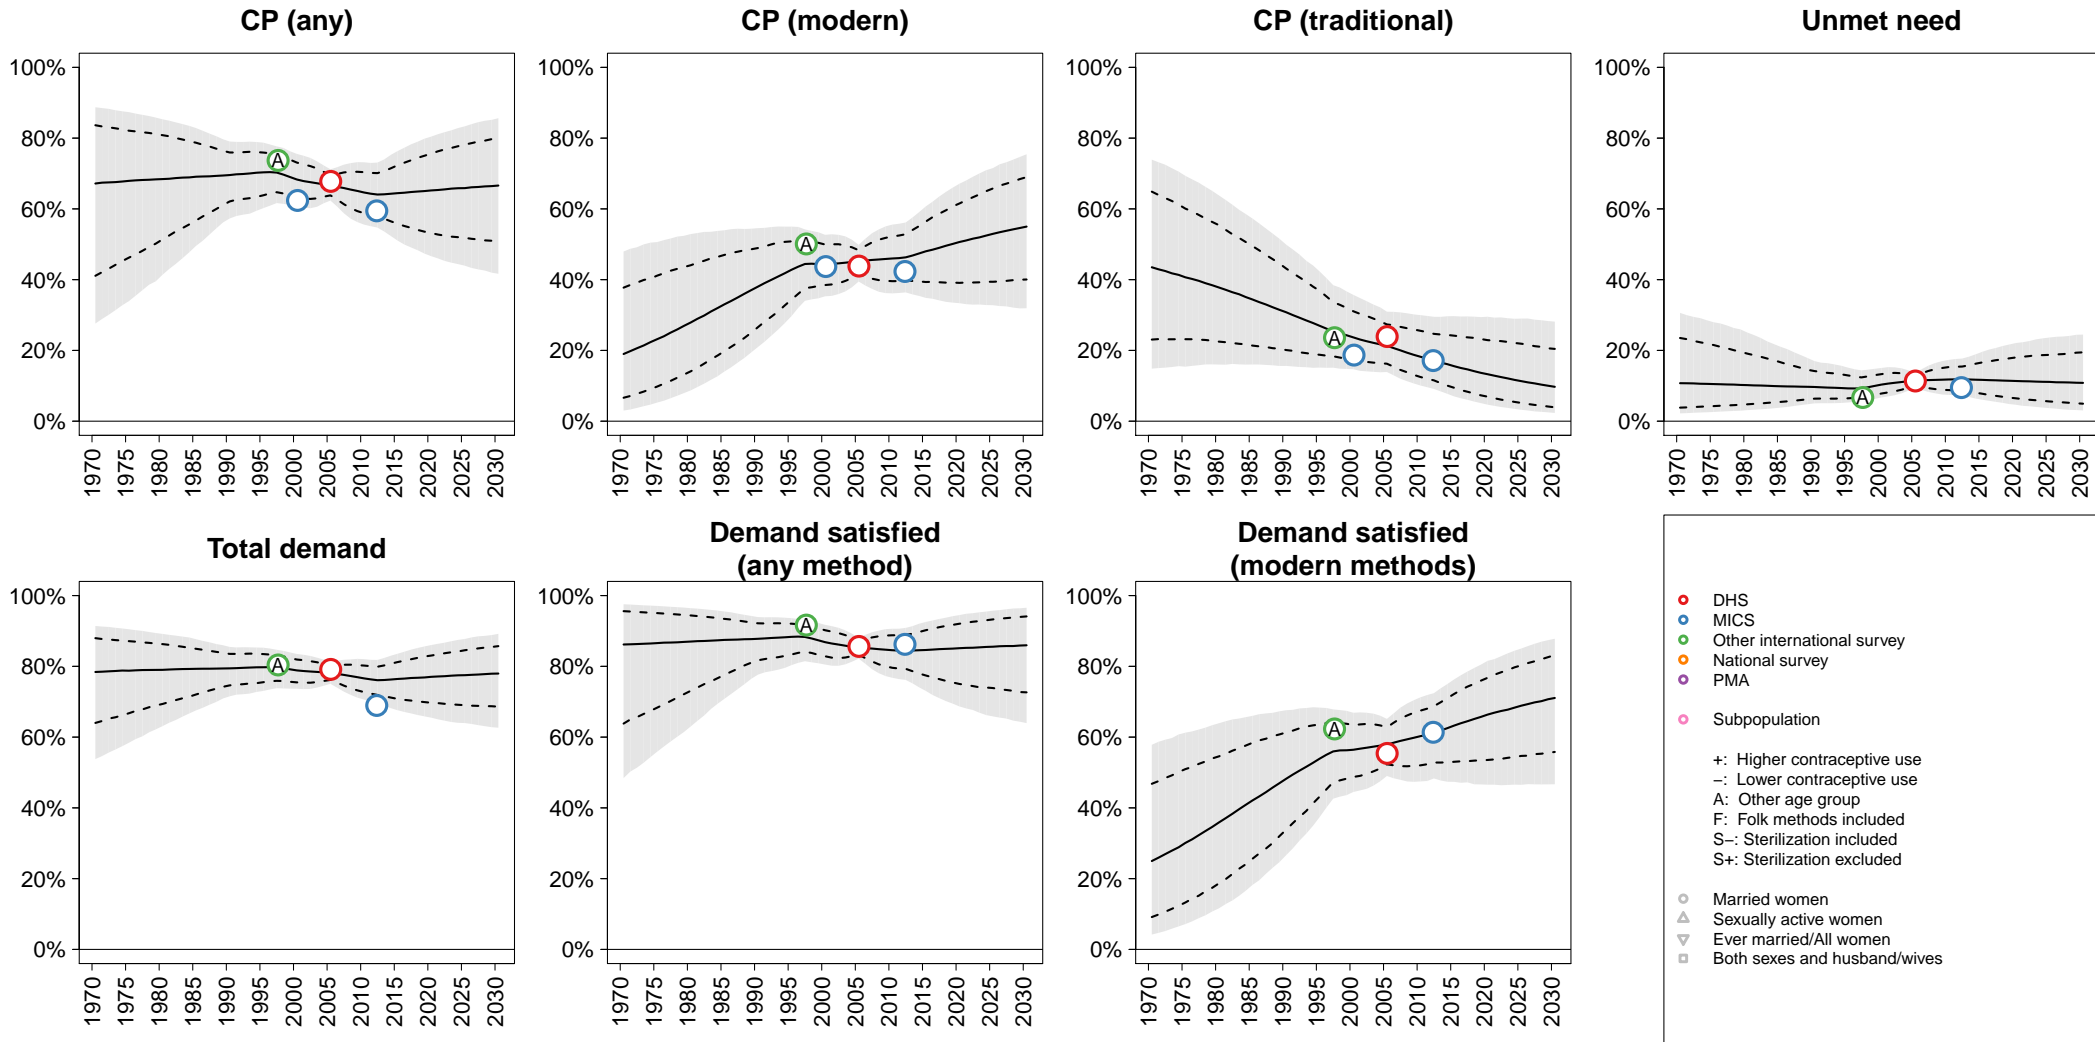

Réunion (Eastern Africa) --- Married / In-Union

CP (any)

CP (modern)

CP (traditional)

Unmet need

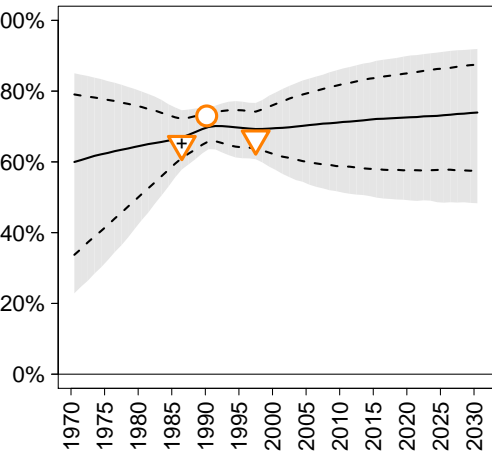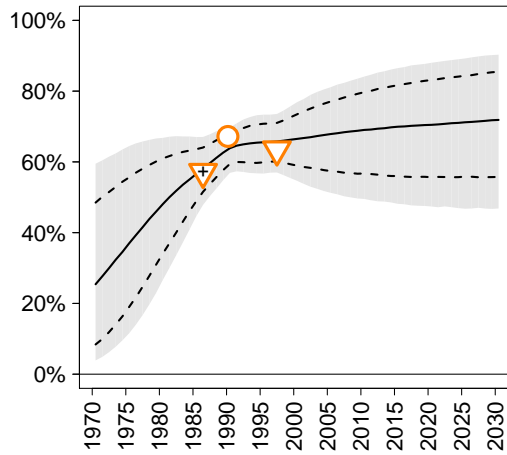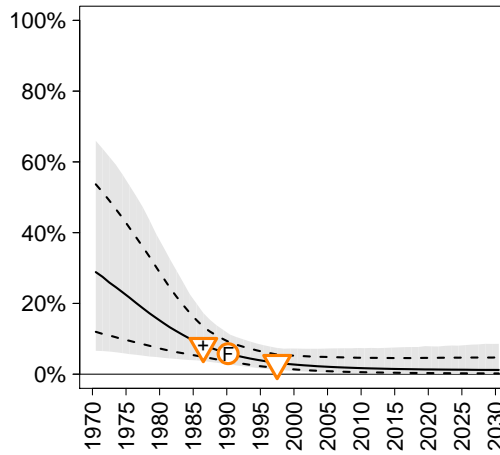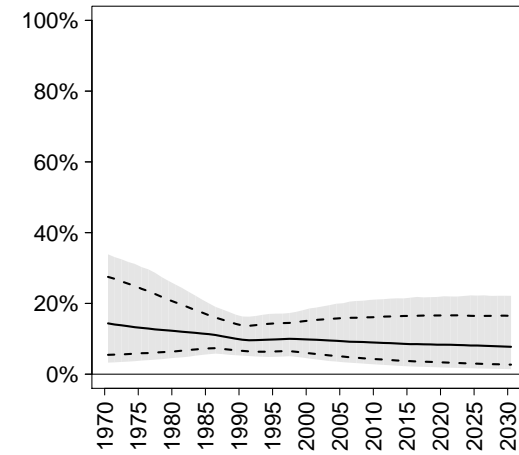

Total demand

Demand satisfied (any method)

Demand satisfied (modern methods)

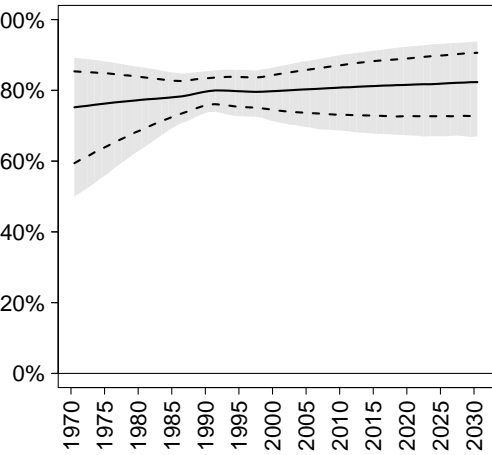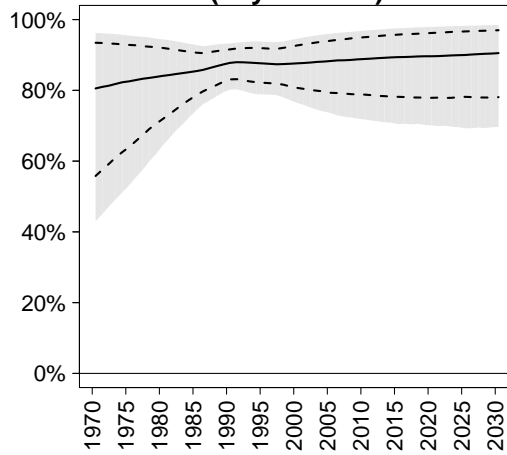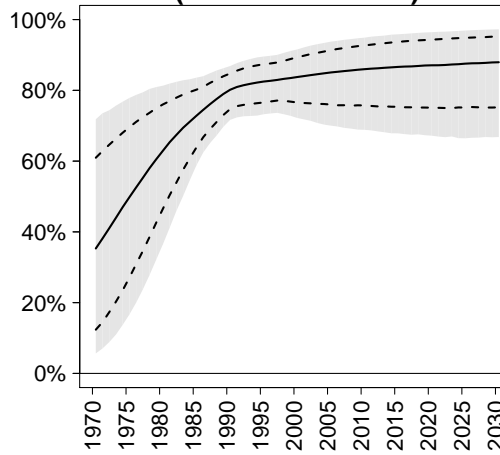

Romania (Eastern Europe) --- Married / In-Union

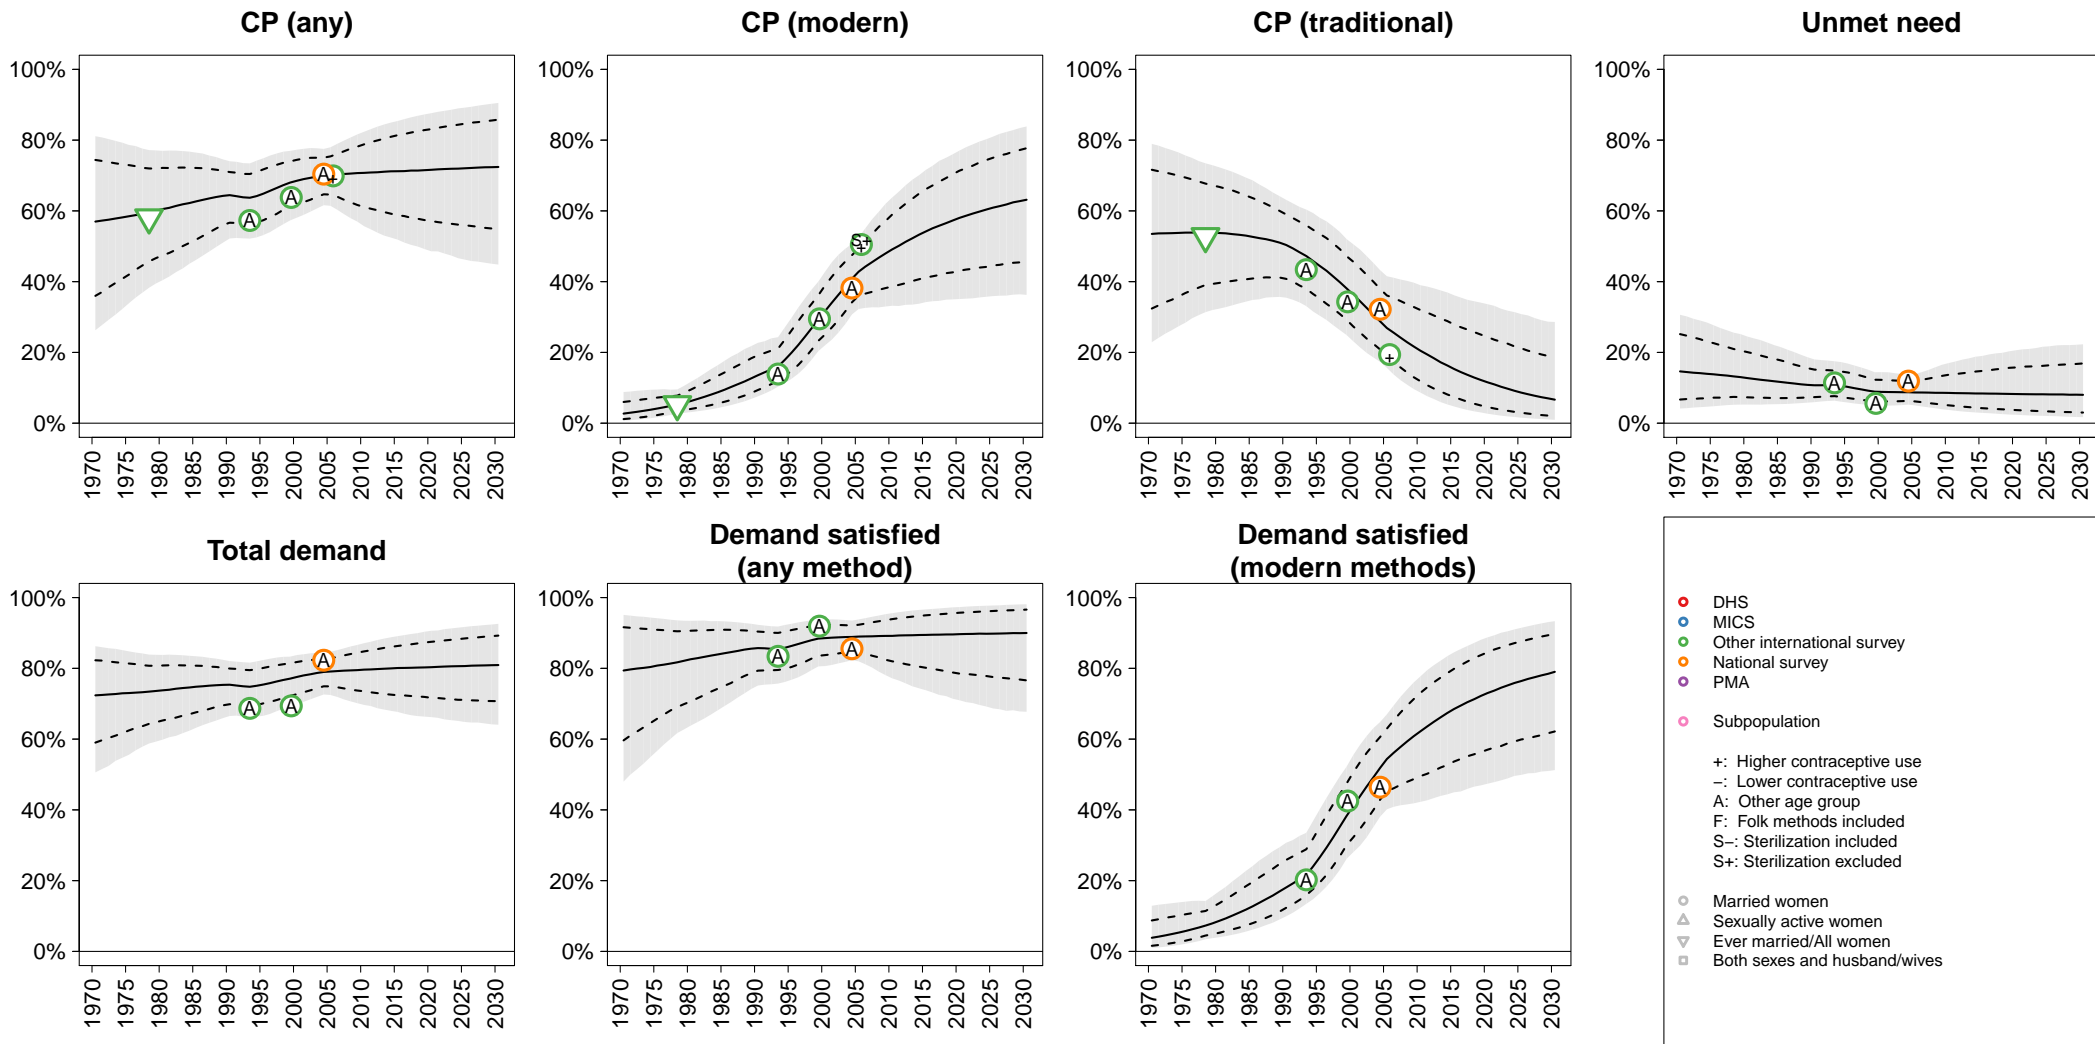

Russian Federation (Eastern Europe) --- Married / In-Union

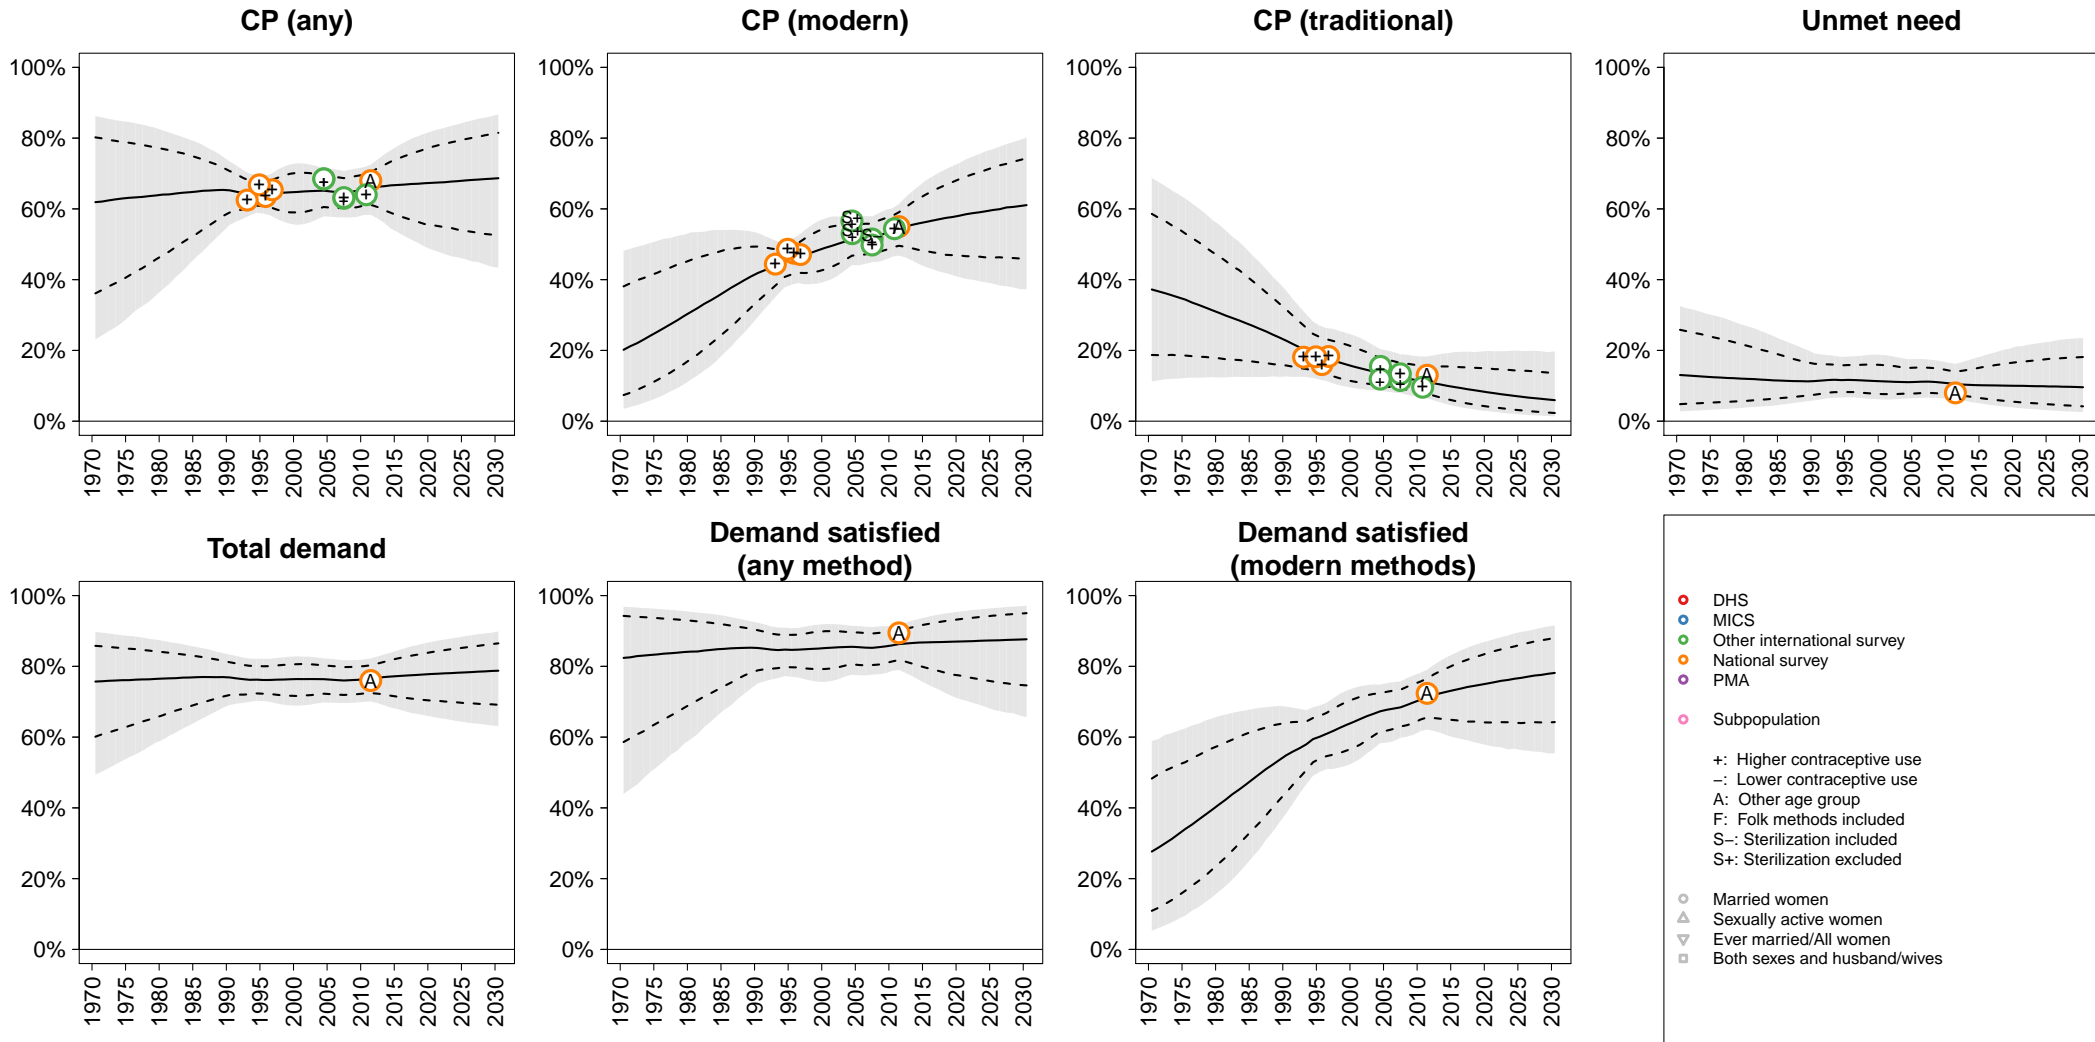



Rwanda (Eastern Africa) --- Married / In-Union

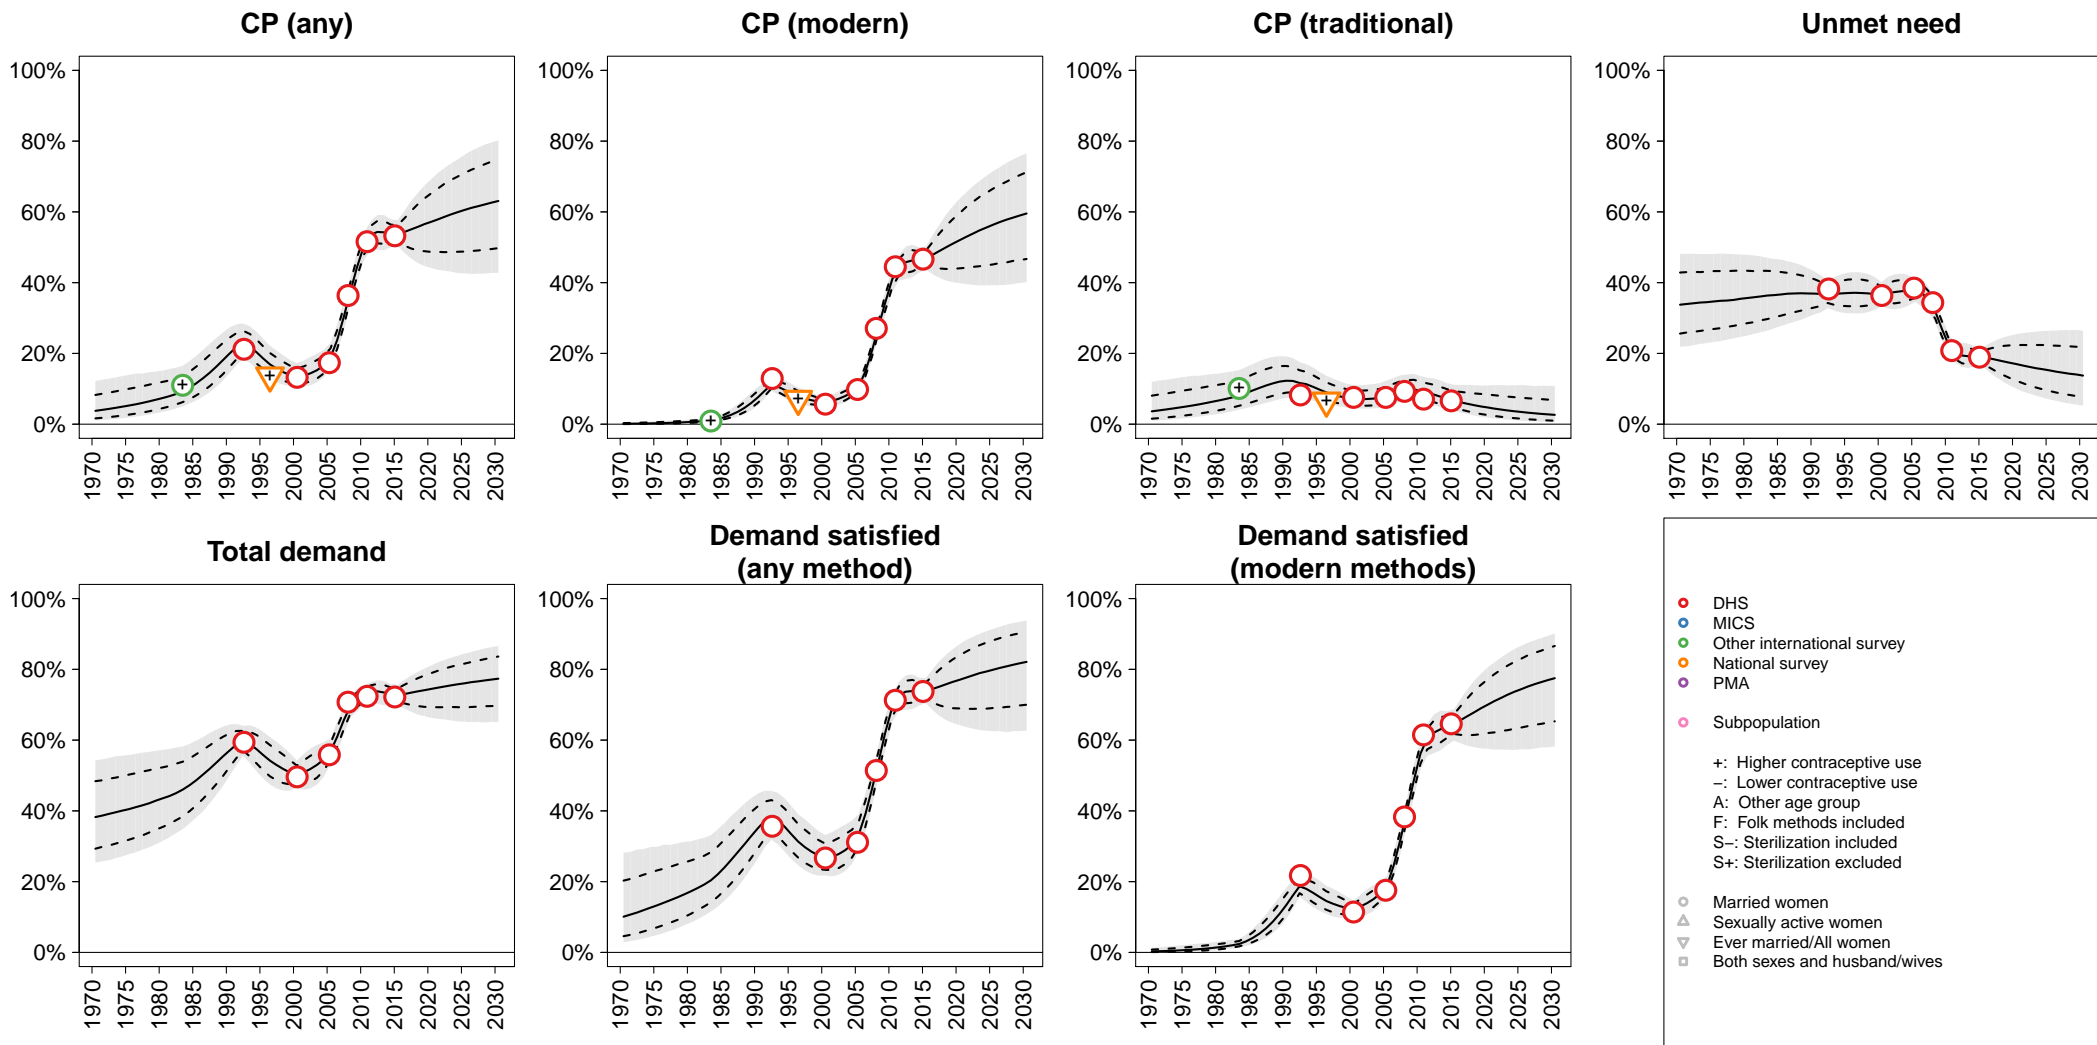

Samoa (Polynesia) --- Married / In-Union

CP (any)

CP (modern)

CP (traditional)

Unmet need

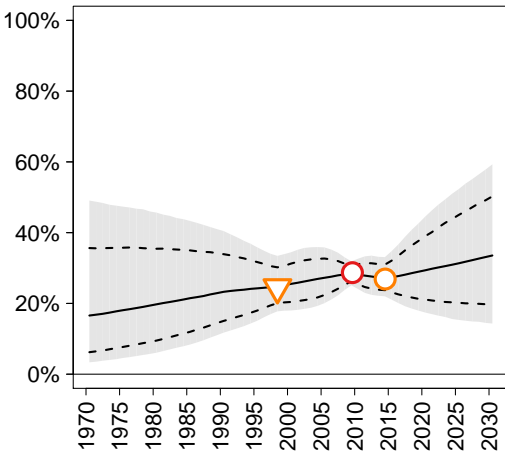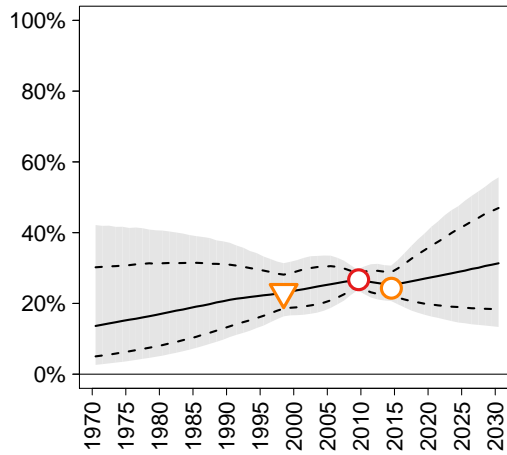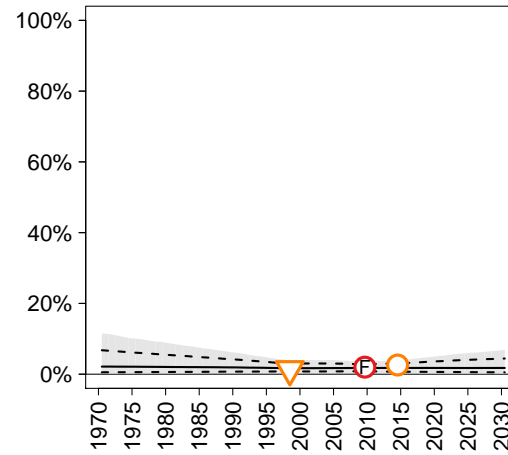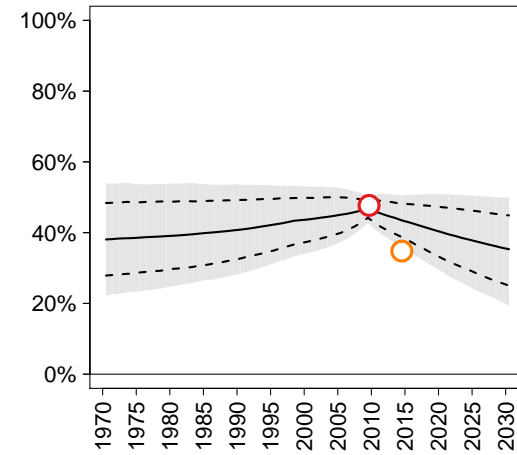

Total demand

Demand satisfied (any method)

Demand satisfied (modern methods)

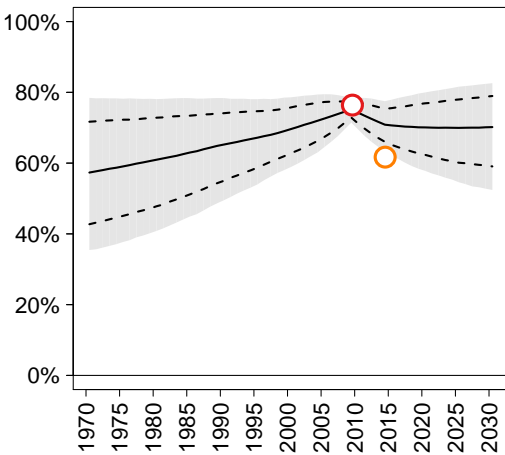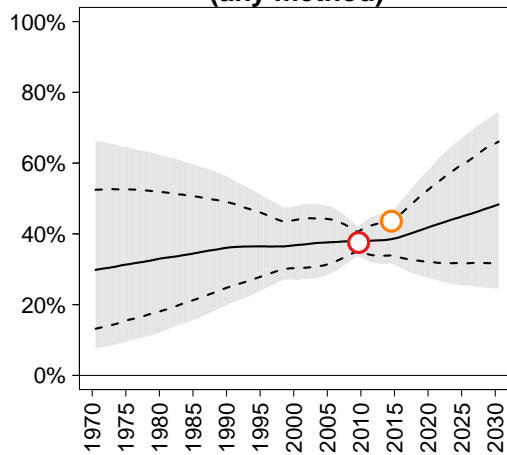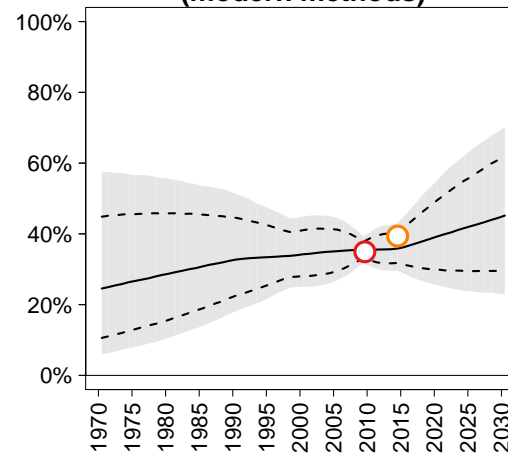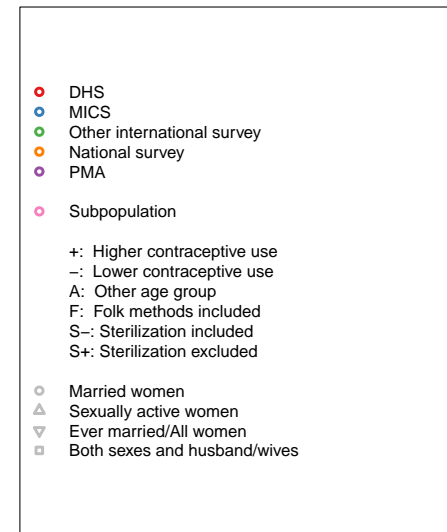

Sao Tome and Principe (Middle Africa) --- Married / In-Union

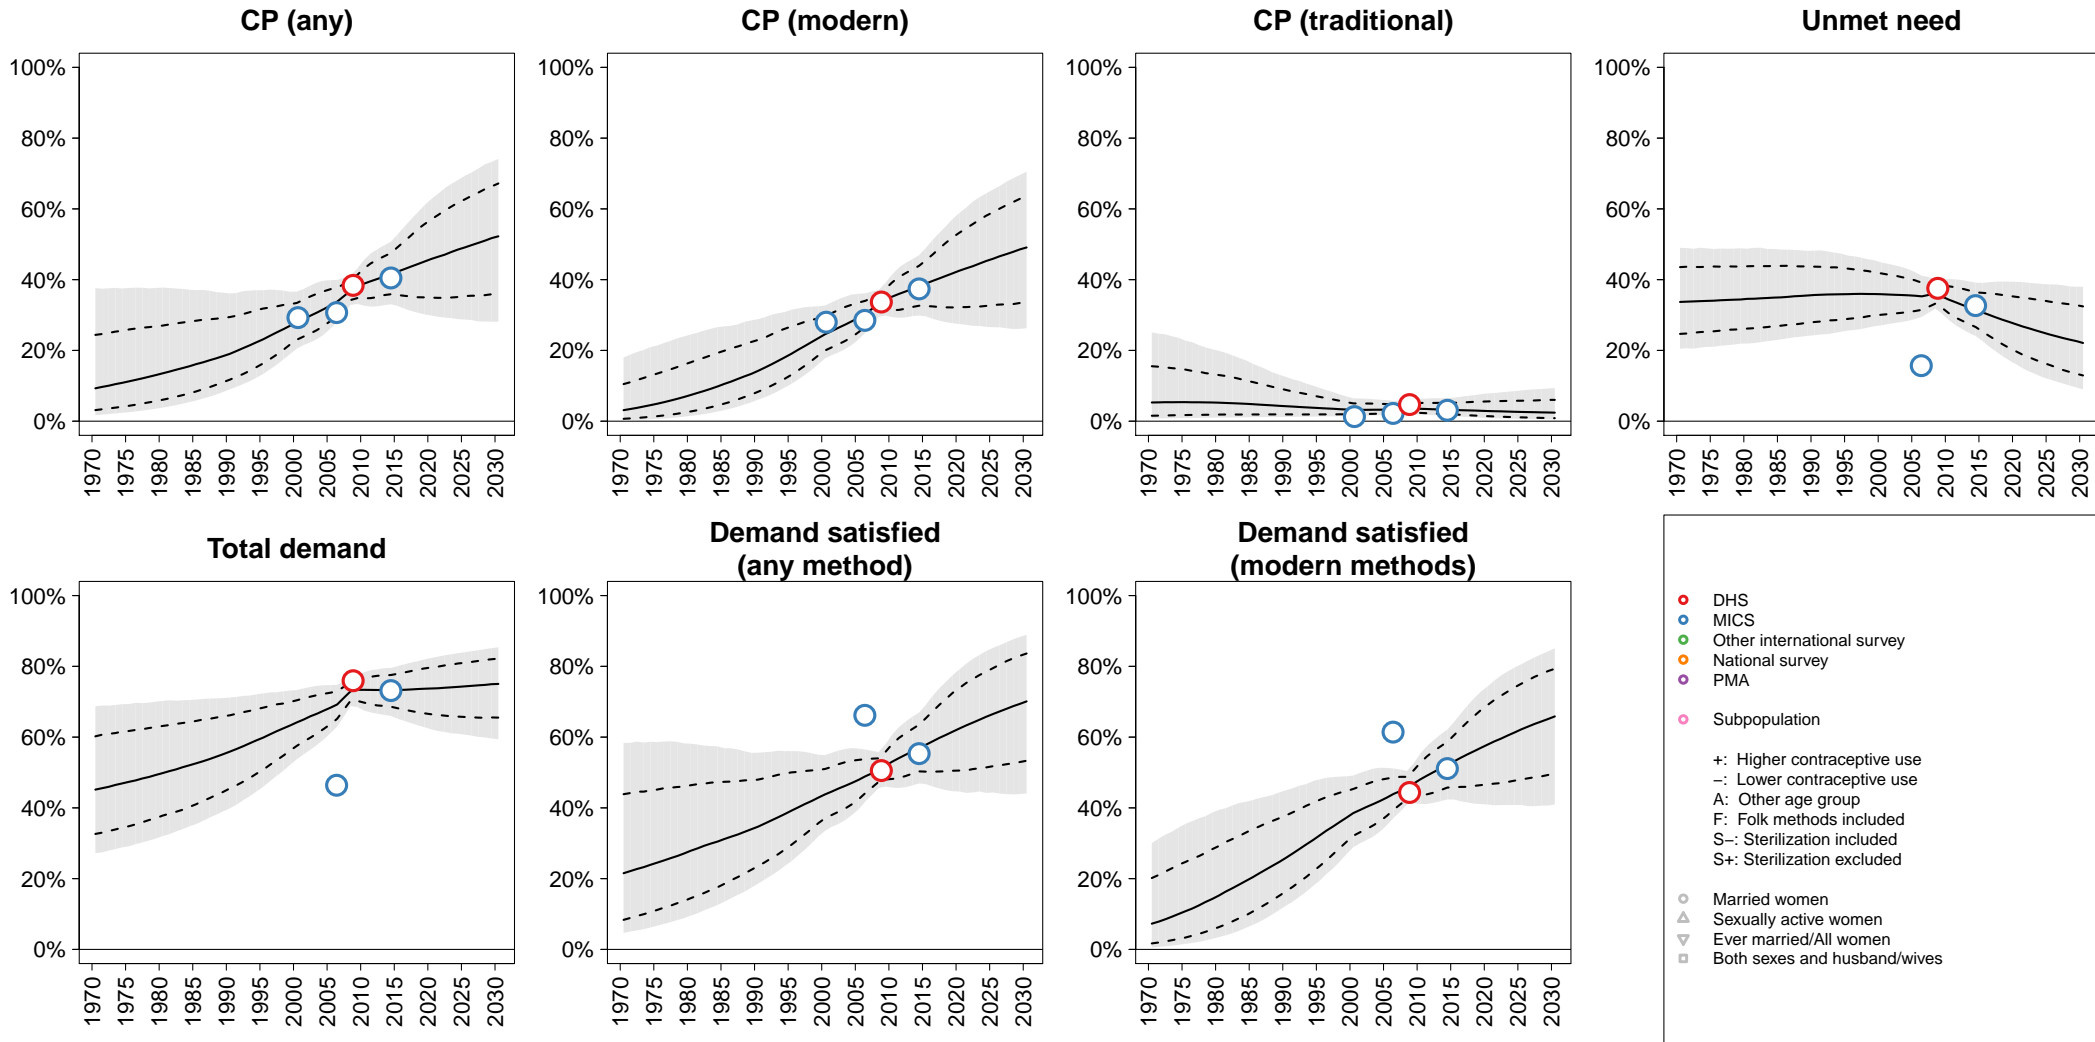

Saudi Arabia (Western Asia) --- Married / In-Union

CP (any)

CP (modern)

CP (traditional)

Unmet need

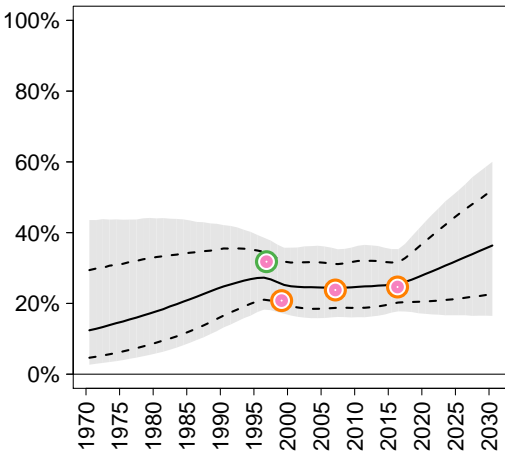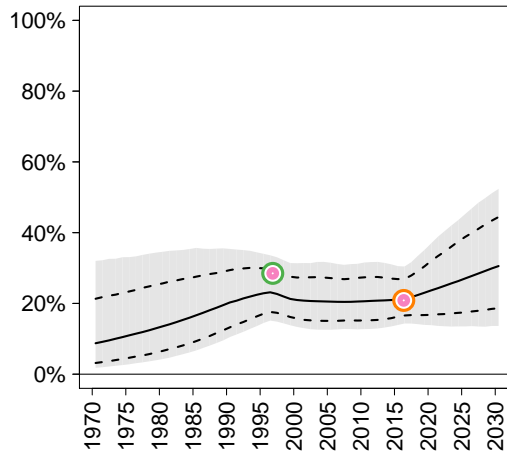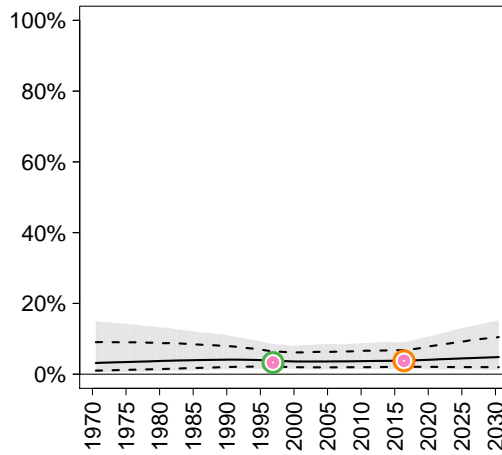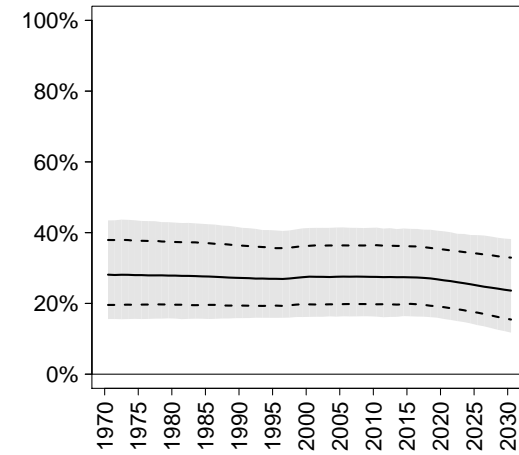

Total demand

Demand satisfied (any method)

Demand satisfied (modern methods)

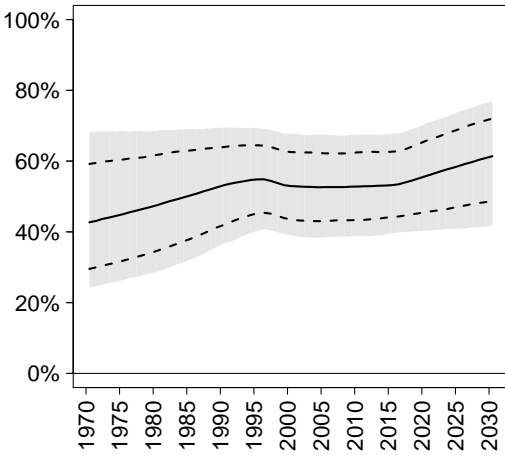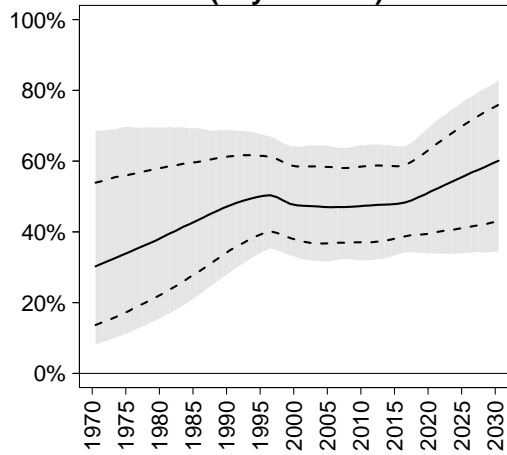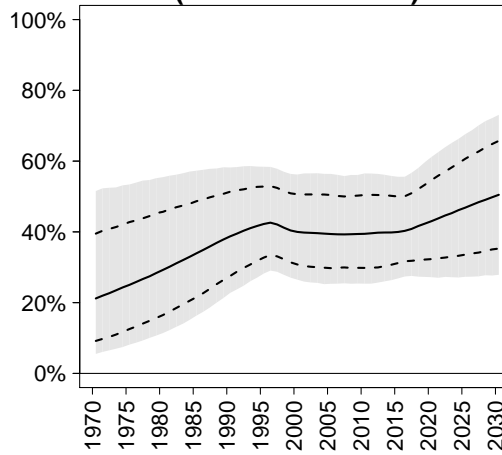

Senegal (Western Africa) --- Married / In-Union

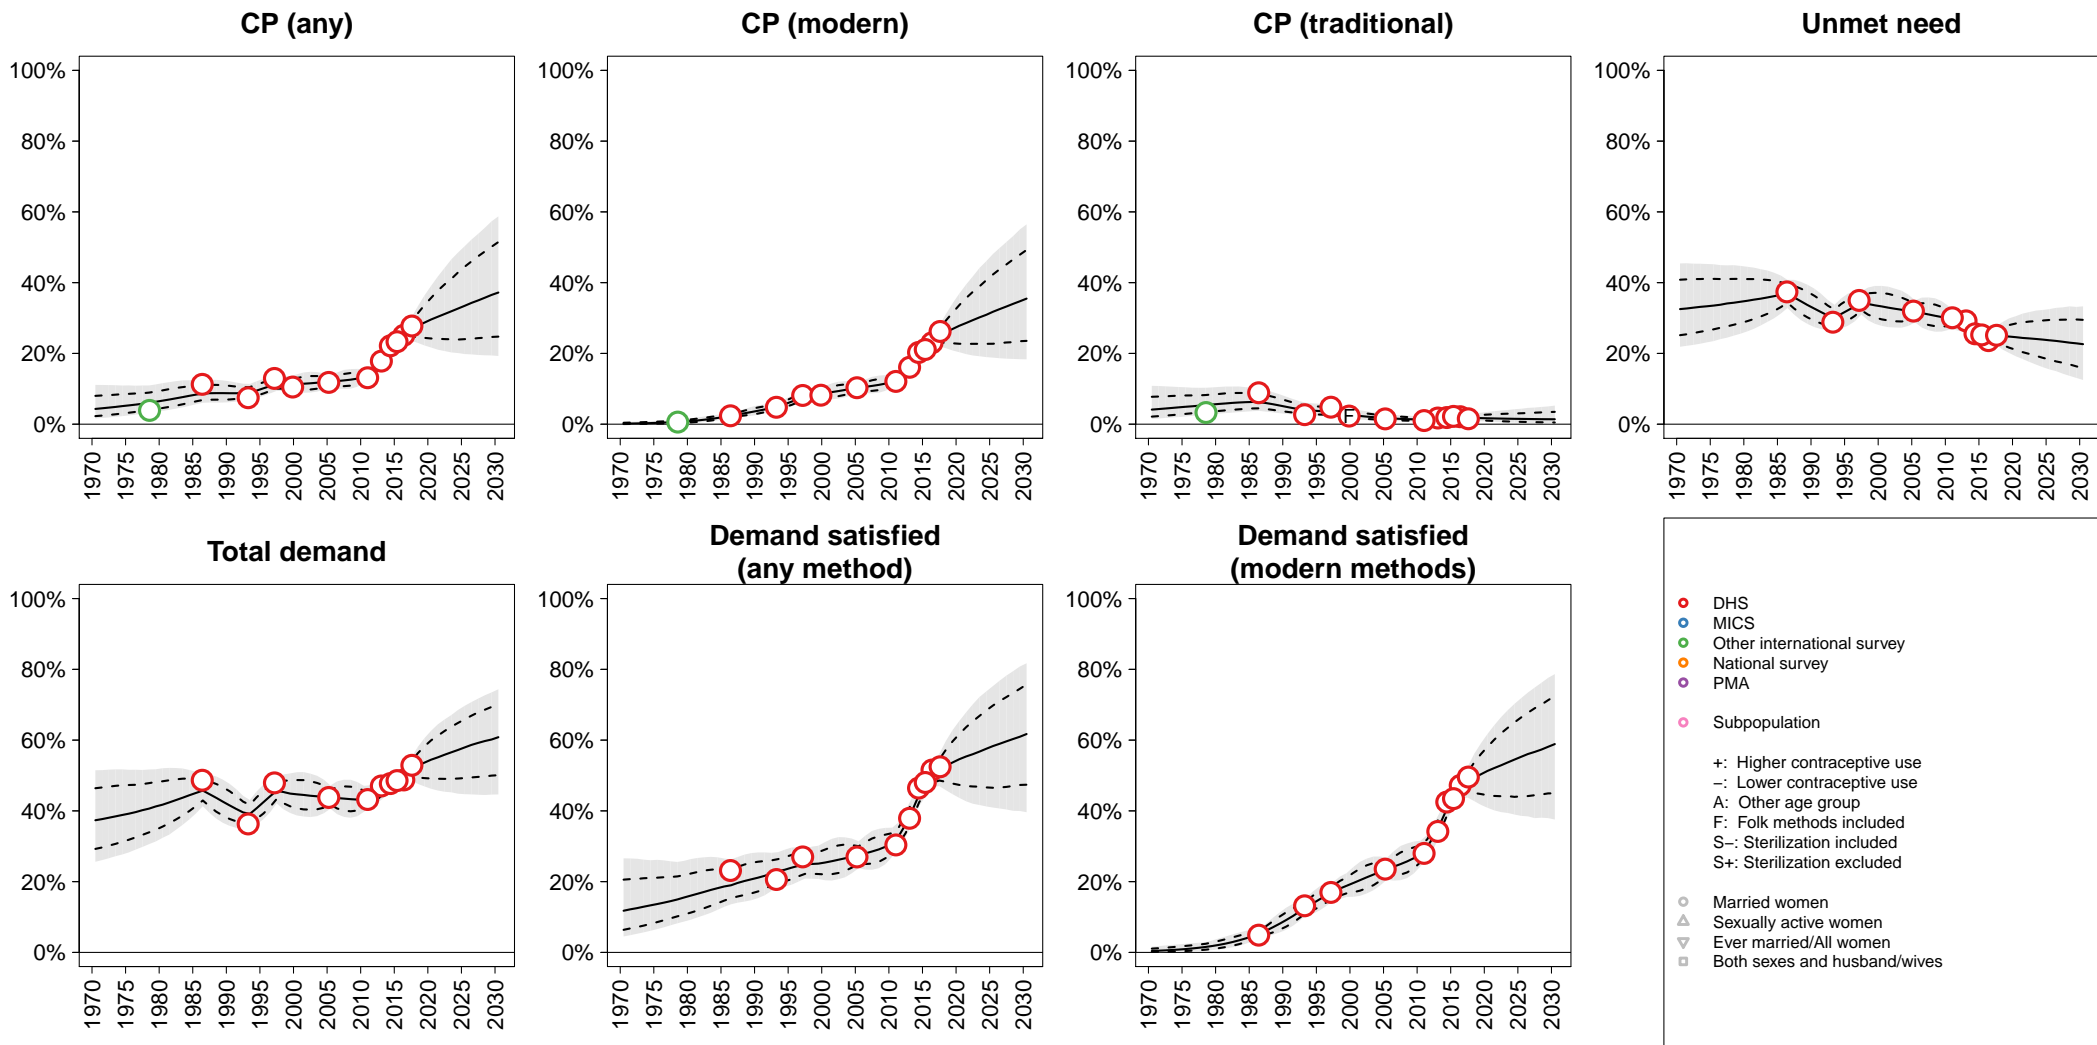

Serbia (Southern Europe) --- Married / In-Union

CP (any)

CP (modern)

CP (traditional)

Unmet need

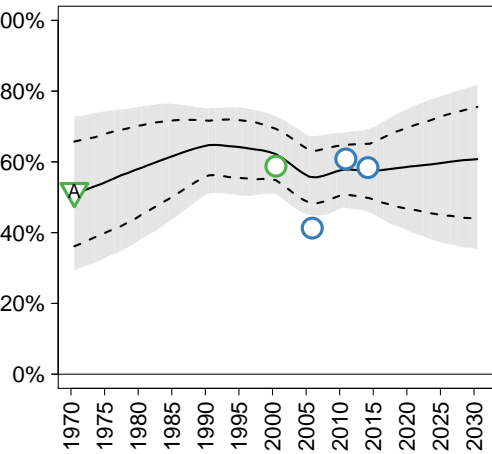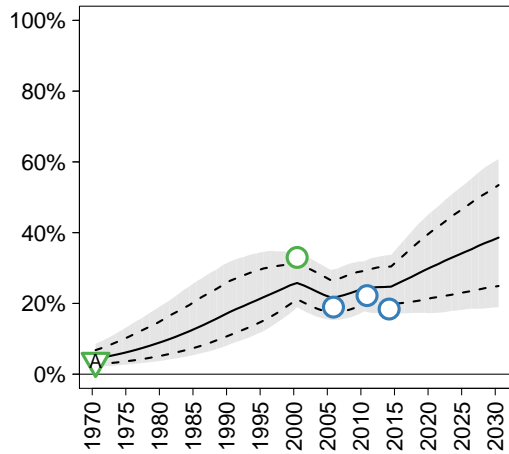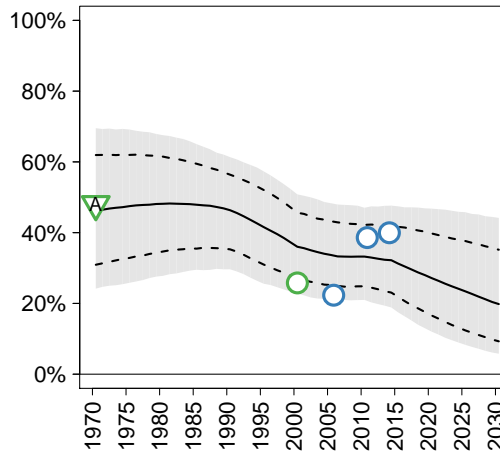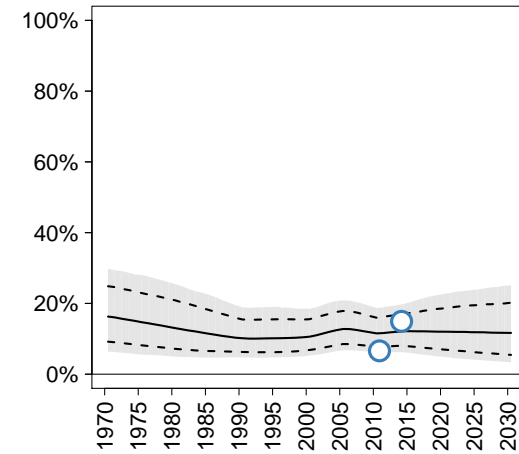

Total demand

Demand satisfied (any method)

Demand satisfied (modern methods)

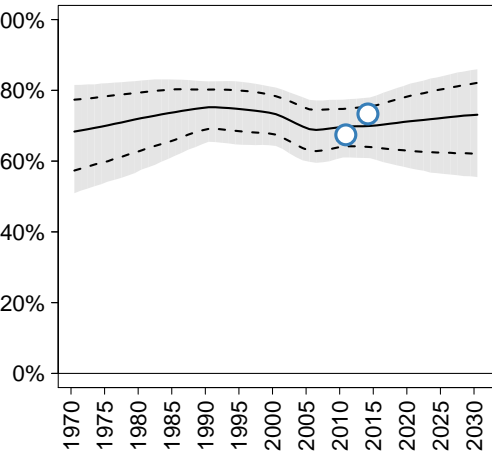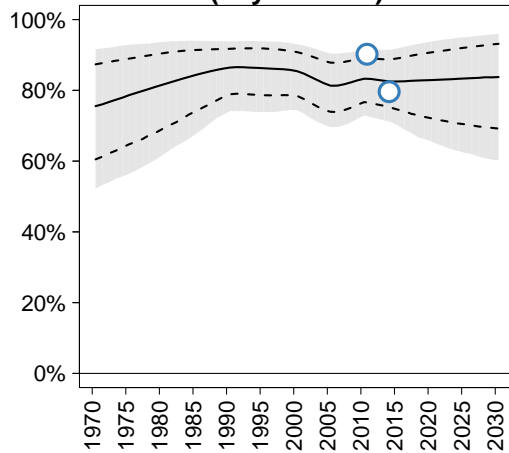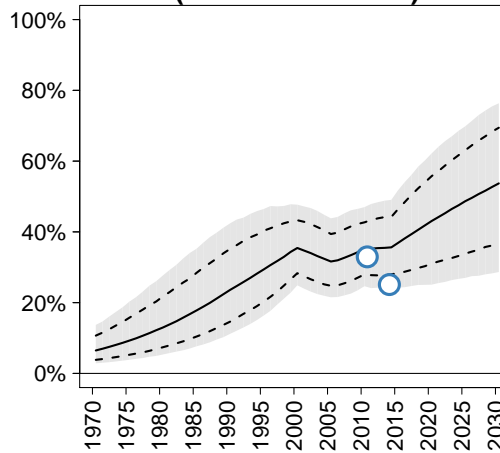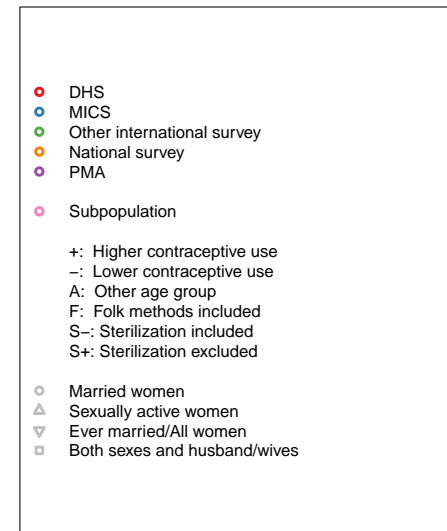

Sierra Leone (Western Africa) --- Married / In-Union

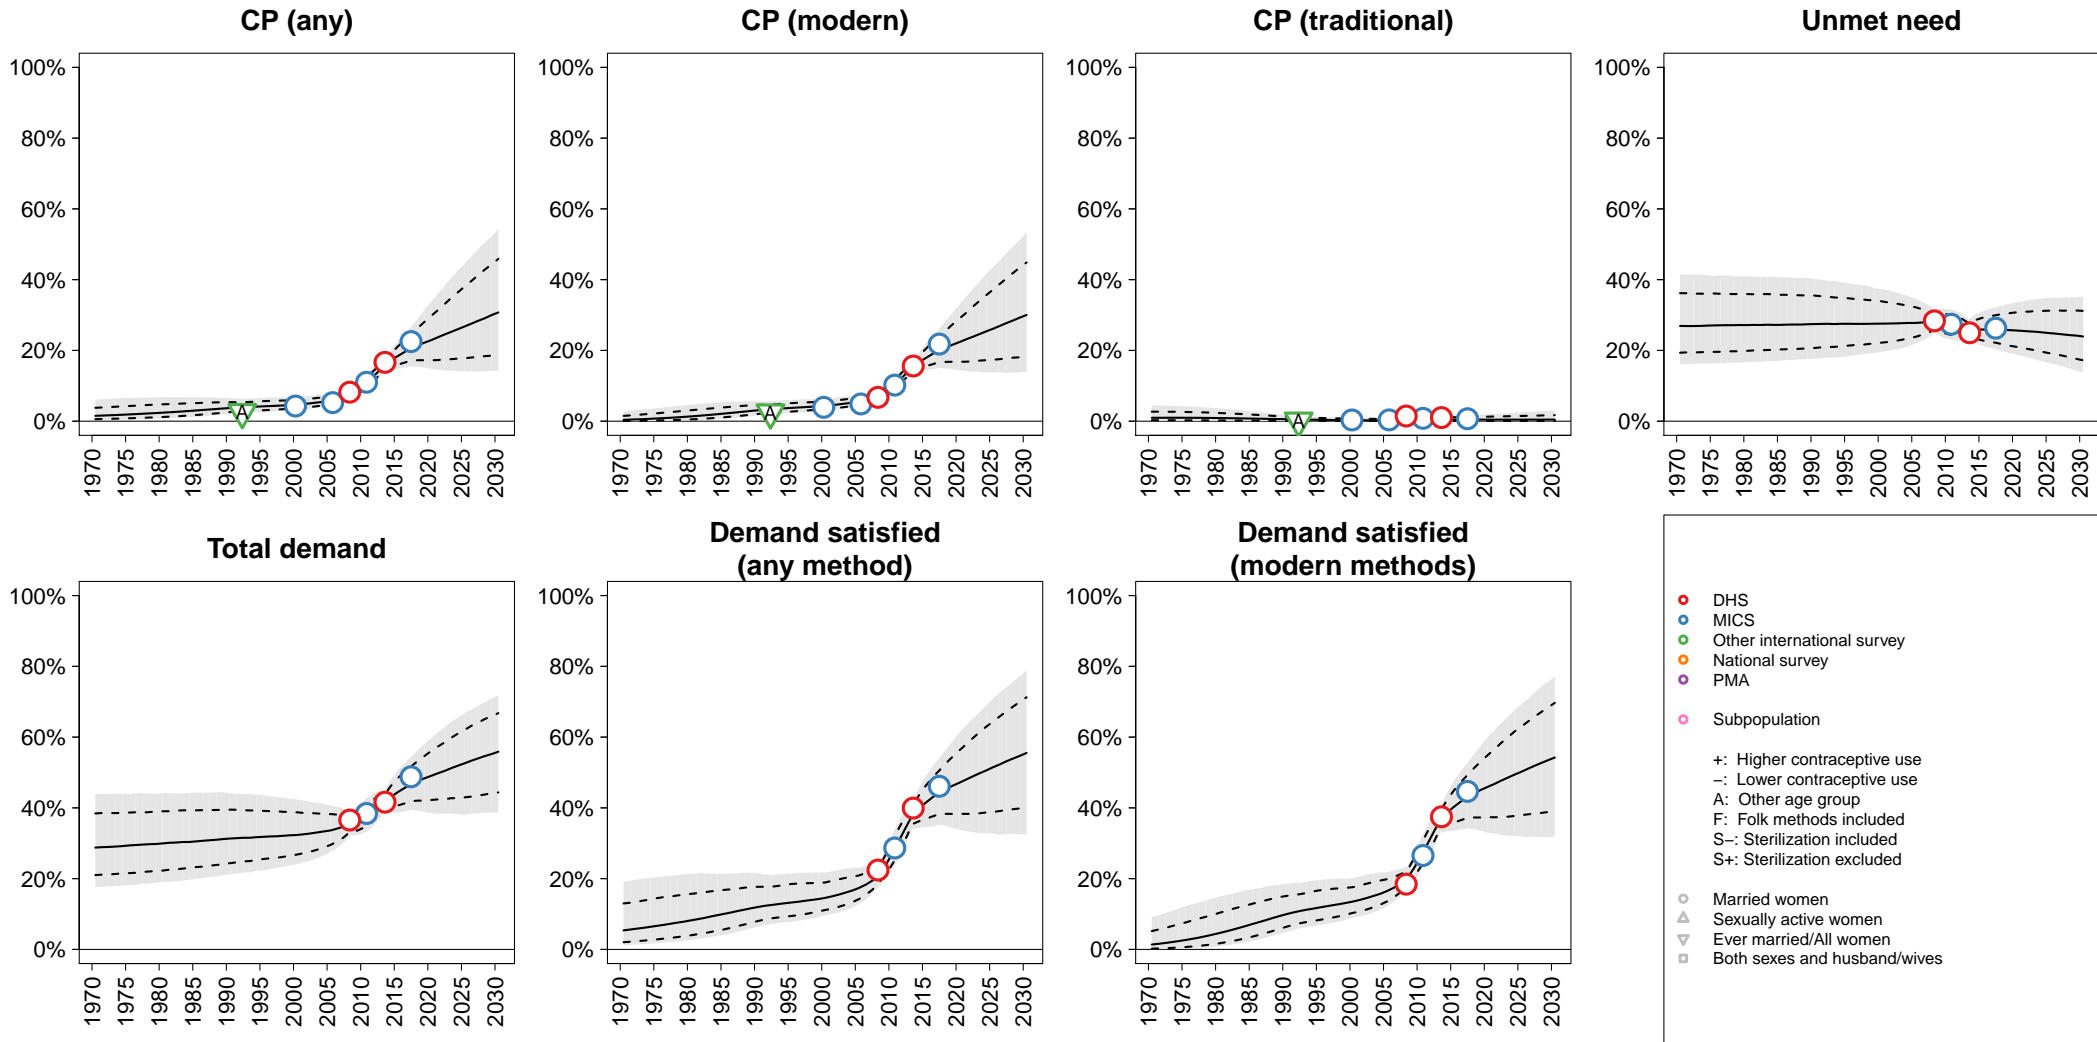

Singapore (South-eastern Asia) --- Married / In-Union

CP (any)

CP (modern)

CP (traditional)

Unmet need

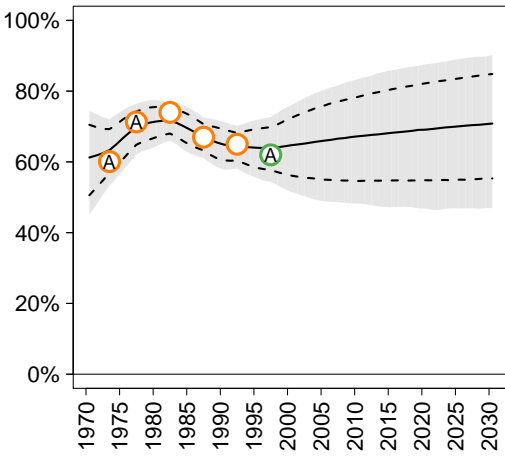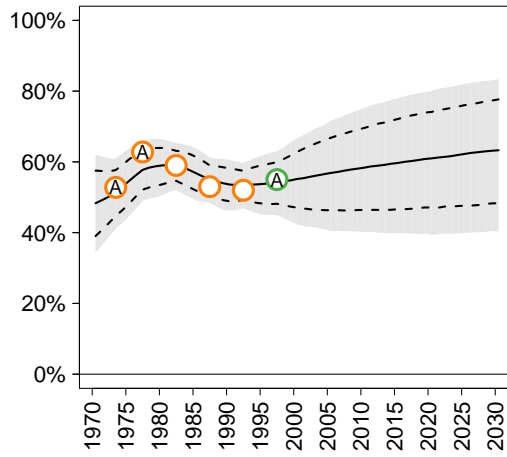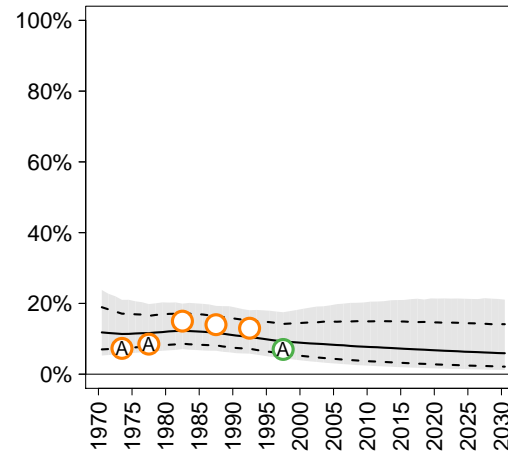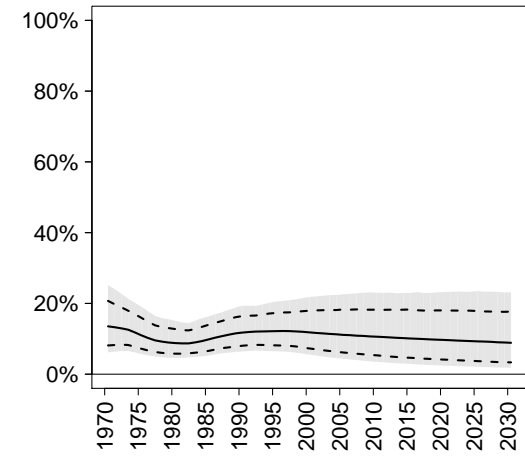

Total demand

Demand satisfied (any method)

Demand satisfied (modern methods)

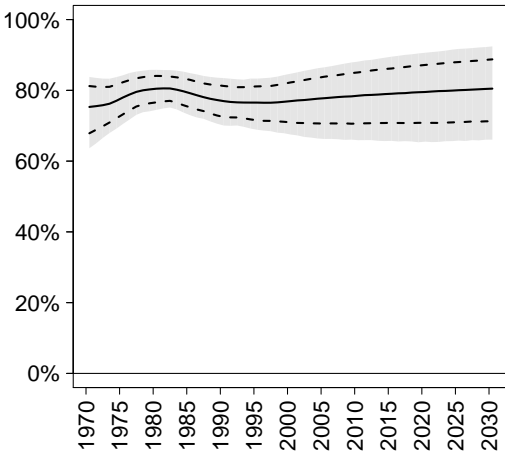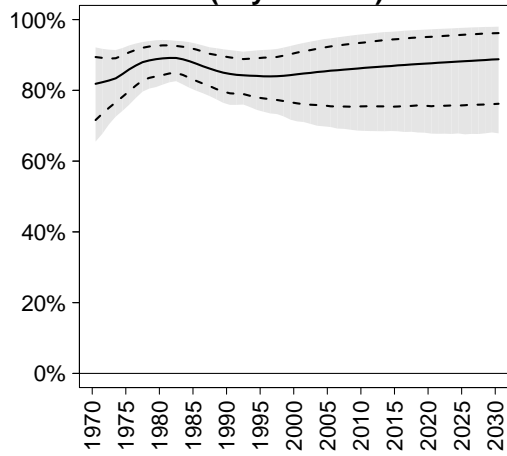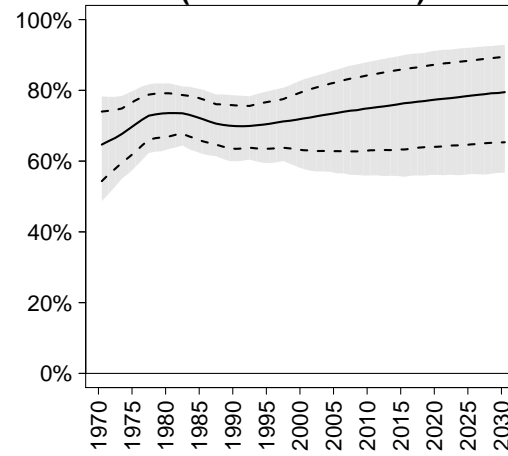



Slovakia (Eastern Europe) --- Married / In-Union

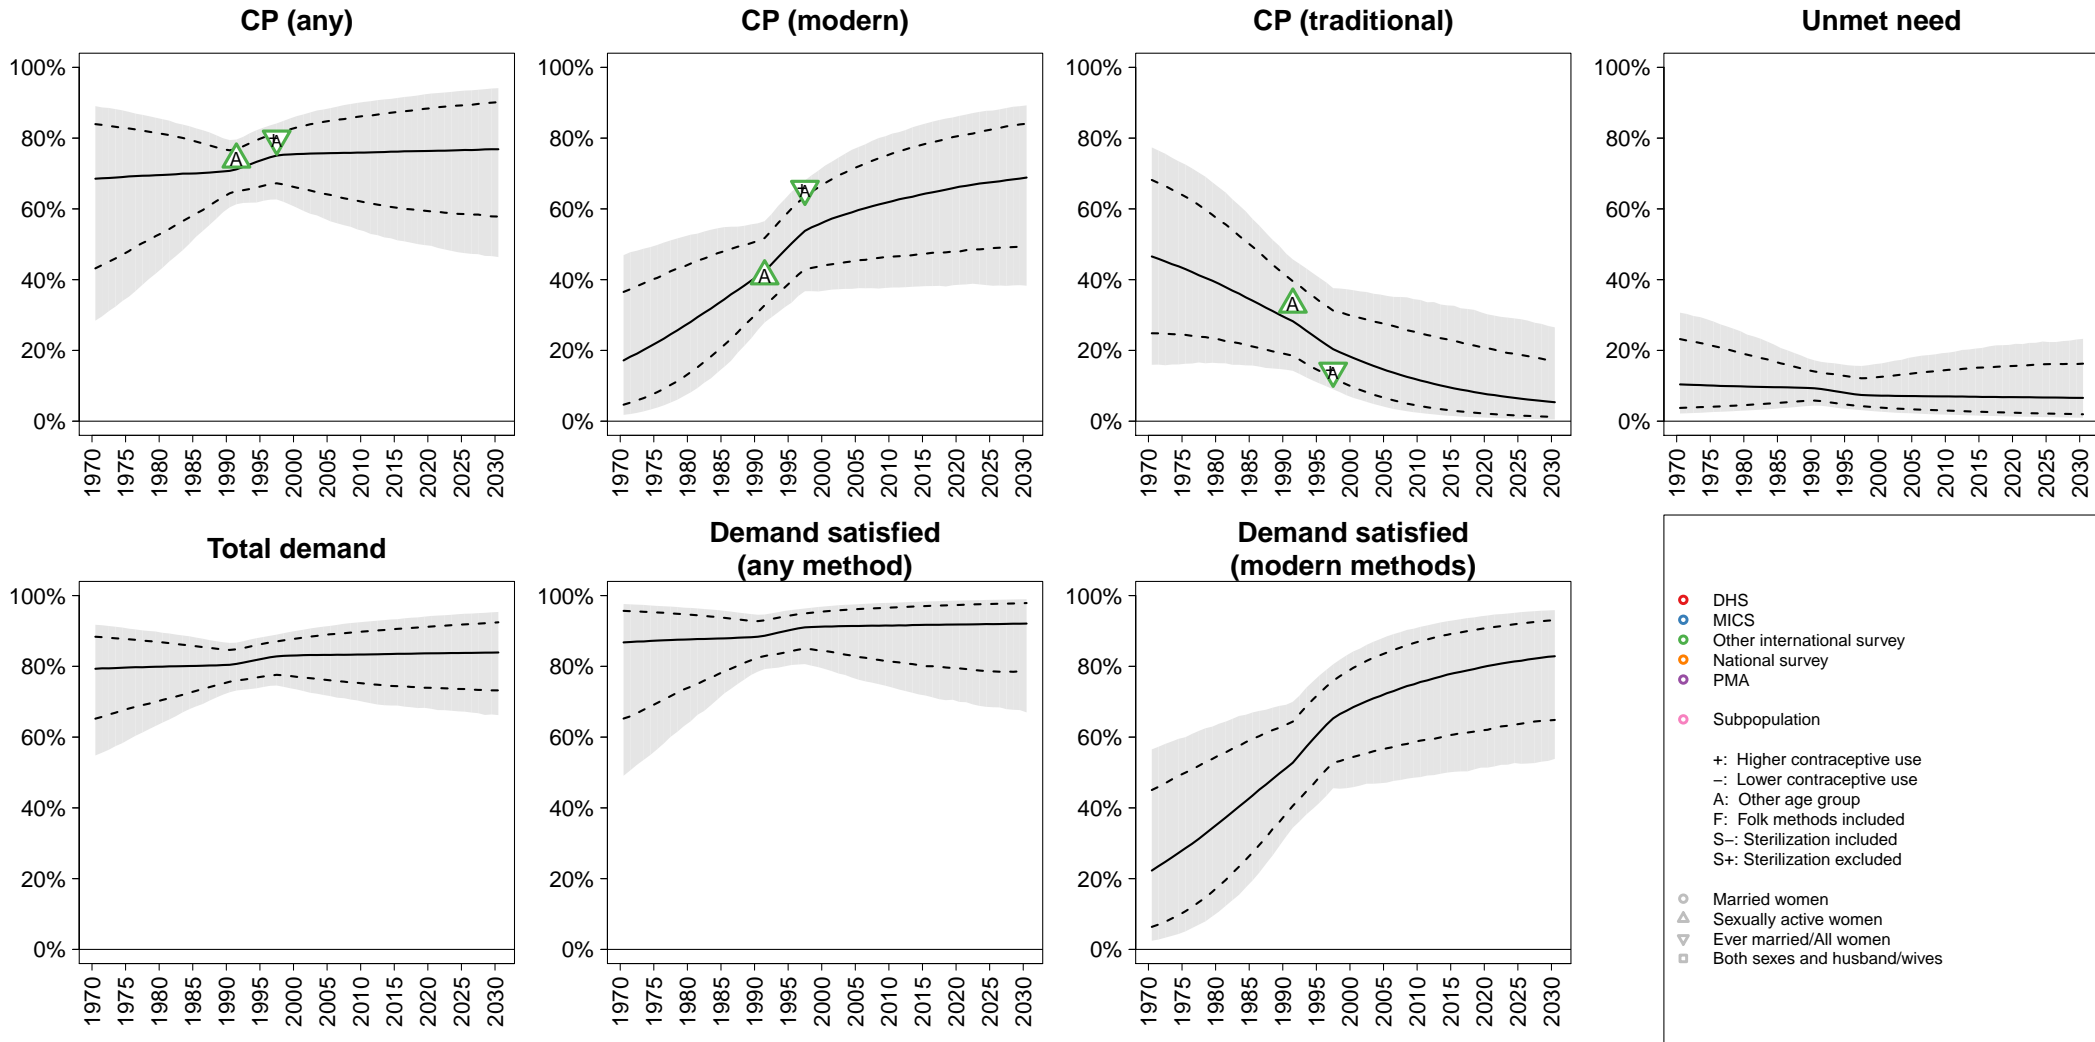

Slovenia (Southern Europe) --- Married / In-Union

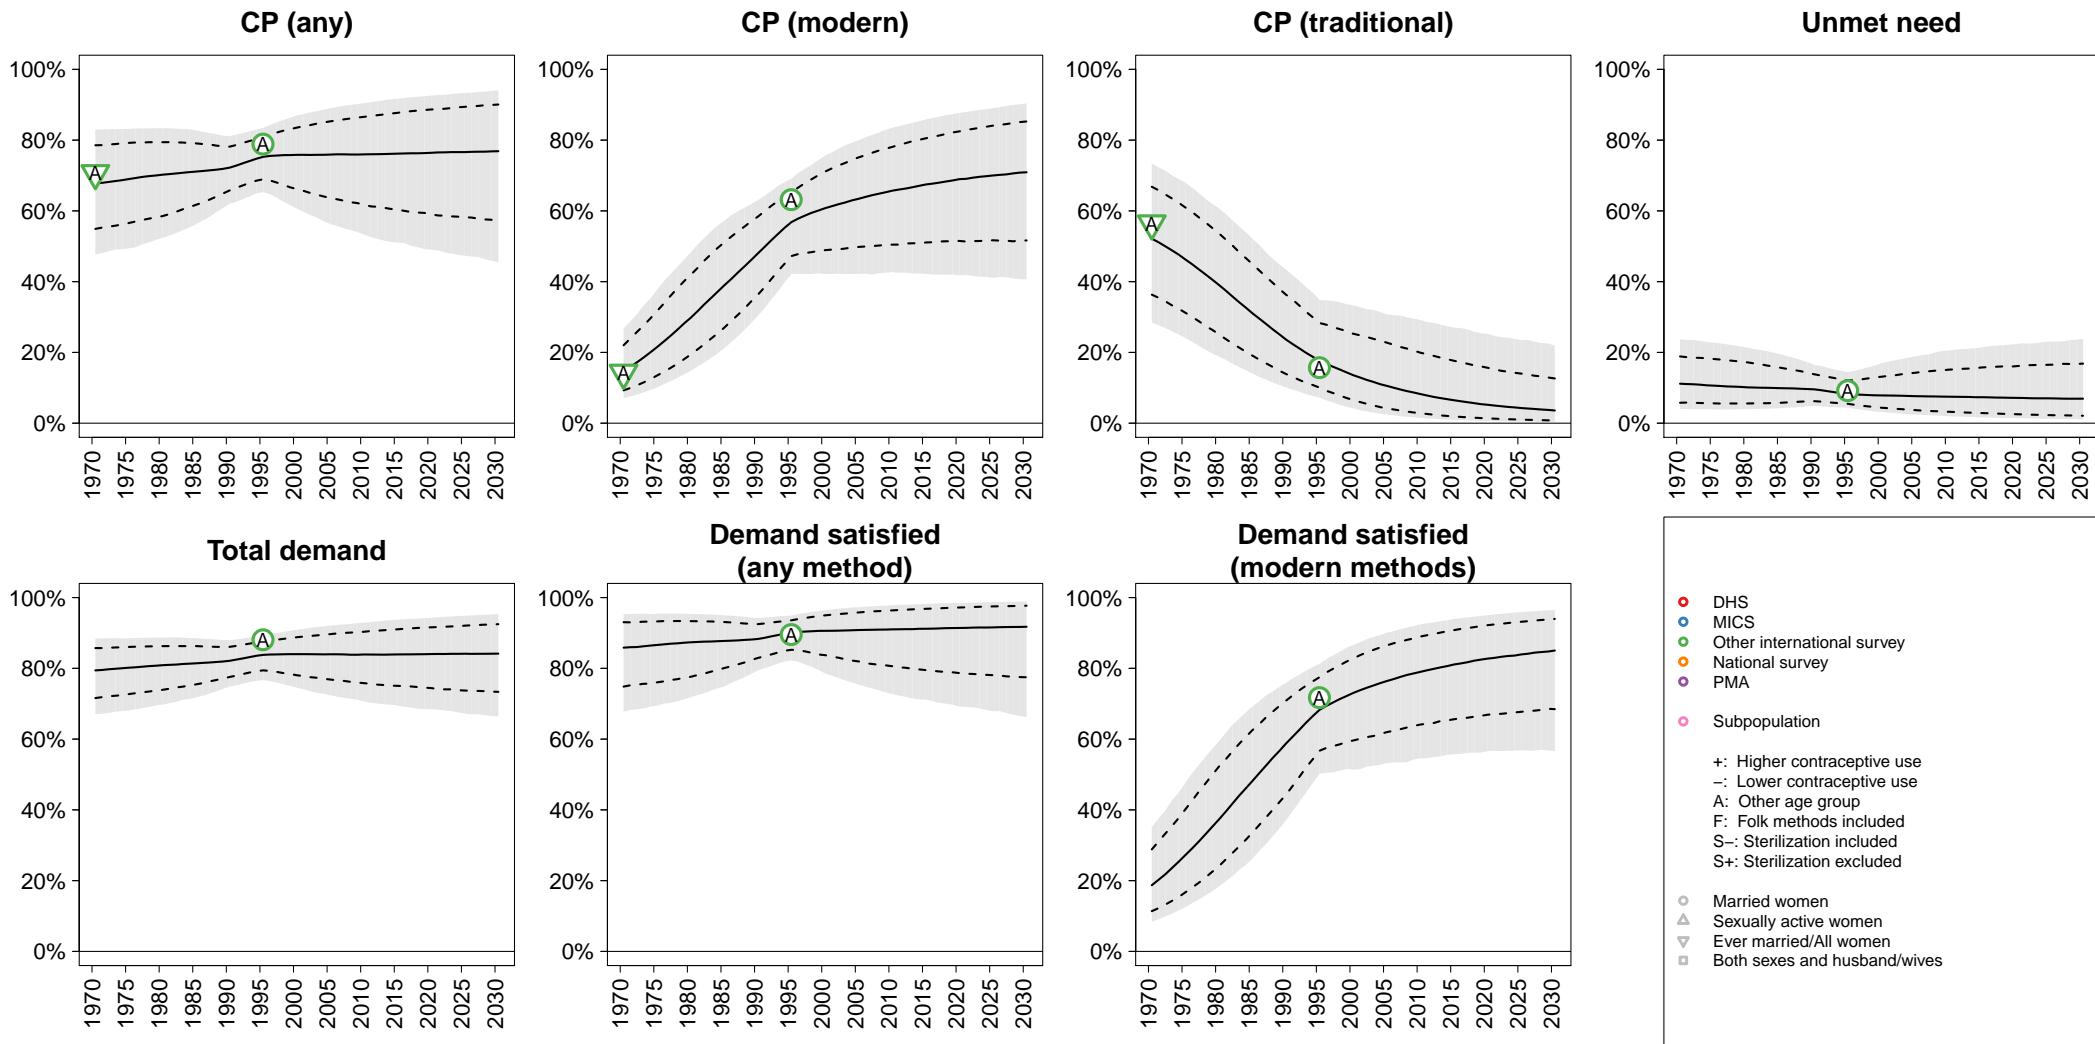

Solomon Islands (Melanesia) --- Married / In-Union

CP (any)

CP (modern)

CP (traditional)

Unmet need

Total demand

Demand satisfied (any method)

Demand satisfied (modern methods)

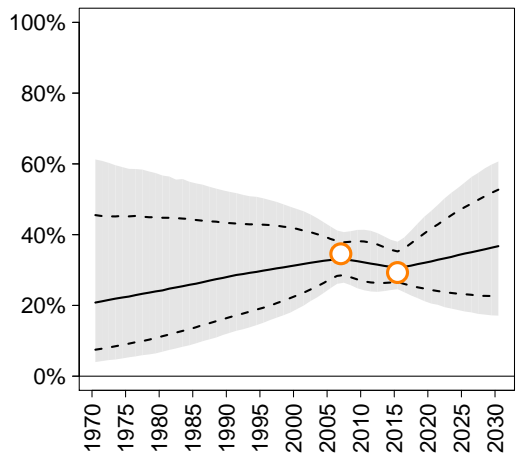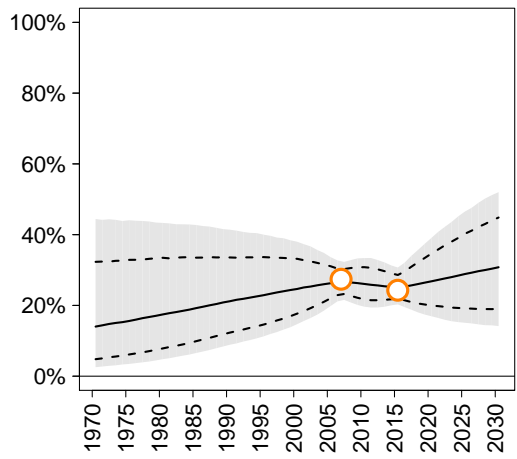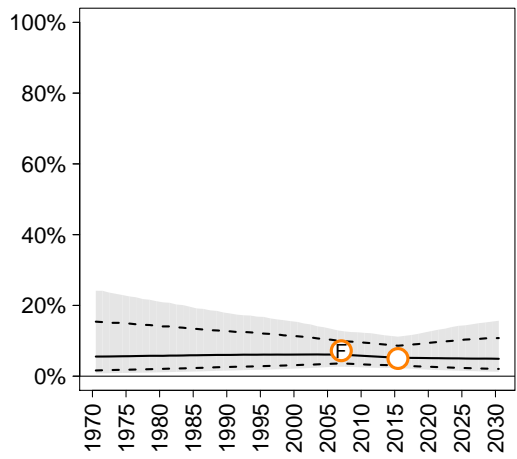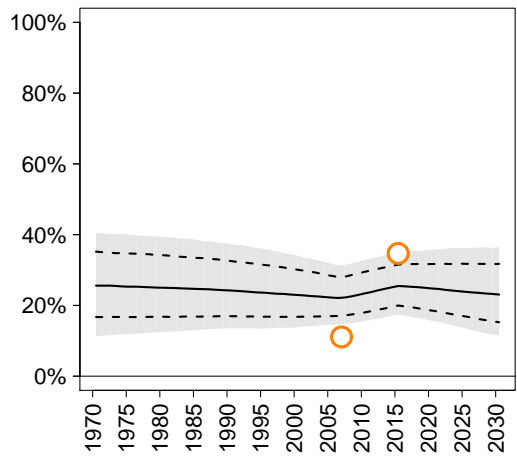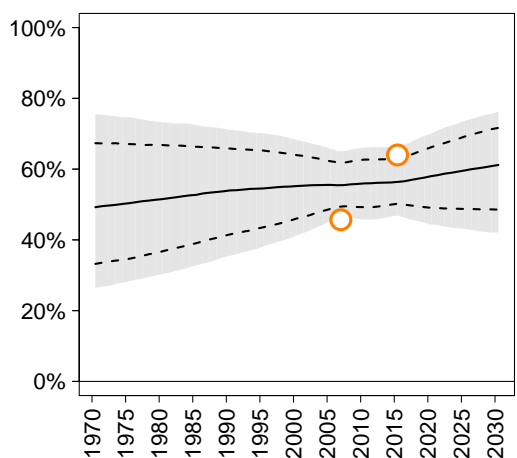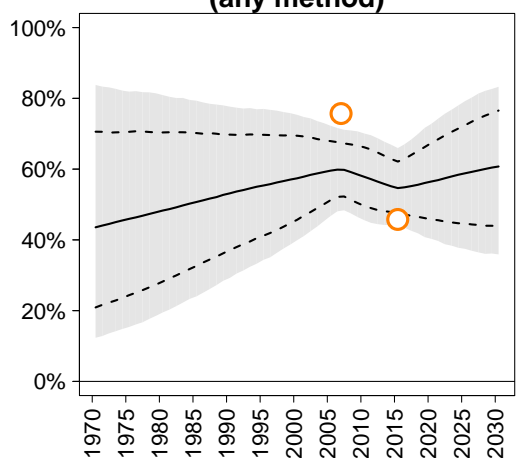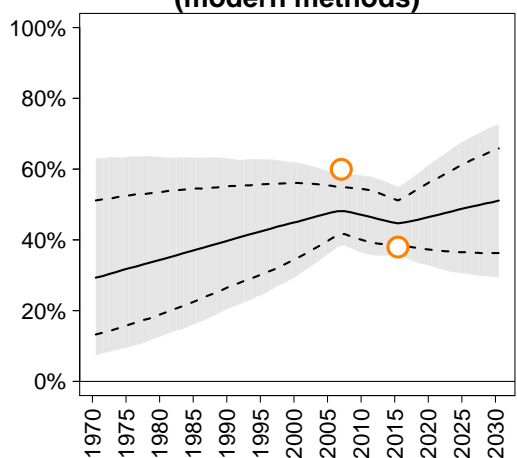

Somalia (Eastern Africa) --- Married / In-Union

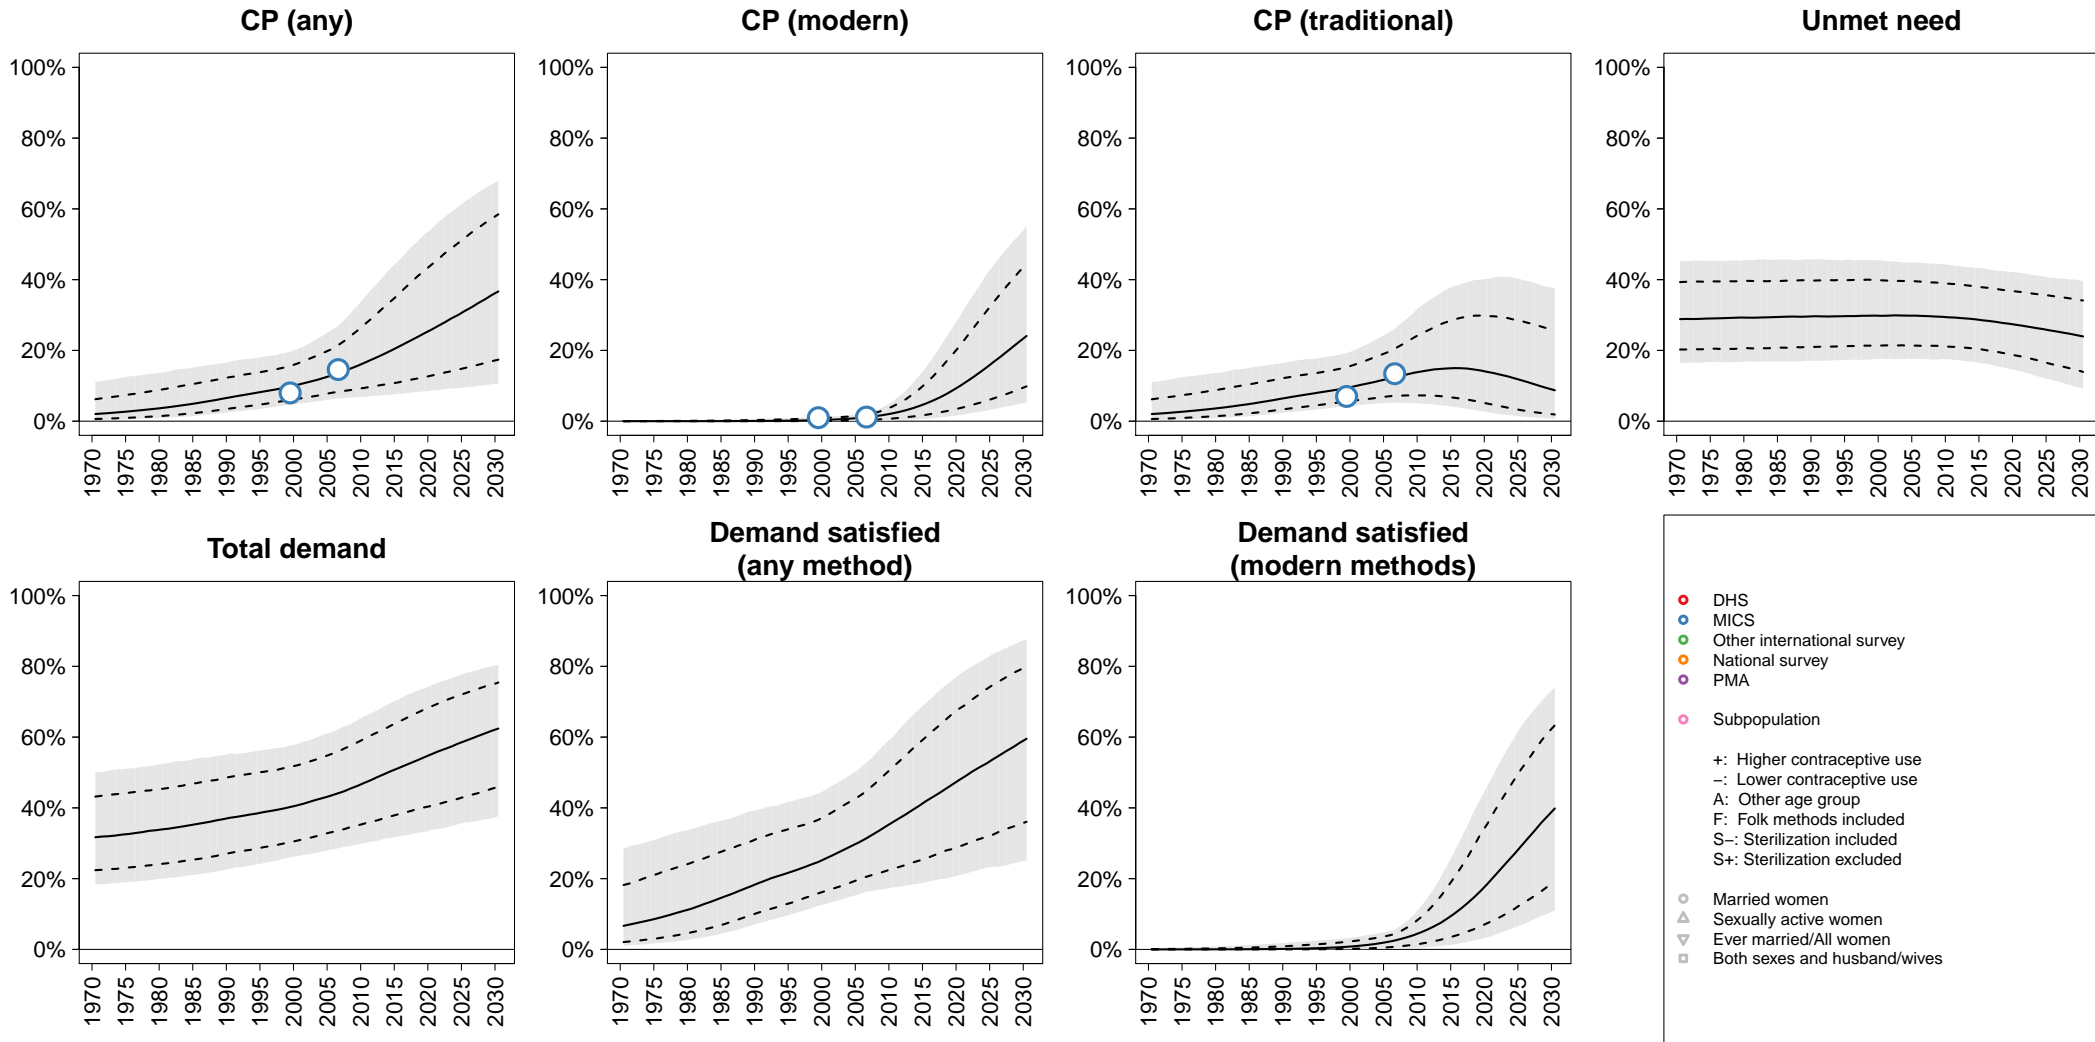

South Africa (Southern Africa) --- Married / In-Union

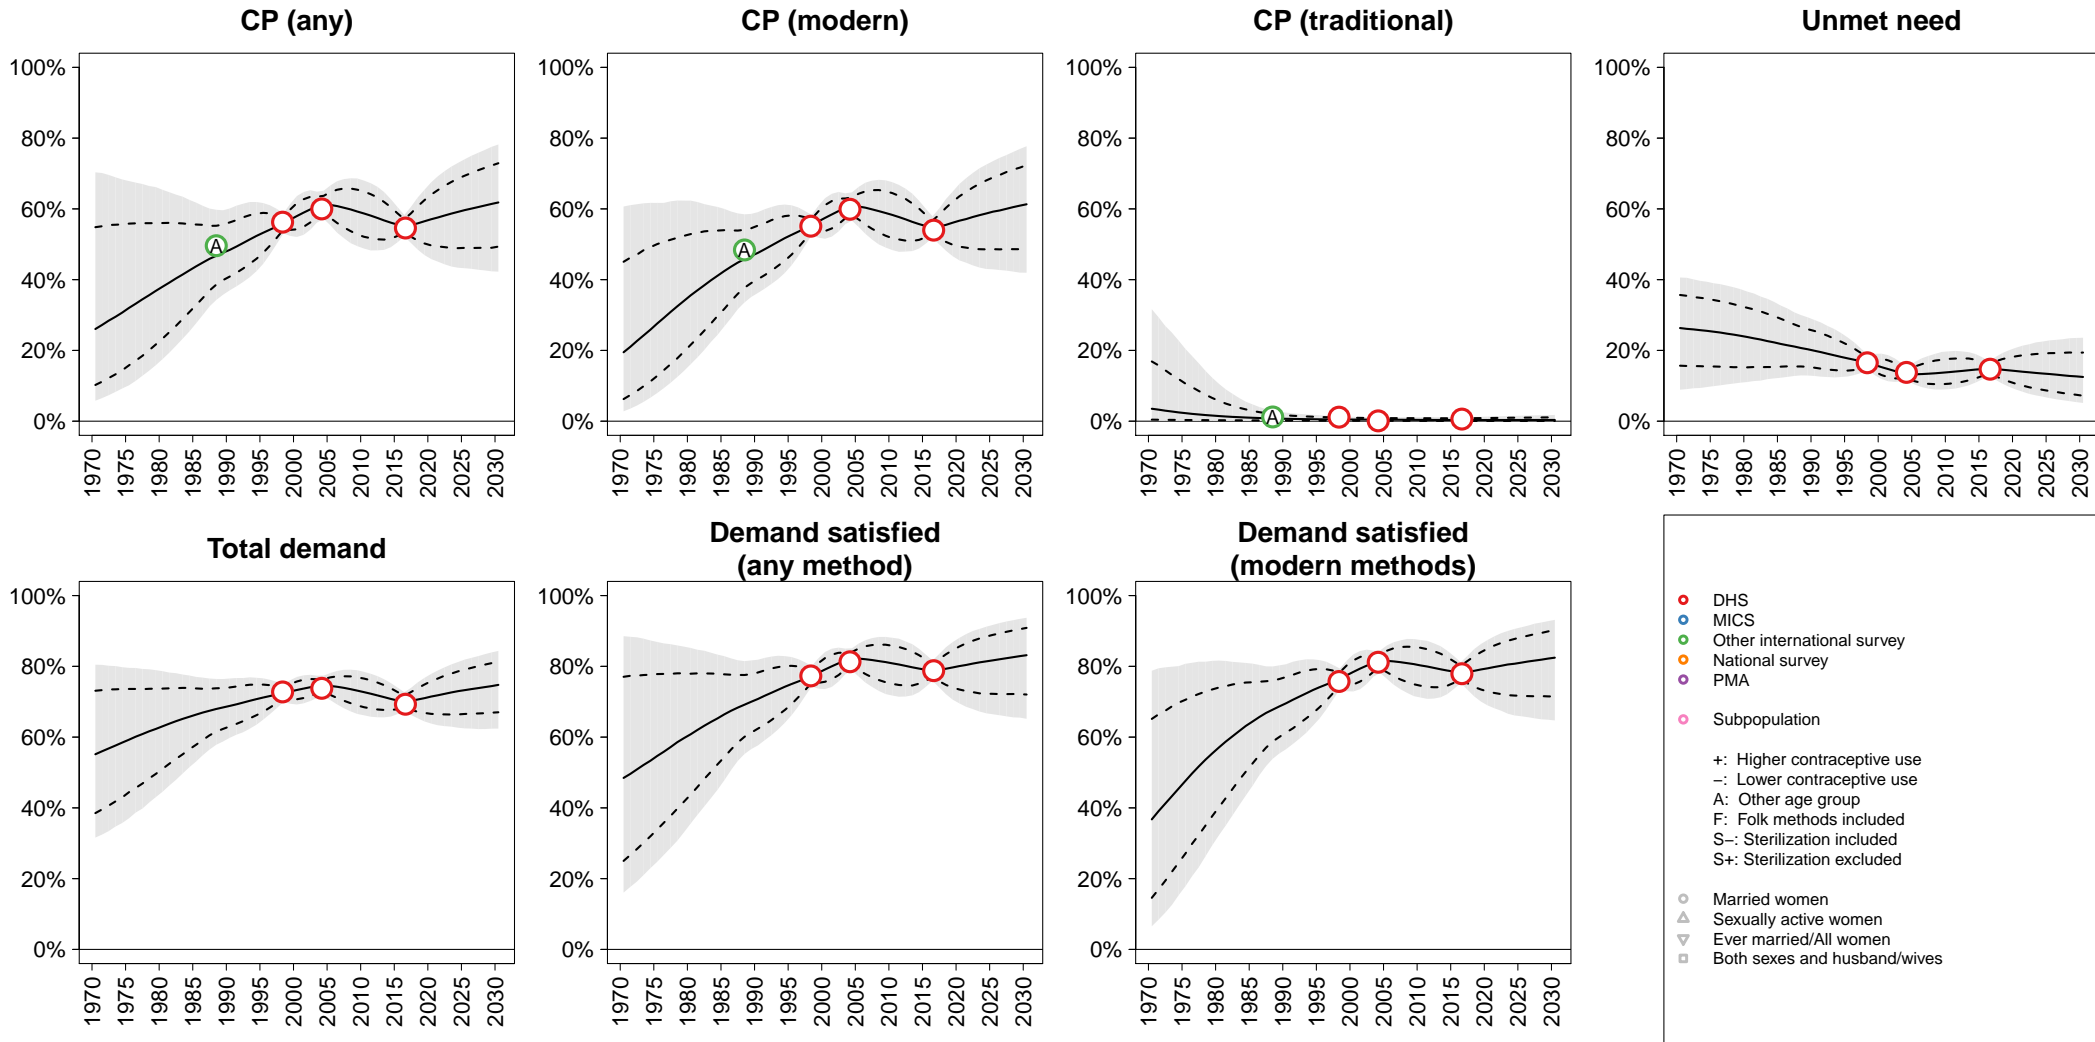

South Sudan (Eastern Africa) --- Married / In-Union

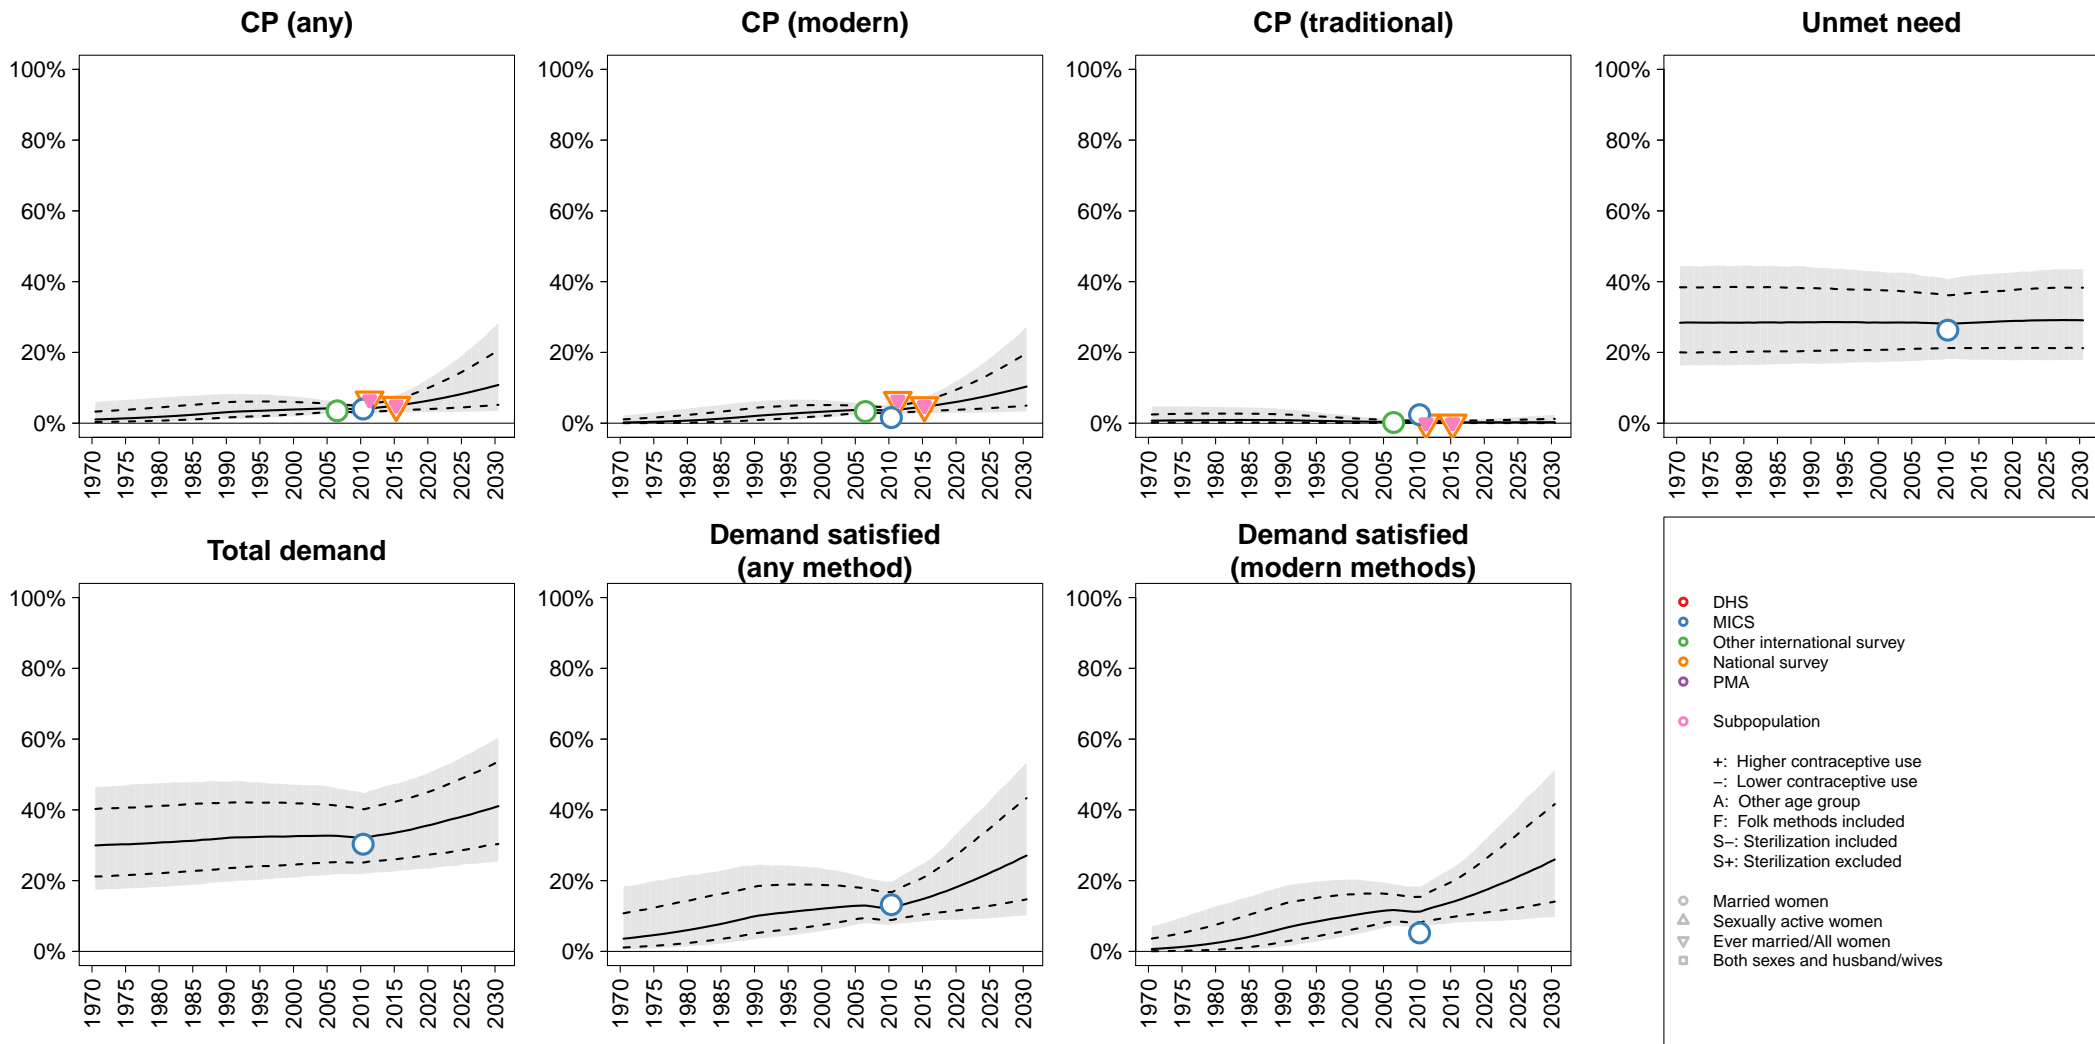

Spain (Southern Europe) --- Married / In-Union

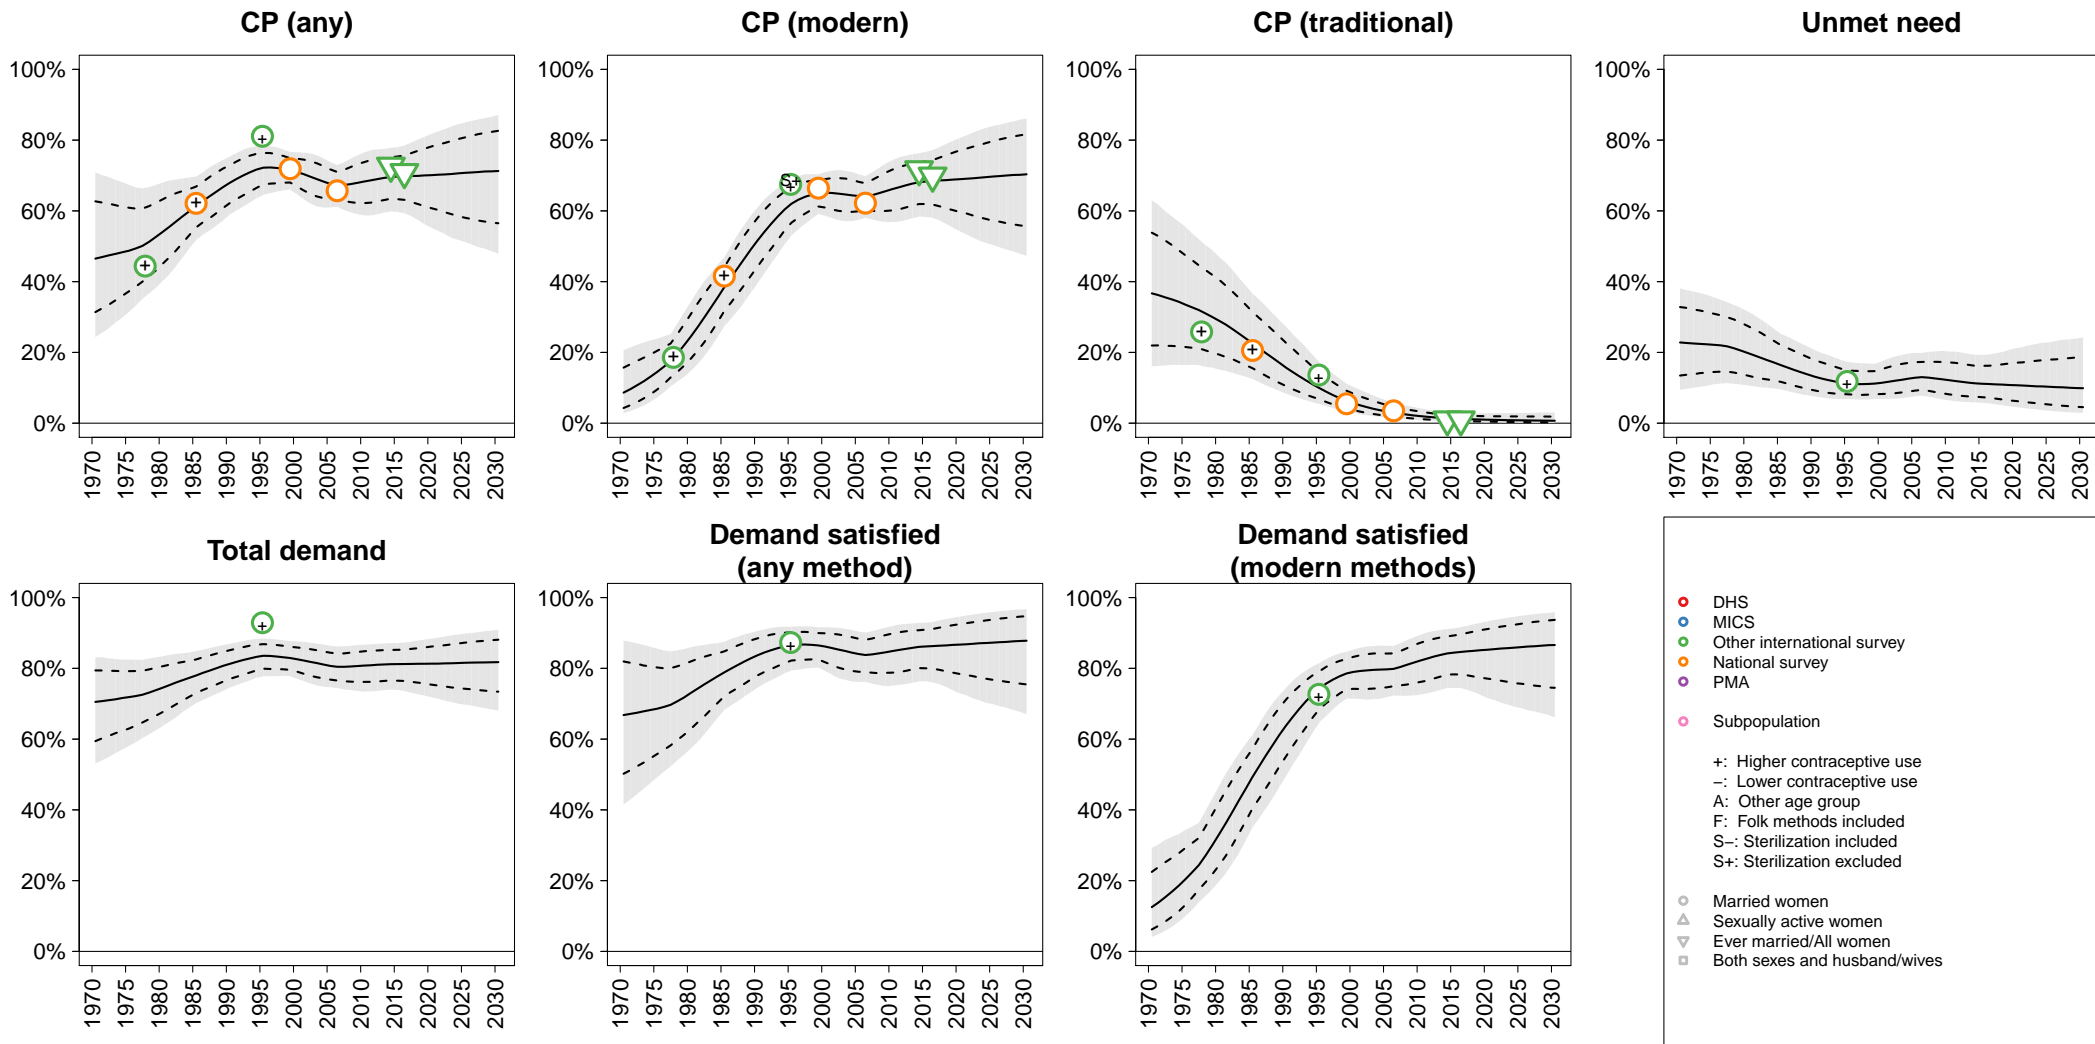

Sri Lanka (Southern Asia) --- Married / In-Union

CP (any)

CP (modern)

CP (traditional)

Unmet need

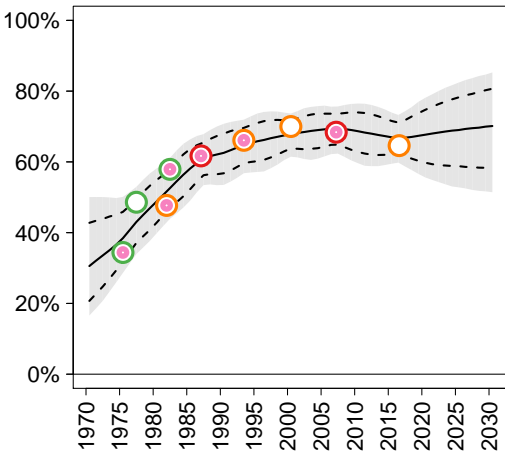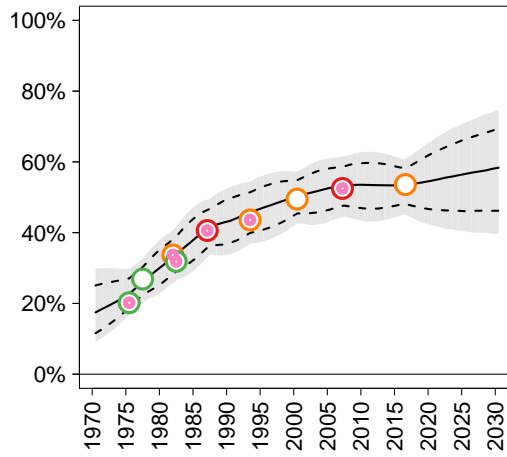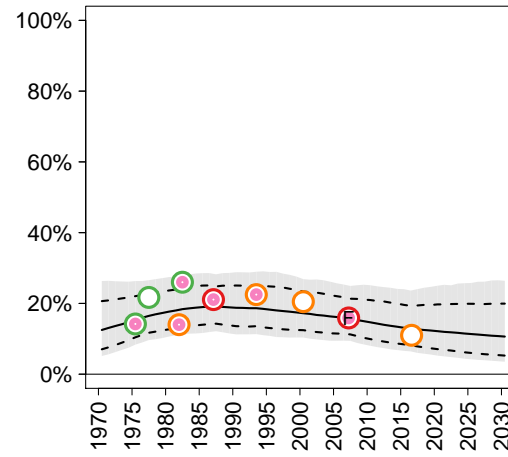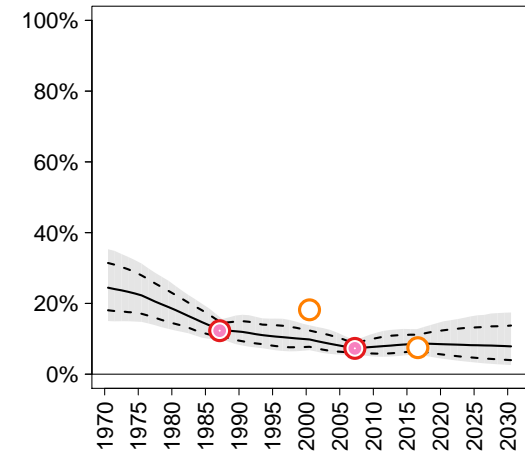

Total demand

Demand satisfied (any method)

Demand satisfied (modern methods)

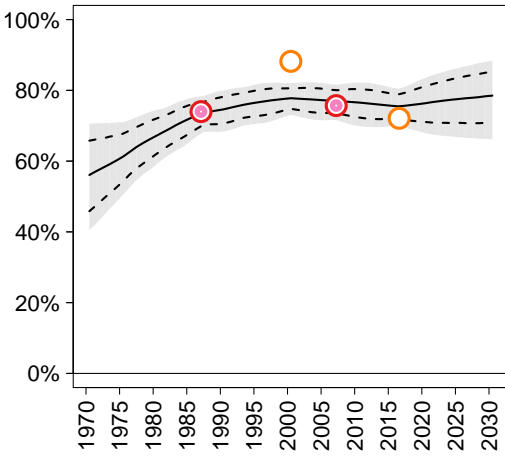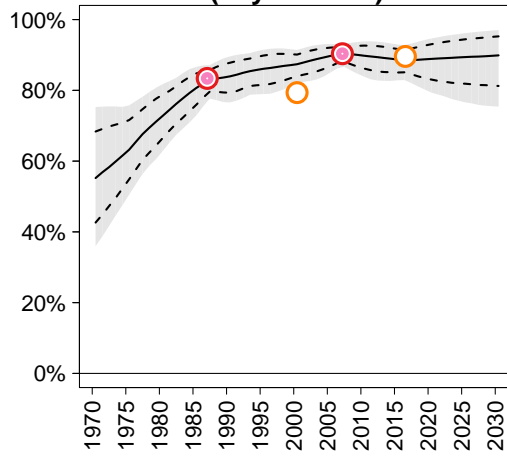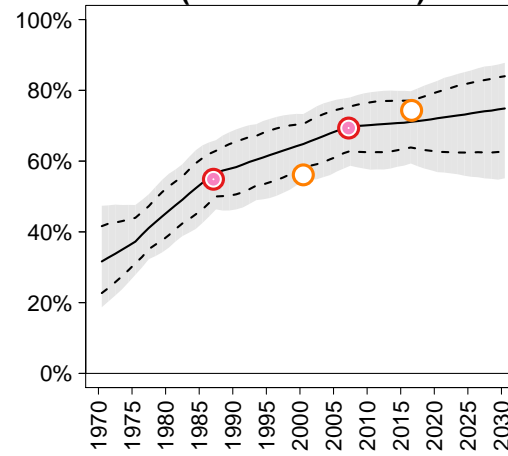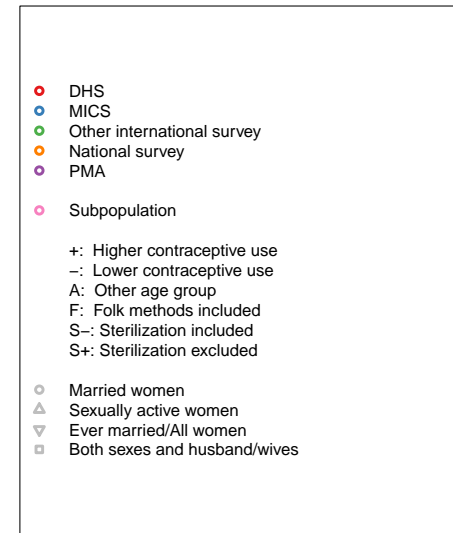



St. Lucia (Caribbean) --- Married / In-Union

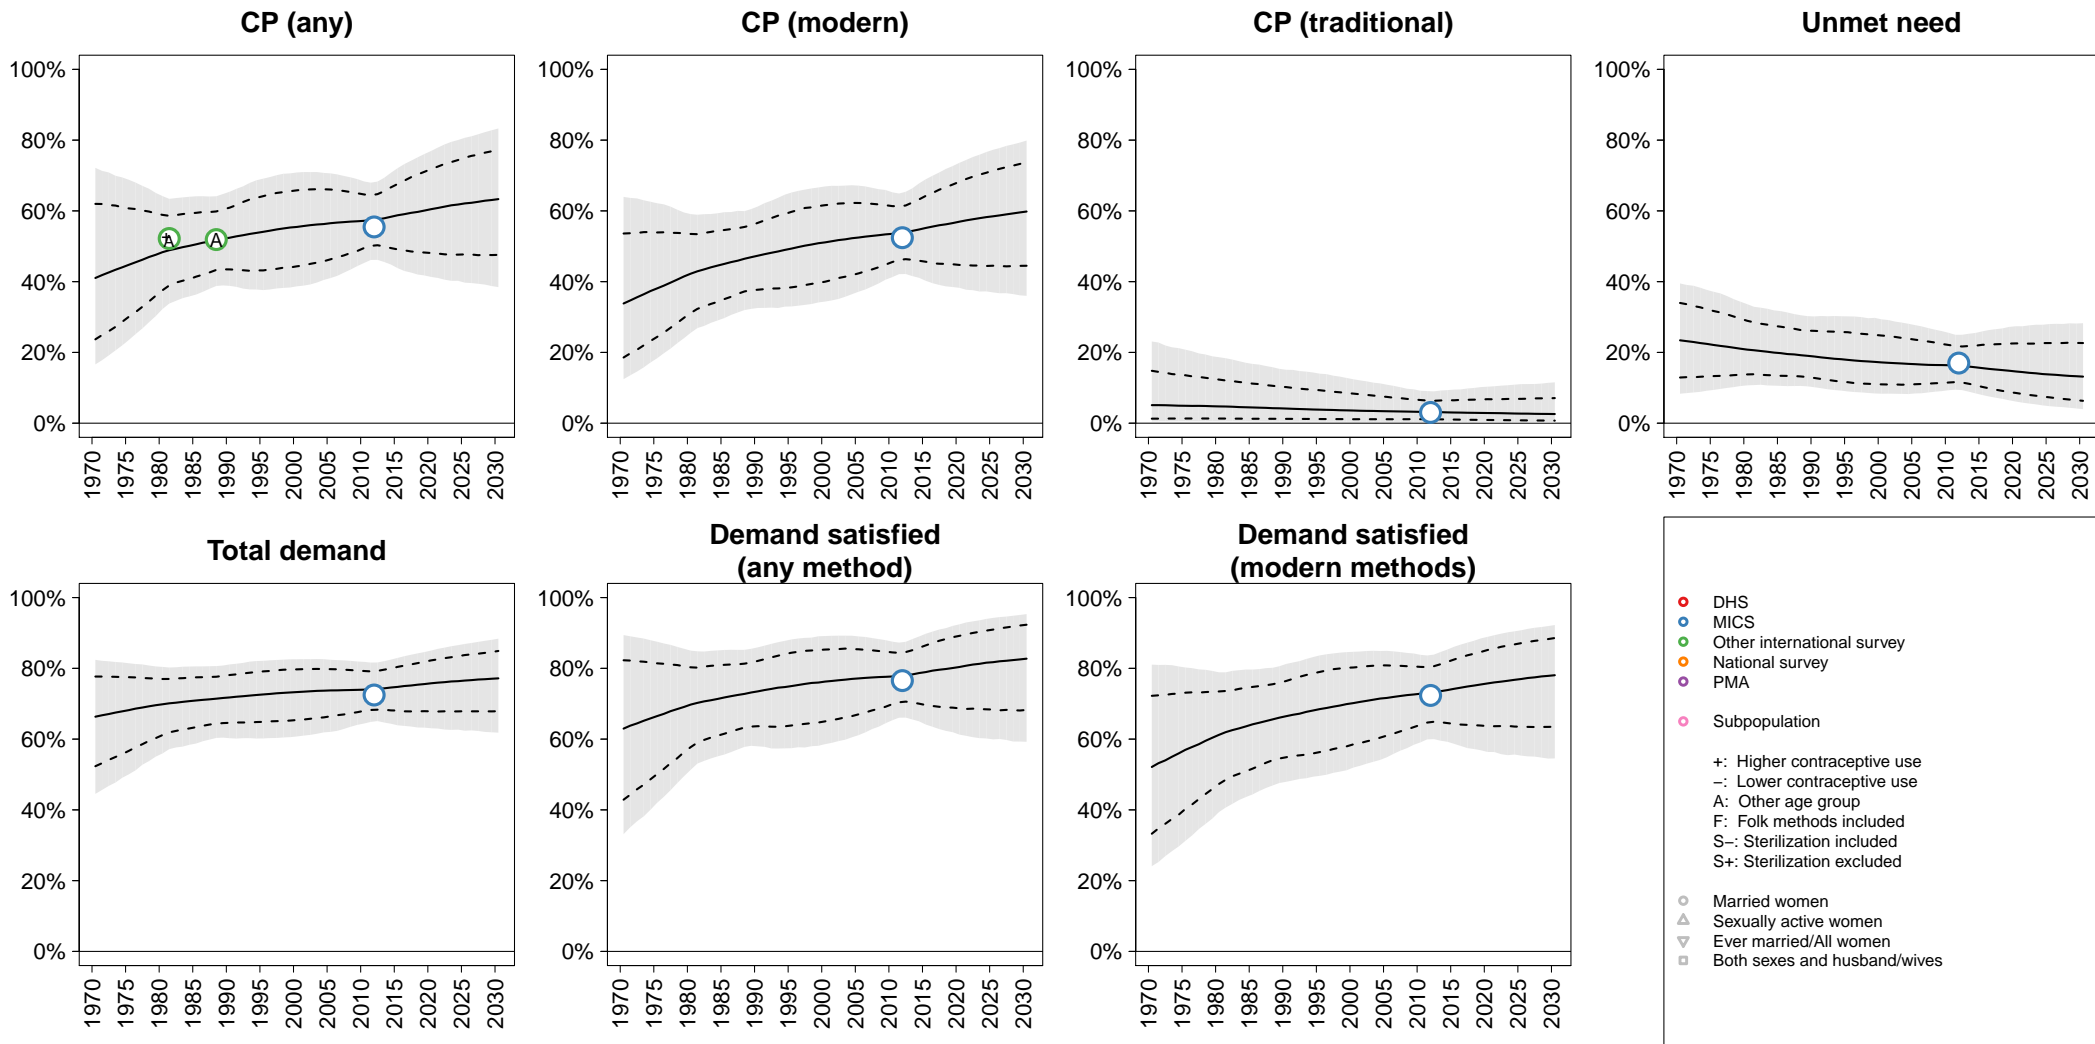

St. Vincent and the Grenadines (Caribbean) --- Married / In-Union

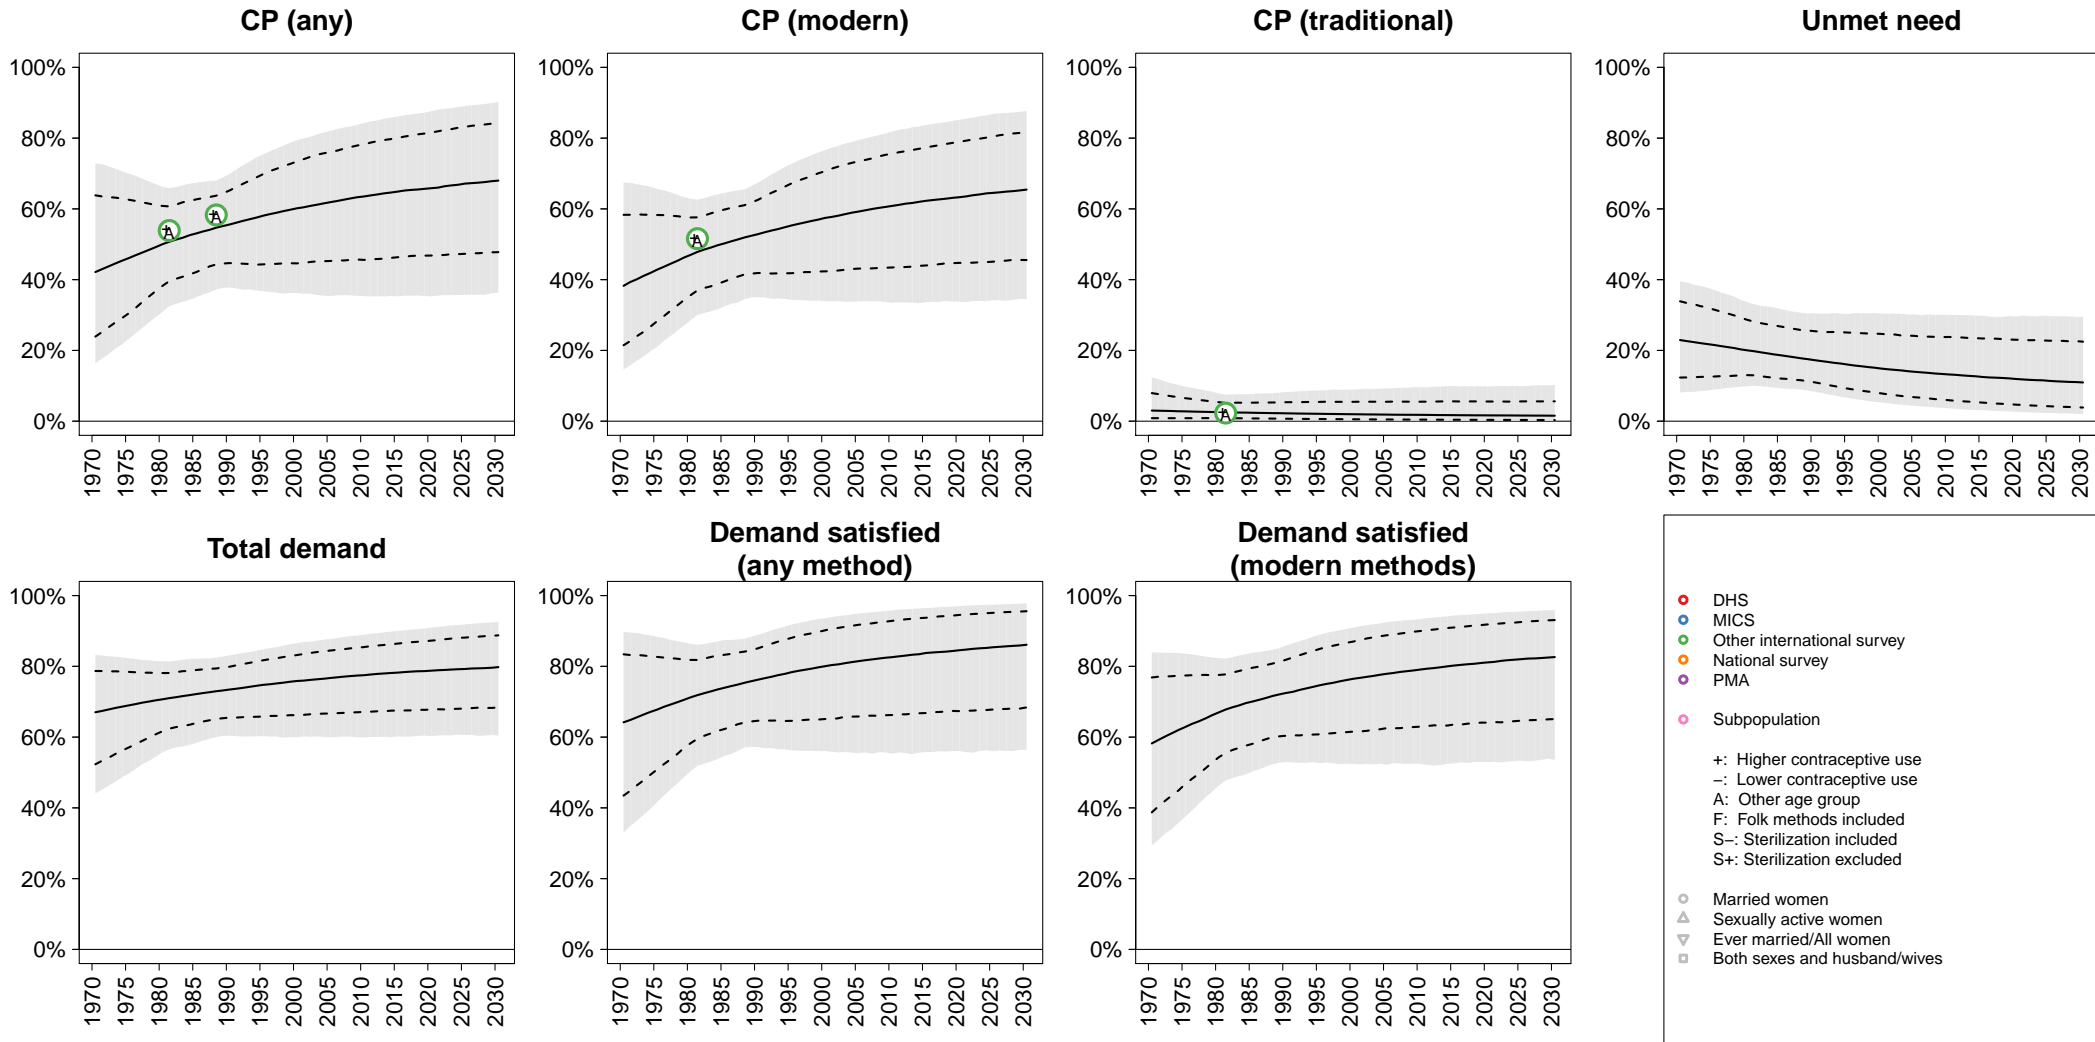

State of Palestine (Western Asia) --- Married / In-Union

CP (any)

CP (modern)

CP (traditional)

Unmet need

Total demand

Demand satisfied (any method)

Demand satisfied (modern methods)

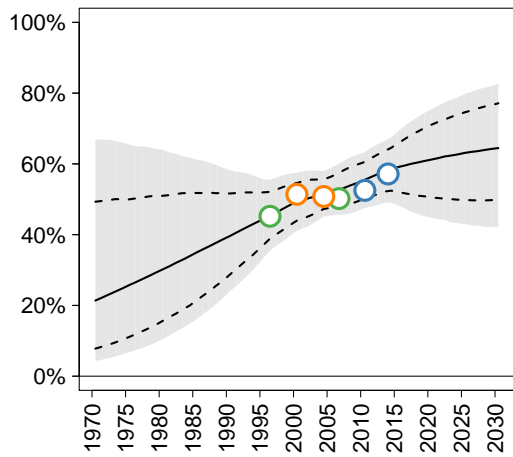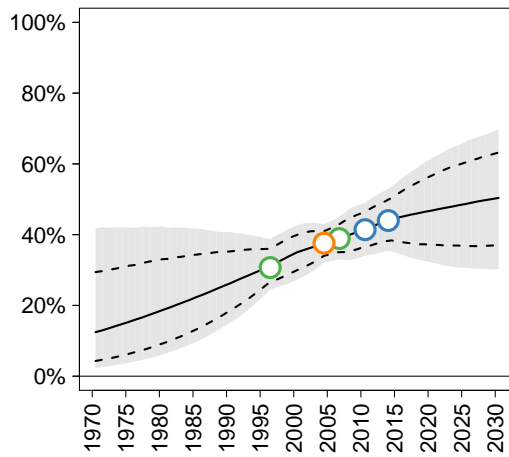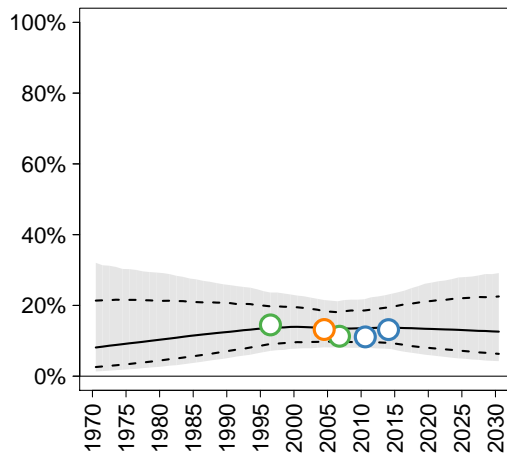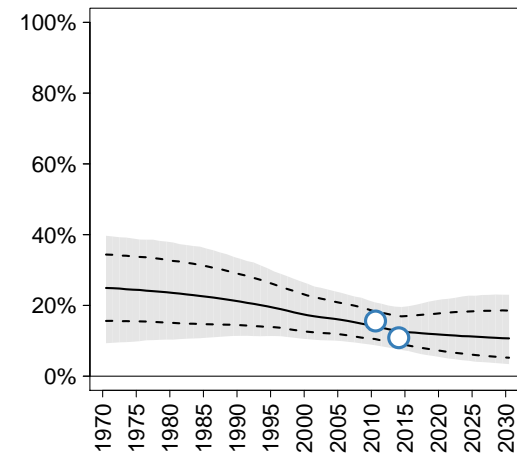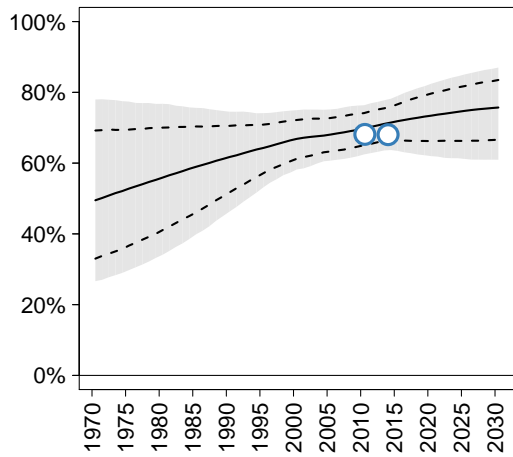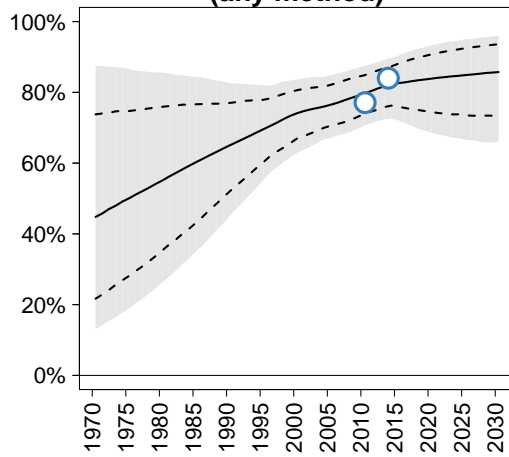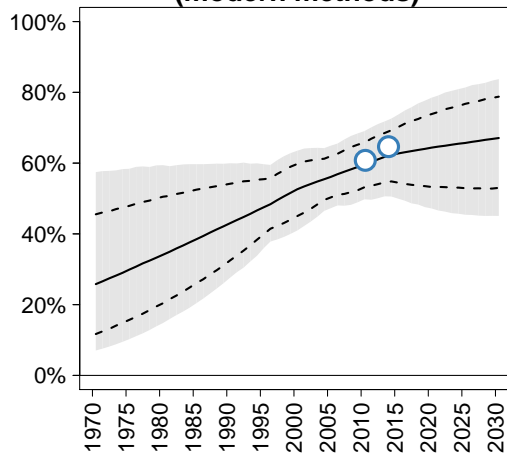

Sudan (Northern Africa) --- Married / In-Union

CP (any)

CP (modern)

CP (traditional)

Unmet need

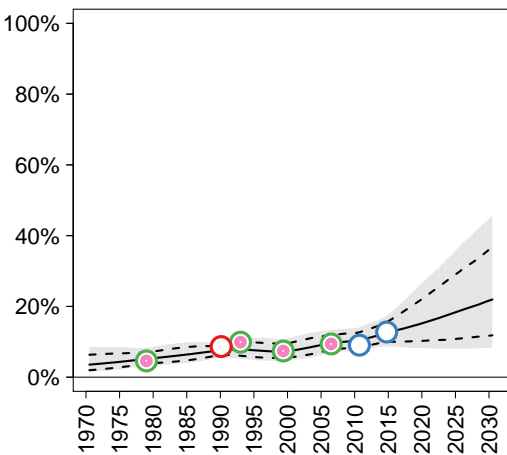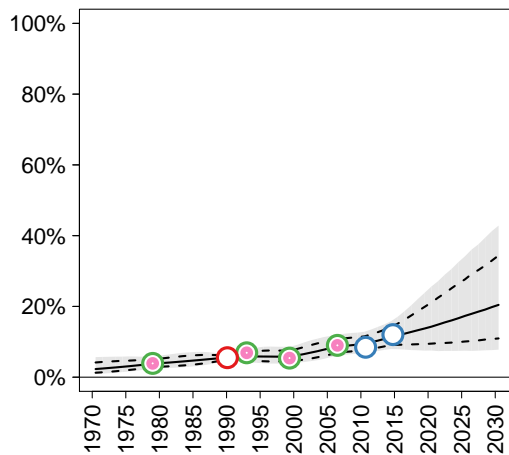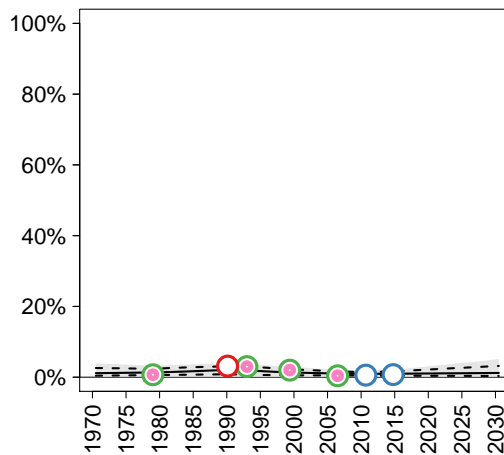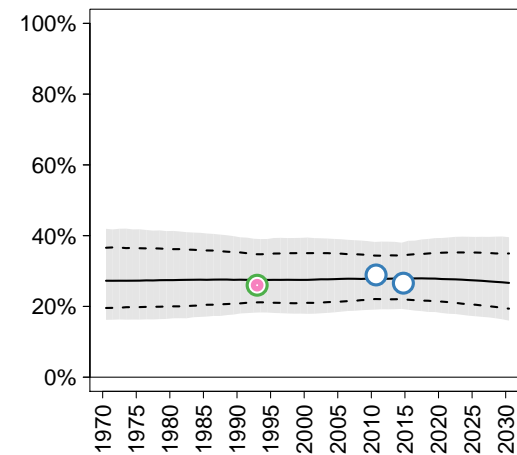

Total demand

Demand satisfied (any method)

Demand satisfied (modern methods)

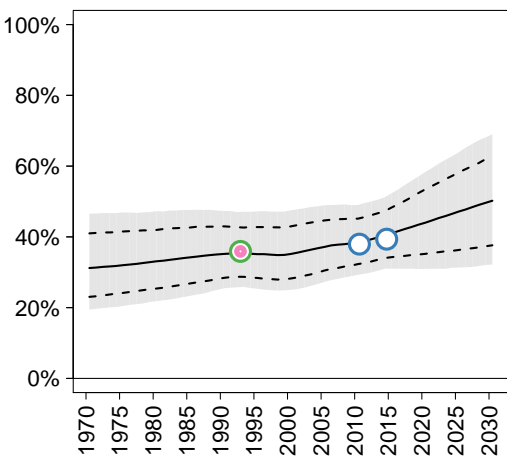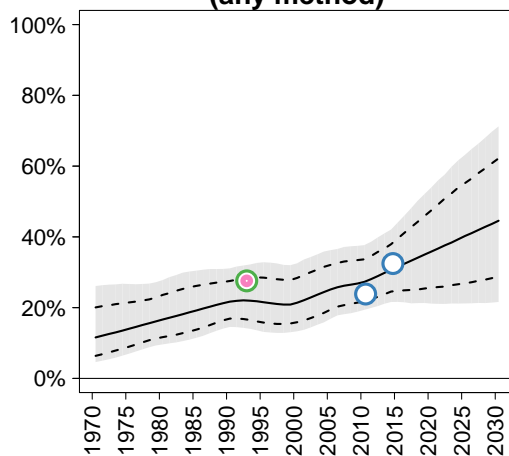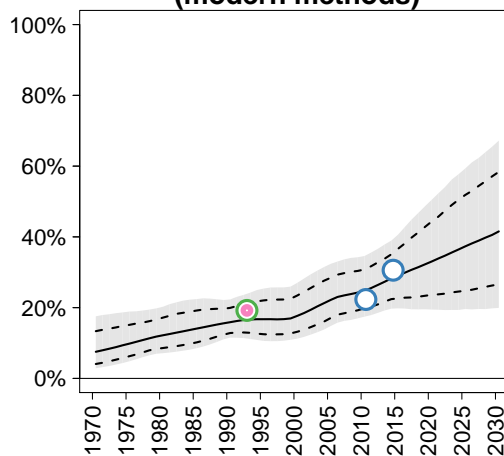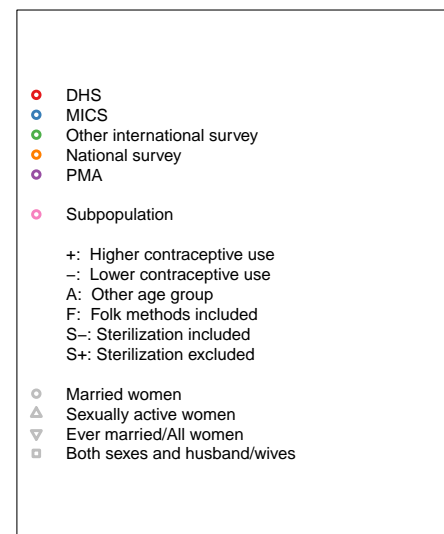

Suriname (South America) --- Married / In-Union

CP (any)

CP (modern)

CP (traditional)

Unmet need

Total demand

Demand satisfied (any method)

Demand satisfied (modern methods)

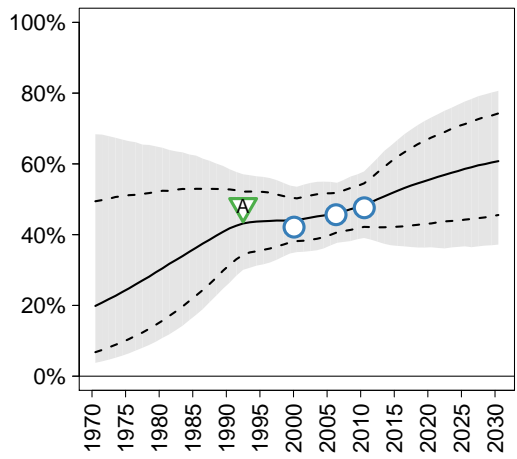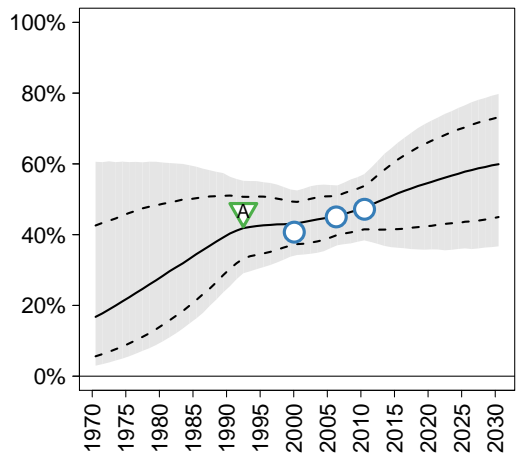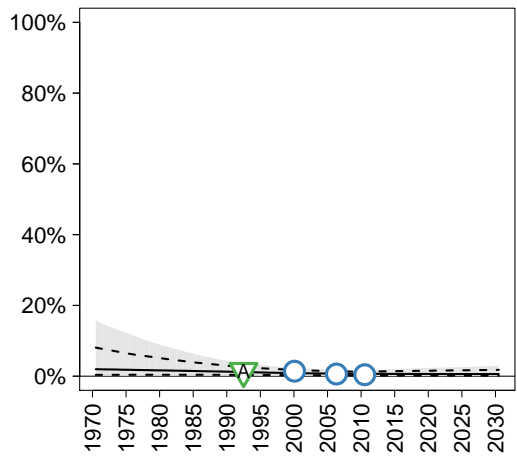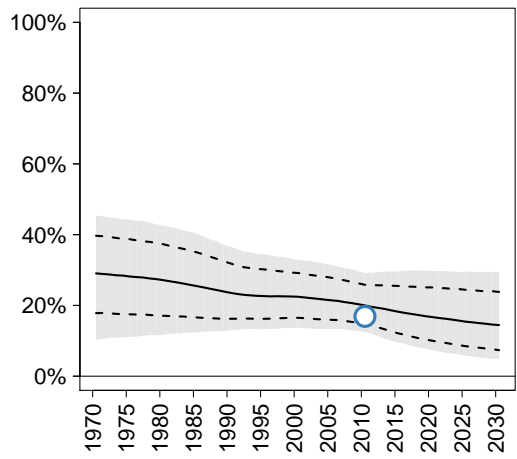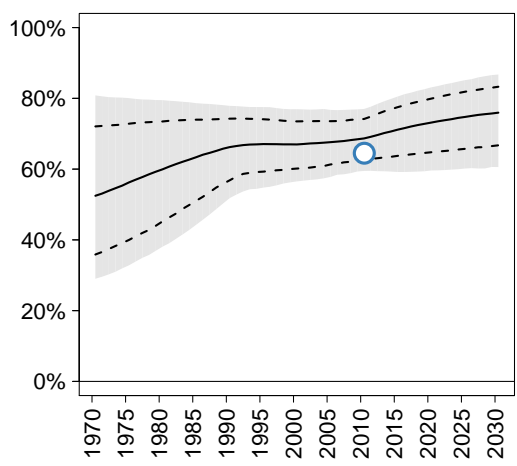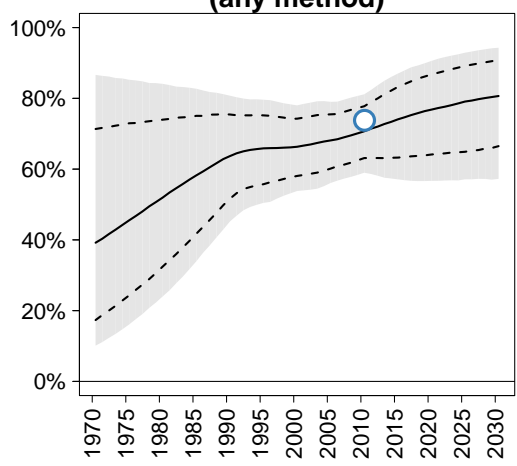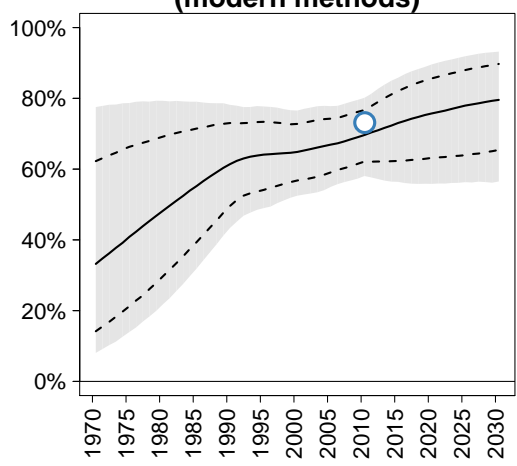

Sweden (Northern Europe) --- Married / In-Union

CP (any)

CP (modern)

CP (traditional)

Unmet need

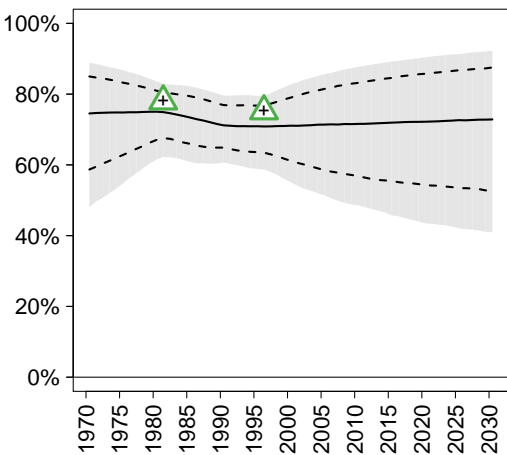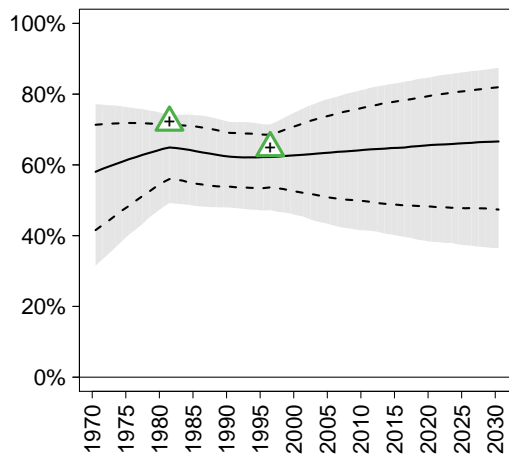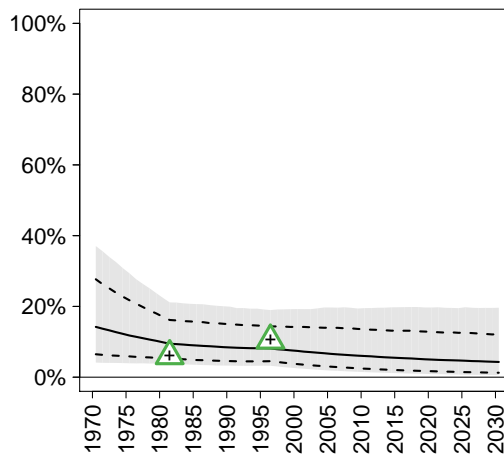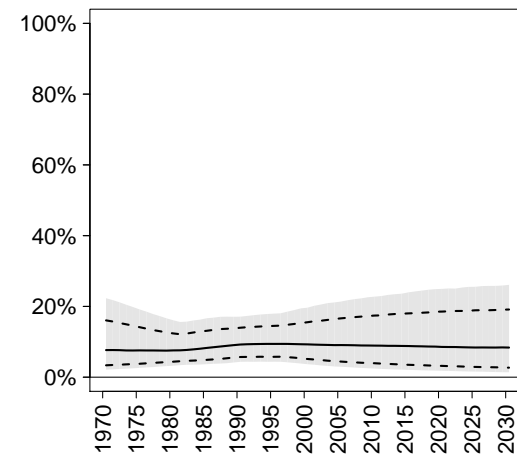

Total demand

Demand satisfied (any method)

Demand satisfied (modern methods)

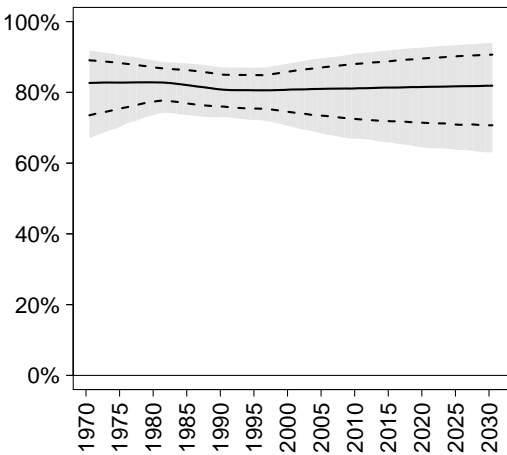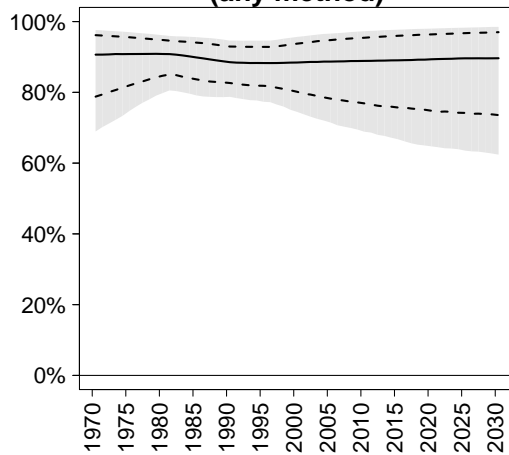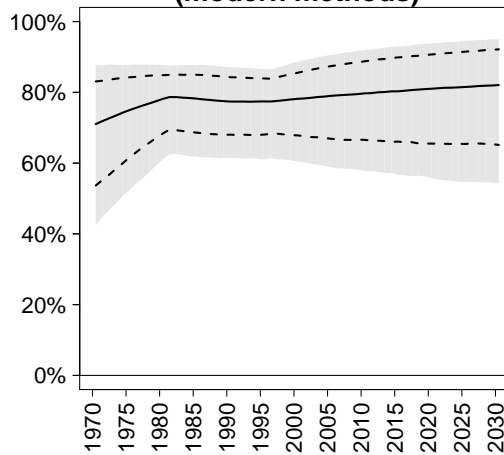

- DHS
- MICS
- Other international survey
- National survey
- PMA
- Subpopulation
- + : Higher contraceptive use
- : Lower contraceptive use
- A : Other age group
- F : Folk methods included
- S- : Sterilization included
- S+ : Sterilization excluded
- Married women
- △ Sexually active women
- ▽ Ever married/All women
- Both sexes and husband/wives

Switzerland (Western Europe) --- Married / In-Union

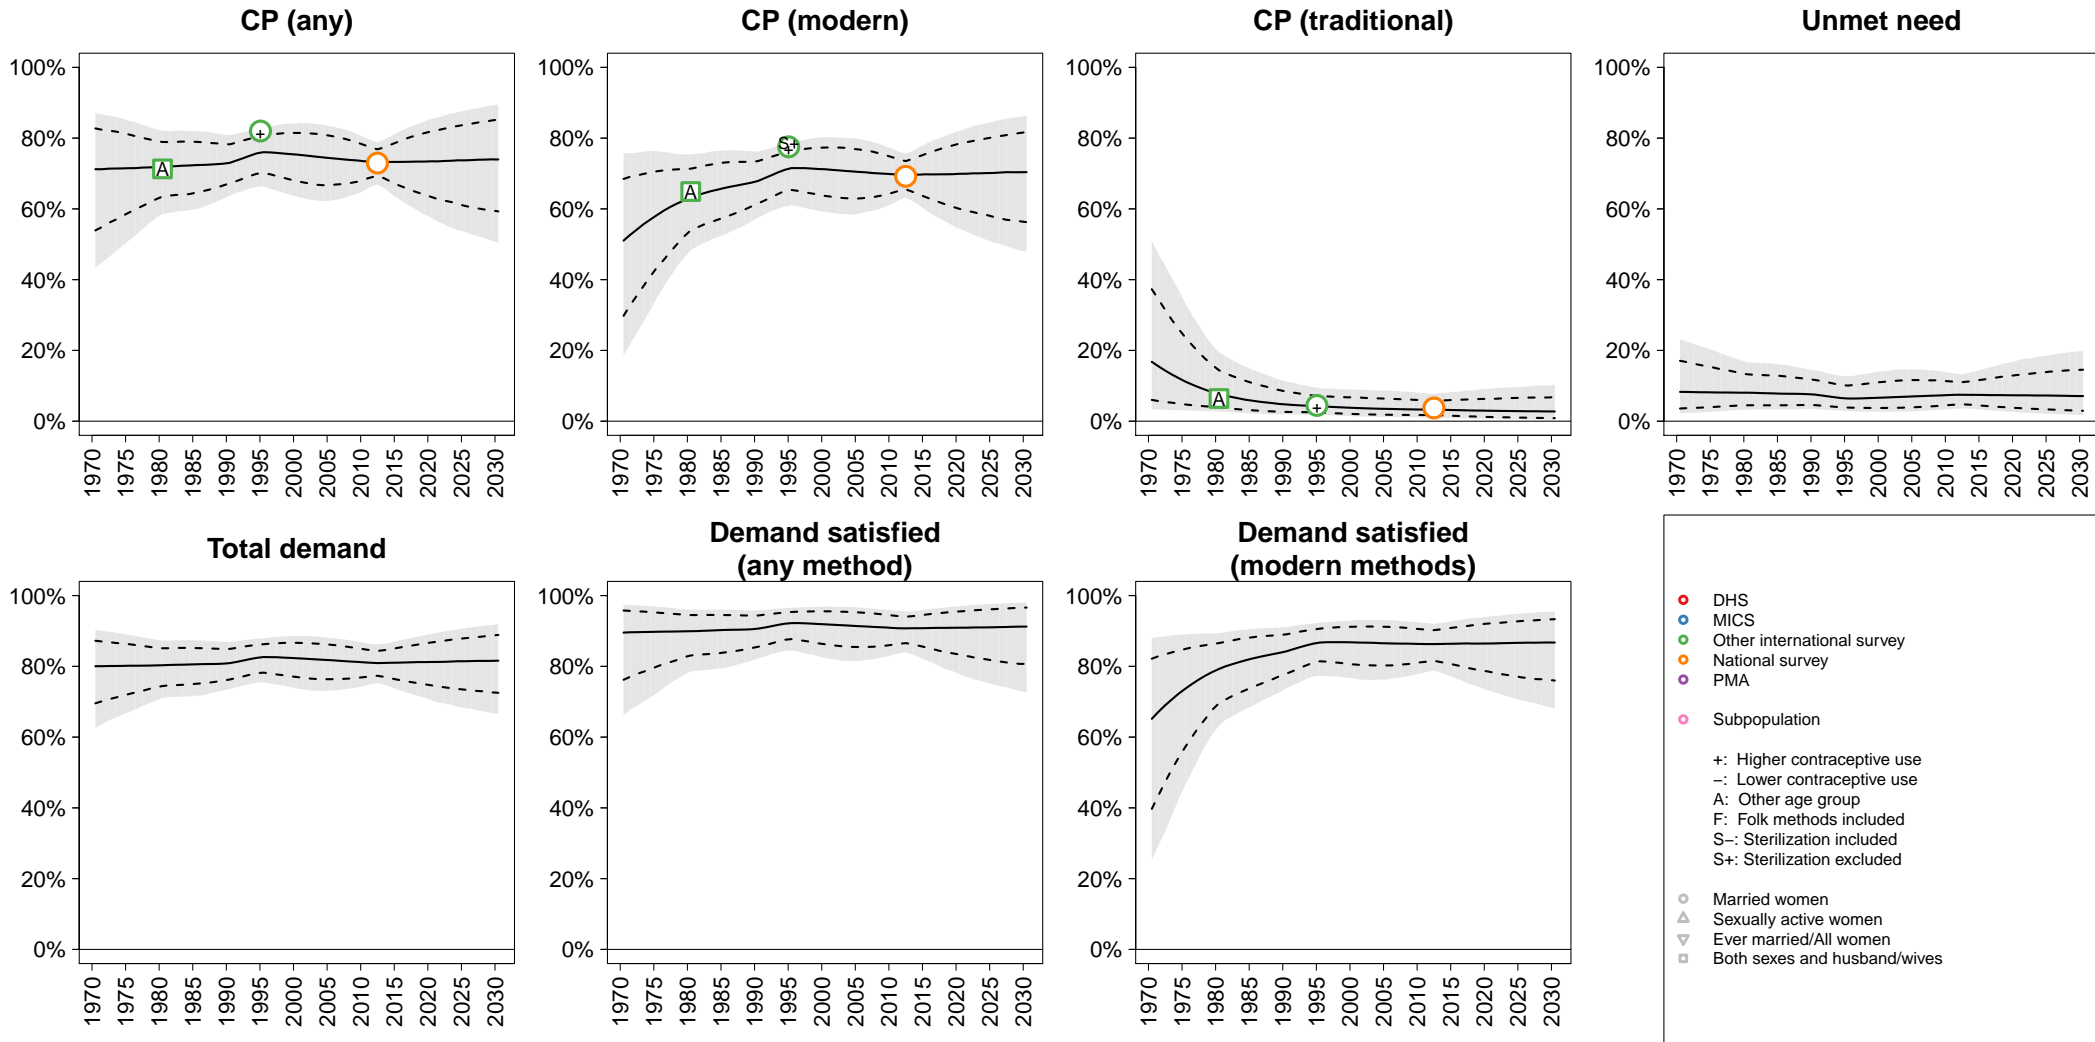

Syrian Arab Republic (Western Asia) --- Married / In-Union

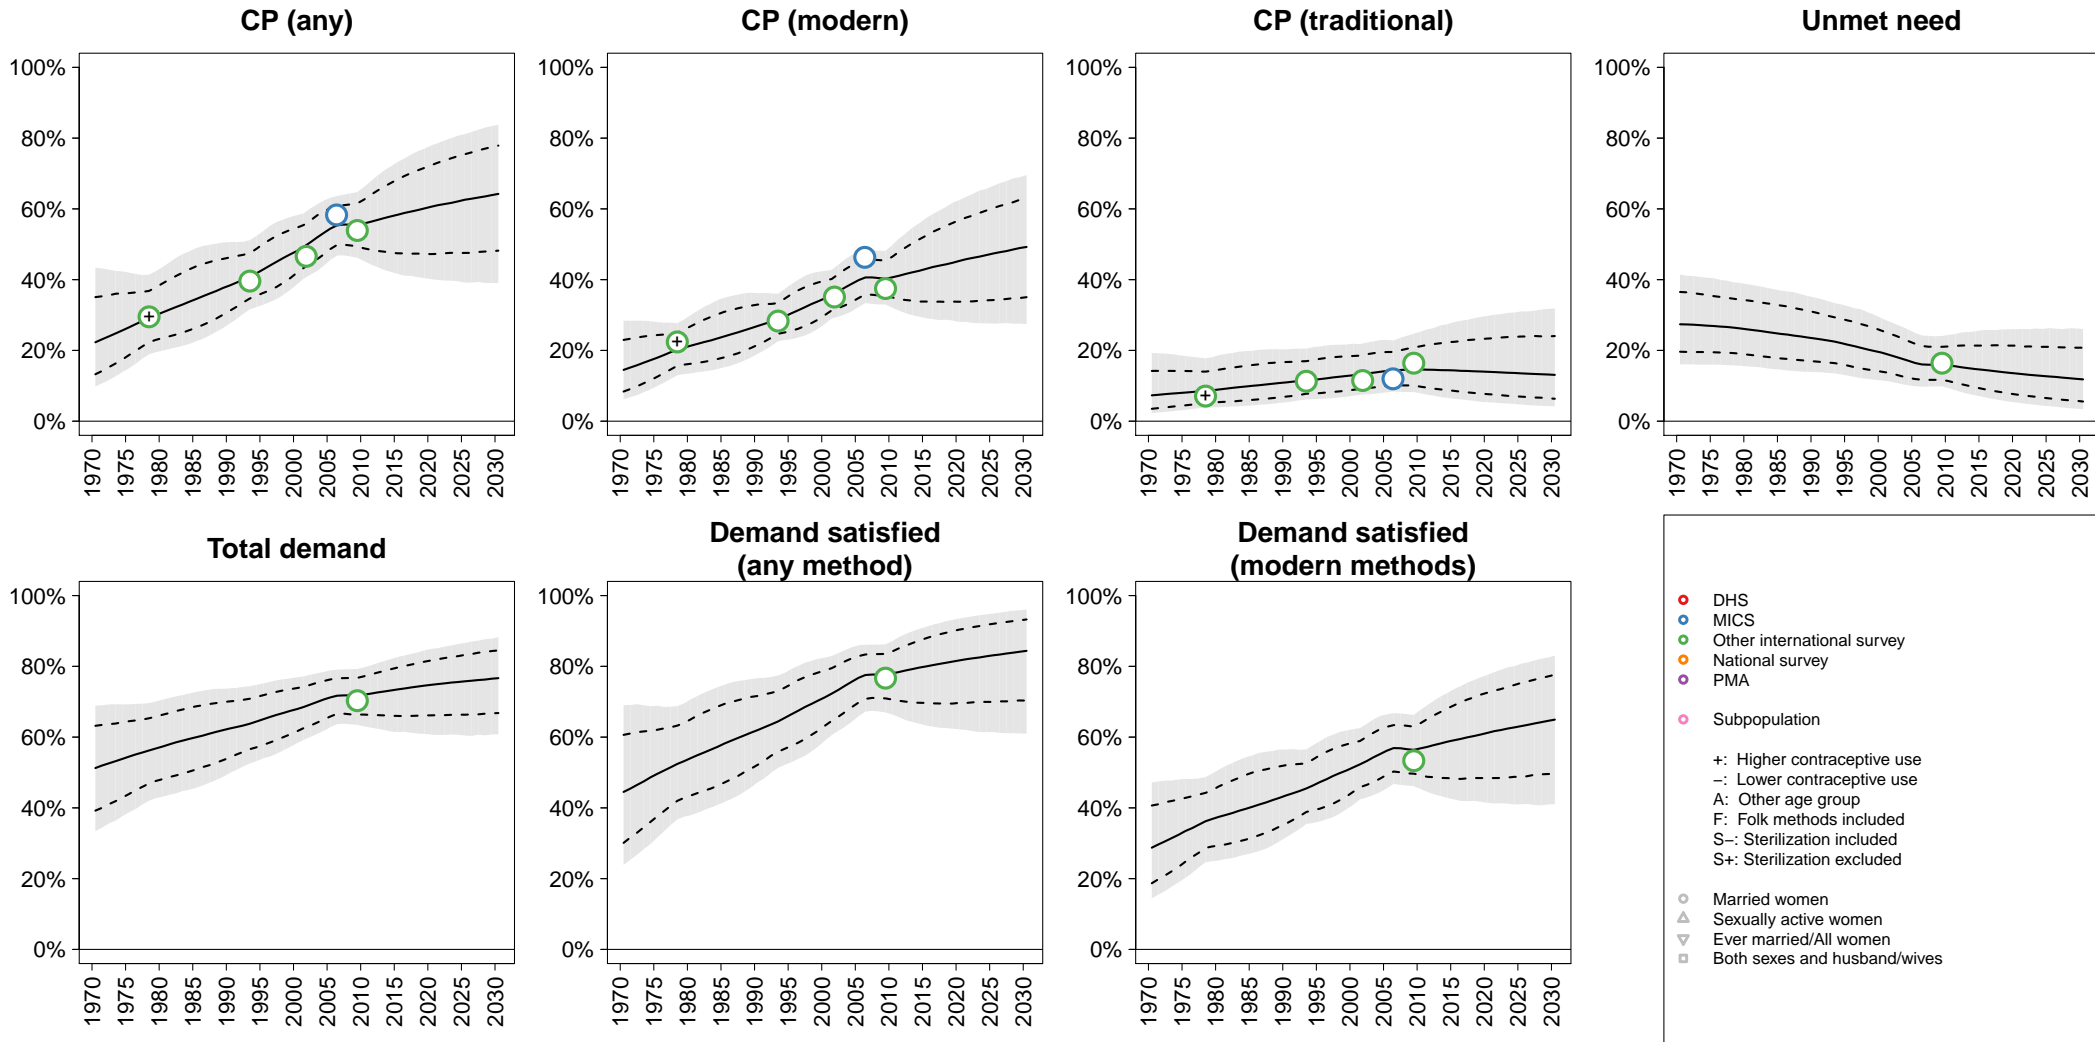



Tajikistan (Central Asia) --- Married / In-Union

CP (any)

CP (modern)

CP (traditional)

Unmet need

Total demand

Demand satisfied (any method)

Demand satisfied (modern methods)

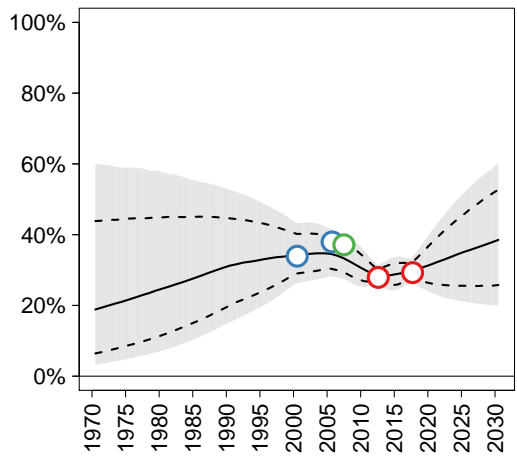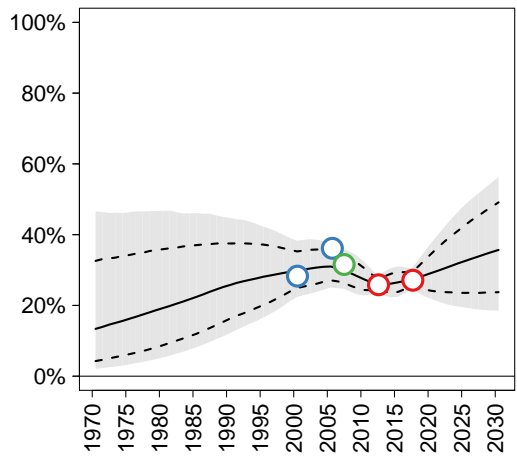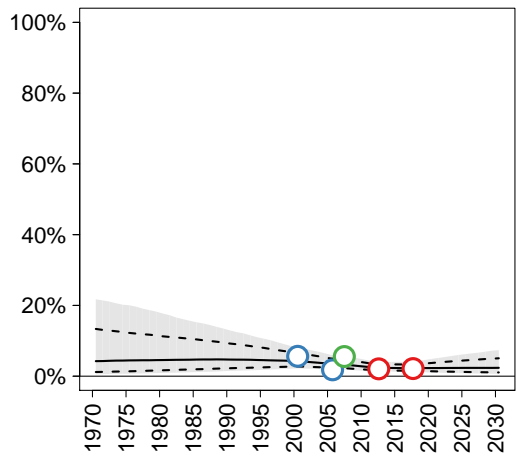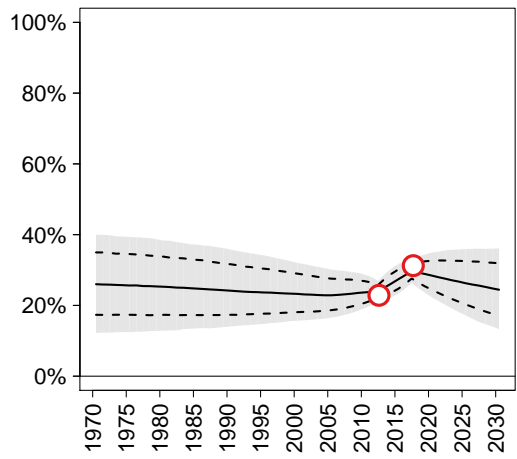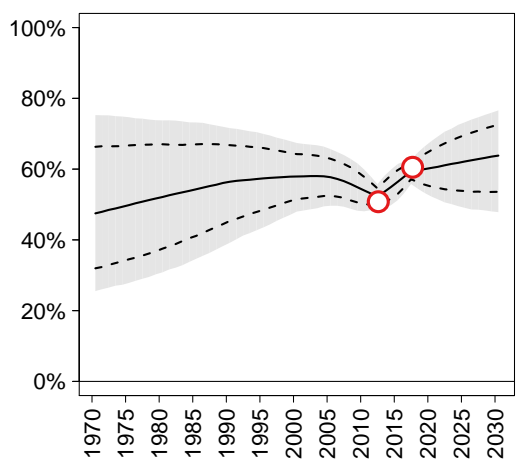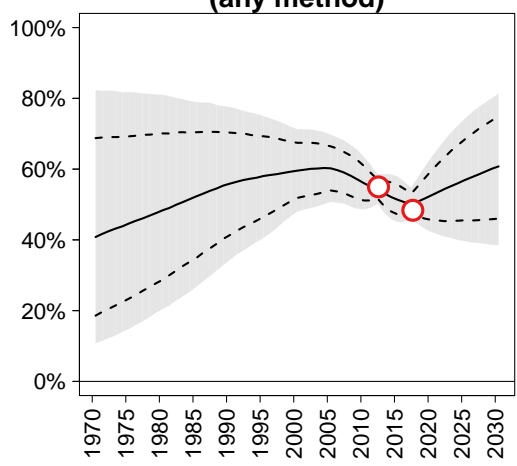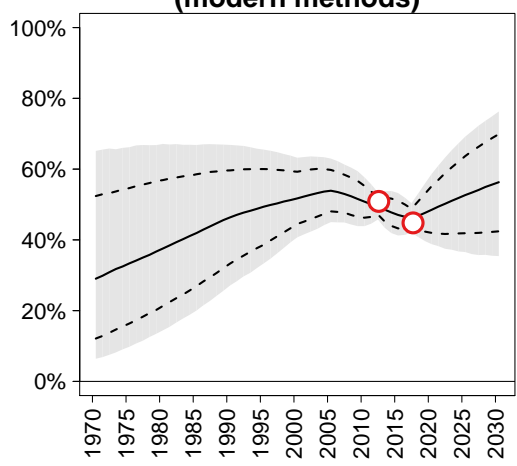

Thailand (South-eastern Asia) --- Married / In-Union

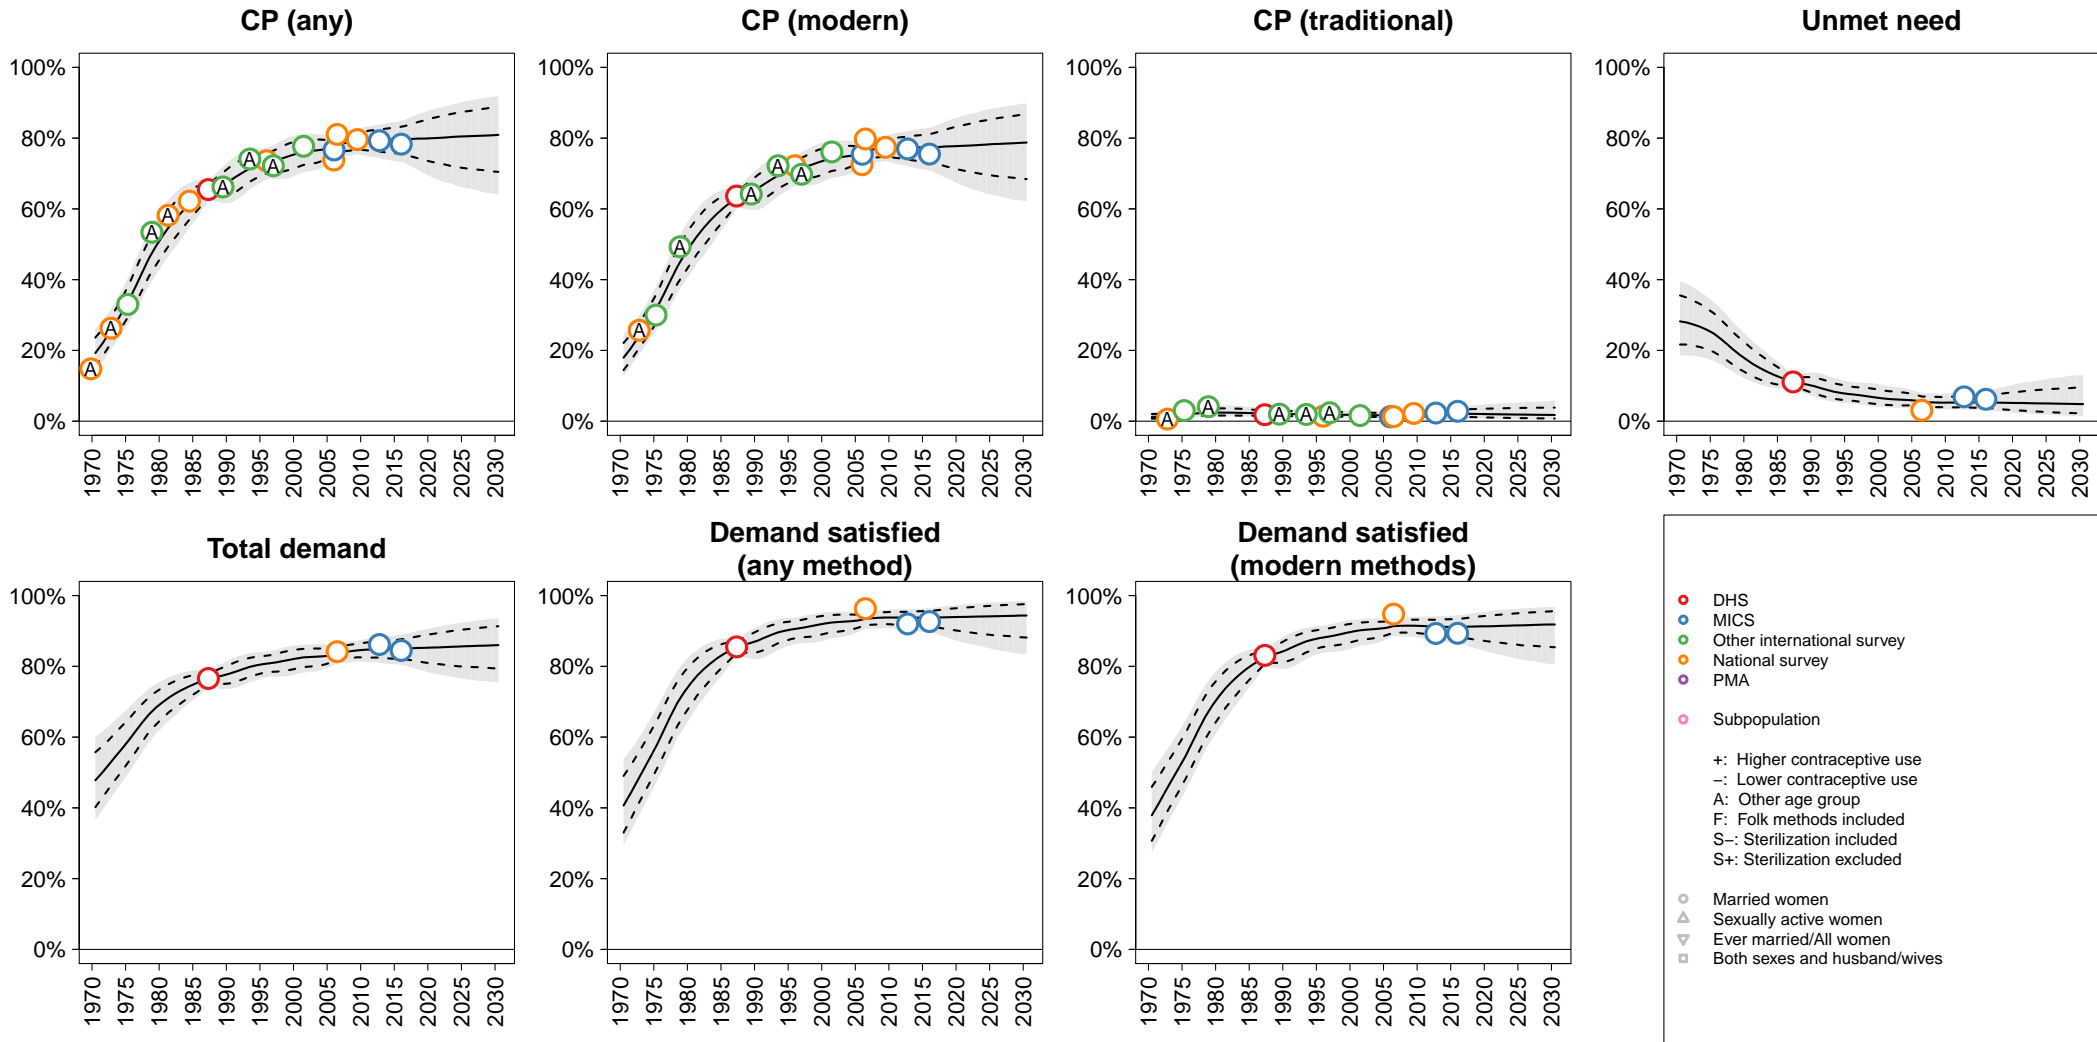

The former Yugoslav Republic of Macedonia (Southern Europe) --- Married / In-Union

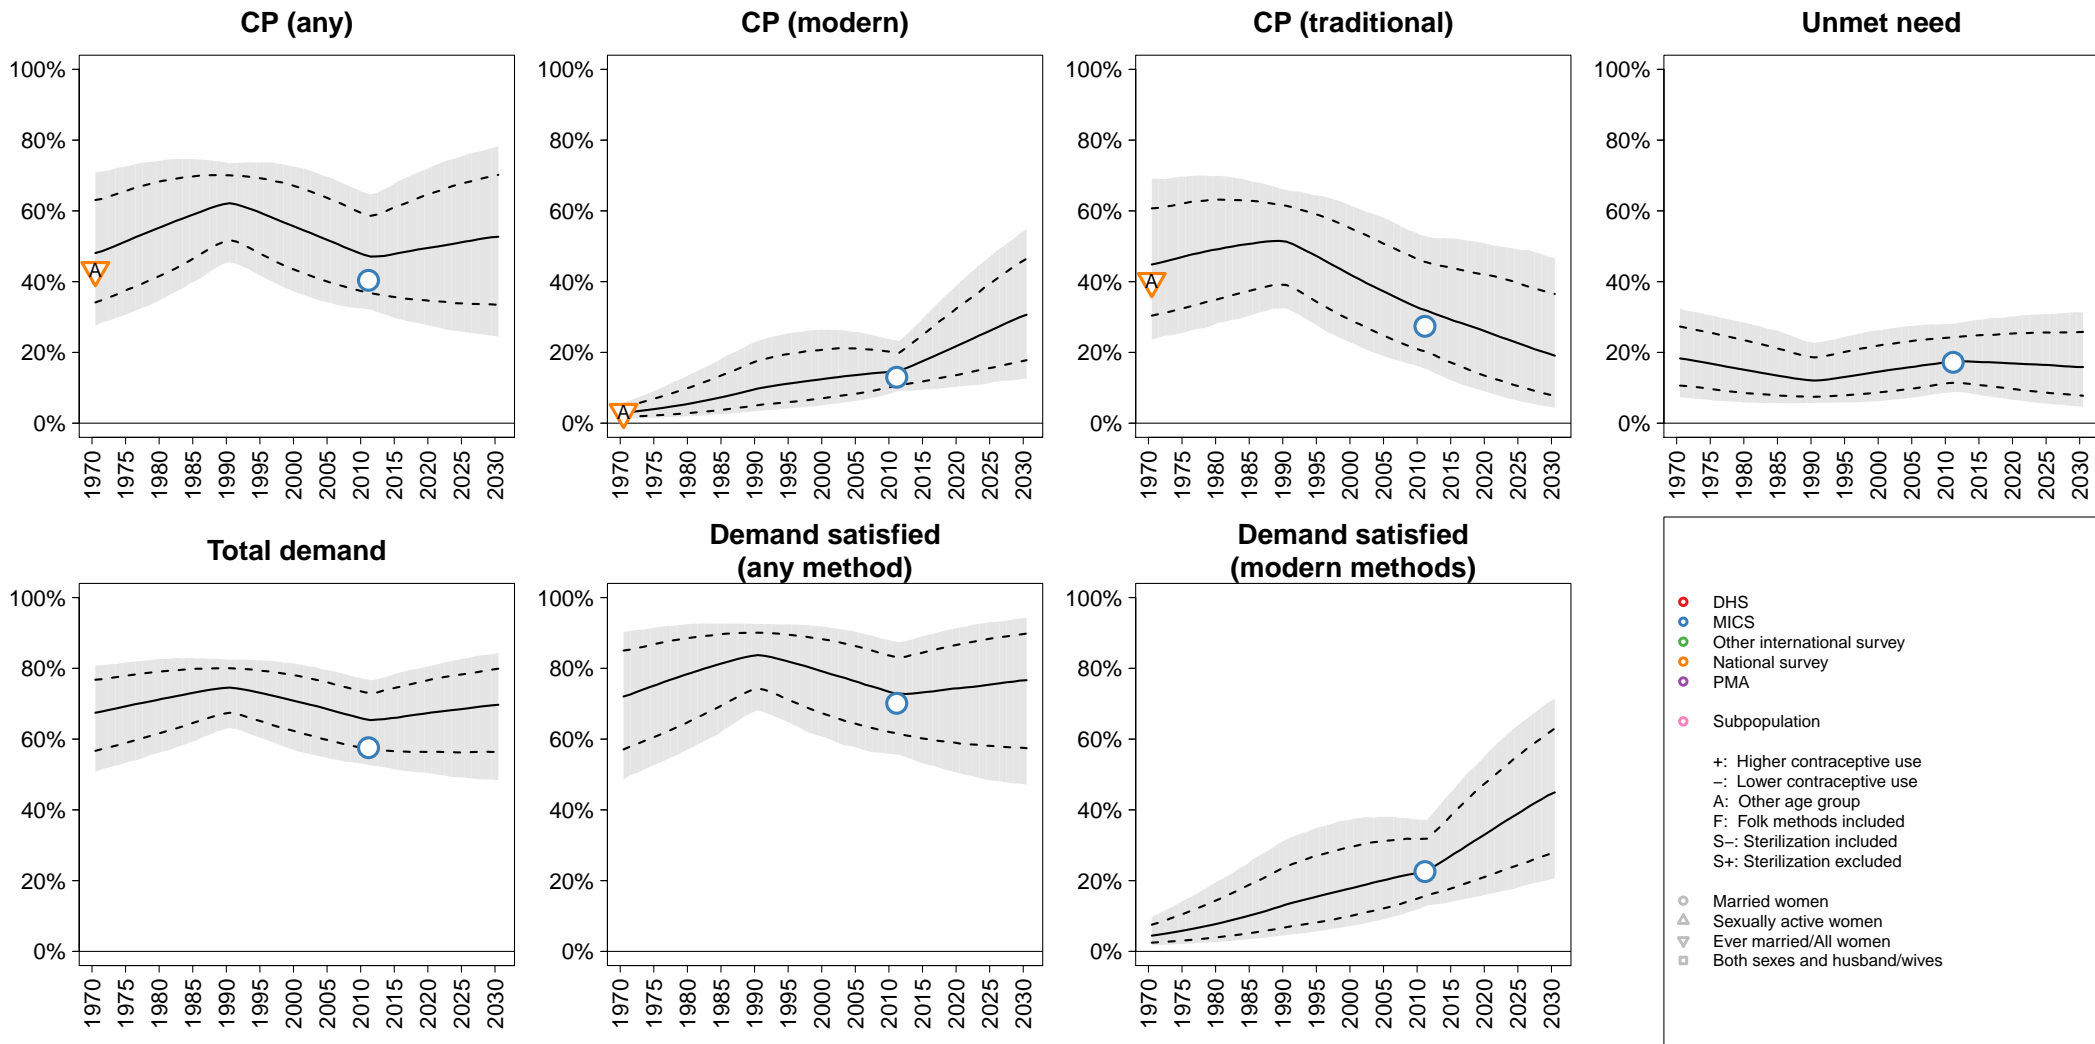

Togo (Western Africa) --- Married / In-Union

CP (any)

CP (modern)

CP (traditional)

Unmet need

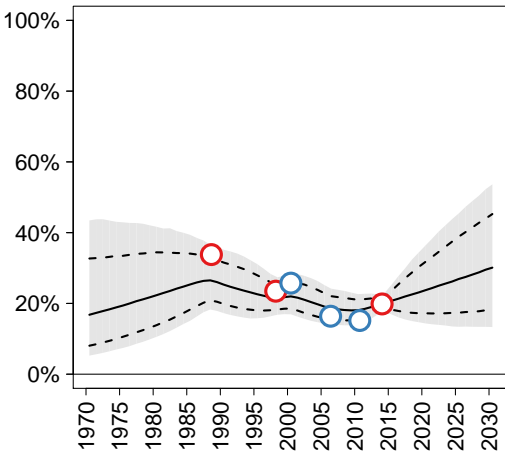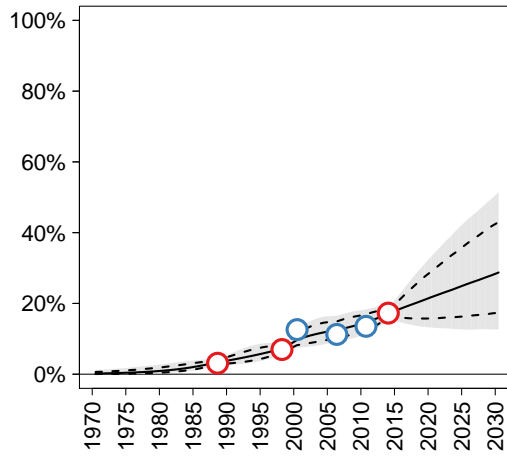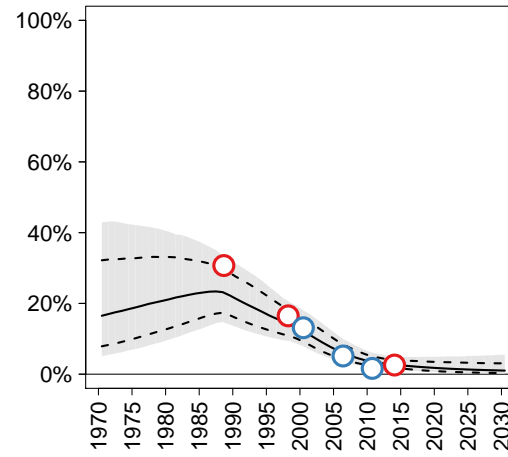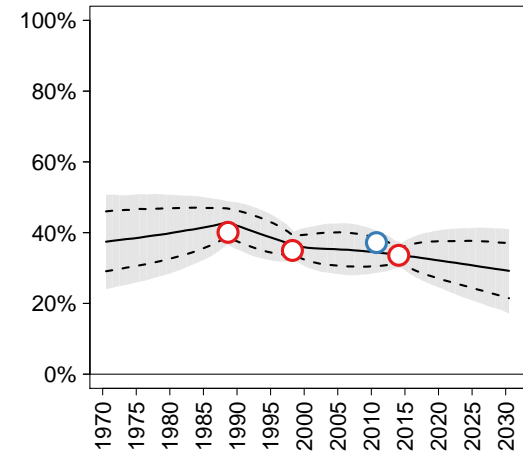

Total demand

Demand satisfied (any method)

Demand satisfied (modern methods)

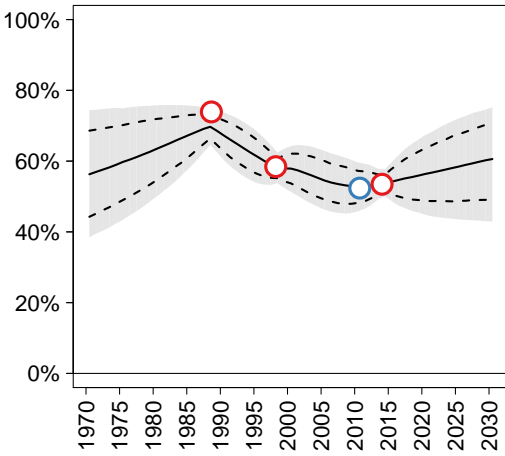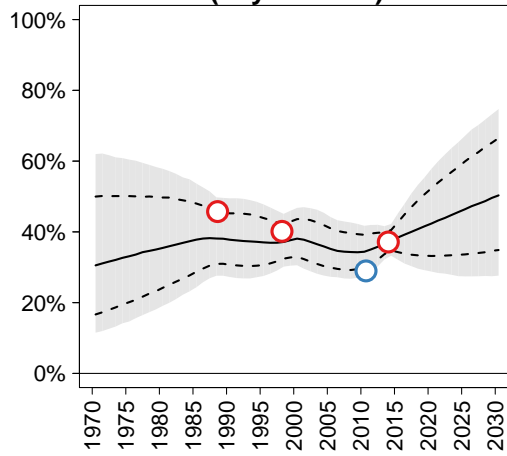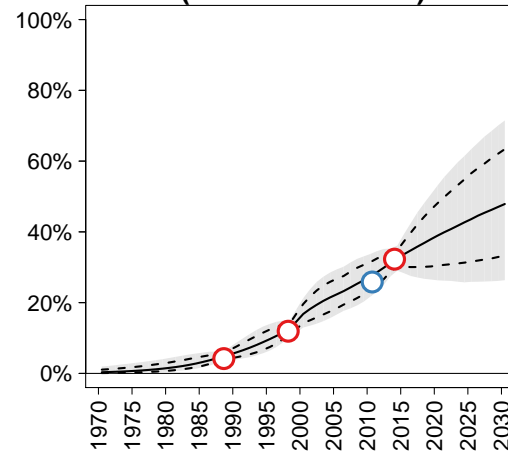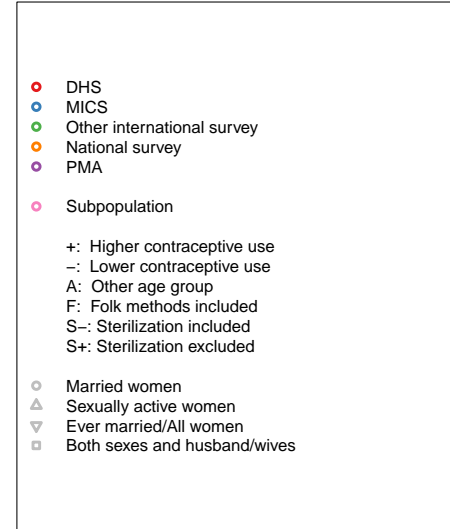

Tonga (Polynesia) --- Married / In-Union

CP (any)

CP (modern)

CP (traditional)

Unmet need

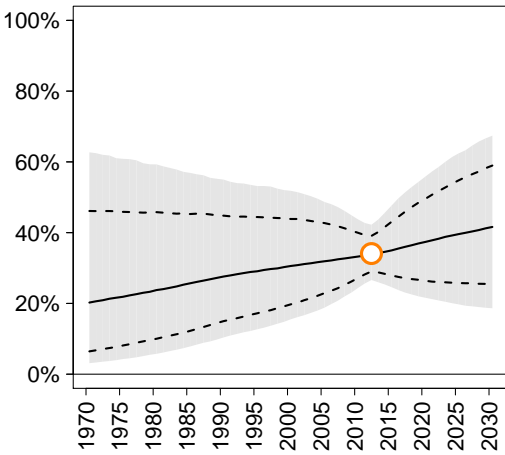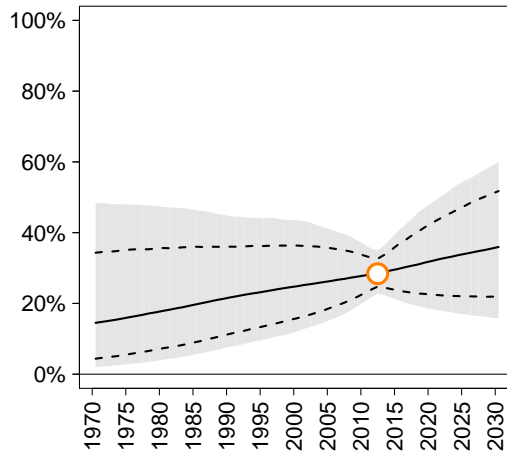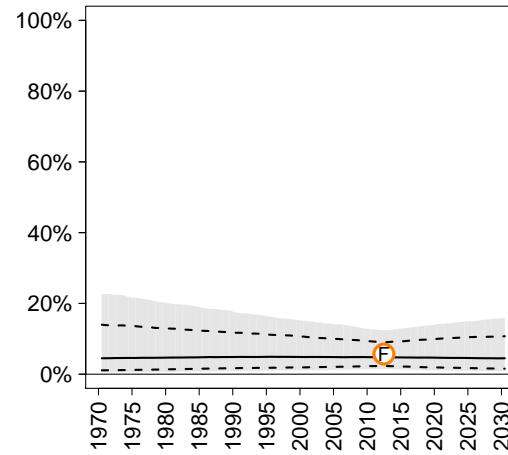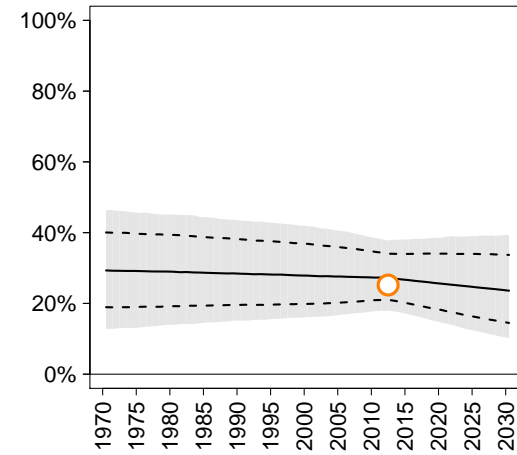

Total demand

Demand satisfied (any method)

Demand satisfied (modern methods)

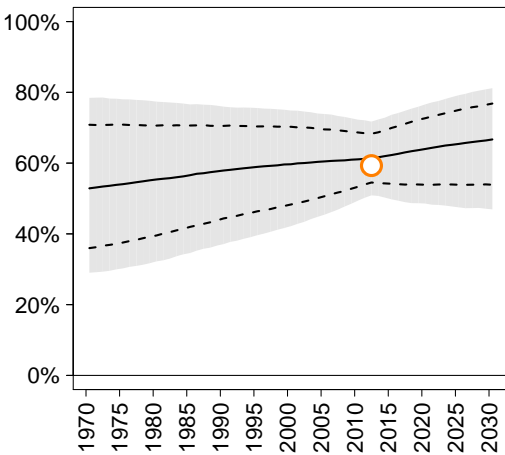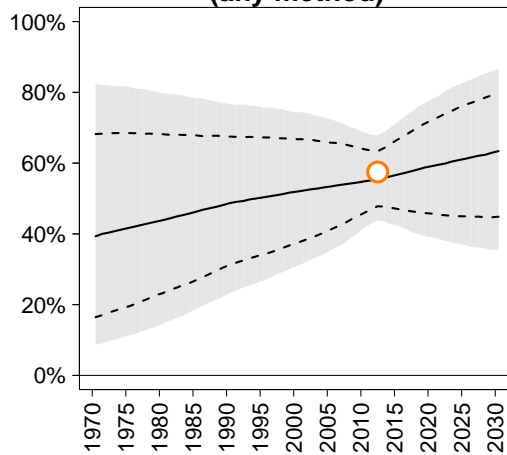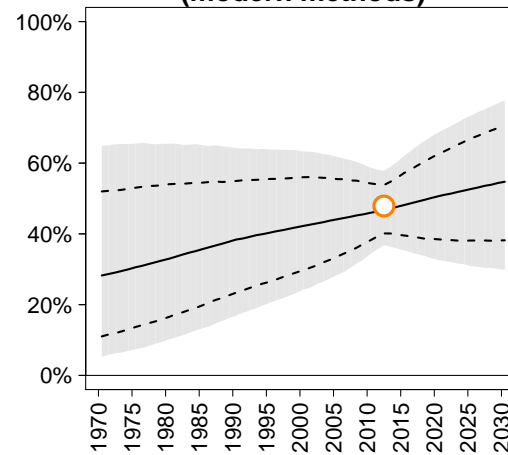

Trinidad and Tobago (Caribbean) --- Married / In-Union

CP (any)

CP (modern)

CP (traditional)

Unmet need

Total demand

Demand satisfied (any method)

Demand satisfied (modern methods)

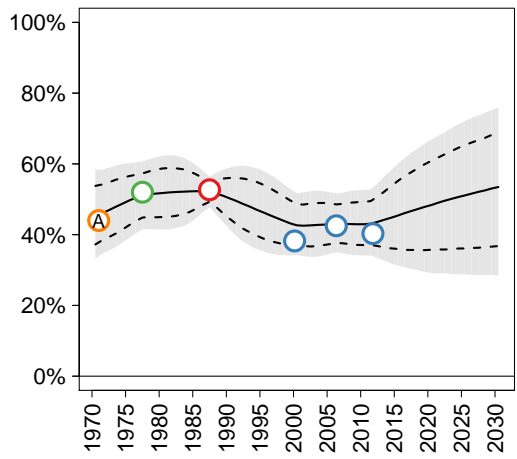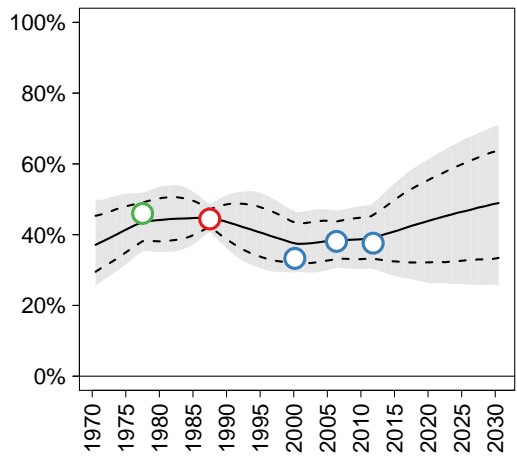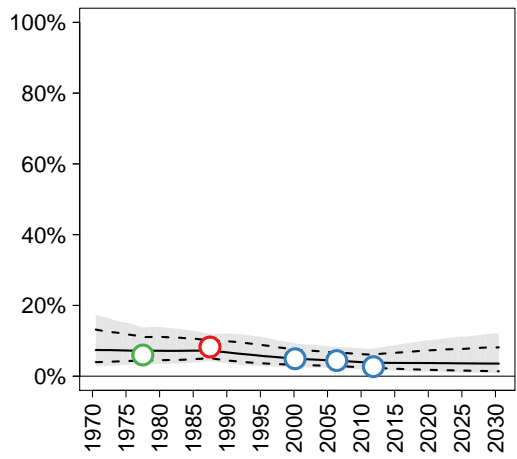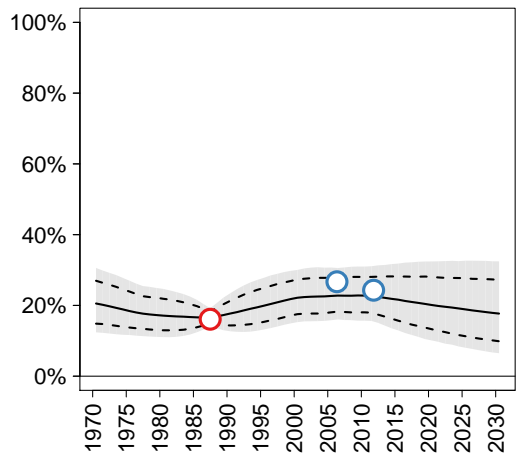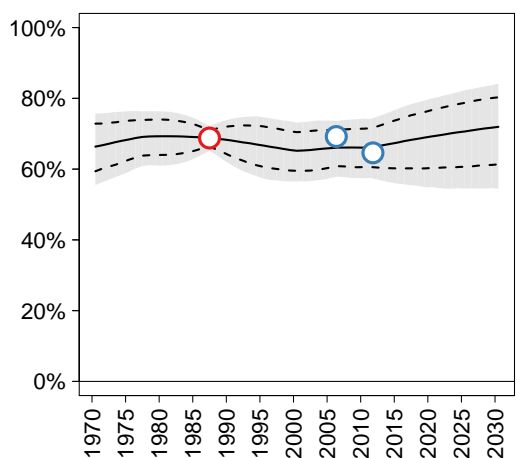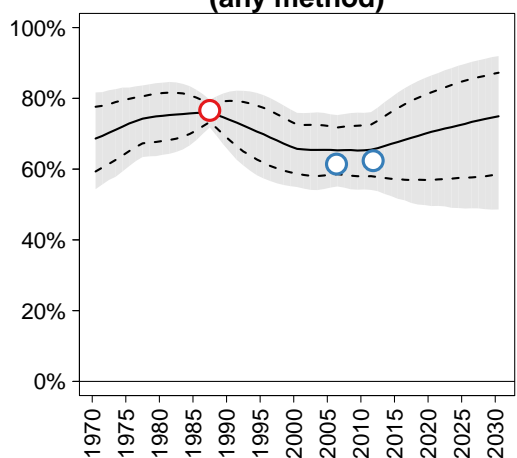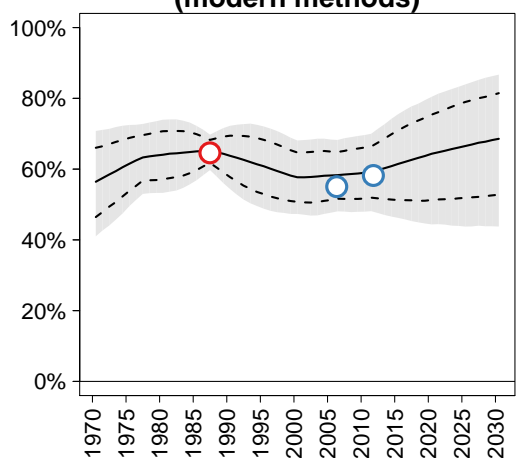

Tunisia (Northern Africa) --- Married / In-Union

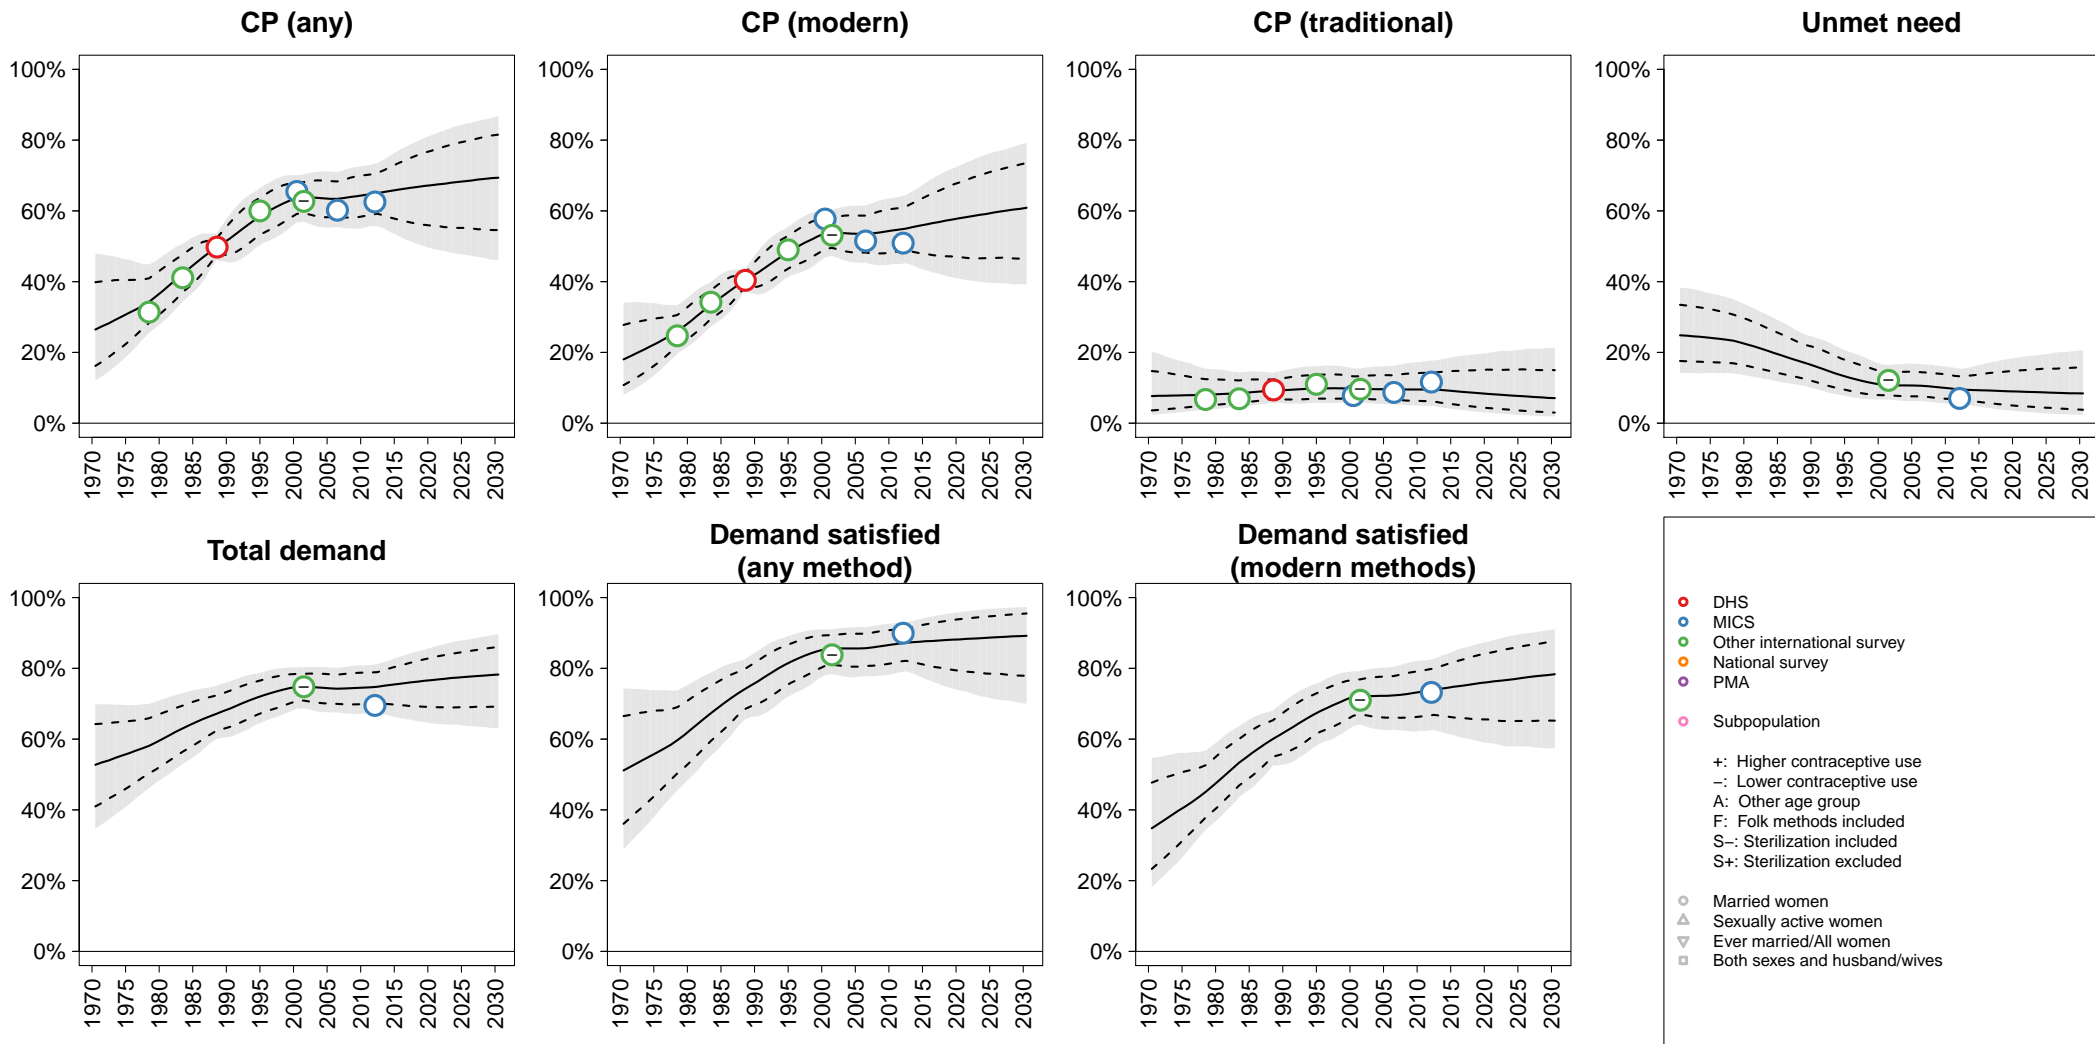

Turkey (Western Asia) --- Married / In-Union

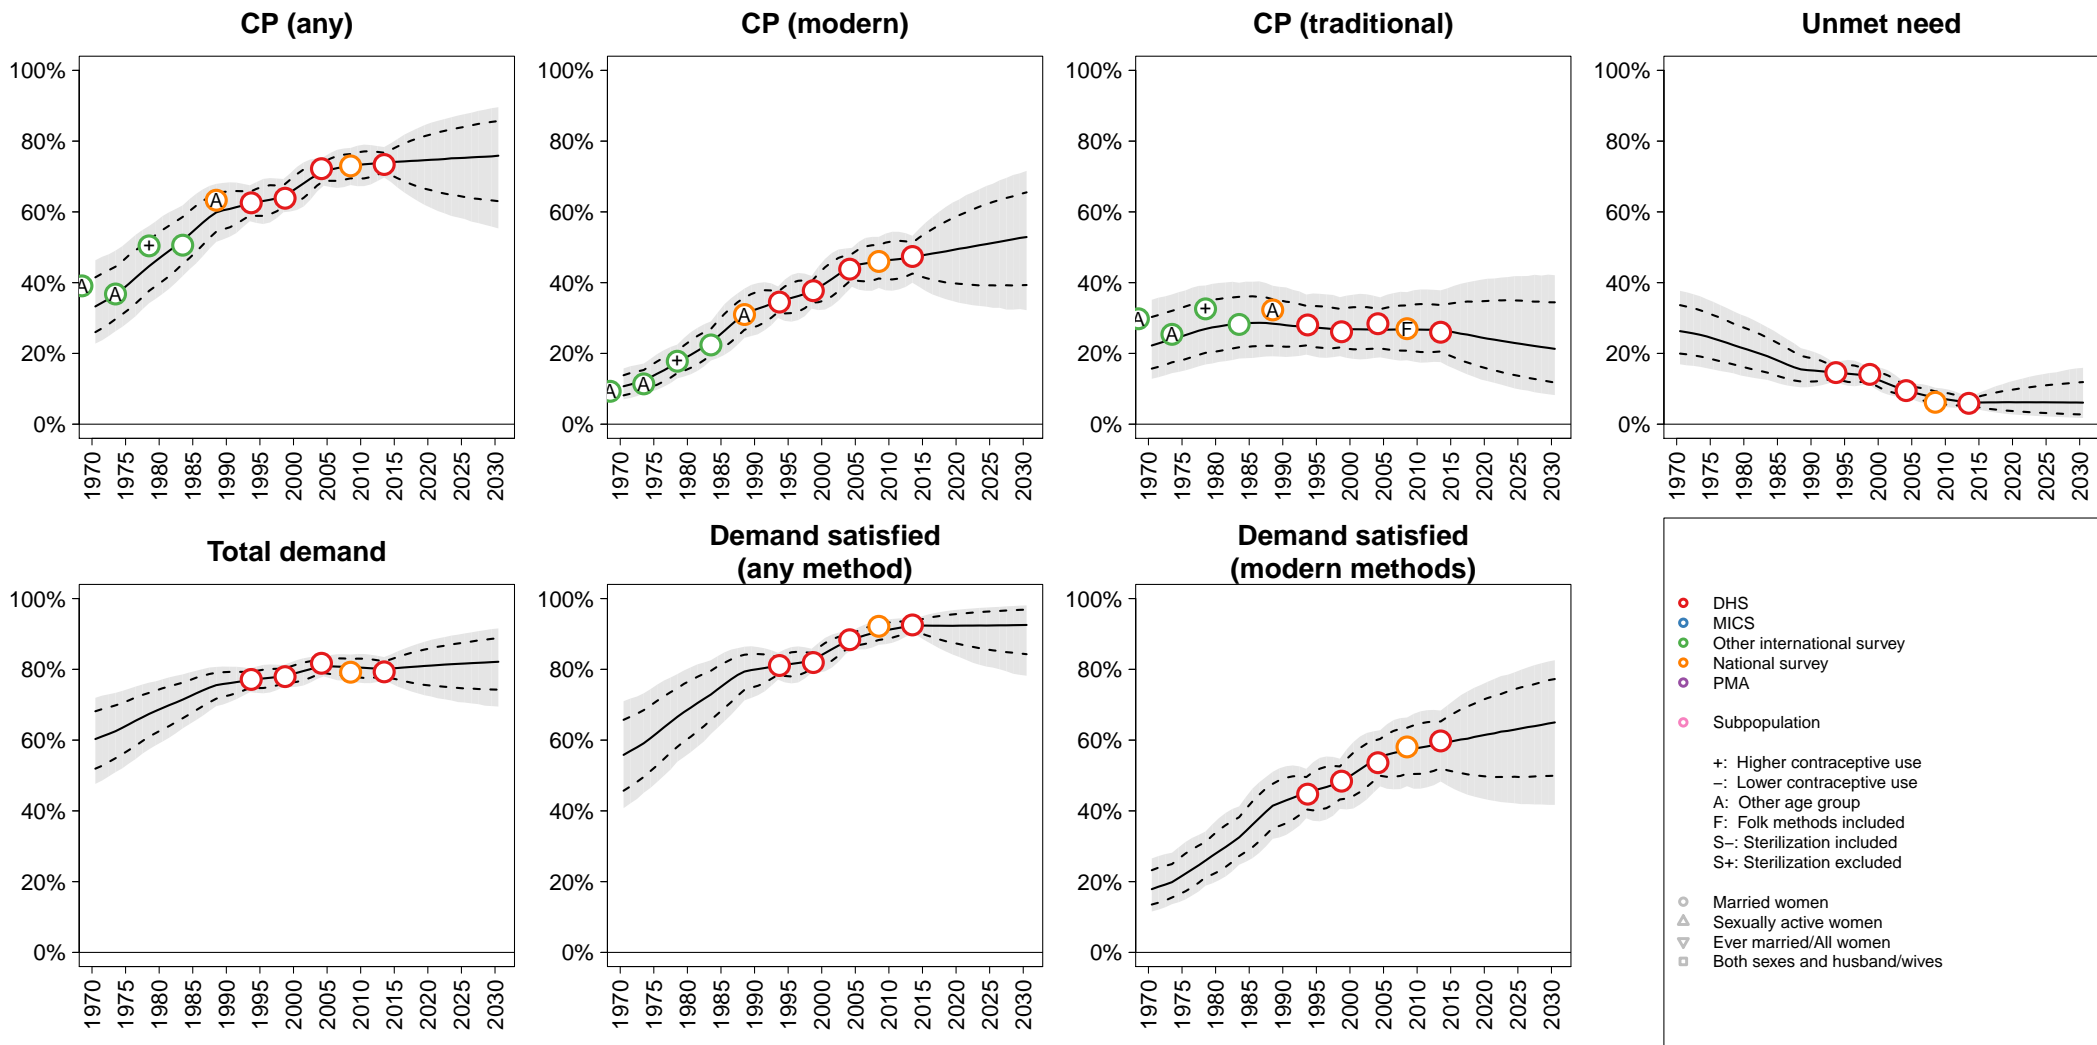



Turkmenistan (Central Asia) --- Married / In-Union

CP (any)

CP (modern)

CP (traditional)

Unmet need

Total demand

Demand satisfied (any method)

Demand satisfied (modern methods)

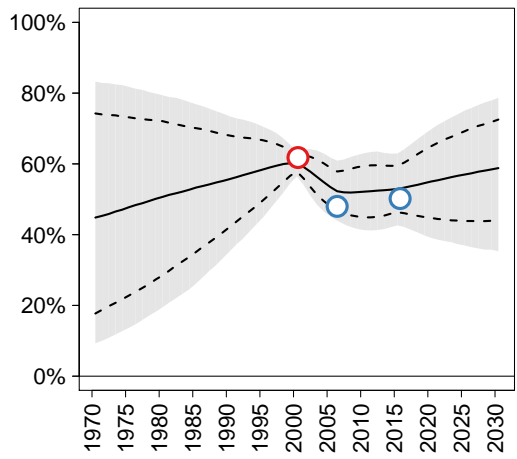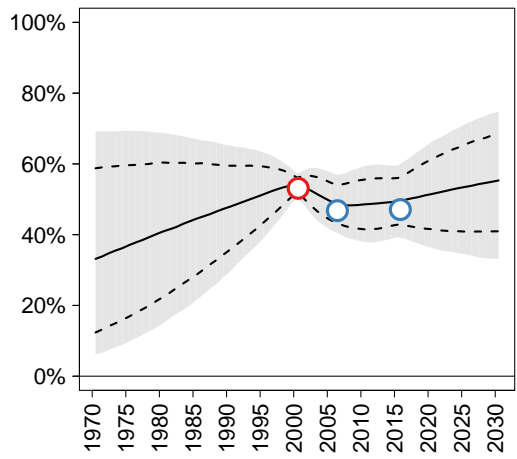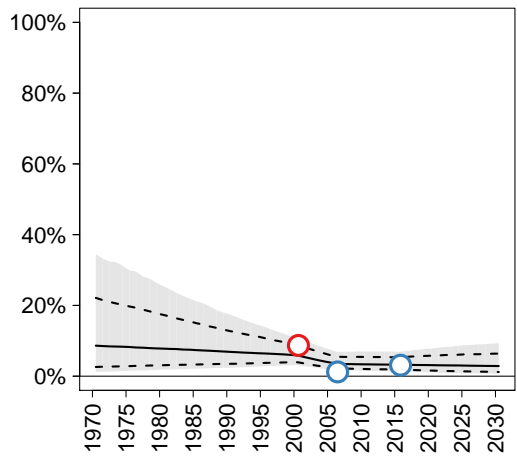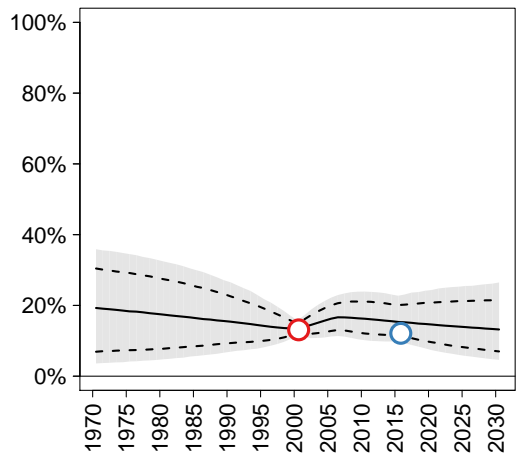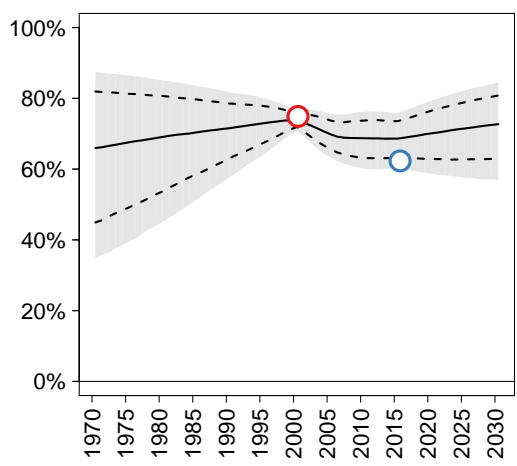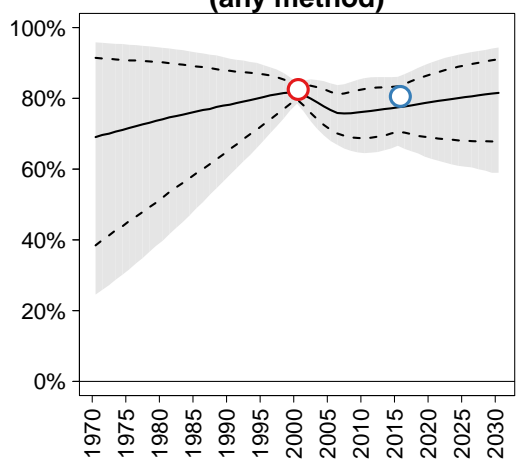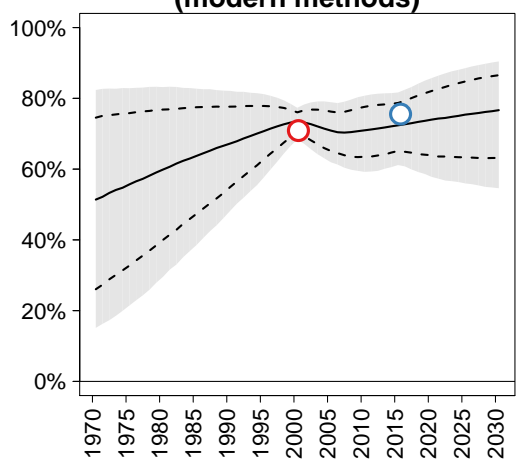

Uganda (Eastern Africa) --- Married / In-Union

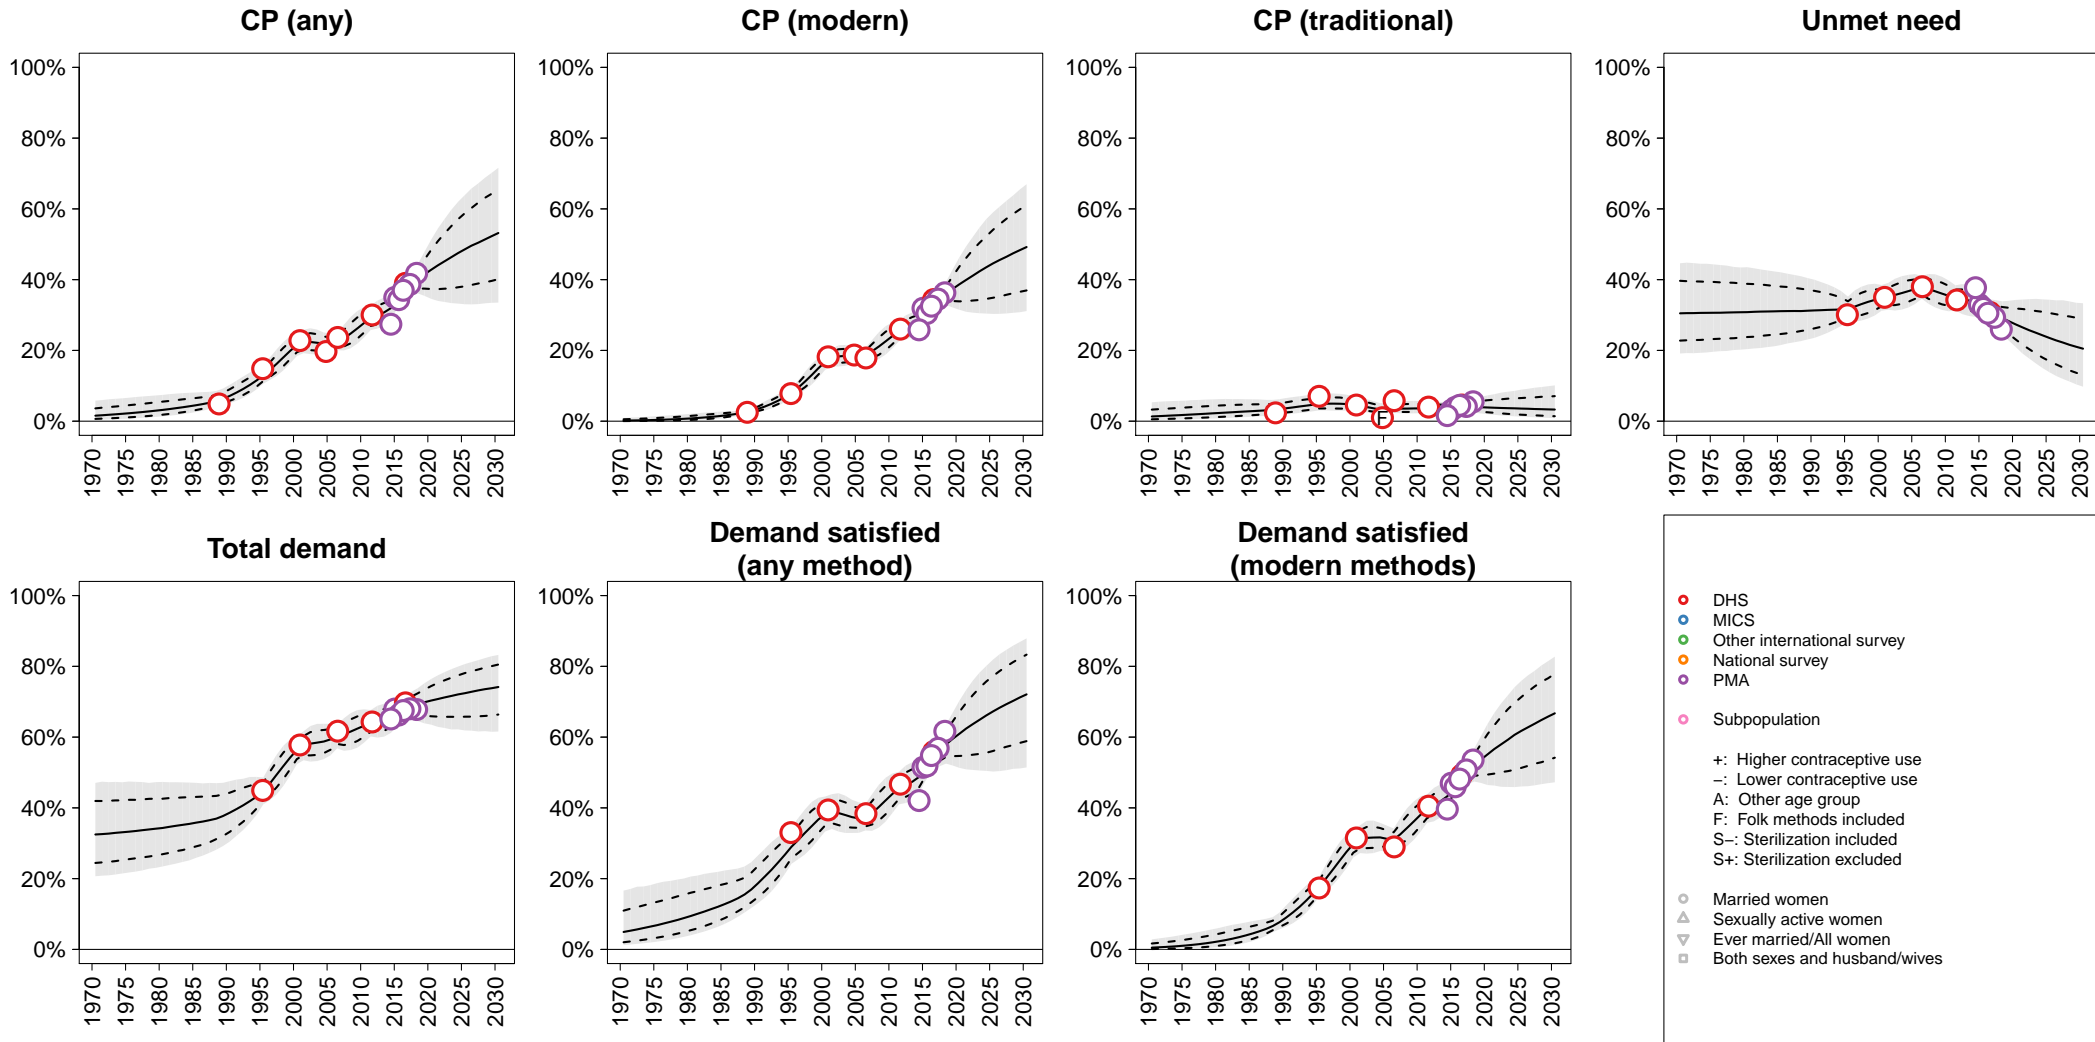

Ukraine (Eastern Europe) --- Married / In-Union

CP (any)

CP (modern)

CP (traditional)

Unmet need

Total demand

Demand satisfied (any method)

Demand satisfied (modern methods)

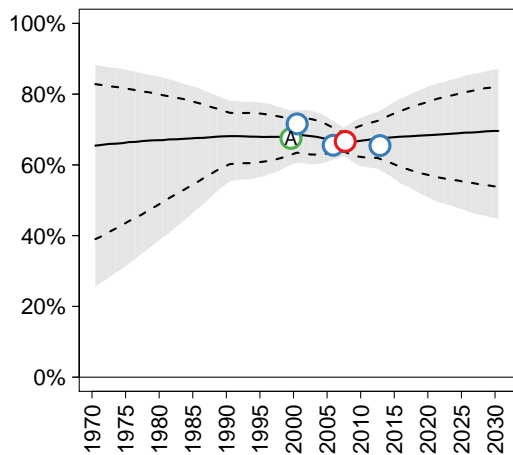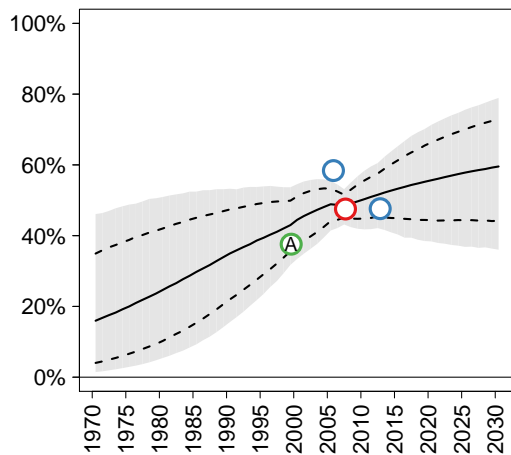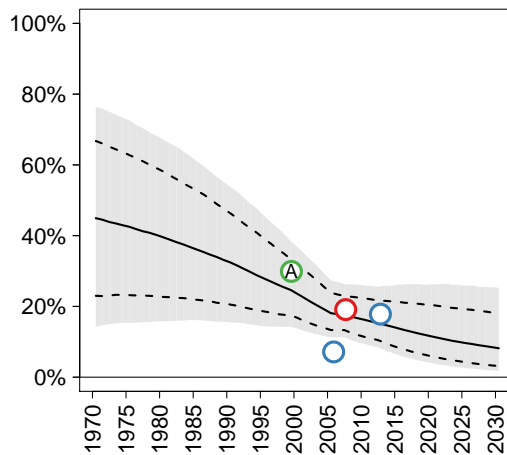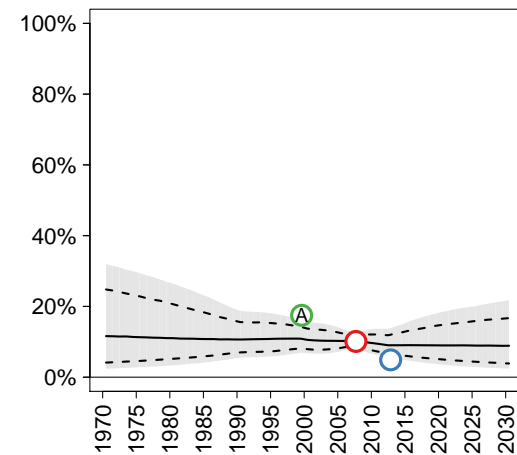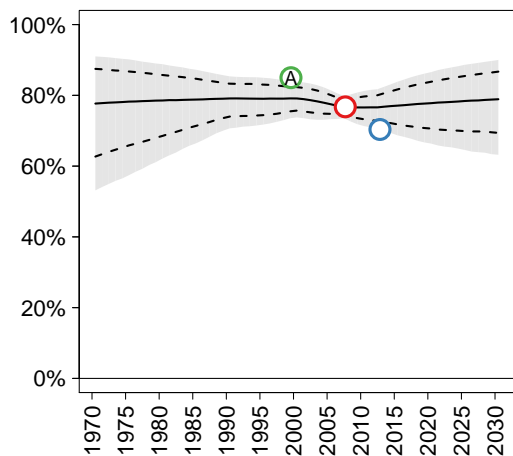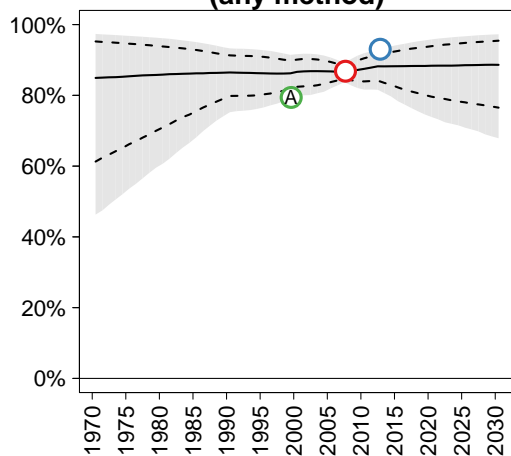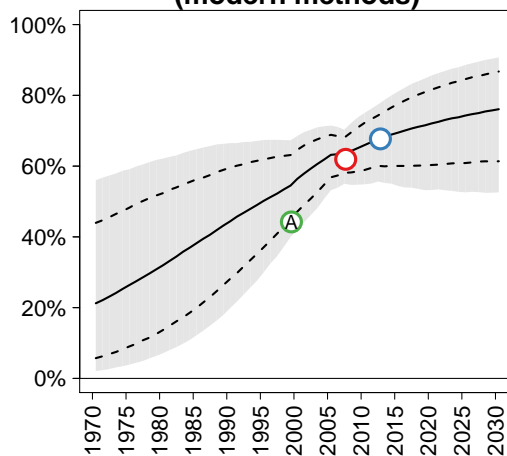

United Arab Emirates (Western Asia) --- Married / In-Union

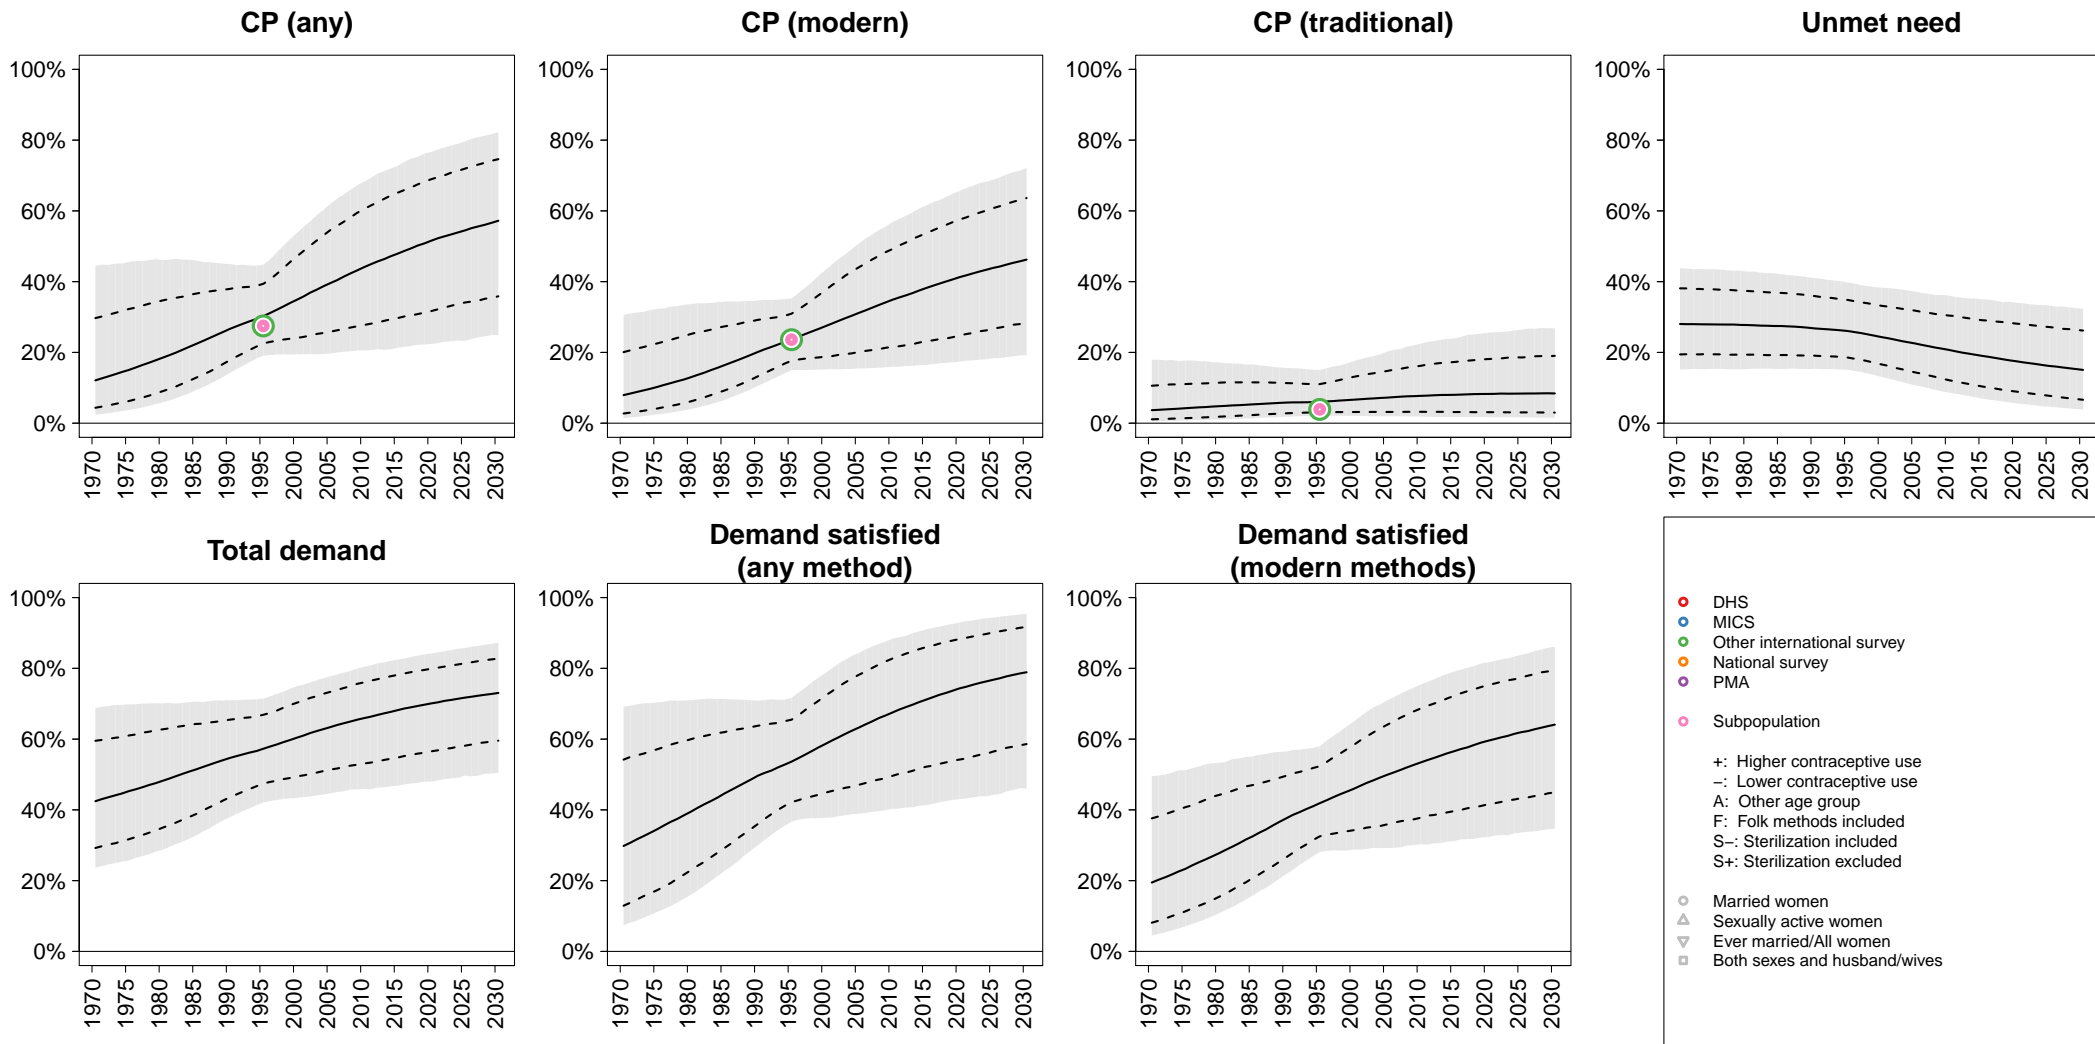

United Kingdom of Great Britain and Northern Ireland (Northern Europe) --- Married / In-Union

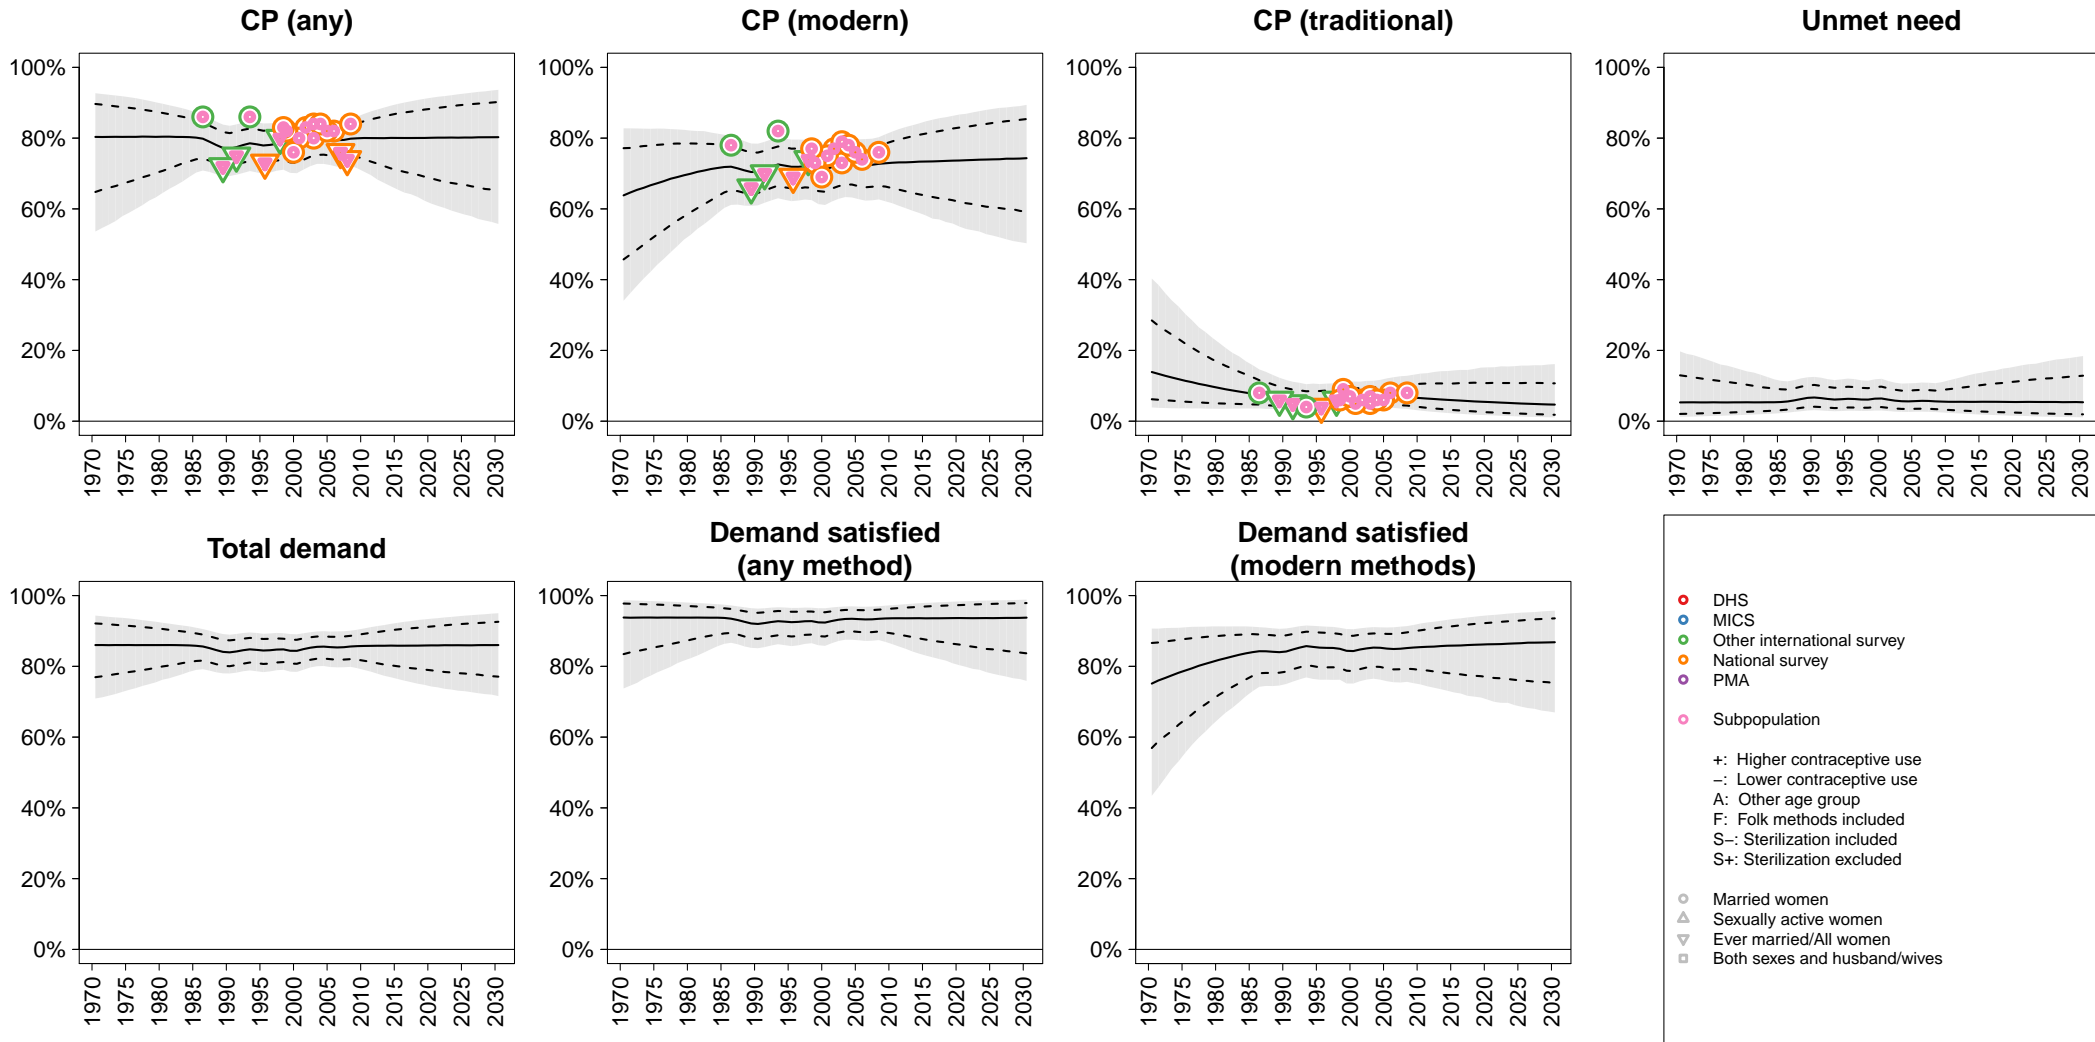

United Rep. of Tanzania (Eastern Africa) --- Married / In-Union

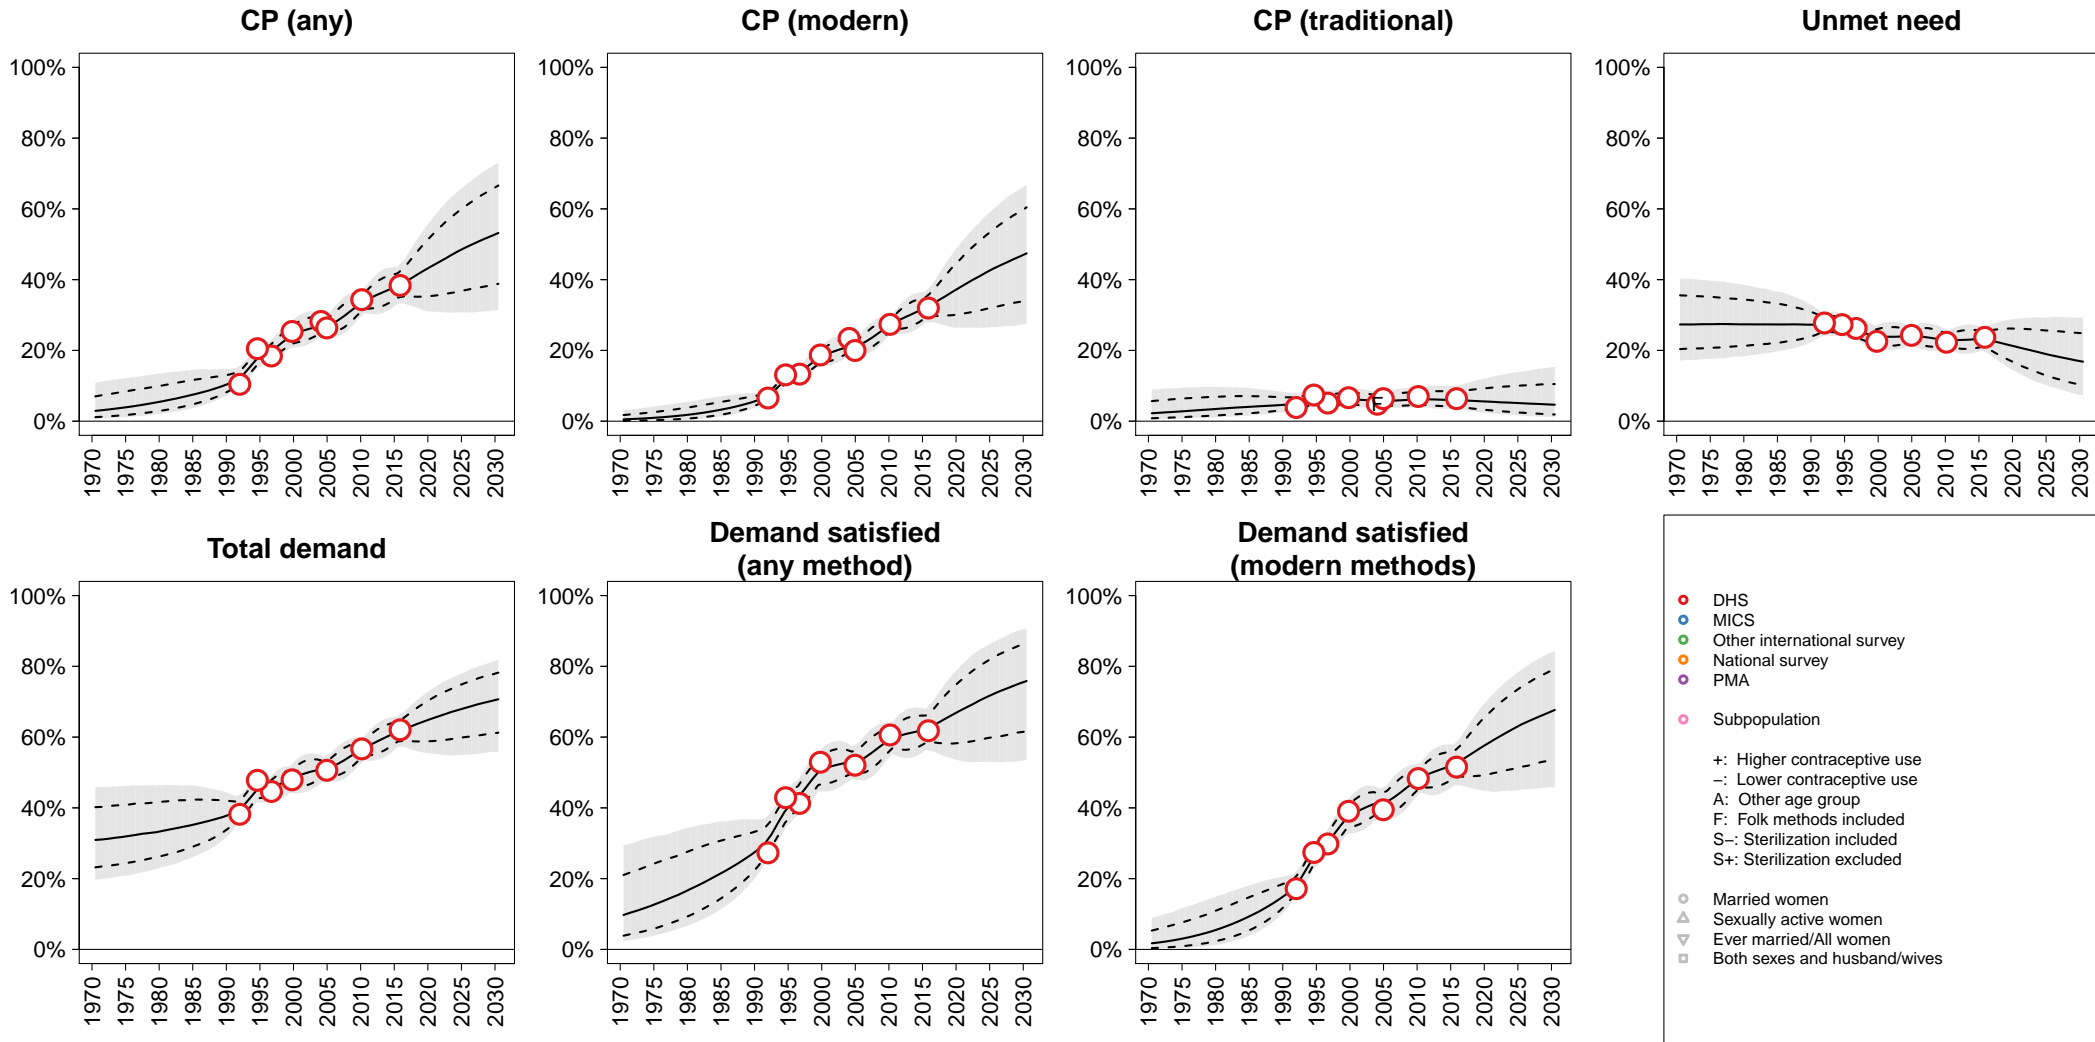

United States of America (Northern America) --- Married / In-Union

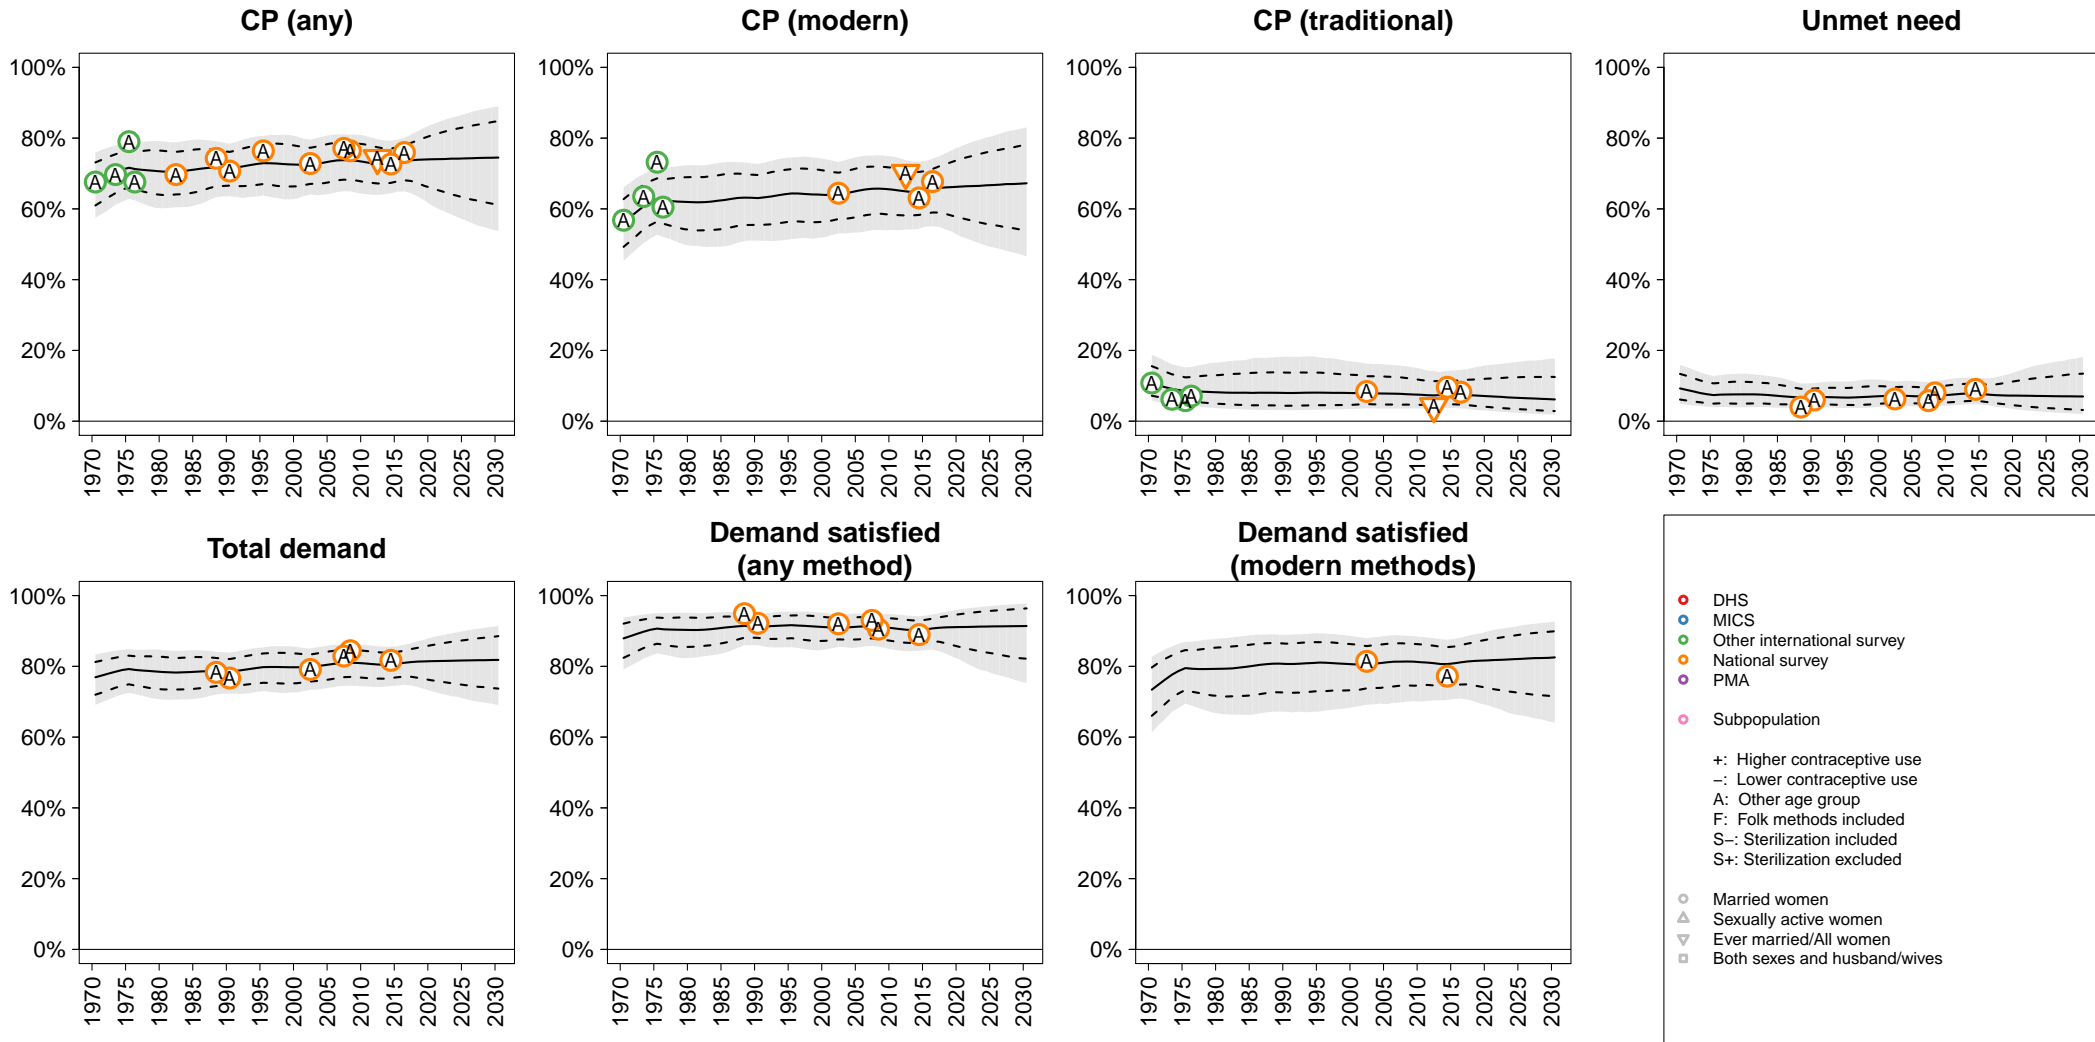

United States Virgin Islands (Caribbean) --- Married / In-Union

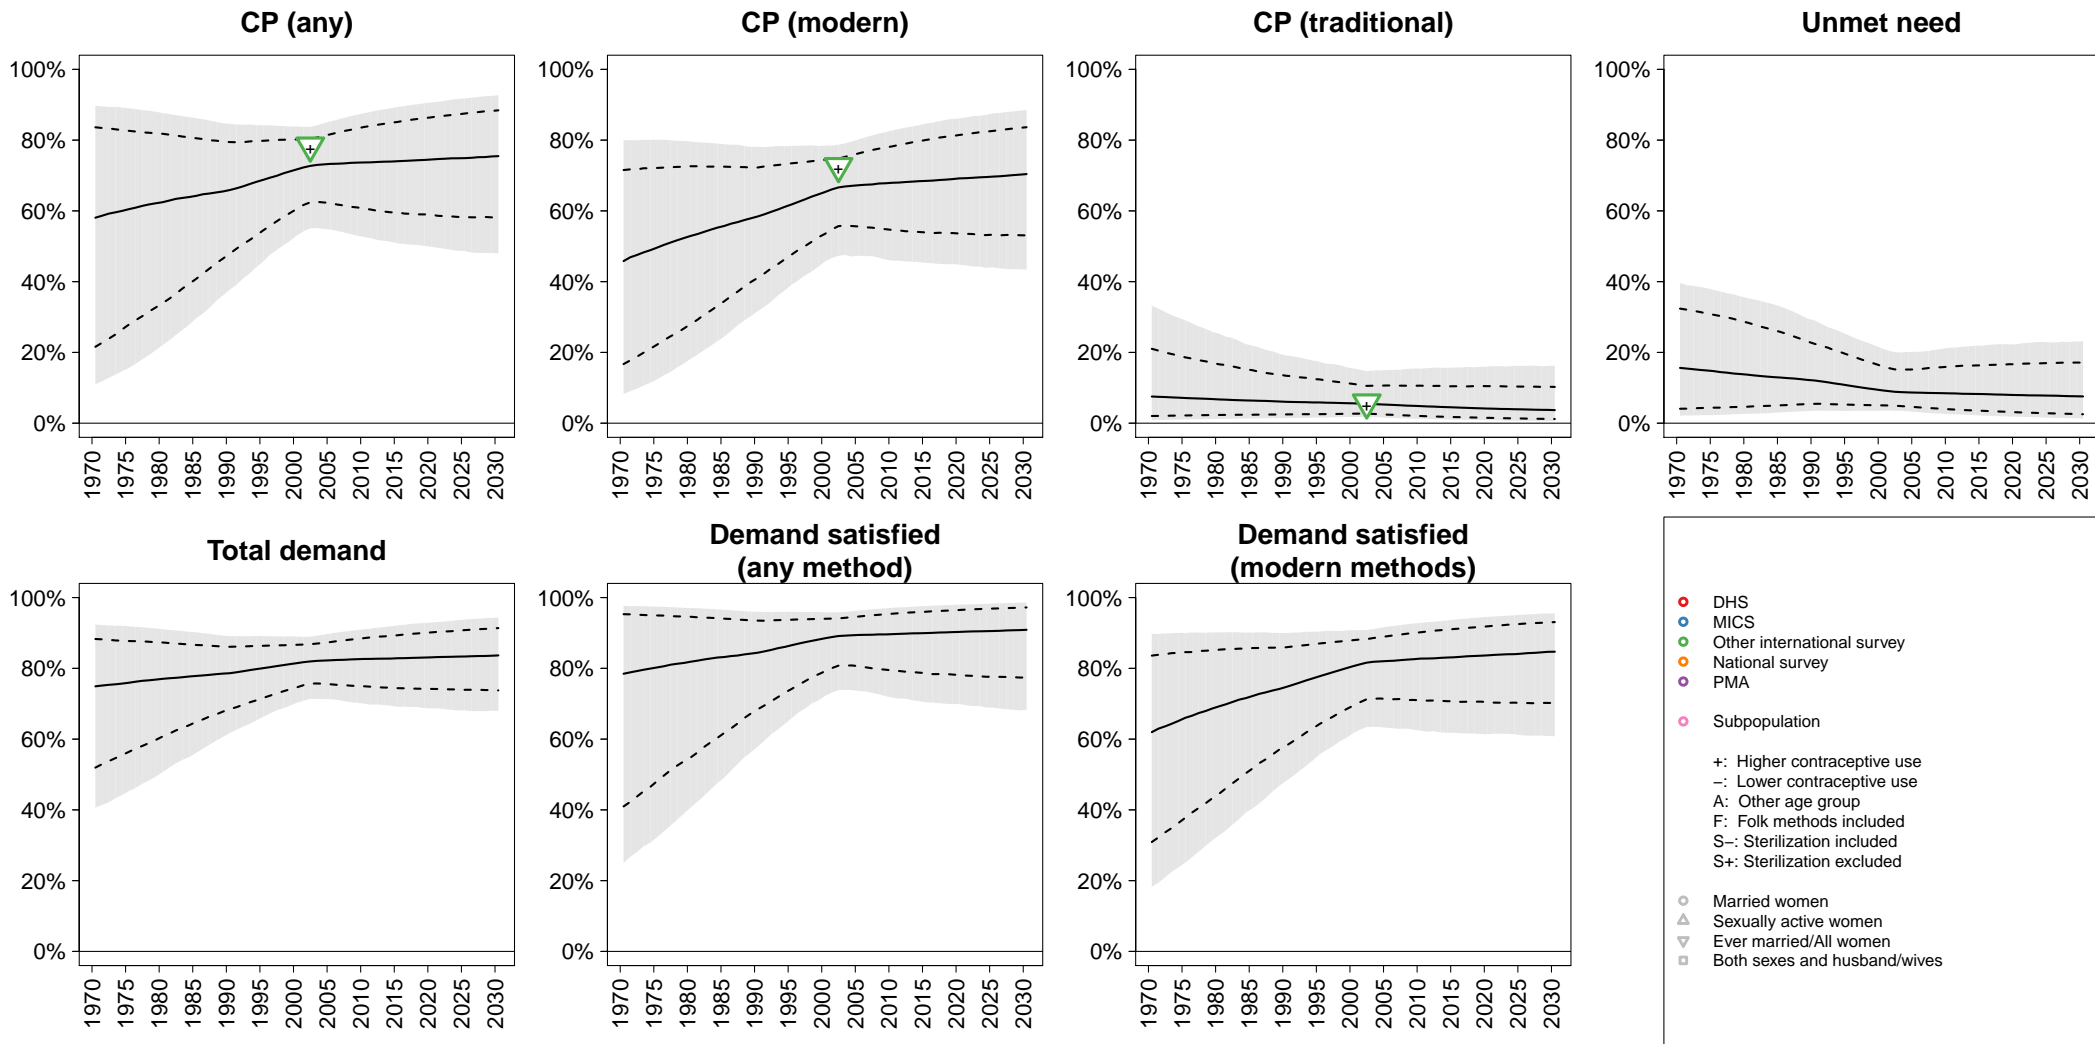



Uruguay (South America) --- Married / In-Union

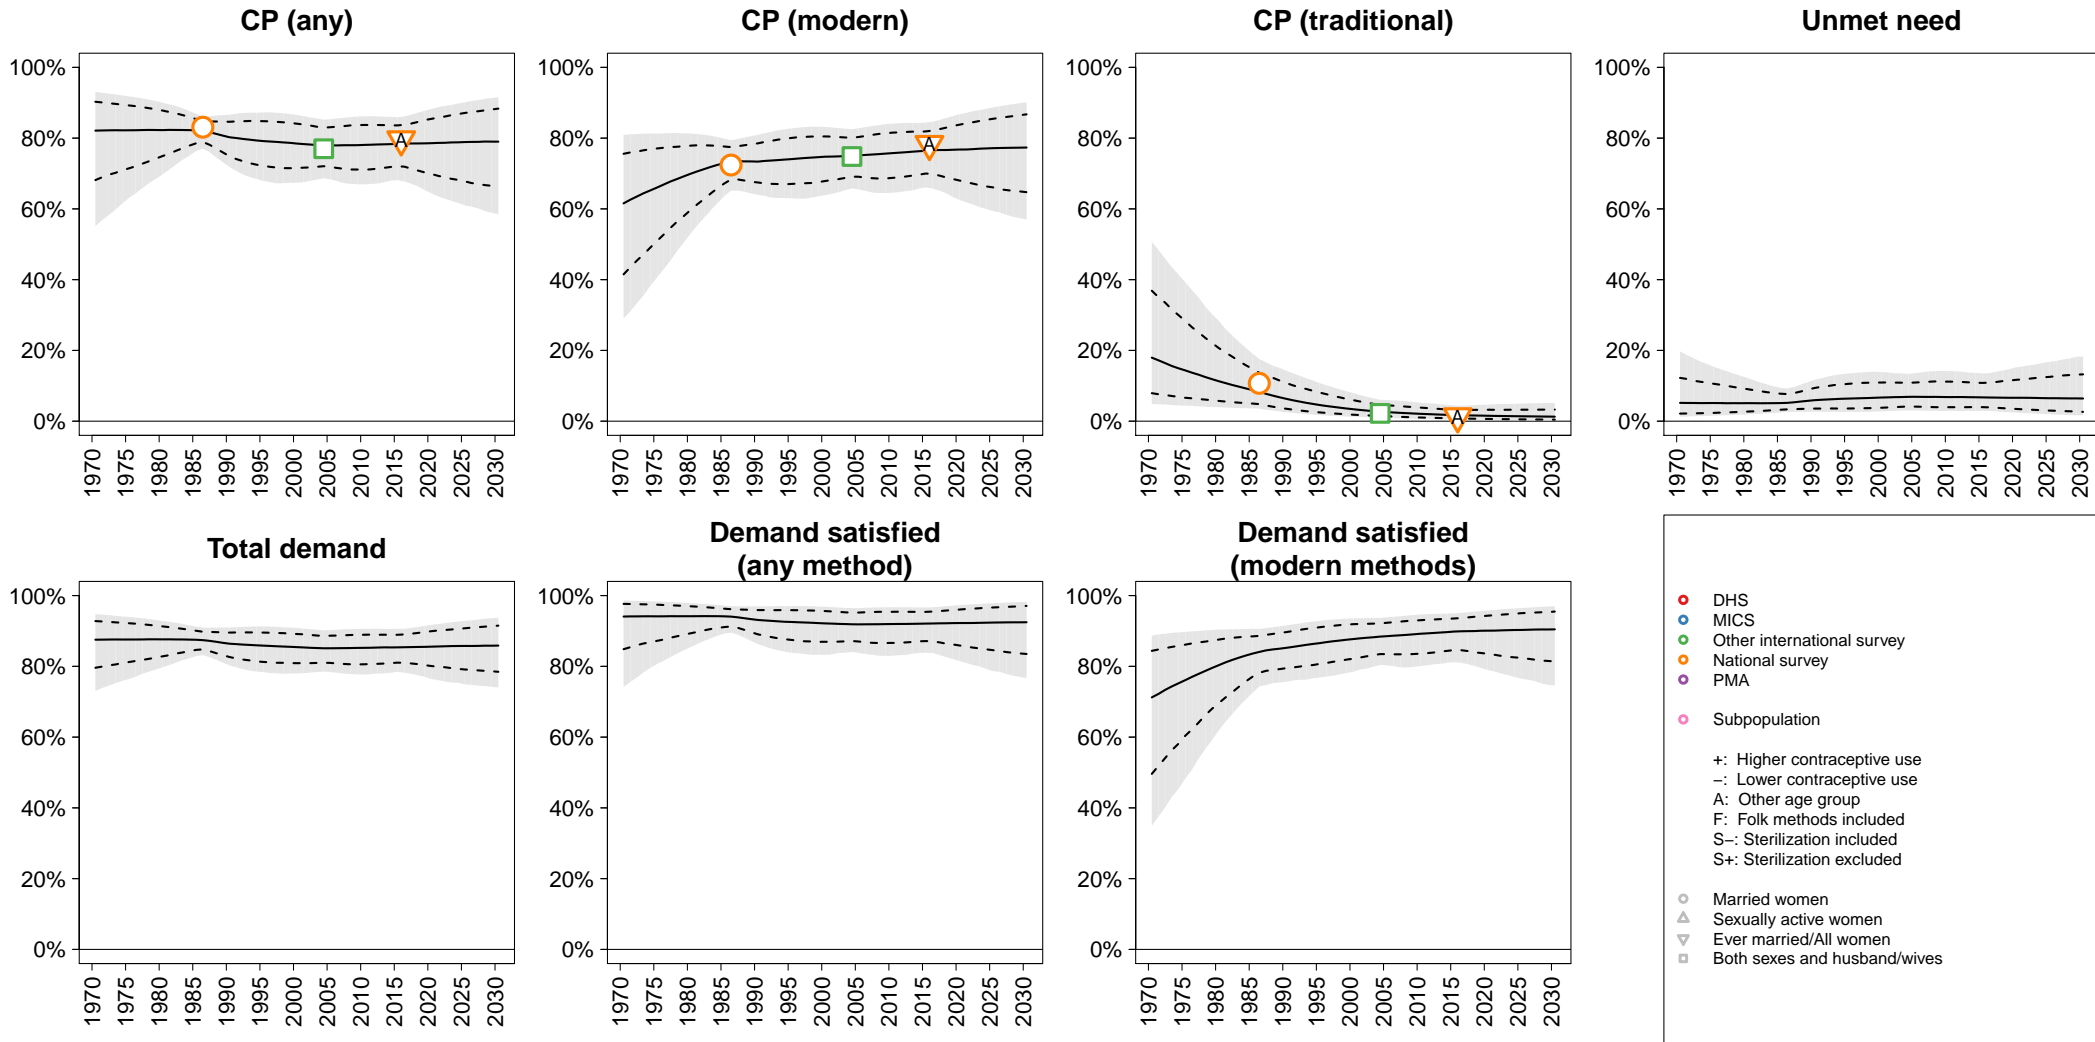

Uzbekistan (Central Asia) --- Married / In-Union

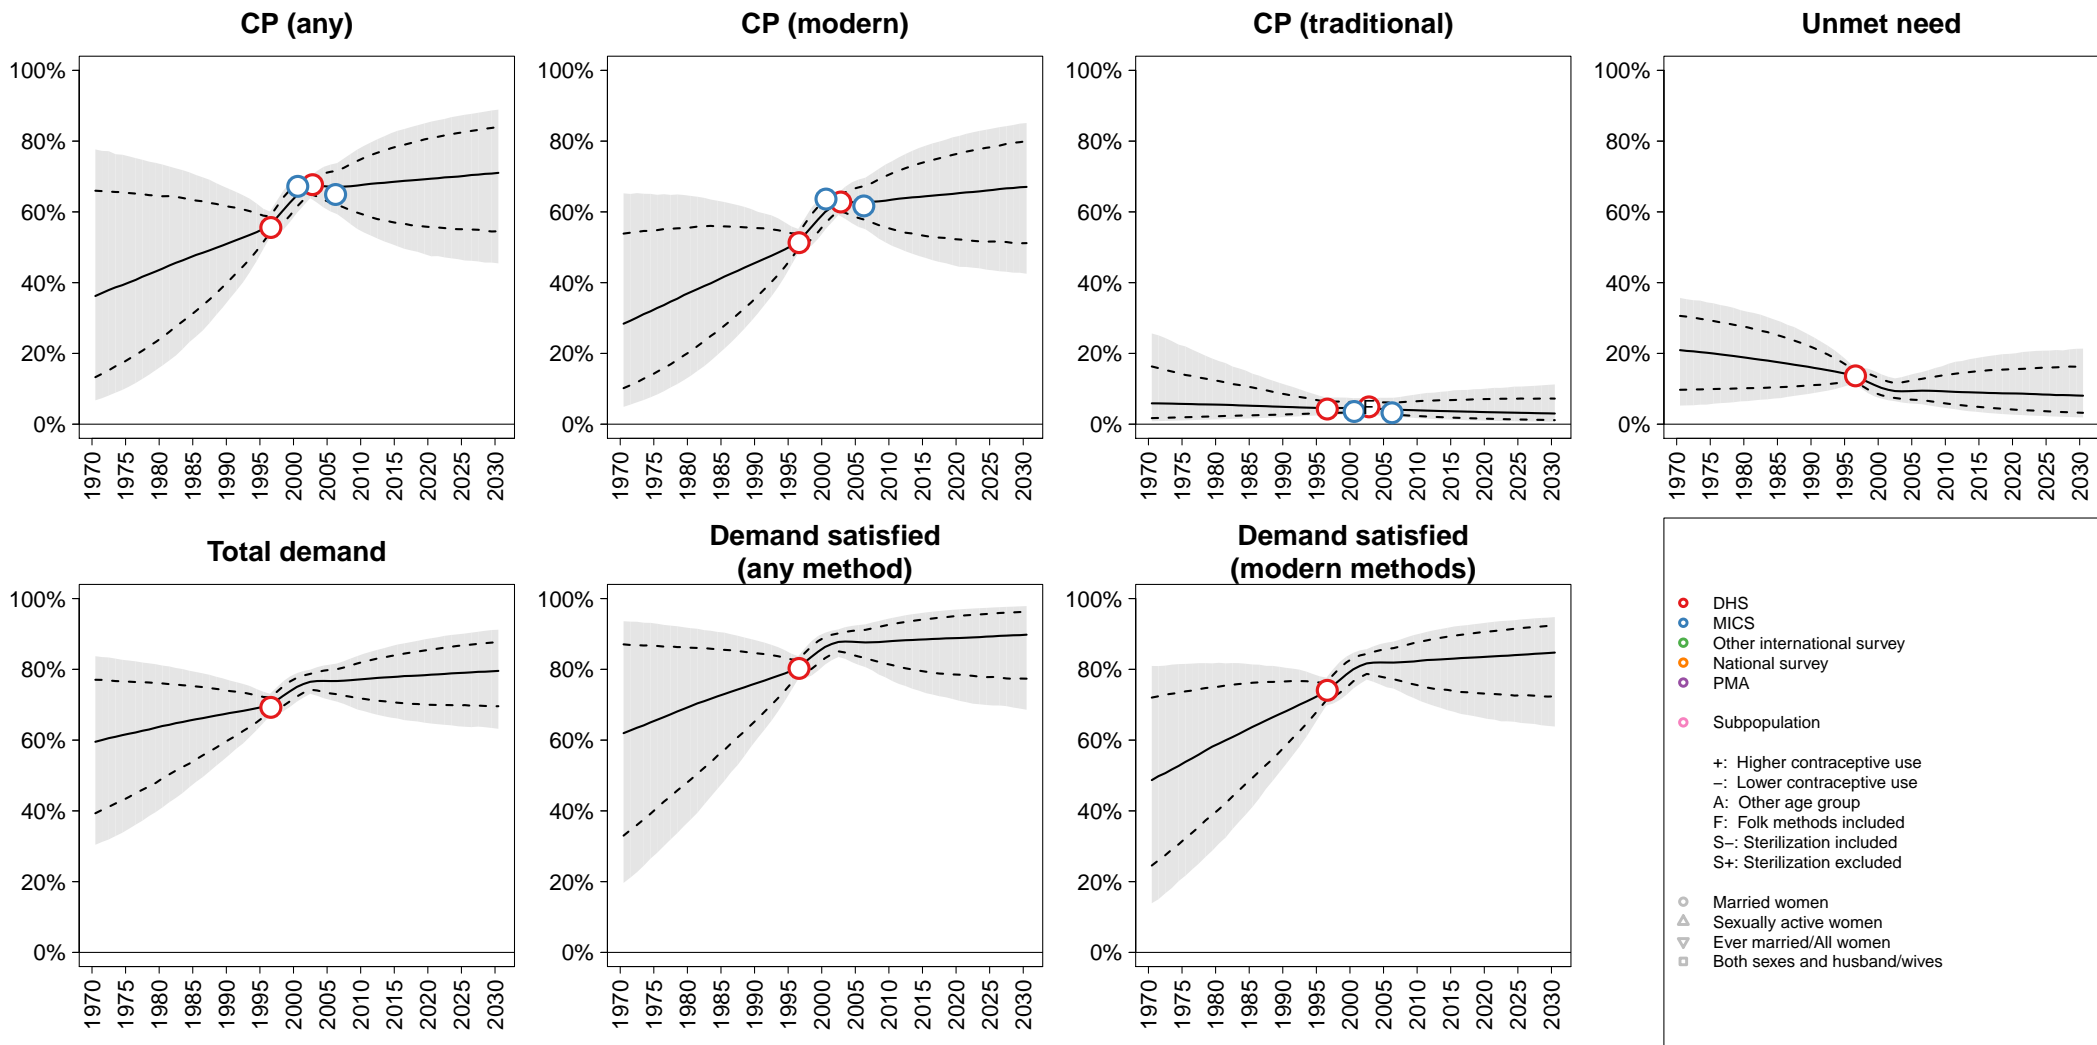

Vanuatu (Melanesia) --- Married / In-Union

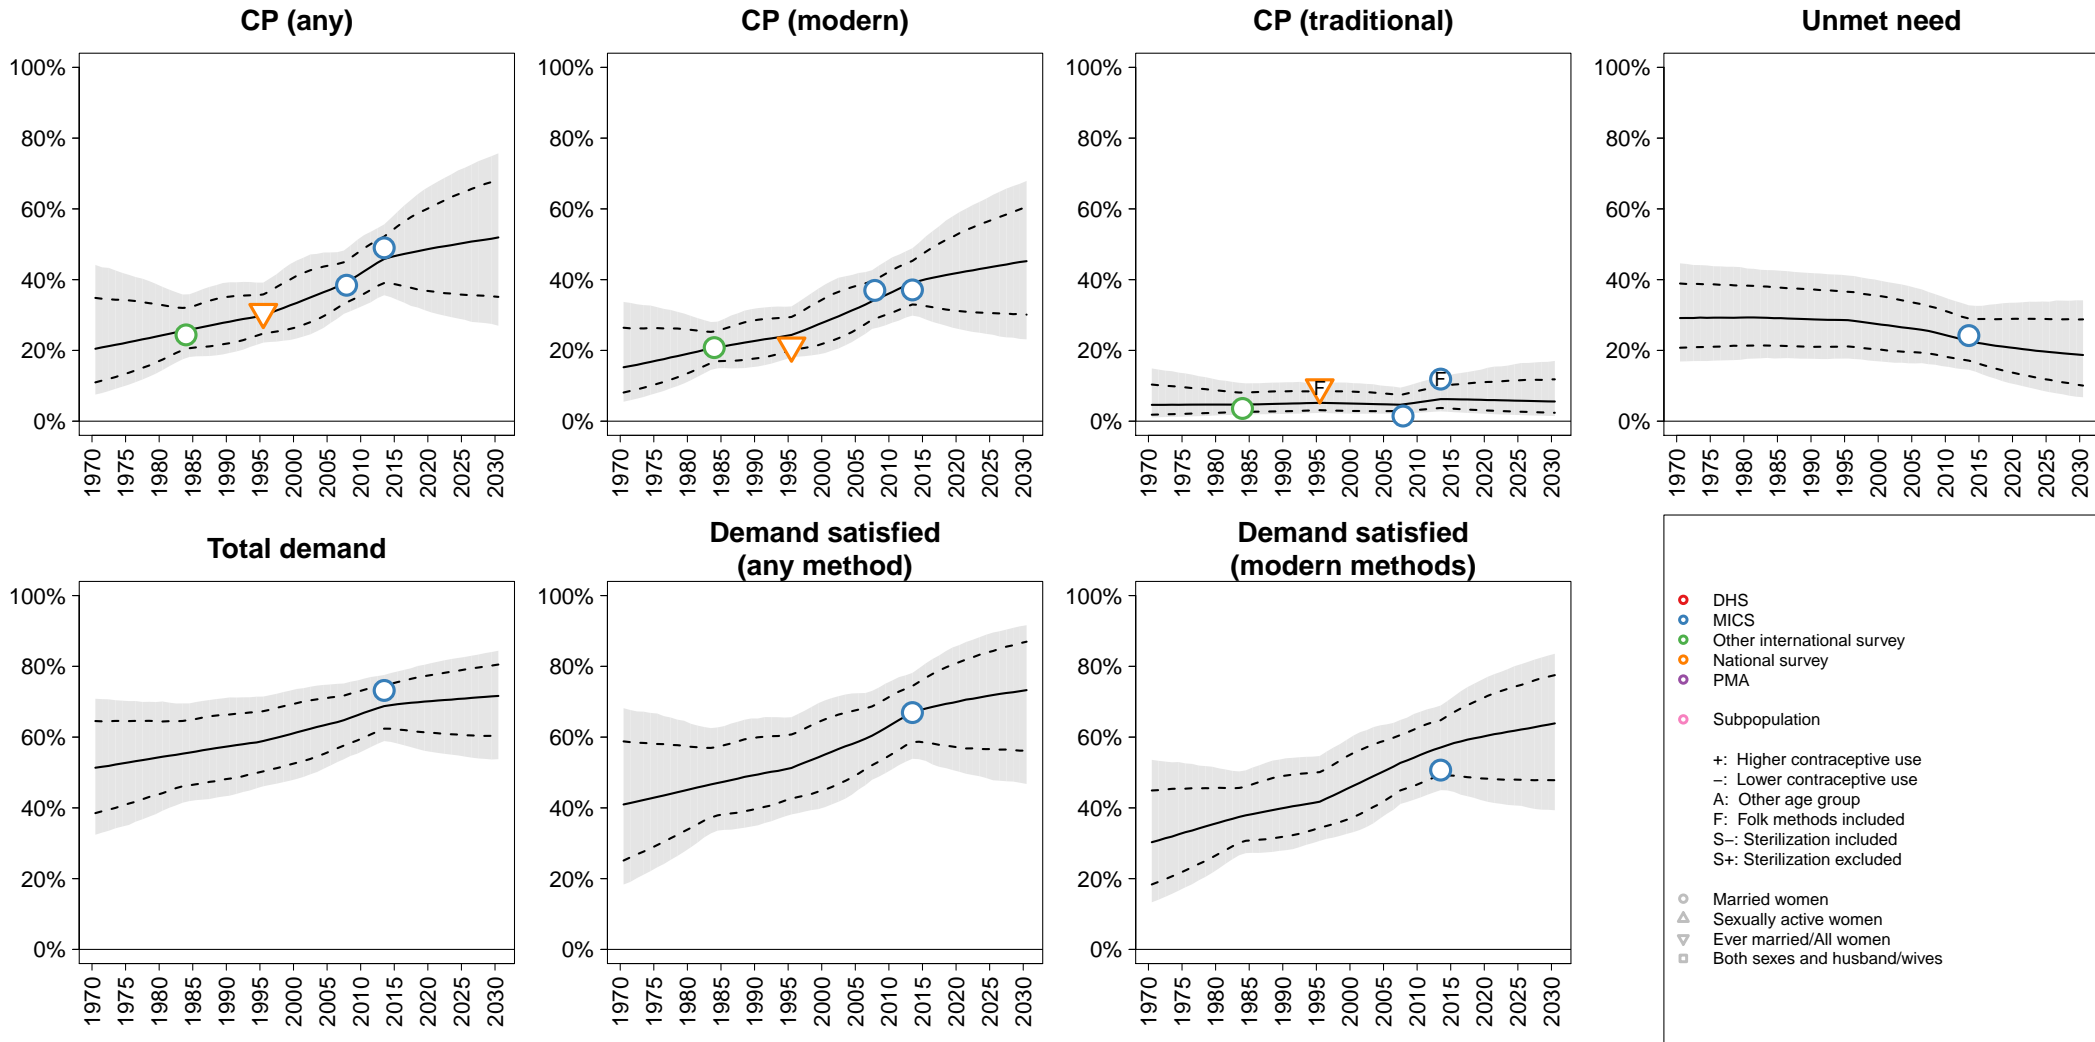

Venezuela, Bolivarian Republic of (South America) --- Married / In-Union

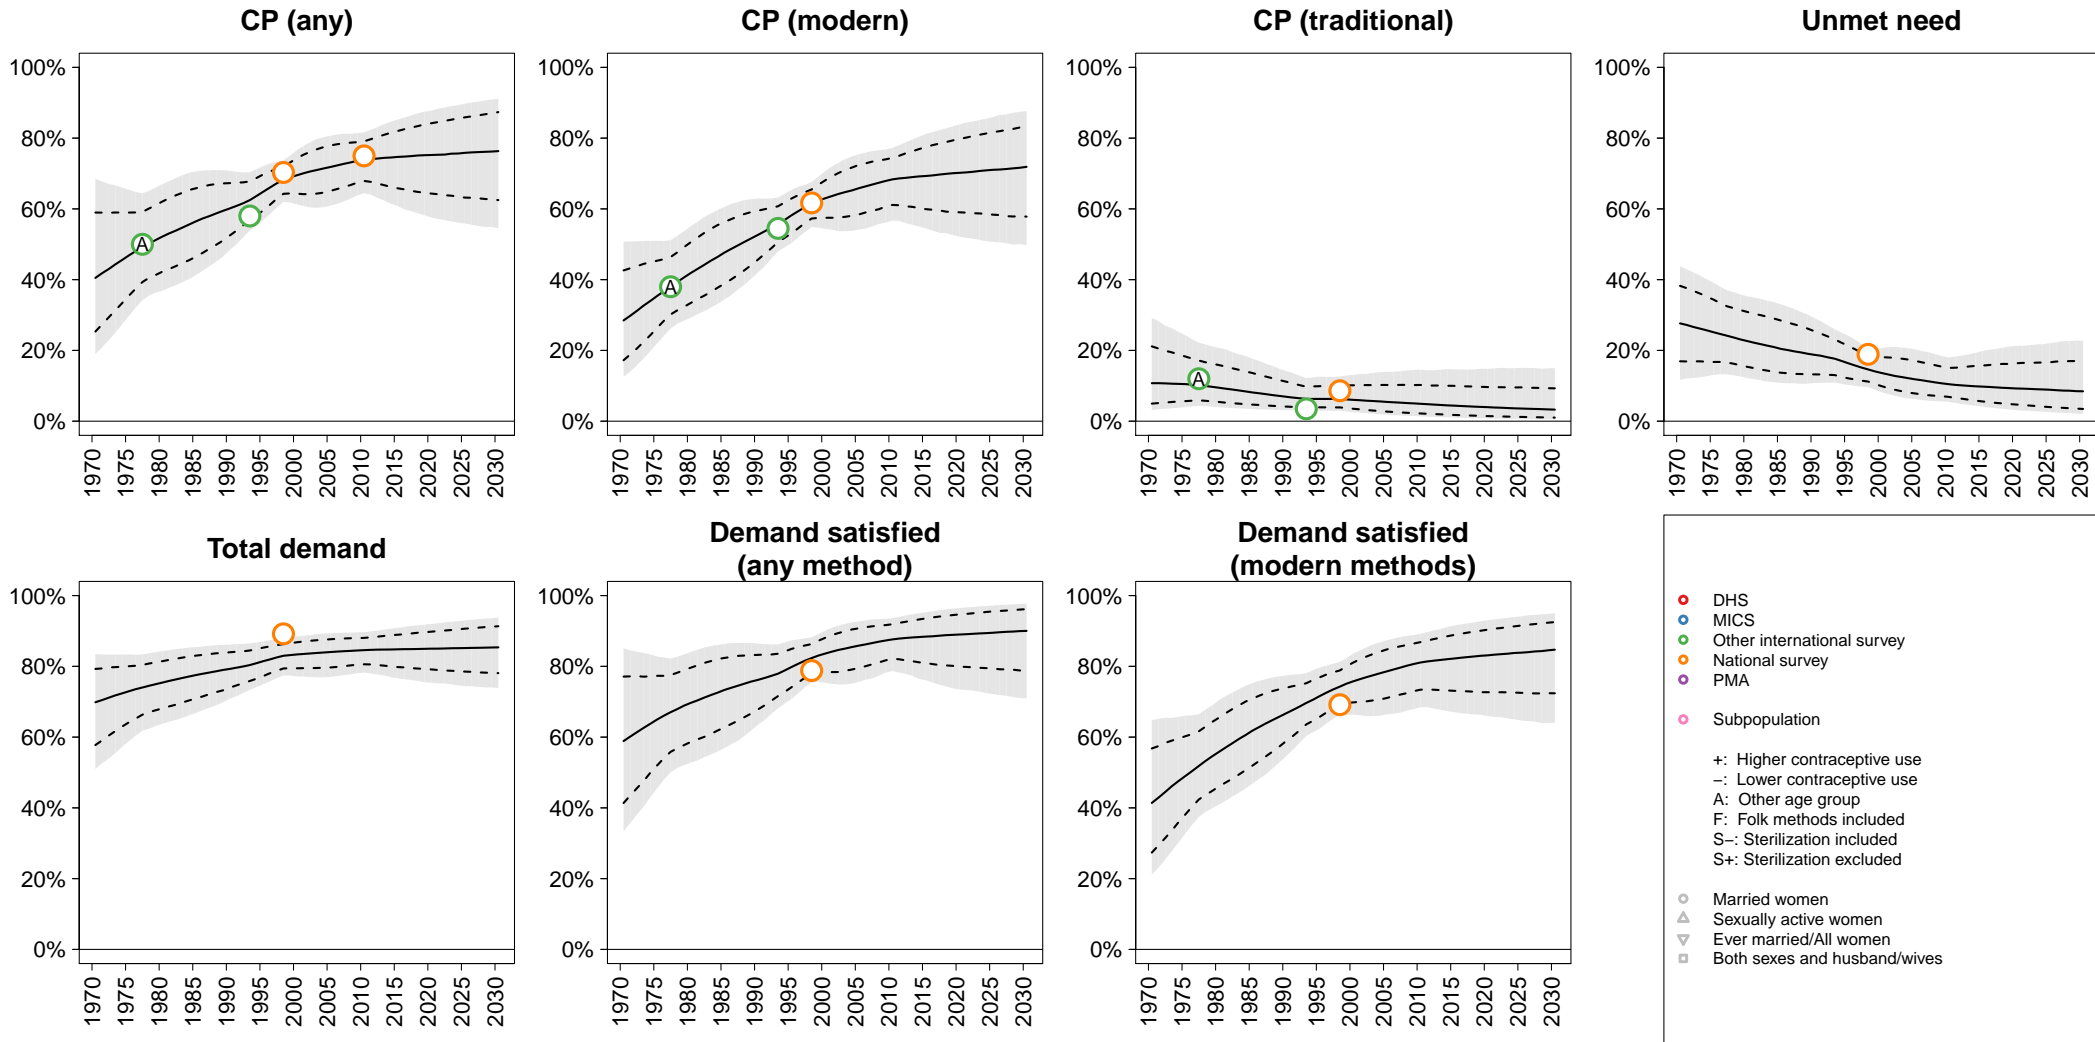

Viet Nam (South-eastern Asia) --- Married / In-Union

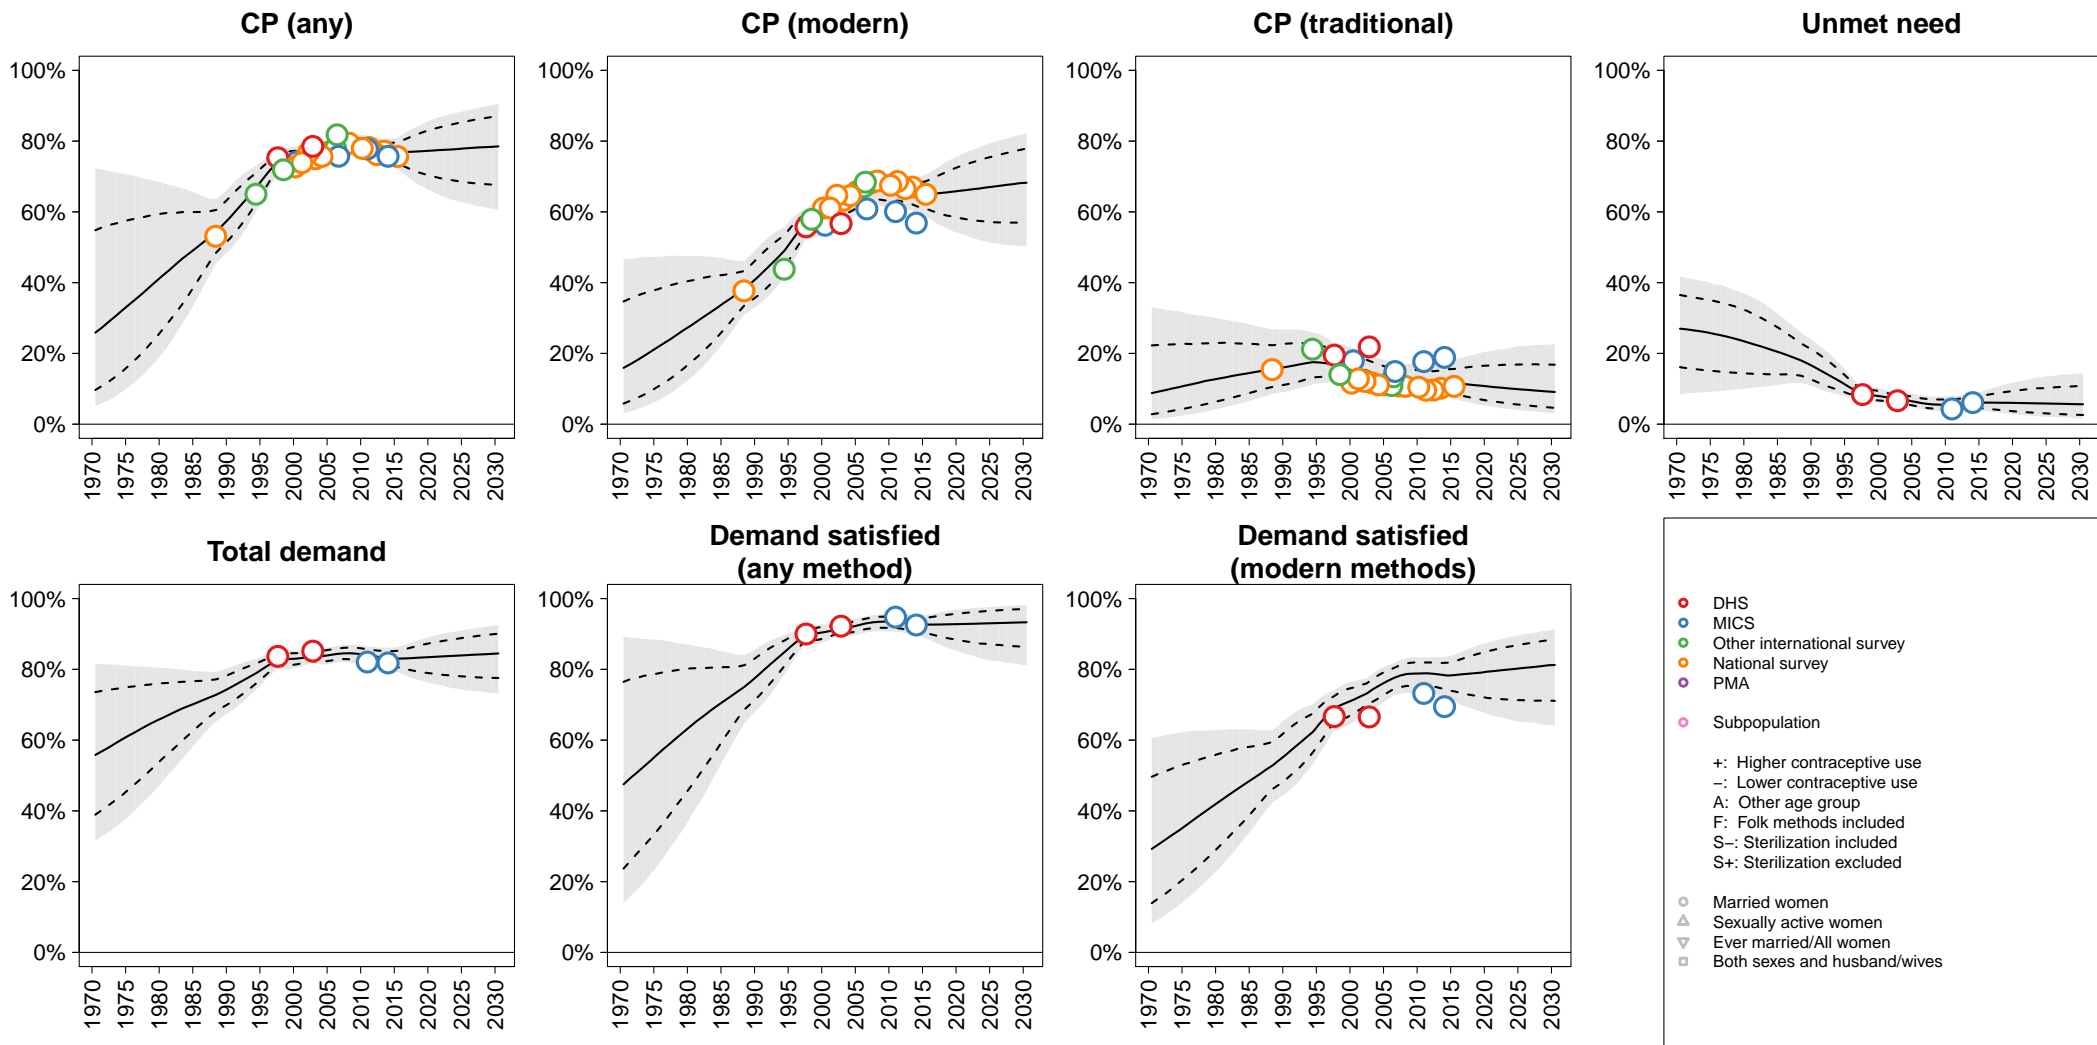

Yemen (Western Asia) --- Married / In-Union

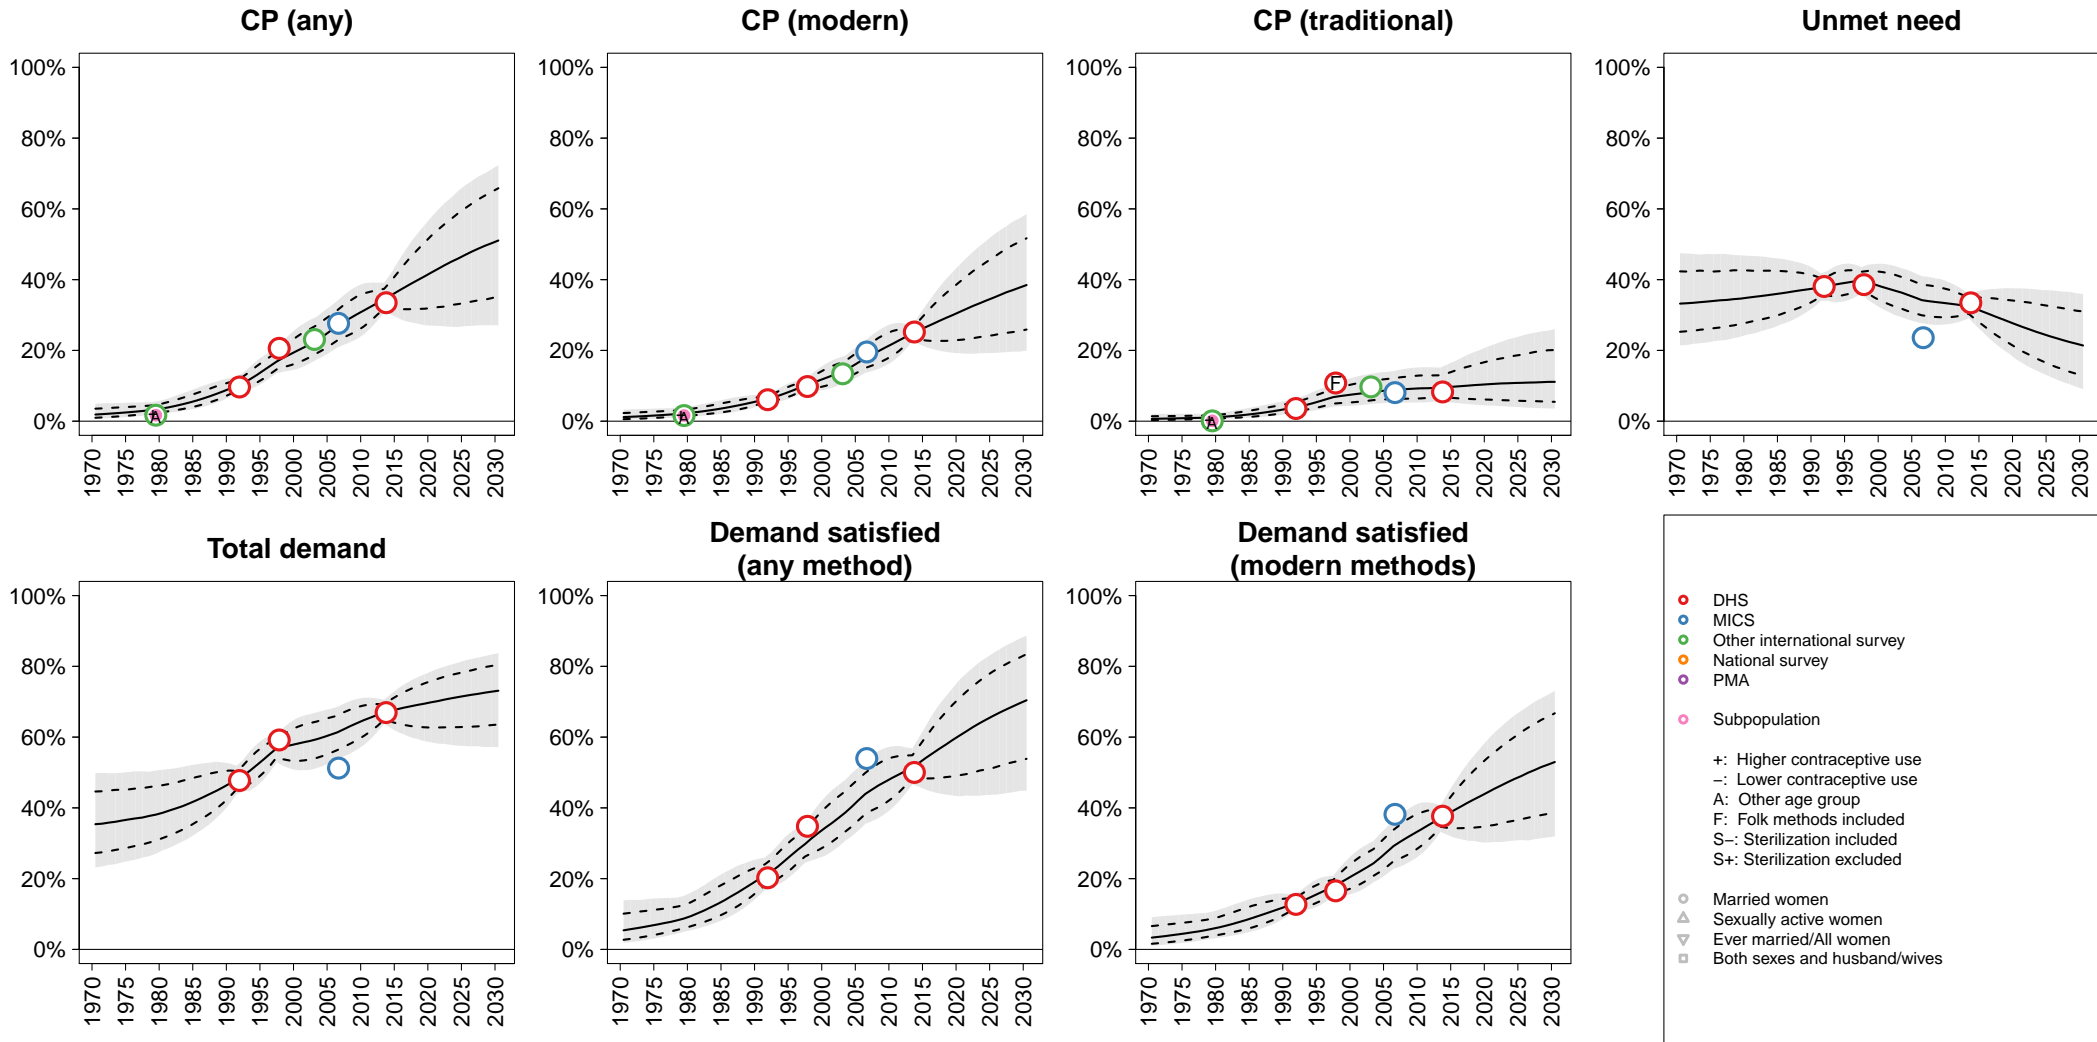

Zambia (Eastern Africa) --- Married / In-Union

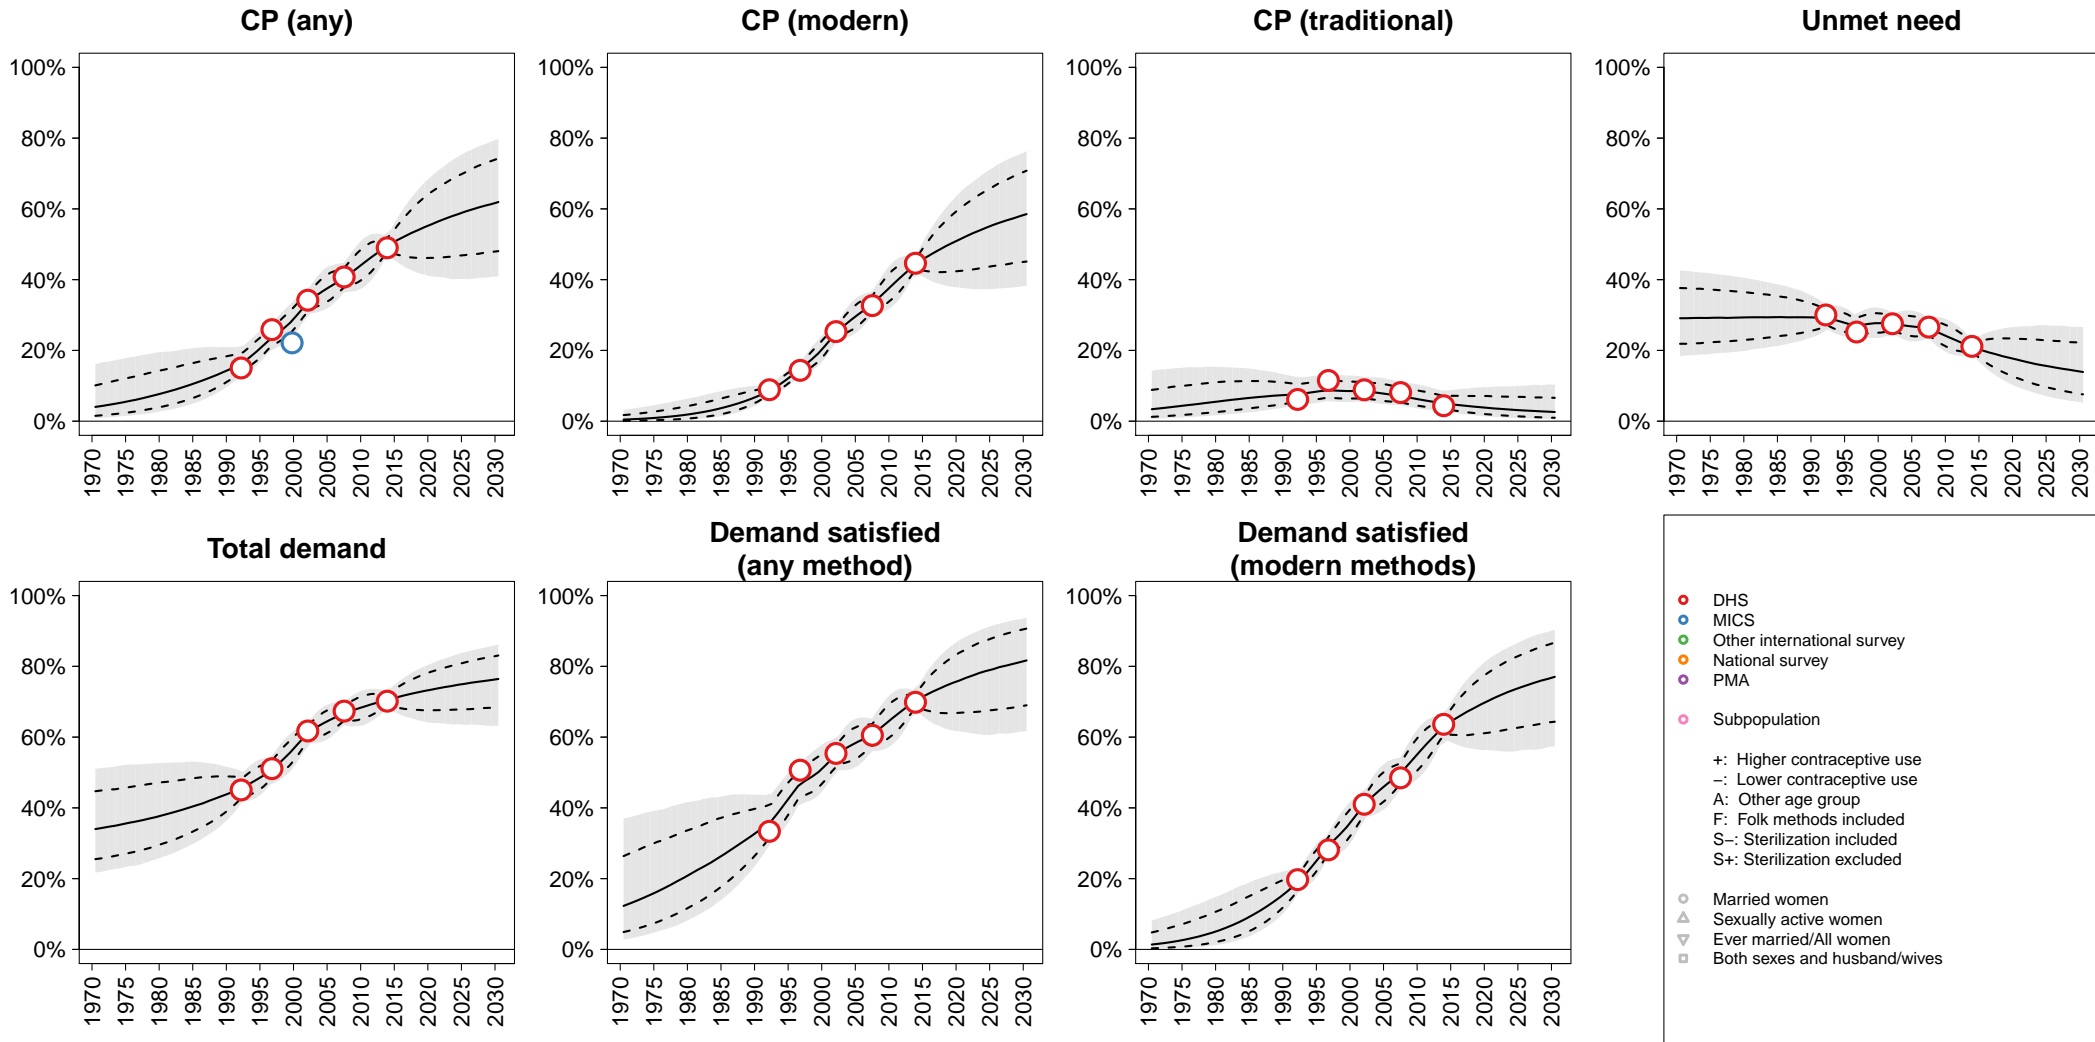

Zimbabwe (Eastern Africa) --- Married / In-Union

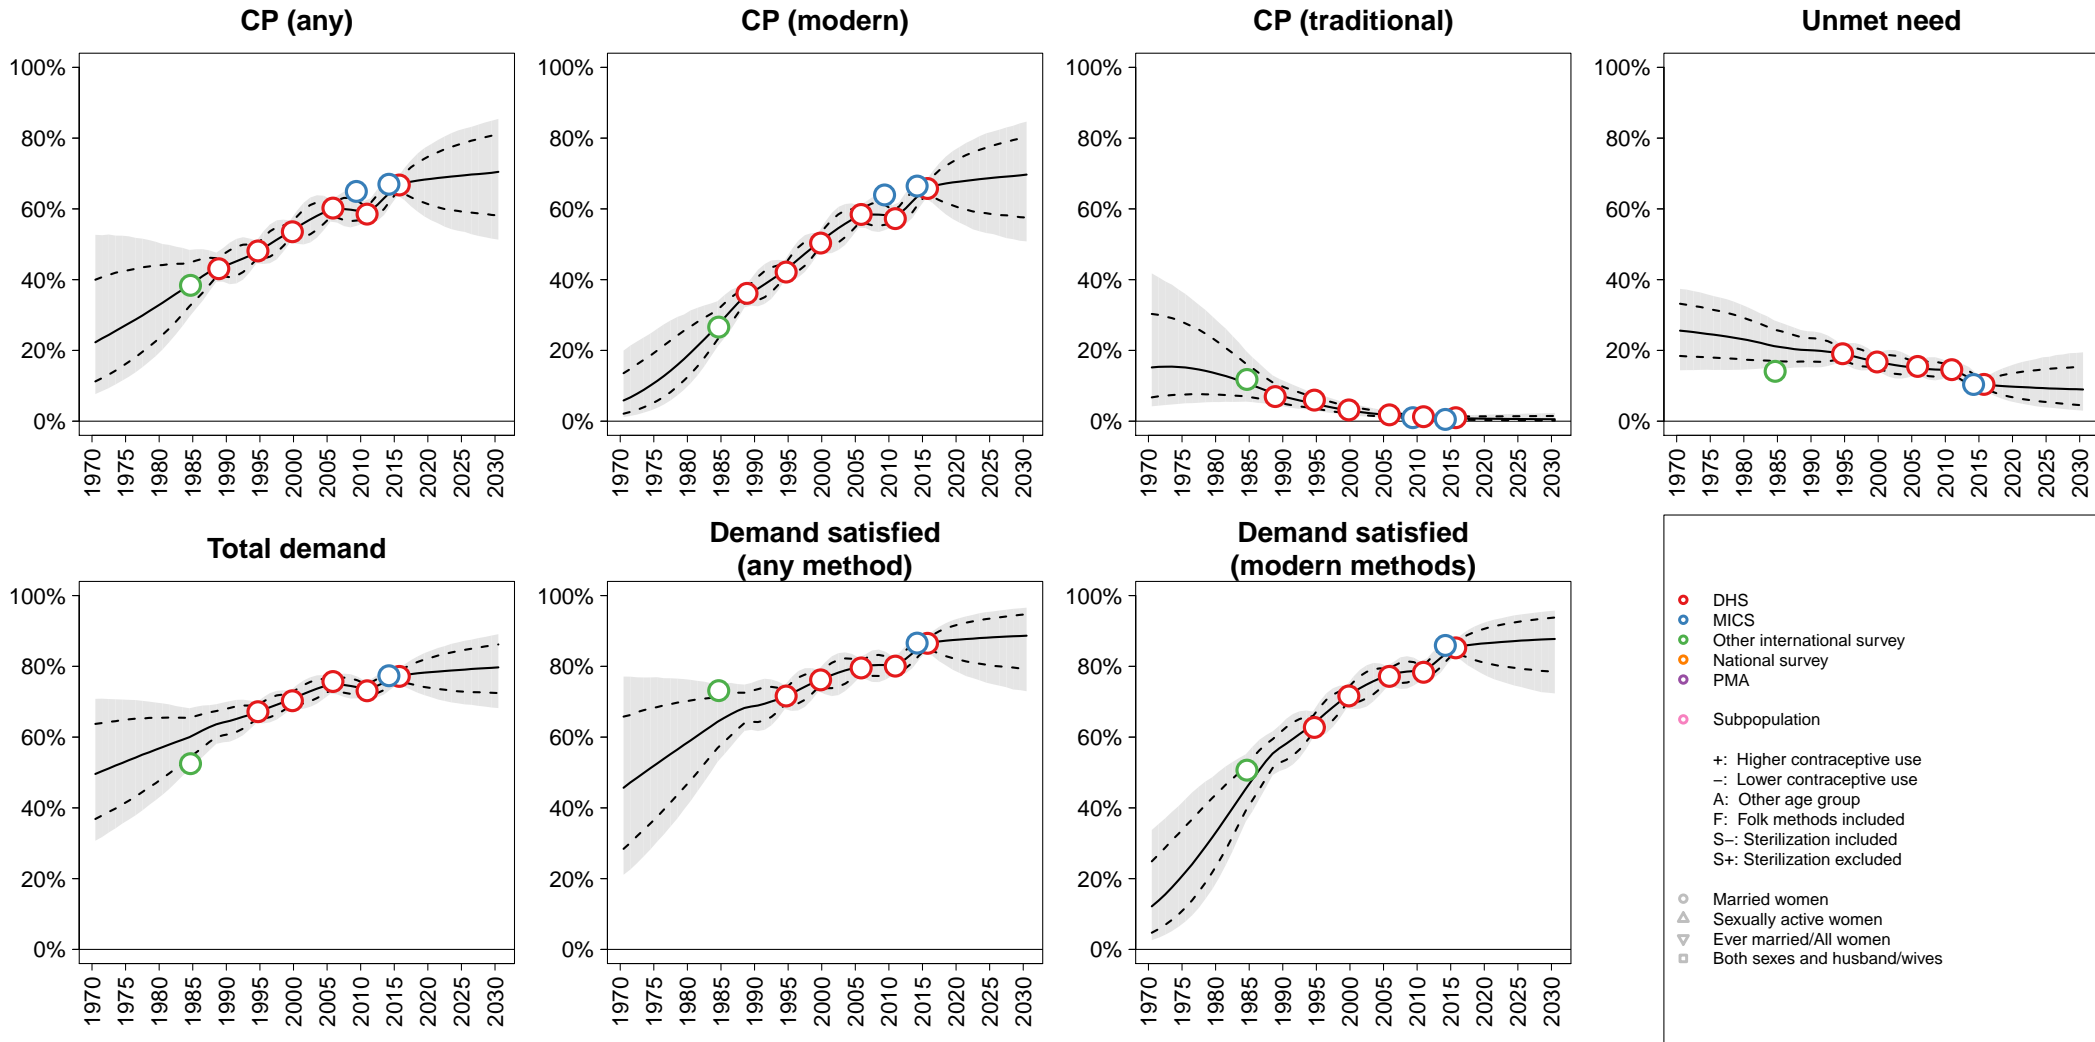



## 2.2 Country aggregates

World --- Married / In-Union

**CP (any)**

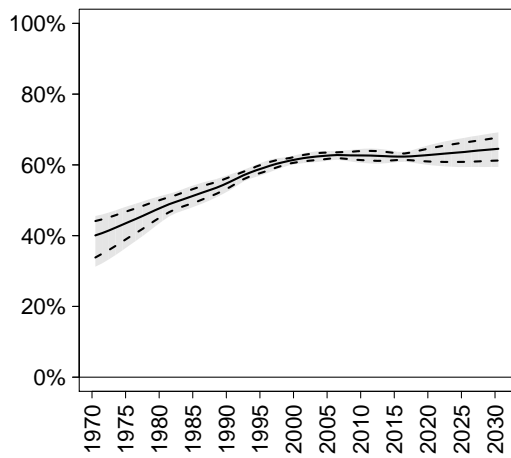

**CP (modern)**

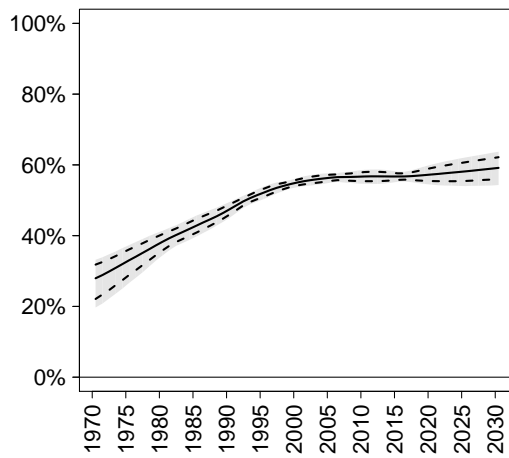

**CP (traditional)**

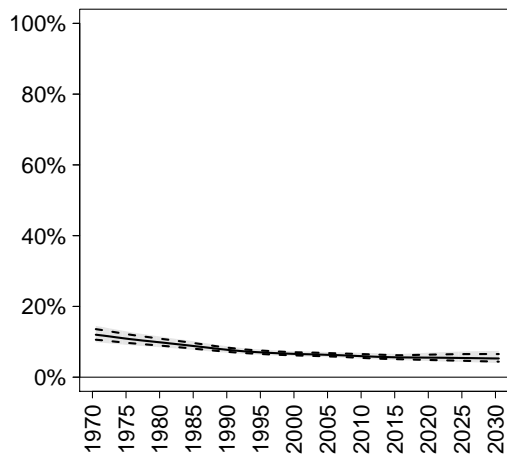

**Unmet need**

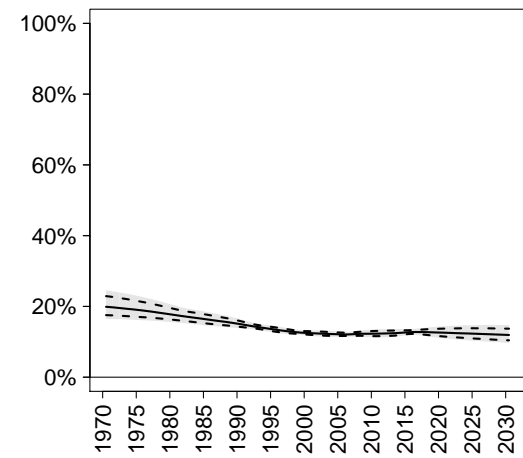

**Total demand**

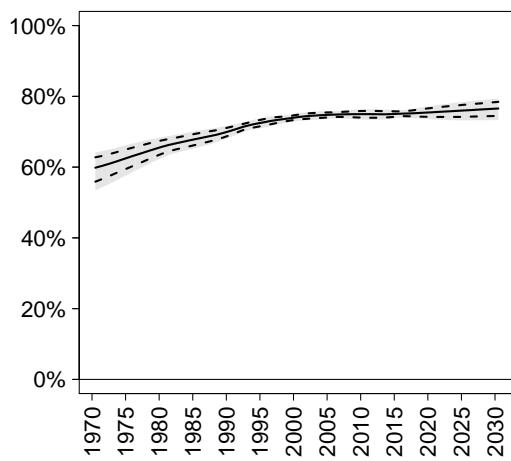

**Demand satisfied  
(any method)**

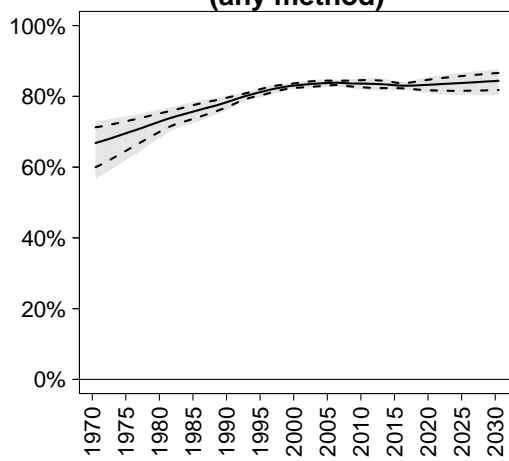

**Demand satisfied  
(modern methods)**

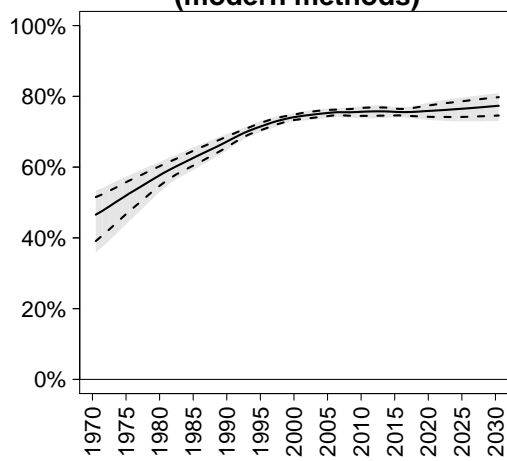

High-income countries --- Married / In-Union

**CP (any)**

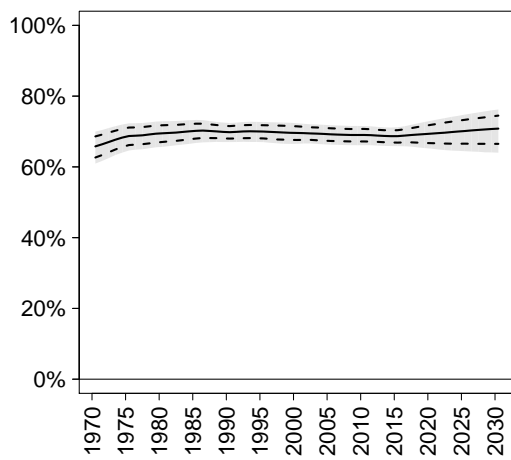

**CP (modern)**

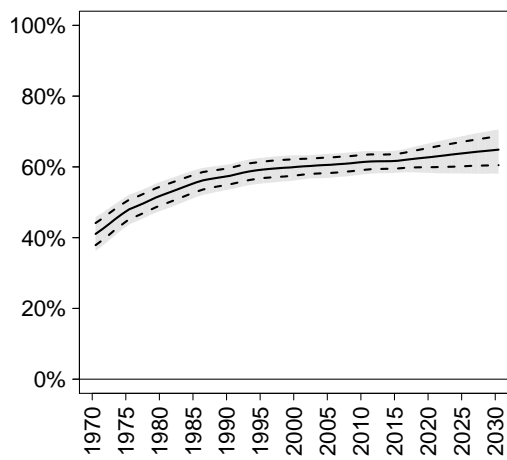

**CP (traditional)**

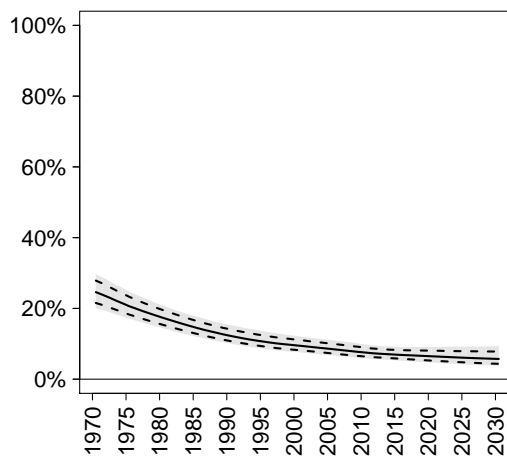

**Unmet need**

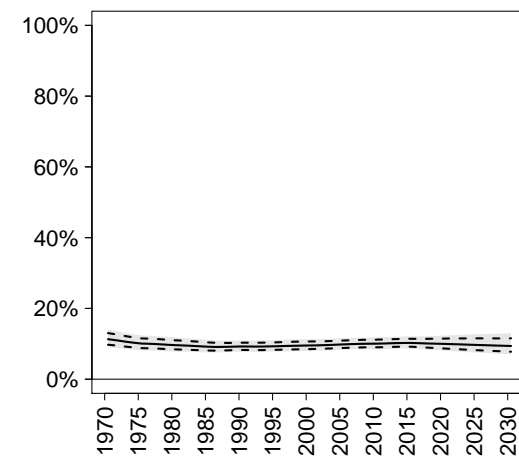

**Total demand**

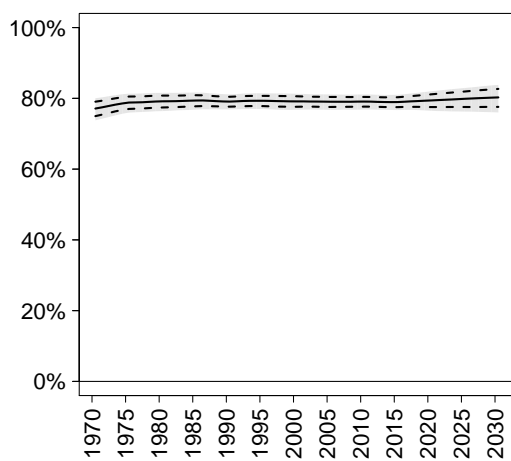

**Demand satisfied  
(any method)**

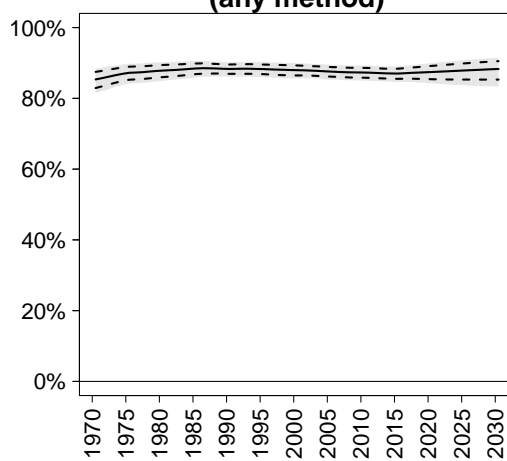

**Demand satisfied  
(modern methods)**

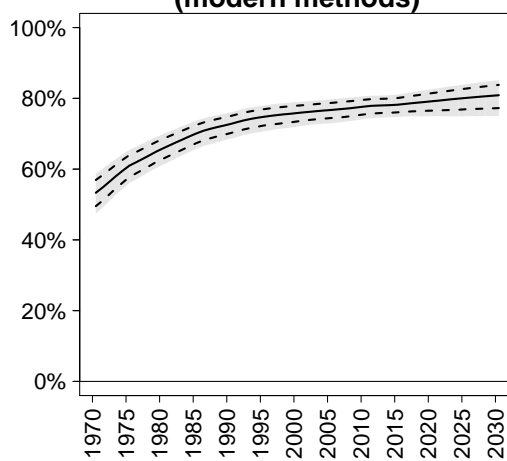

Upper-middle-income countries --- Married / In-Union

**CP (any)**

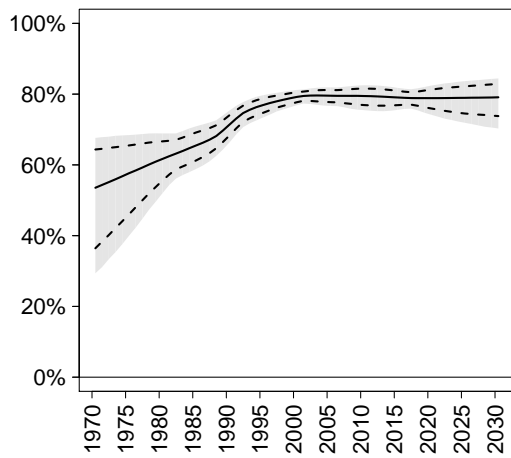

**CP (modern)**

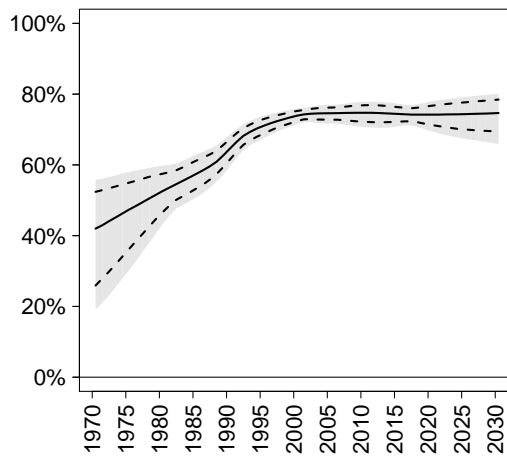

**CP (traditional)**

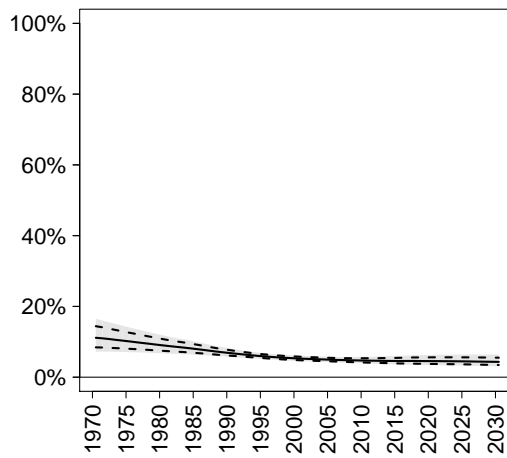

**Unmet need**

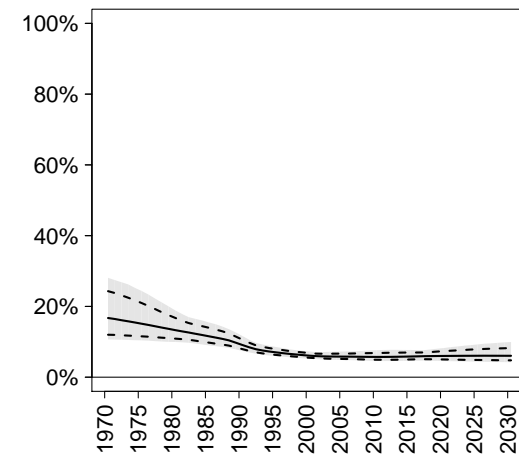

**Total demand**

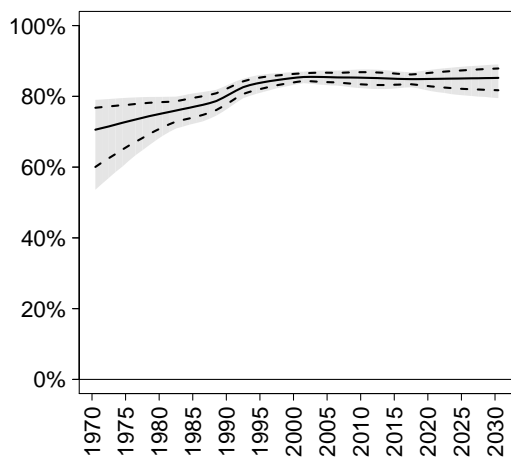

**Demand satisfied  
(any method)**

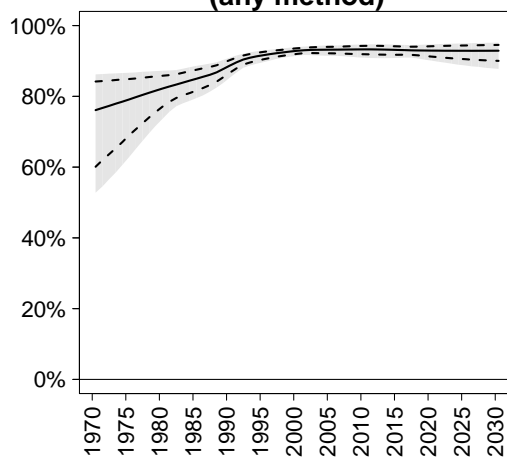

**Demand satisfied  
(modern methods)**

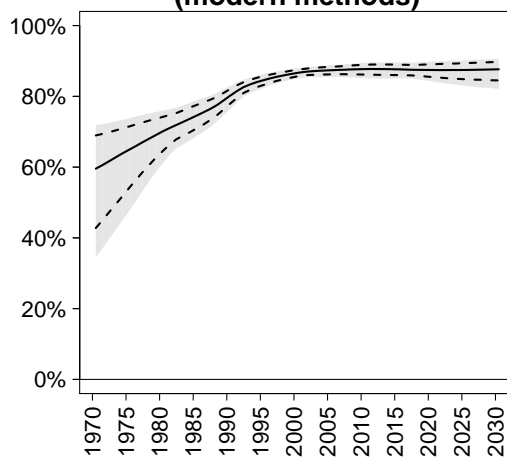

Lower-middle-income countries --- Married / In-Union

**CP (any)**

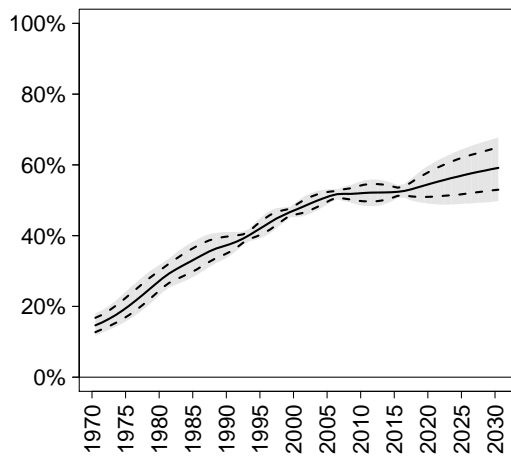

**CP (modern)**

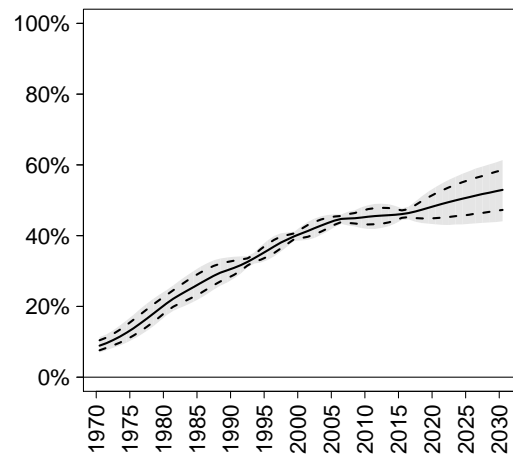

**CP (traditional)**

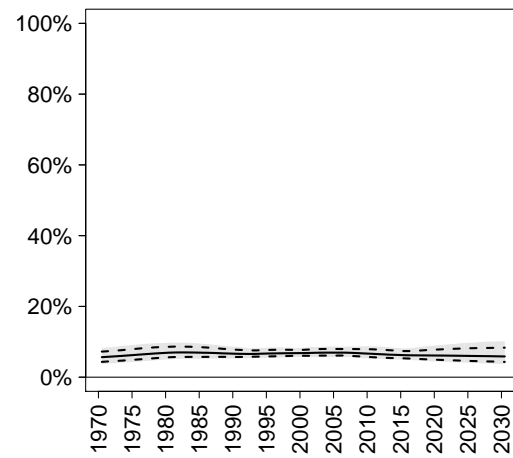

**Unmet need**

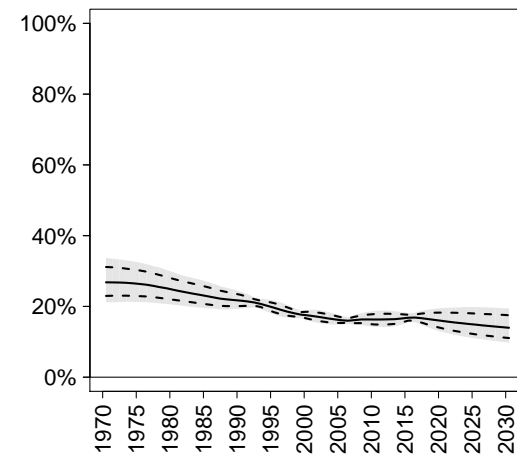

**Total demand**

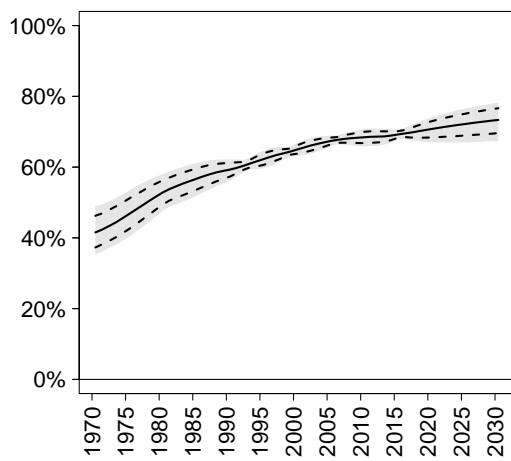

**Demand satisfied  
(any method)**

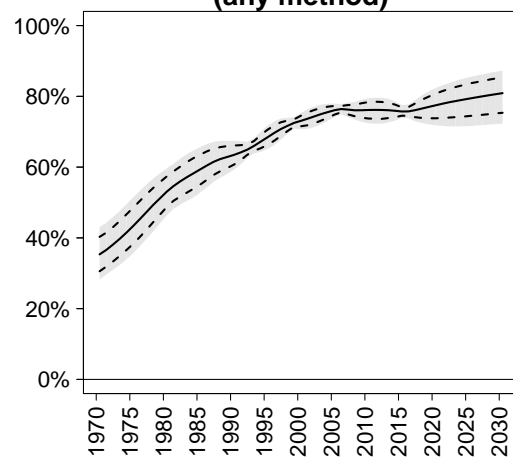

**Demand satisfied  
(modern methods)**

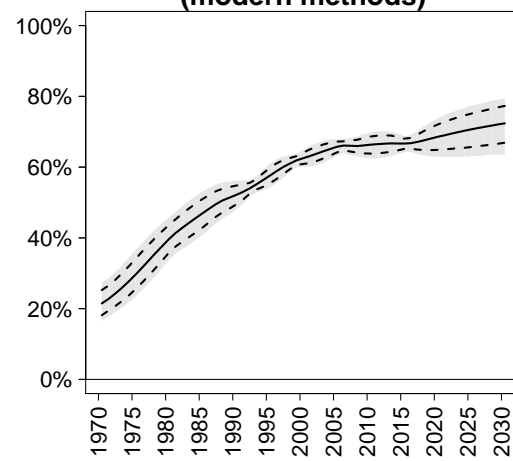

Low-income countries --- Married / In-Union

**CP (any)**

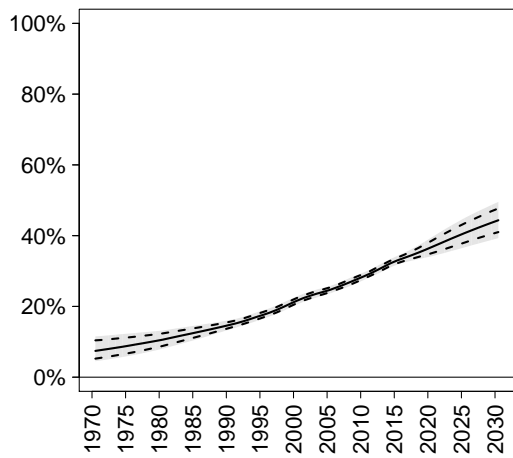

**CP (modern)**

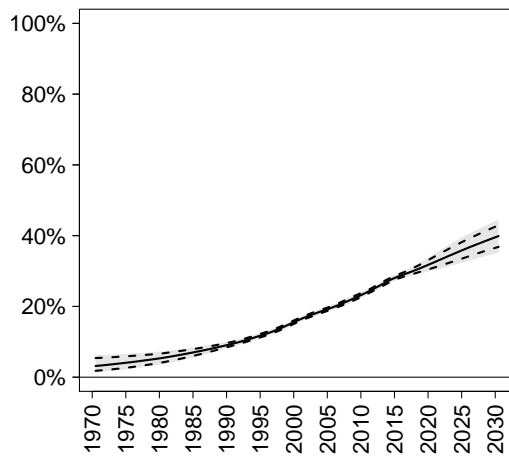

**CP (traditional)**

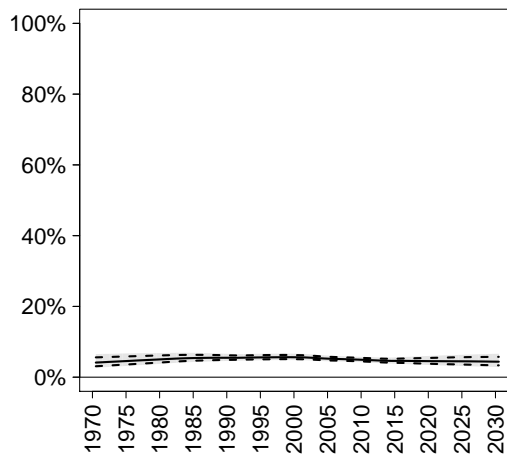

**Unmet need**

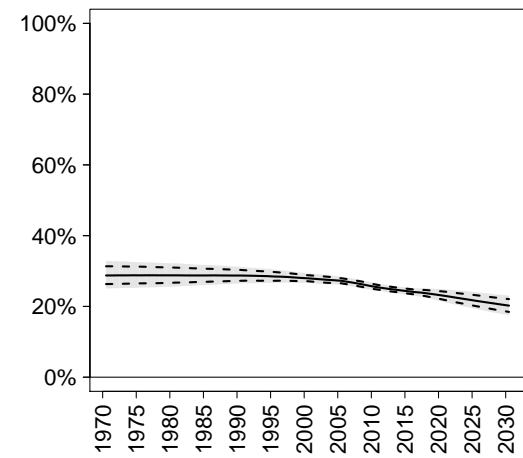

**Total demand**

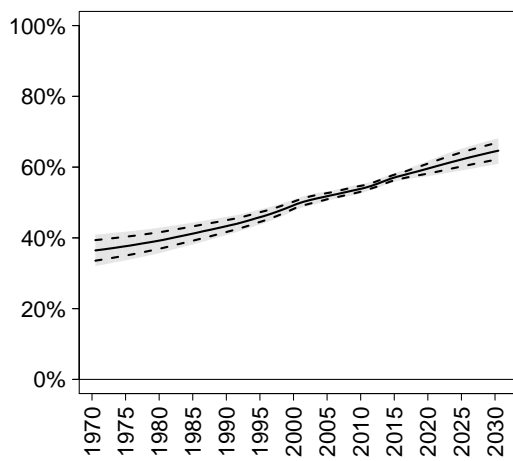

**Demand satisfied  
(any method)**

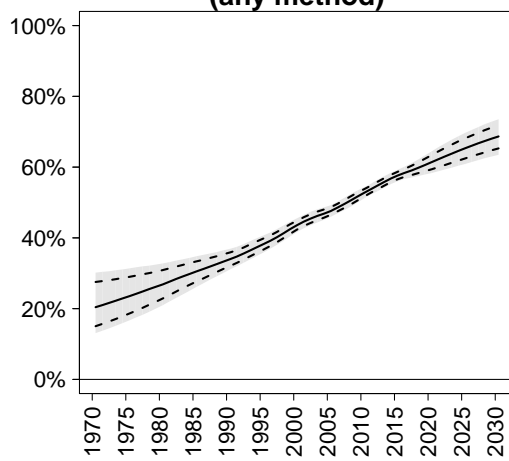

**Demand satisfied  
(modern methods)**

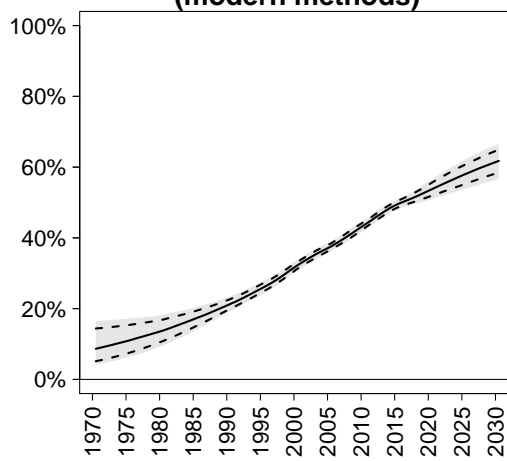

Africa --- Married / In-Union

**CP (any)**

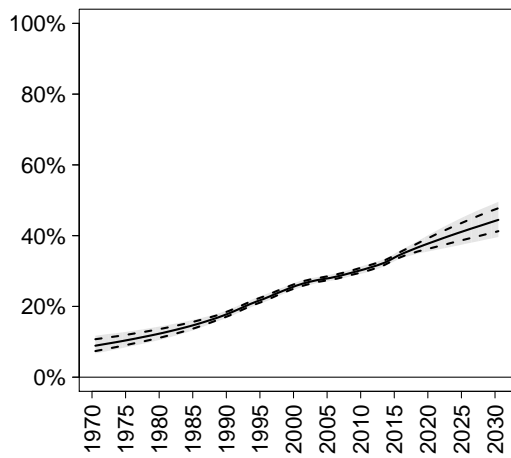

**CP (modern)**

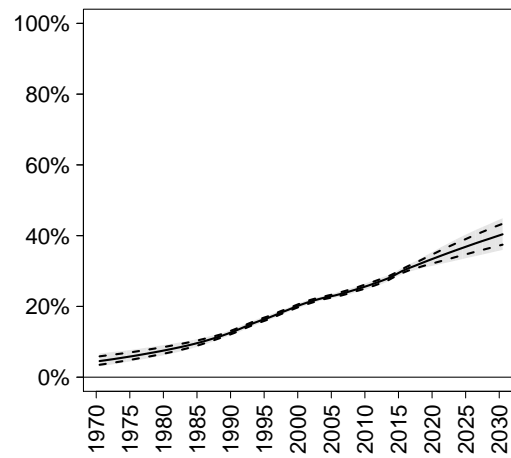

**CP (traditional)**

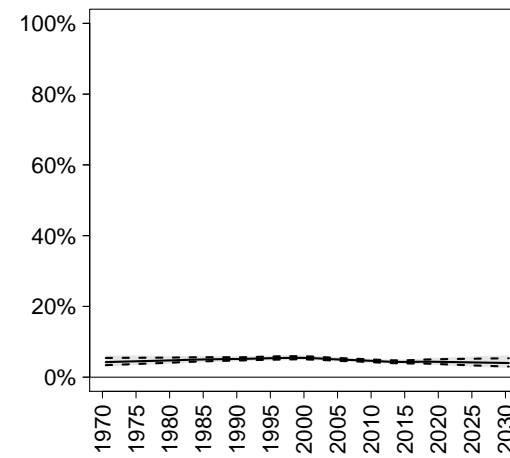

**Unmet need**

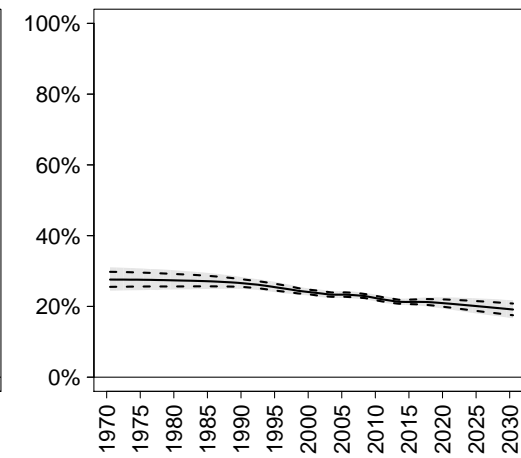

**Total demand**

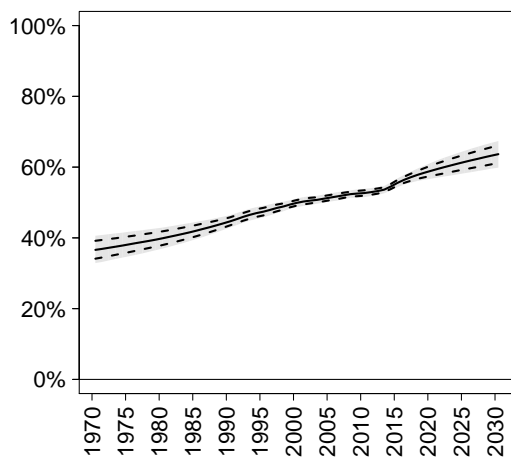

**Demand satisfied  
(any method)**

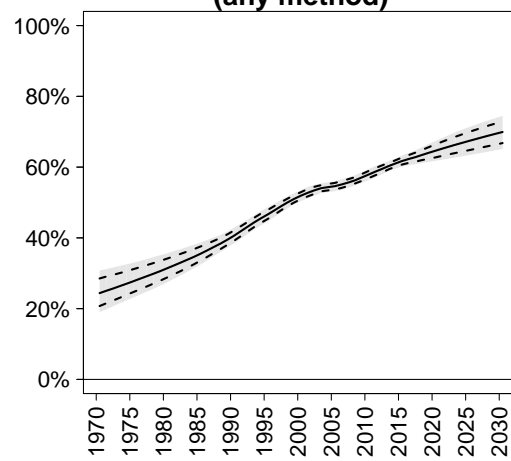

**Demand satisfied  
(modern methods)**

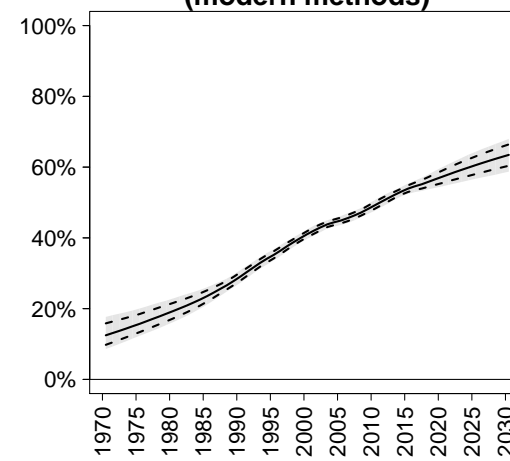

Eastern Africa --- Married / In-Union

**CP (any)**

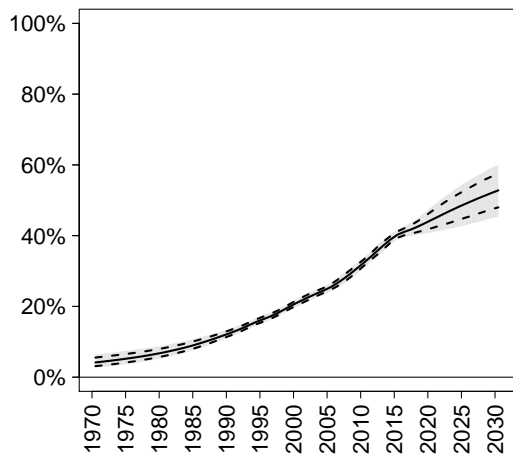

**CP (modern)**

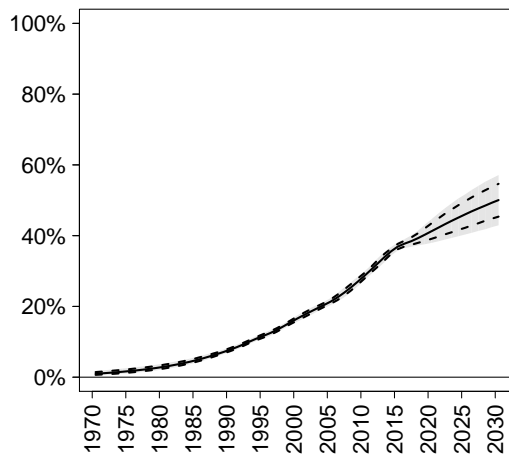

**CP (traditional)**

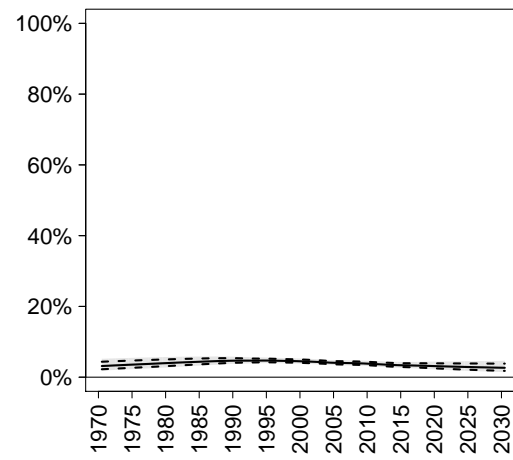

**Unmet need**

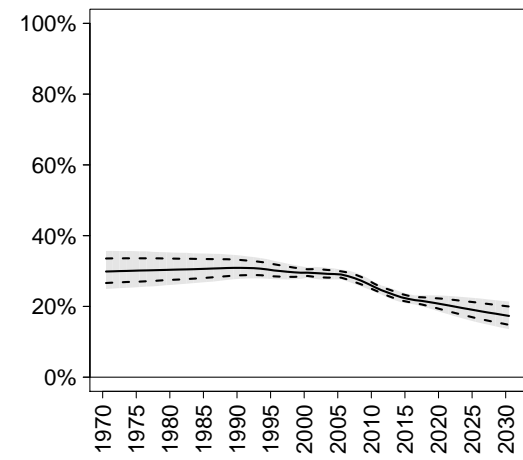

**Total demand**

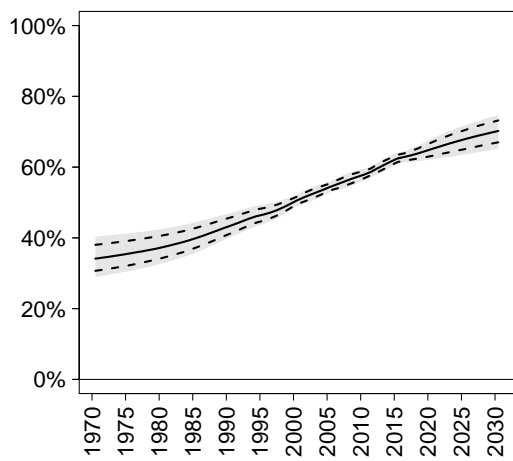

**Demand satisfied  
(any method)**

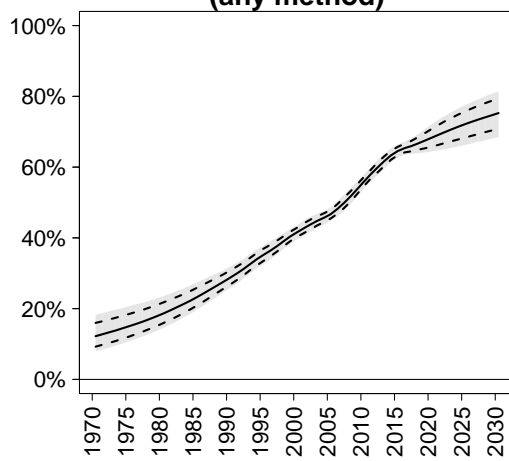

**Demand satisfied  
(modern methods)**

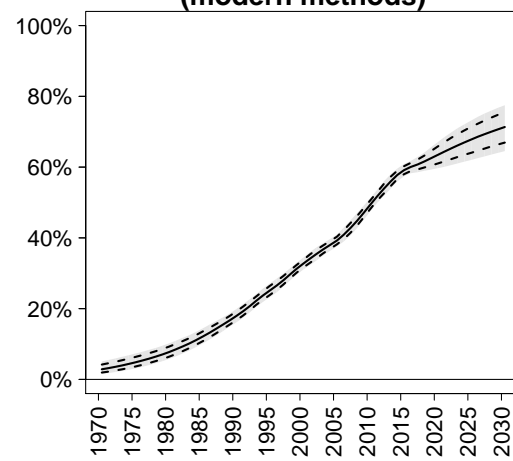



Middle Africa --- Married / In-Union

**CP (any)**

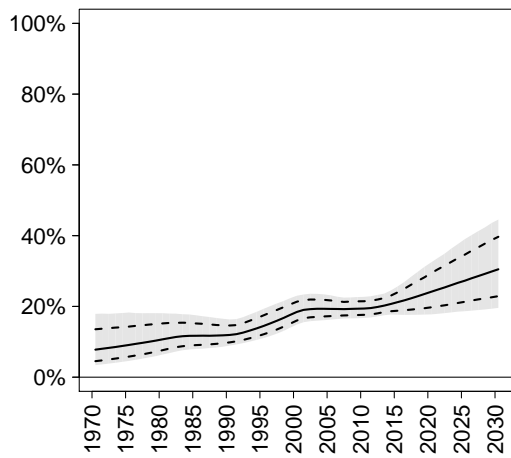

**CP (modern)**

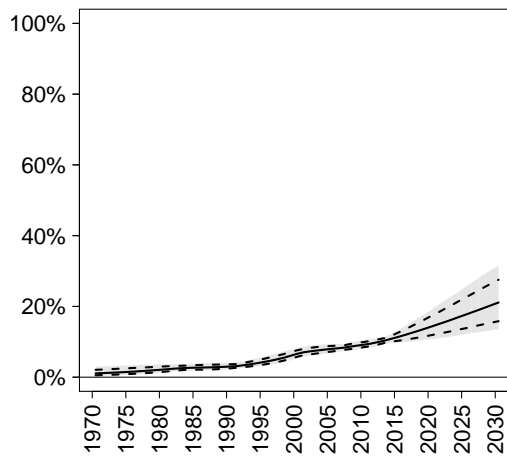

**CP (traditional)**

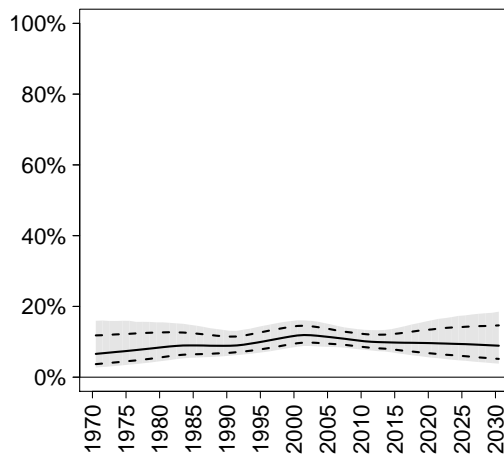

**Unmet need**

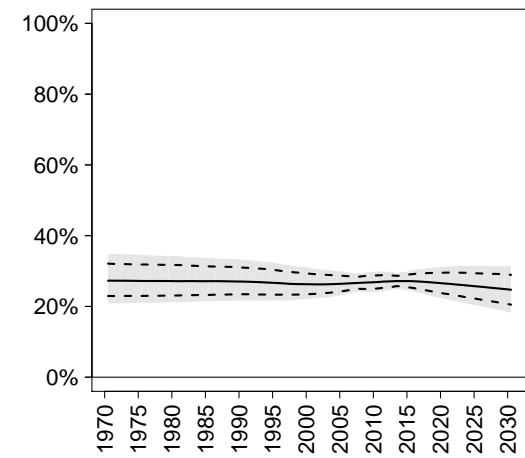

**Total demand**

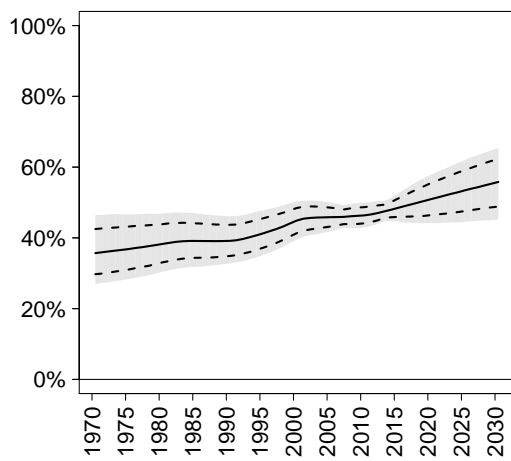

**Demand satisfied  
(any method)**

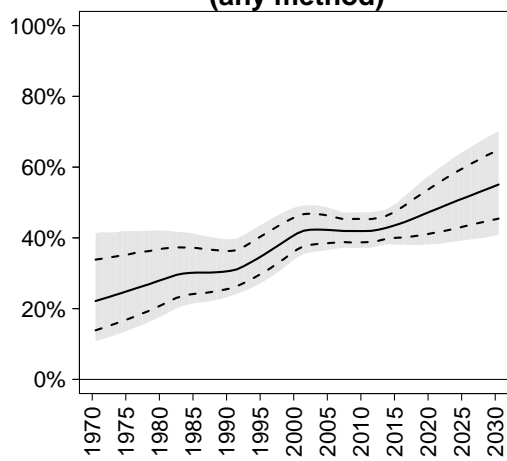

**Demand satisfied  
(modern methods)**

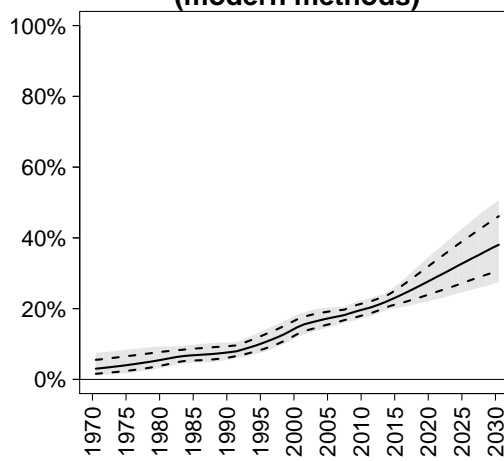

Northern Africa --- Married / In-Union

**CP (any)**

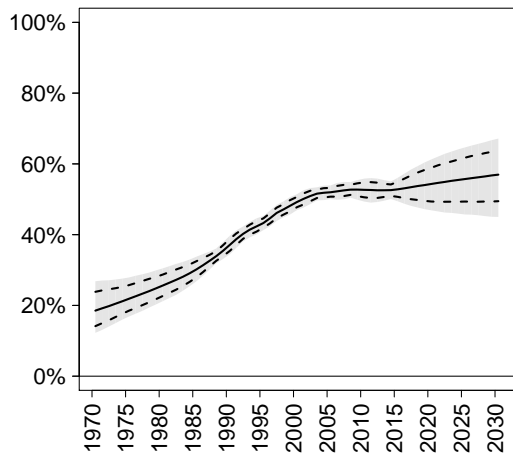

**CP (modern)**

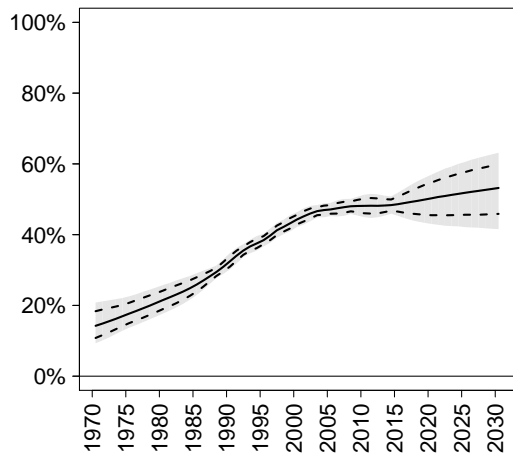

**CP (traditional)**

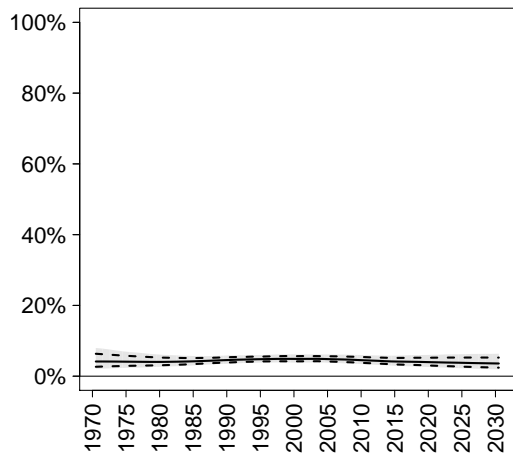

**Unmet need**

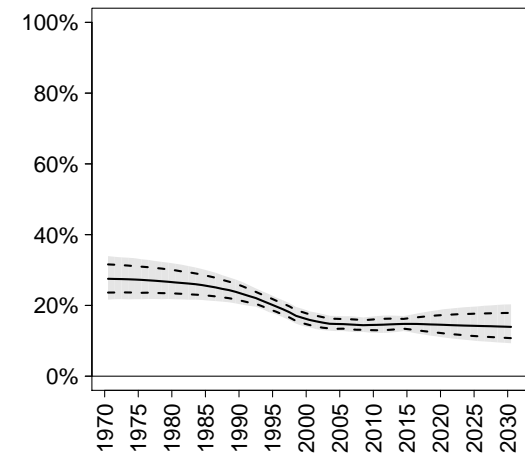

**Total demand**

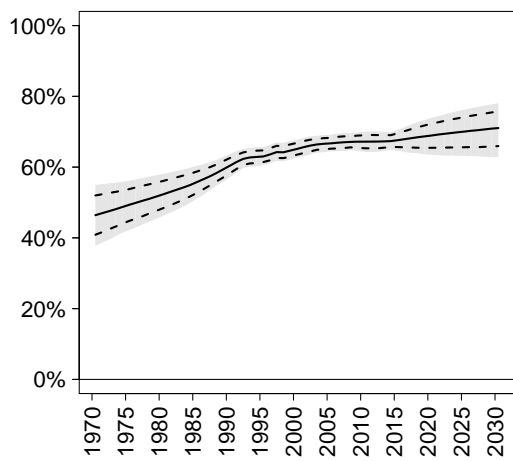

**Demand satisfied  
(any method)**

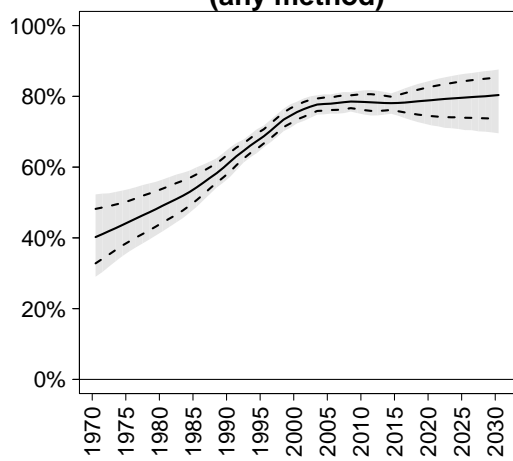

**Demand satisfied  
(modern methods)**

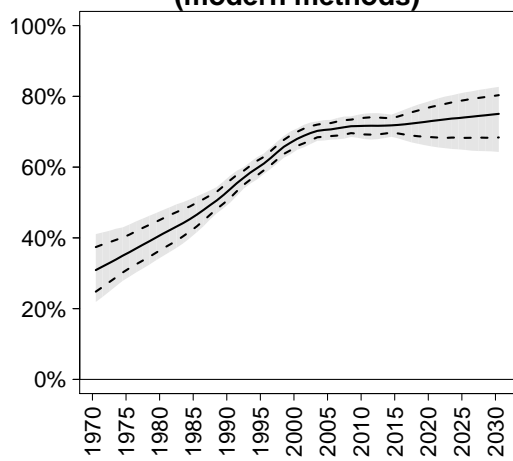

Southern Africa --- Married / In-Union

**CP (any)**

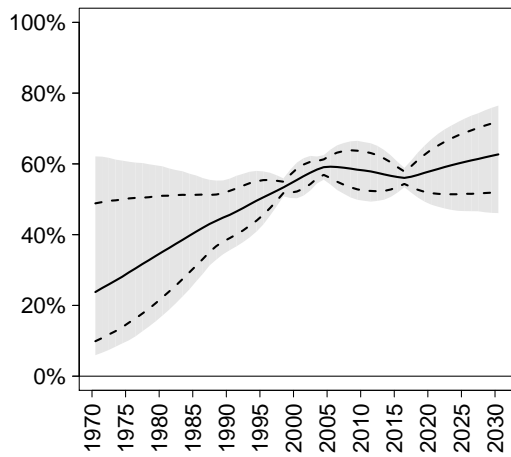

**CP (modern)**

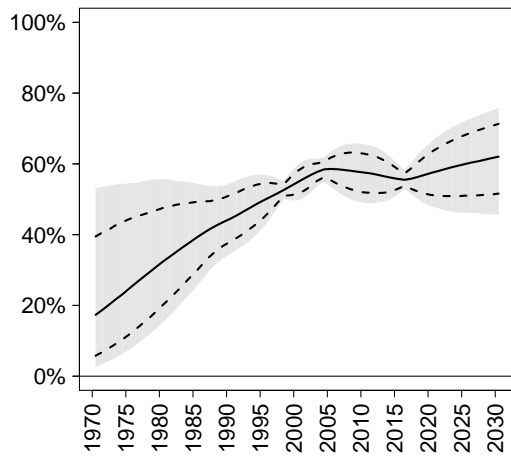

**CP (traditional)**

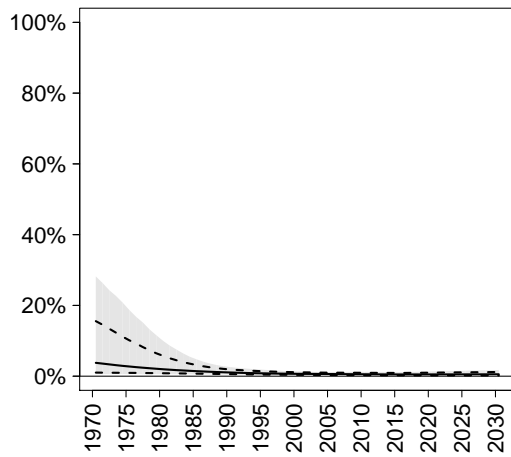

**Unmet need**

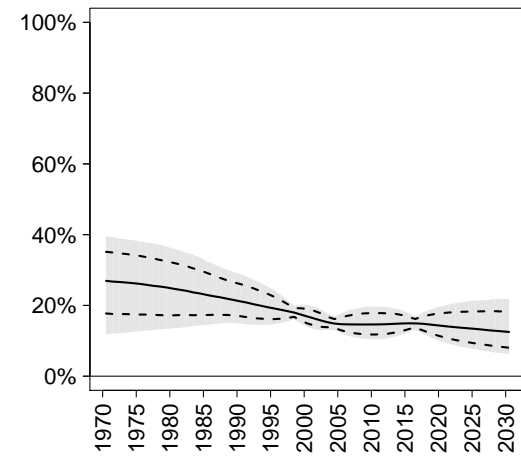

**Total demand**

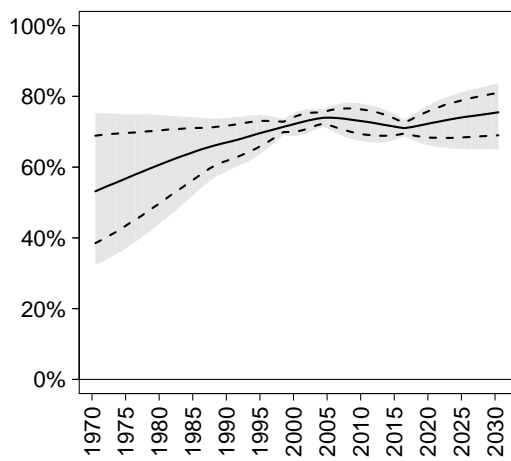

**Demand satisfied (any method)**

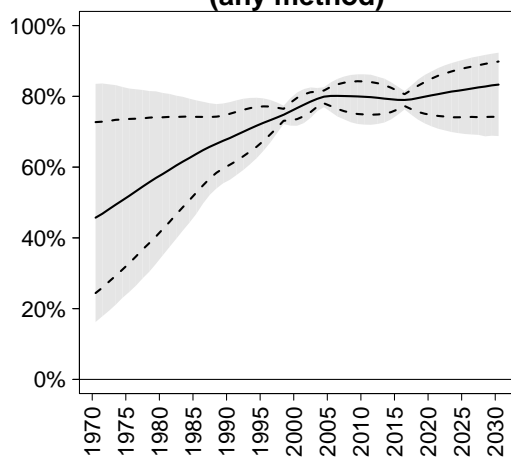

**Demand satisfied (modern methods)**

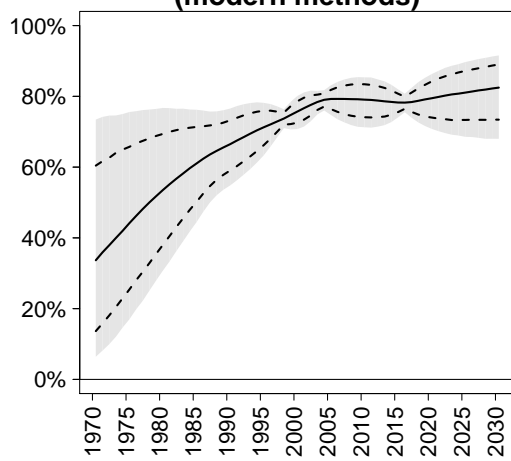

Western Africa --- Married / In-Union

**CP (any)**

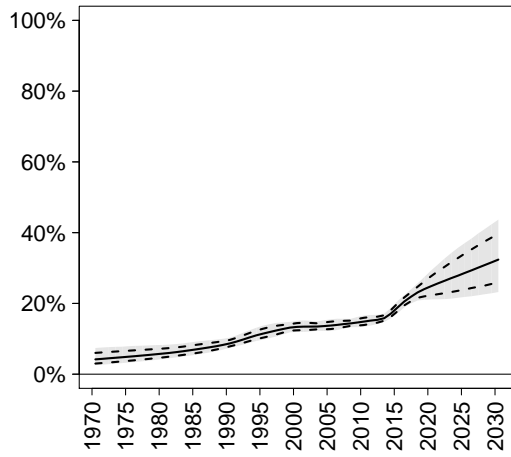

**CP (modern)**

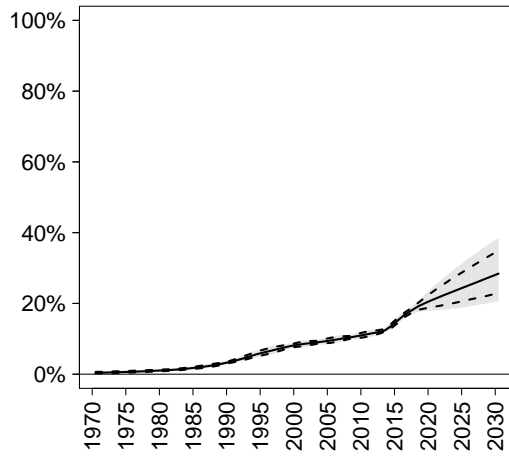

**CP (traditional)**

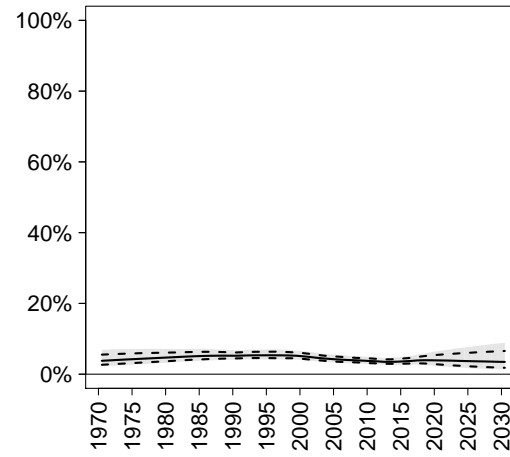

**Unmet need**

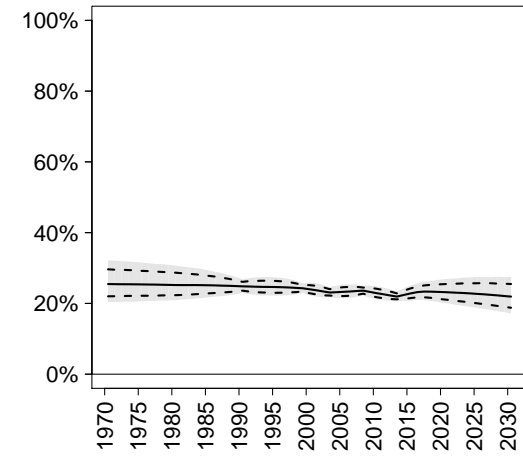

**Total demand**

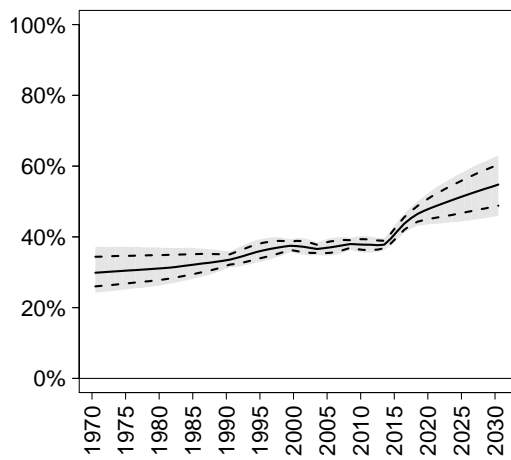

**Demand satisfied  
(any method)**

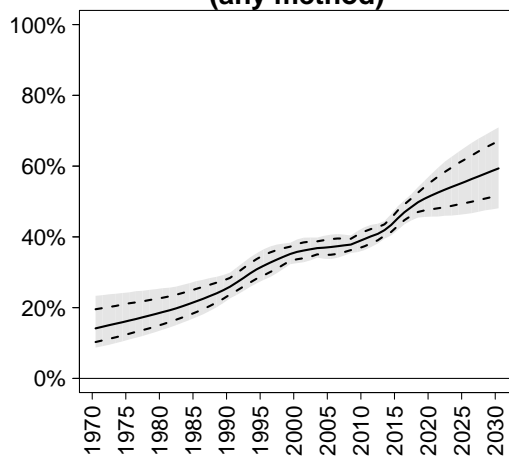

**Demand satisfied  
(modern methods)**

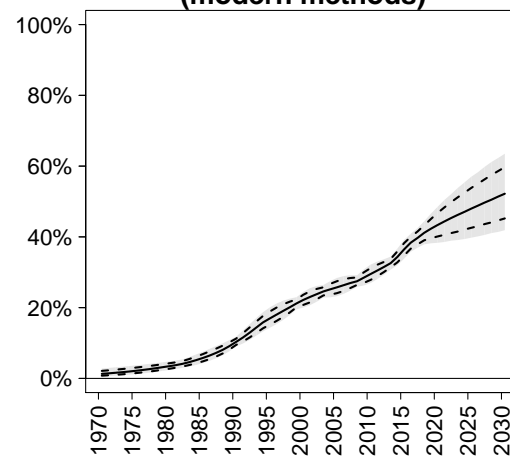

Asia --- Married / In-Union

**CP (any)**

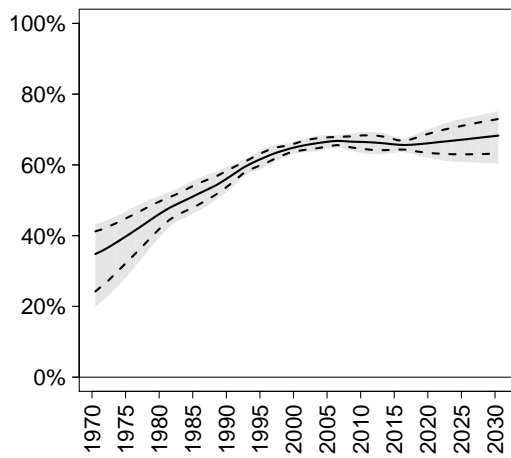

**CP (modern)**

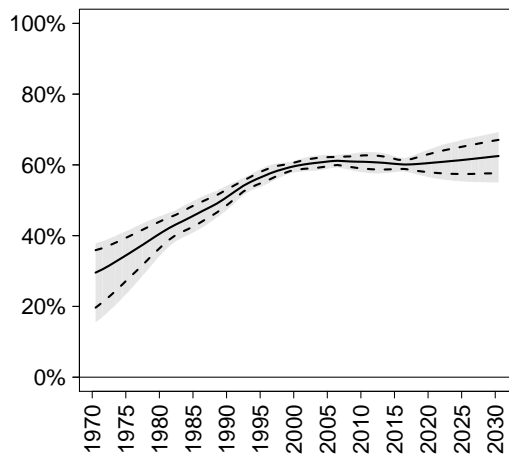

**CP (traditional)**

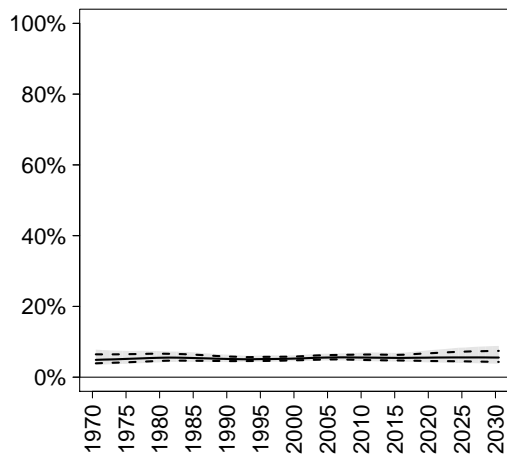

**Unmet need**

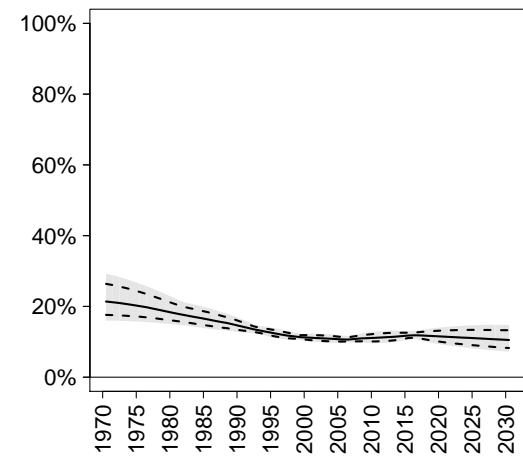

**Total demand**

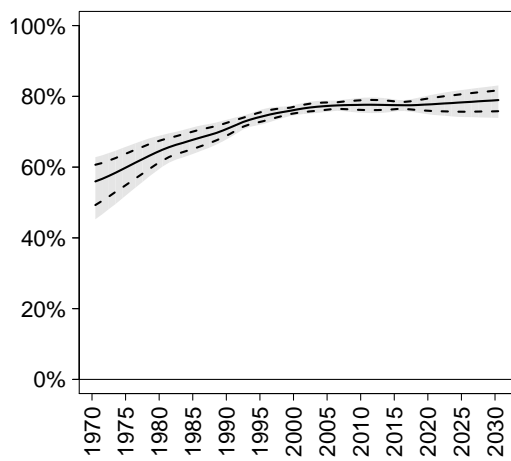

**Demand satisfied  
(any method)**

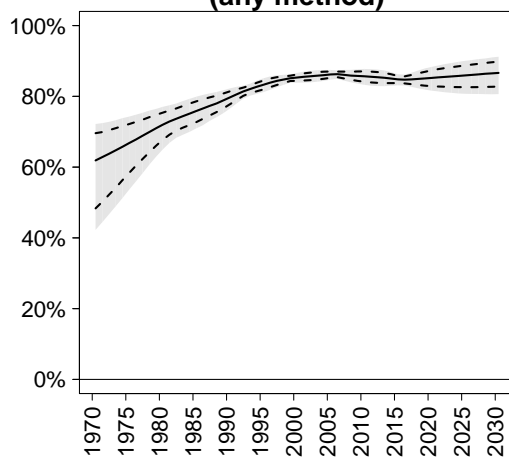

**Demand satisfied  
(modern methods)**

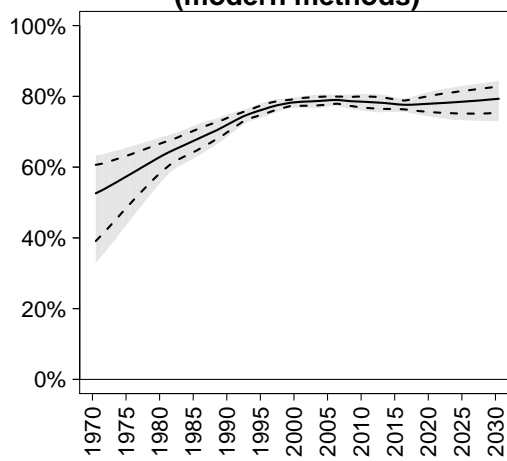

Central Asia --- Married / In-Union

**CP (any)**

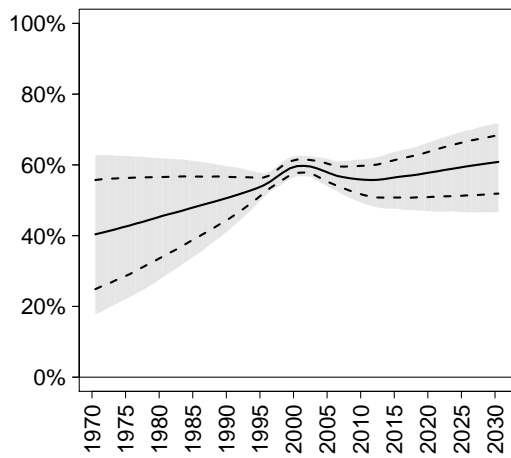

**CP (modern)**

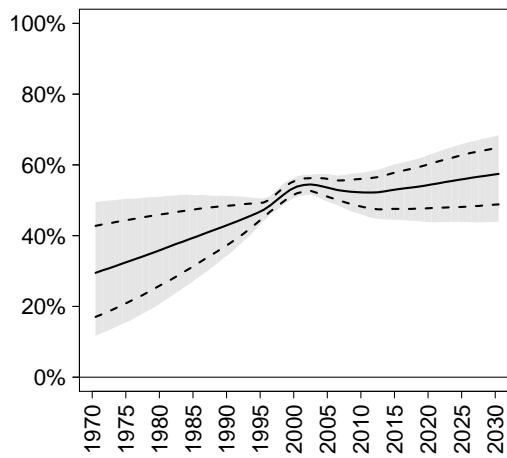

**CP (traditional)**

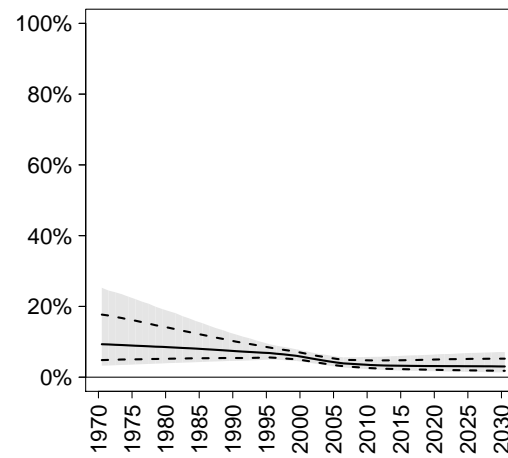

**Unmet need**

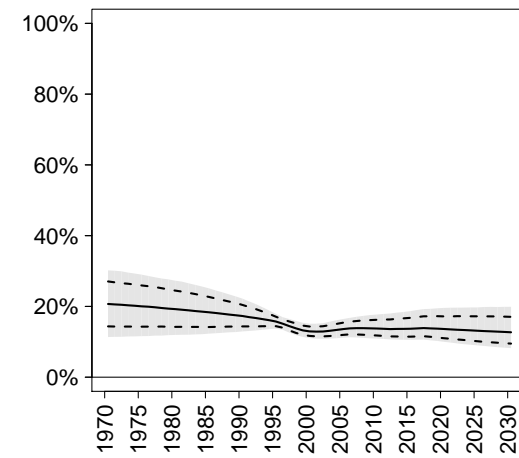

**Total demand**

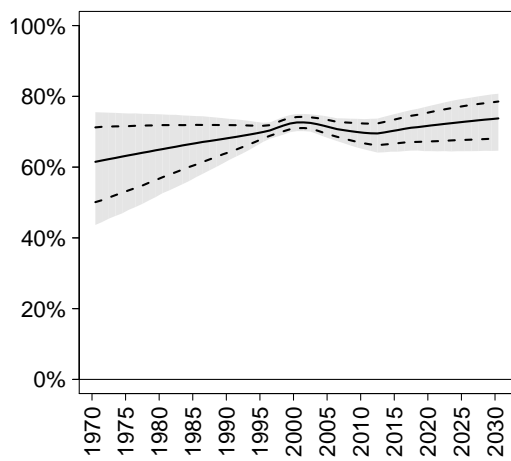

**Demand satisfied (any method)**

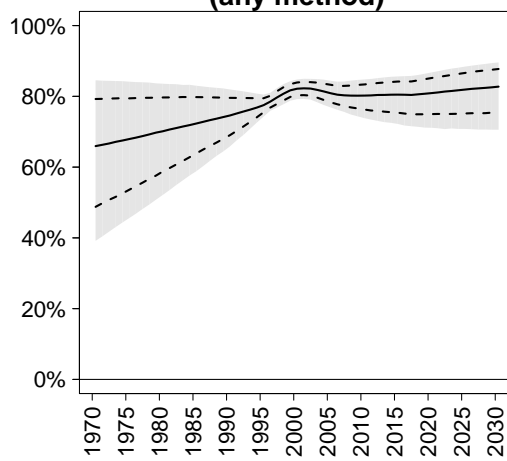

**Demand satisfied (modern methods)**

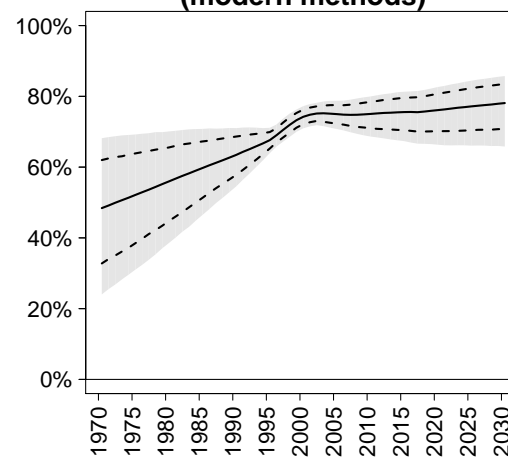

Eastern Asia --- Married / In-Union

**CP (any)**

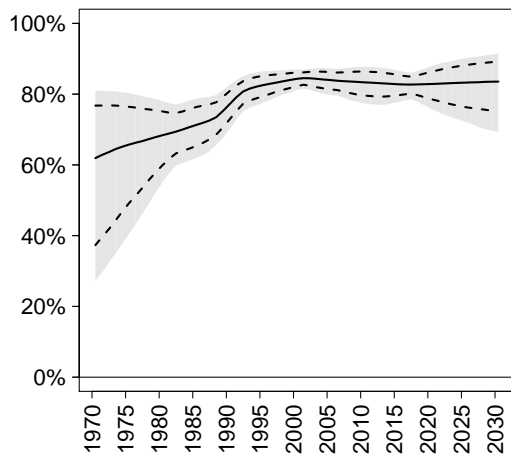

**CP (modern)**

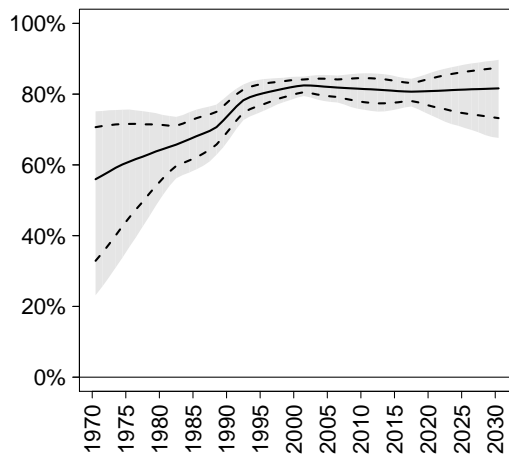

**CP (traditional)**

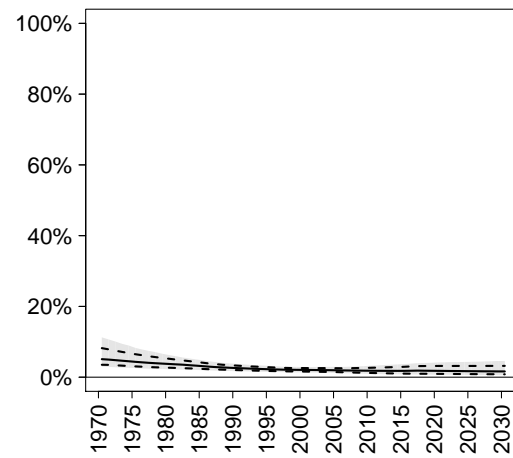

**Unmet need**

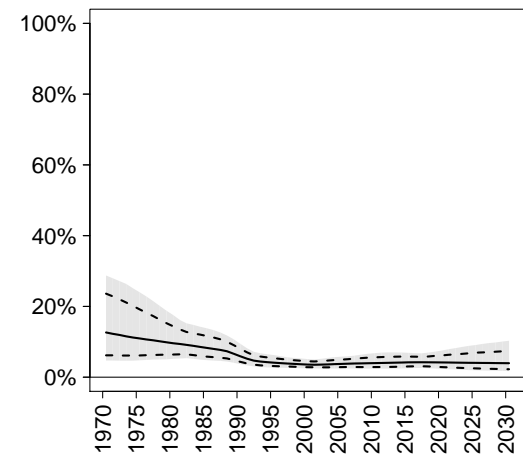

**Total demand**

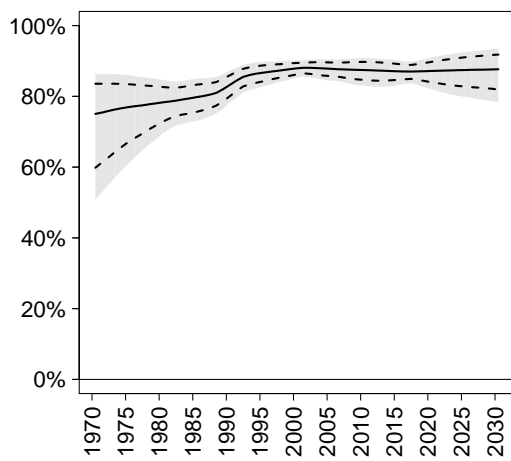

**Demand satisfied  
(any method)**

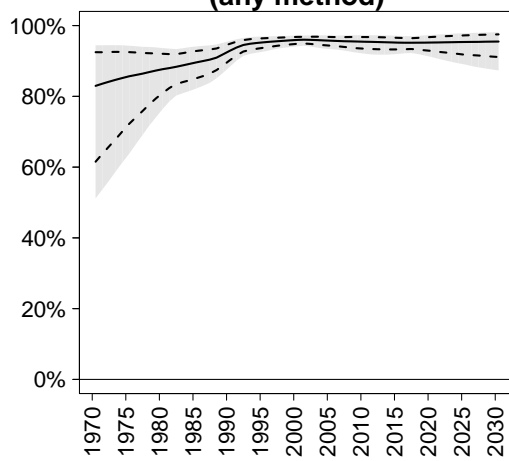

**Demand satisfied  
(modern methods)**

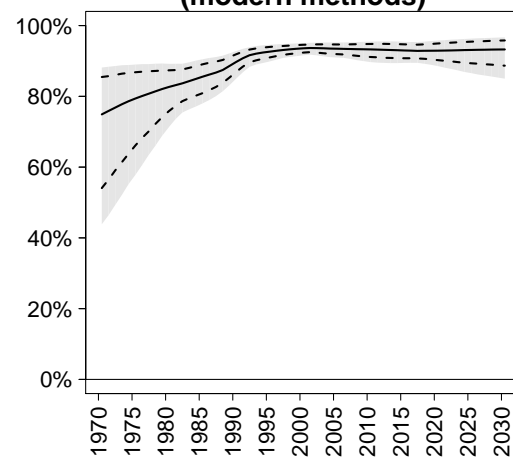

South-eastern Asia --- Married / In-Union

**CP (any)**

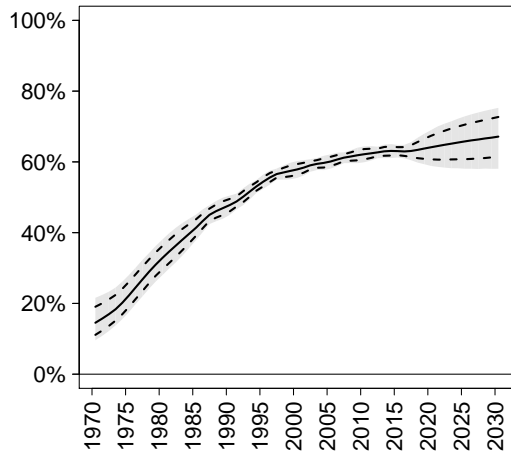

**CP (modern)**

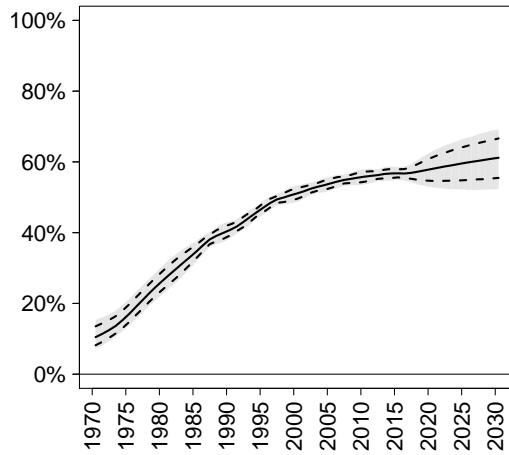

**CP (traditional)**

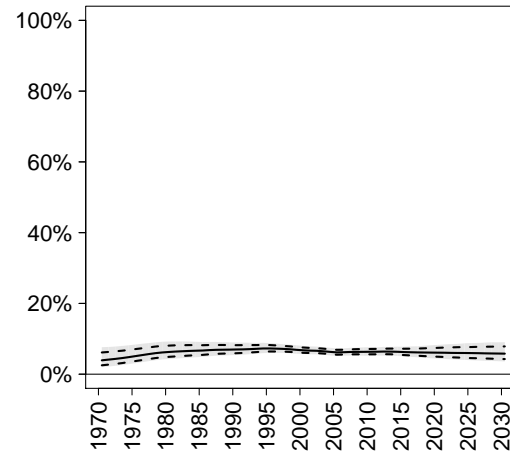

**Unmet need**

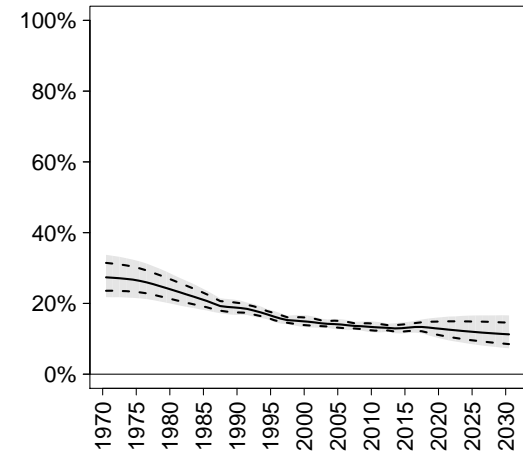

**Total demand**

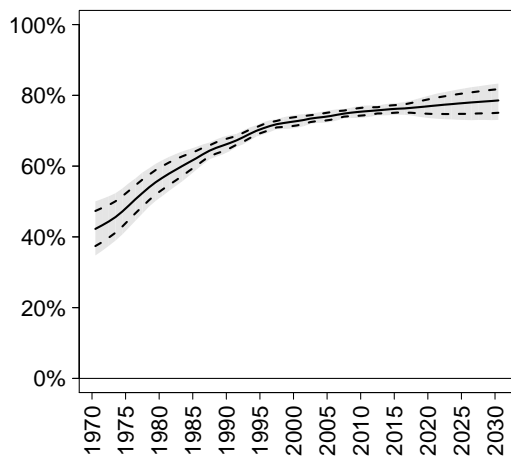

**Demand satisfied  
(any method)**

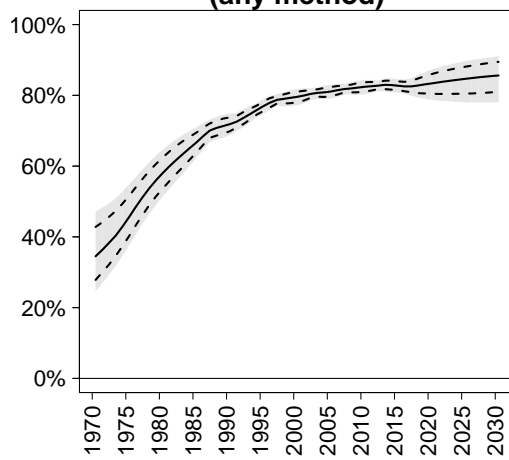

**Demand satisfied  
(modern methods)**

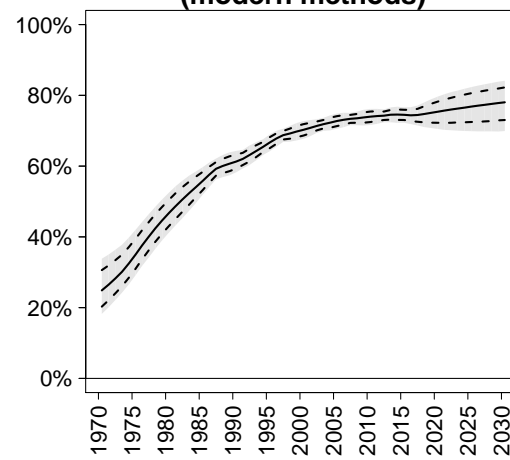



Southern Asia --- Married / In-Union

**CP (any)**

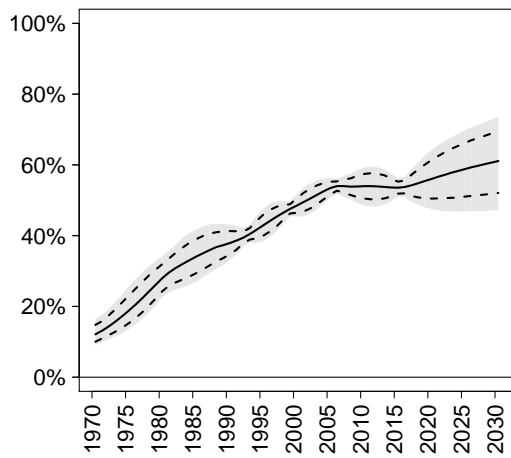

**CP (modern)**

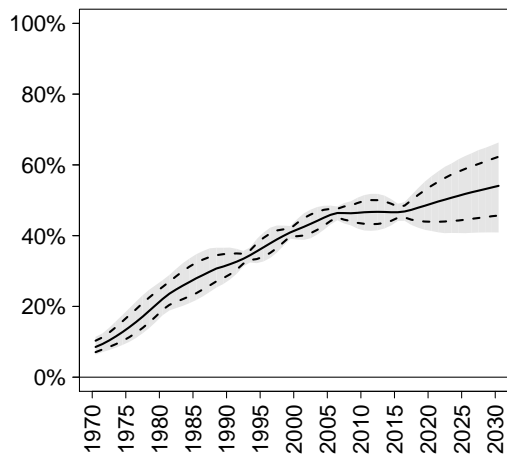

**CP (traditional)**

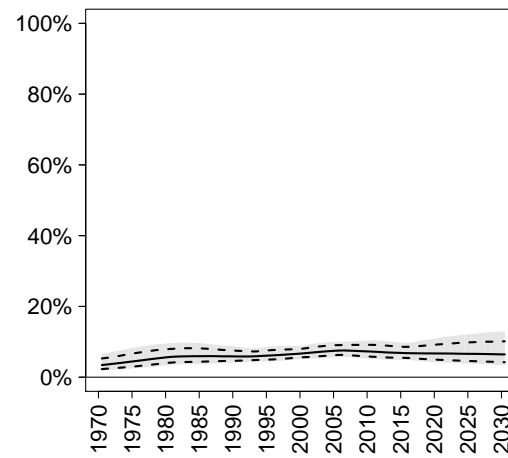

**Unmet need**

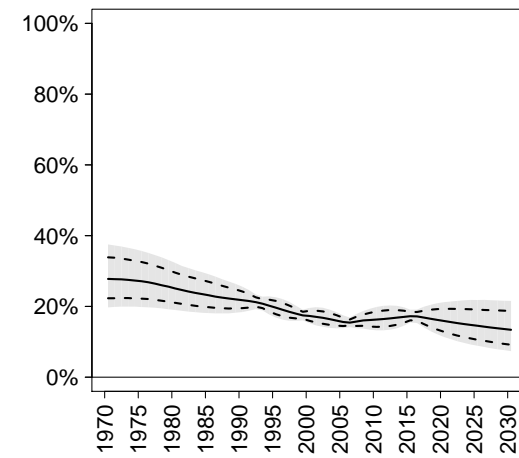

**Total demand**

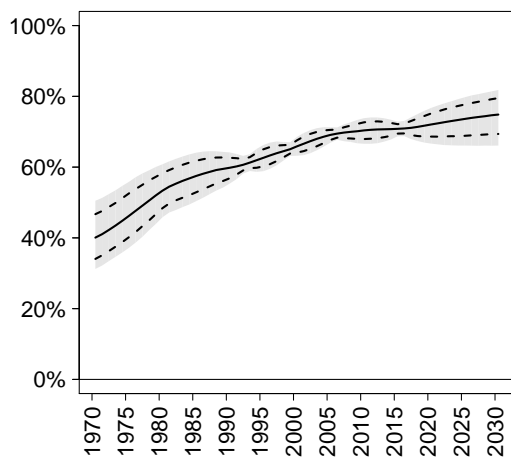

**Demand satisfied  
(any method)**

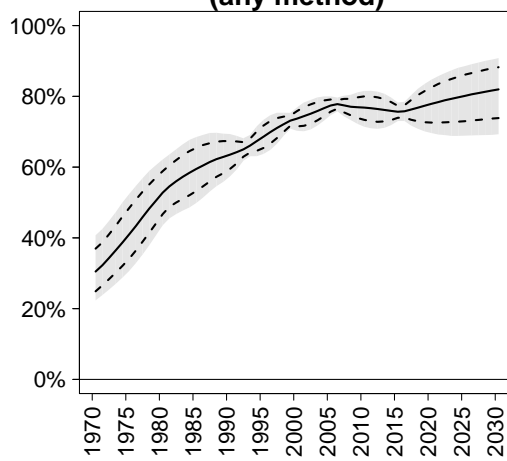

**Demand satisfied  
(modern methods)**

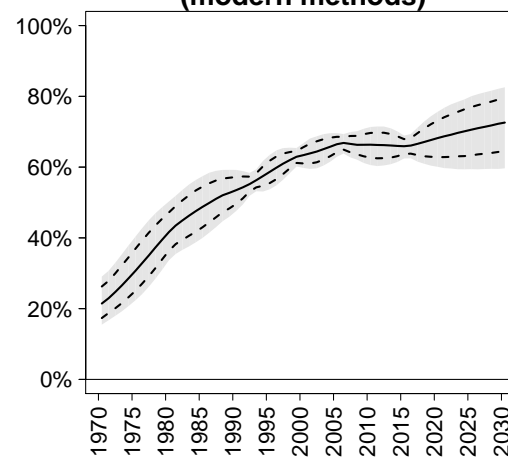

Western Asia --- Married / In-Union

**CP (any)**

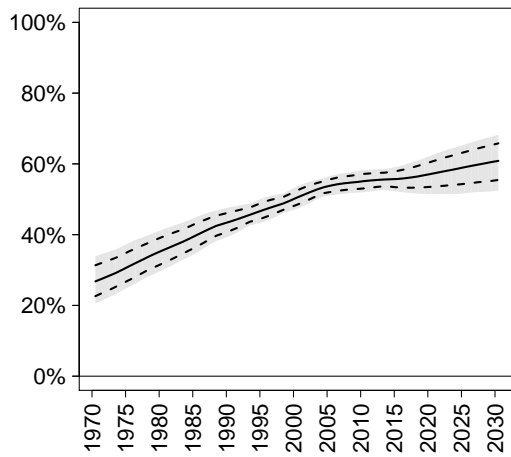

**CP (modern)**

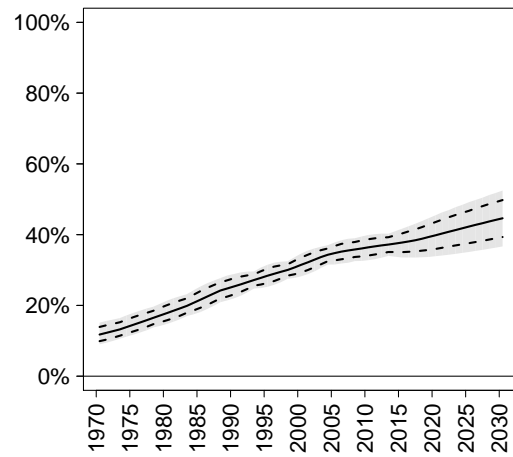

**CP (traditional)**

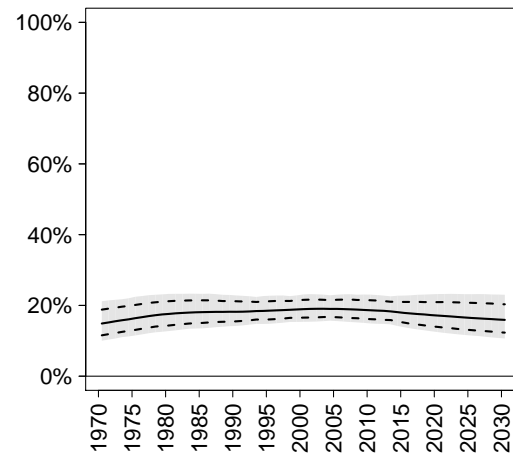

**Unmet need**

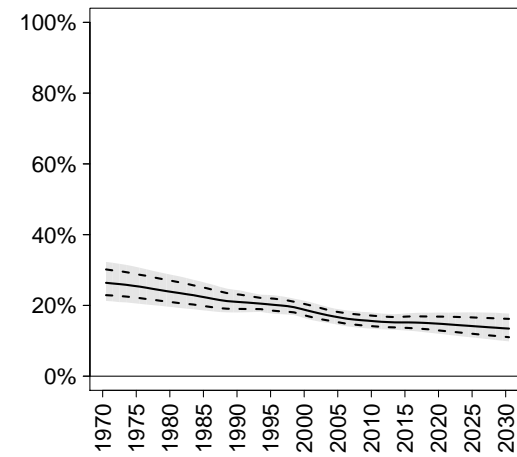

**Total demand**

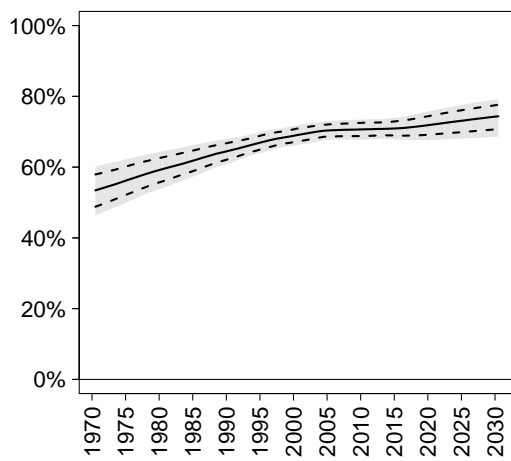

**Demand satisfied  
(any method)**

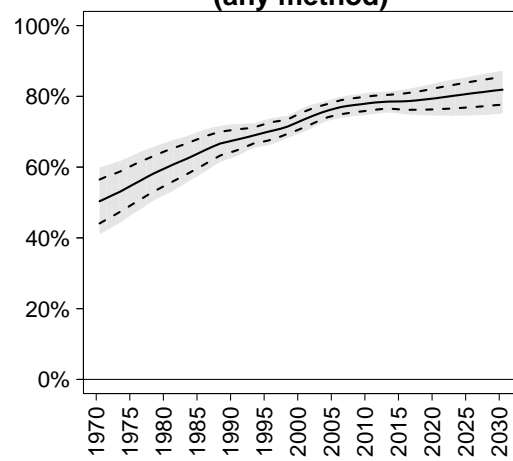

**Demand satisfied  
(modern methods)**

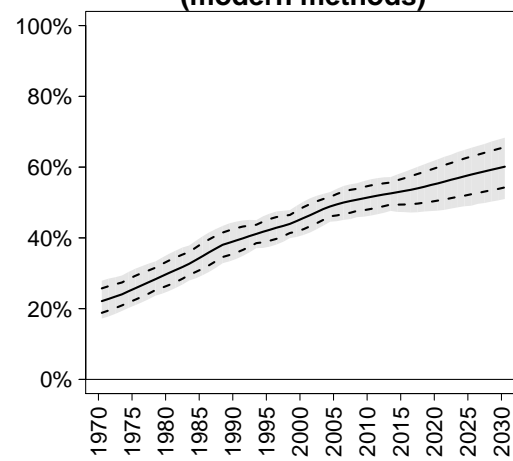

Europe --- Married / In-Union

**CP (any)**

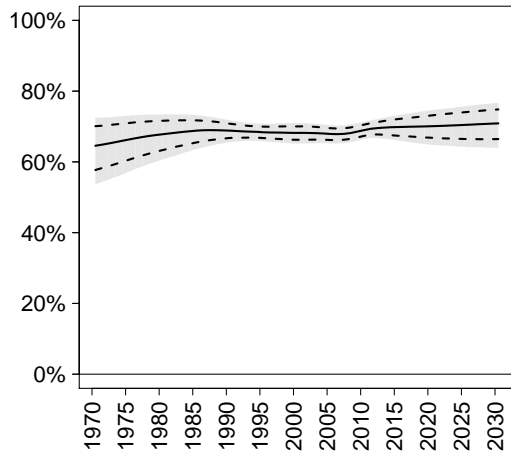

**CP (modern)**

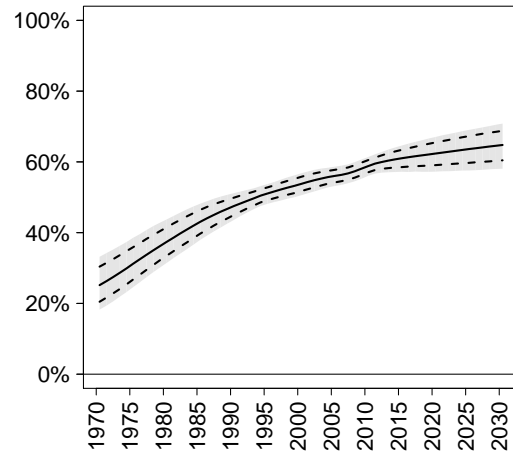

**CP (traditional)**

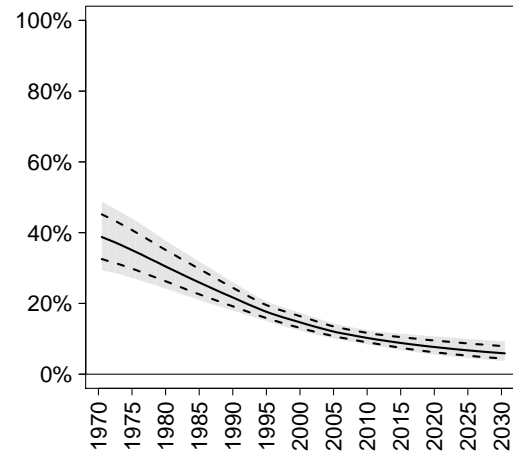

**Unmet need**

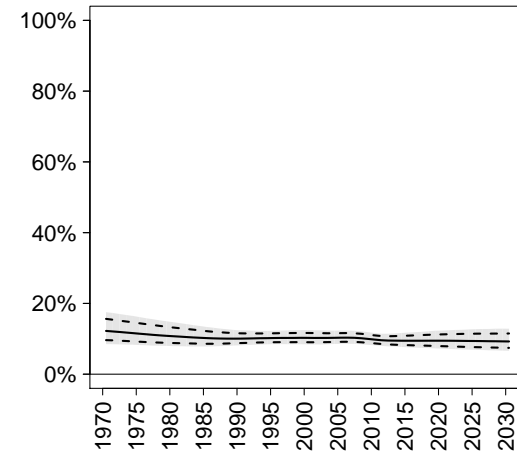

**Total demand**

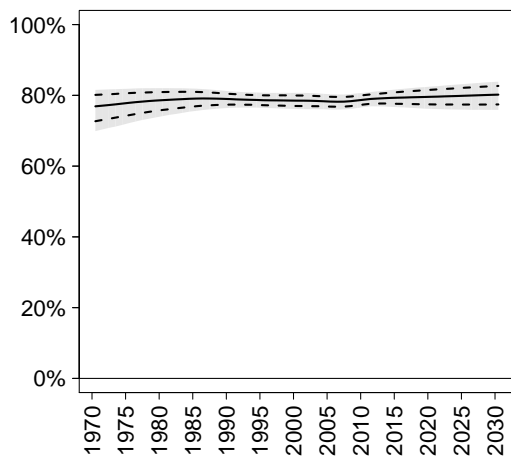

**Demand satisfied  
(any method)**

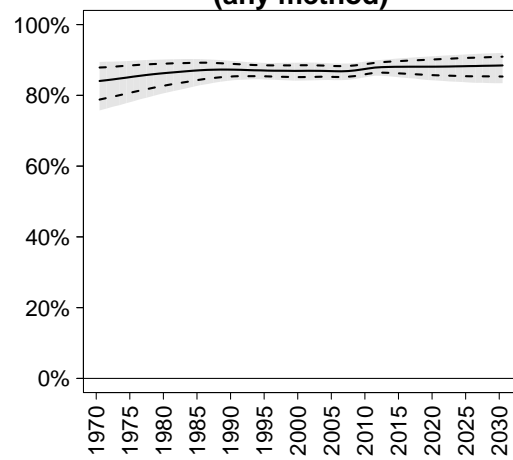

**Demand satisfied  
(modern methods)**

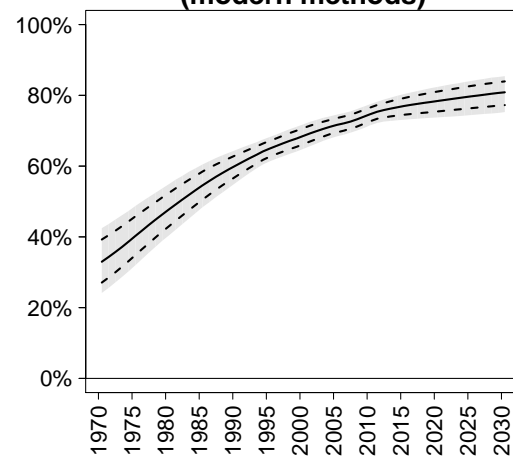

Eastern Europe --- Married / In-Union

**CP (any)**

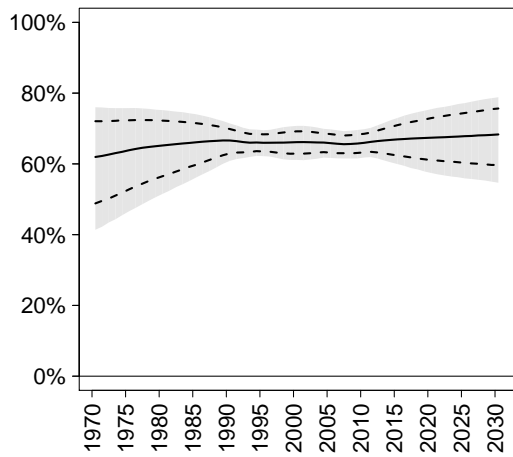

**CP (modern)**

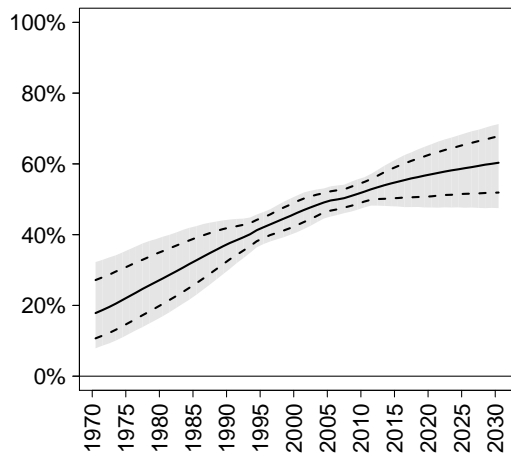

**CP (traditional)**

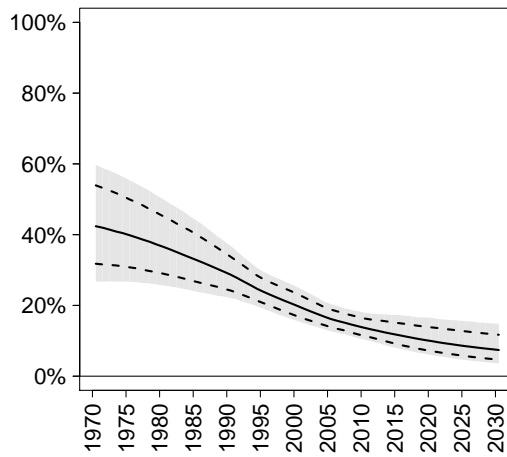

**Unmet need**

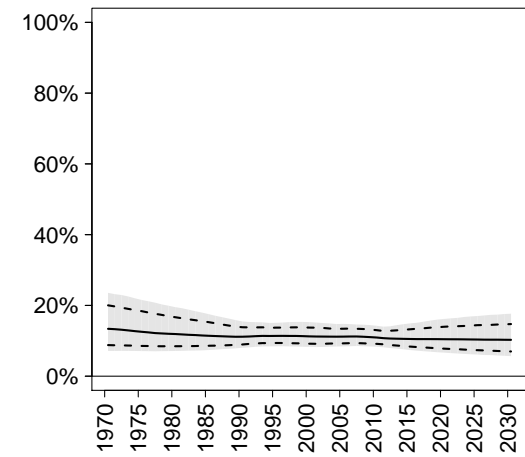

**Total demand**

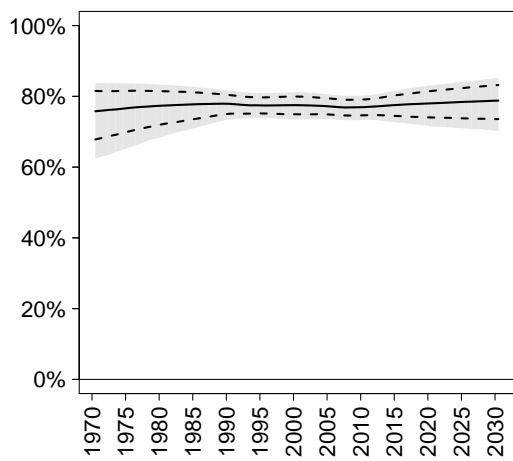

**Demand satisfied (any method)**

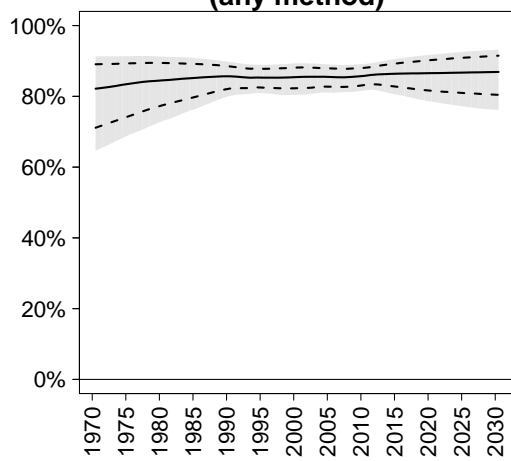

**Demand satisfied (modern methods)**

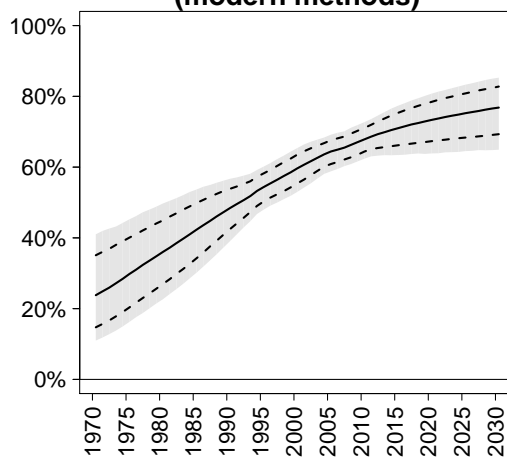

Northern Europe --- Married / In-Union

**CP (any)**

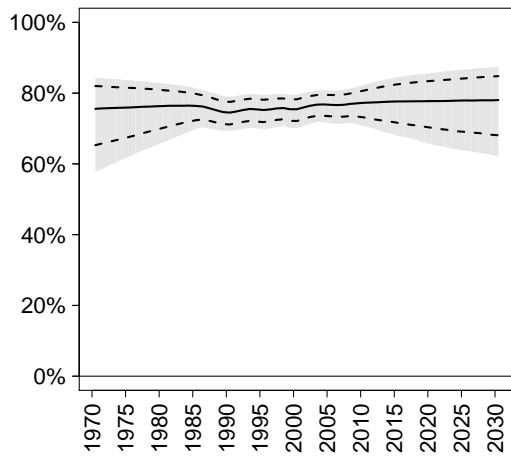

**CP (modern)**

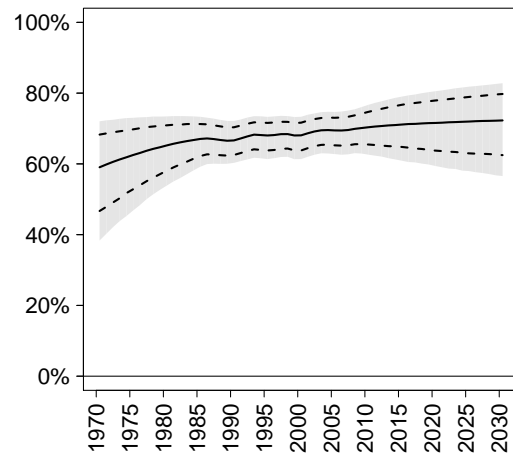

**CP (traditional)**

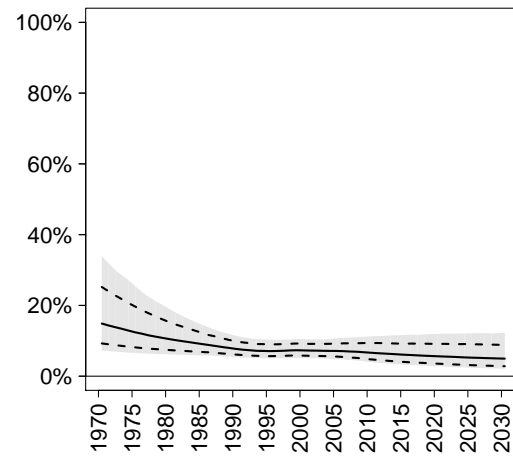

**Unmet need**

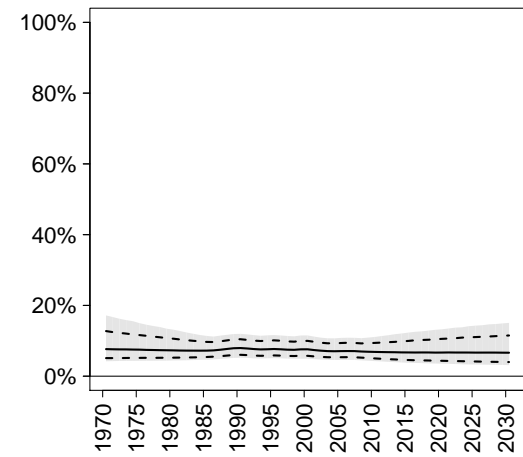

**Total demand**

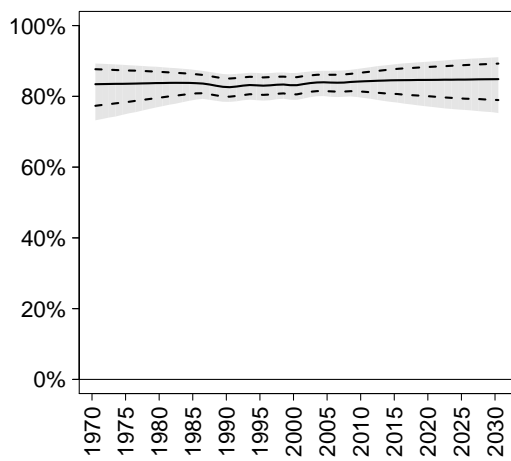

**Demand satisfied  
(any method)**

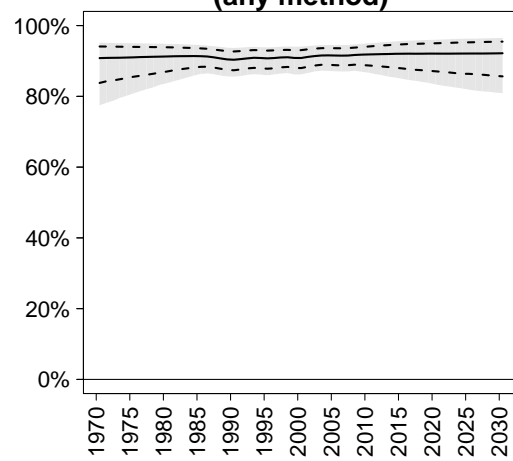

**Demand satisfied  
(modern methods)**

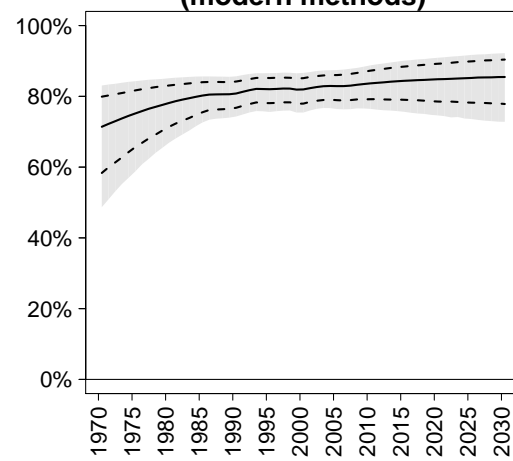

Southern Europe --- Married / In-Union

**CP (any)**

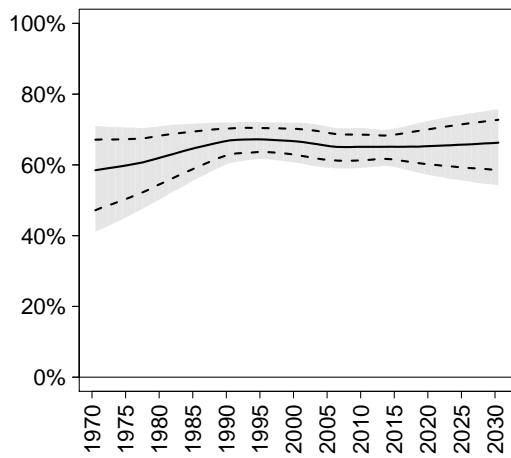

**CP (modern)**

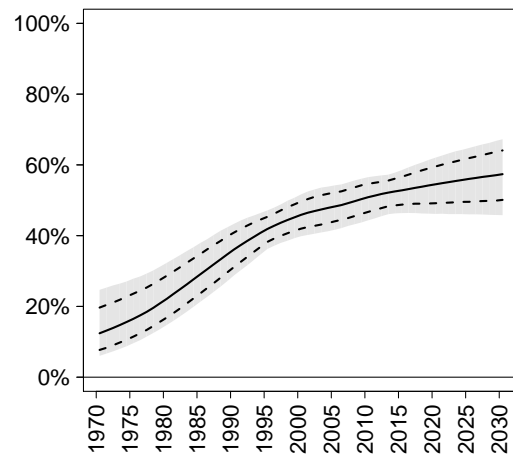

**CP (traditional)**

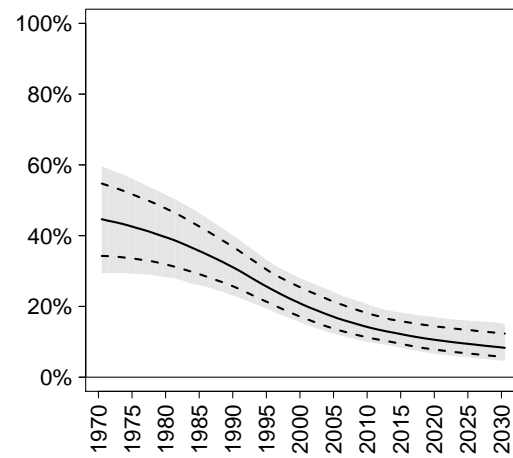

**Unmet need**

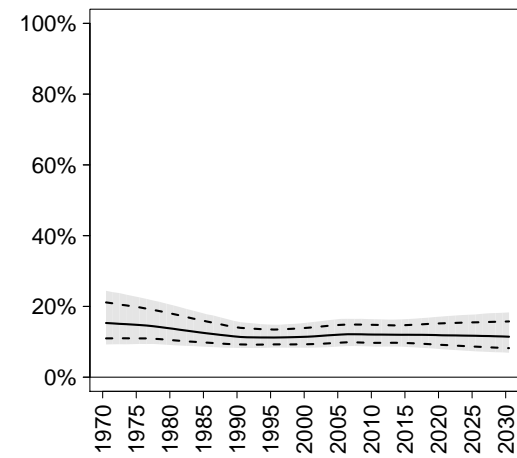

**Total demand**

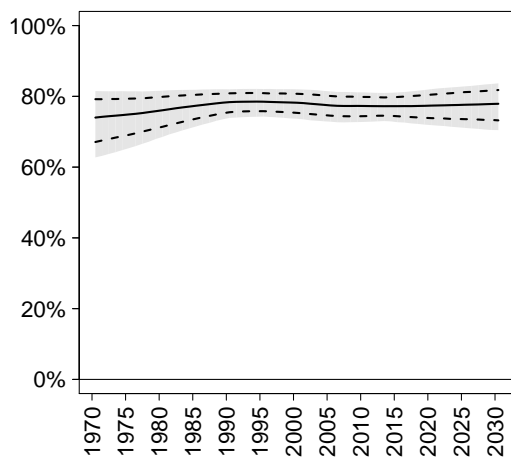

**Demand satisfied  
(any method)**

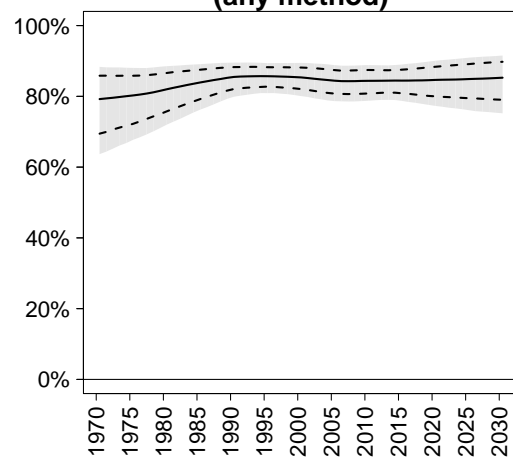

**Demand satisfied  
(modern methods)**

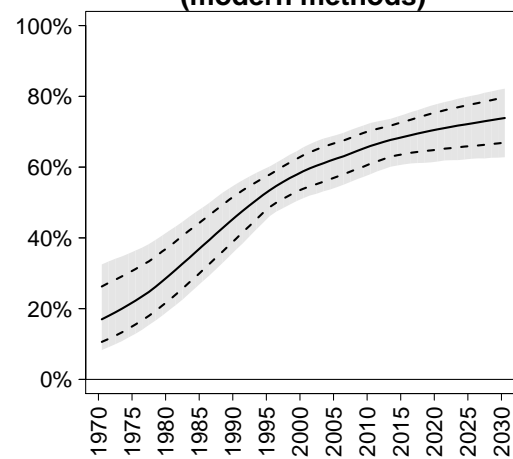

Western Europe --- Married / In-Union

**CP (any)**

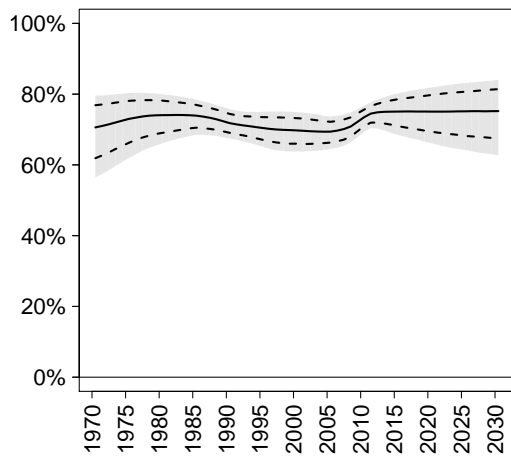

**CP (modern)**

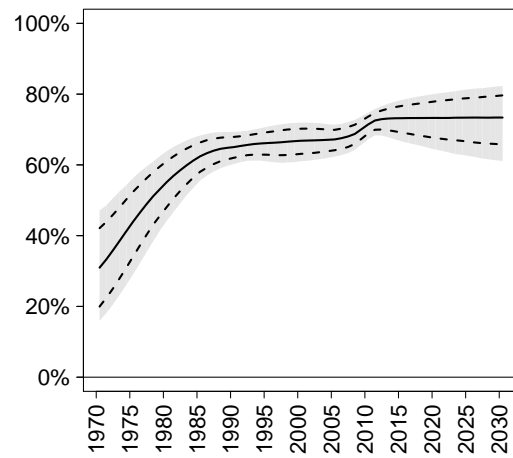

**CP (traditional)**

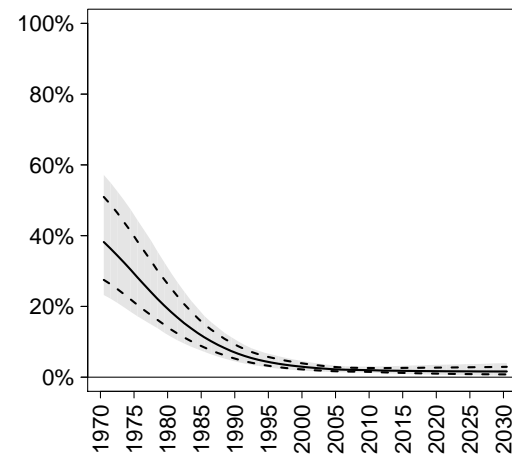

**Unmet need**

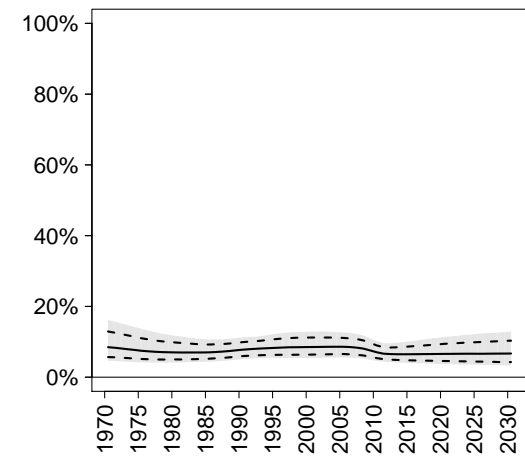

**Total demand**

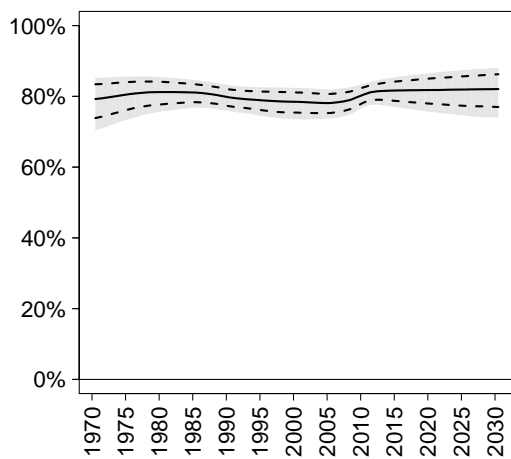

**Demand satisfied  
(any method)**

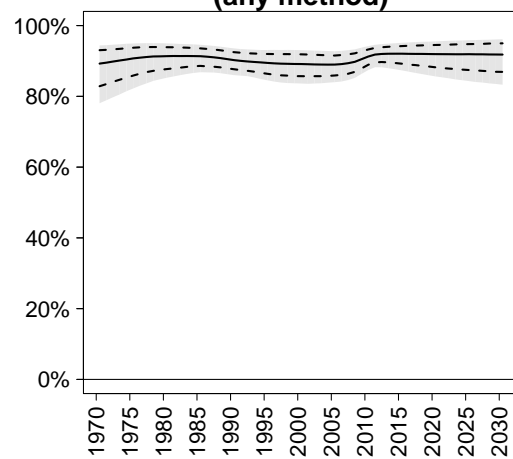

**Demand satisfied  
(modern methods)**

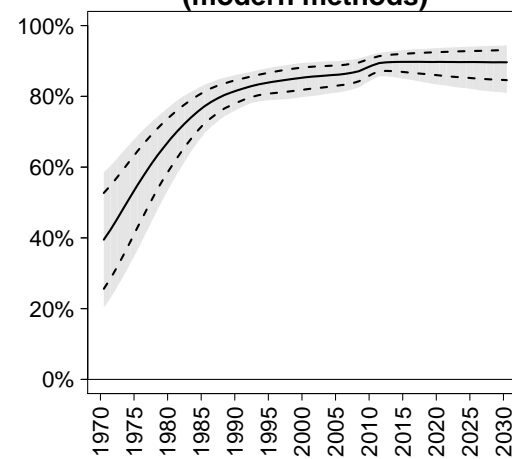

Latin America and the Caribbean --- Married / In-Union

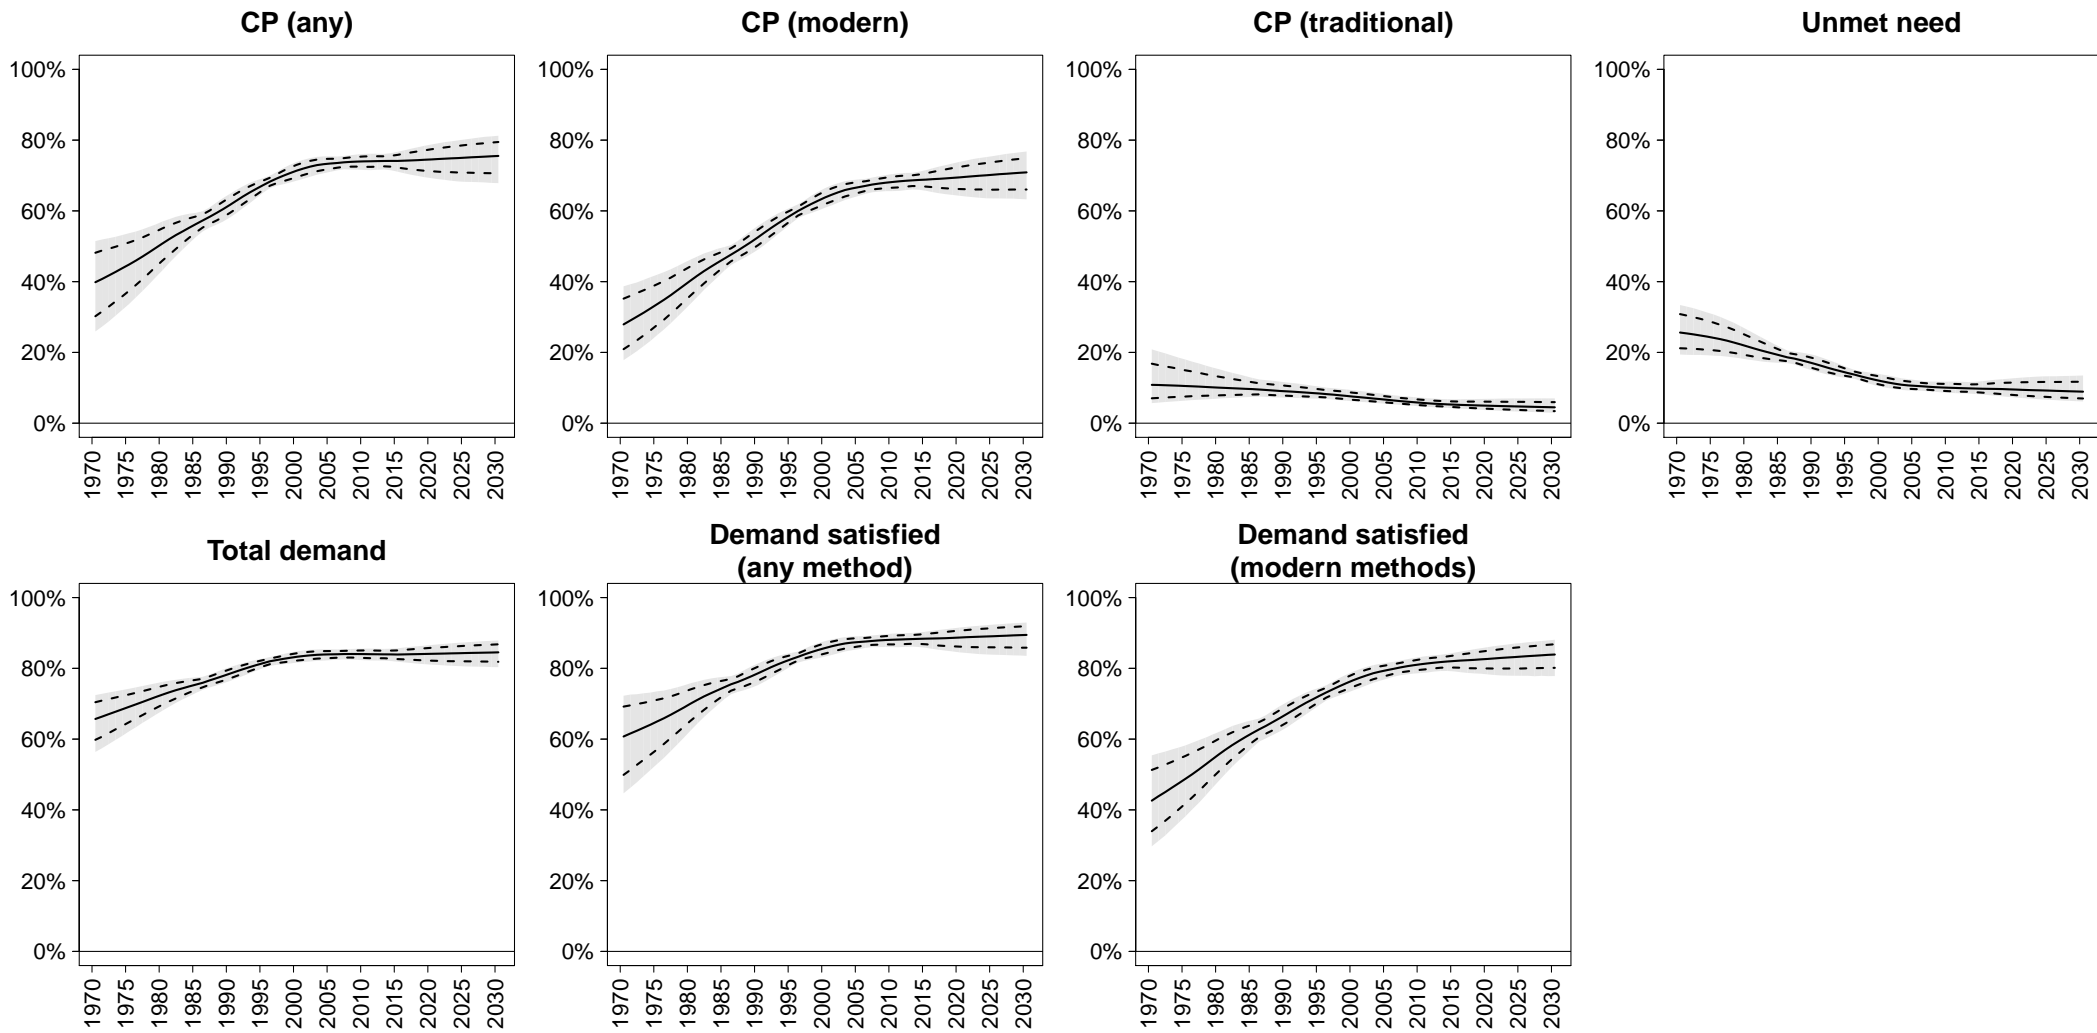



Caribbean ---- Married / In-Union

**CP (any)**

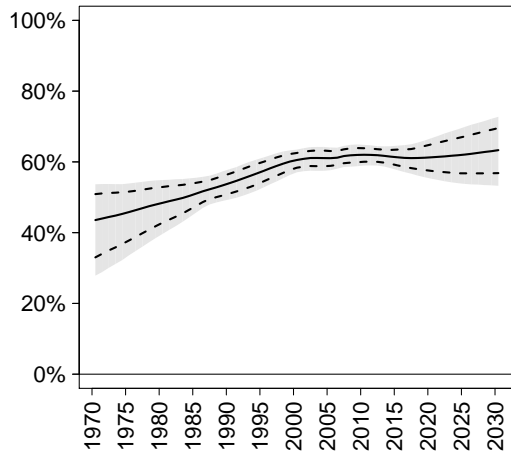

**CP (modern)**

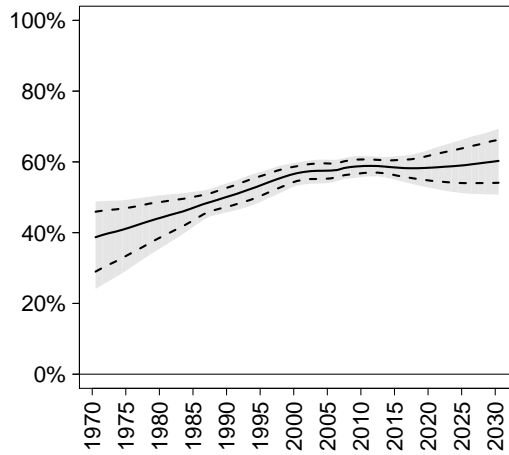

**CP (traditional)**

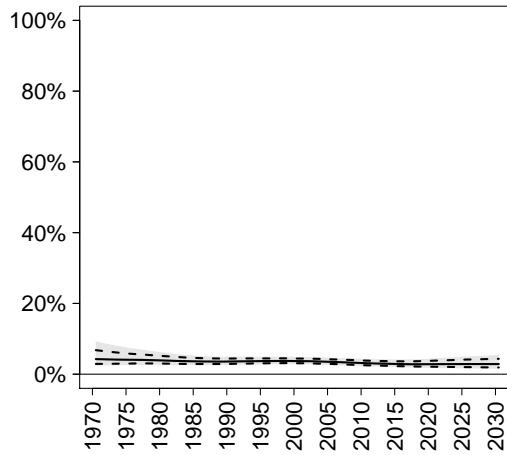

**Unmet need**

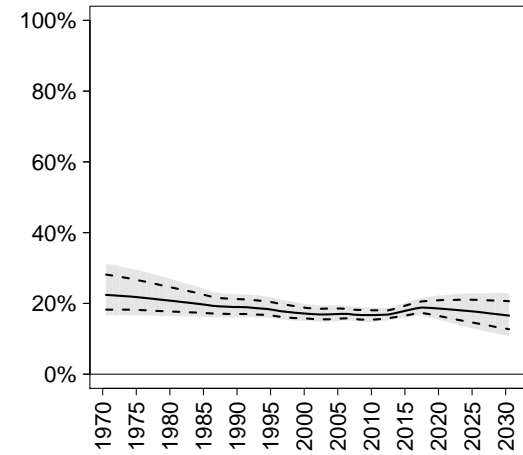

**Total demand**

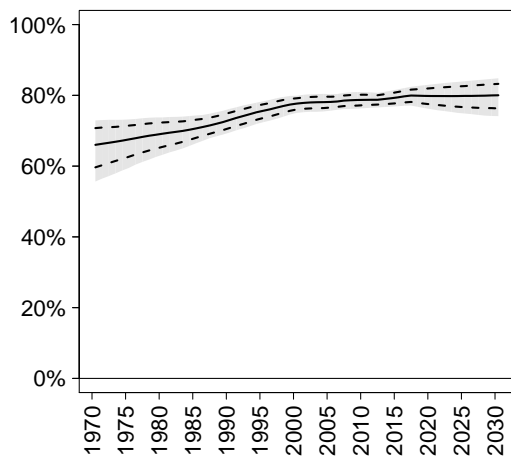

**Demand satisfied  
(any method)**

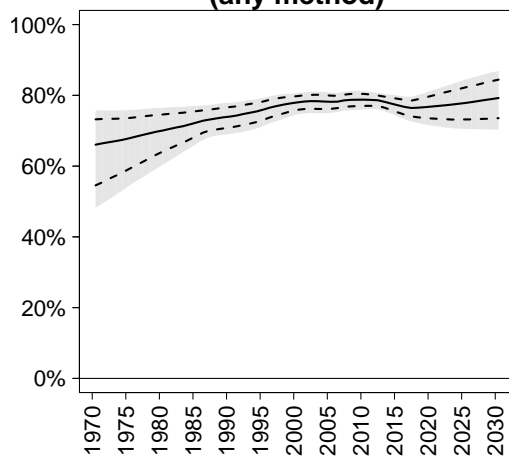

**Demand satisfied  
(modern methods)**

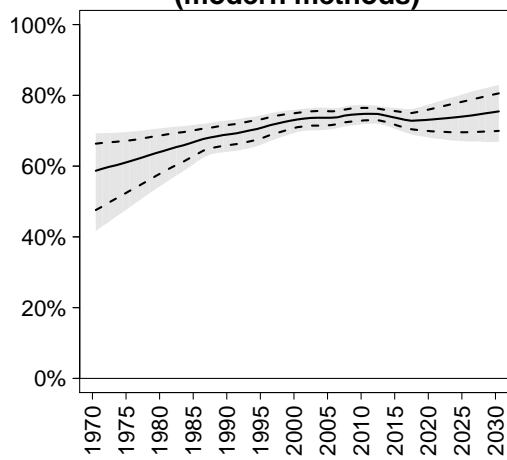

Central America --- Married / In-Union

**CP (any)**

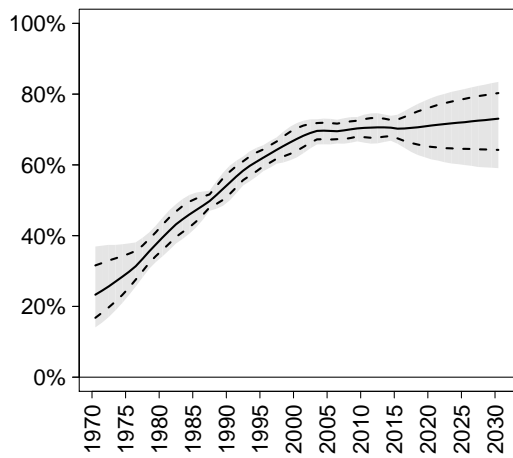

**CP (modern)**

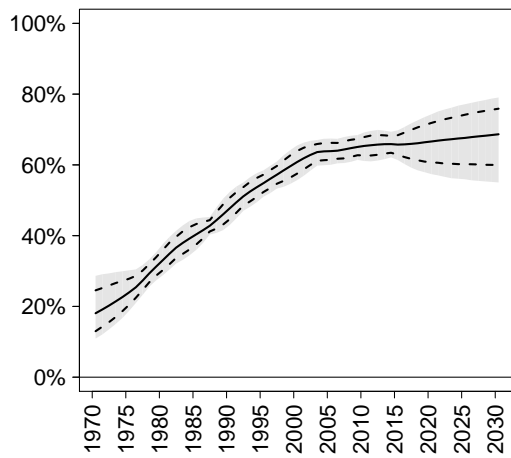

**CP (traditional)**

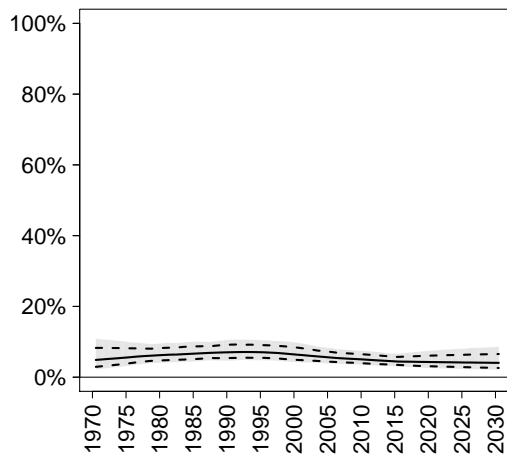

**Unmet need**

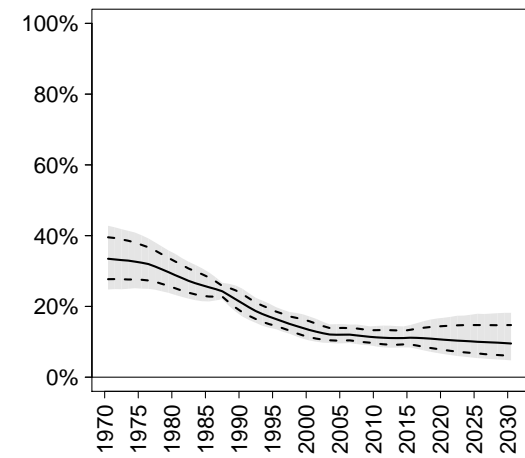

**Total demand**

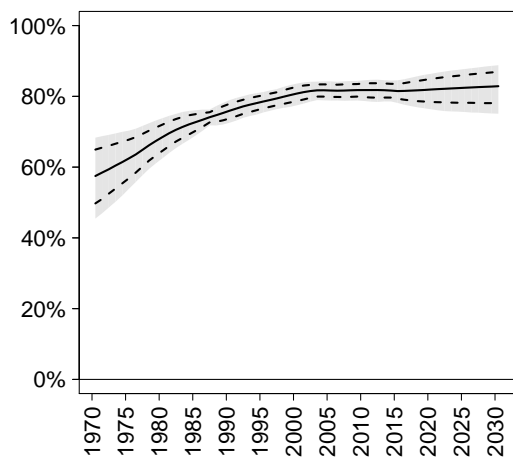

**Demand satisfied  
(any method)**

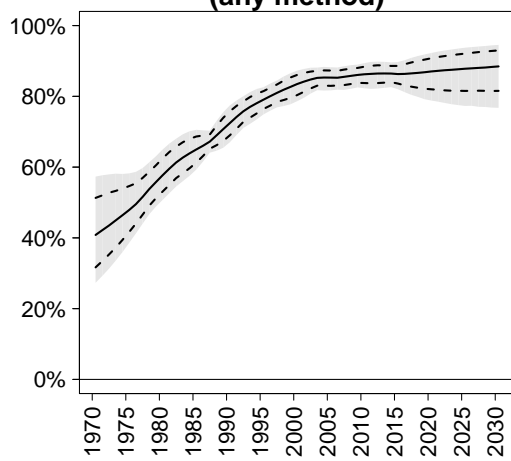

**Demand satisfied  
(modern methods)**

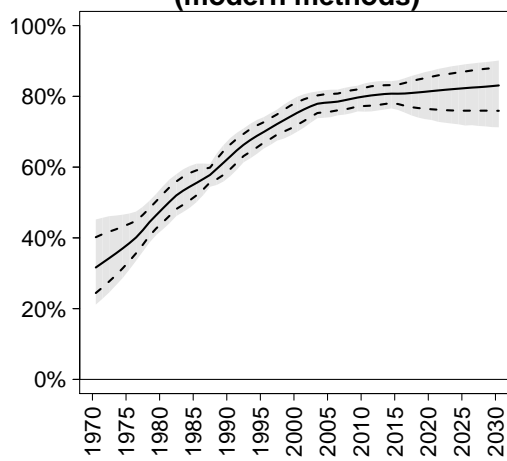

South America --- Married / In-Union

**CP (any)**

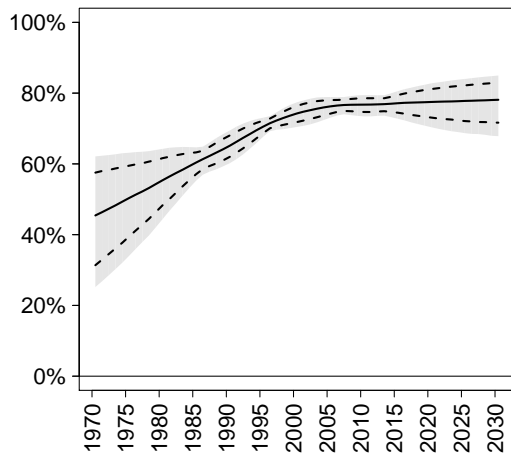

**CP (modern)**

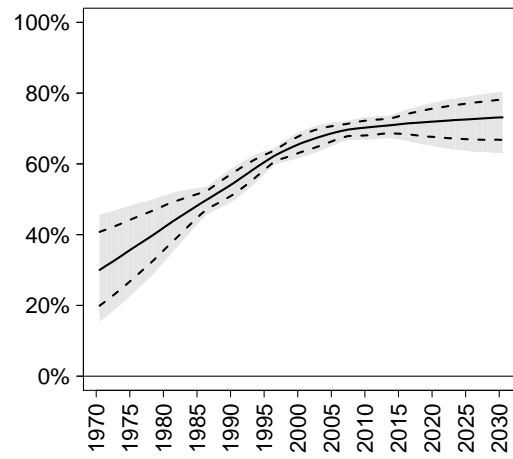

**CP (traditional)**

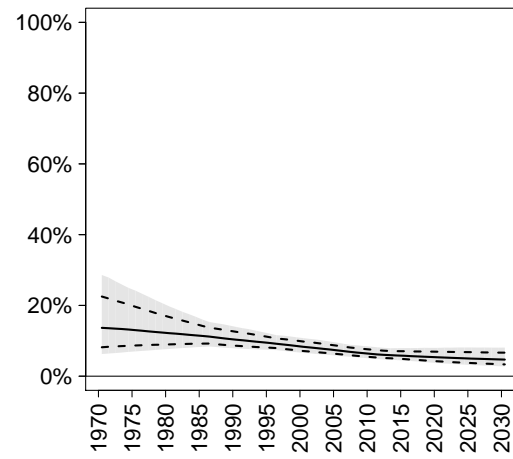

**Unmet need**

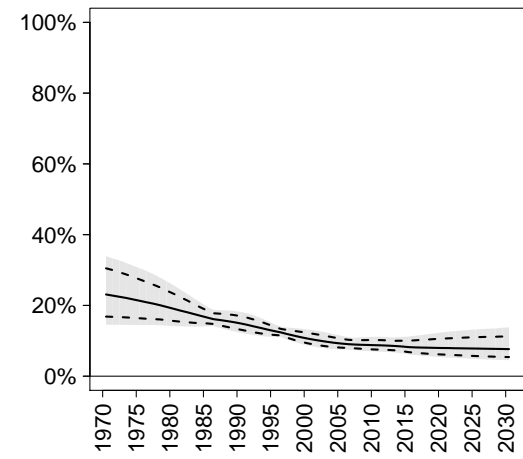

**Total demand**

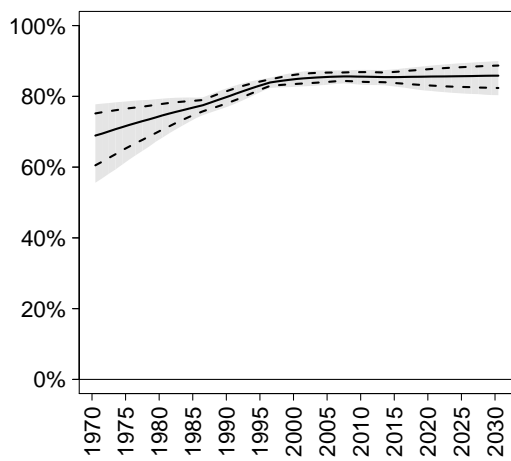

**Demand satisfied  
(any method)**

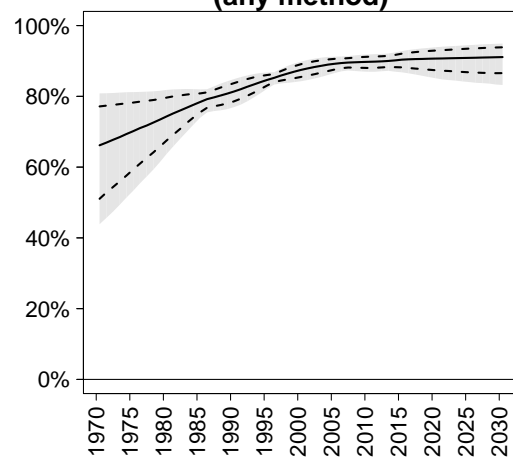

**Demand satisfied  
(modern methods)**

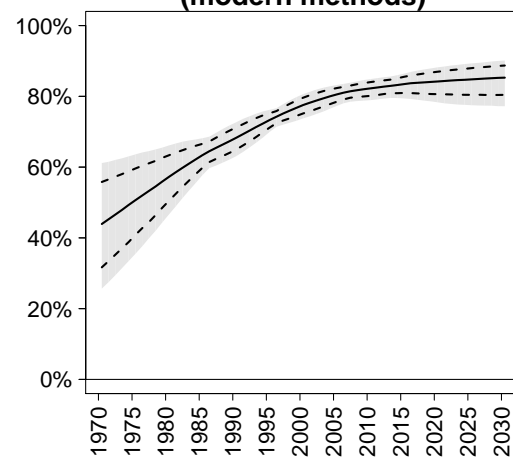

Northern America --- Married / In-Union

**CP (any)**

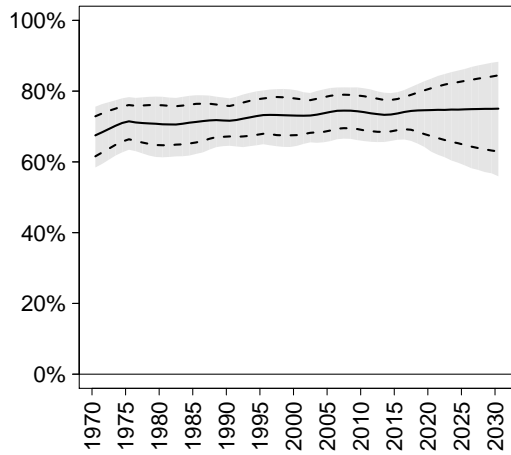

**CP (modern)**

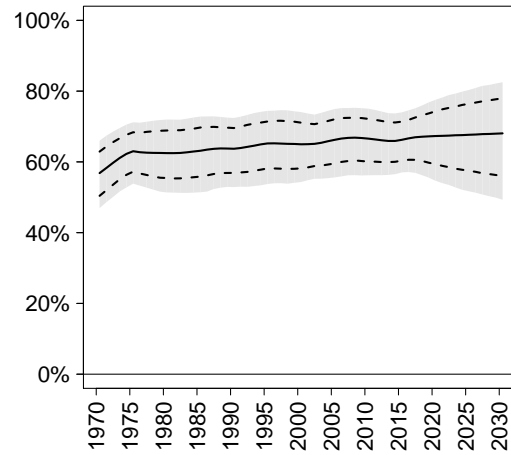

**CP (traditional)**

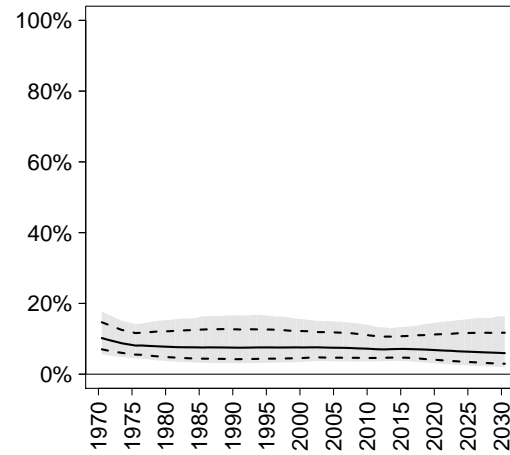

**Unmet need**

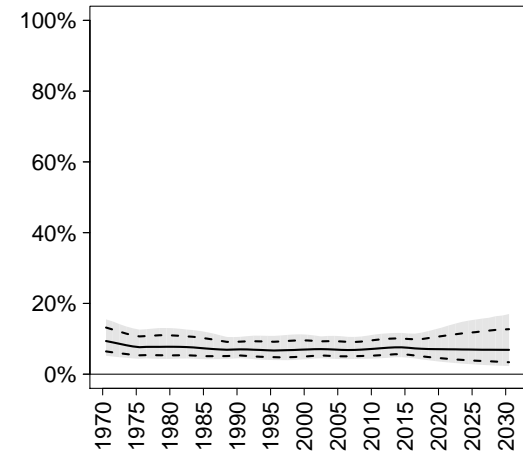

**Total demand**

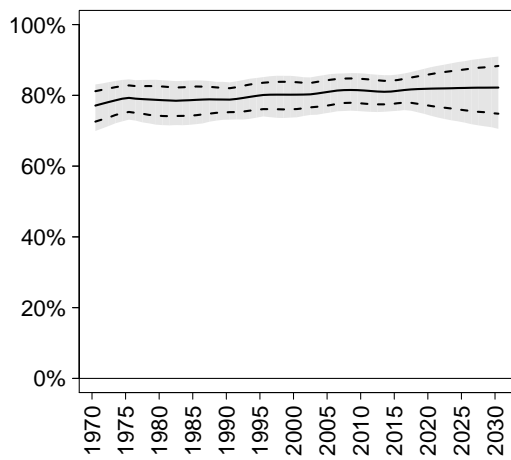

**Demand satisfied  
(any method)**

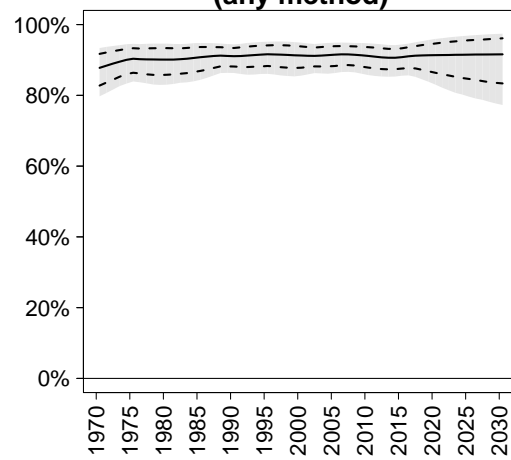

**Demand satisfied  
(modern methods)**

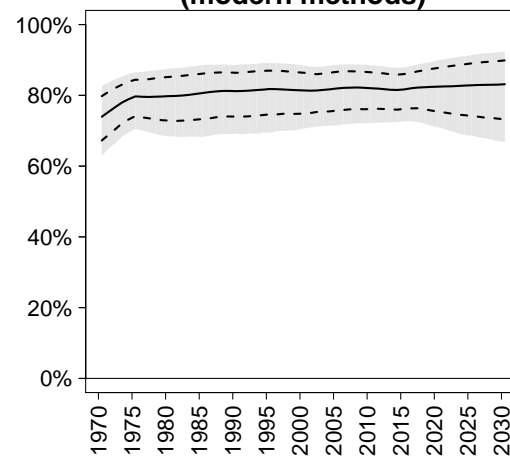

Oceania --- Married / In-Union

**CP (any)**

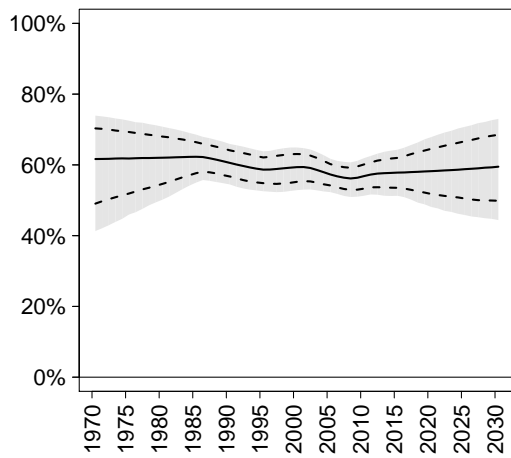

**CP (modern)**

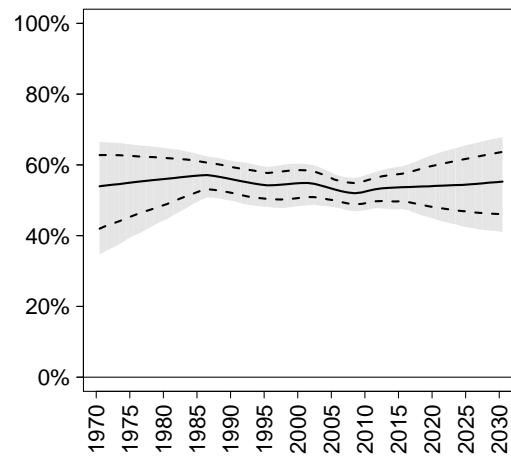

**CP (traditional)**

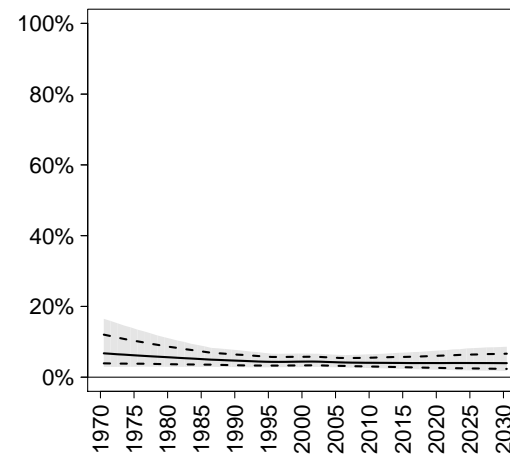

**Unmet need**

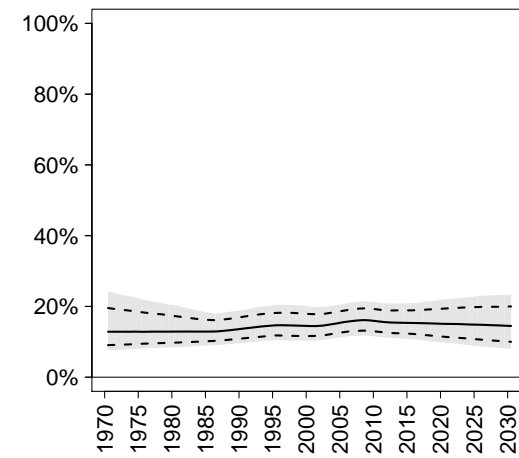

**Total demand**

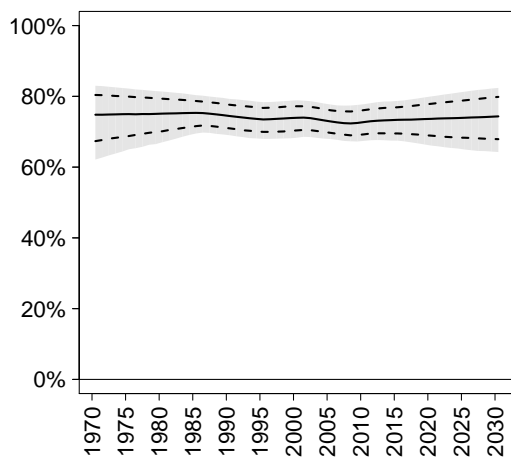

**Demand satisfied (any method)**

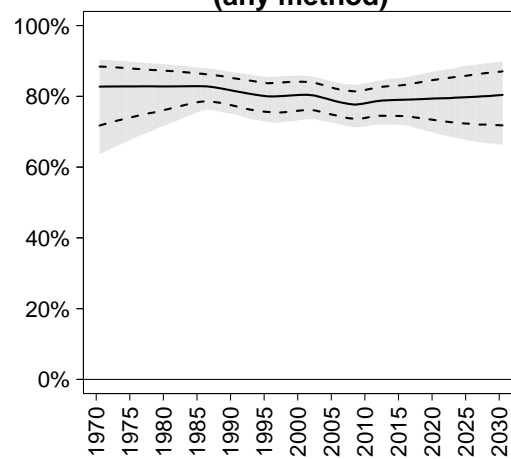

**Demand satisfied (modern methods)**

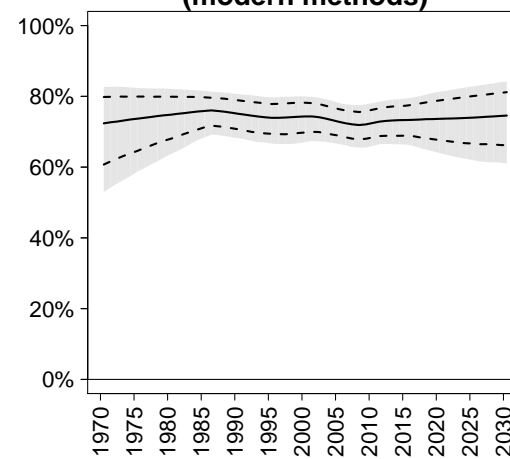

Australia and New Zealand --- Married / In-Union

**CP (any)**

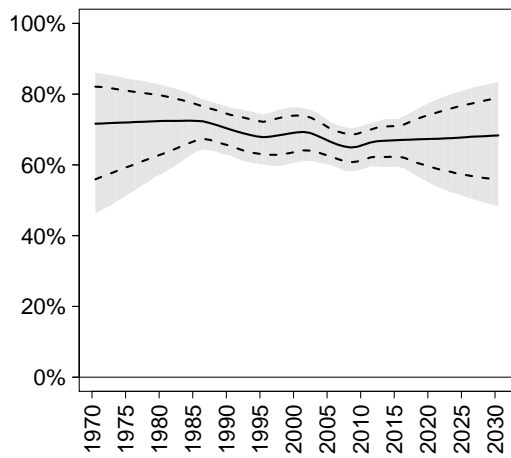

**CP (modern)**

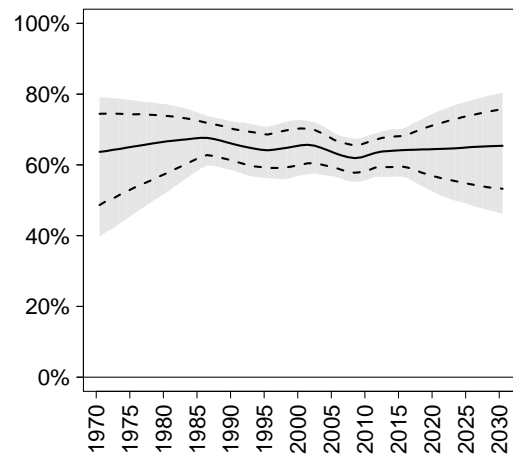

**CP (traditional)**

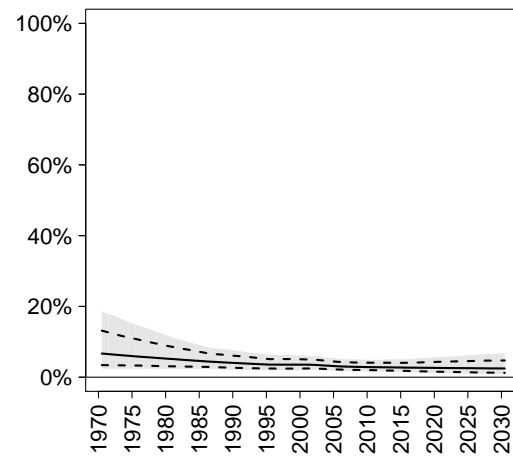

**Unmet need**

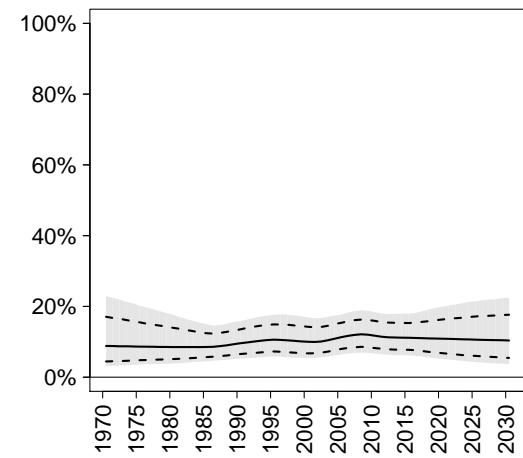

**Total demand**

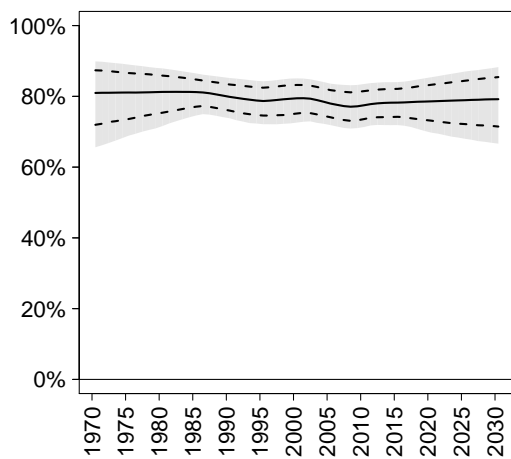

**Demand satisfied  
(any method)**

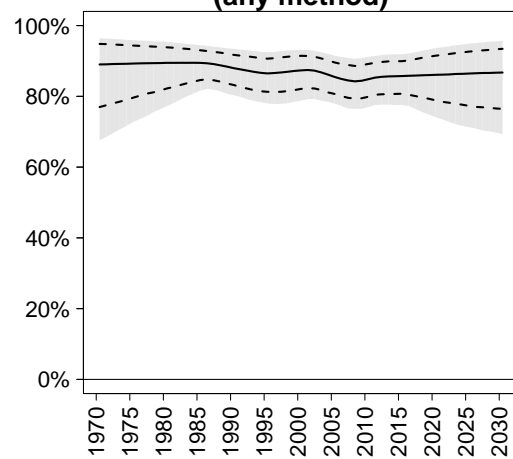

**Demand satisfied  
(modern methods)**

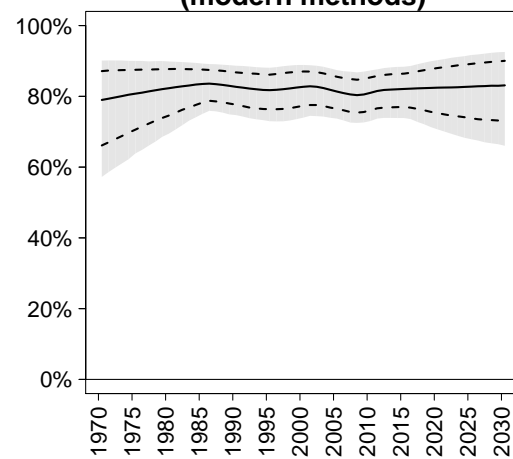

Melanesia --- Married / In-Union

**CP (any)**

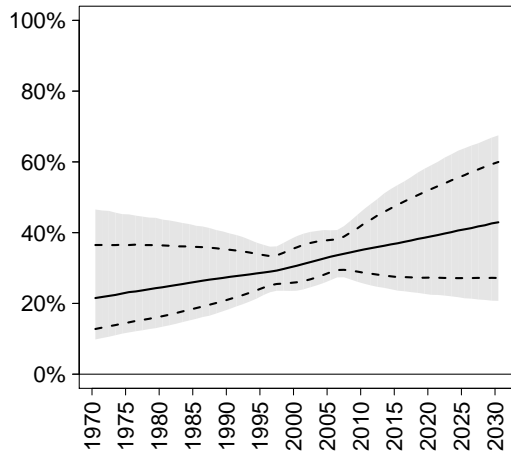

**CP (modern)**

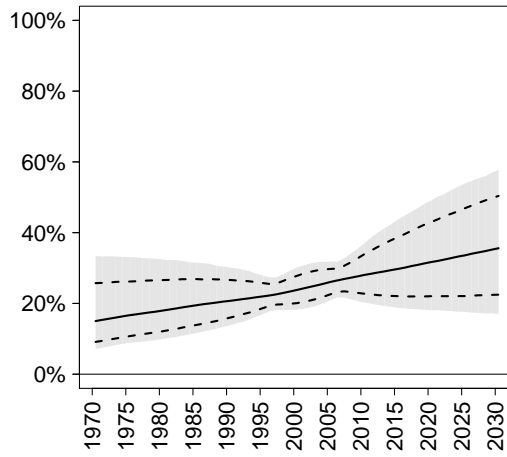

**CP (traditional)**

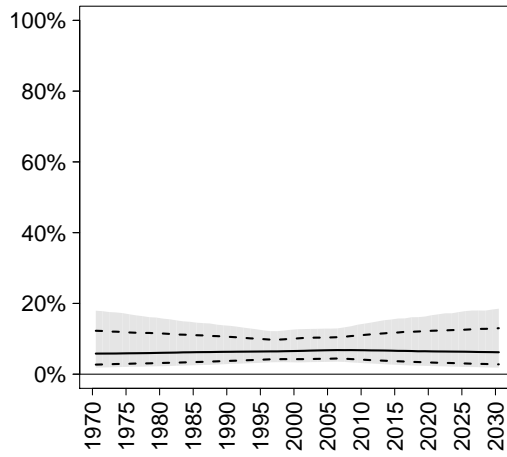

**Unmet need**

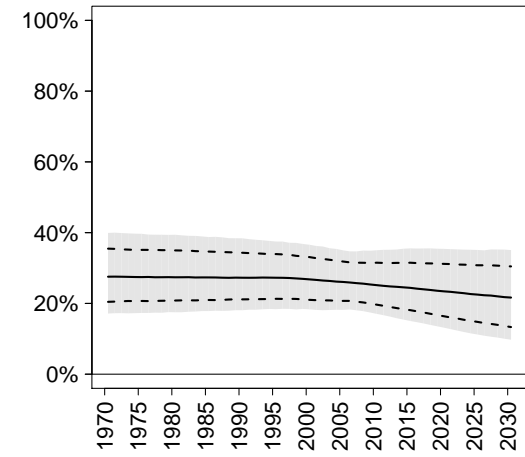

**Total demand**

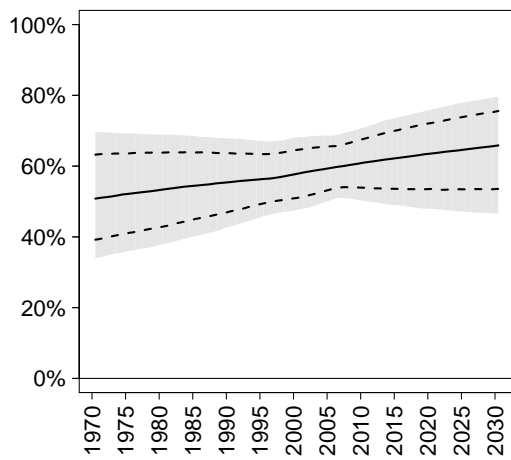

**Demand satisfied (any method)**

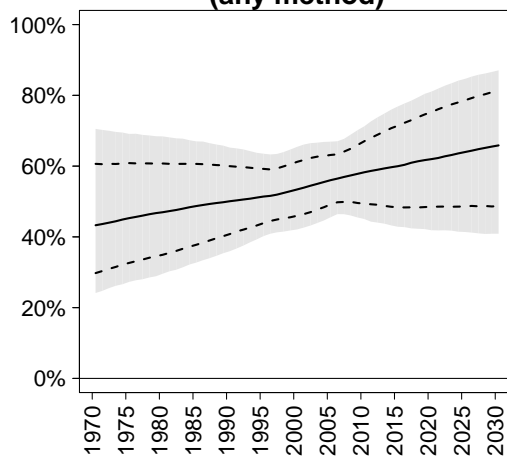

**Demand satisfied (modern methods)**

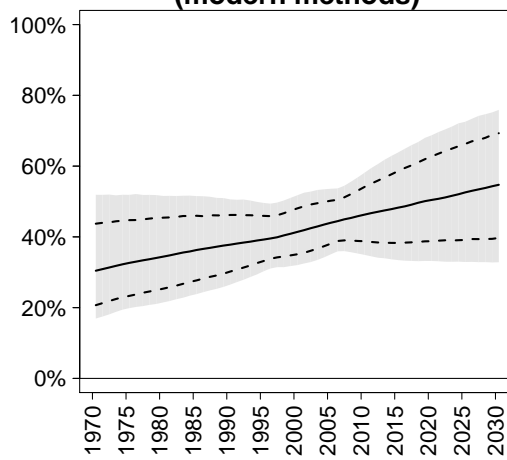

Micronesia --- Married / In-Union

**CP (any)**

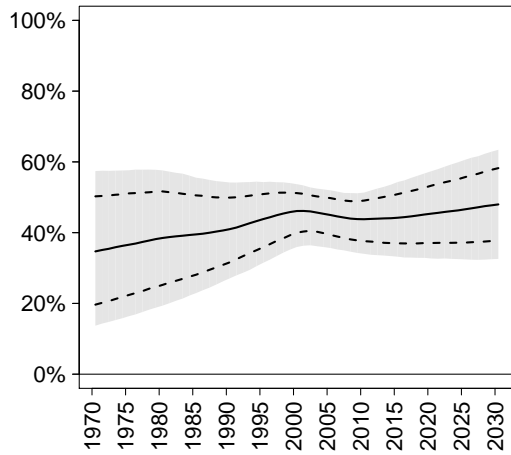

**CP (modern)**

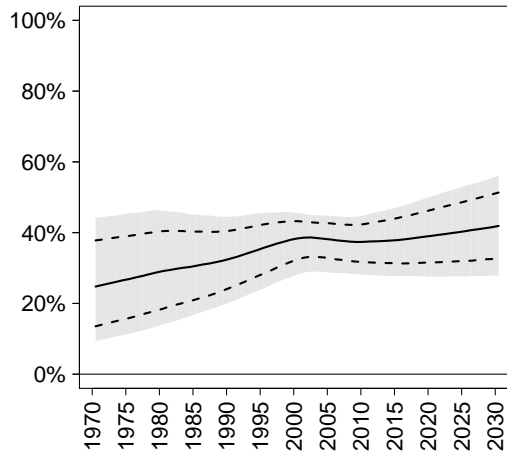

**CP (traditional)**

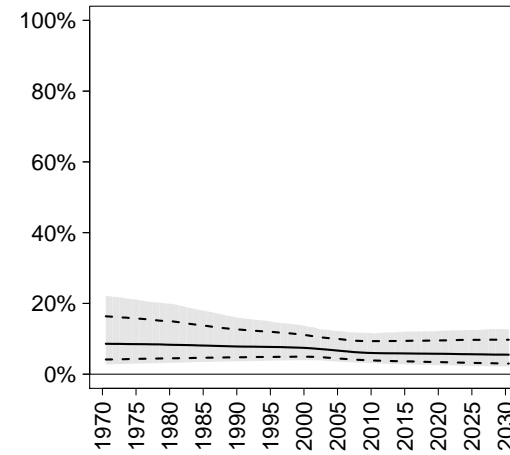

**Unmet need**

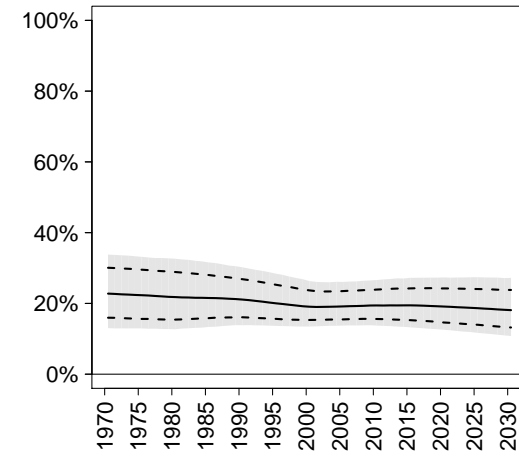

**Total demand**

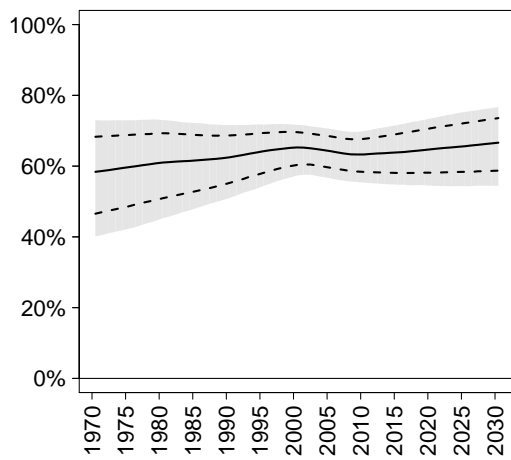

**Demand satisfied (any method)**

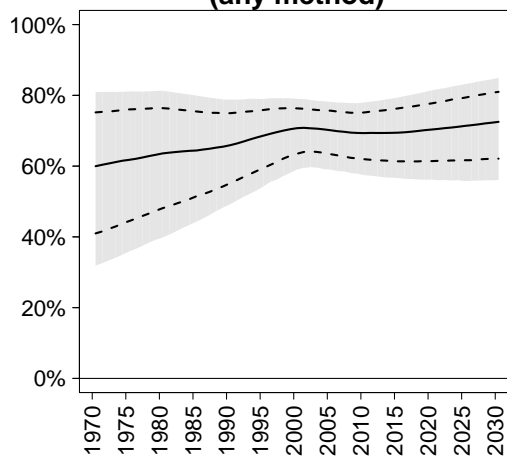

**Demand satisfied (modern methods)**

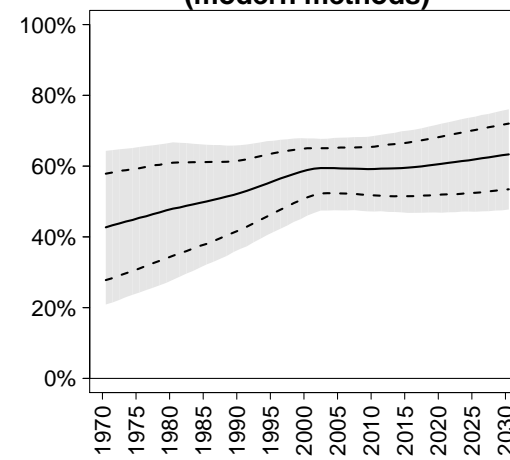



Polynesia --- Married / In-Union

**CP (any)**

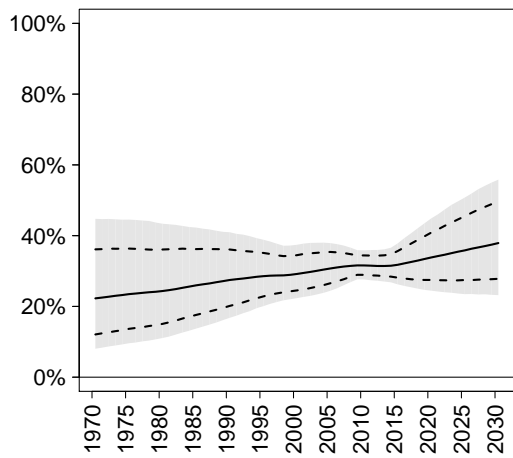

**CP (modern)**

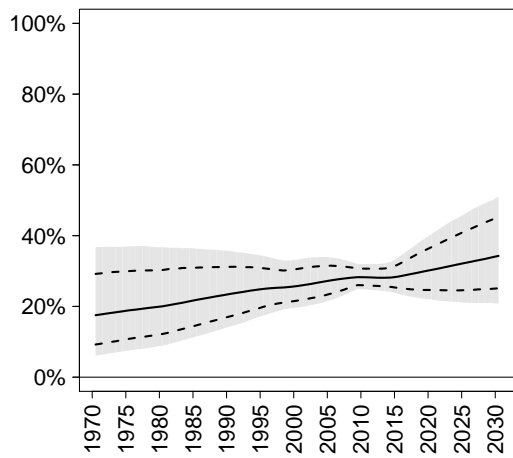

**CP (traditional)**

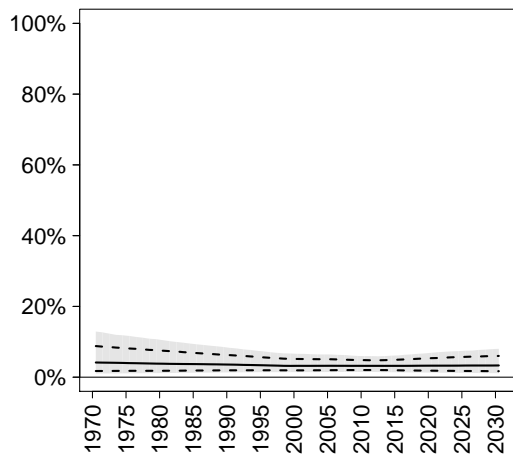

**Unmet need**

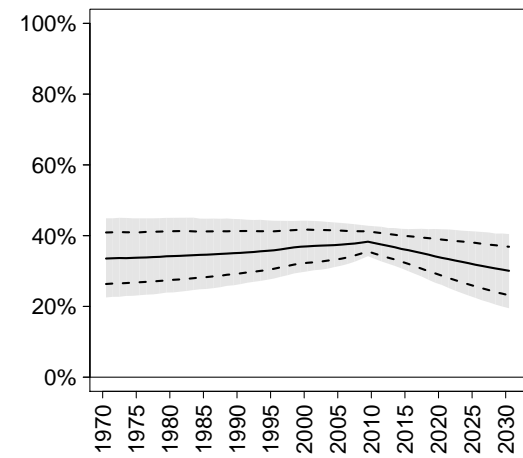

**Total demand**

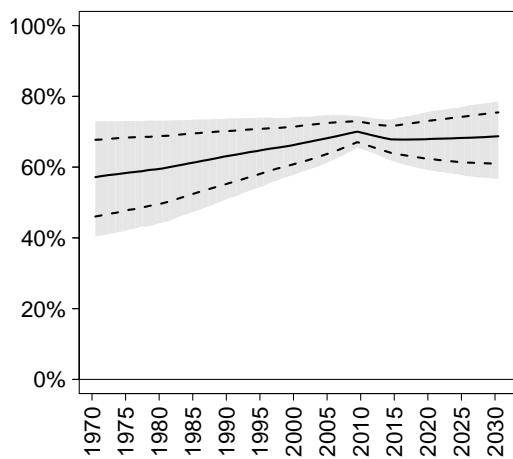

**Demand satisfied (any method)**

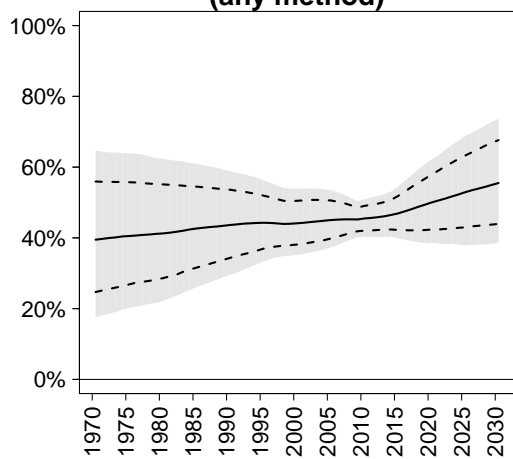

**Demand satisfied (modern methods)**

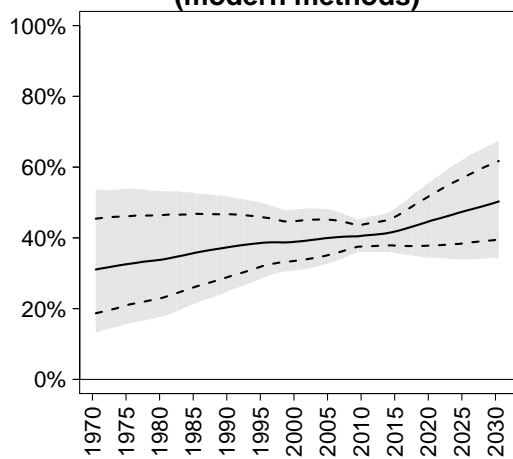

### **3 Women of reproductive age irrespective of marital status**

#### **3.1 Countries and areas**

Afghanistan --- All women

**CP (any)**

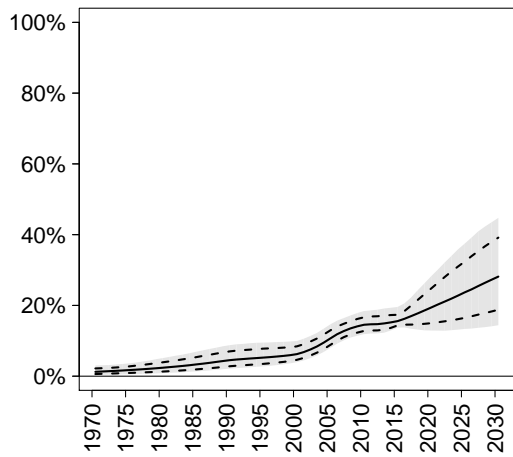

**CP (modern)**

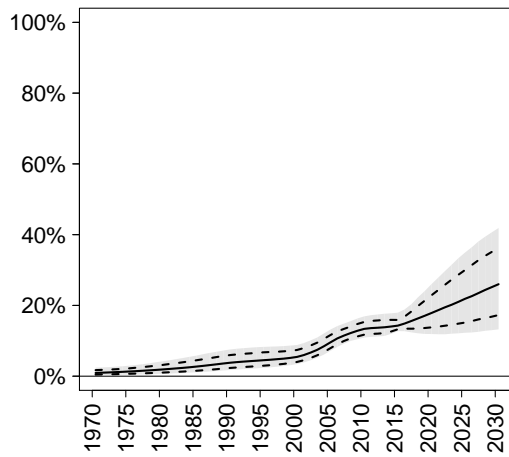

**CP (traditional)**

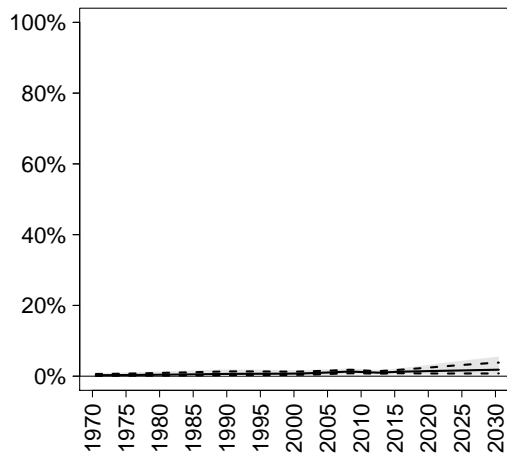

**Unmet need among all unmarried women**

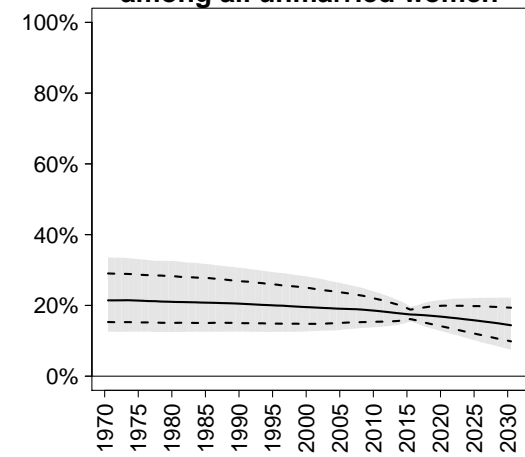

**Total demand**

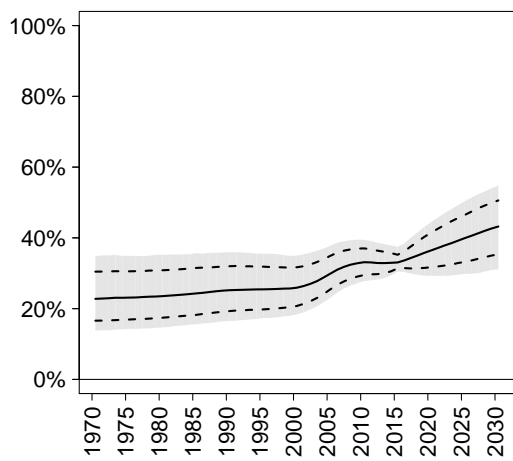

**Demand satisfied (any method)**

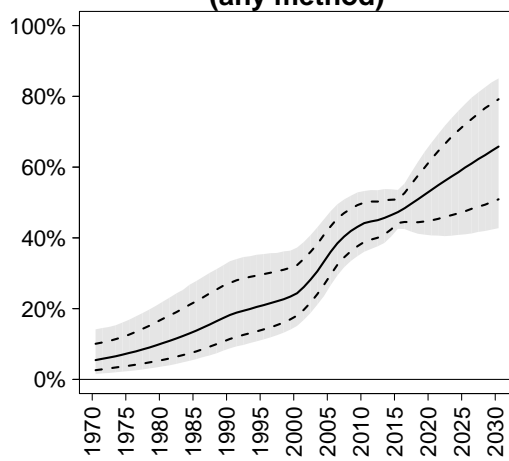

**Demand satisfied (modern methods)**

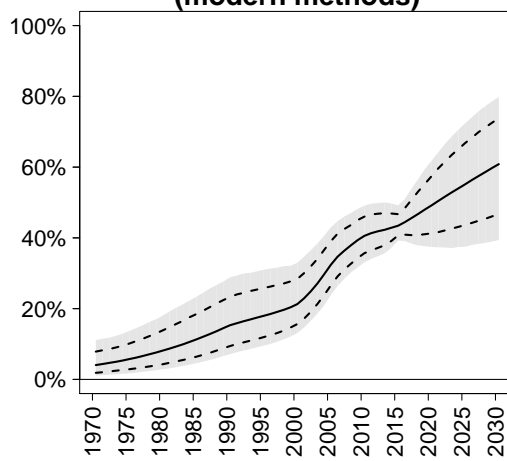

Albania --- All women

**CP (any)**

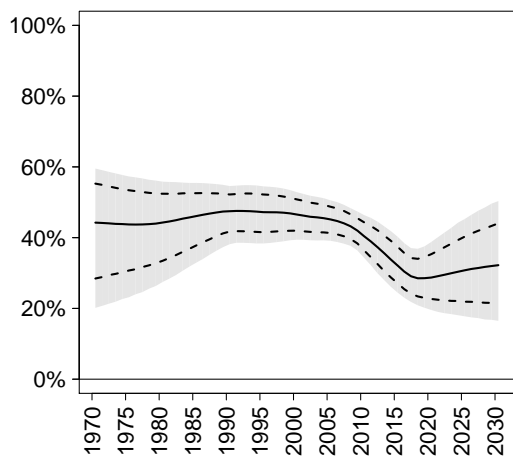

**CP (modern)**

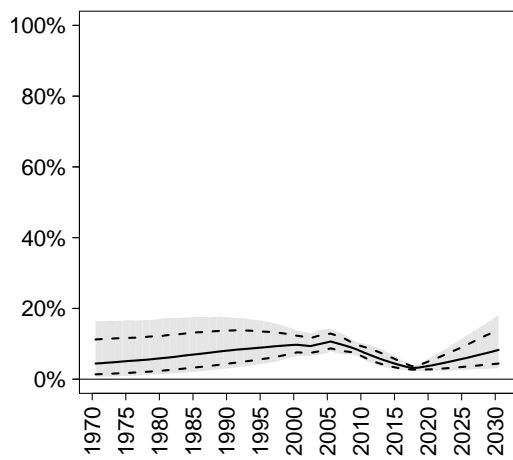

**CP (traditional)**

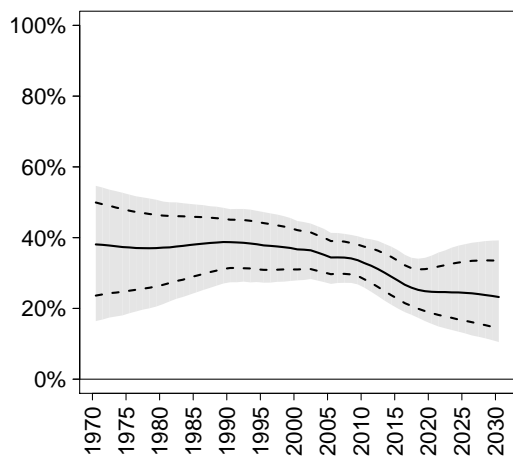

**Unmet need among all unmarried women**

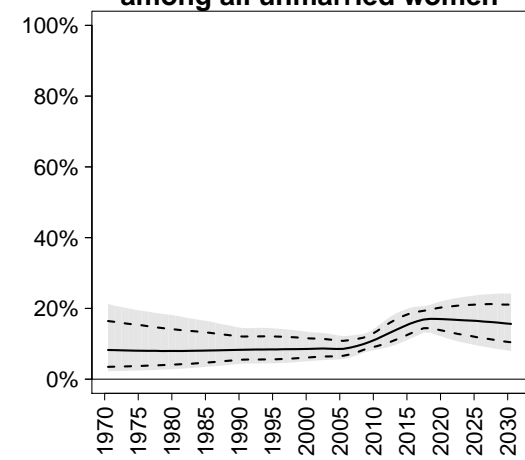

**Total demand**

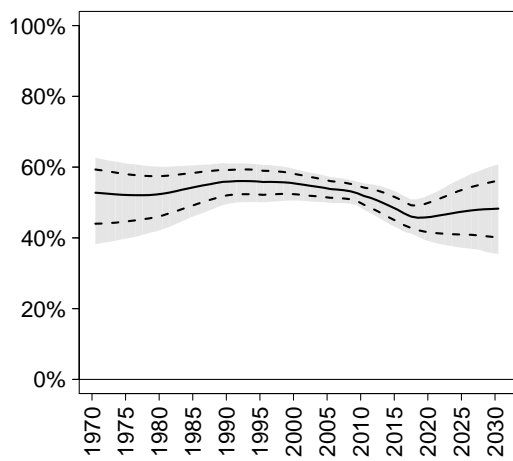

**Demand satisfied (any method)**

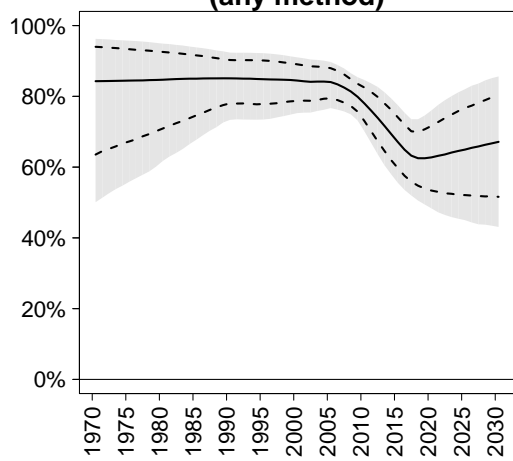

**Demand satisfied (modern methods)**

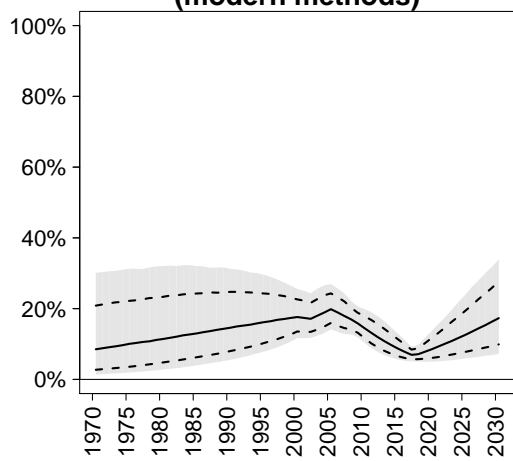

Algeria --- All women

**CP (any)**

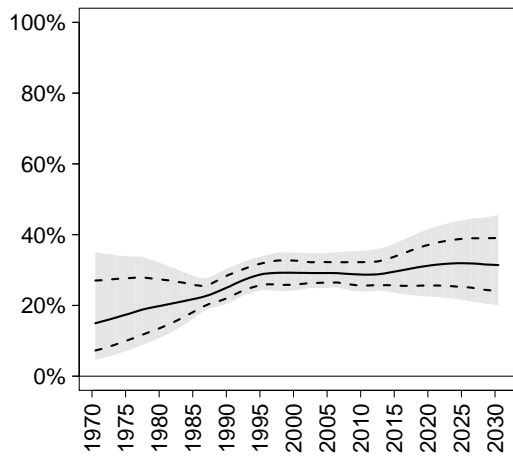

**CP (modern)**

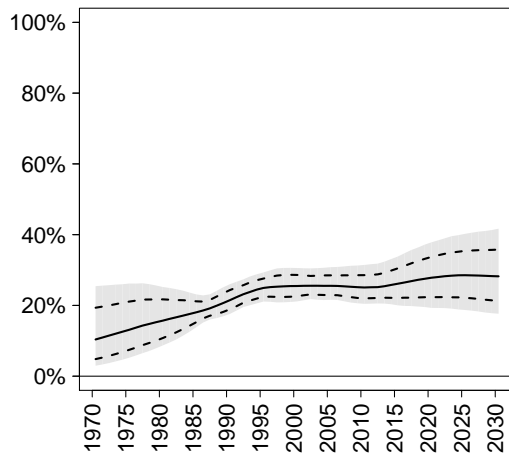

**CP (traditional)**

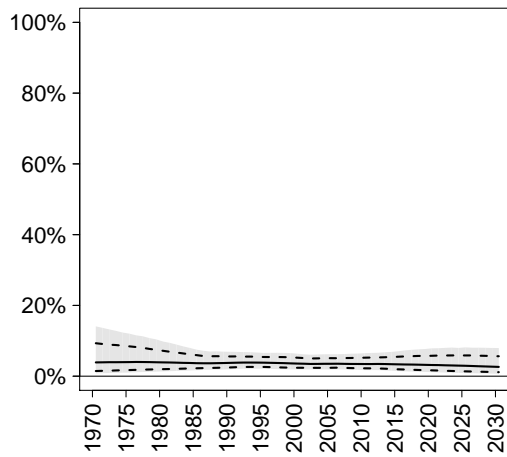

**Unmet need among all unmarried women**

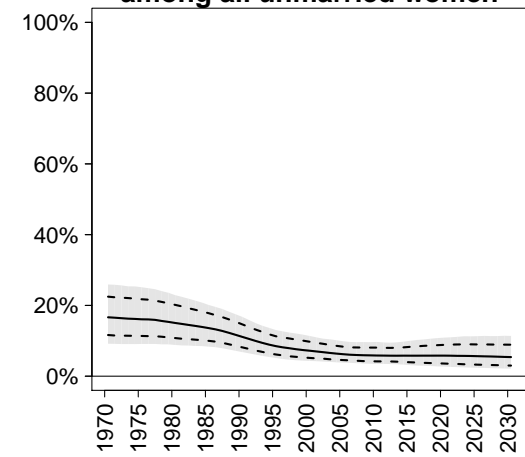

**Total demand**

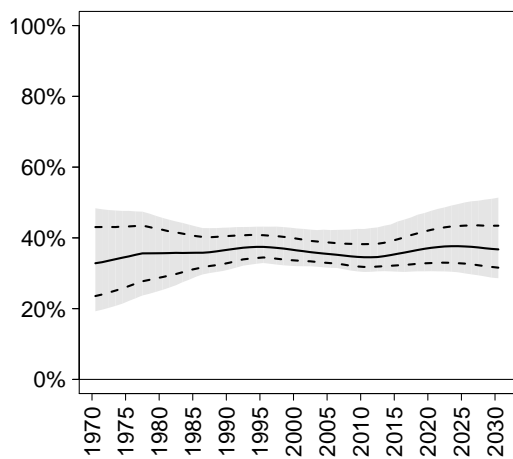

**Demand satisfied (any method)**

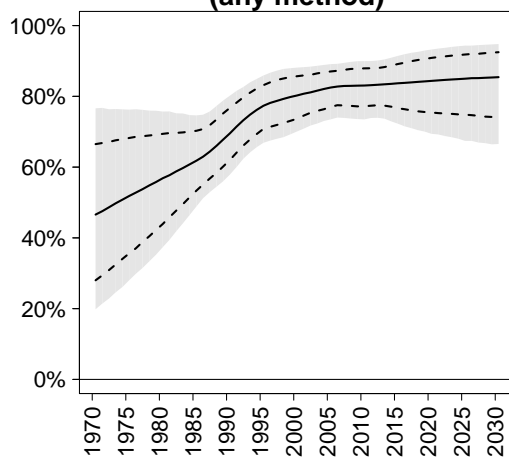

**Demand satisfied (modern methods)**

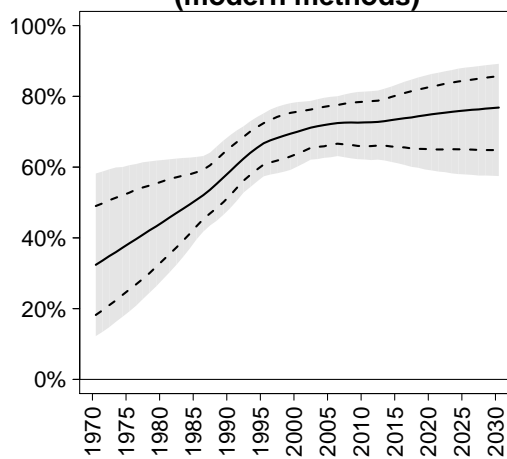

Angola --- All women

**CP (any)**

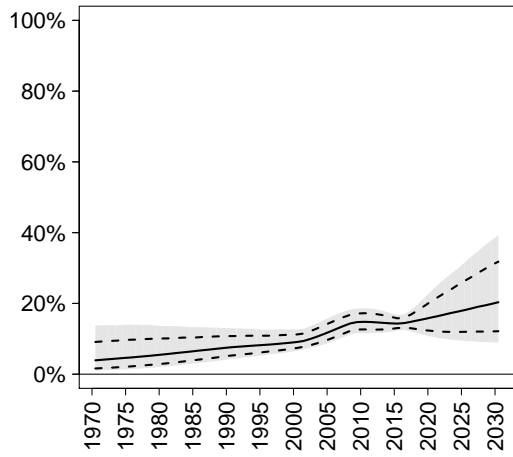

**CP (modern)**

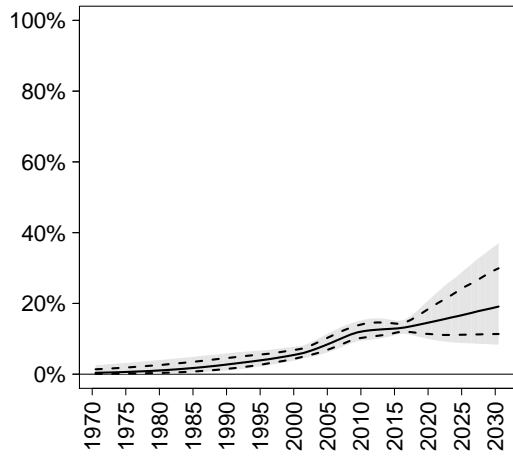

**CP (traditional)**

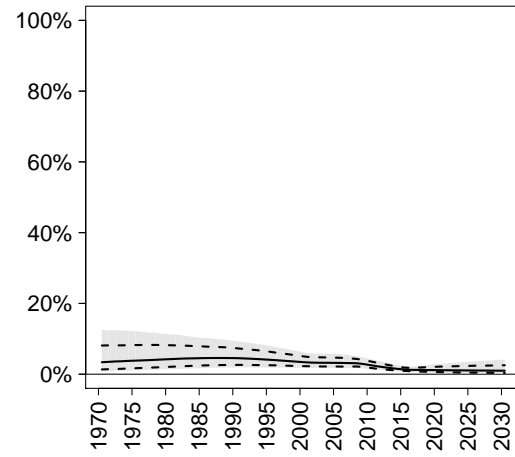

**Unmet need among all unmarried women**

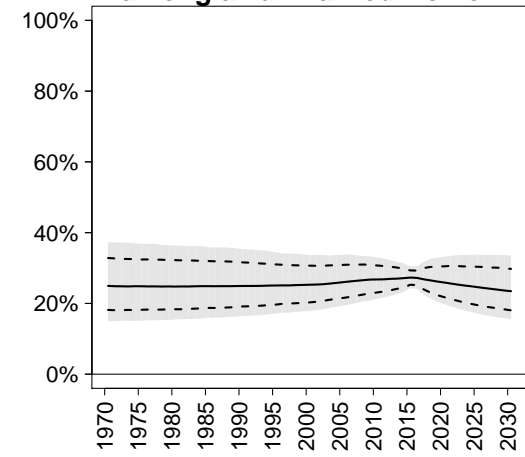

**Total demand**

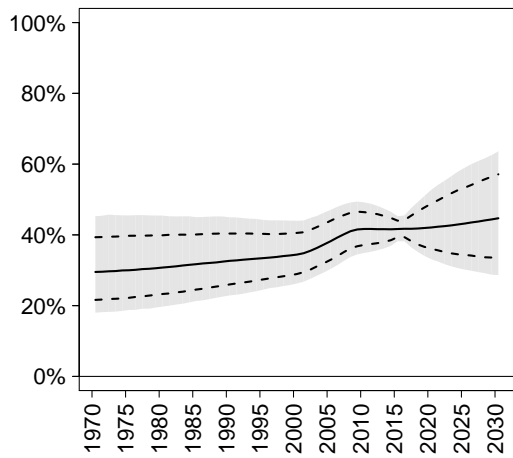

**Demand satisfied (any method)**

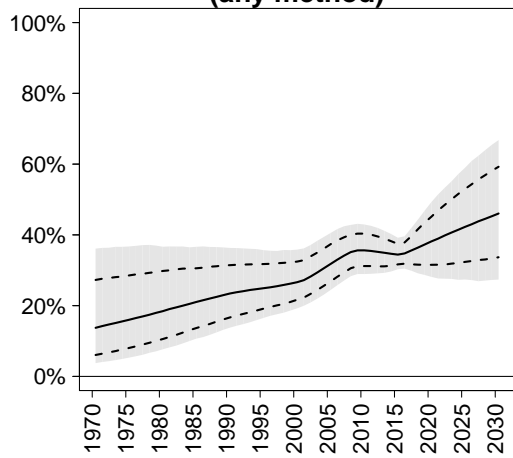

**Demand satisfied (modern methods)**

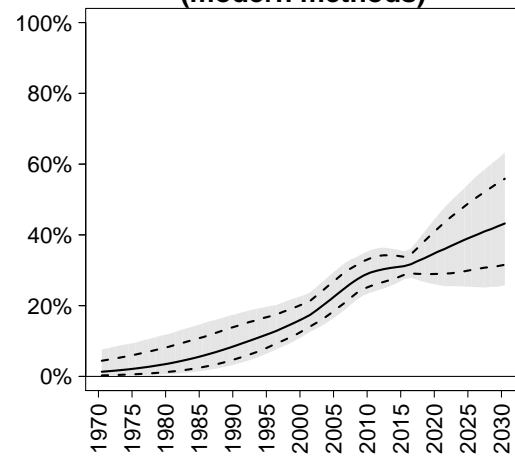

Antigua and Barbuda --- All women

**CP (any)**

**CP (modern)**

**CP (traditional)**

**Unmet need  
among all unmarried women**

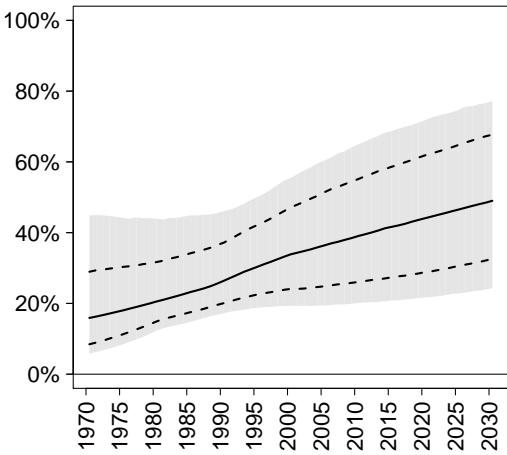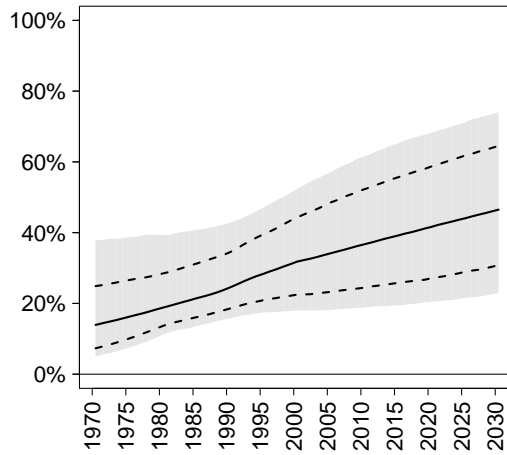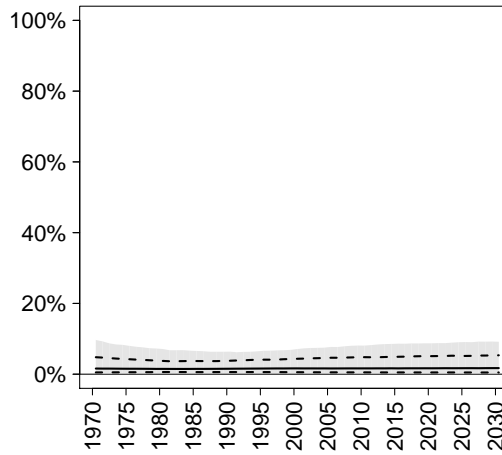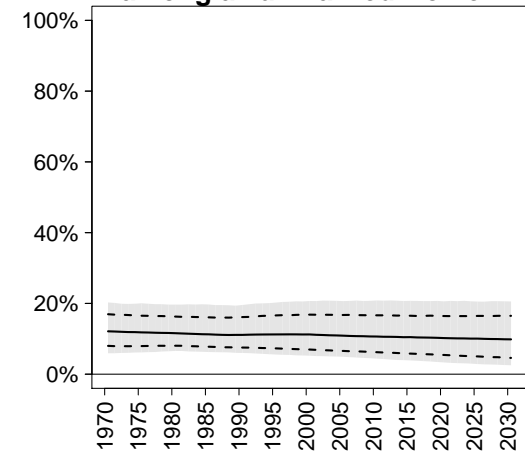

**Total demand**

**Demand satisfied  
(any method)**

**Demand satisfied  
(modern methods)**

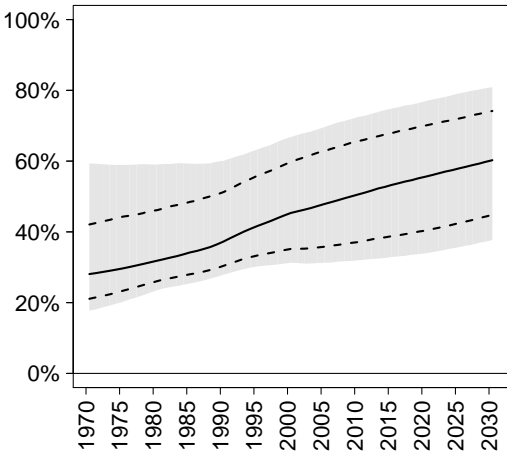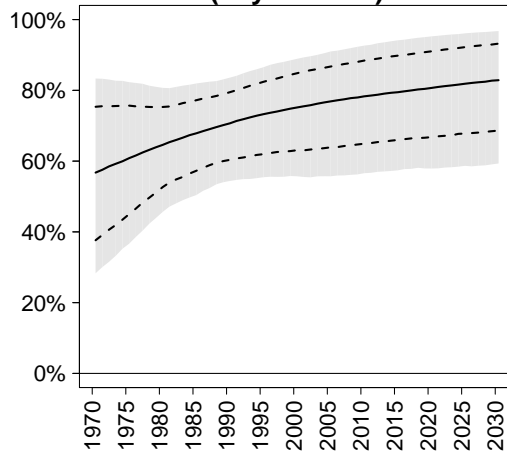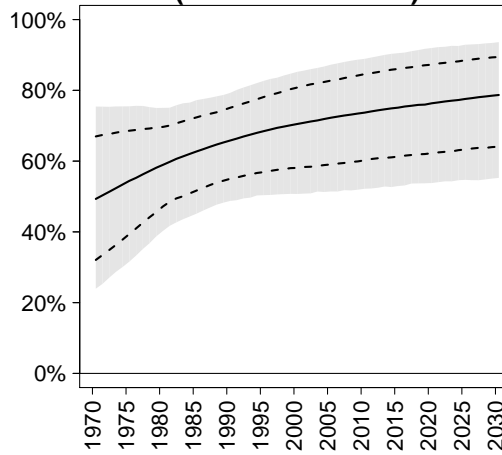

Argentina --- All women

**CP (any)**

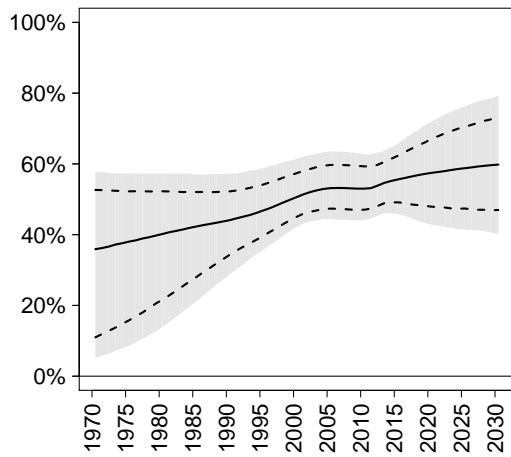

**CP (modern)**

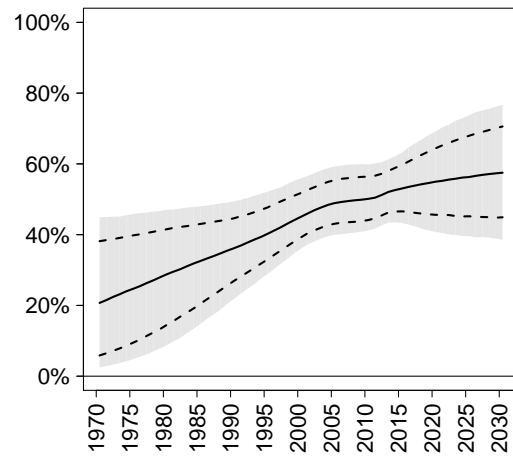

**CP (traditional)**

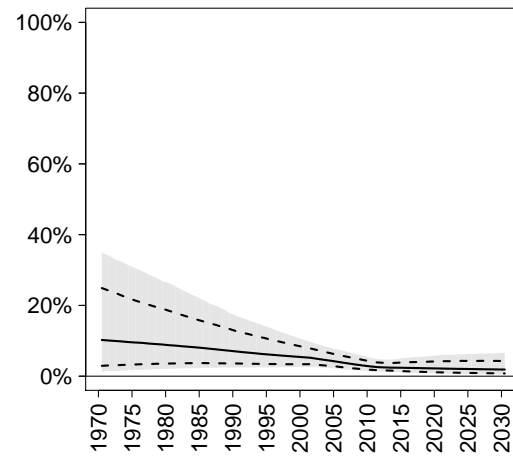

**Unmet need among all unmarried women**

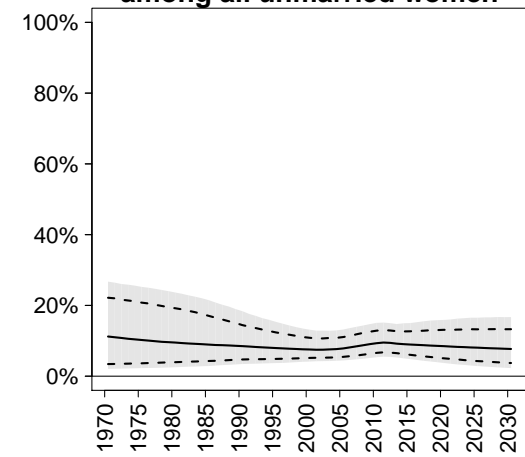

**Total demand**

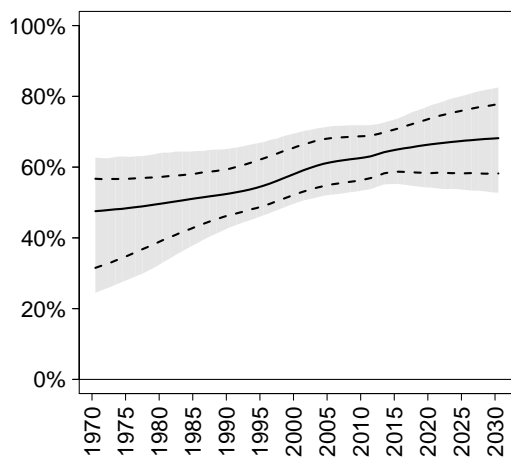

**Demand satisfied (any method)**

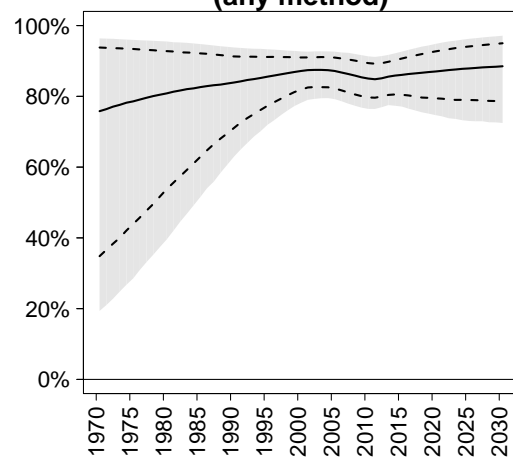

**Demand satisfied (modern methods)**

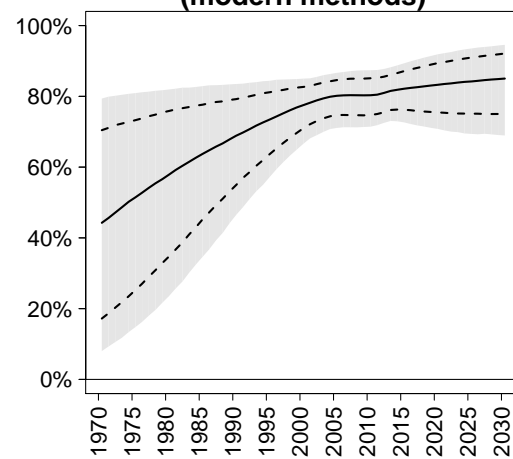



Armenia --- All women

**CP (any)**

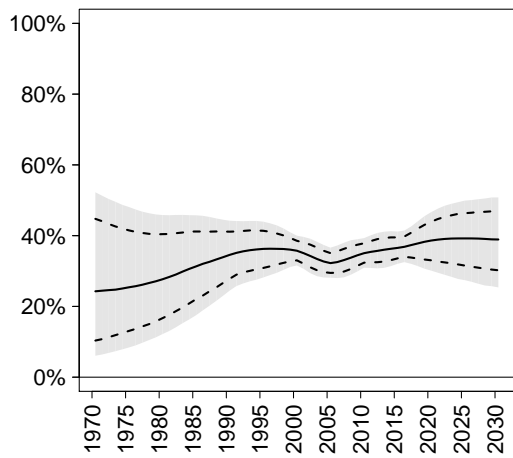

**CP (modern)**

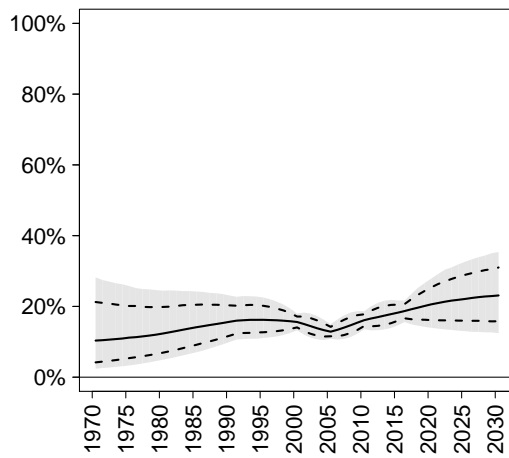

**CP (traditional)**

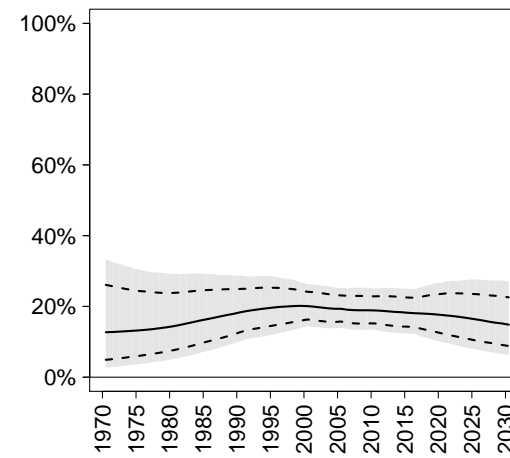

**Unmet need among all unmarried women**

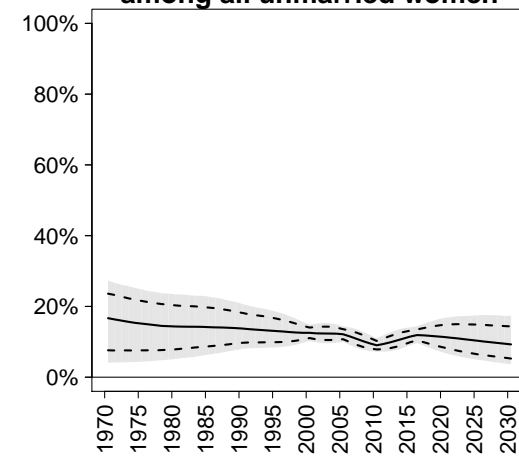

**Total demand**

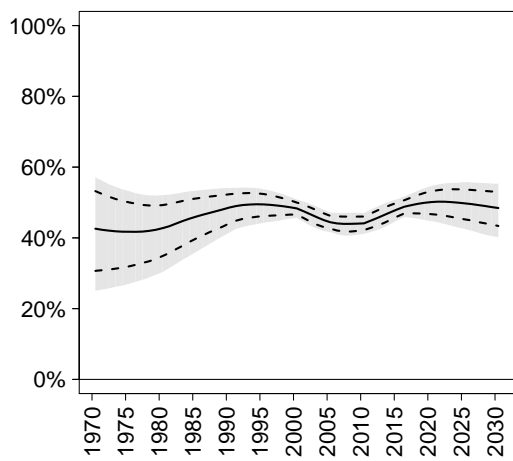

**Demand satisfied (any method)**

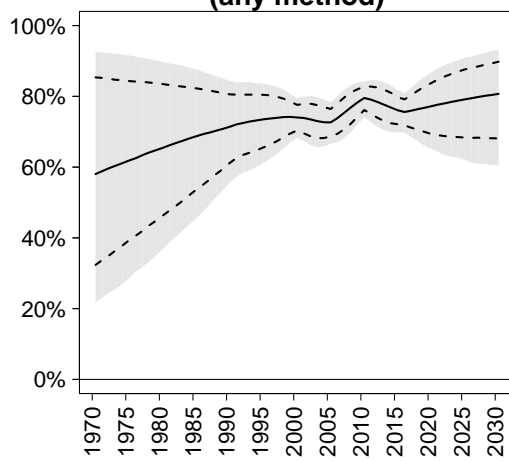

**Demand satisfied (modern methods)**

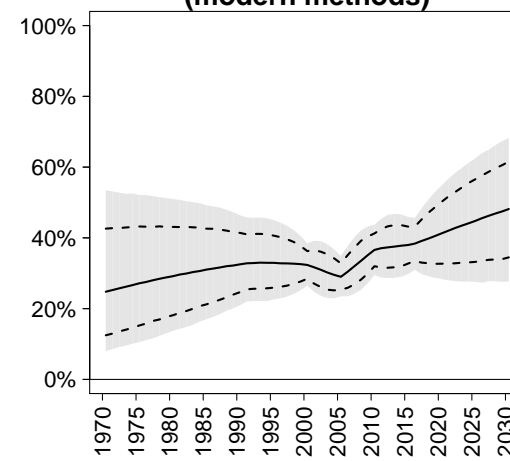

Australia --- All women

**CP (any)**

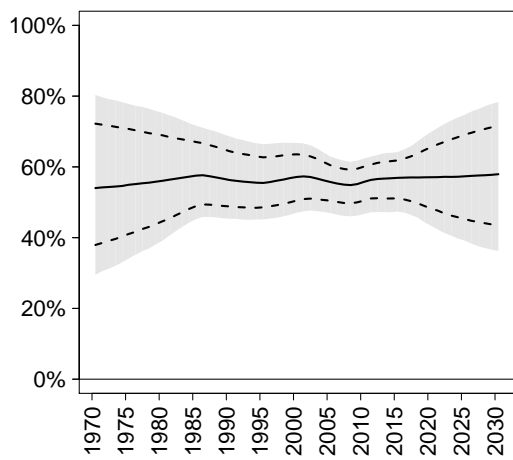

**CP (modern)**

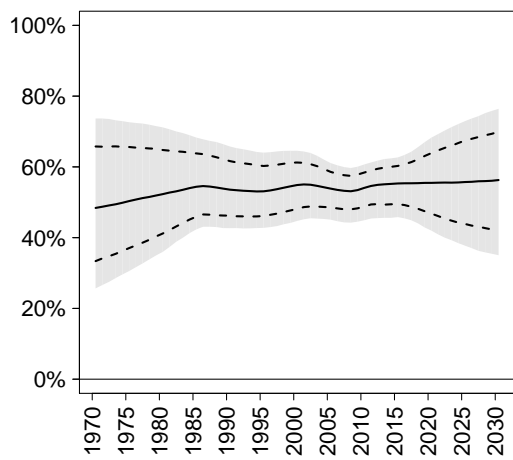

**CP (traditional)**

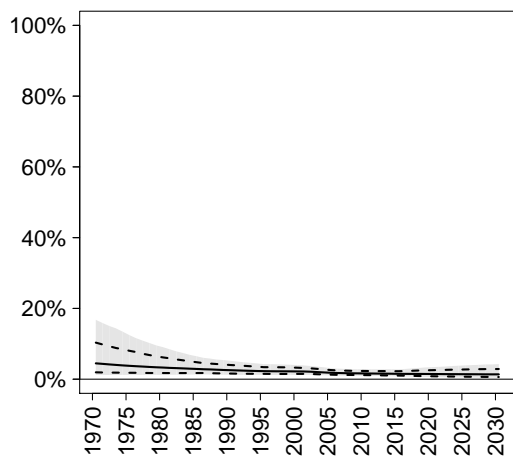

**Unmet need among all unmarried women**

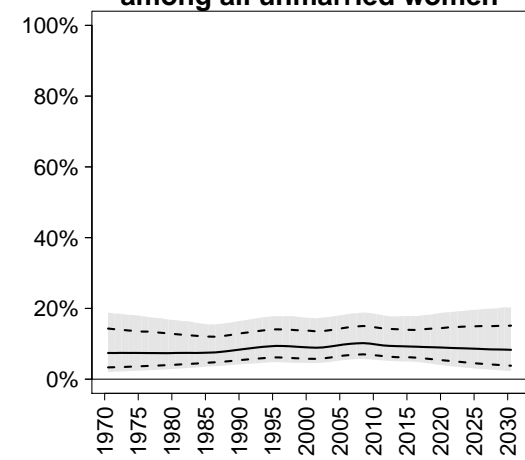

**Total demand**

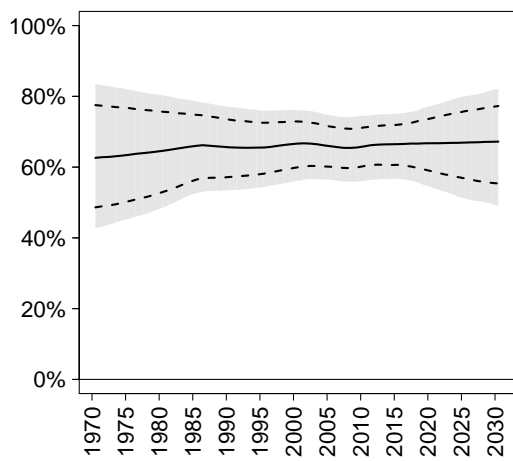

**Demand satisfied (any method)**

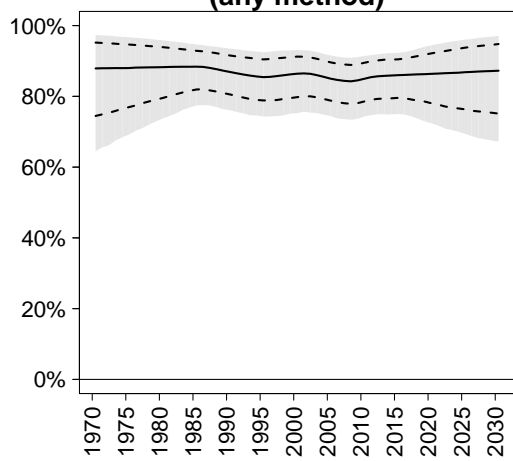

**Demand satisfied (modern methods)**

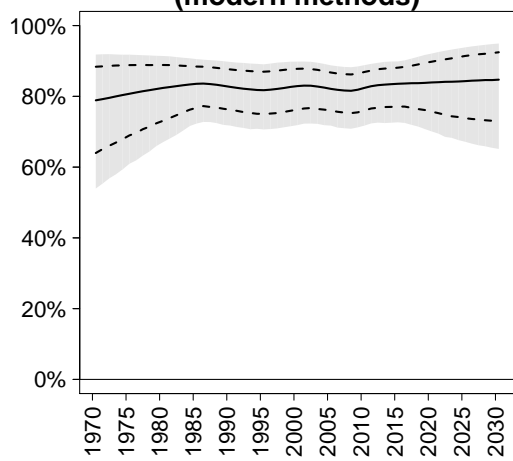

Austria --- All women

**CP (any)**

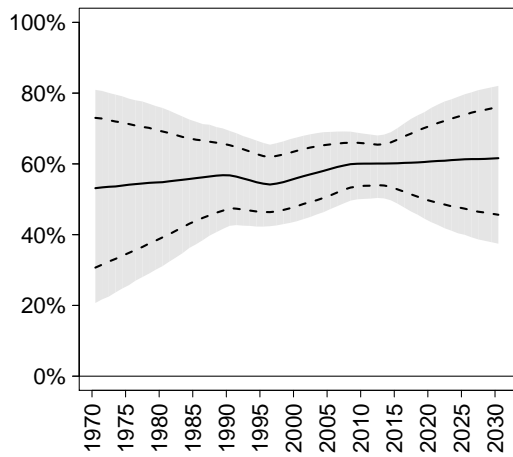

**CP (modern)**

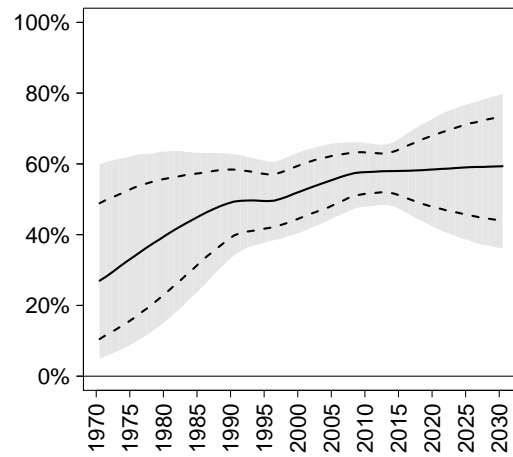

**CP (traditional)**

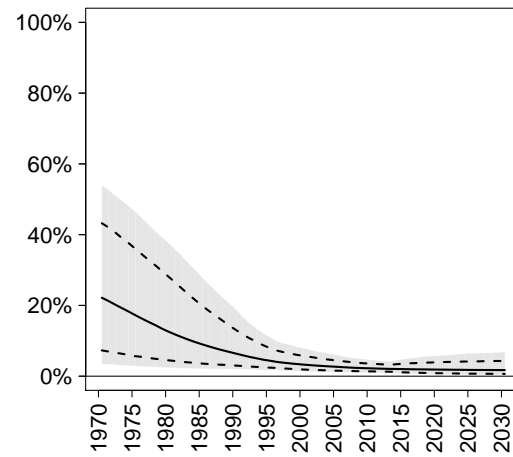

**Unmet need among all unmarried women**

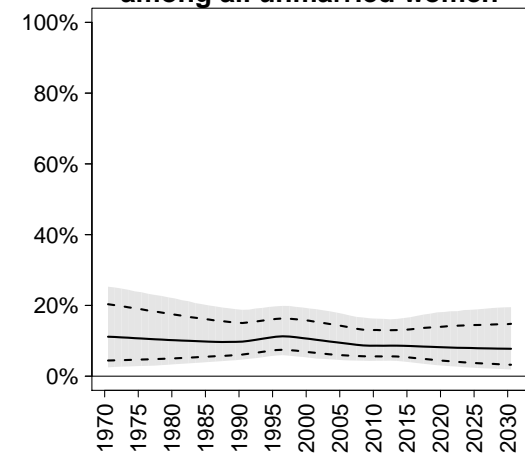

**Total demand**

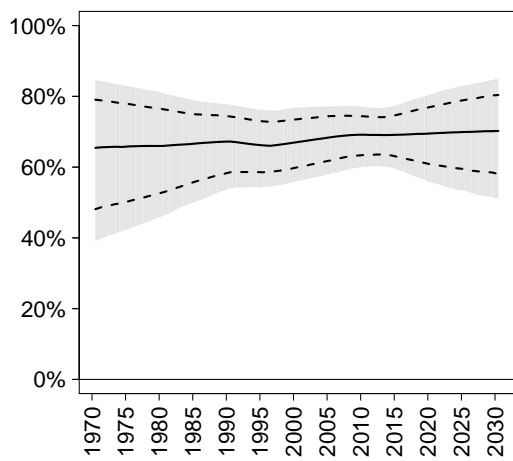

Azerbaijan --- All women

**CP (any)**

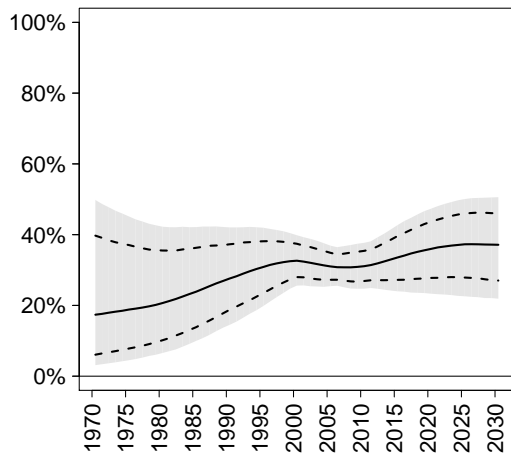

**CP (modern)**

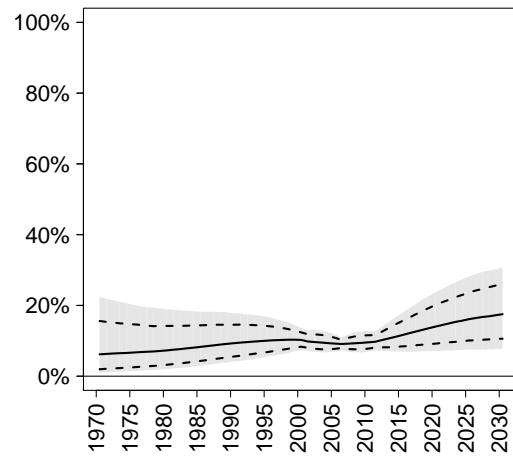

**CP (traditional)**

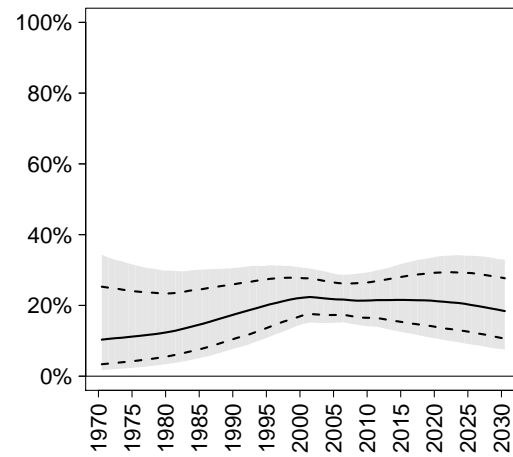

**Unmet need among all unmarried women**

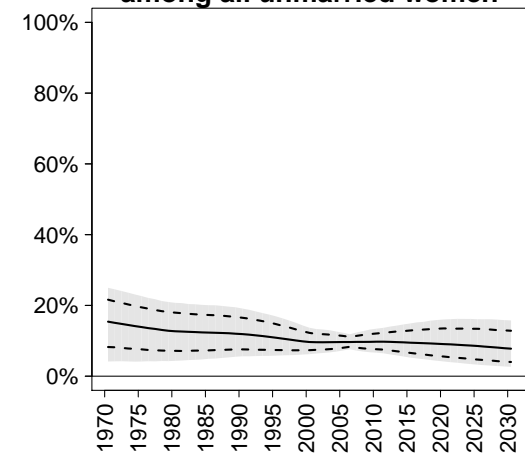

**Total demand**

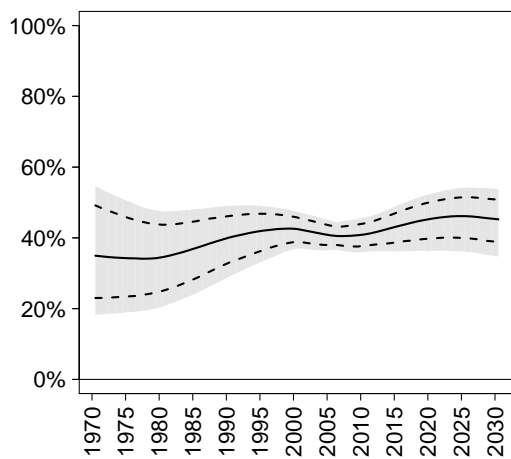

**Demand satisfied (any method)**

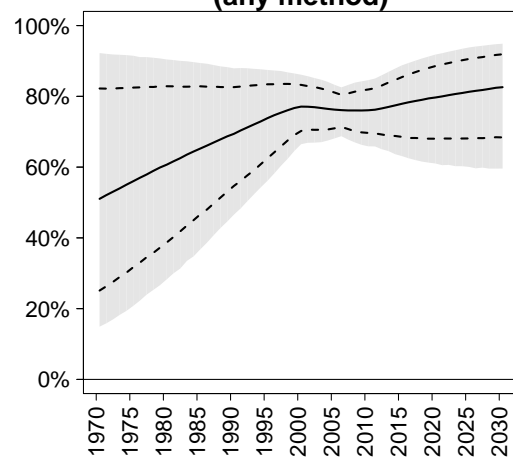

**Demand satisfied (modern methods)**

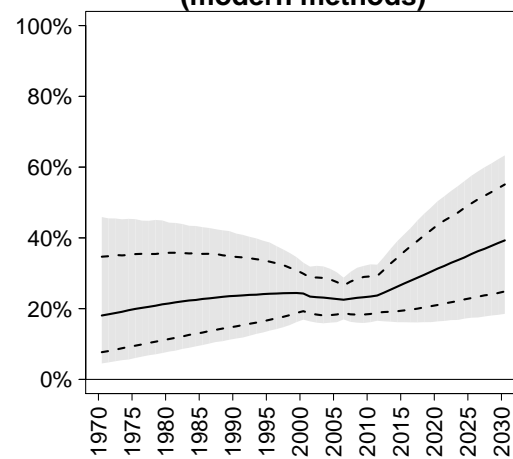

Bahamas --- All women

**CP (any)**

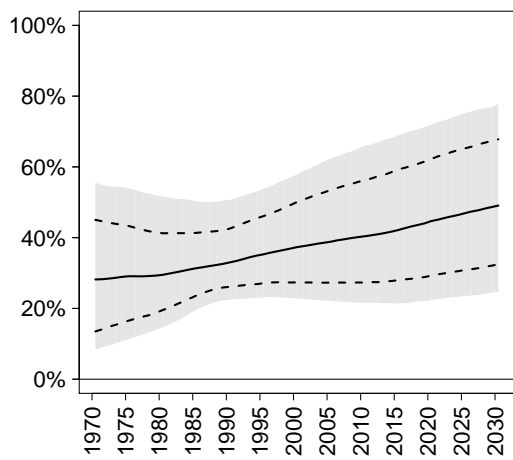

**CP (modern)**

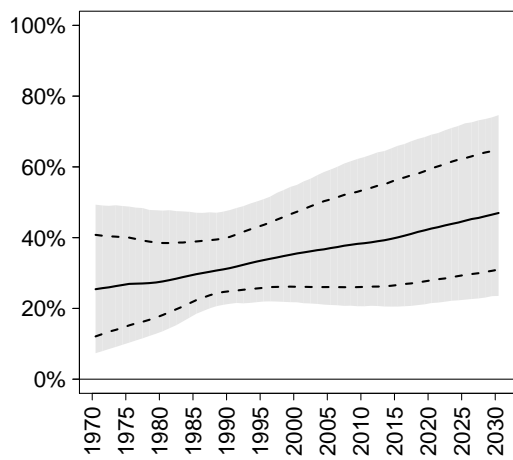

**CP (traditional)**

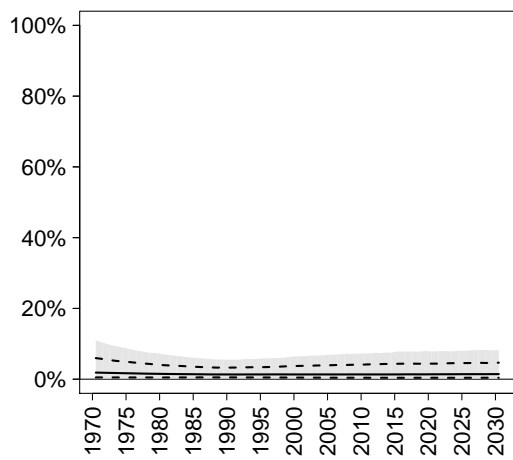

**Unmet need among all unmarried women**

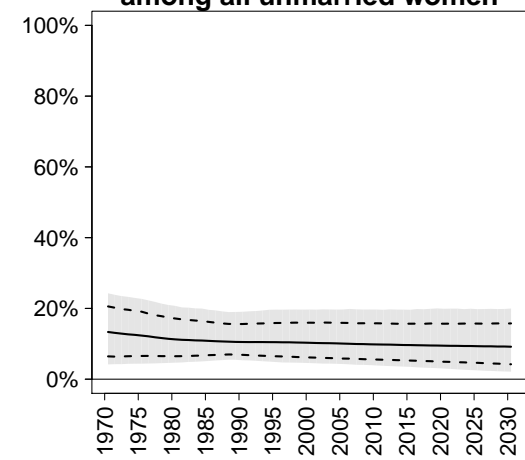

**Total demand**

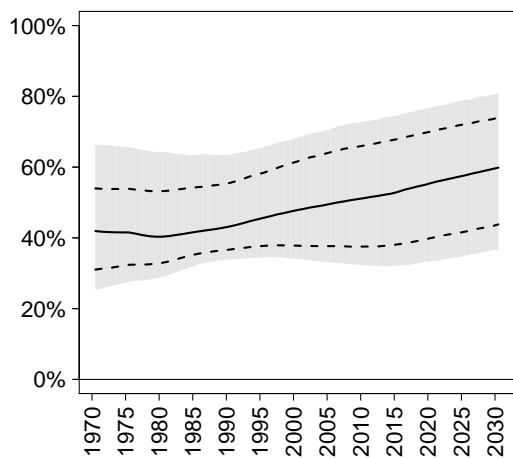

Bahrain --- All women

**CP (any)**

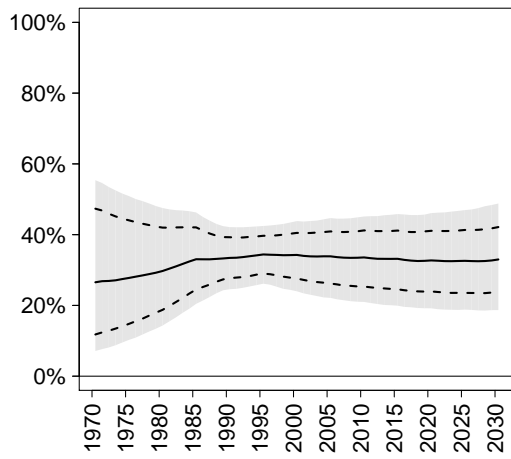

**CP (modern)**

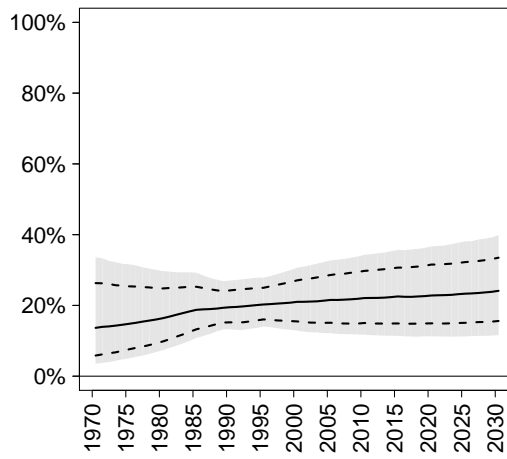

**CP (traditional)**

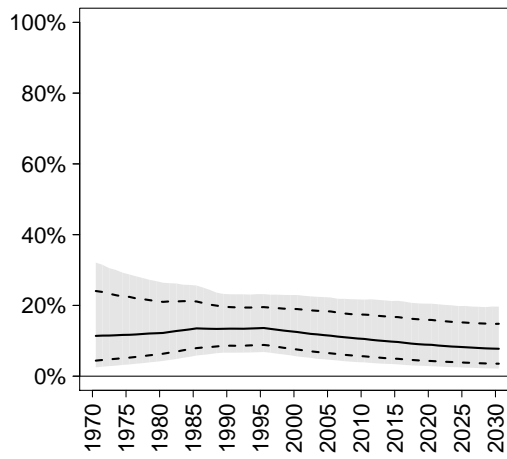

**Unmet need among all unmarried women**

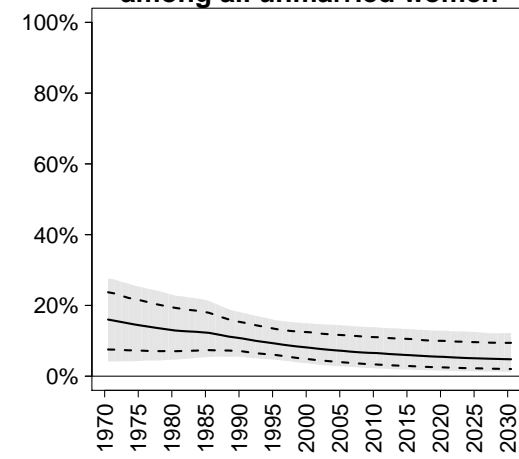

**Total demand**

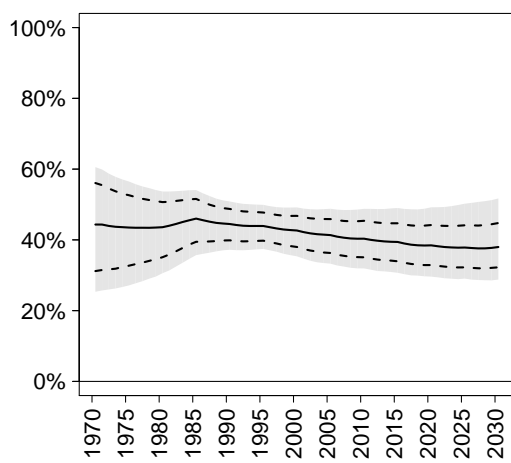

**Demand satisfied (any method)**

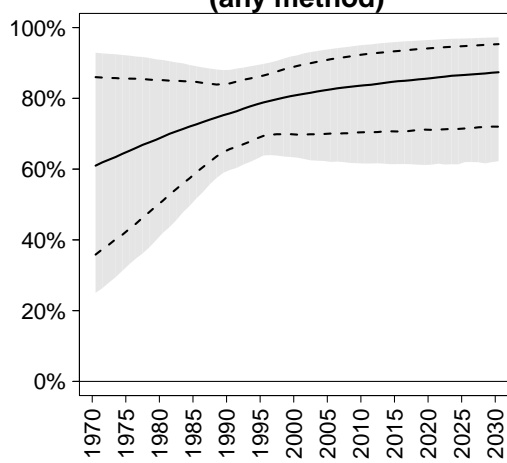

**Demand satisfied (modern methods)**

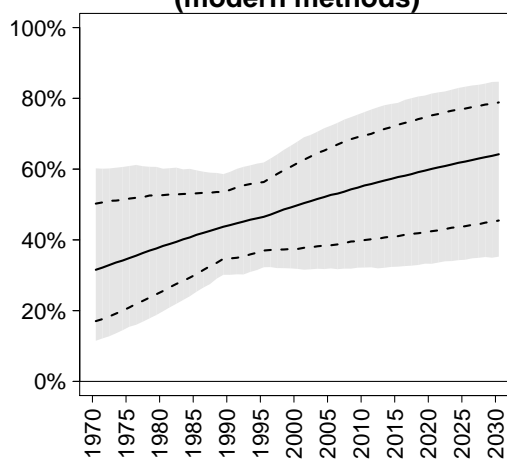

Bangladesh --- All women

**CP (any)**

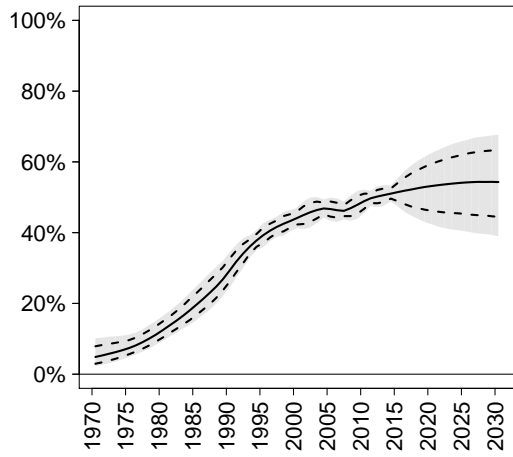

**CP (modern)**

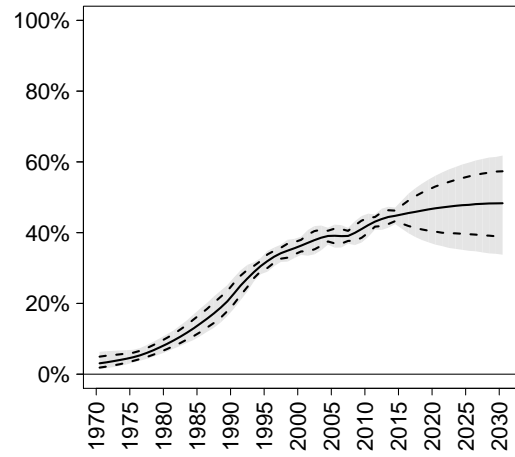

**CP (traditional)**

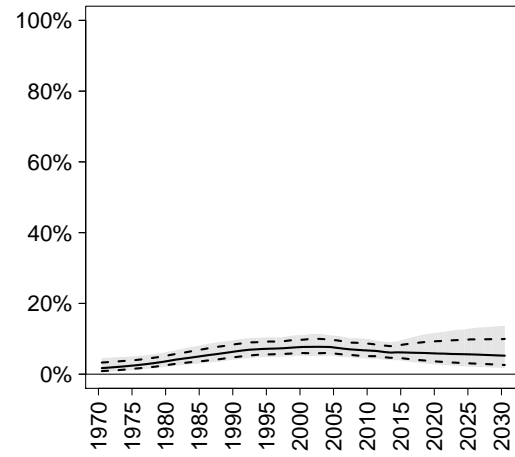

**Unmet need among all unmarried women**

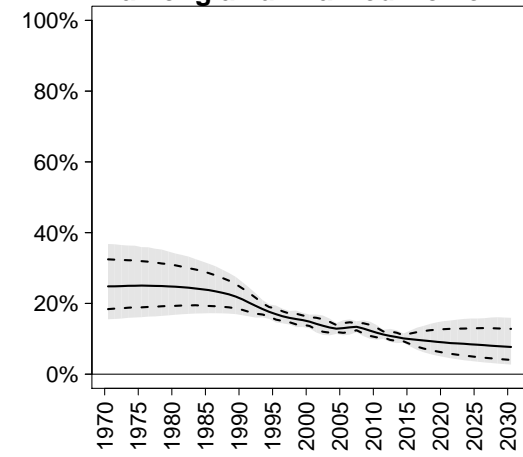

**Total demand**

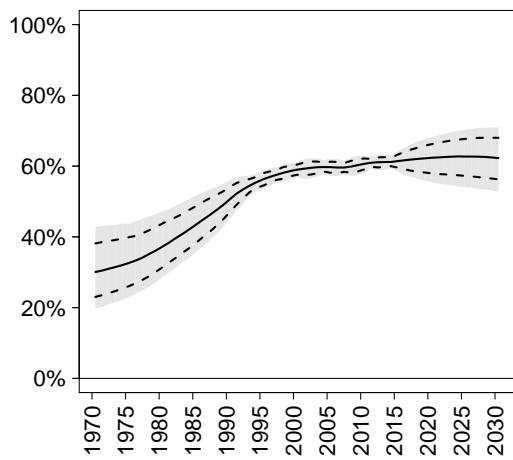

Barbados --- All women

**CP (any)**

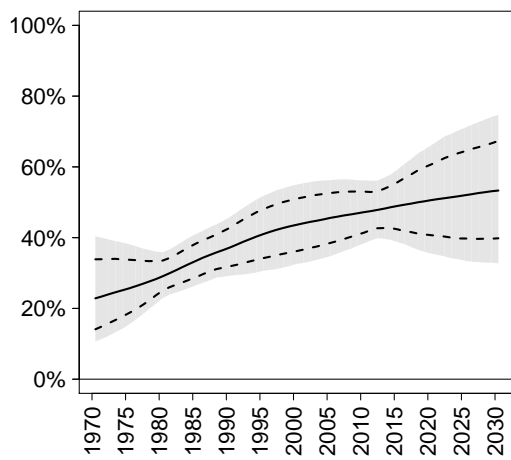

**CP (modern)**

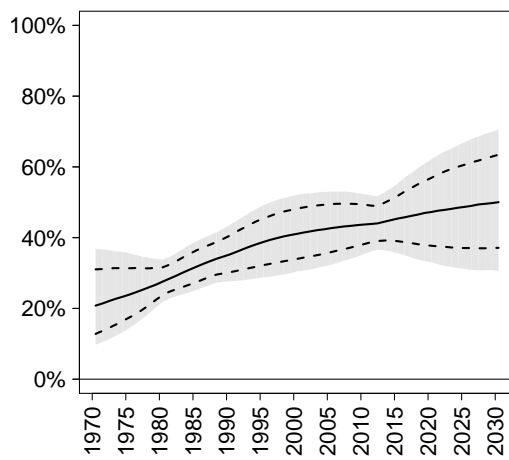

**CP (traditional)**

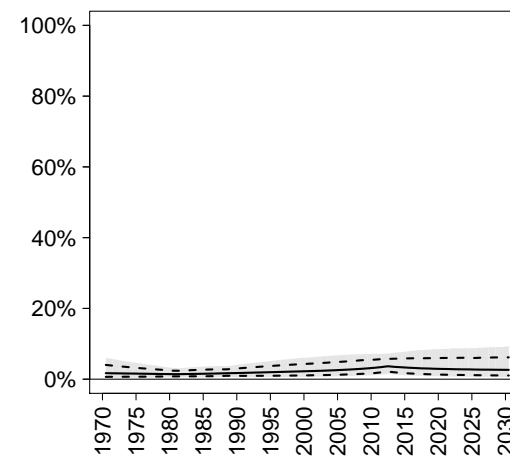

**Unmet need among all unmarried women**

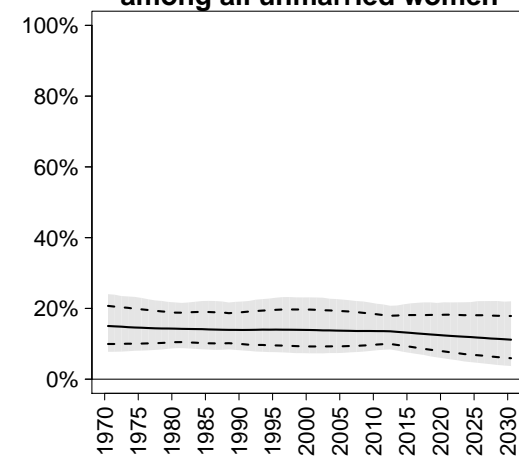

**Total demand**

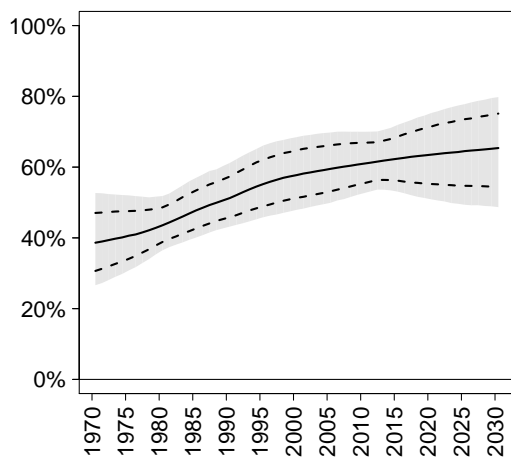

**Demand satisfied (any method)**

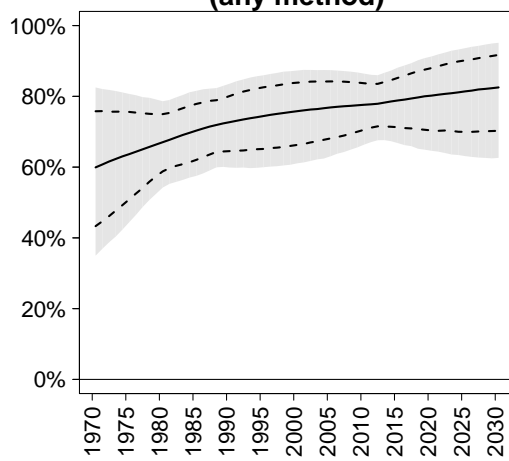

**Demand satisfied (modern methods)**

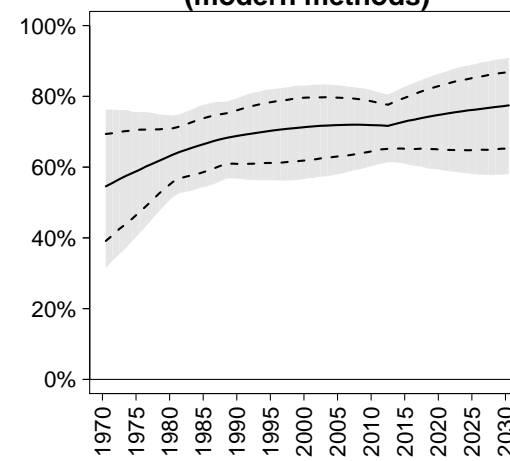



Belarus --- All women

**CP (any)**

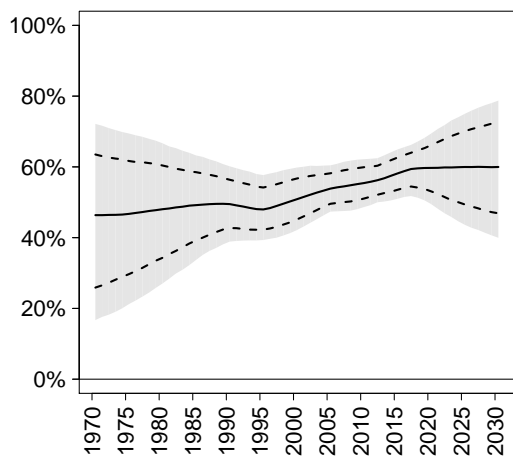

**CP (modern)**

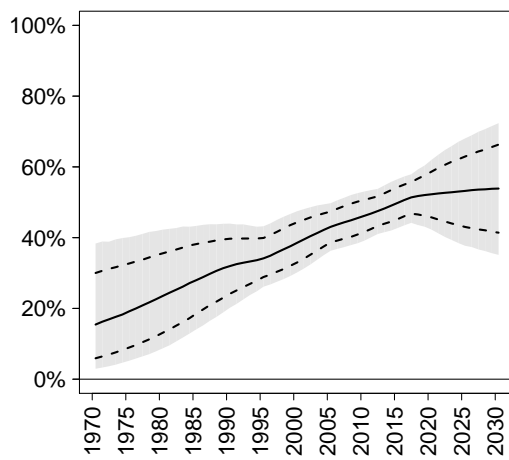

**CP (traditional)**

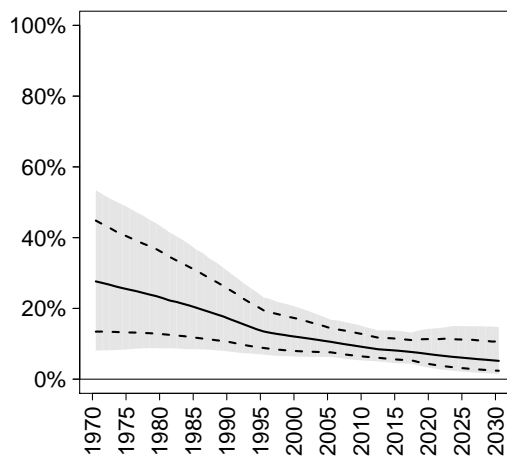

**Unmet need among all unmarried women**

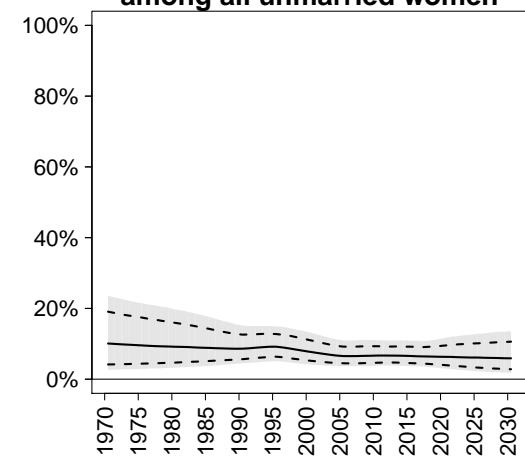

**Total demand**

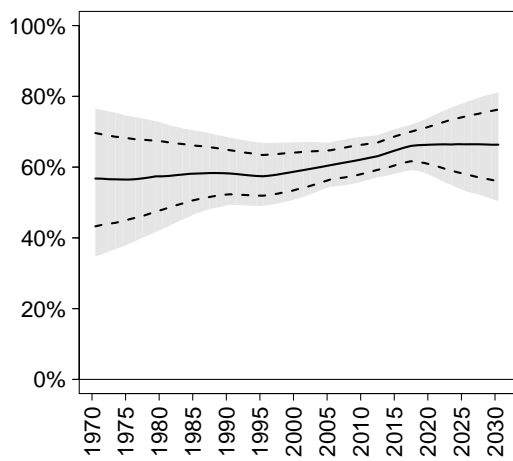

**Demand satisfied (any method)**

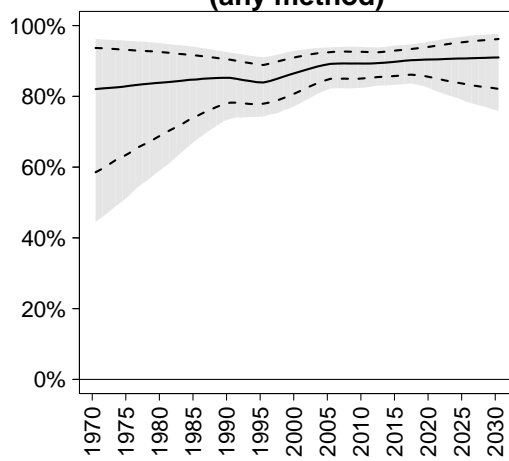

**Demand satisfied (modern methods)**

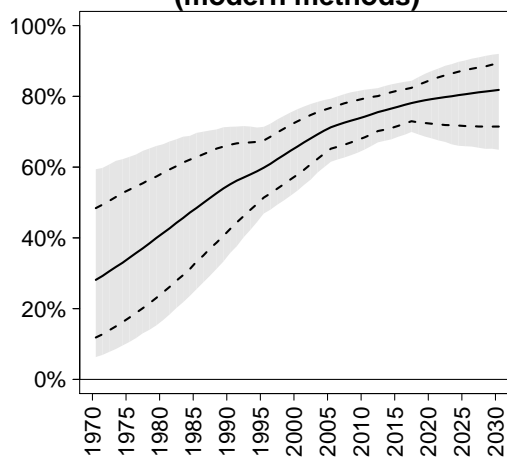

Belgium --- All women

**CP (any)**

**CP (modern)**

**CP (traditional)**

**Unmet need  
among all unmarried women**

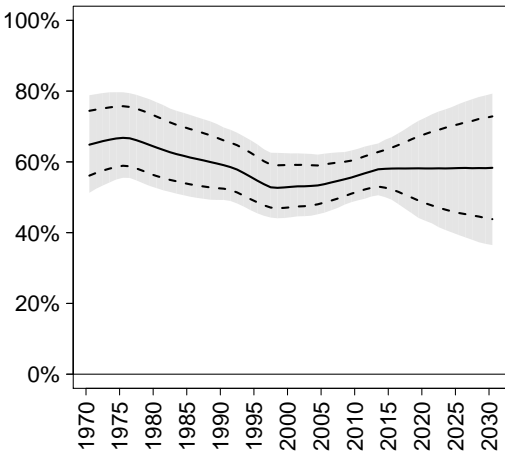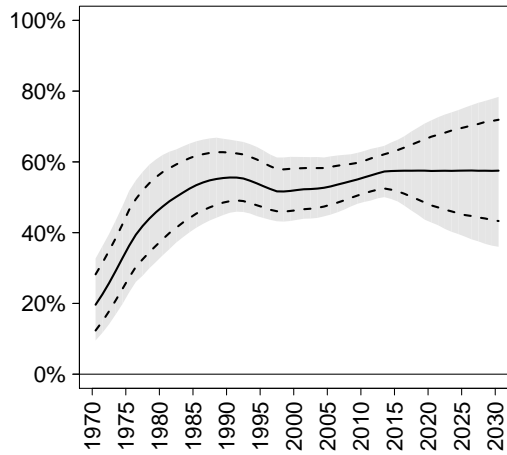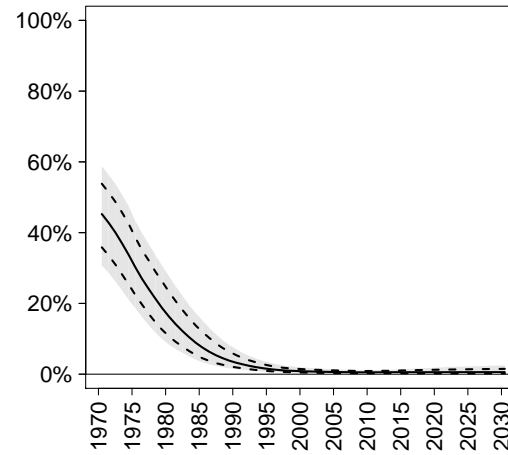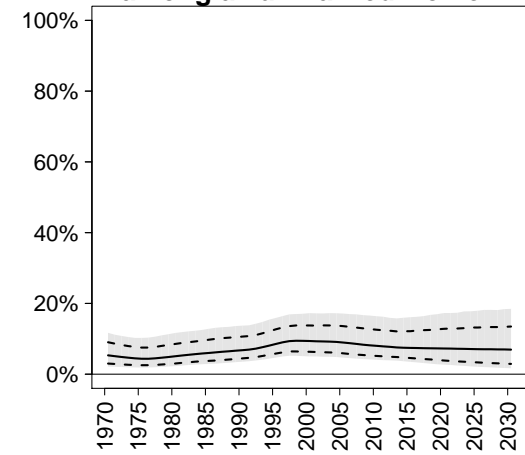

**Total demand**

**Demand satisfied  
(any method)**

**Demand satisfied  
(modern methods)**

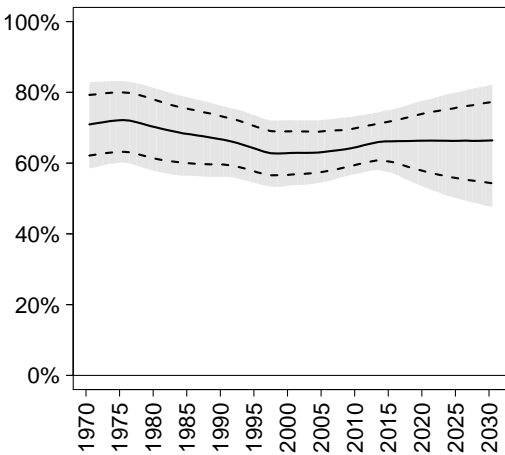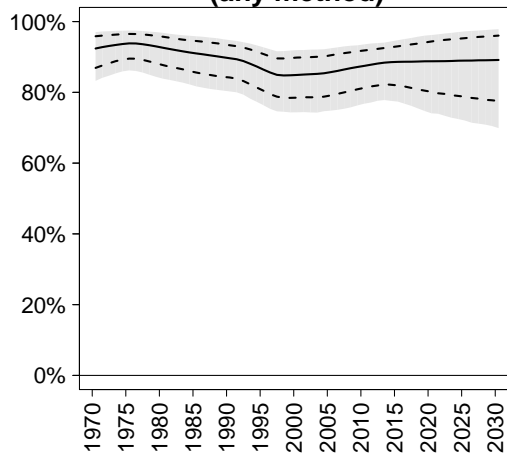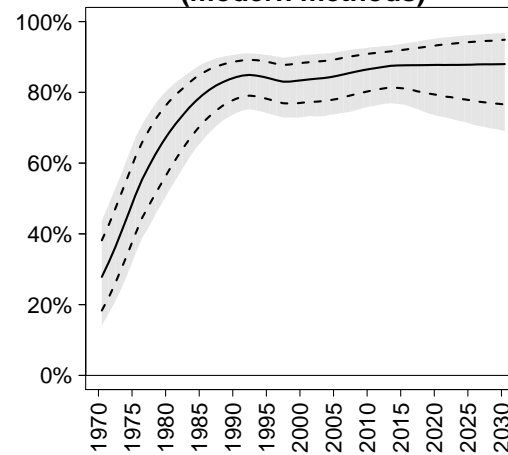

Belize --- All women

**CP (any)**

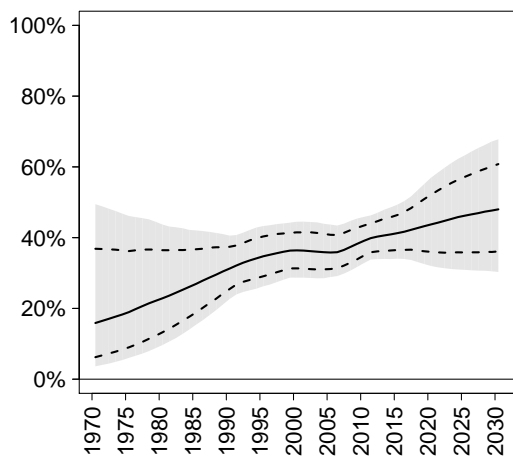

**CP (modern)**

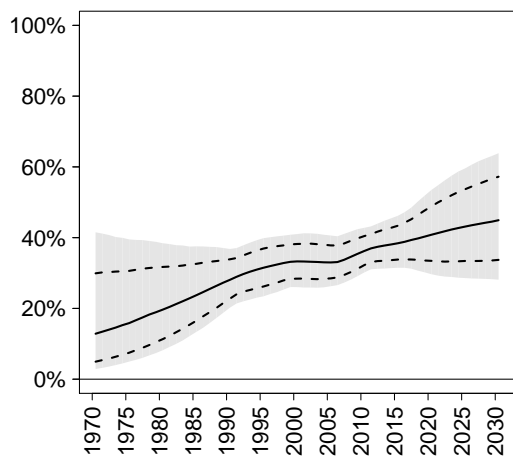

**CP (traditional)**

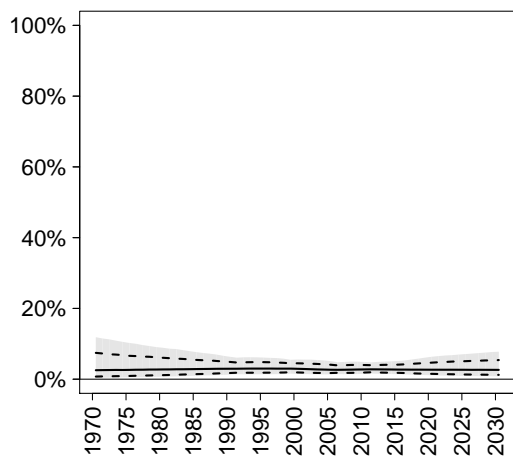

**Unmet need among all unmarried women**

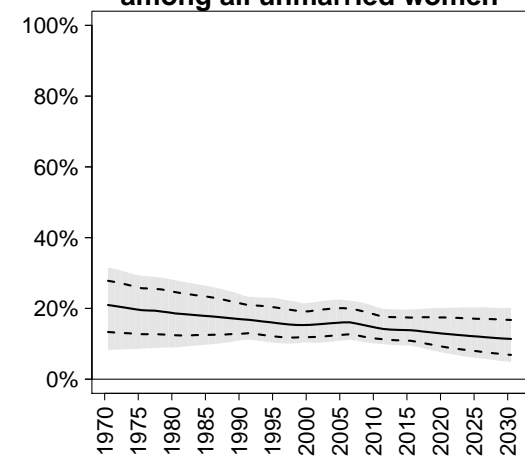

**Total demand**

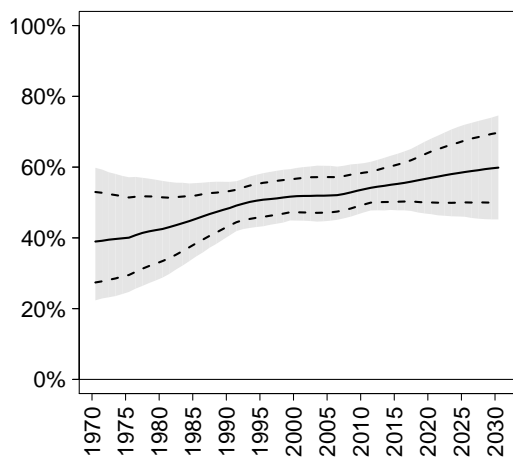

**Demand satisfied (any method)**

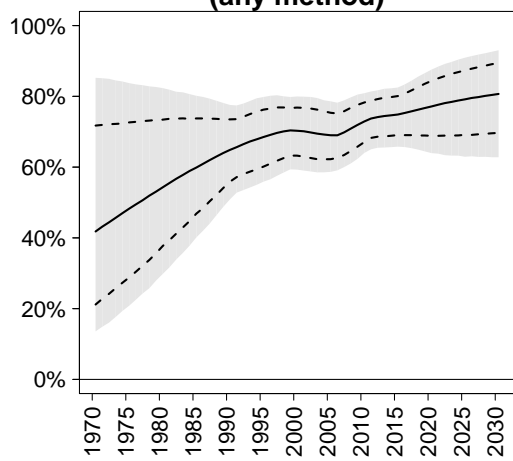

**Demand satisfied (modern methods)**

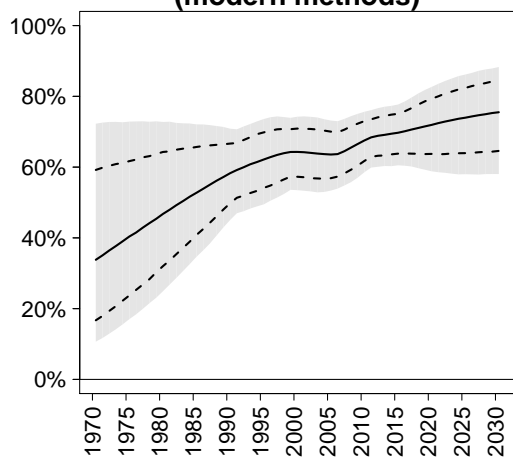

Benin --- All women

**CP (any)**

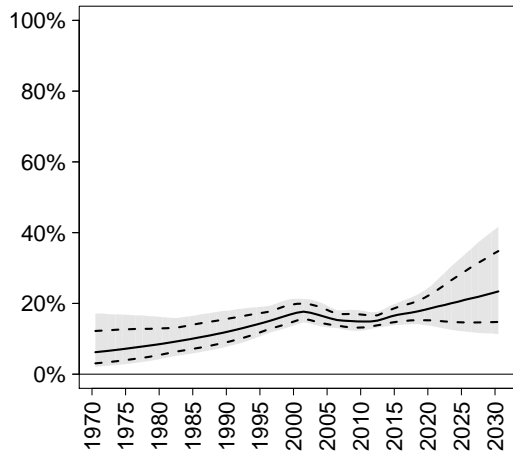

**CP (modern)**

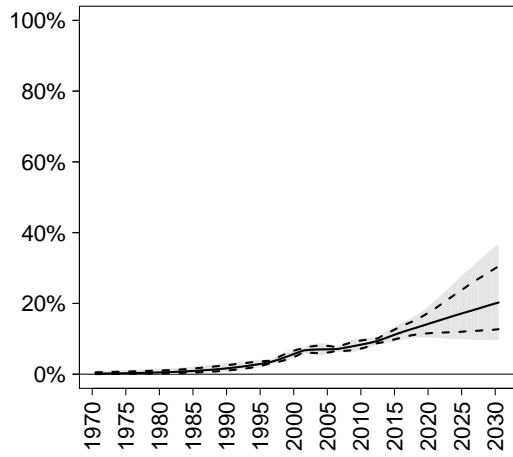

**CP (traditional)**

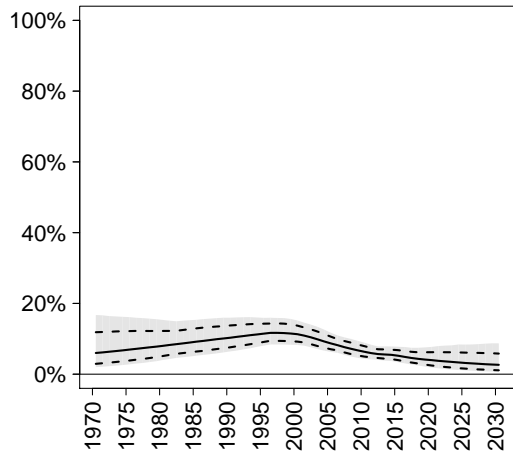

**Unmet need among all unmarried women**

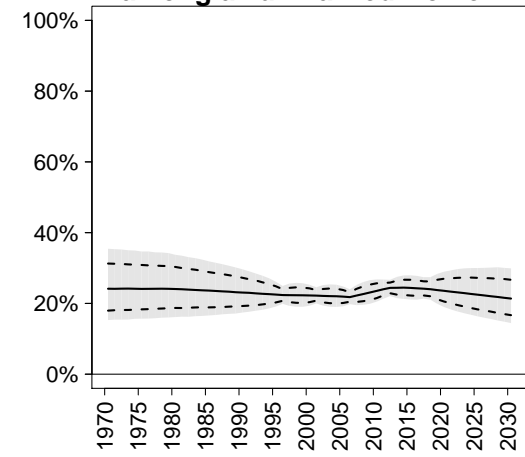

**Total demand**

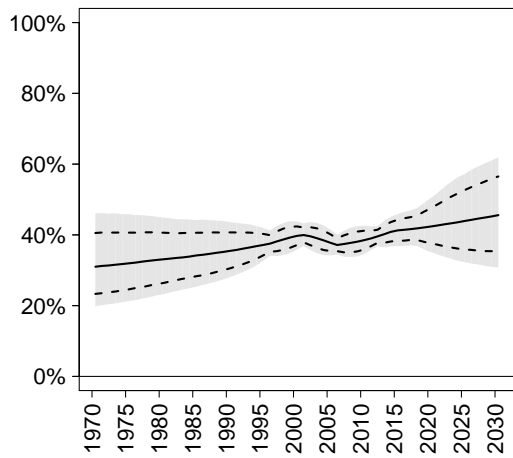

**Demand satisfied (any method)**

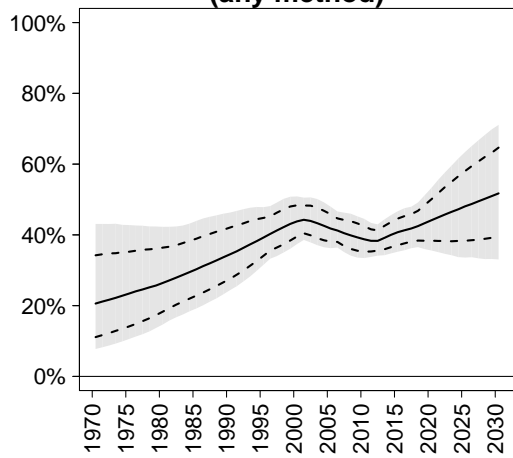

**Demand satisfied (modern methods)**

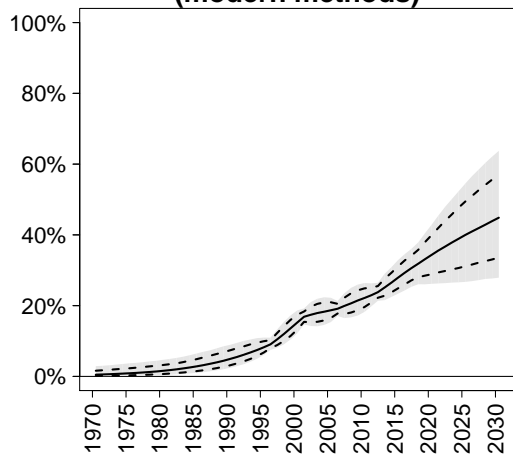

Bhutan --- All women

**CP (any)**

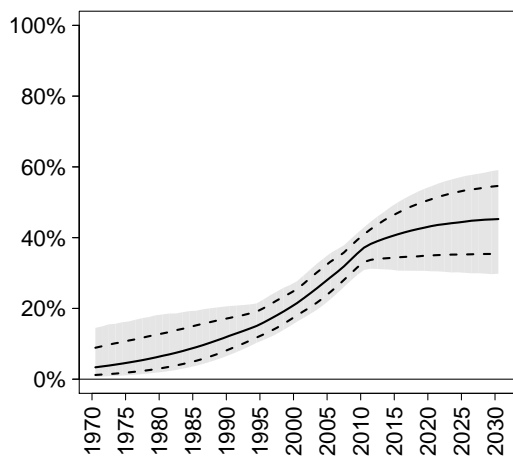

**CP (modern)**

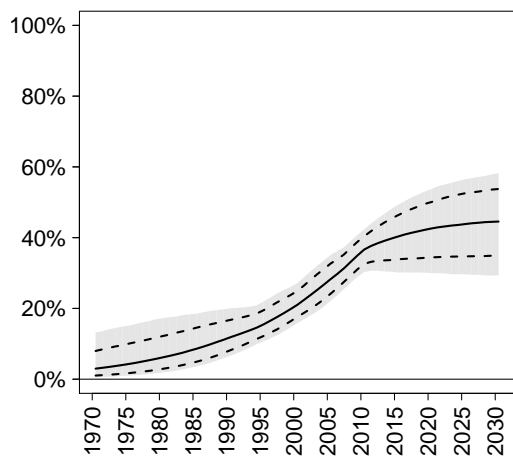

**CP (traditional)**

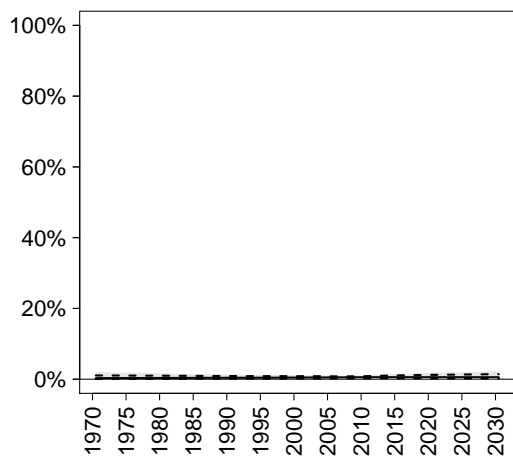

**Unmet need among all unmarried women**

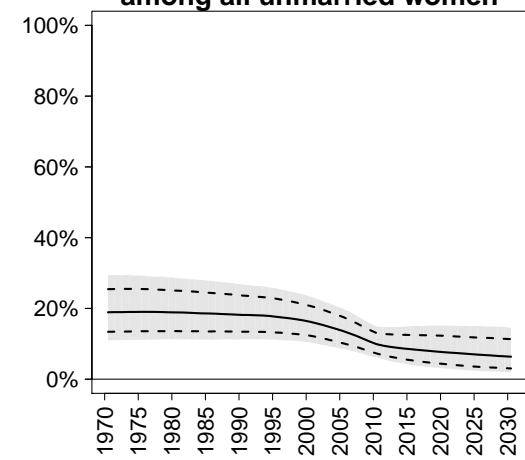

**Total demand**

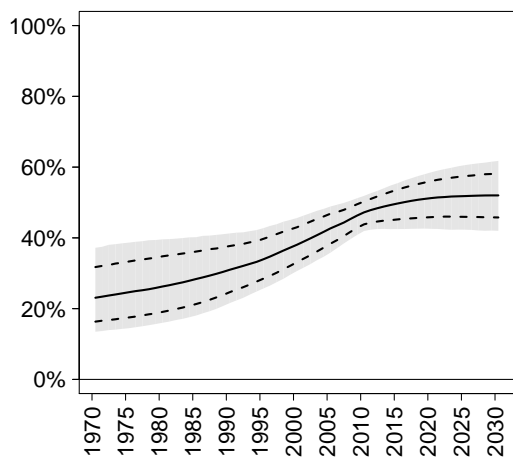

**Demand satisfied (any method)**

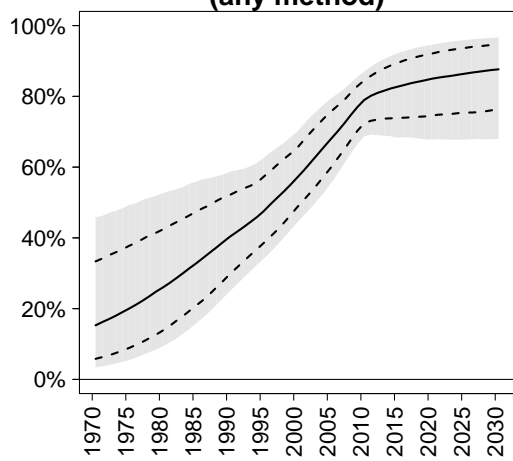

**Demand satisfied (modern methods)**

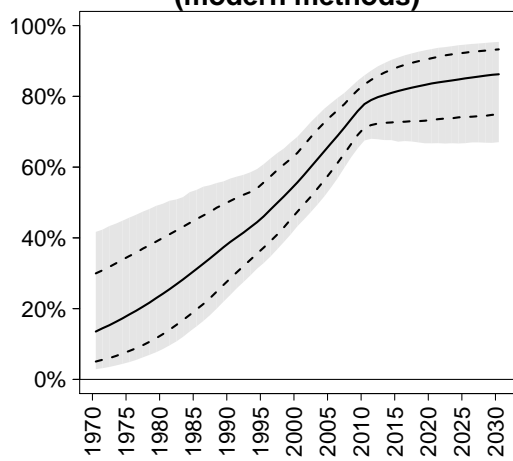

Bolivia (Plurinational State of) --- All women

**CP (any)**

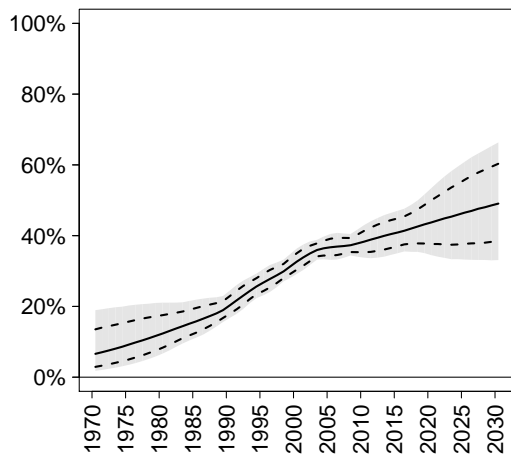

**CP (modern)**

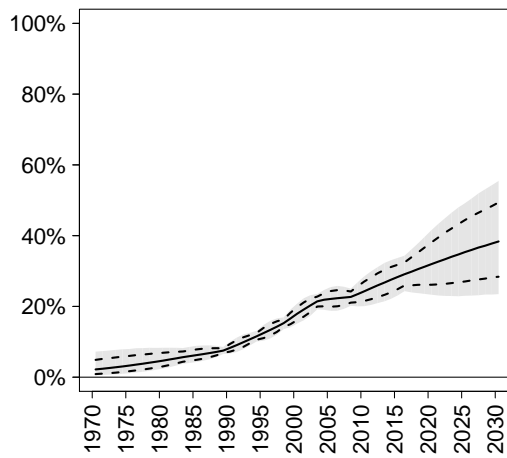

**CP (traditional)**

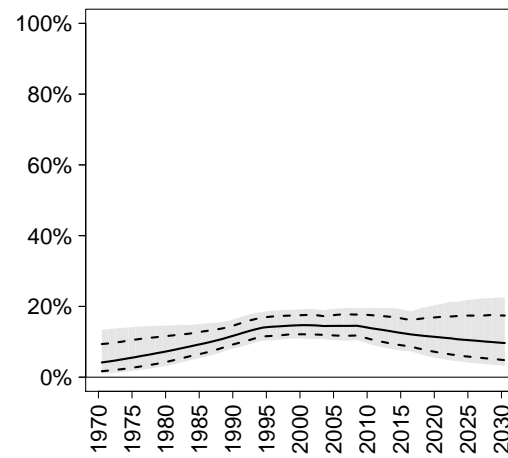

**Unmet need among all unmarried women**

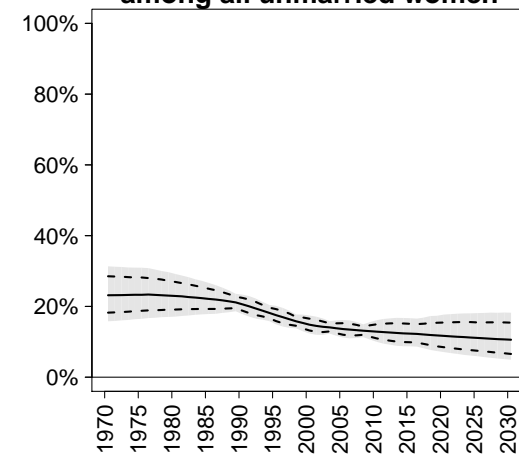

**Total demand**

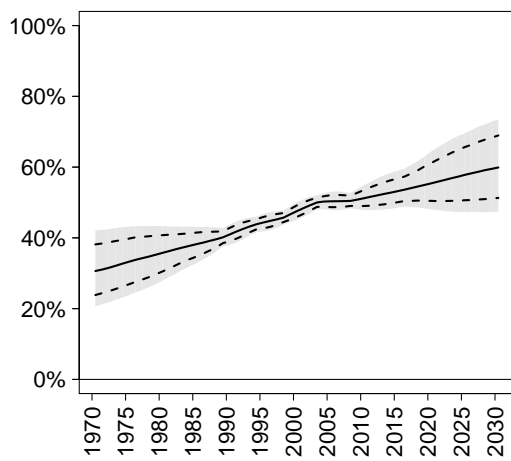

**Demand satisfied (any method)**

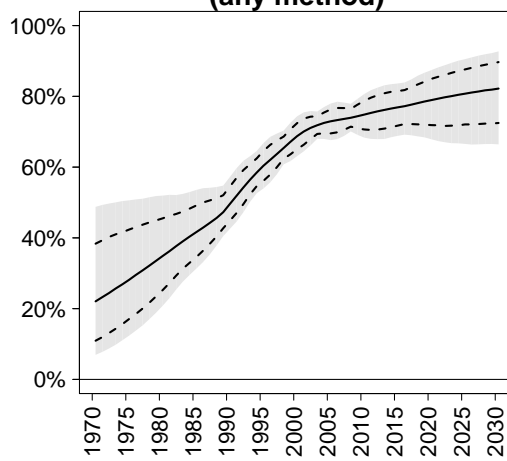

**Demand satisfied (modern methods)**

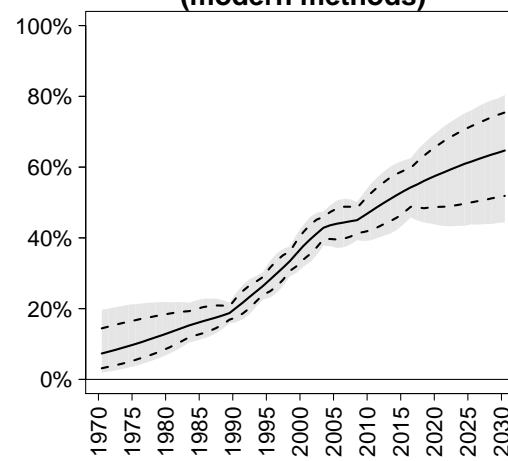

Bosnia and Herzegovina --- All women

**CP (any)**

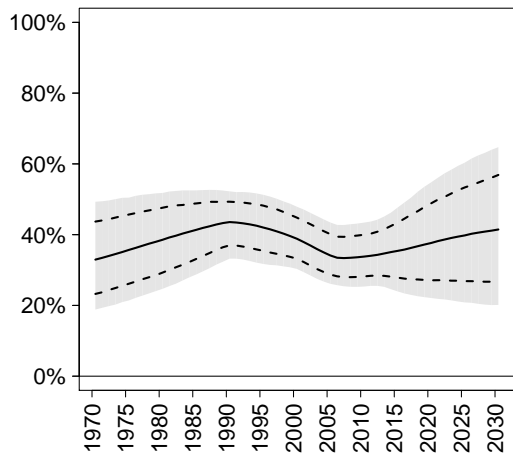

**CP (modern)**

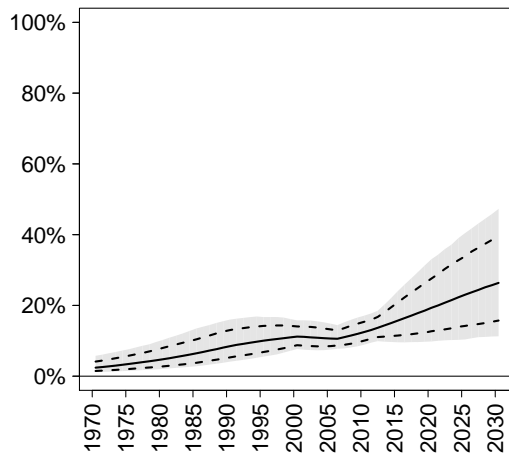

**CP (traditional)**

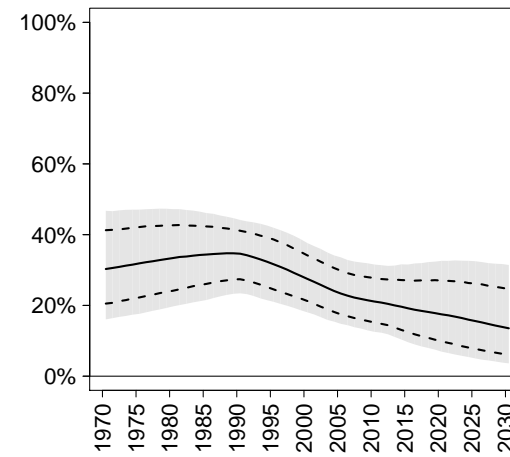

**Unmet need among all unmarried women**

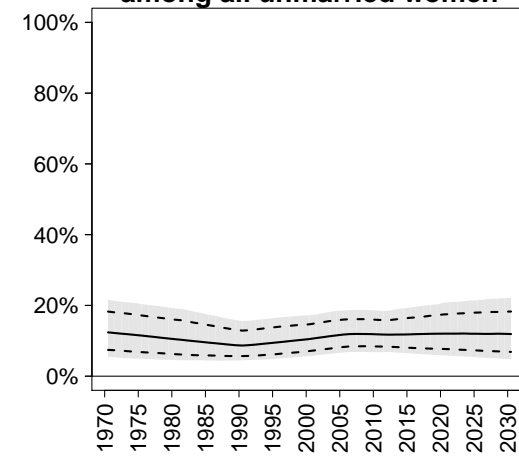

**Total demand**

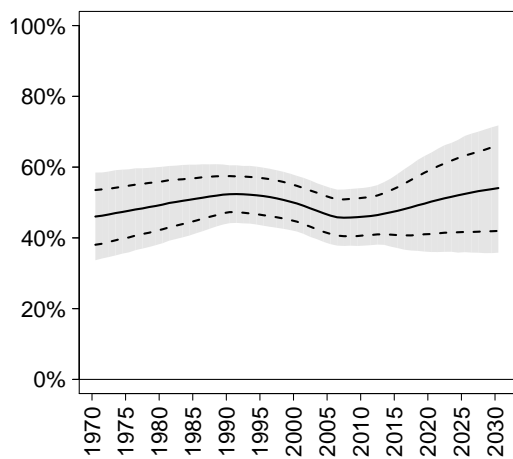

**Demand satisfied (any method)**

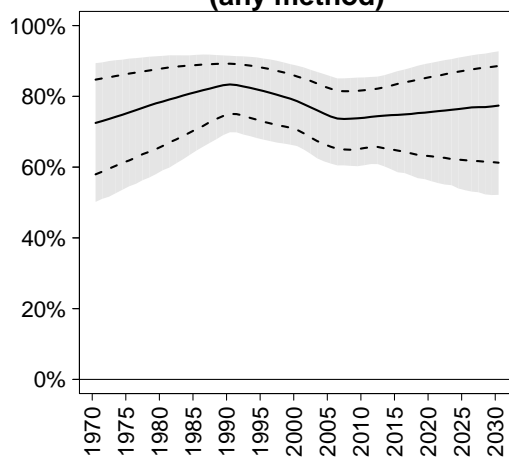

**Demand satisfied (modern methods)**

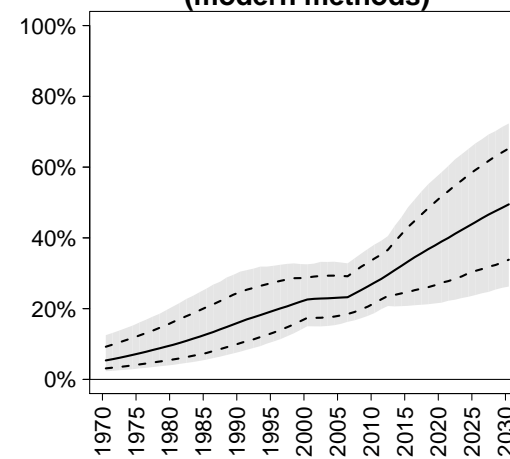

Botswana --- All women

**CP (any)**

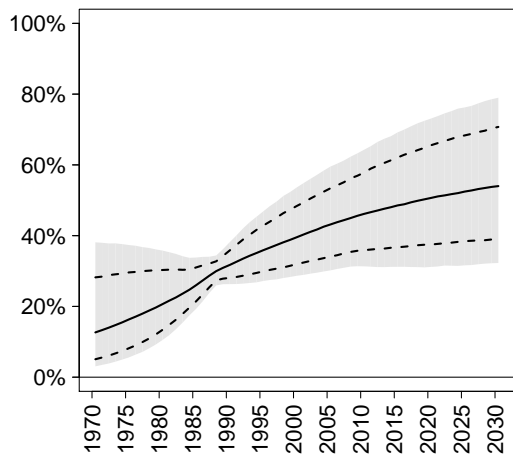

**CP (modern)**

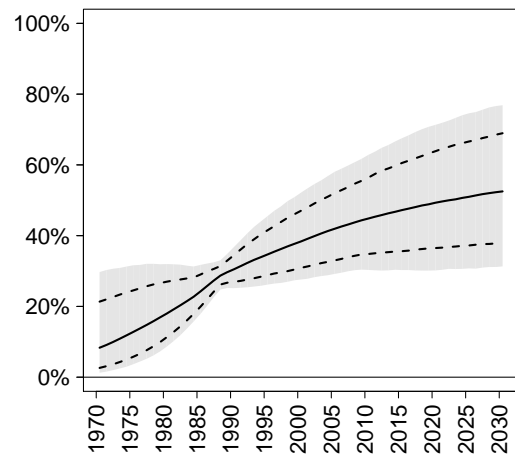

**CP (traditional)**

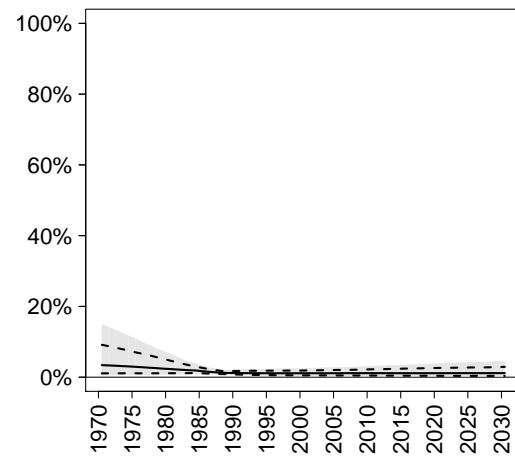

**Unmet need among all unmarried women**

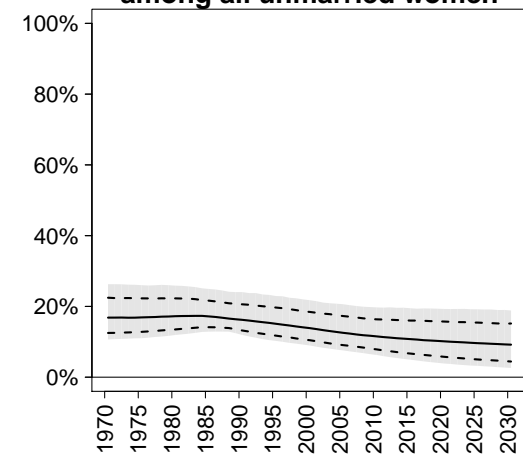

**Total demand**

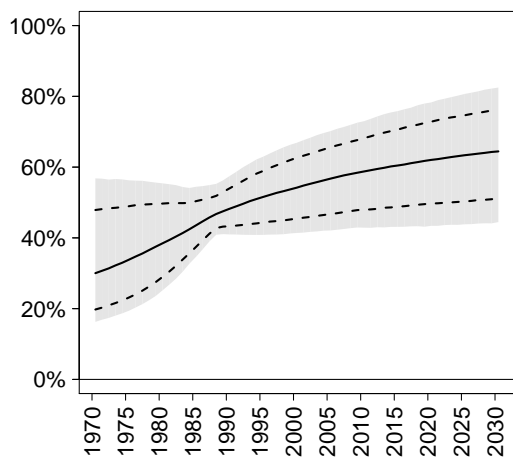



Brazil --- All women

**CP (any)**

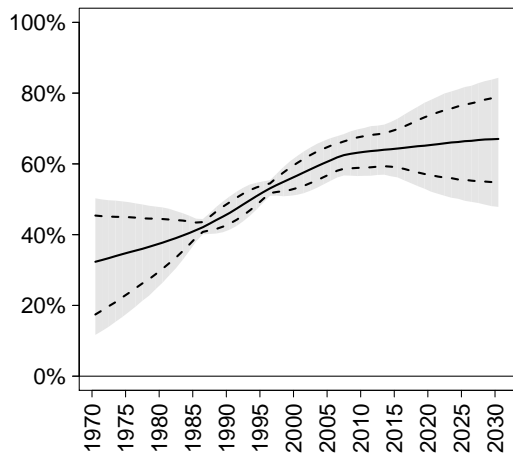

**CP (modern)**

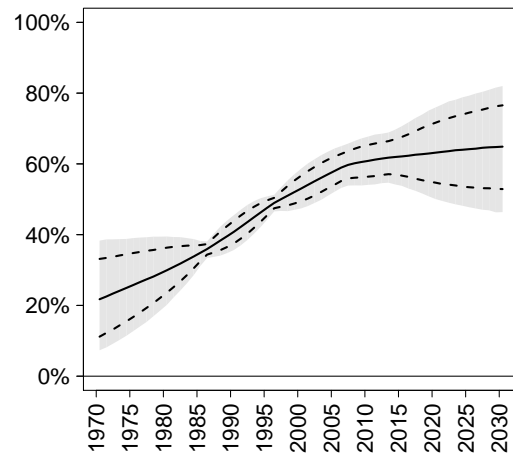

**CP (traditional)**

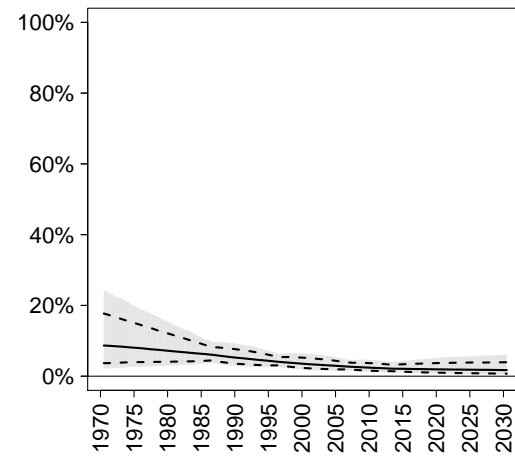

**Unmet need among all unmarried women**

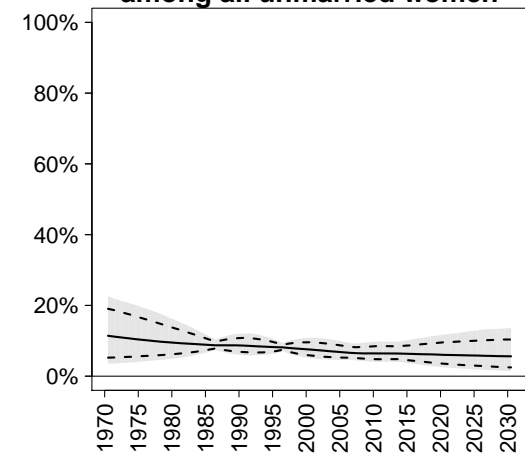

**Total demand**

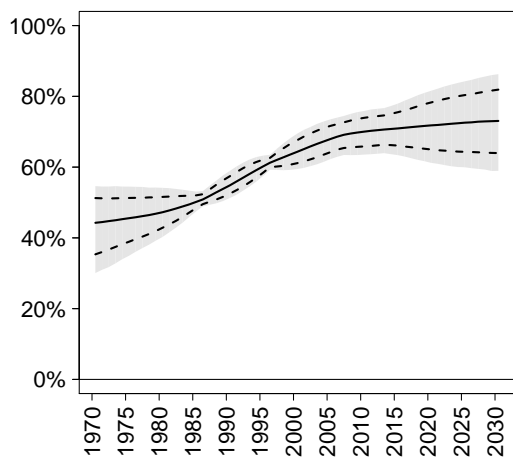

Bulgaria --- All women

**CP (any)**

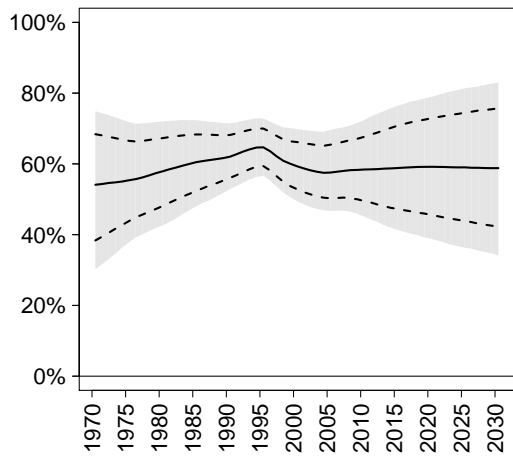

**CP (modern)**

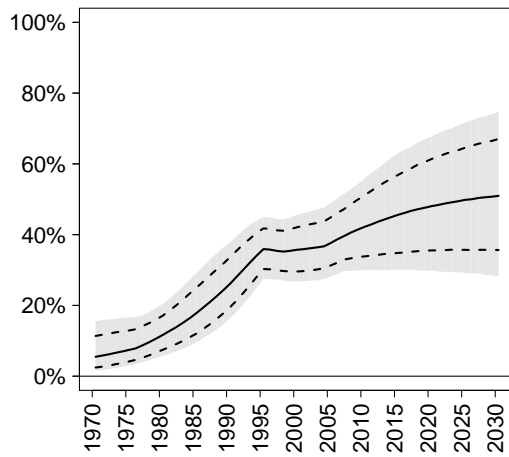

**CP (traditional)**

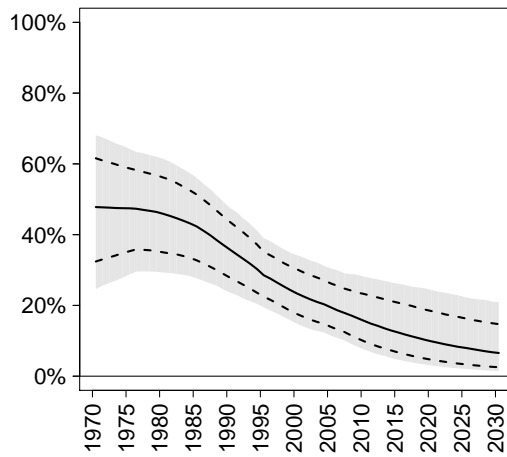

**Unmet need among all unmarried women**

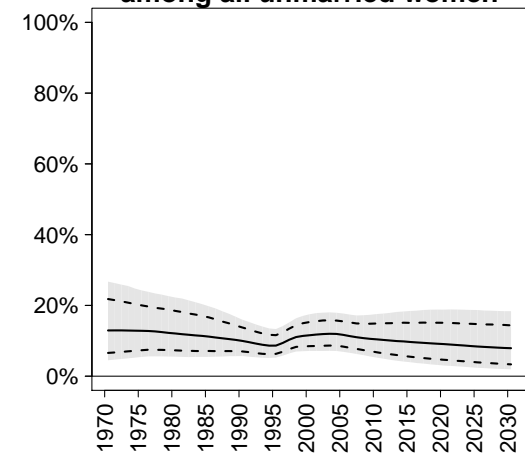

**Total demand**

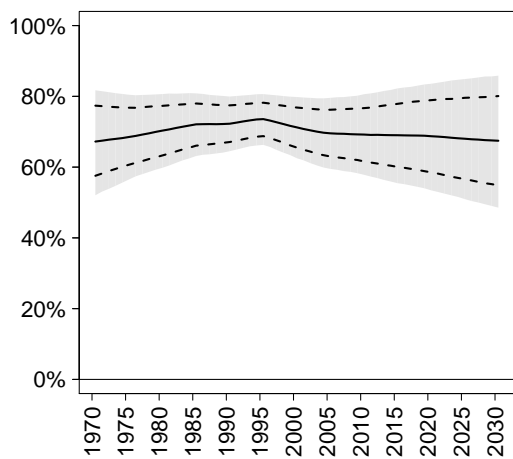

**Demand satisfied (any method)**

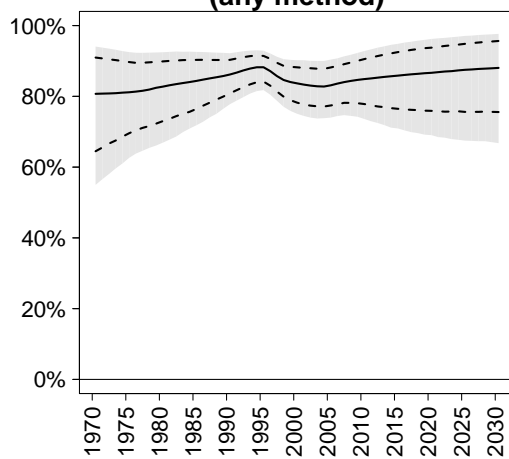

**Demand satisfied (modern methods)**

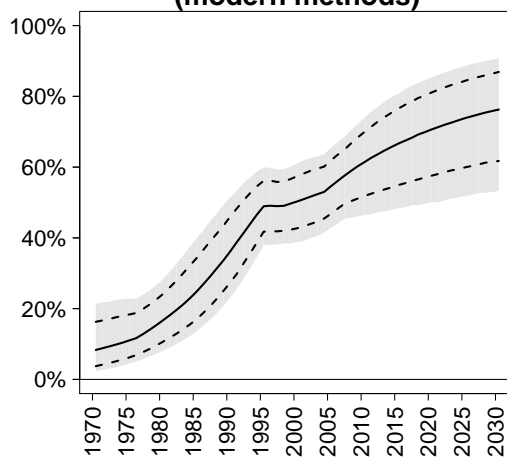

Burkina Faso --- All women

**CP (any)**

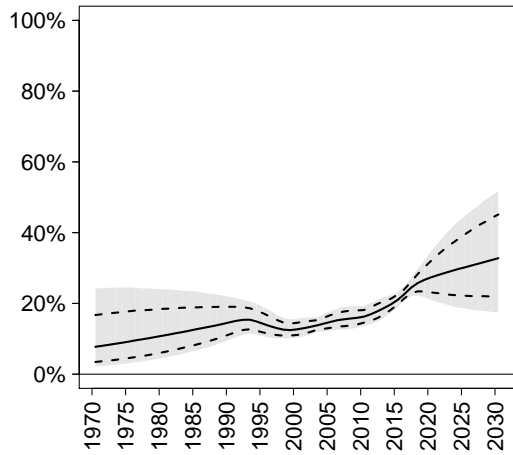

**CP (modern)**

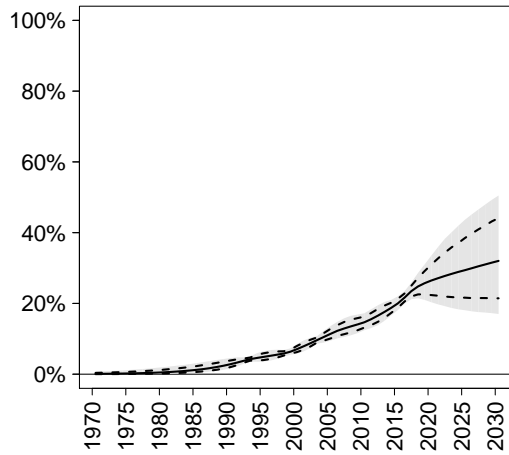

**CP (traditional)**

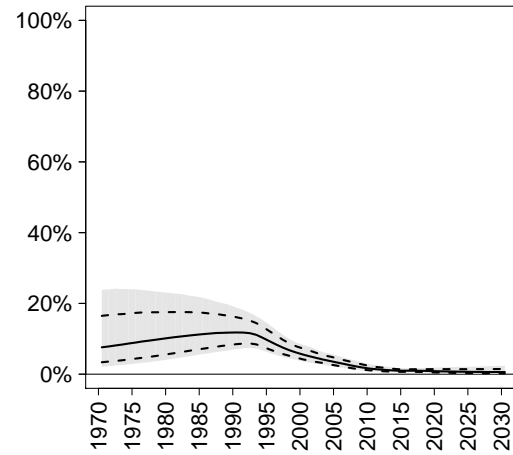

**Unmet need among all unmarried women**

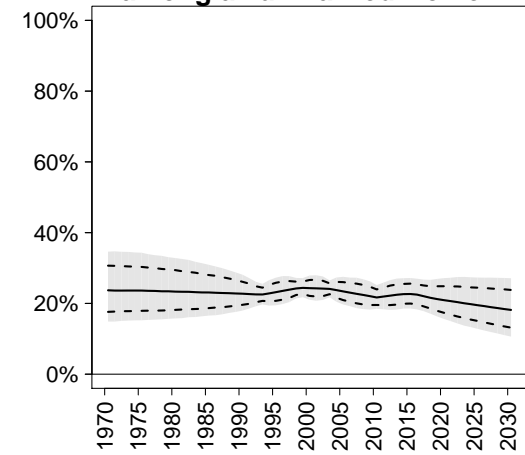

**Total demand**

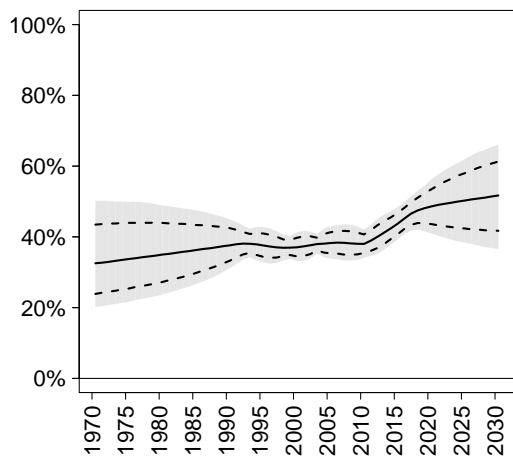

**Demand satisfied (any method)**

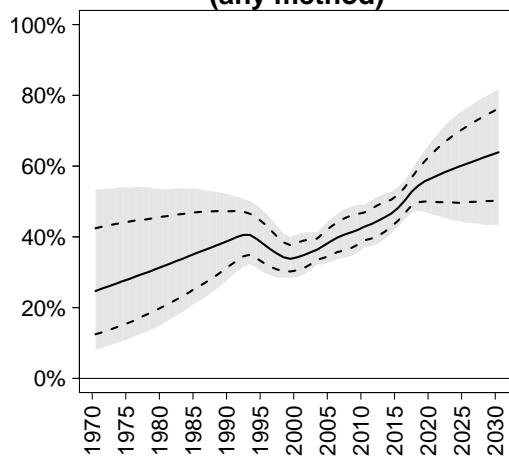

**Demand satisfied (modern methods)**

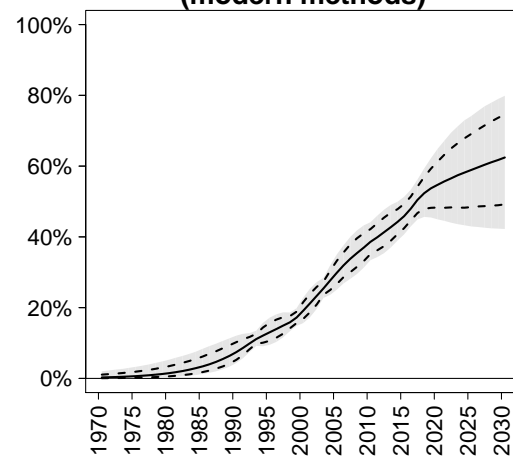

Burundi --- All women

**CP (any)**

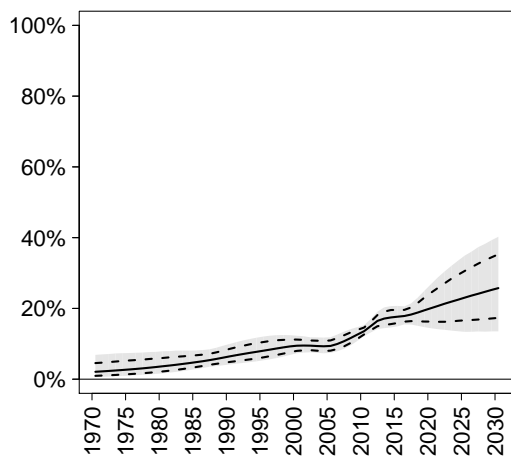

**CP (modern)**

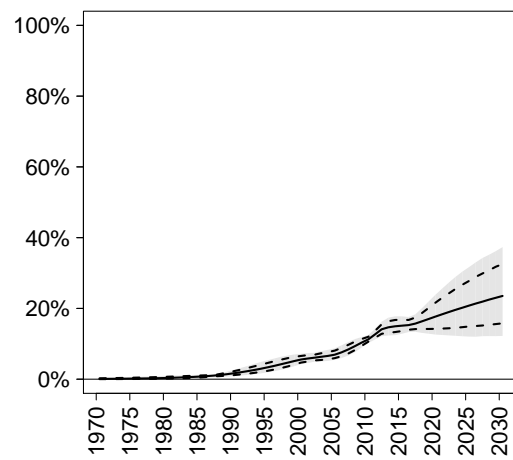

**CP (traditional)**

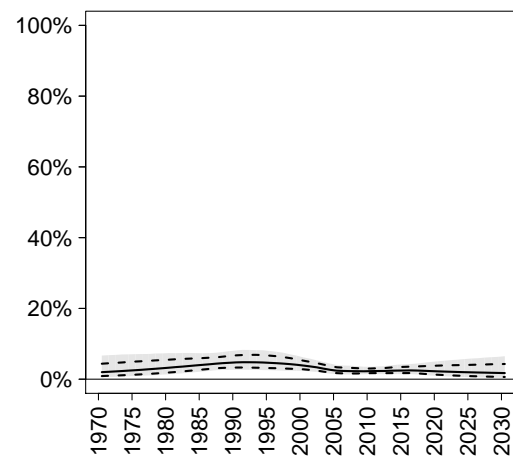

**Unmet need among all unmarried women**

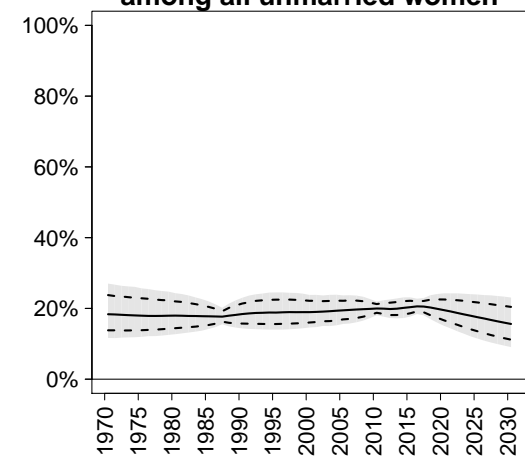

**Total demand**

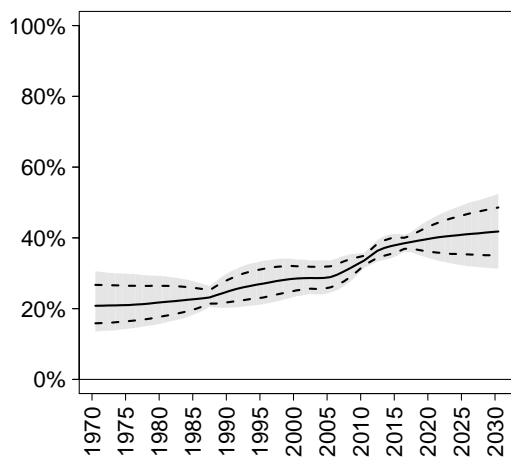

**Demand satisfied (any method)**

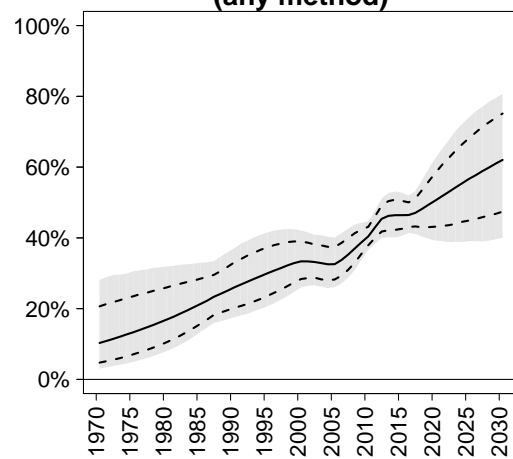

**Demand satisfied (modern methods)**

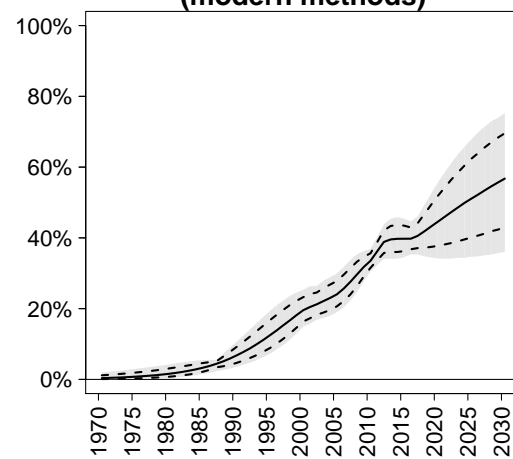

Cabo Verde --- All women

**CP (any)**

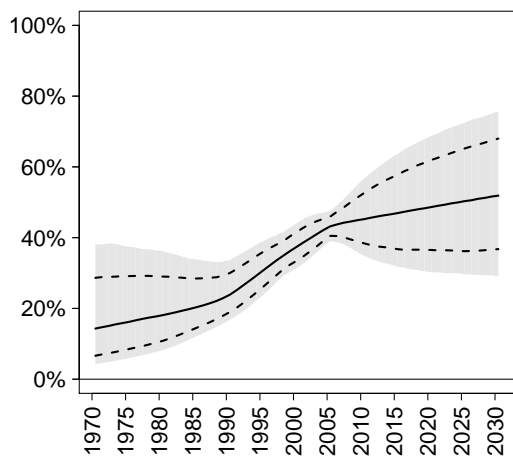

**CP (modern)**

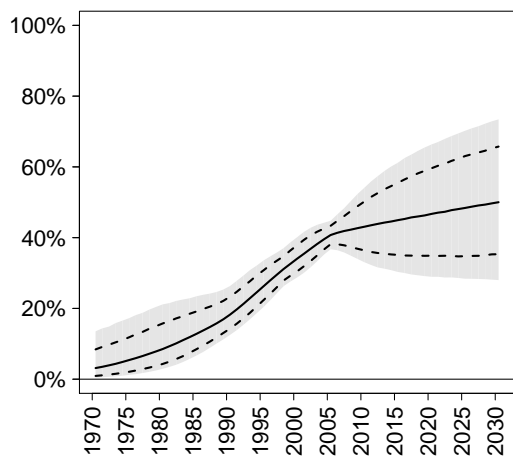

**CP (traditional)**

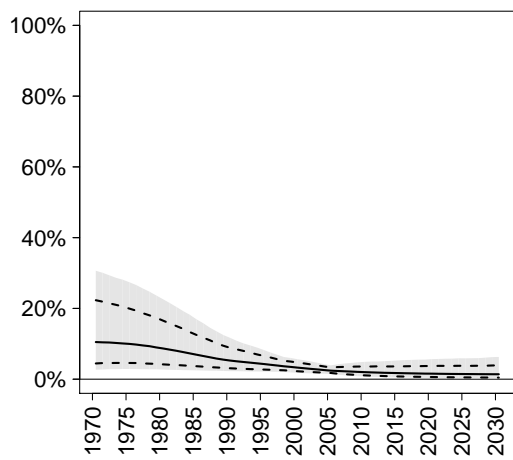

**Unmet need among all unmarried women**

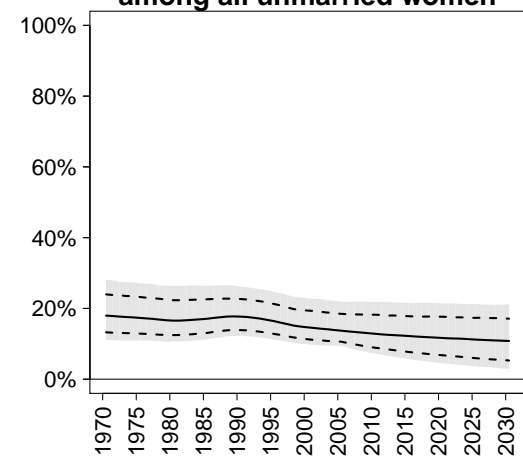

**Total demand**

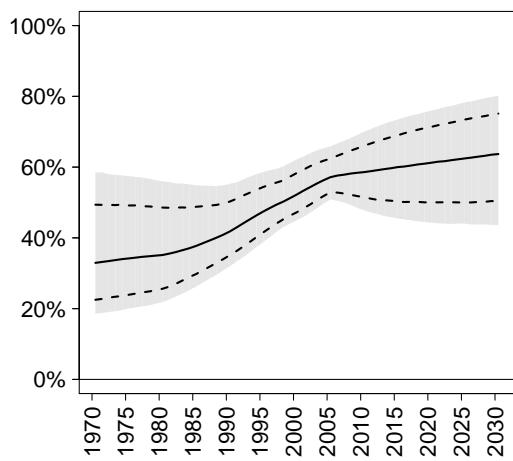

**Demand satisfied (any method)**

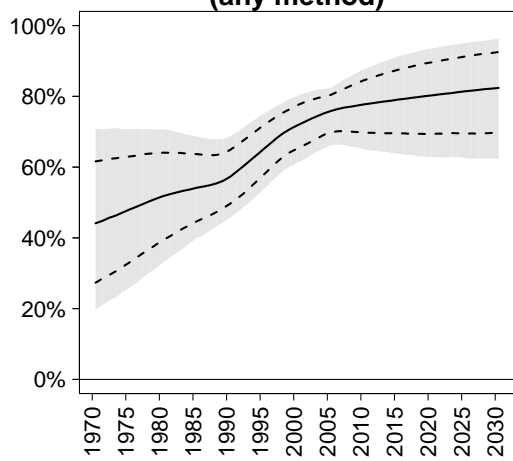

**Demand satisfied (modern methods)**

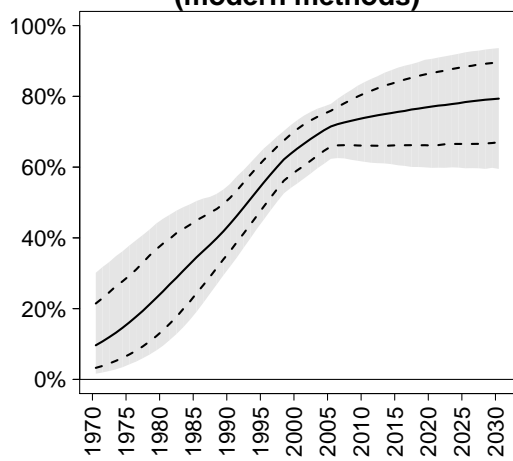

Cambodia --- All women

**CP (any)**

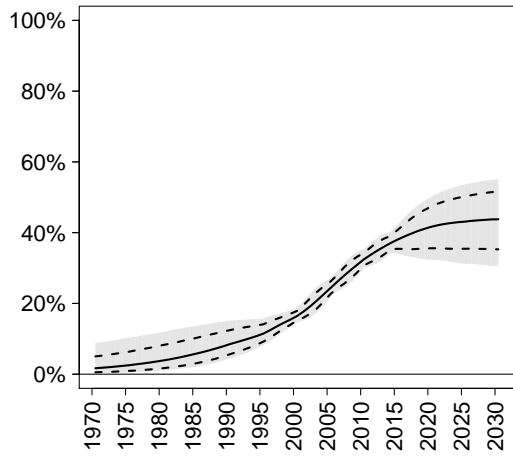

**CP (modern)**

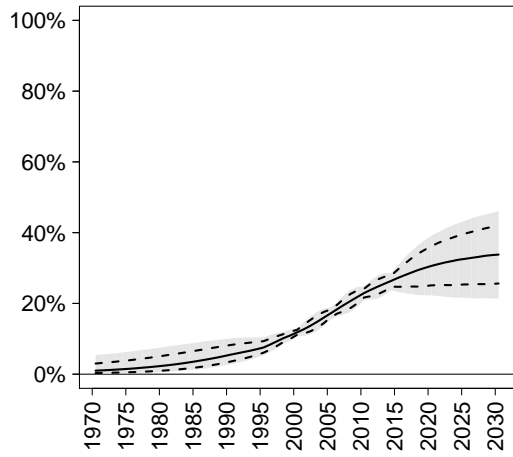

**CP (traditional)**

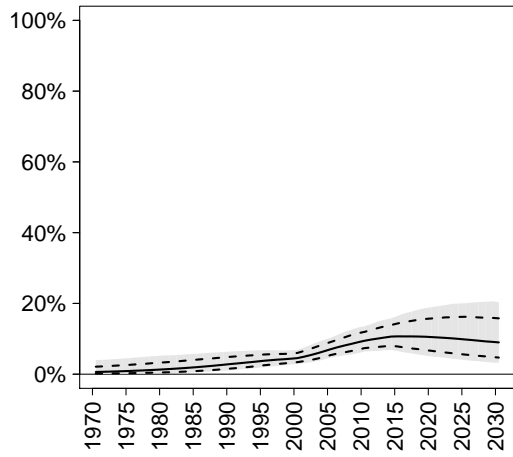

**Unmet need among all unmarried women**

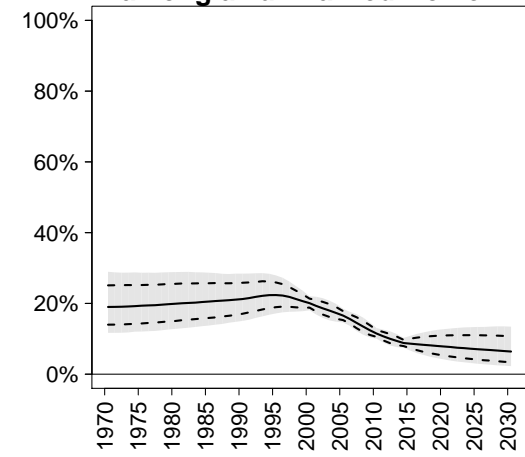

**Total demand**

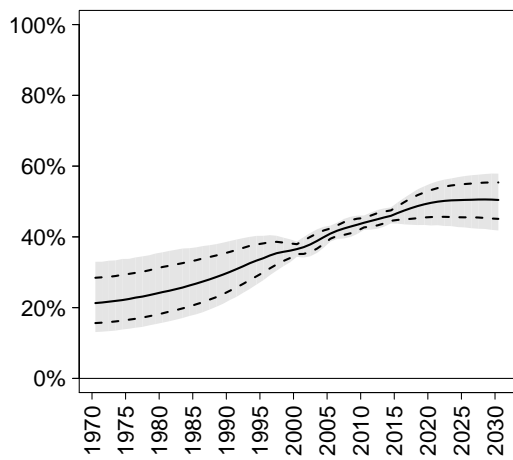

**Demand satisfied (any method)**

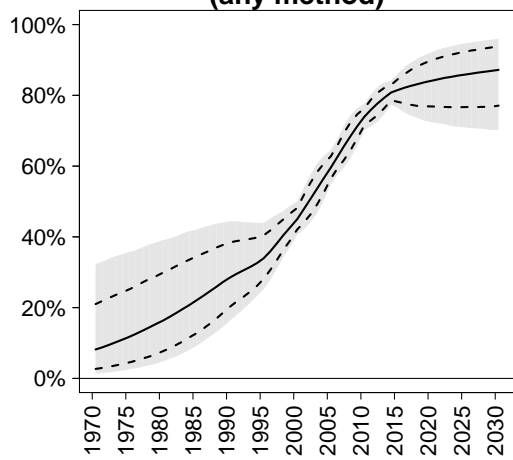

**Demand satisfied (modern methods)**

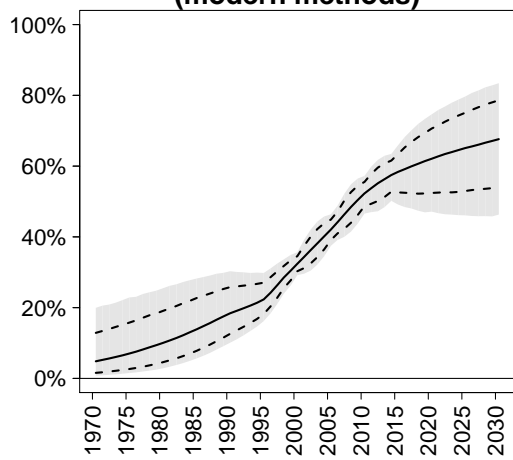

Cameroon --- All women

**CP (any)**

**CP (modern)**

**CP (traditional)**

**Unmet need  
among all unmarried women**

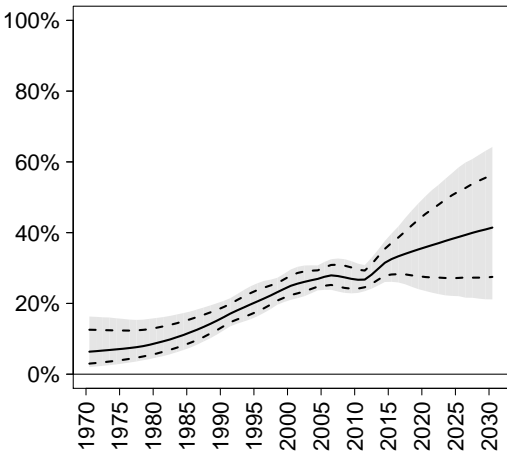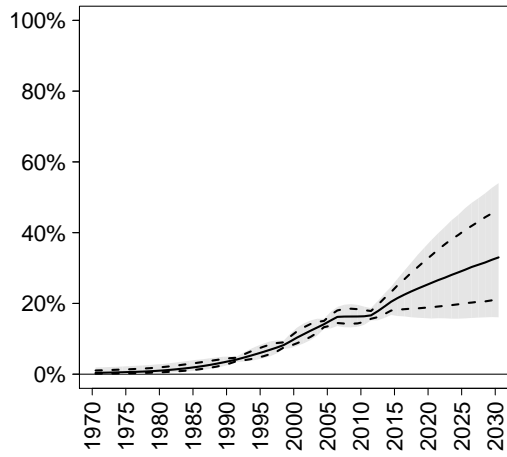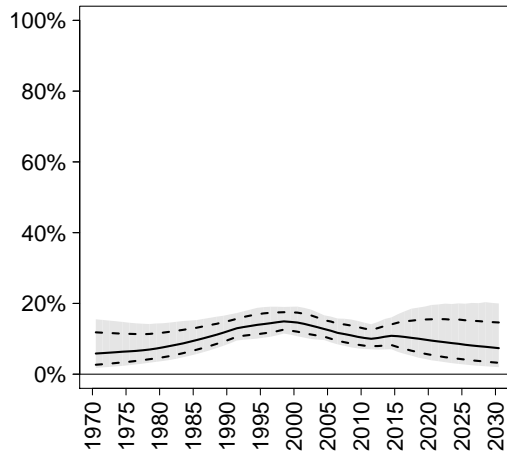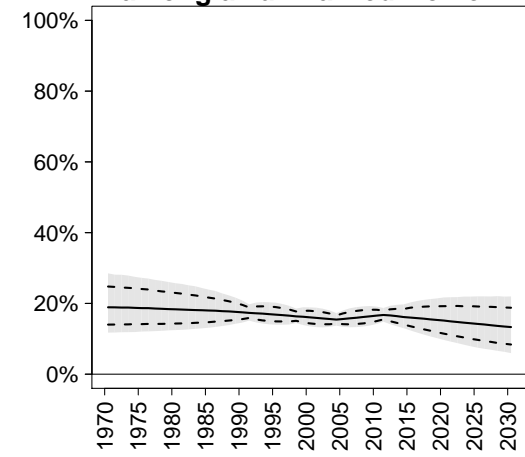

**Total demand**

**Demand satisfied  
(any method)**

**Demand satisfied  
(modern methods)**

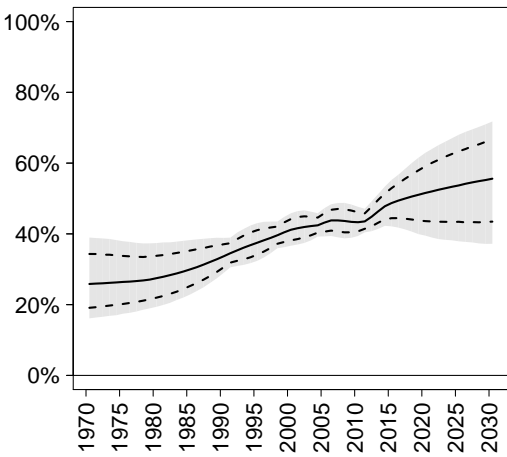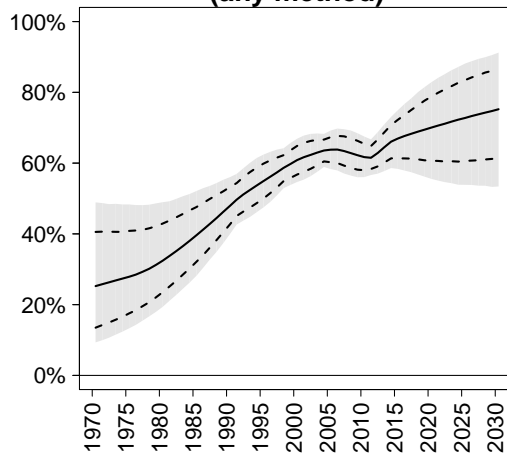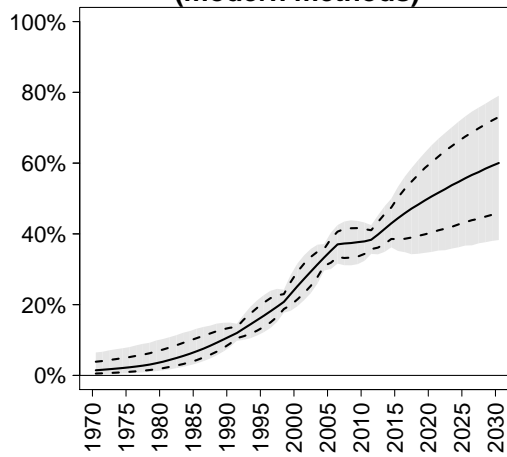

Canada --- All women

**CP (any)**

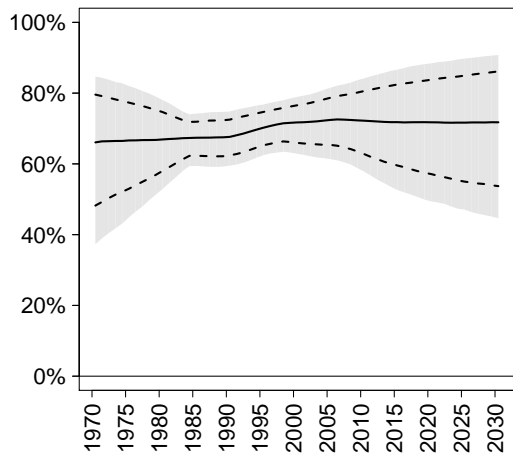

**CP (modern)**

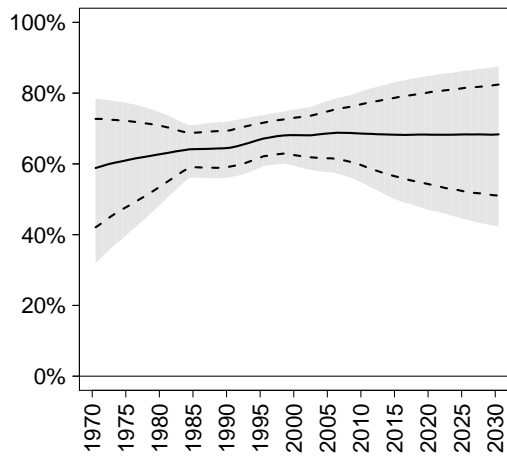

**CP (traditional)**

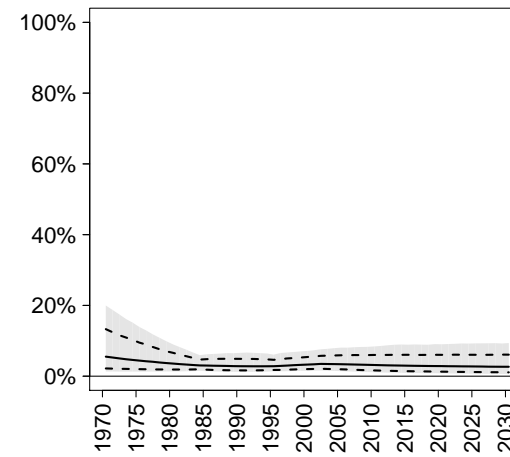

**Unmet need among all unmarried women**

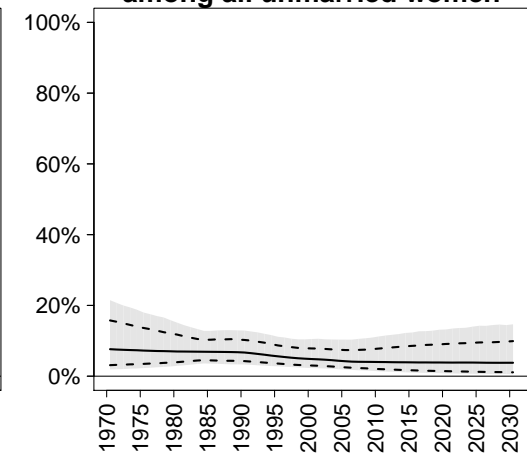

**Total demand**

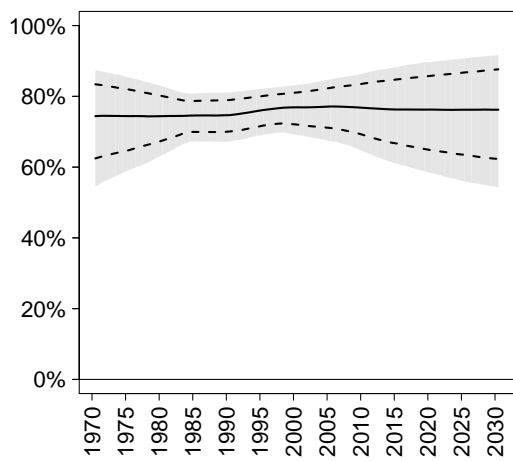



Central African Republic --- All women

**CP (any)**

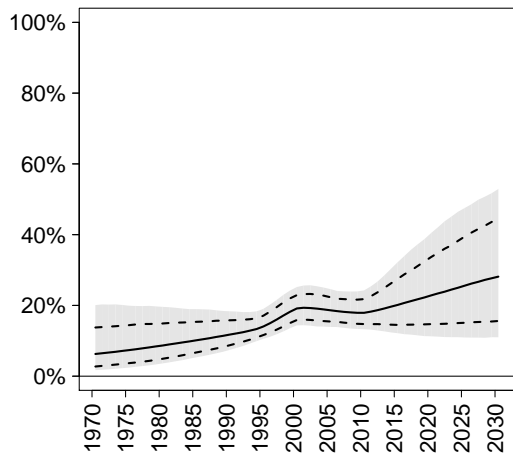

**CP (modern)**

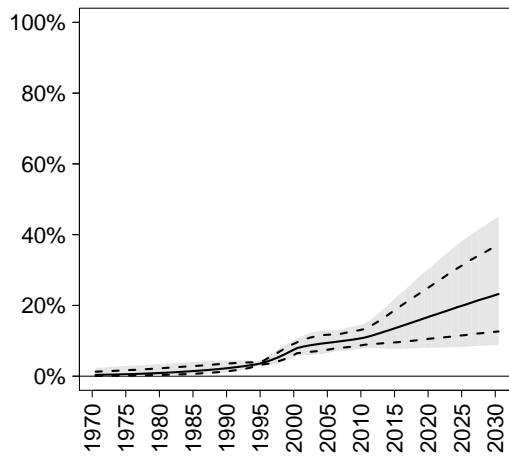

**CP (traditional)**

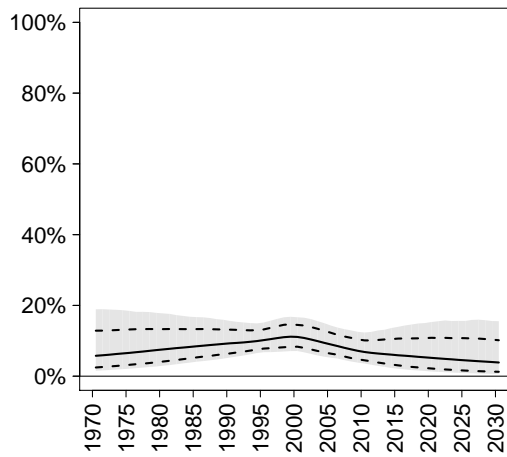

**Unmet need among all unmarried women**

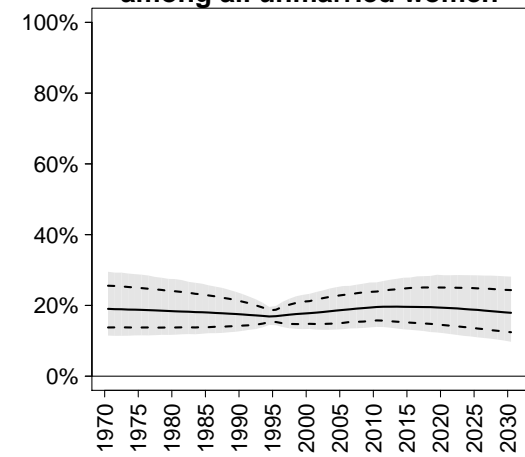

**Total demand**

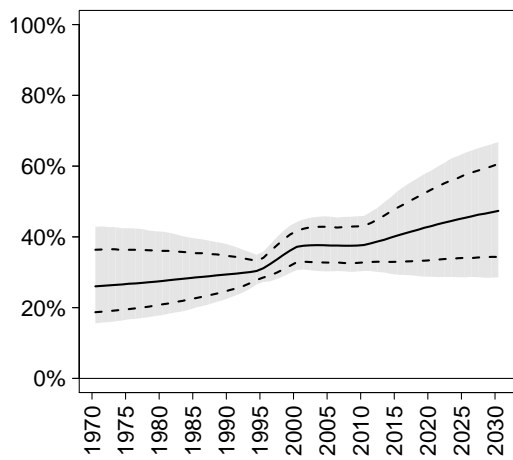

**Demand satisfied (any method)**

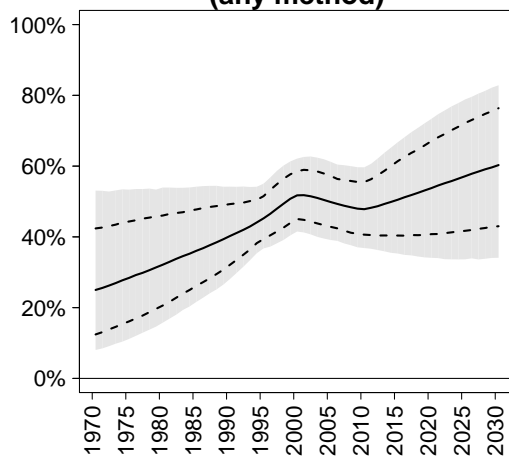

**Demand satisfied (modern methods)**

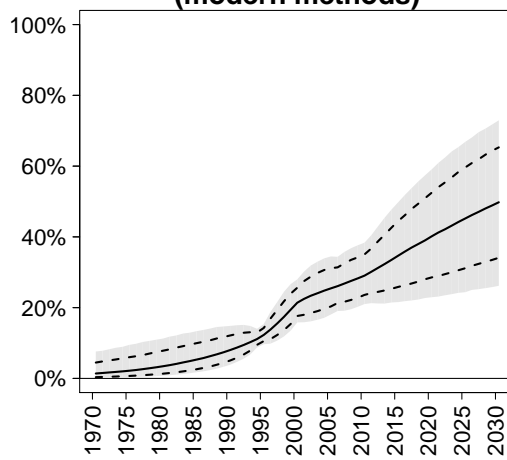

Chad --- All women

**CP (any)**

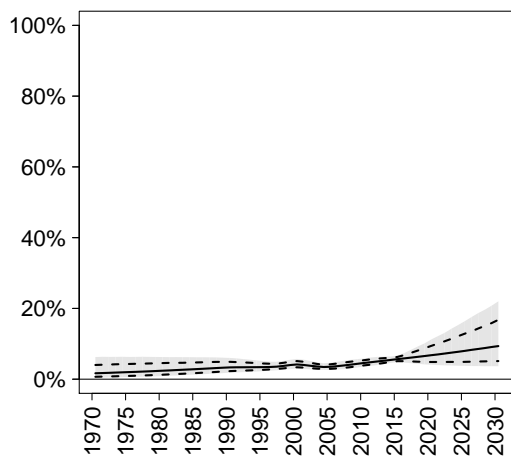

**CP (modern)**

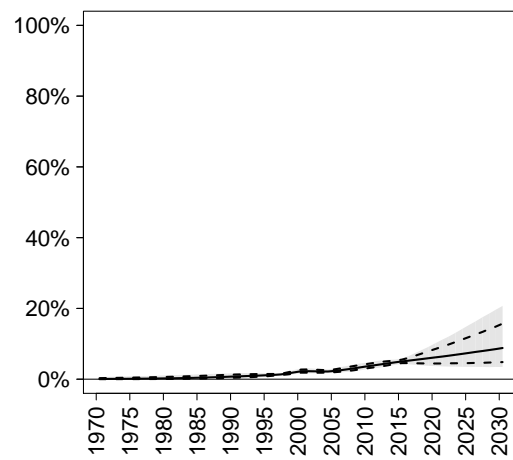

**CP (traditional)**

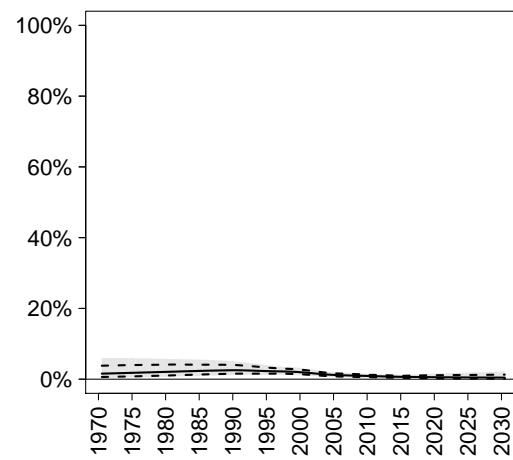

**Unmet need among all unmarried women**

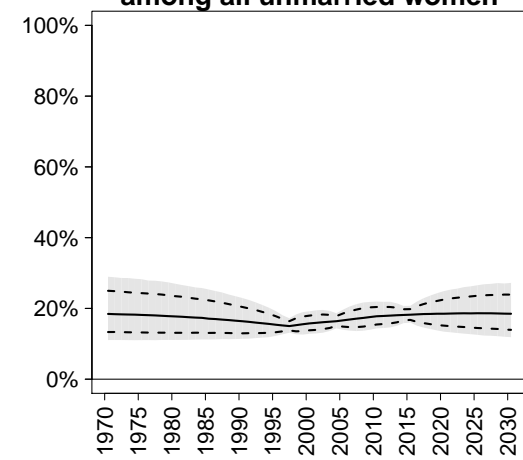

**Total demand**

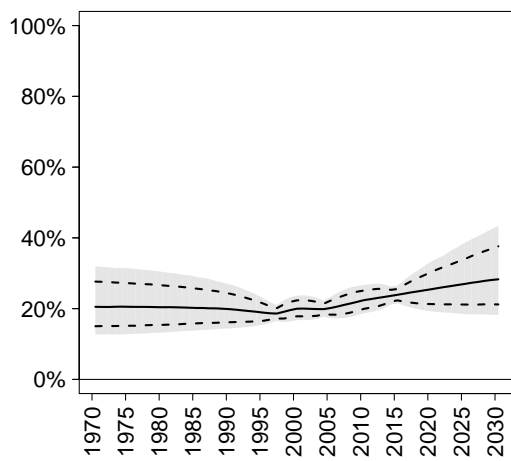

**Demand satisfied (any method)**

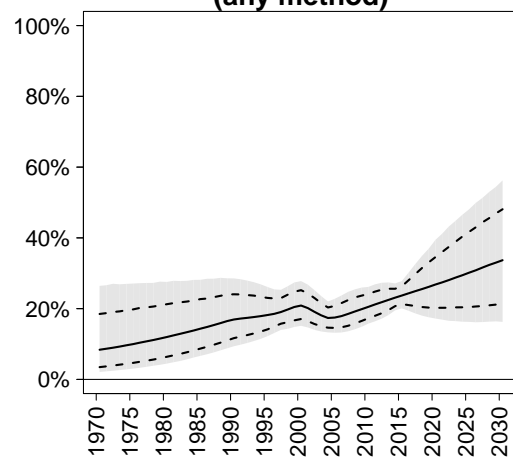

**Demand satisfied (modern methods)**

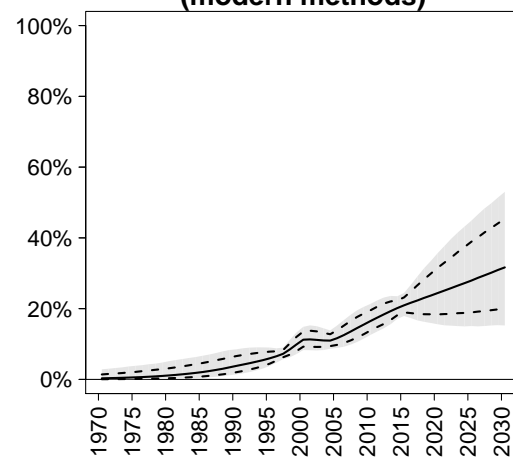

Chile --- All women

**CP (any)**

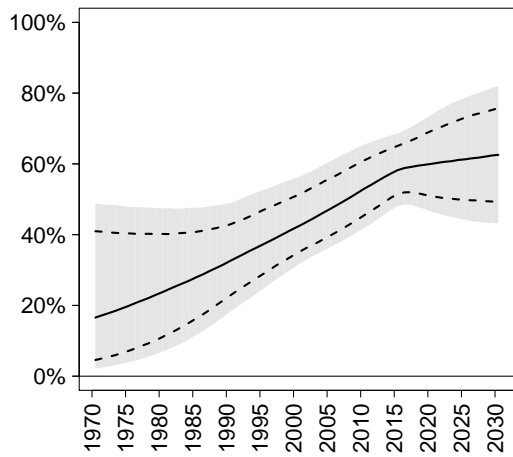

**CP (modern)**

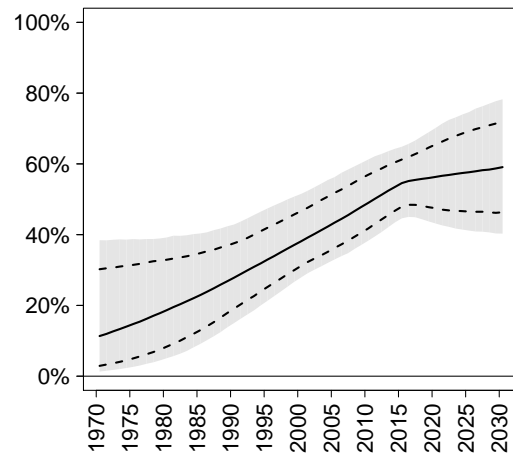

**CP (traditional)**

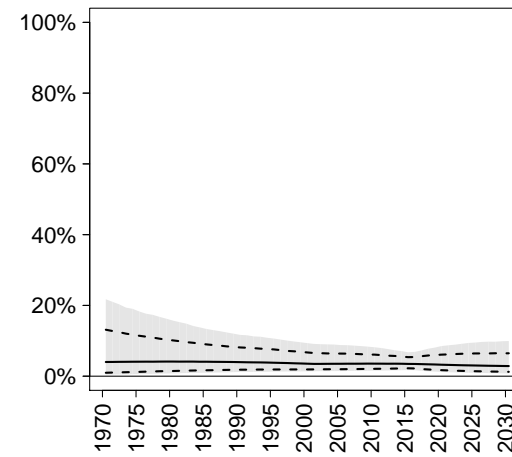

**Unmet need among all unmarried women**

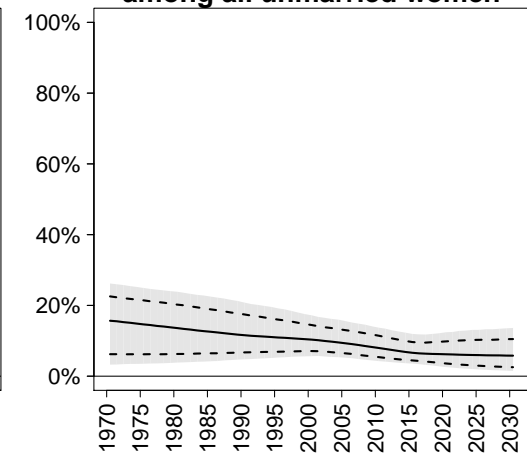

**Total demand**

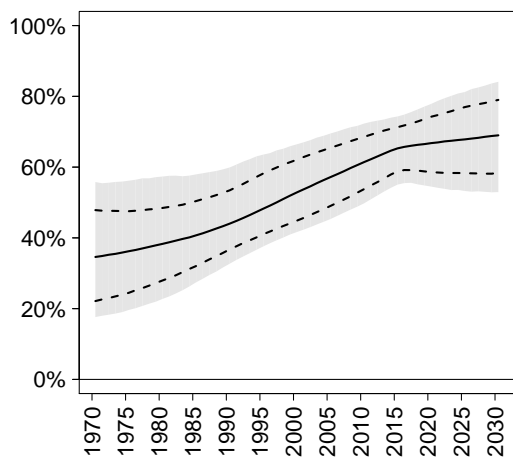

China --- All women

**CP (any)**

**CP (modern)**

**CP (traditional)**

**Unmet need among all unmarried women**

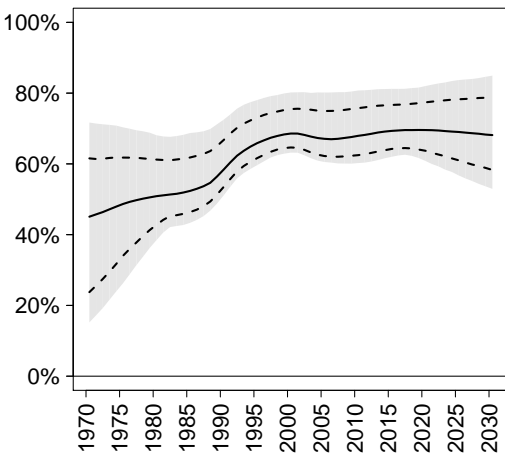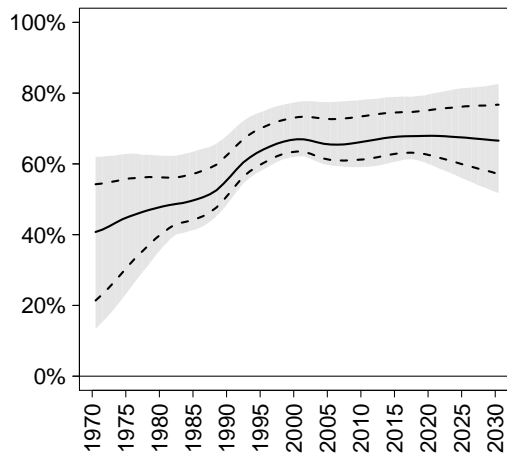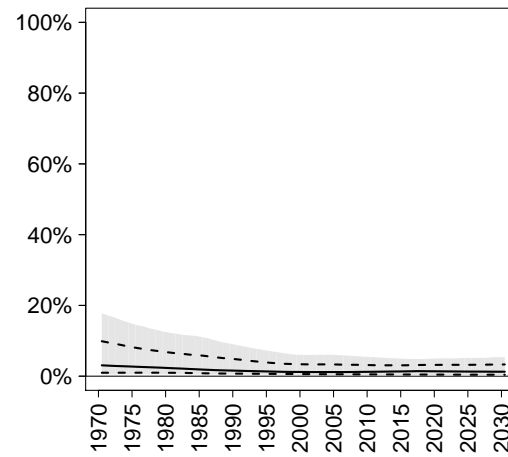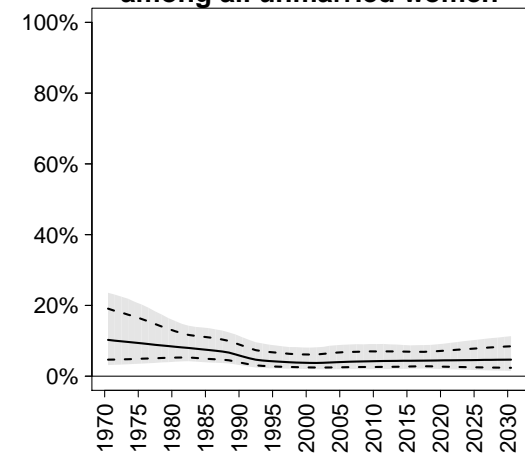

**Total demand**

**Demand satisfied (any method)**

**Demand satisfied (modern methods)**

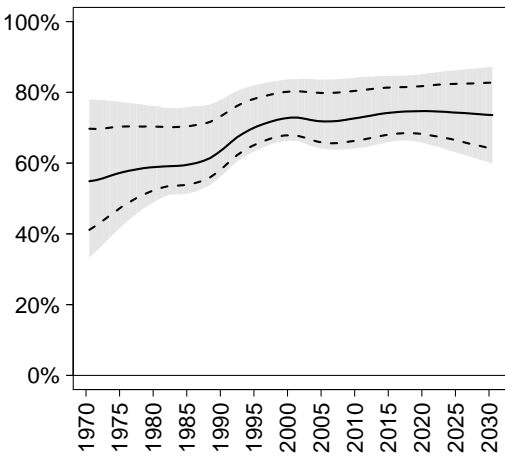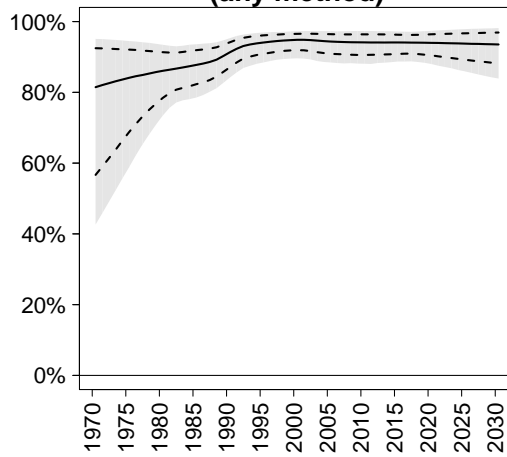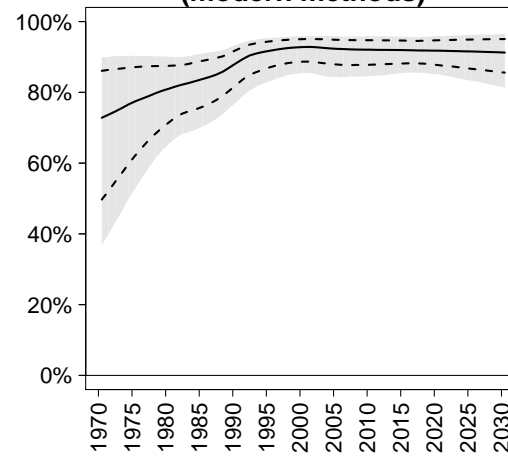

China, Hong Kong Special Administrative Region --- All women

**CP (any)**

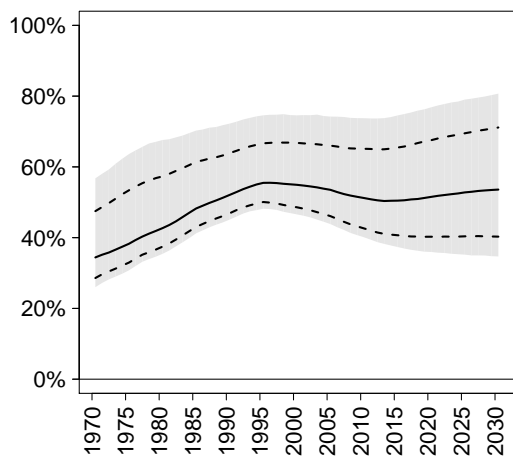

**CP (modern)**

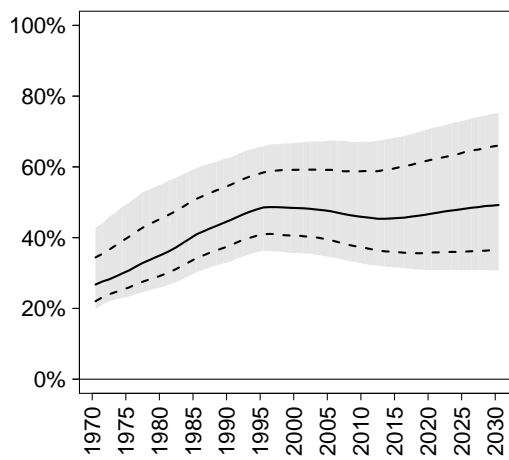

**CP (traditional)**

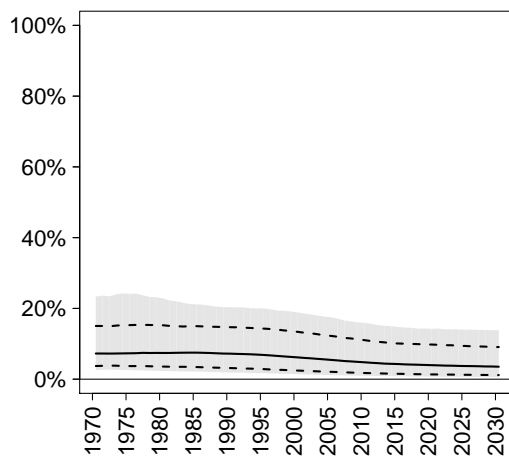

**Unmet need among all unmarried women**

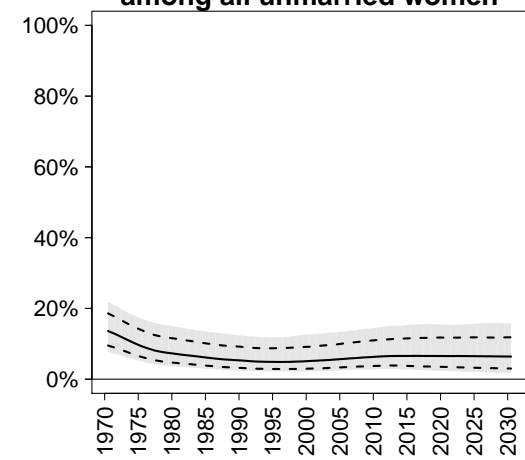

**Total demand**

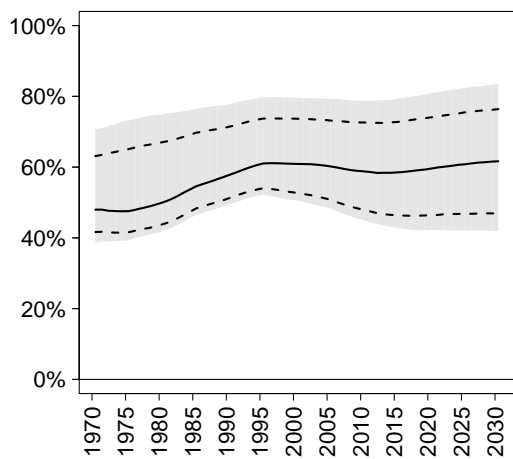

Colombia --- All women

**CP (any)**

**CP (modern)**

**CP (traditional)**

**Unmet need  
among all unmarried women**

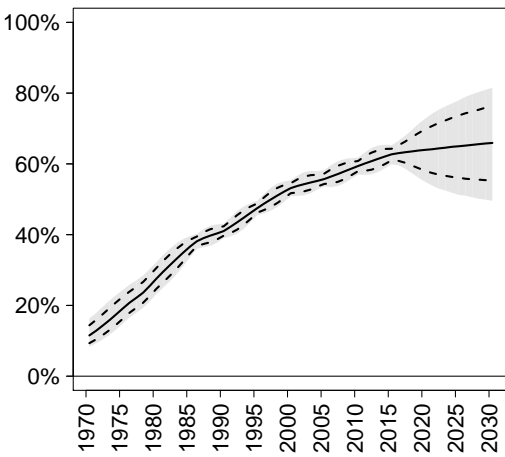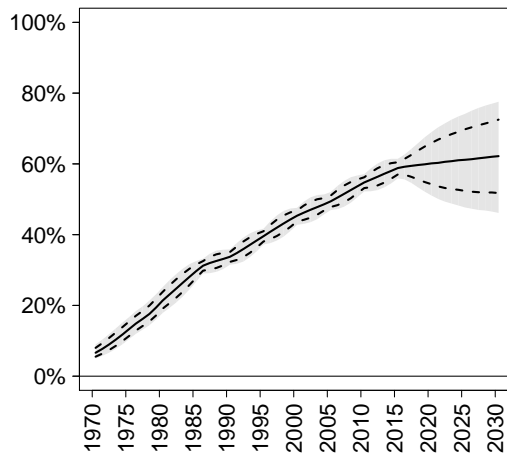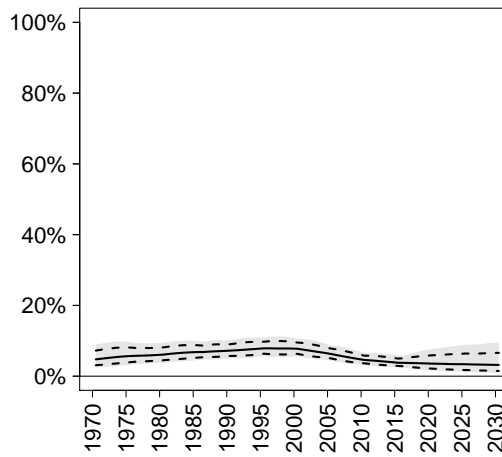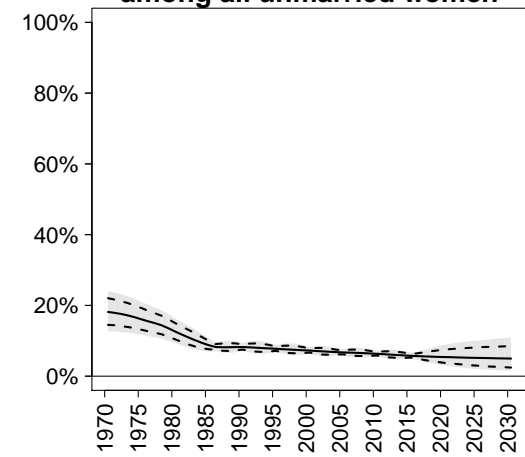

**Total demand**

**Demand satisfied  
(any method)**

**Demand satisfied  
(modern methods)**

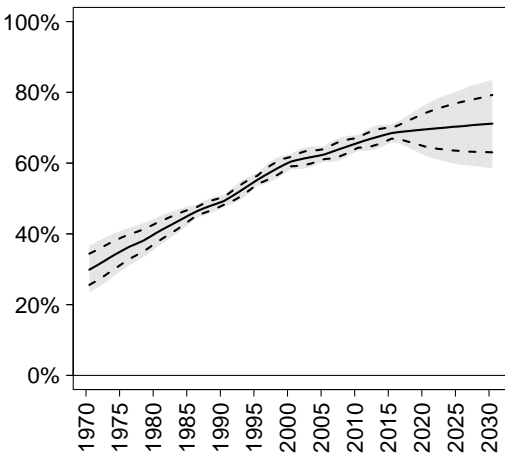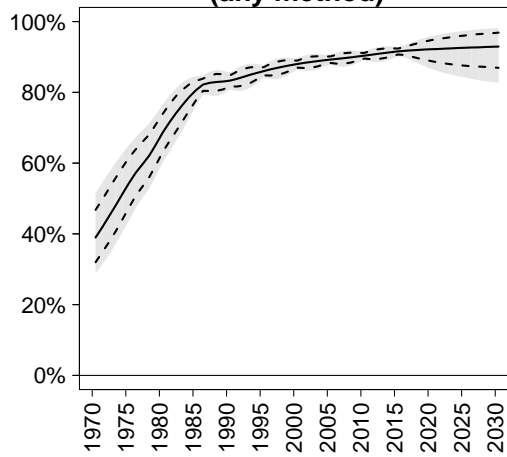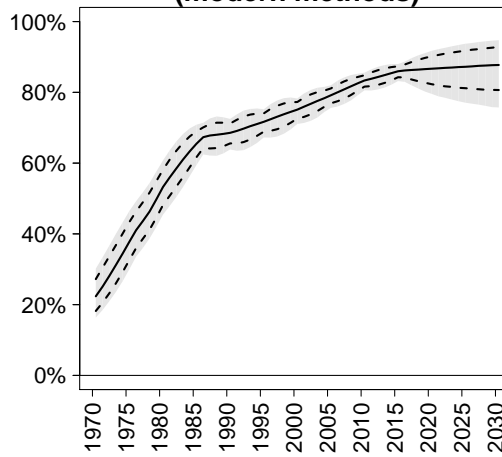

Comoros --- All women

CP (any)

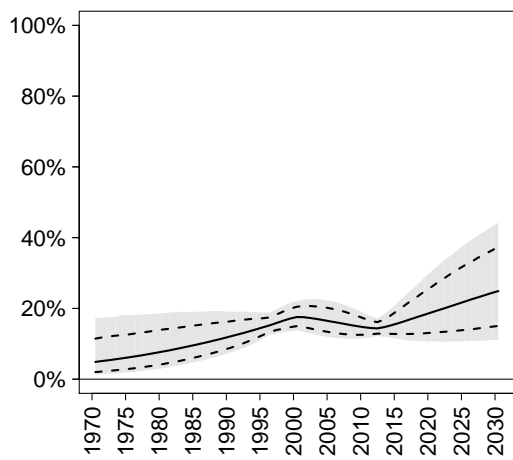

CP (modern)

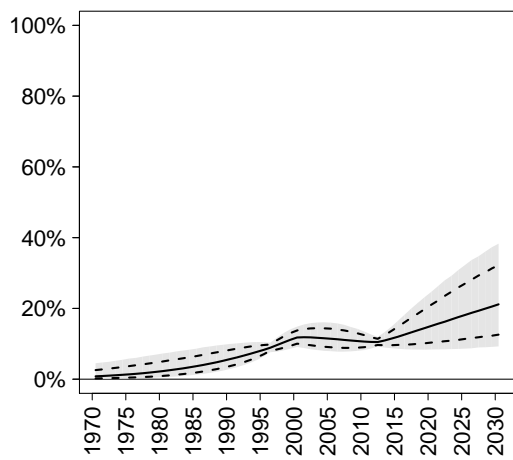

CP (traditional)

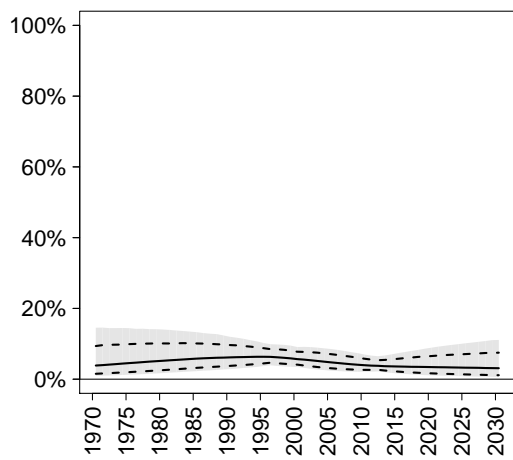

Unmet need among all unmarried women

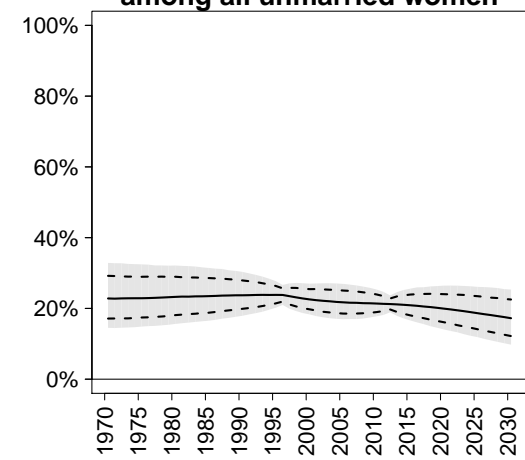

Total demand

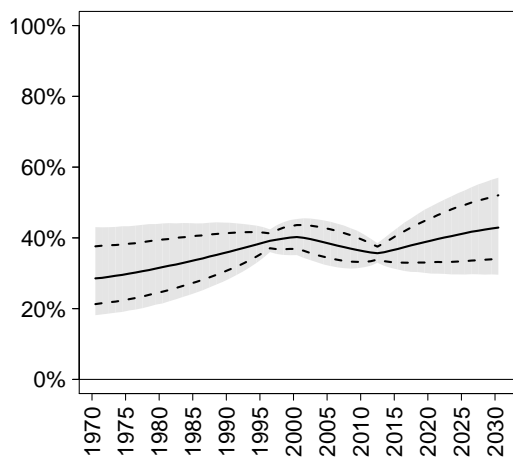

Congo --- All women

**CP (any)**

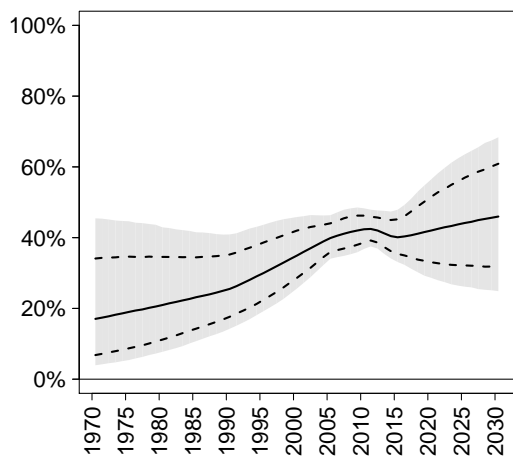

**CP (modern)**

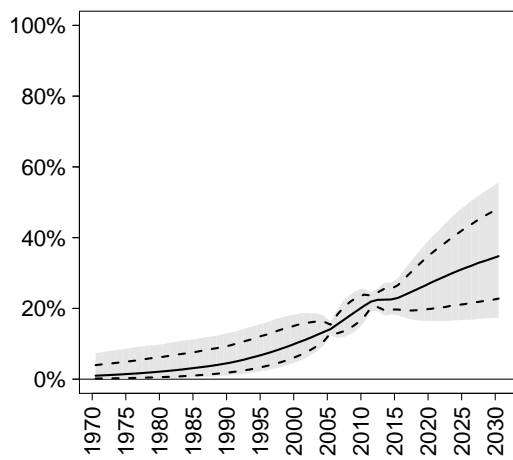

**CP (traditional)**

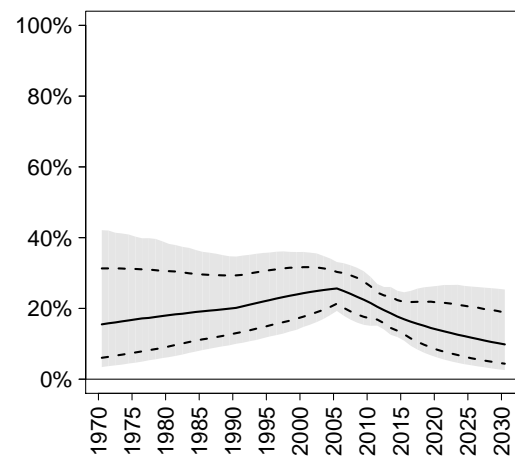

**Unmet need among all unmarried women**

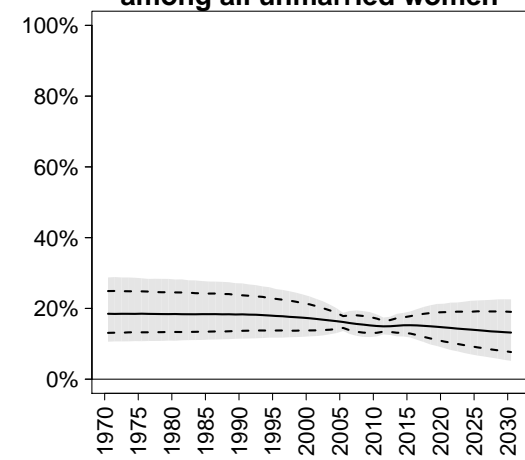

**Total demand**

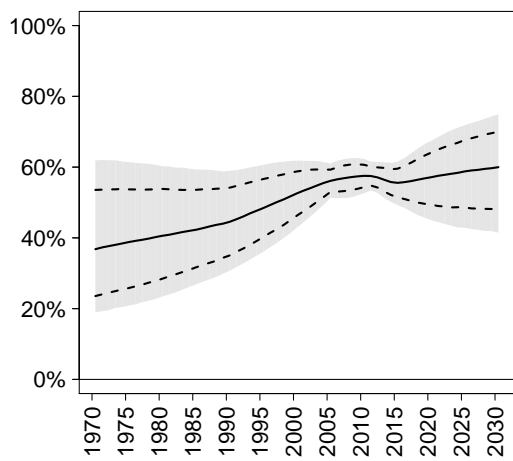

**Demand satisfied (any method)**

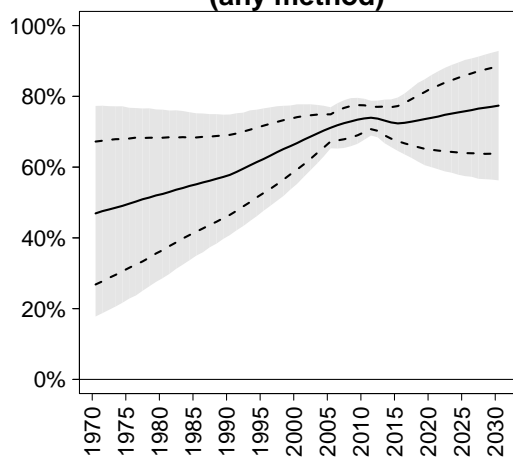

**Demand satisfied (modern methods)**

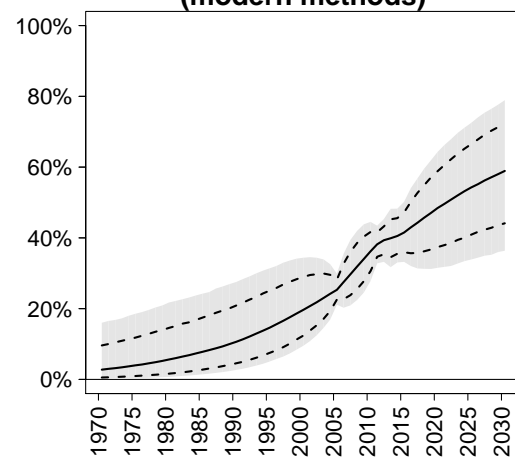



Costa Rica --- All women

**CP (any)**

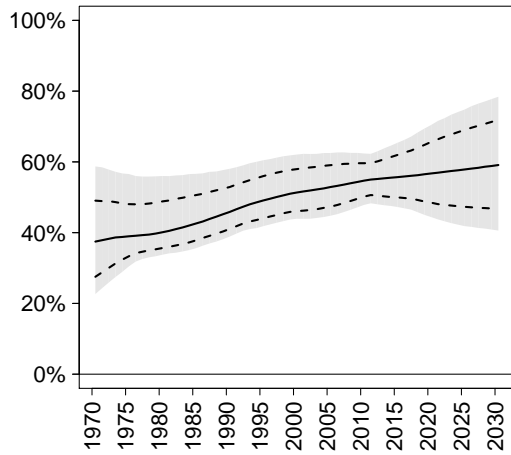

**CP (modern)**

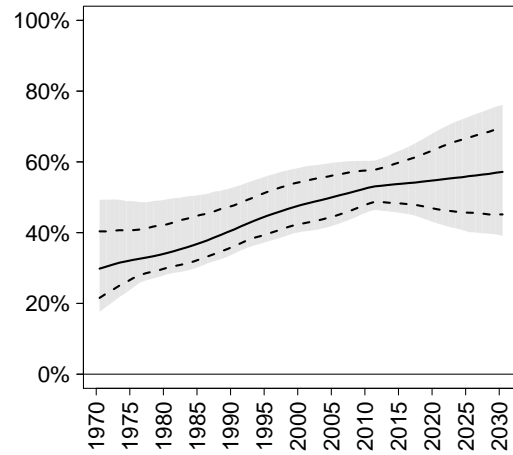

**CP (traditional)**

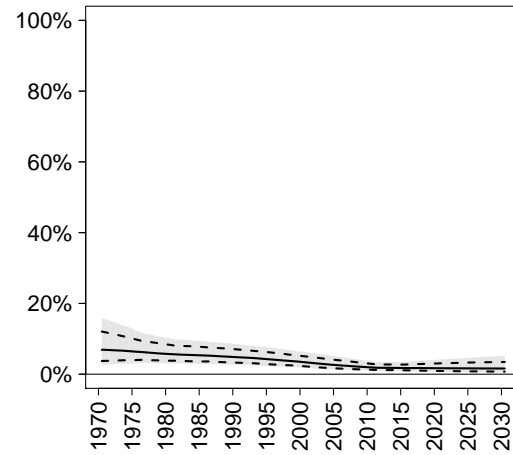

**Unmet need among all unmarried women**

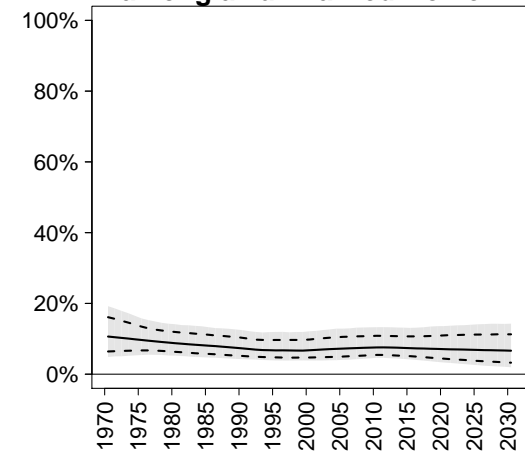

**Total demand**

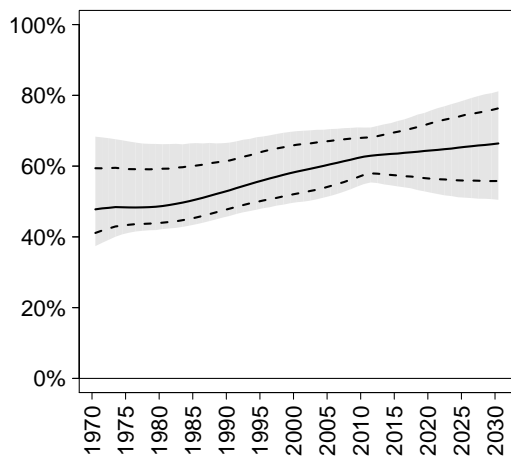

**Demand satisfied (any method)**

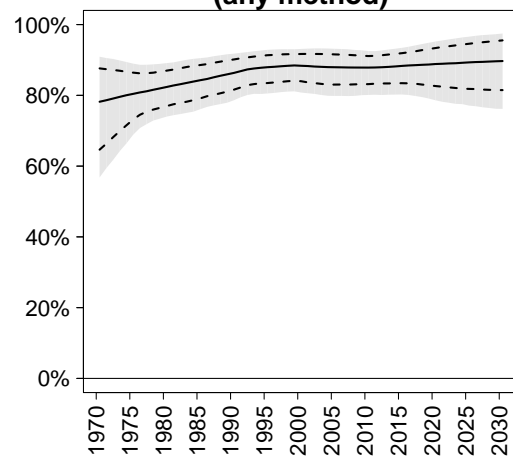

**Demand satisfied (modern methods)**

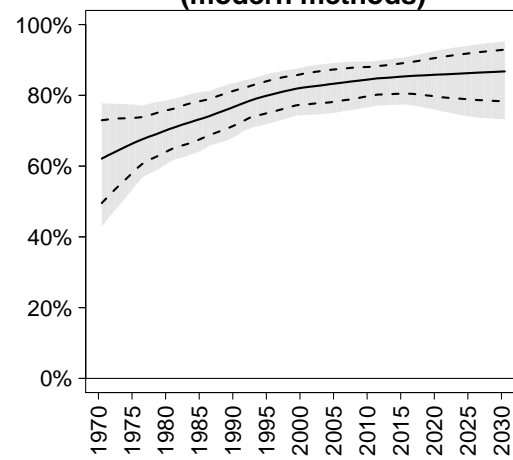

Côte d'Ivoire --- All women

**CP (any)**

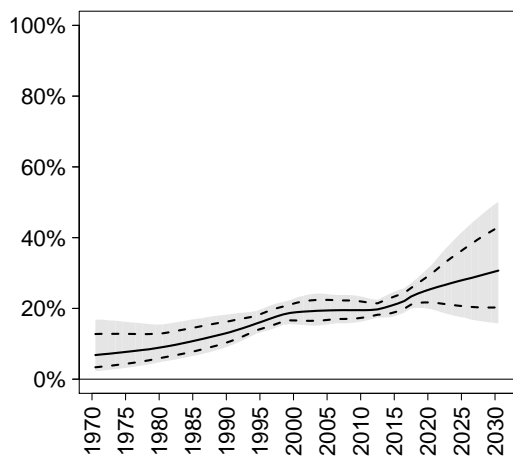

**CP (modern)**

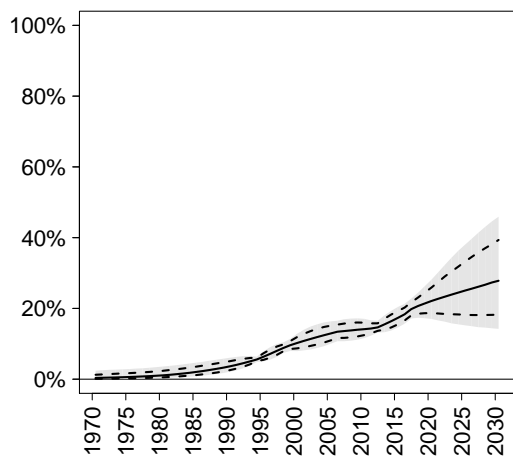

**CP (traditional)**

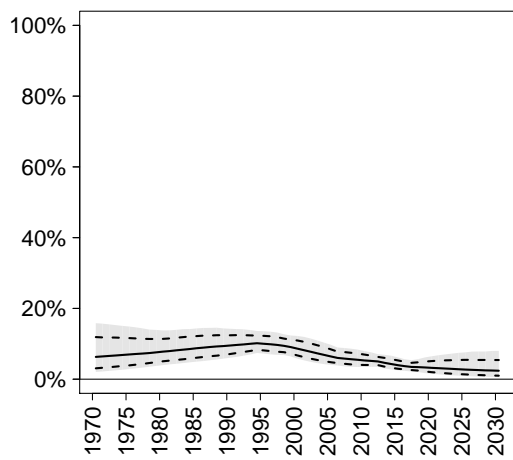

**Unmet need among all unmarried women**

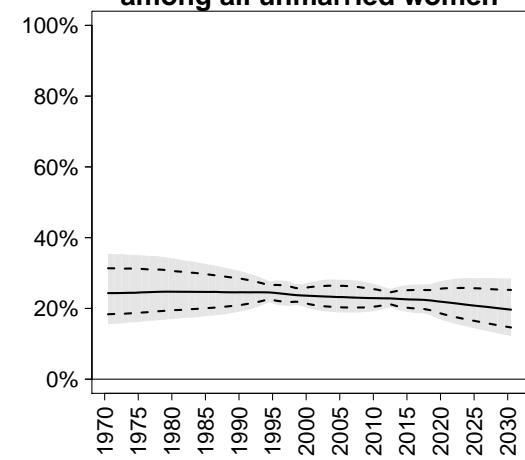

**Total demand**

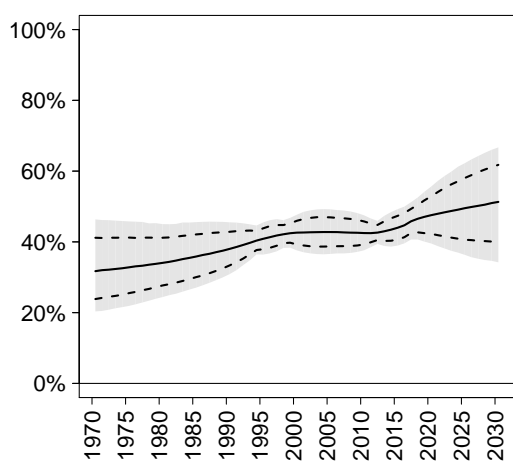

**Demand satisfied (any method)**

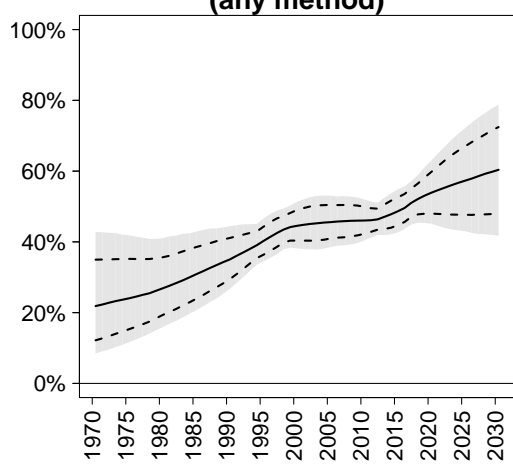

**Demand satisfied (modern methods)**

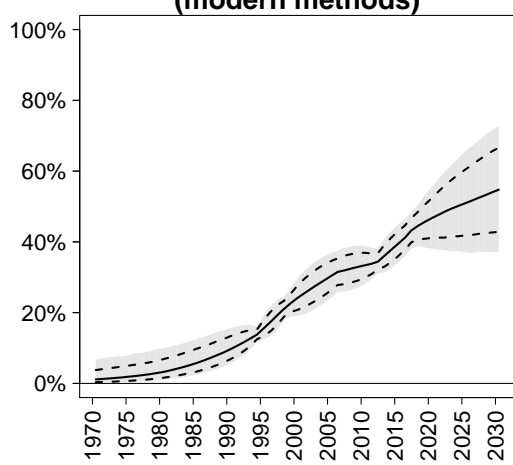

Croatia --- All women

**CP (any)**

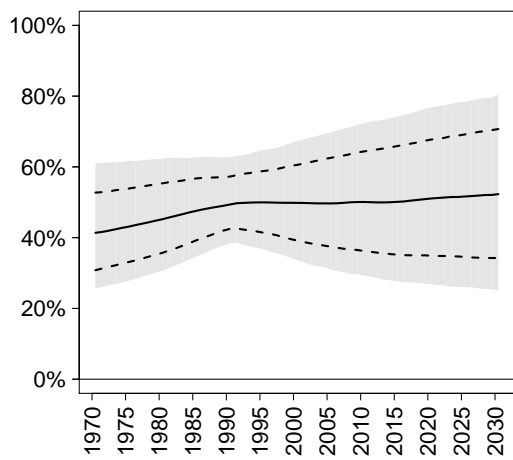

**CP (modern)**

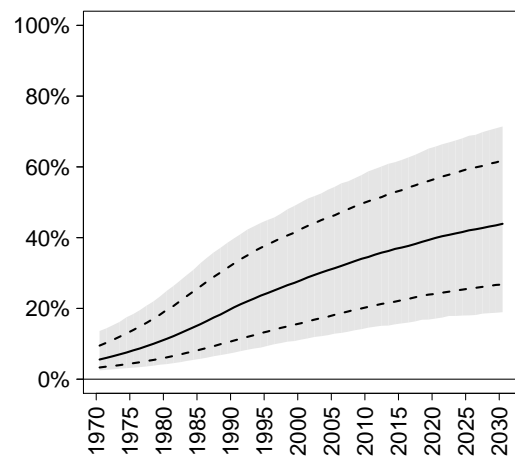

**CP (traditional)**

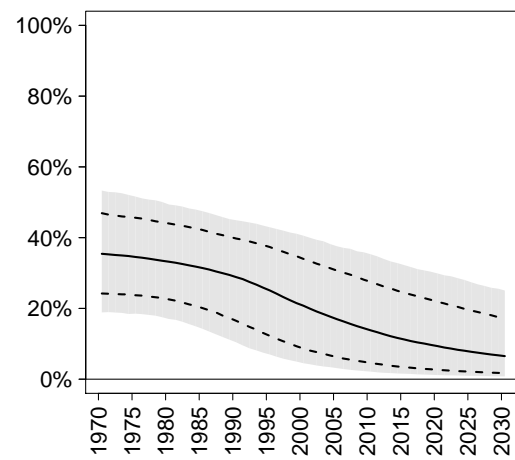

**Unmet need among all unmarried women**

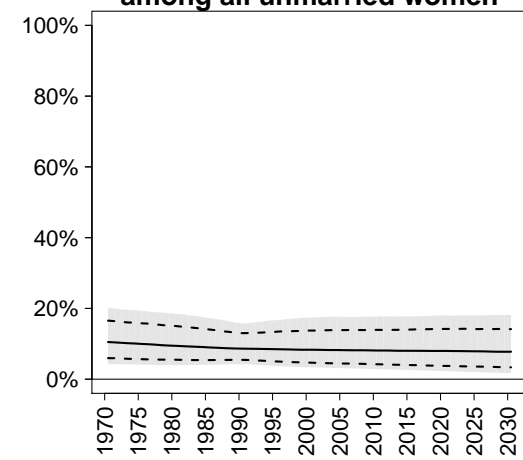

**Total demand**

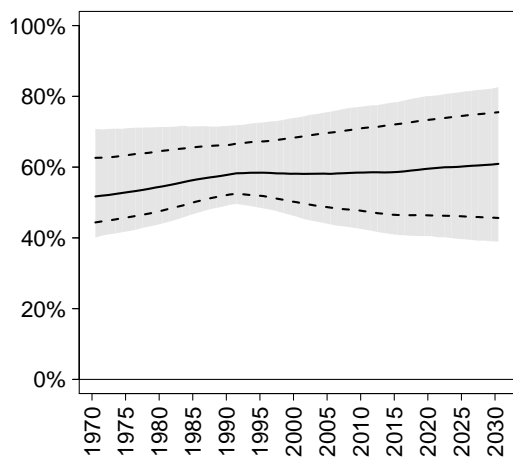

**Demand satisfied (any method)**

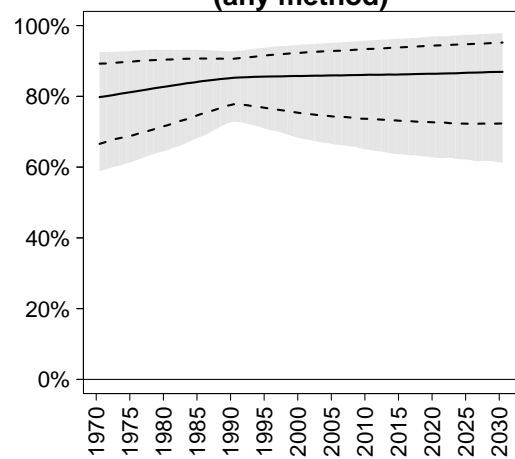

**Demand satisfied (modern methods)**

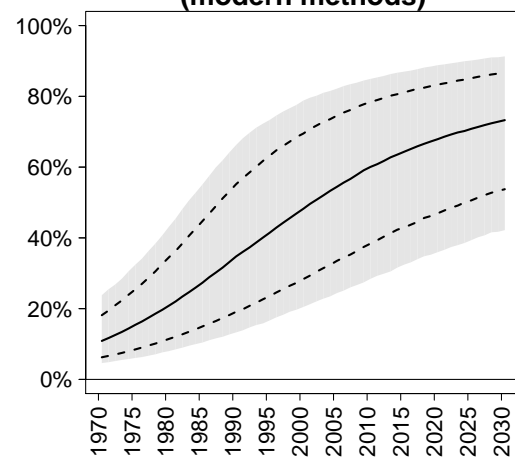

Cuba --- All women

**CP (any)**

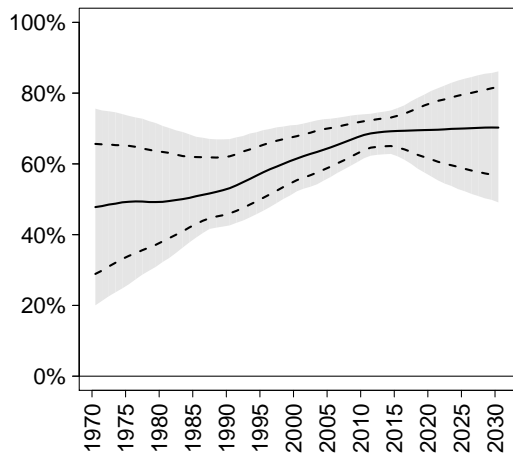

**CP (modern)**

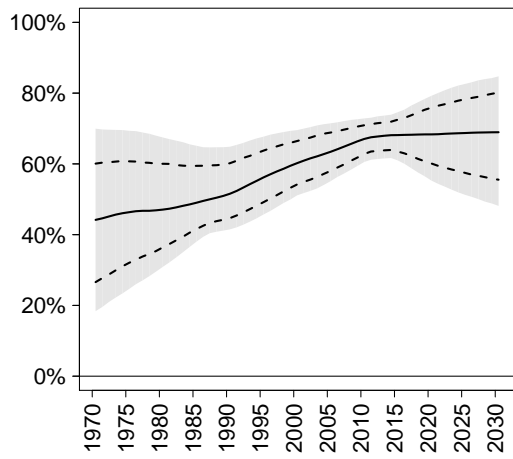

**CP (traditional)**

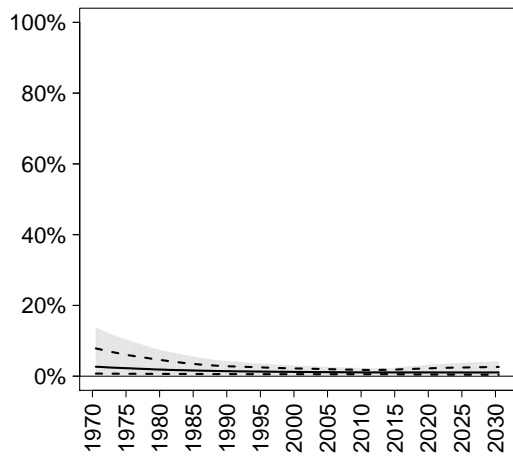

**Unmet need among all unmarried women**

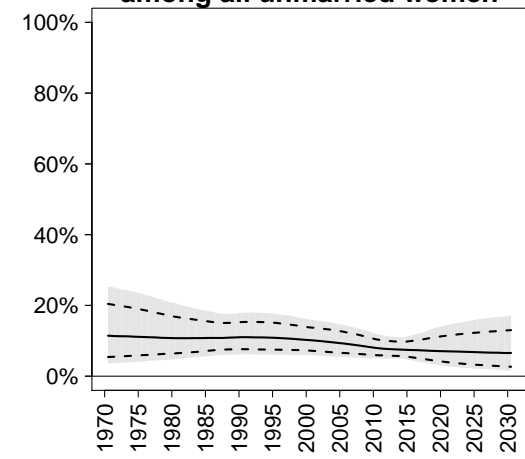

**Total demand**

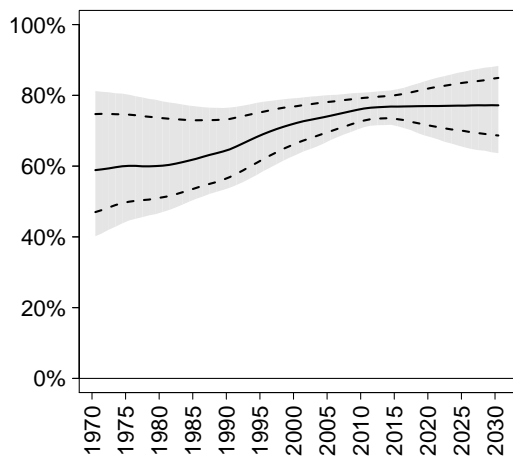

**Demand satisfied (any method)**

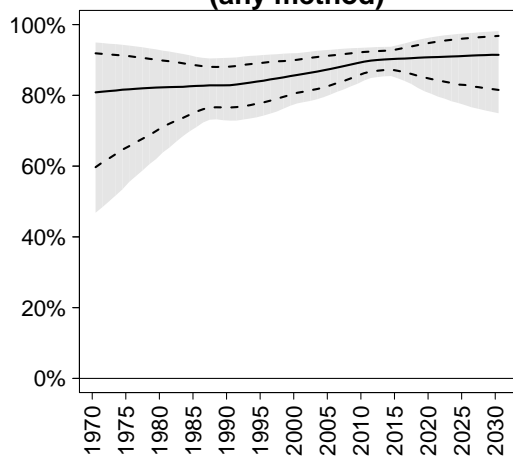

**Demand satisfied (modern methods)**

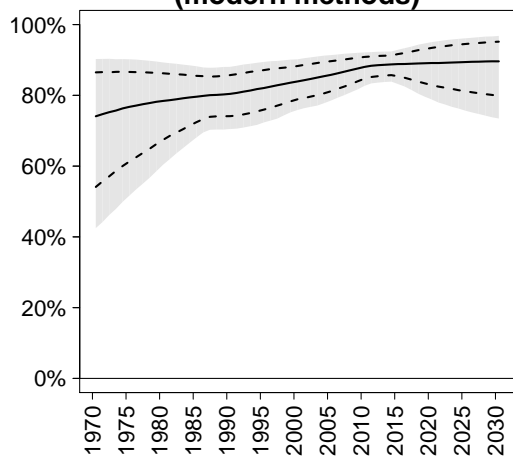

Czechia --- All women

**CP (any)**

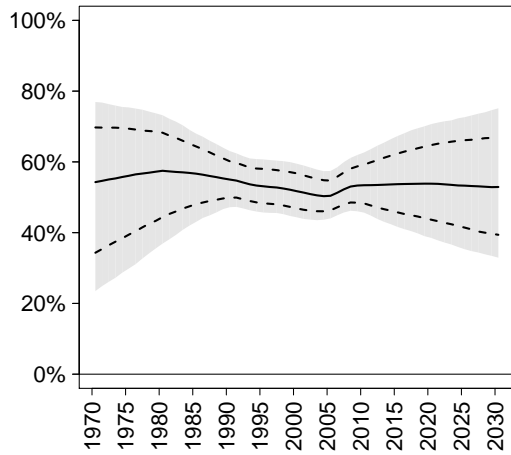

**CP (modern)**

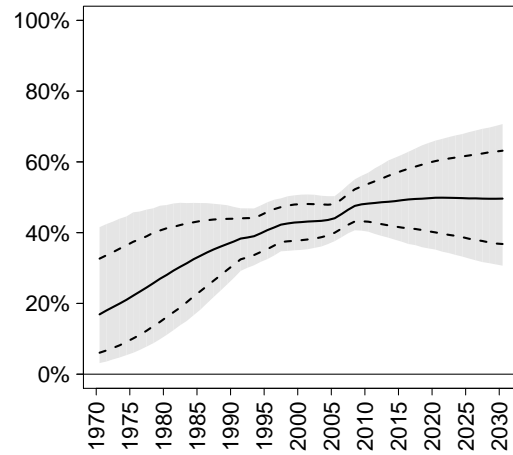

**CP (traditional)**

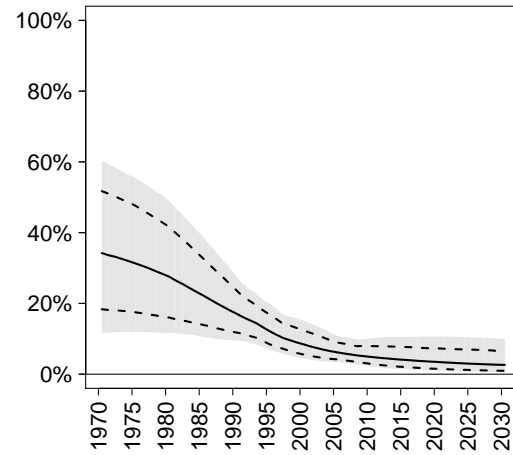

**Unmet need among all unmarried women**

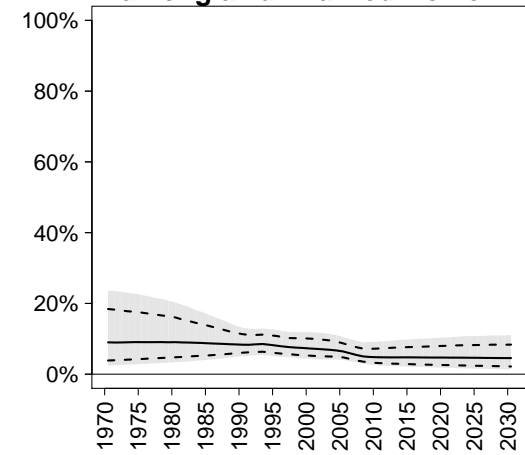

**Total demand**

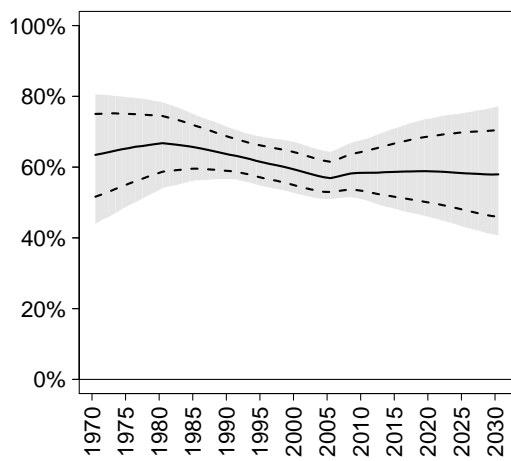

**Demand satisfied (any method)**

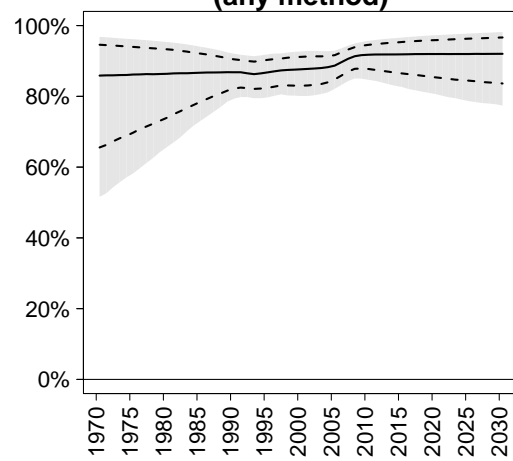

**Demand satisfied (modern methods)**

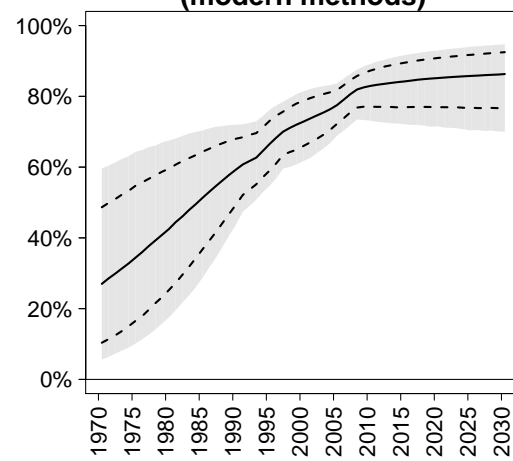

Democratic People's Republic of Korea --- All women

**CP (any)**

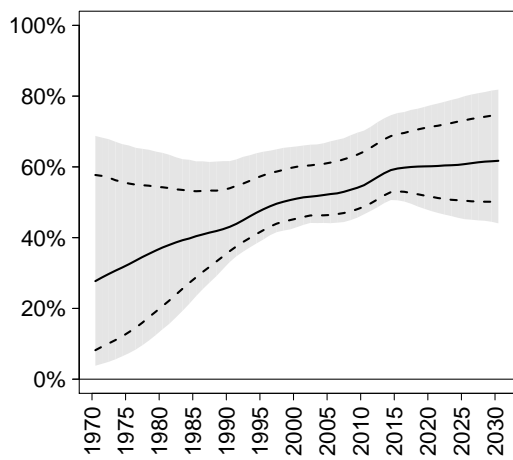

**CP (modern)**

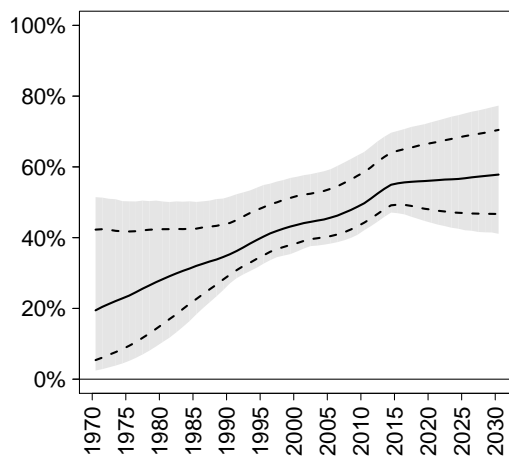

**CP (traditional)**

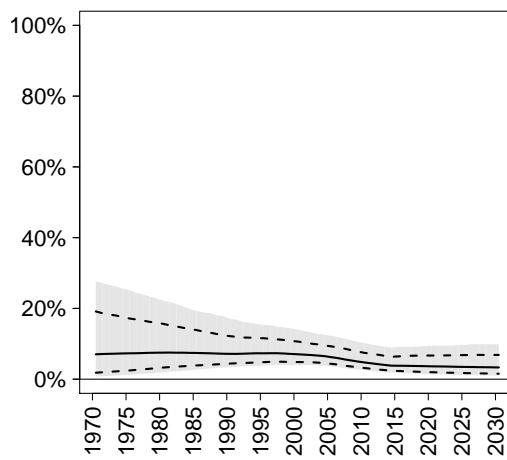

**Unmet need among all unmarried women**

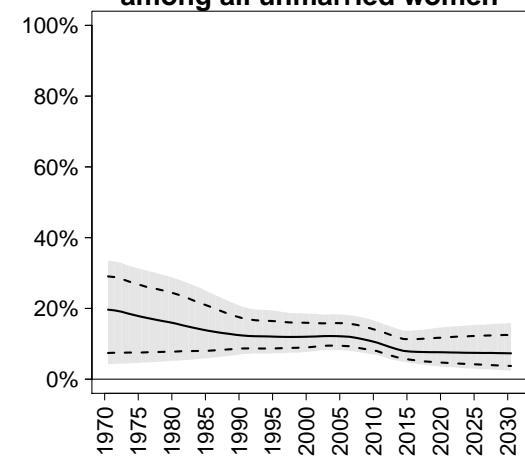

**Total demand**

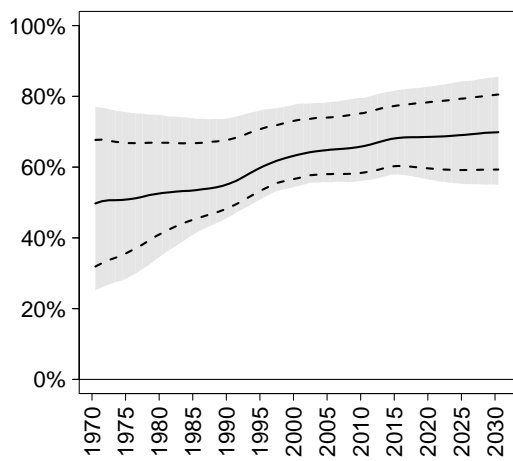

**Demand satisfied (any method)**

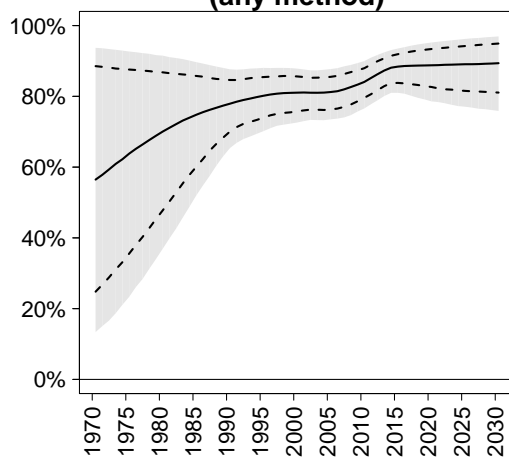

**Demand satisfied (modern methods)**

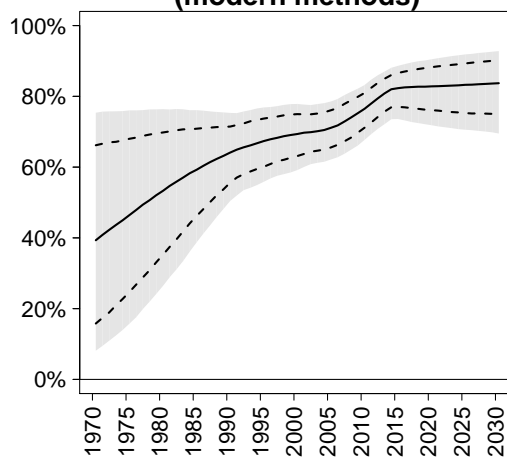

Democratic Republic of the Congo --- All women

**CP (any)**

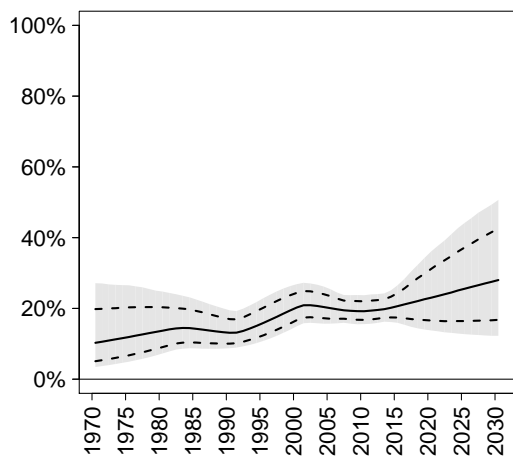

**CP (modern)**

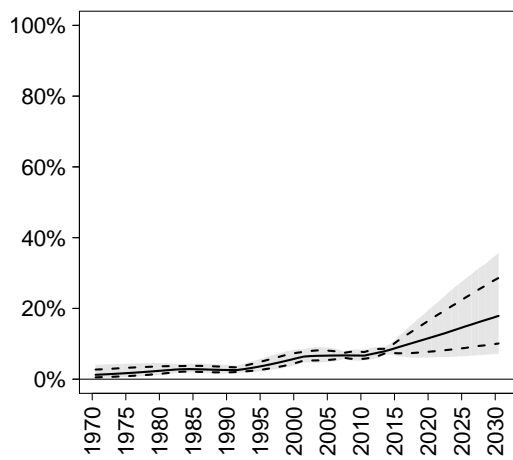

**CP (traditional)**

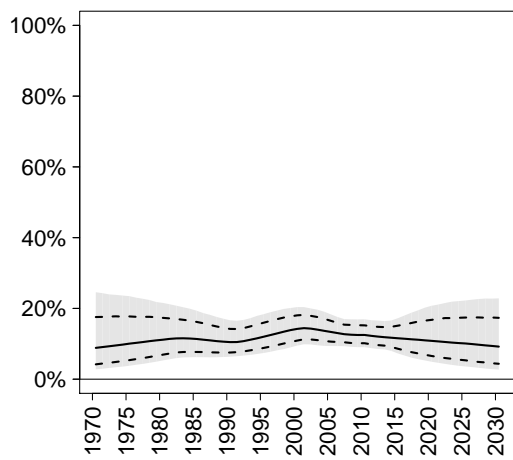

**Unmet need among all unmarried women**

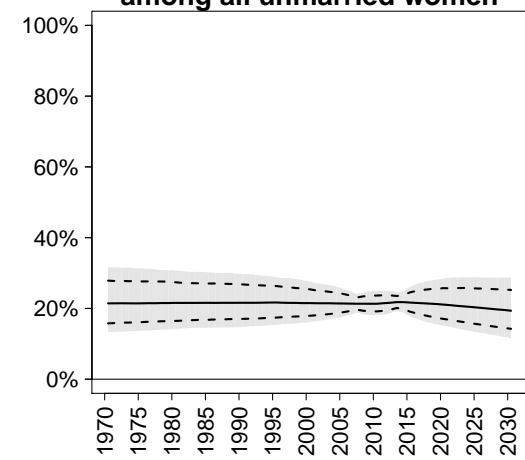

**Total demand**

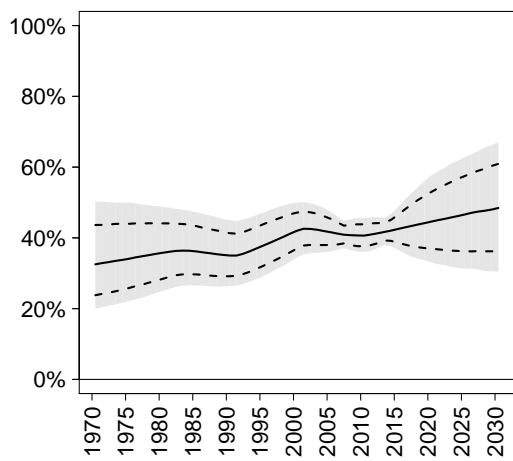

**Demand satisfied (any method)**

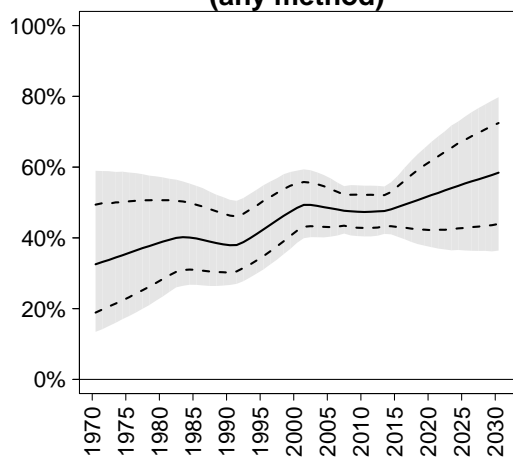

**Demand satisfied (modern methods)**

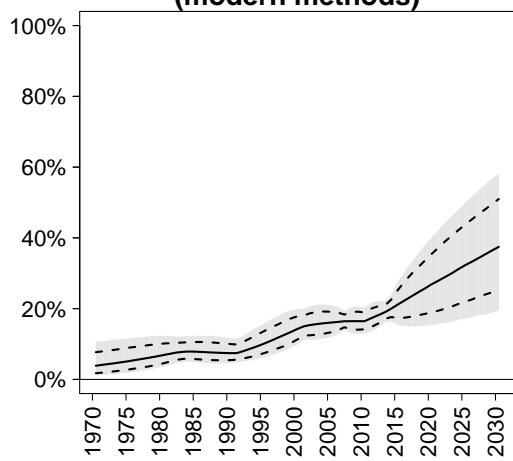

Denmark --- All women

**CP (any)**

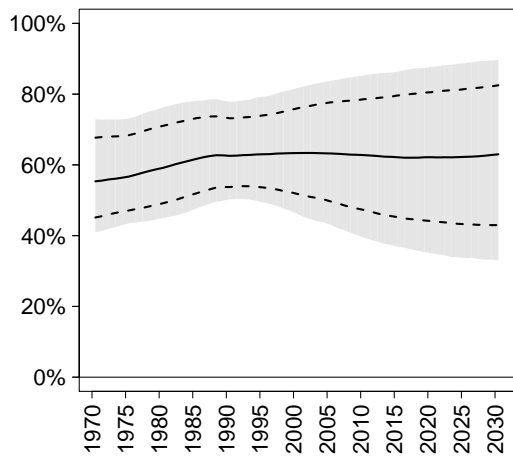

**CP (modern)**

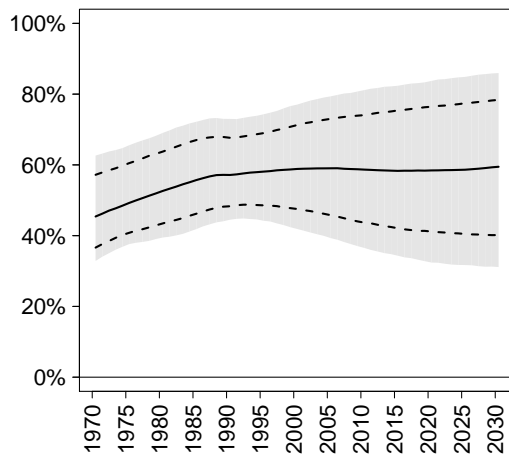

**CP (traditional)**

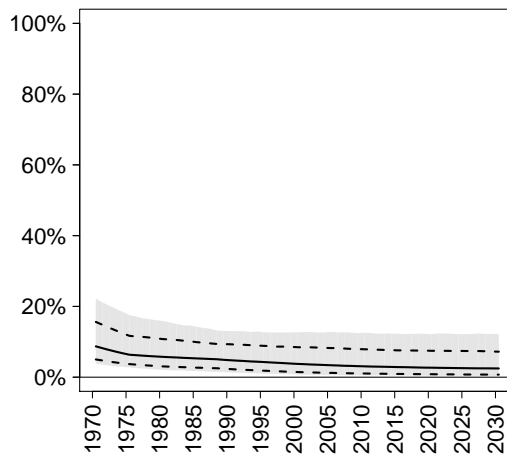

**Unmet need among all unmarried women**

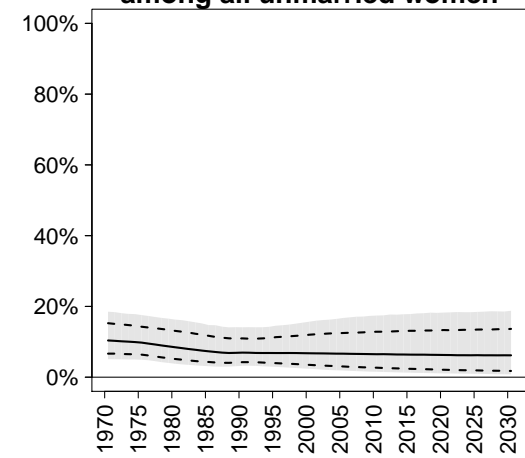

**Total demand**

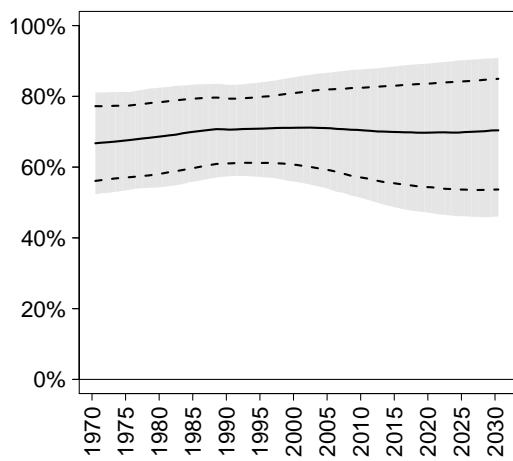

**Demand satisfied (any method)**

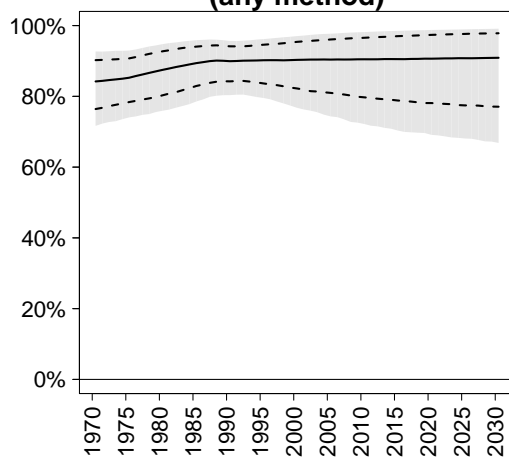

**Demand satisfied (modern methods)**

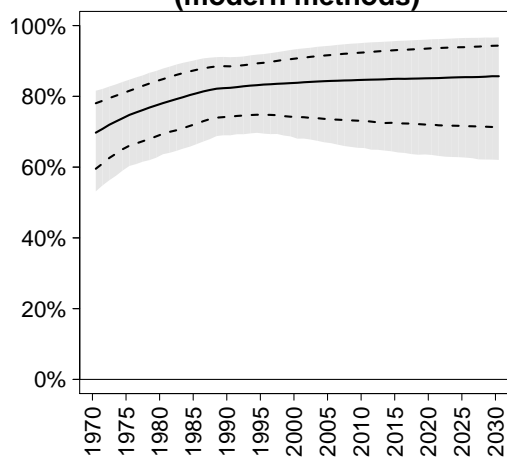



Djibouti --- All women

**CP (any)**

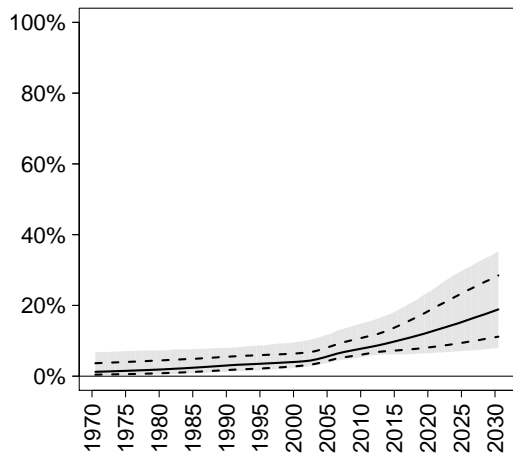

**CP (modern)**

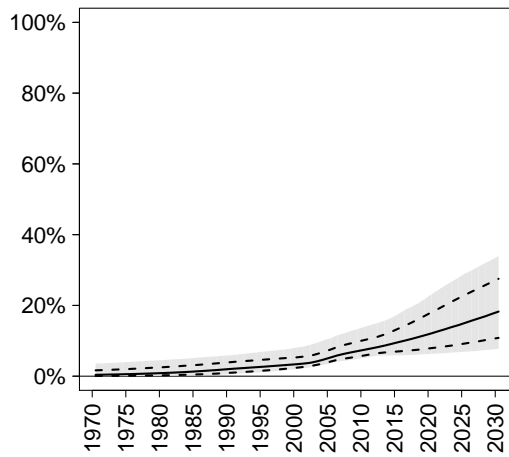

**CP (traditional)**

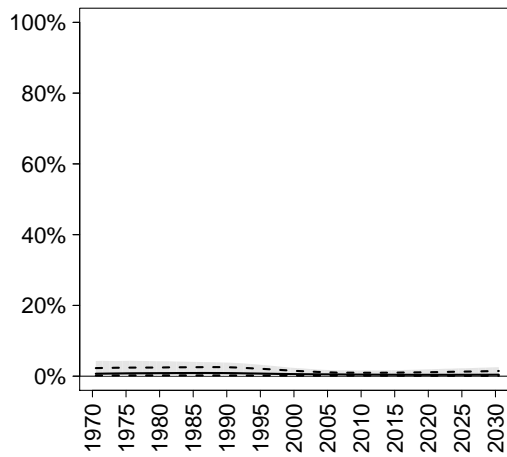

**Unmet need among all unmarried women**

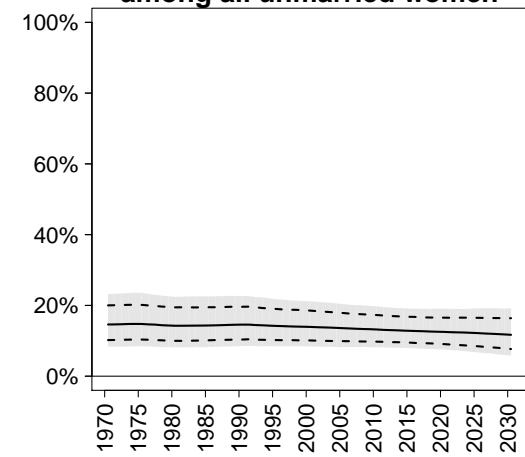

**Total demand**

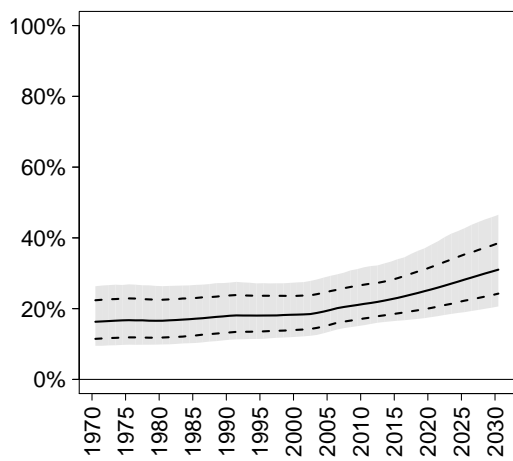

Dominican Republic --- All women

**CP (any)**

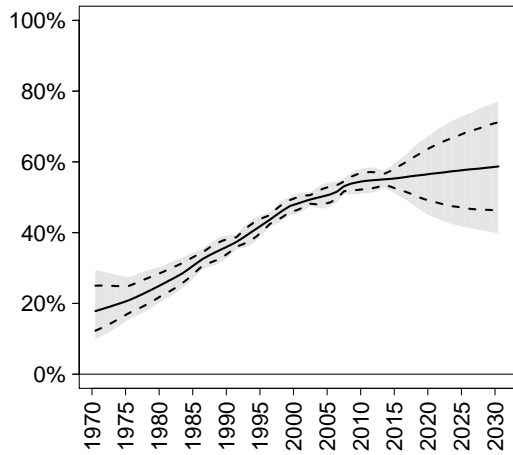

**CP (modern)**

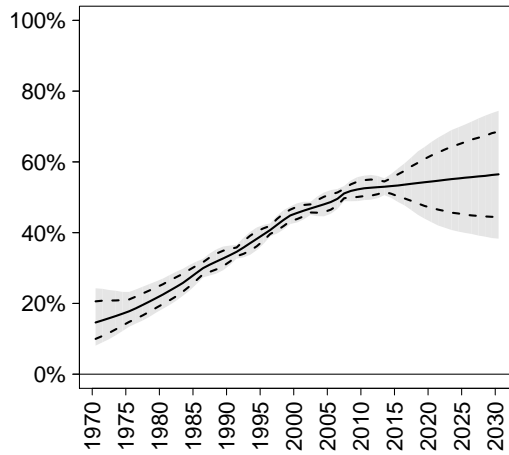

**CP (traditional)**

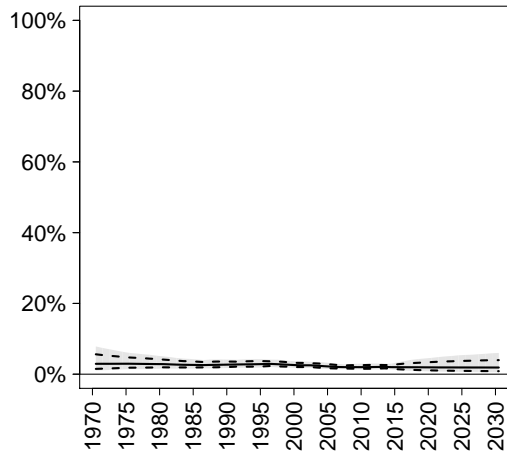

**Unmet need among all unmarried women**

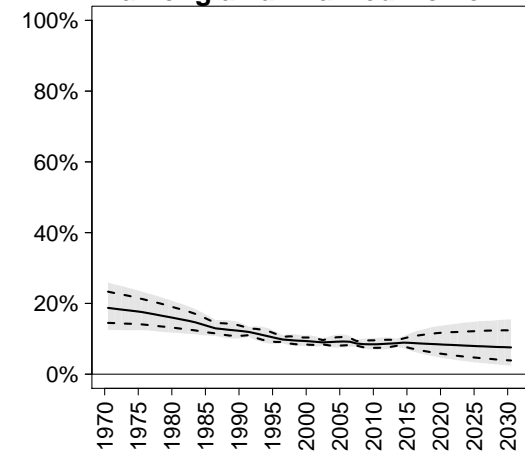

**Total demand**

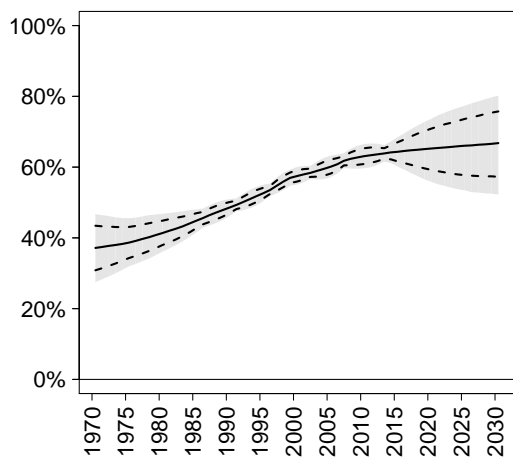

**Demand satisfied (any method)**

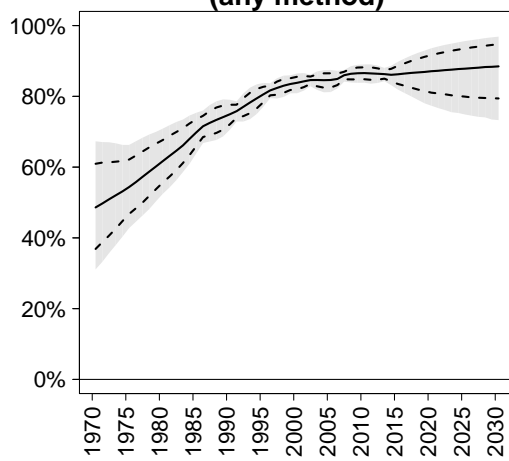

**Demand satisfied (modern methods)**

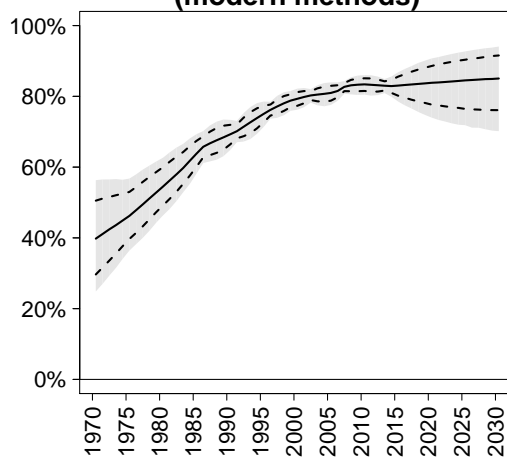

Ecuador --- All women

**CP (any)**

**CP (modern)**

**CP (traditional)**

**Unmet need  
among all unmarried women**

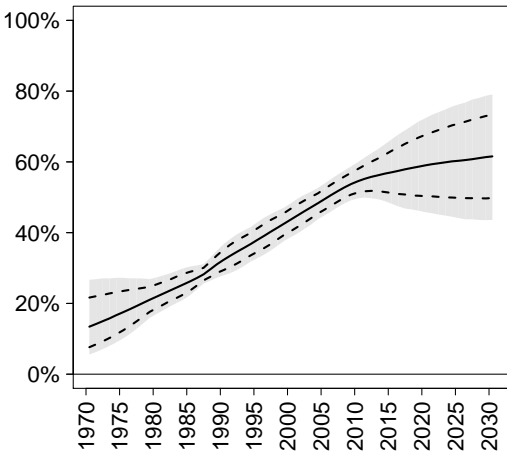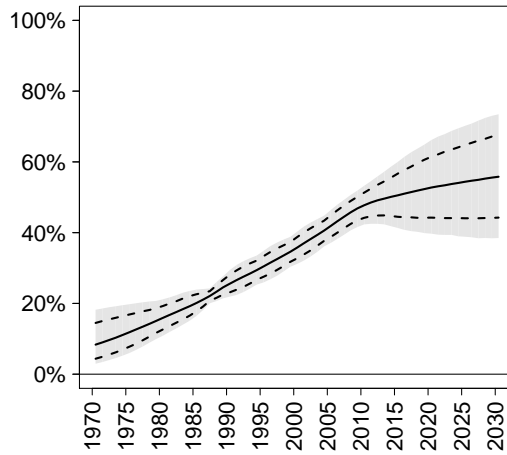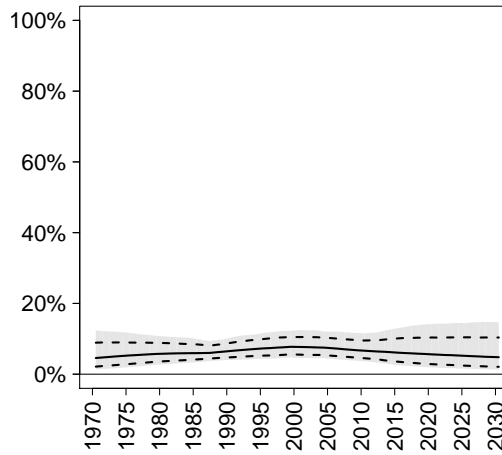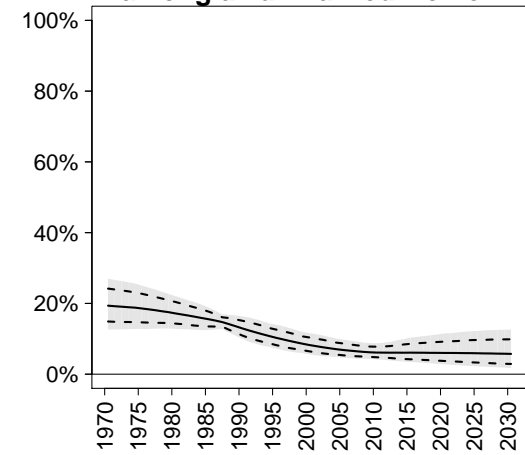

**Total demand**

**Demand satisfied  
(any method)**

**Demand satisfied  
(modern methods)**

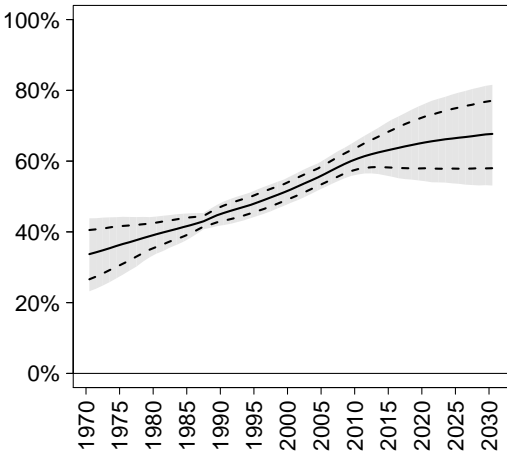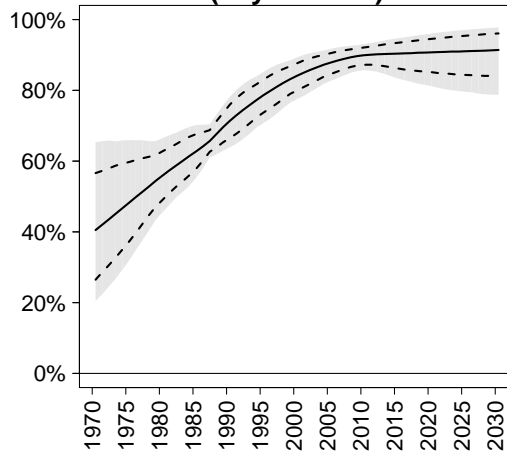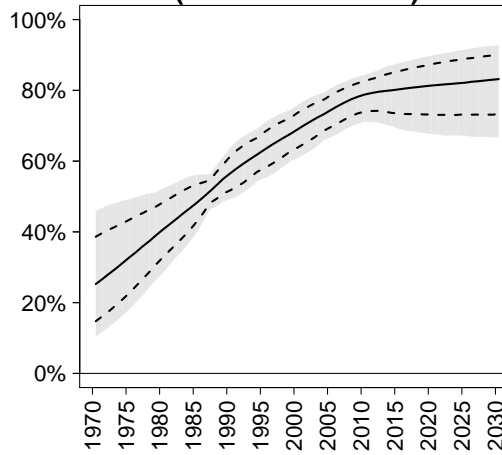

Egypt --- All women

**CP (any)**

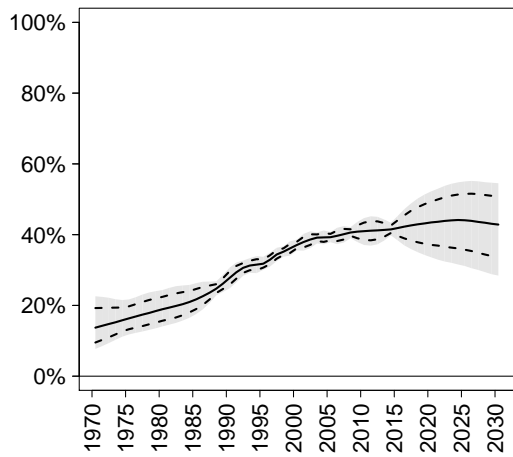

**CP (modern)**

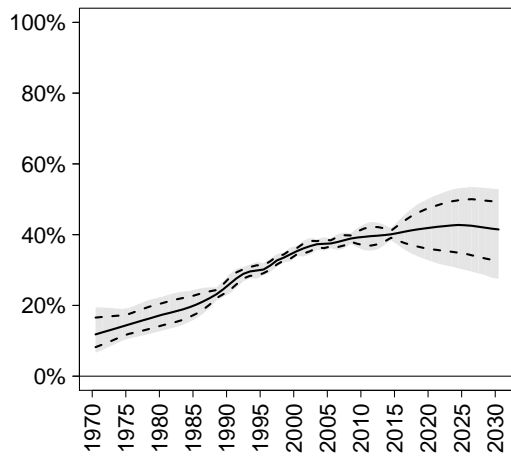

**CP (traditional)**

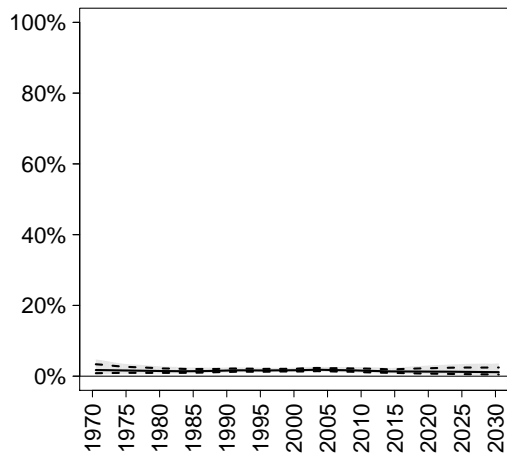

**Unmet need among all unmarried women**

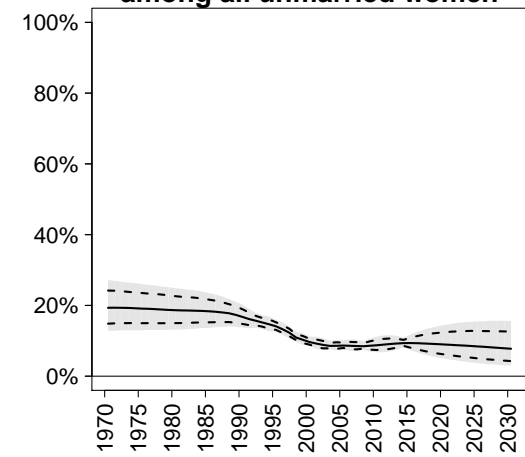

**Total demand**

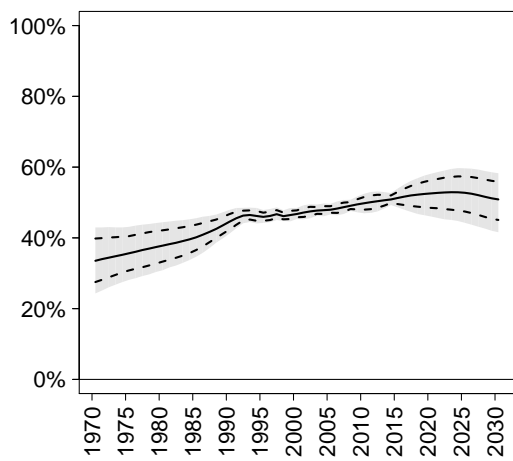

**Demand satisfied (any method)**

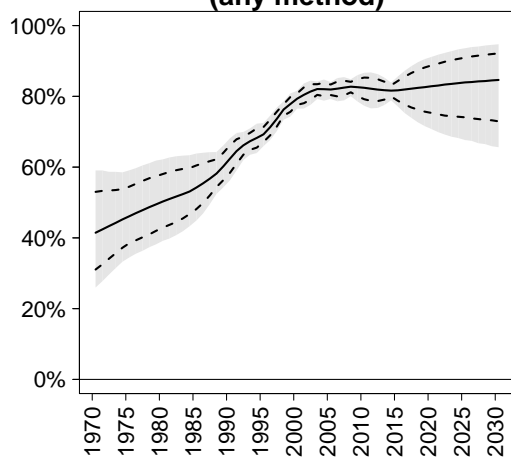

**Demand satisfied (modern methods)**

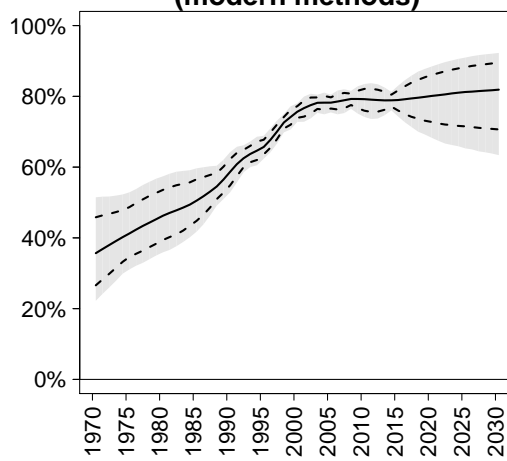

El Salvador --- All women

**CP (any)**

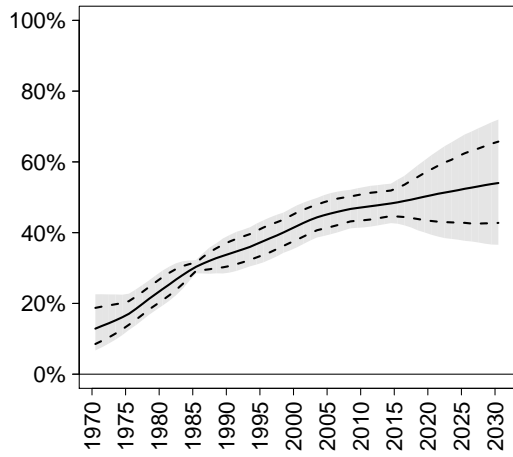

**CP (modern)**

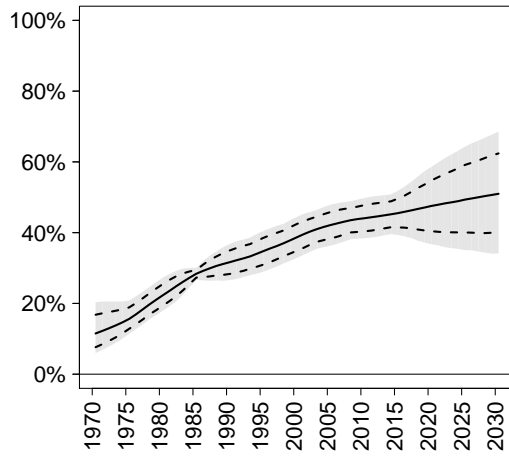

**CP (traditional)**

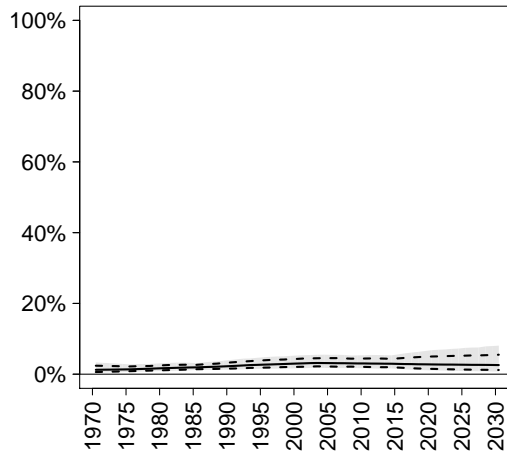

**Unmet need among all unmarried women**

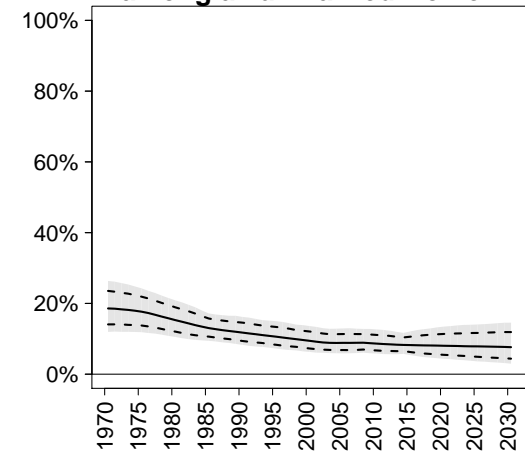

**Total demand**

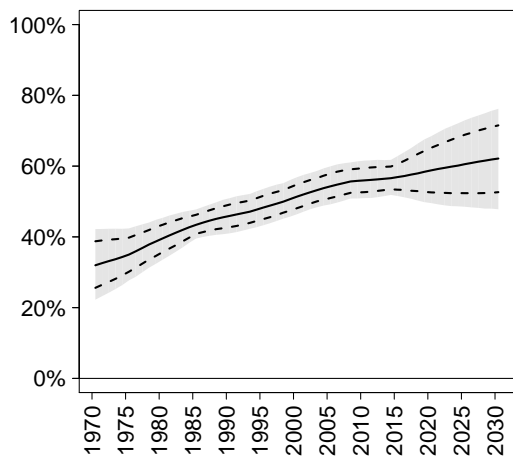

Equatorial Guinea --- All women

**CP (any)**

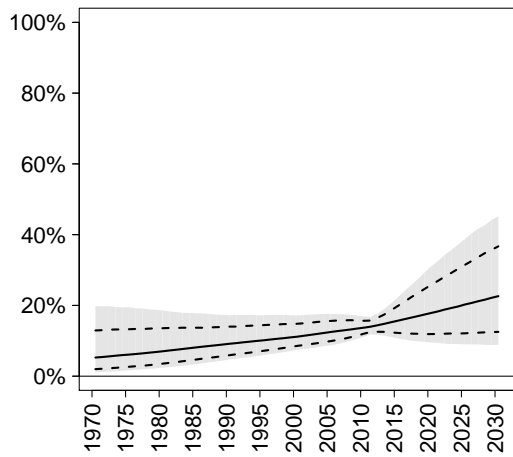

**CP (modern)**

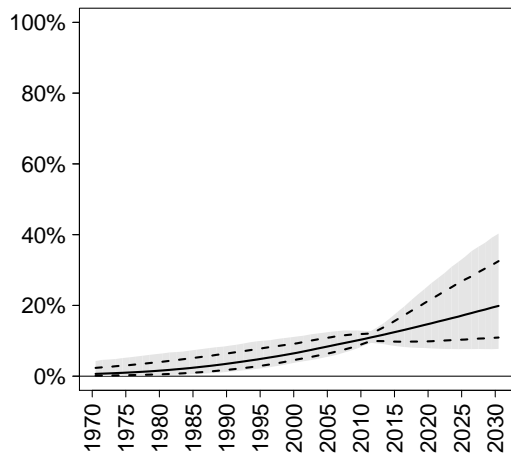

**CP (traditional)**

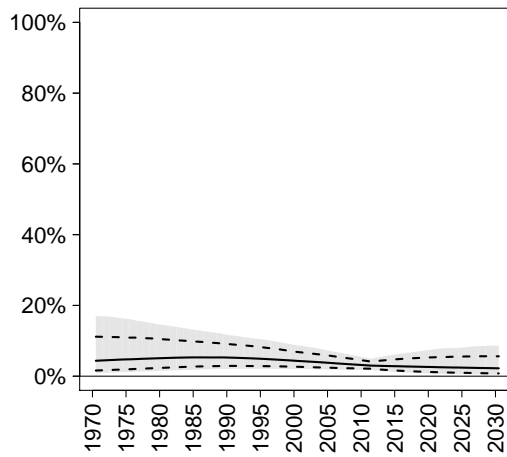

**Unmet need among all unmarried women**

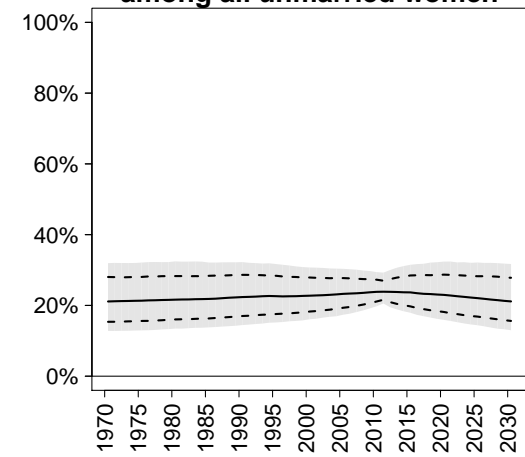

**Total demand**

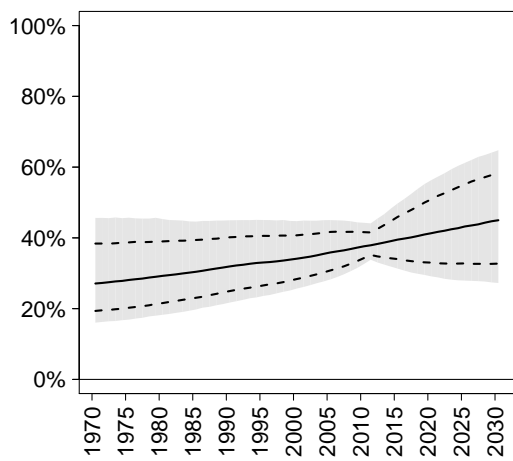

**Demand satisfied (any method)**

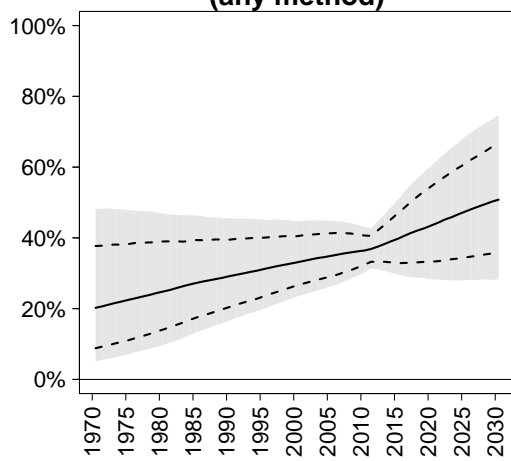

**Demand satisfied (modern methods)**

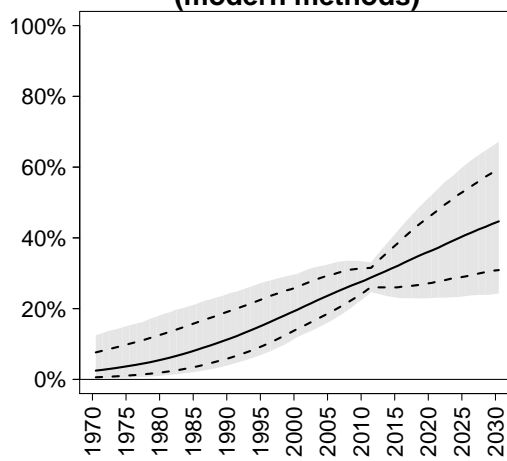

Eritrea --- All women

**CP (any)**

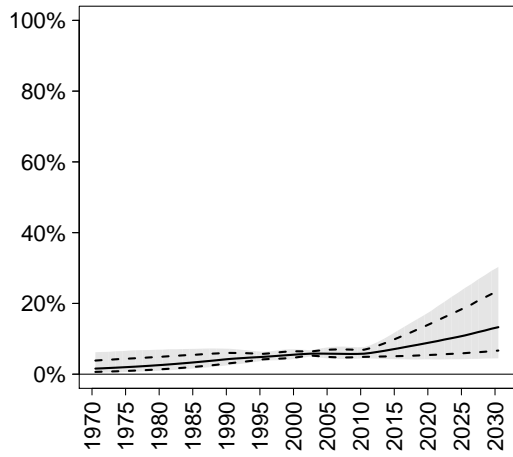

**CP (modern)**

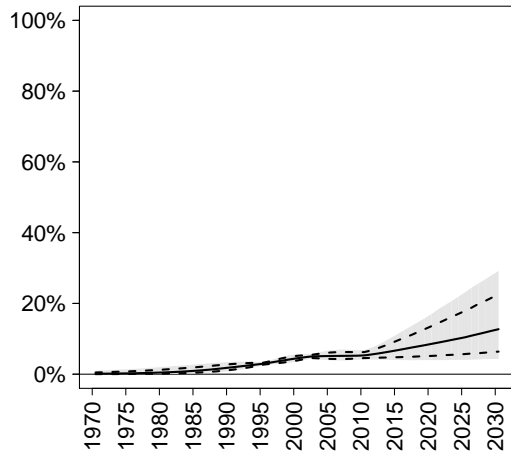

**CP (traditional)**

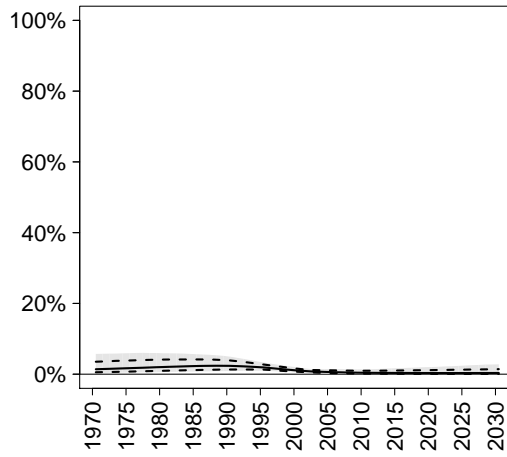

**Unmet need among all unmarried women**

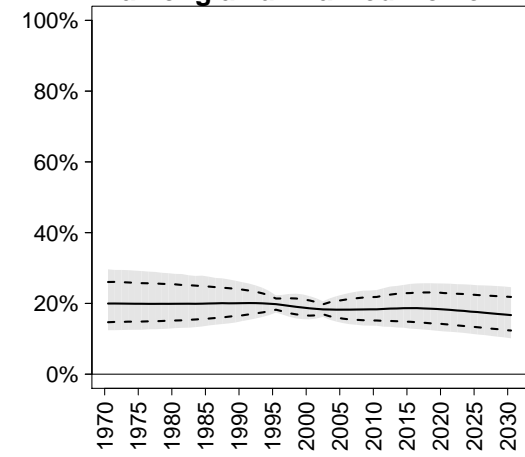

**Total demand**

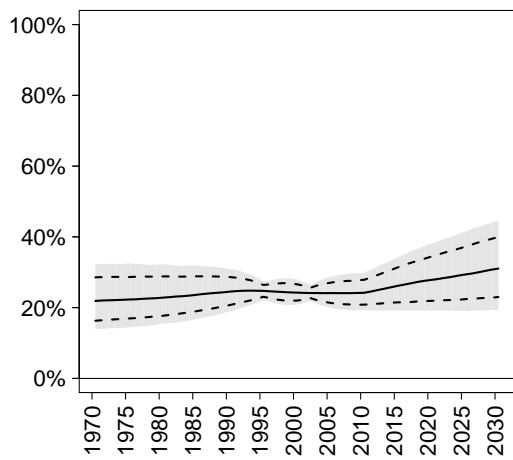

Estonia --- All women

**CP (any)**

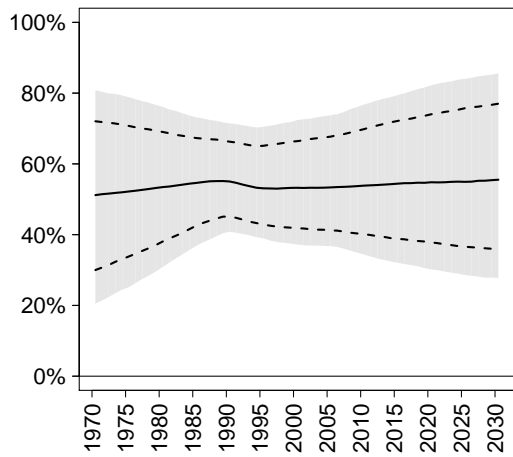

**CP (modern)**

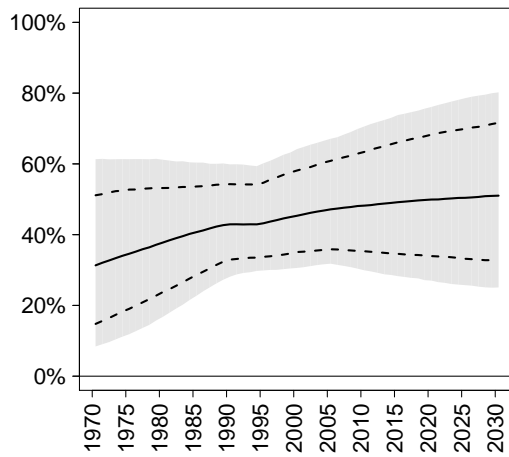

**CP (traditional)**

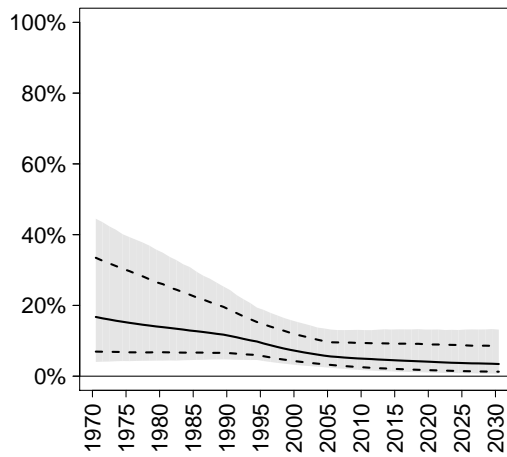

**Unmet need among all unmarried women**

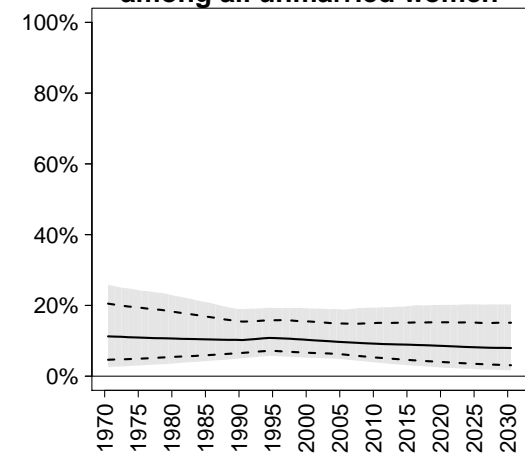

**Total demand**

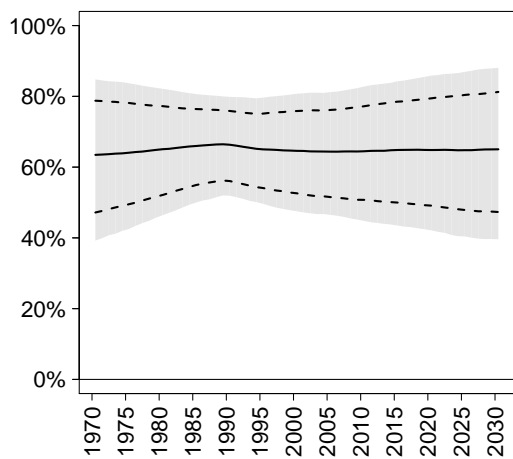

**Demand satisfied (any method)**

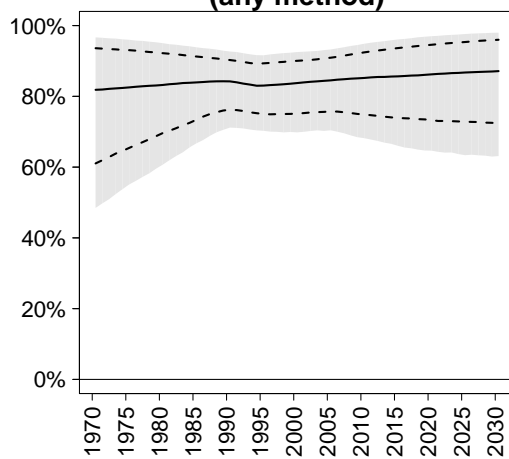

**Demand satisfied (modern methods)**

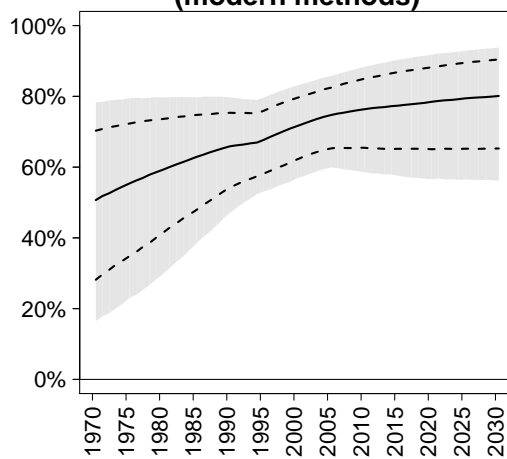



Eswatini --- All women

**CP (any)**

**CP (modern)**

**CP (traditional)**

**Unmet need  
among all unmarried women**

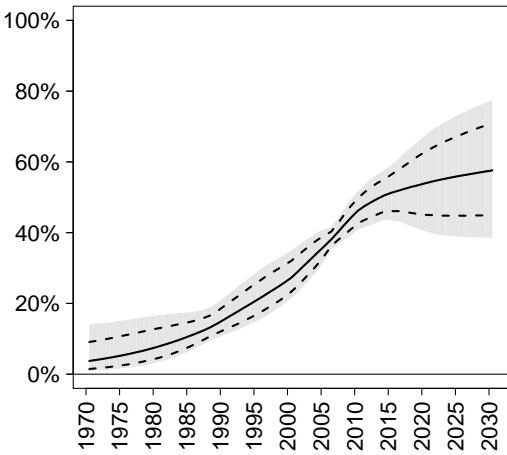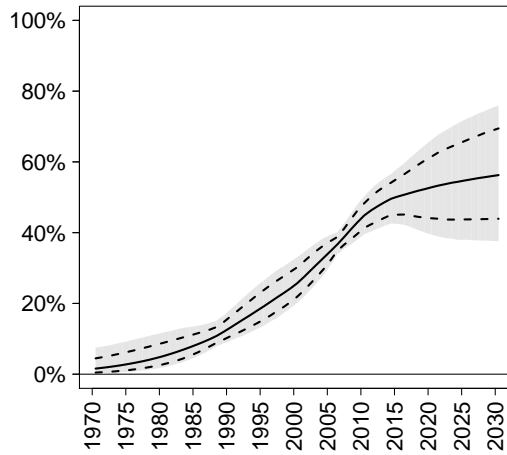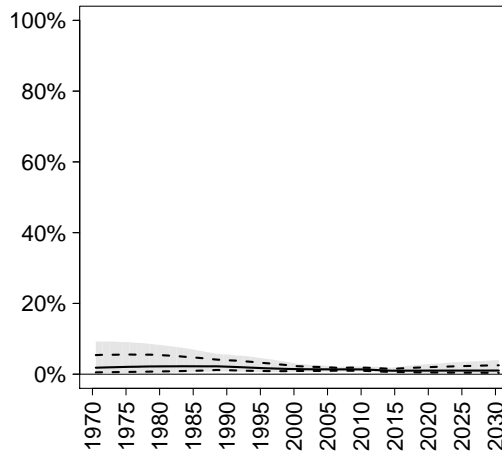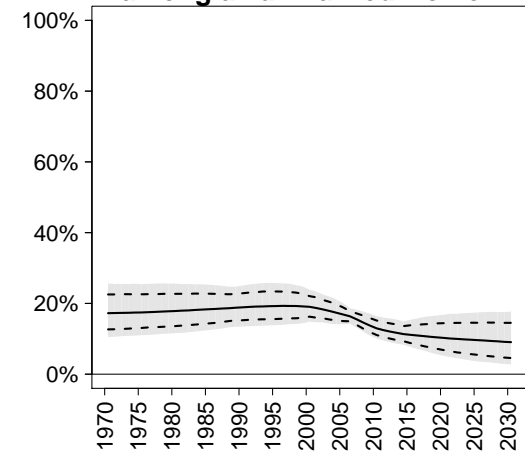

**Total demand**

**Demand satisfied  
(any method)**

**Demand satisfied  
(modern methods)**

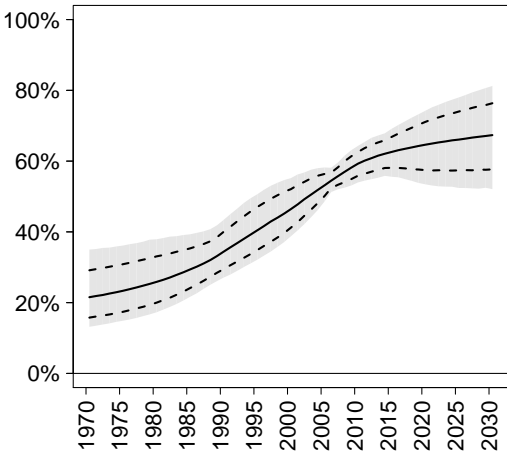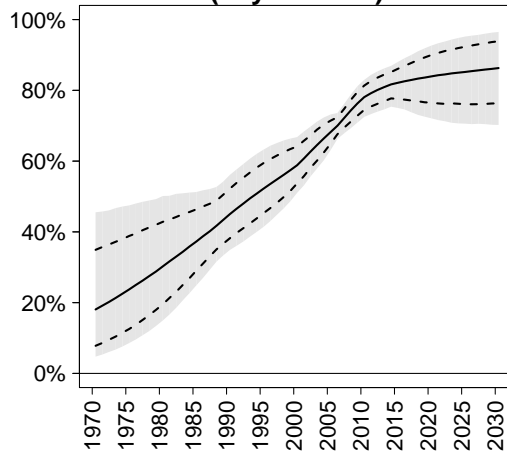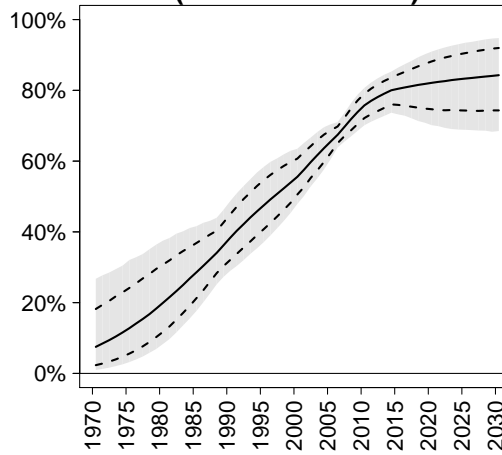

Ethiopia --- All women

**CP (any)**

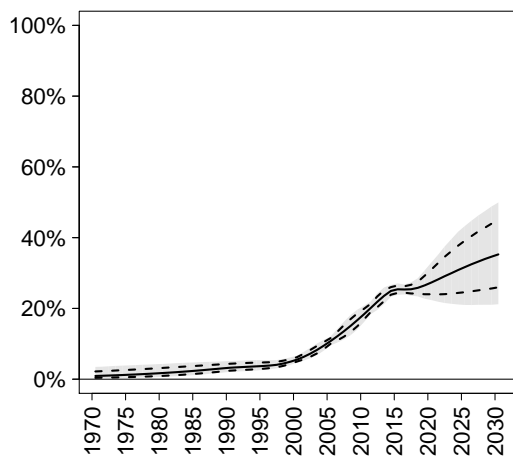

**CP (modern)**

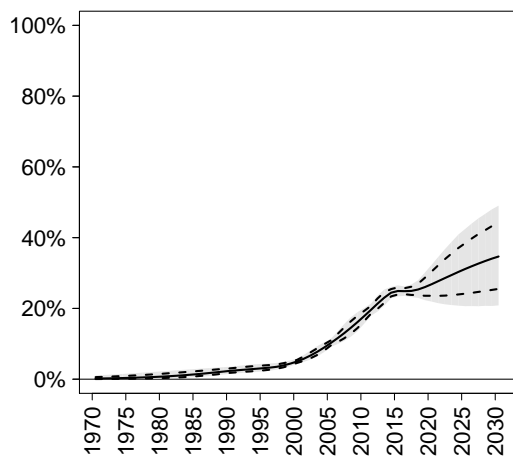

**CP (traditional)**

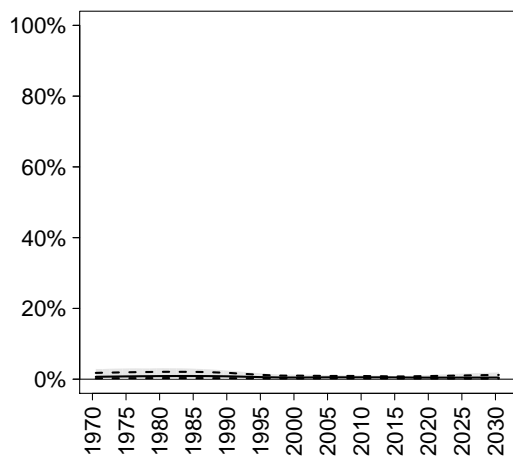

**Unmet need among all unmarried women**

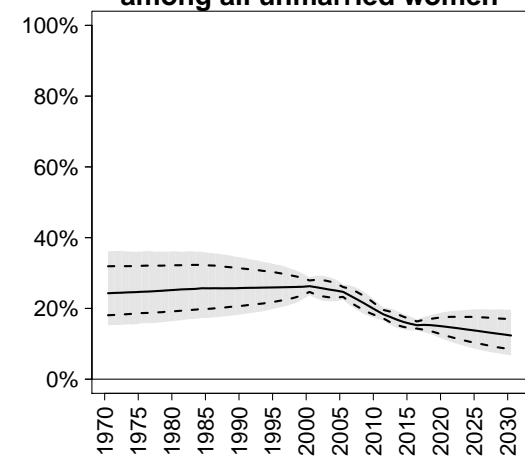

**Total demand**

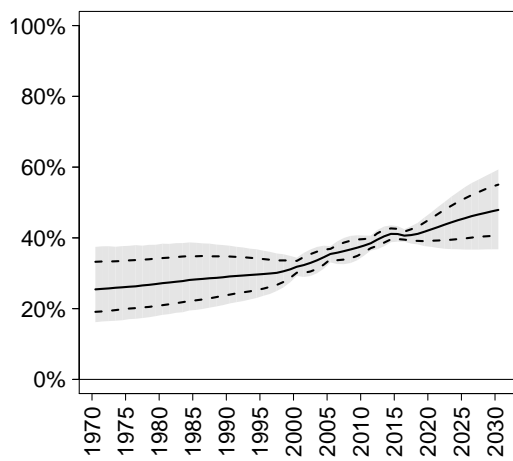

Fiji --- All women

**CP (any)**

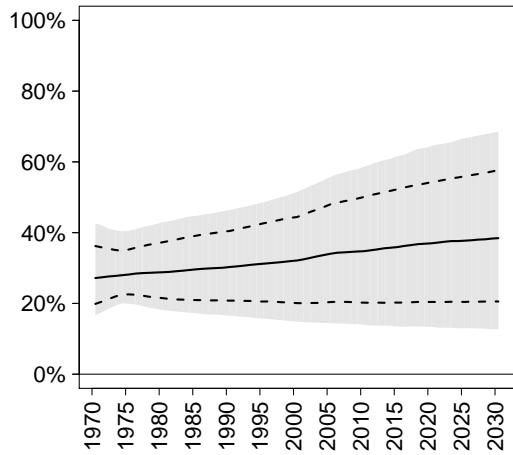

**CP (modern)**

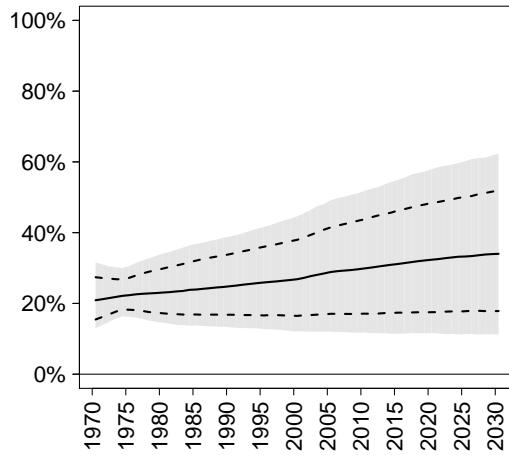

**CP (traditional)**

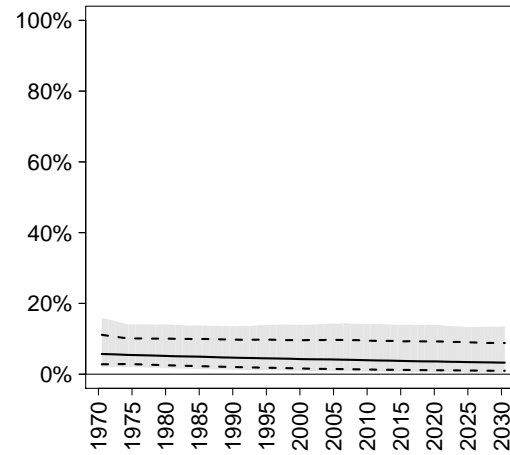

**Unmet need among all unmarried women**

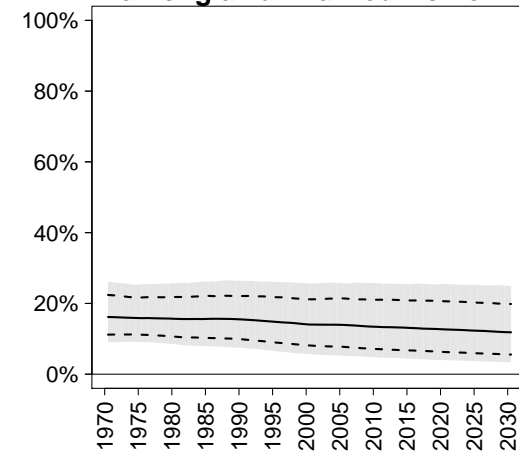

**Total demand**

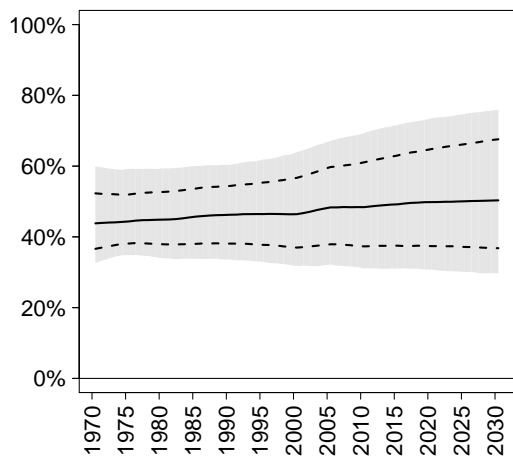

**Demand satisfied (any method)**

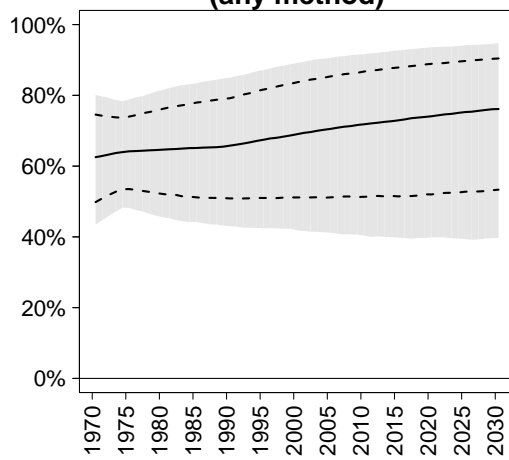

**Demand satisfied (modern methods)**

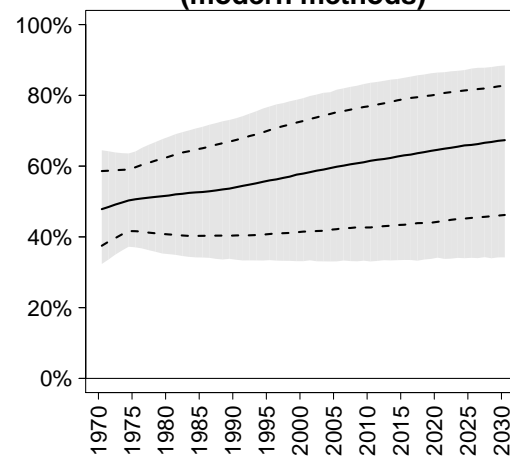

Finland --- All women

**CP (any)**

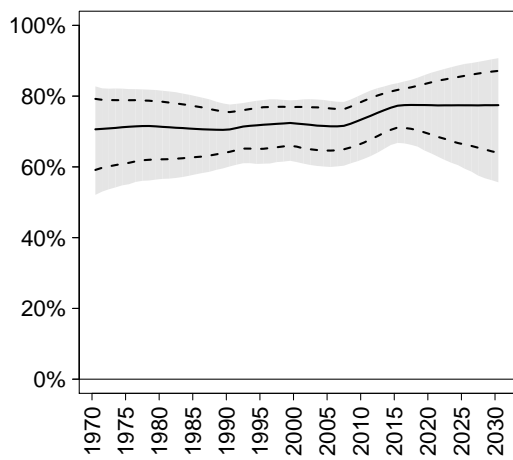

**CP (modern)**

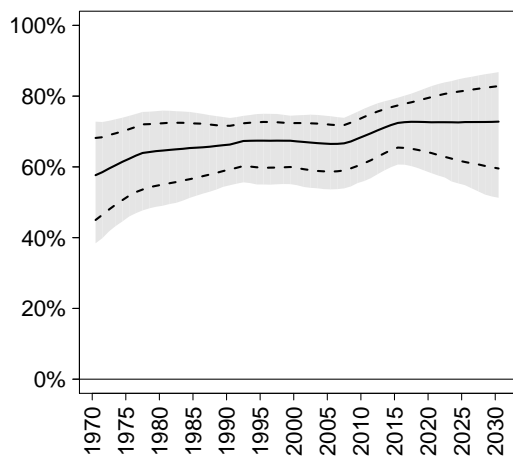

**CP (traditional)**

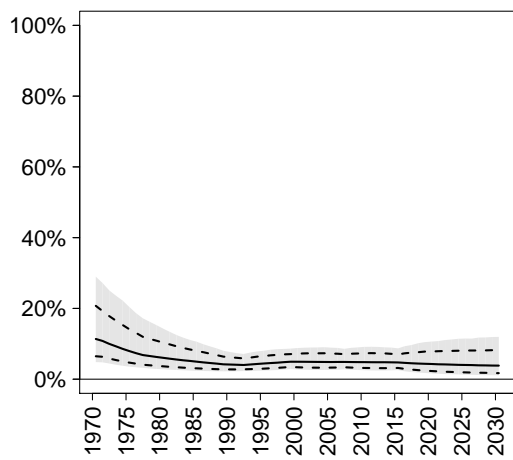

**Unmet need among all unmarried women**

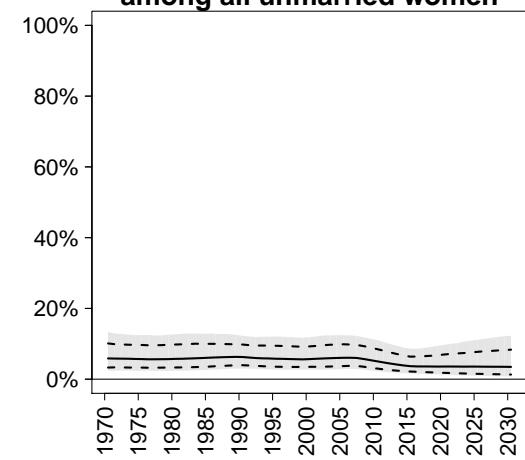

**Total demand**

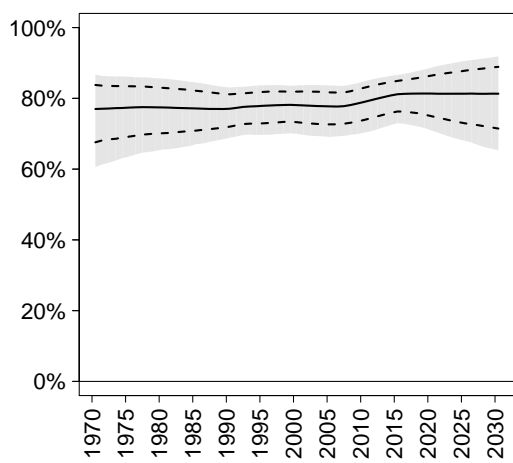

**Demand satisfied (any method)**

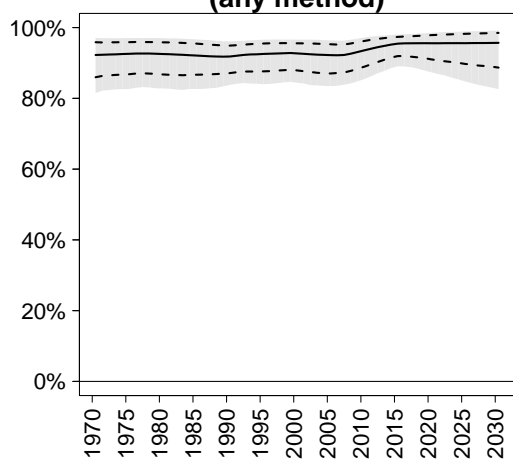

**Demand satisfied (modern methods)**

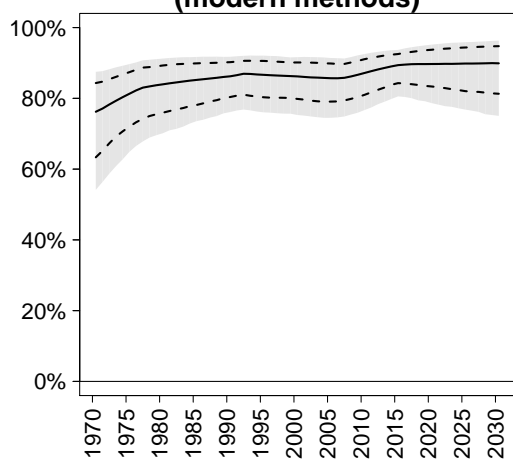

France --- All women

**CP (any)**

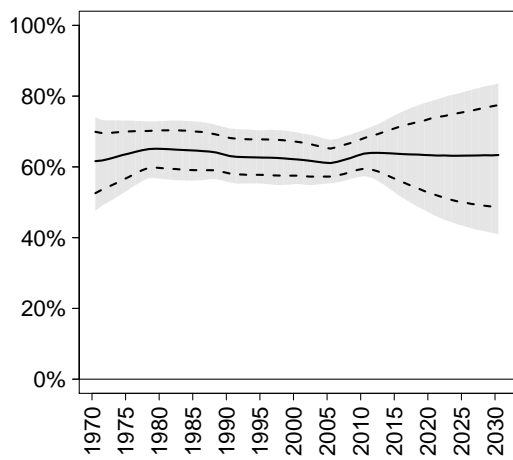

**CP (modern)**

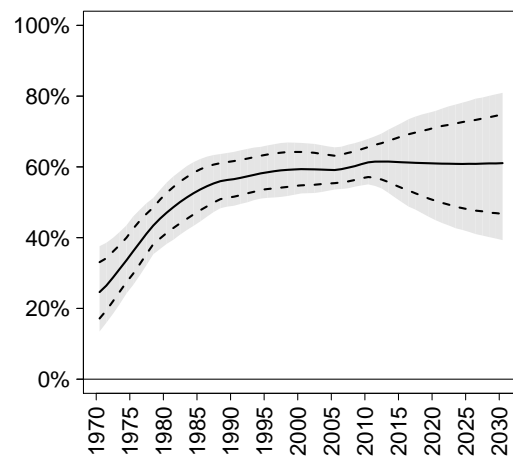

**CP (traditional)**

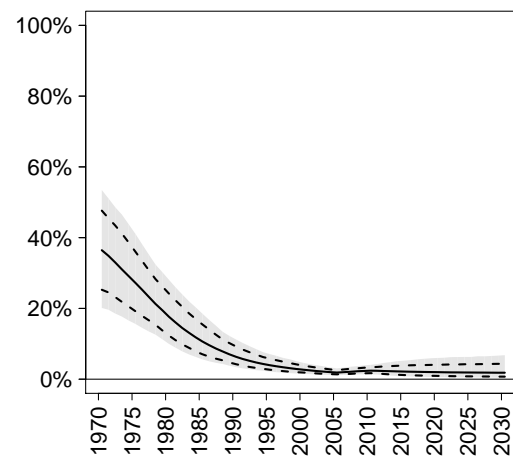

**Unmet need among all unmarried women**

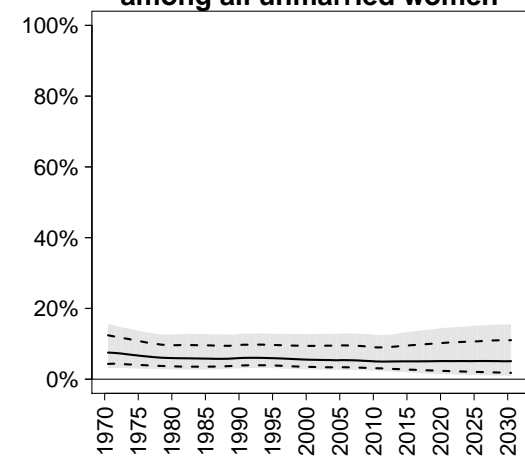

**Total demand**

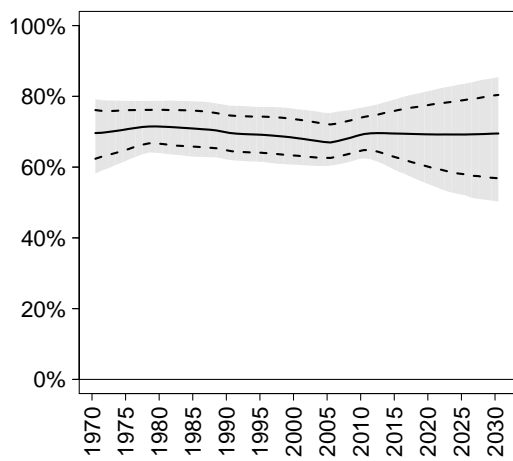

Gabon --- All women

**CP (any)**

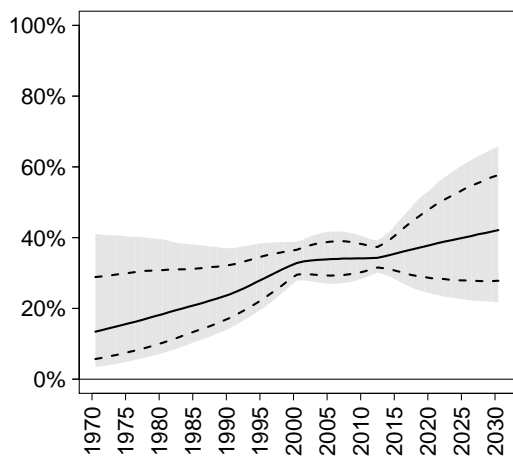

**CP (modern)**

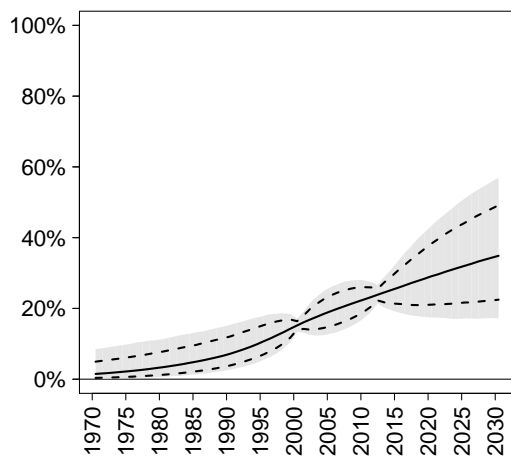

**CP (traditional)**

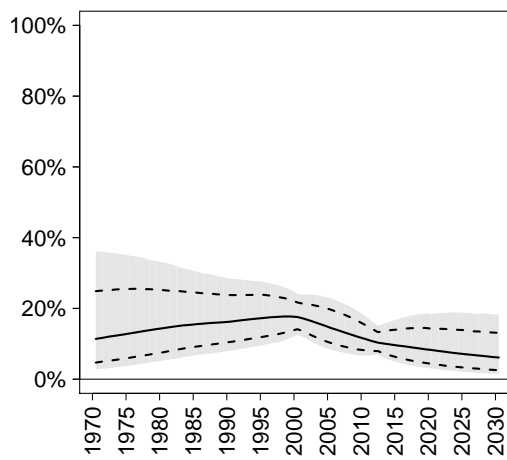

**Unmet need among all unmarried women**

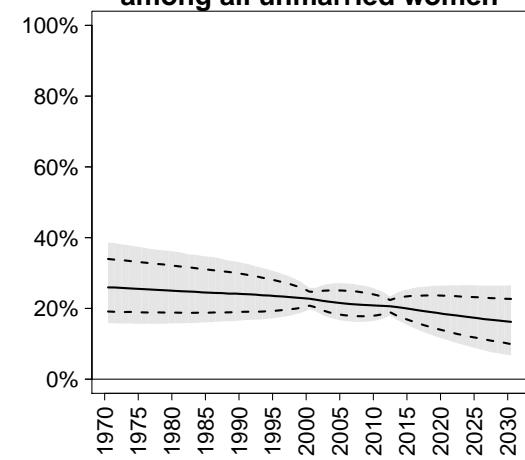

**Total demand**

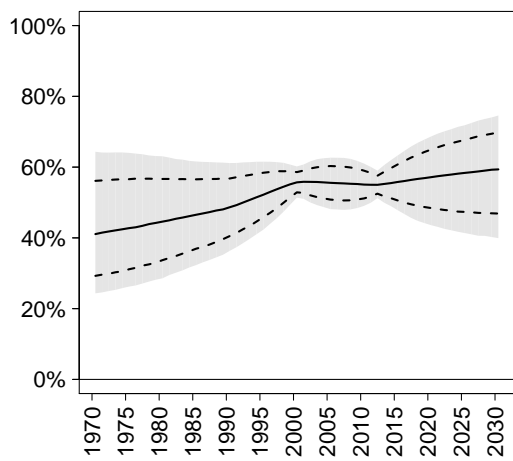

**Demand satisfied (any method)**

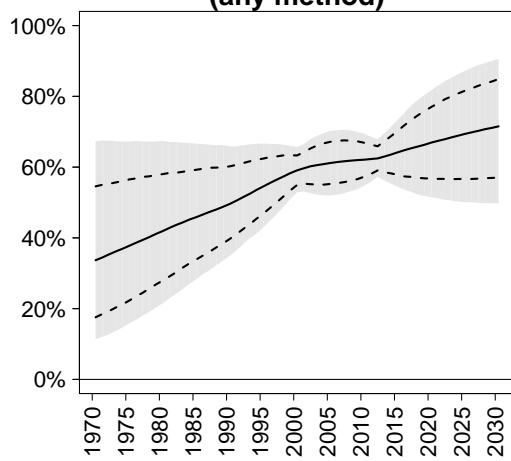

**Demand satisfied (modern methods)**

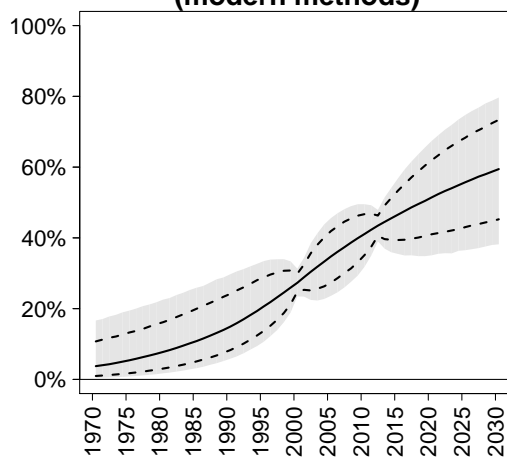

Gambia --- All women

**CP (any)**

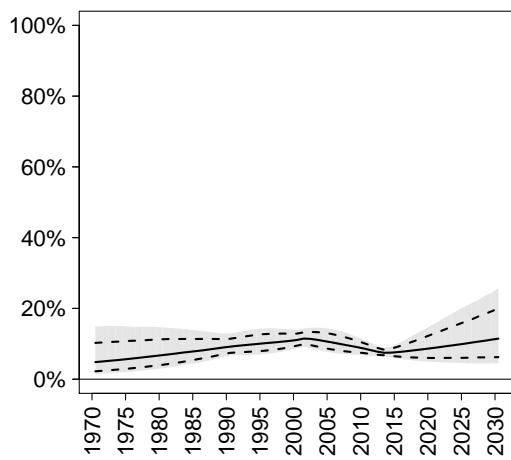

**CP (modern)**

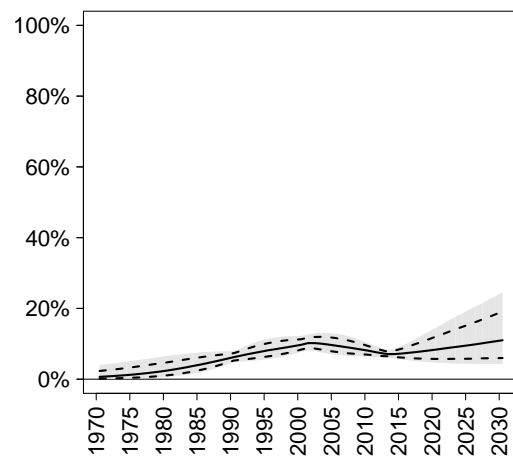

**CP (traditional)**

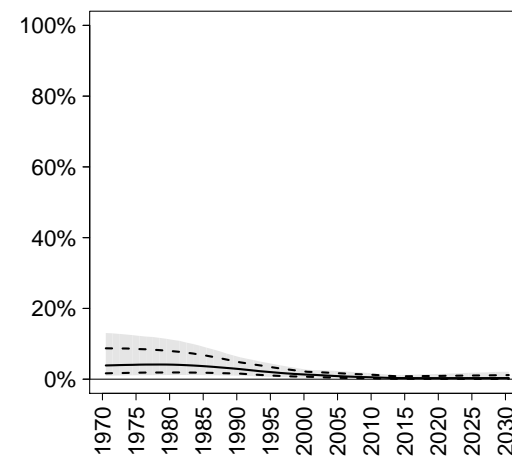

**Unmet need among all unmarried women**

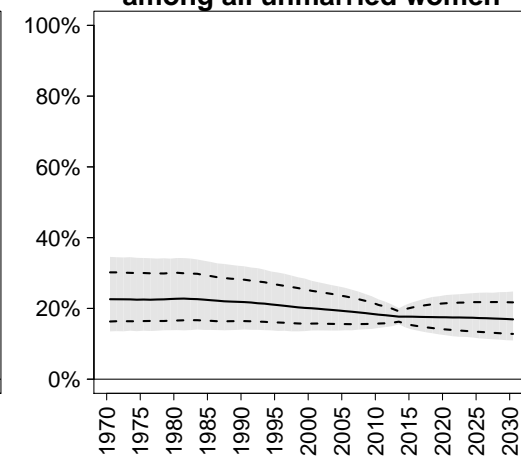

**Total demand**

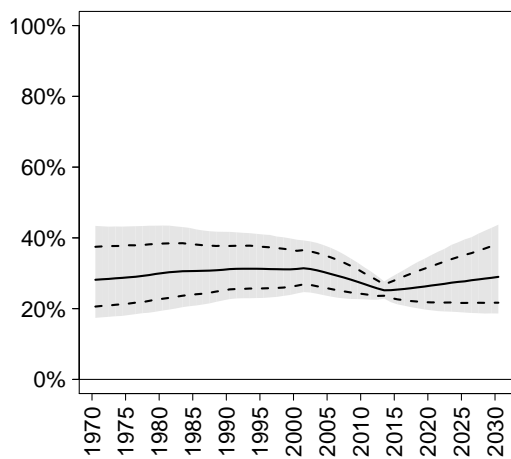

**Demand satisfied (any method)**

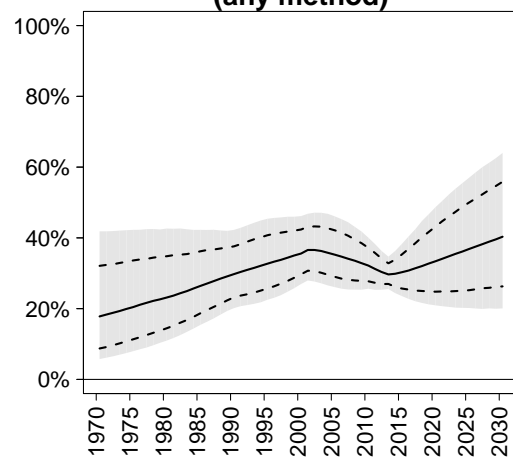

**Demand satisfied (modern methods)**

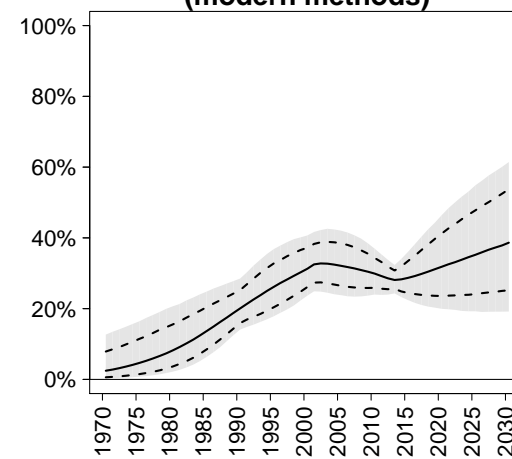

Georgia --- All women

**CP (any)**

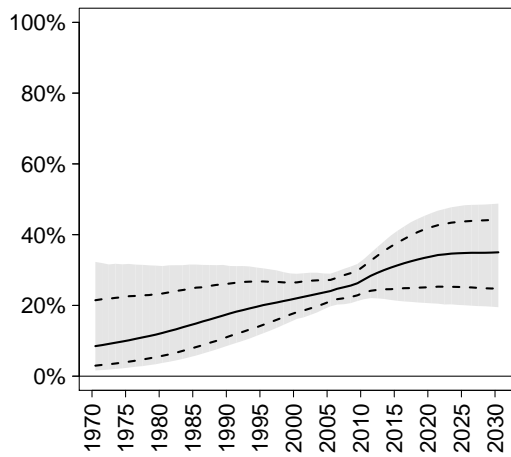

**CP (modern)**

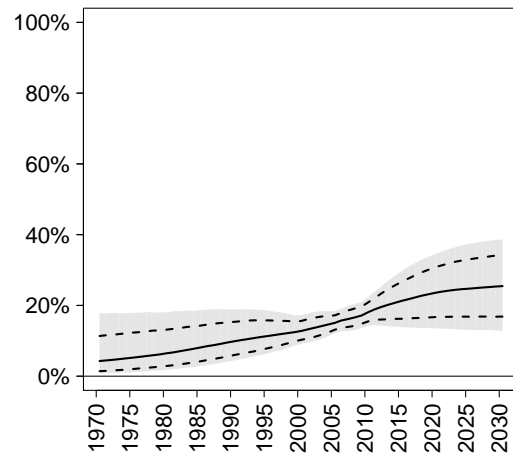

**CP (traditional)**

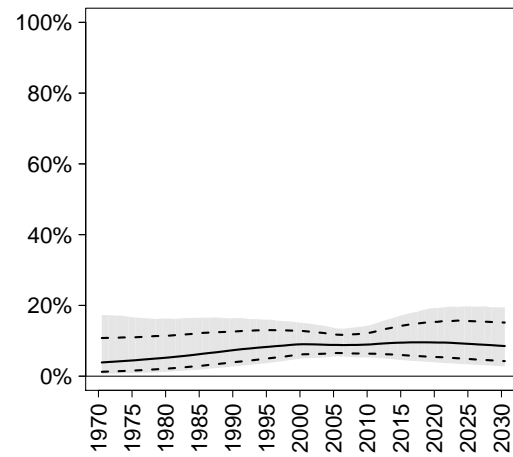

**Unmet need among all unmarried women**

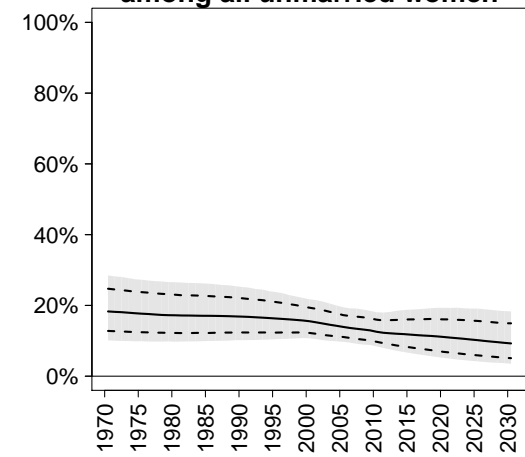

**Total demand**

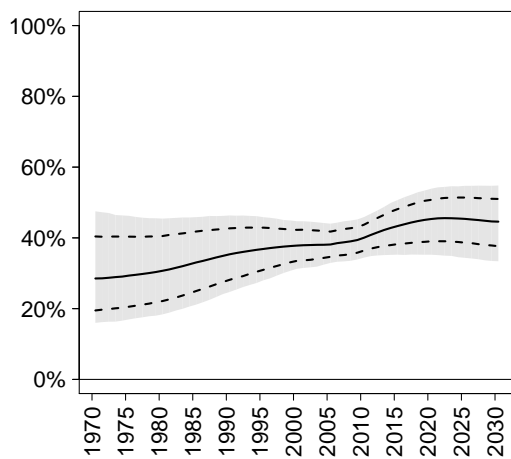

**Demand satisfied (any method)**

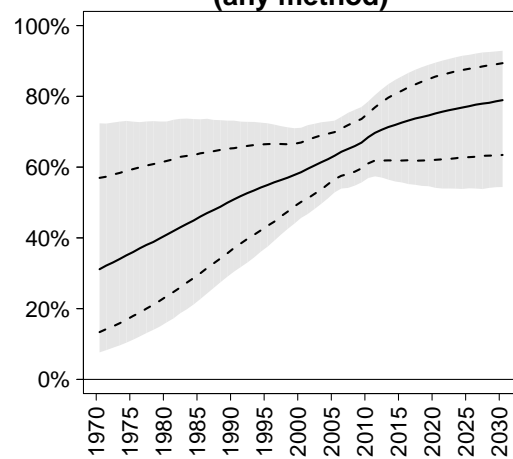

**Demand satisfied (modern methods)**

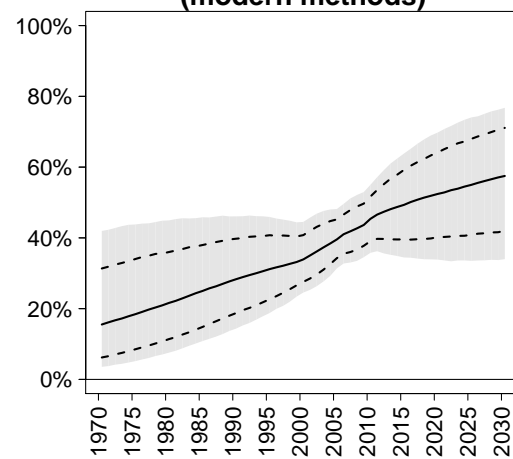



Germany --- All women

**CP (any)**

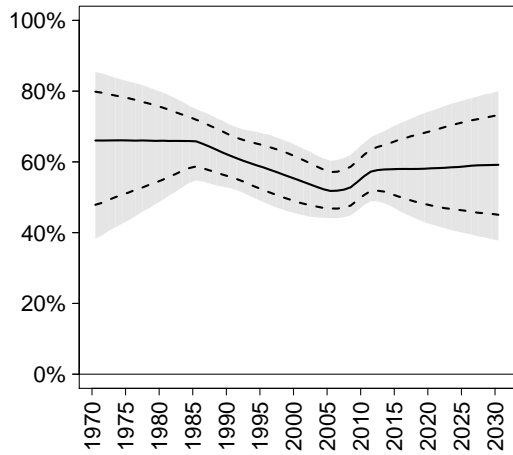

**CP (modern)**

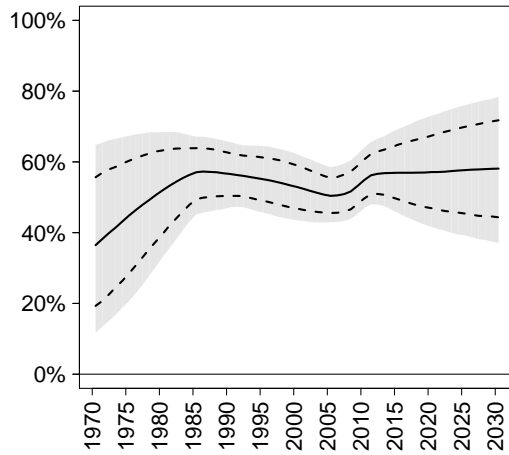

**CP (traditional)**

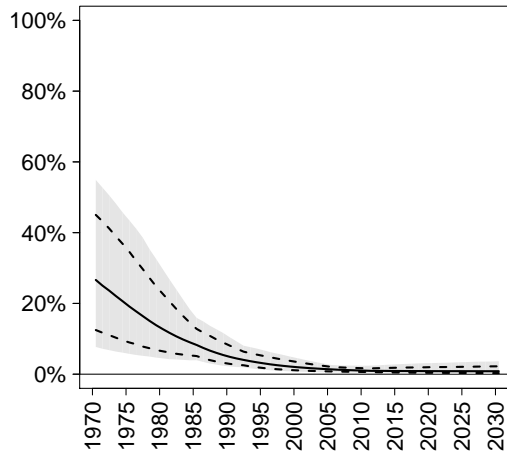

**Unmet need among all unmarried women**

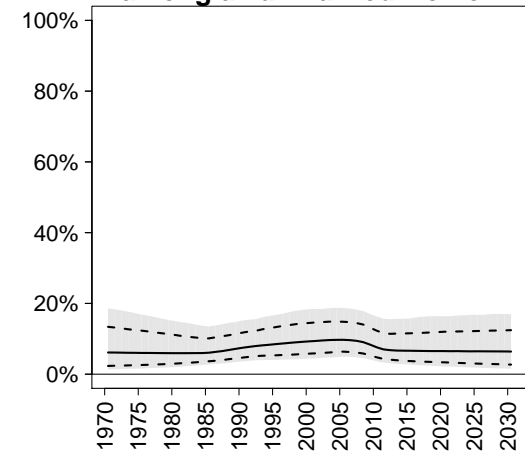

**Total demand**

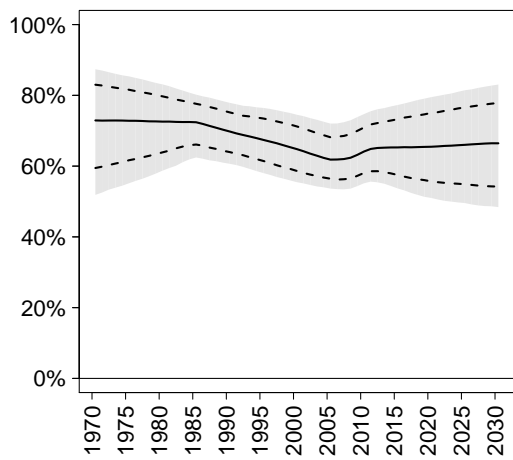

**Demand satisfied (any method)**

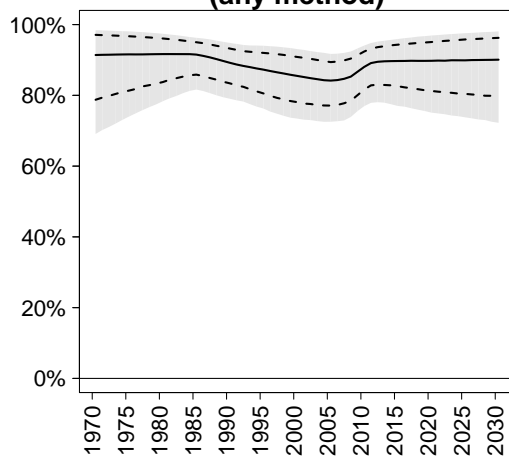

**Demand satisfied (modern methods)**

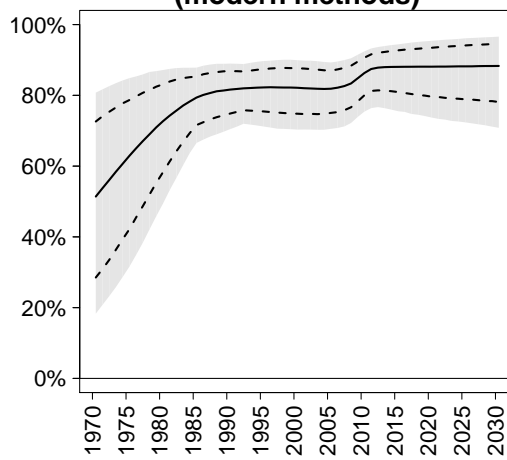

Ghana --- All women

**CP (any)**

**CP (modern)**

**CP (traditional)**

**Unmet need  
among all unmarried women**

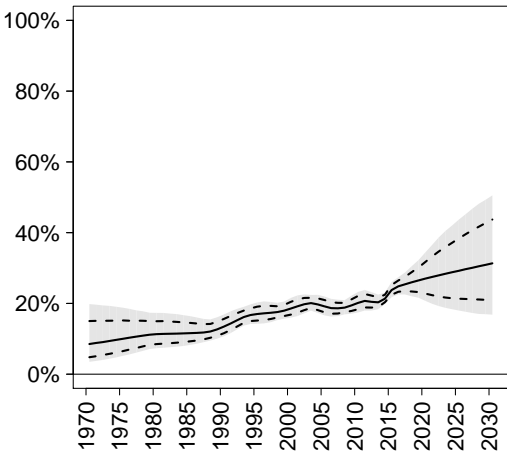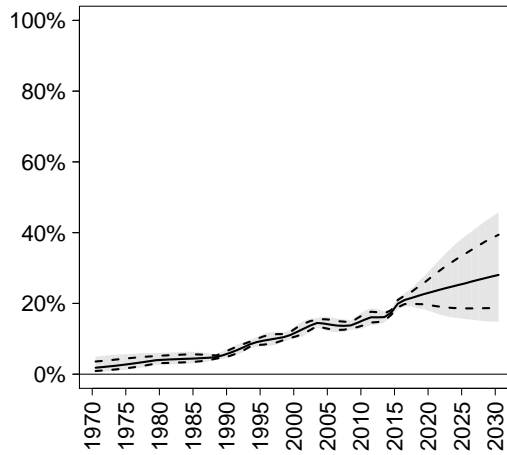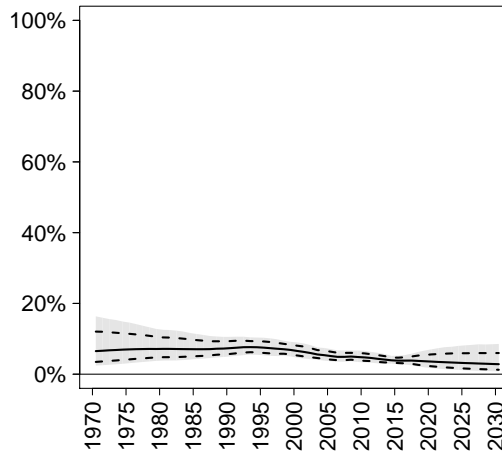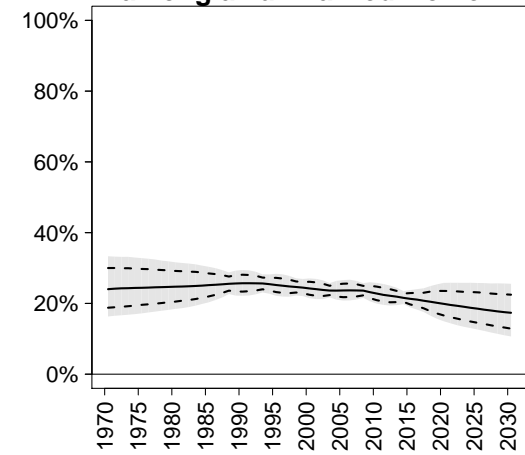

**Total demand**

**Demand satisfied  
(any method)**

**Demand satisfied  
(modern methods)**

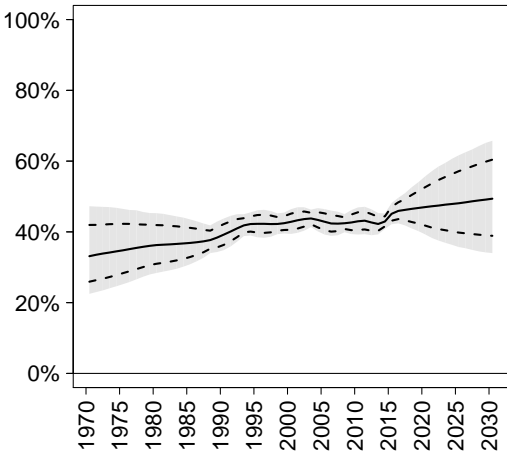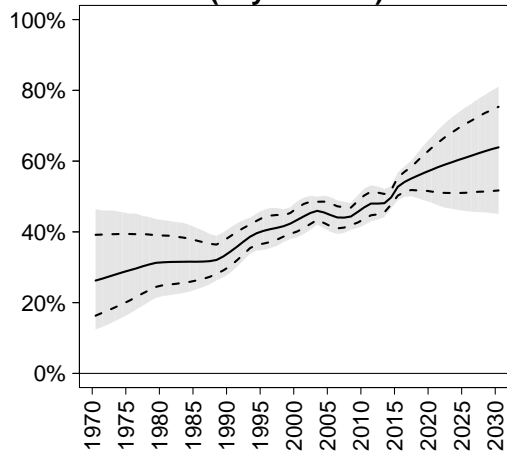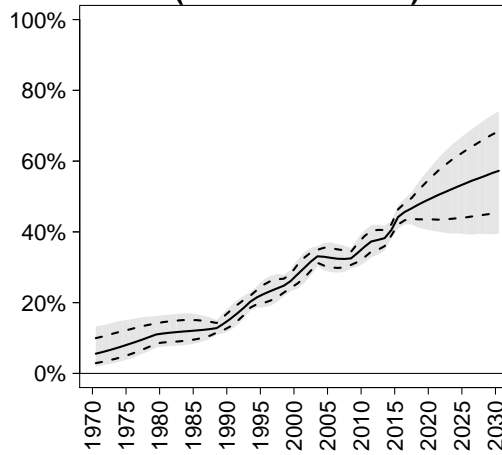

Greece --- All women

**CP (any)**

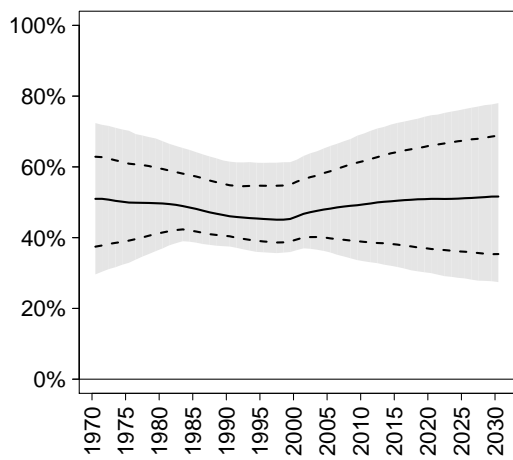

**CP (modern)**

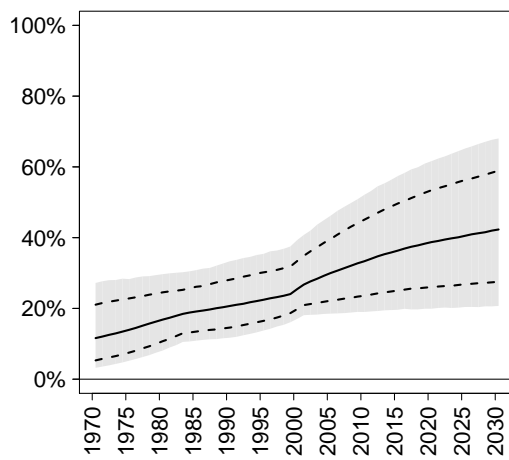

**CP (traditional)**

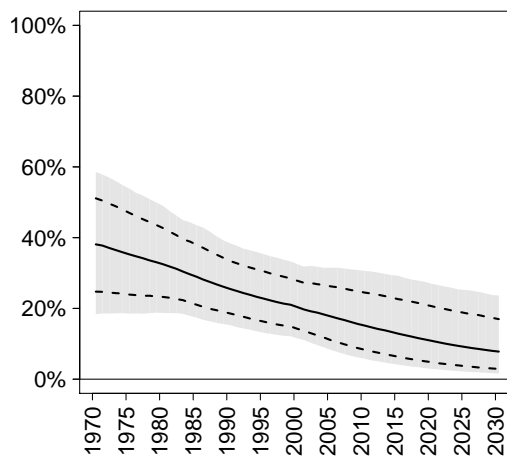

**Unmet need among all unmarried women**

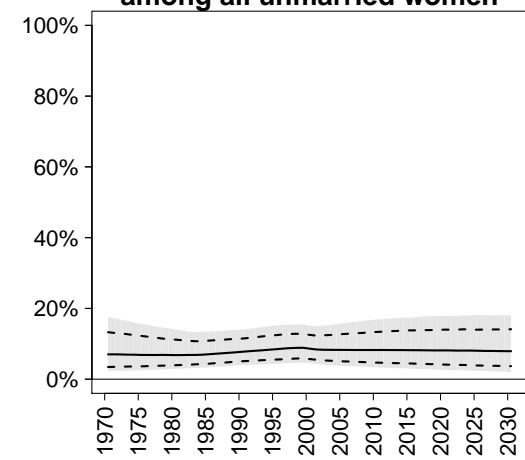

**Total demand**

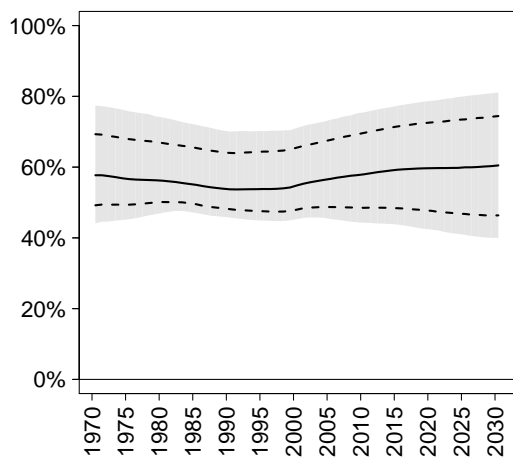

**Demand satisfied (any method)**

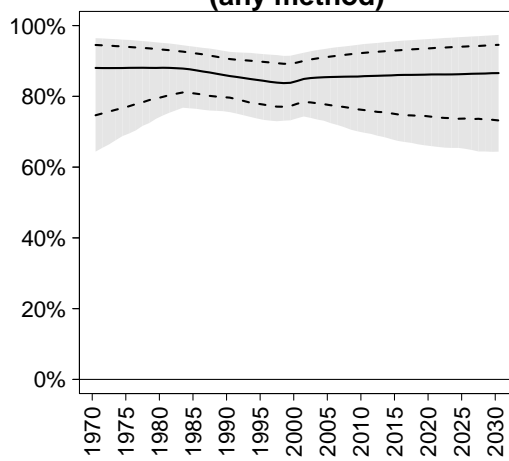

**Demand satisfied (modern methods)**

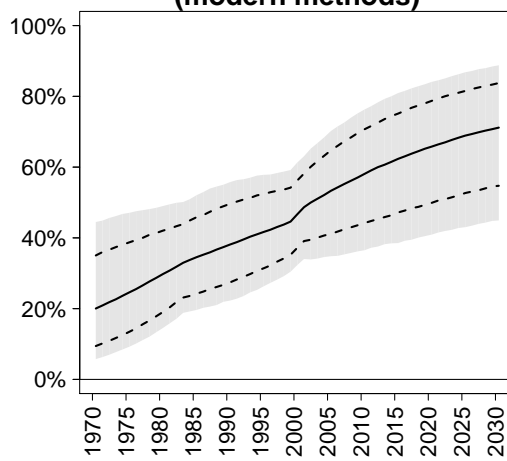

Grenada --- All women

**CP (any)**

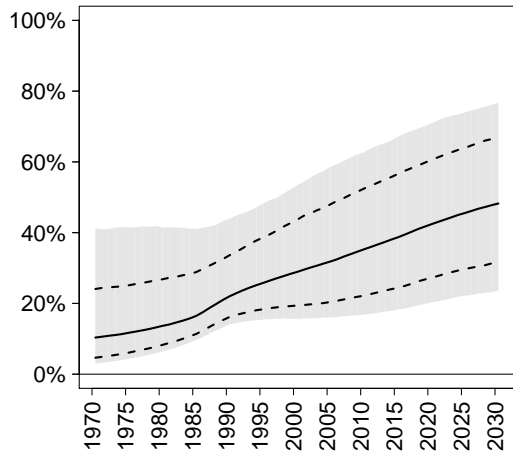

**CP (modern)**

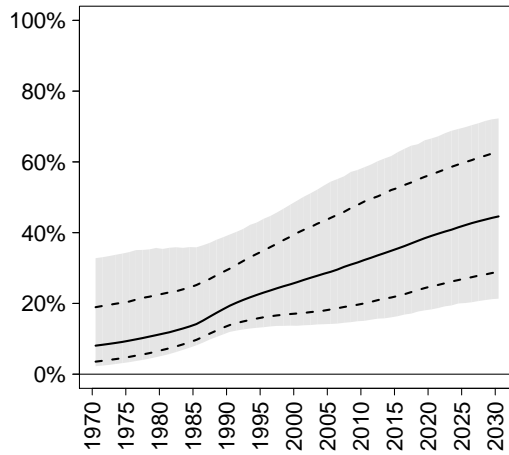

**CP (traditional)**

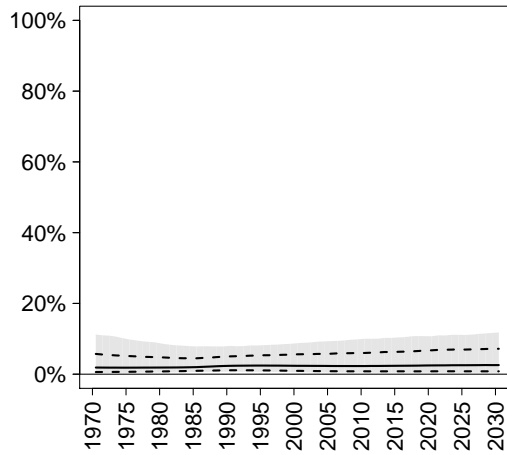

**Unmet need among all unmarried women**

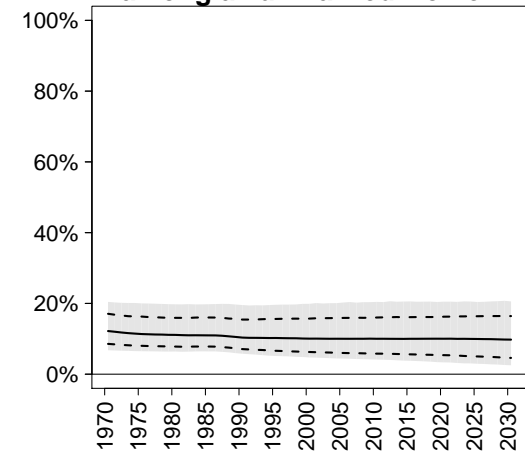

**Total demand**

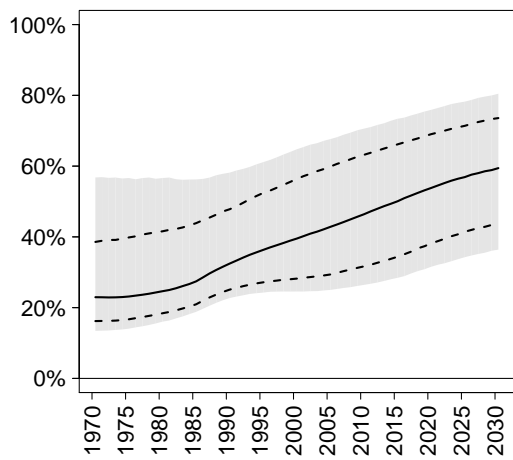

**Demand satisfied (any method)**

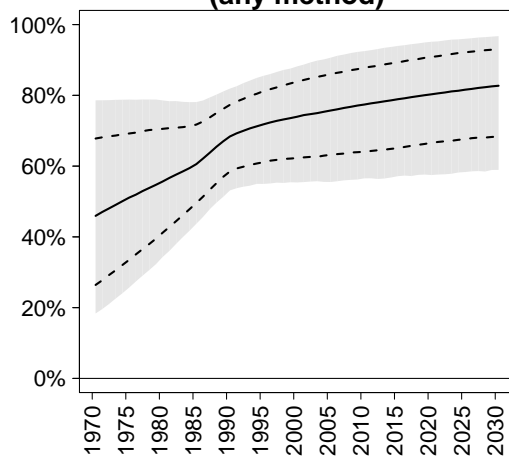

**Demand satisfied (modern methods)**

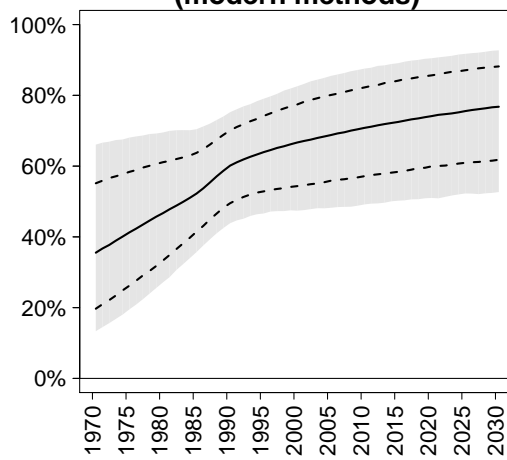

Guadeloupe --- All women

**CP (any)**

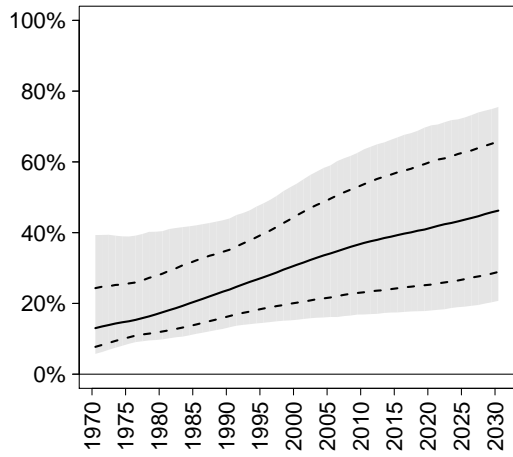

**CP (modern)**

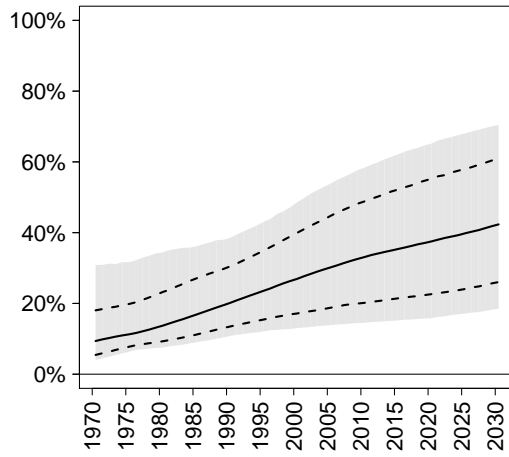

**CP (traditional)**

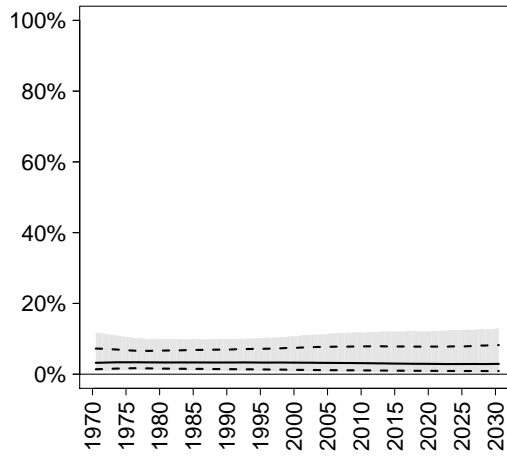

**Unmet need among all unmarried women**

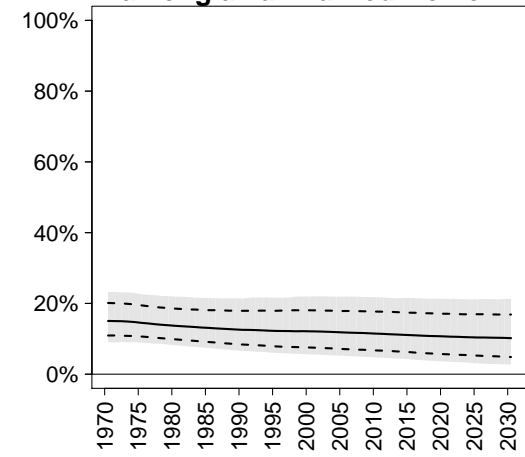

**Total demand**

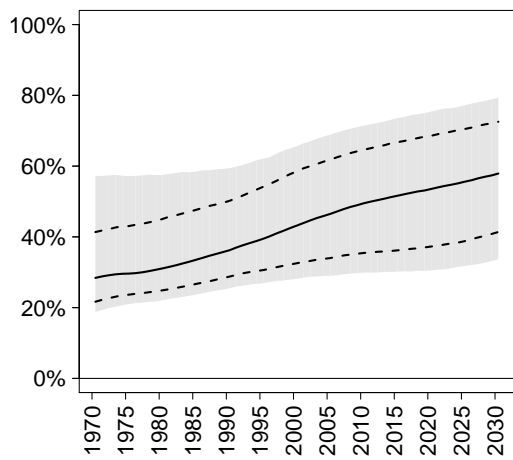

**Demand satisfied (any method)**

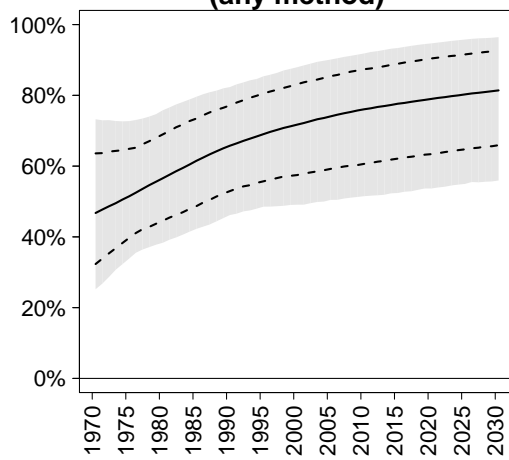

**Demand satisfied (modern methods)**

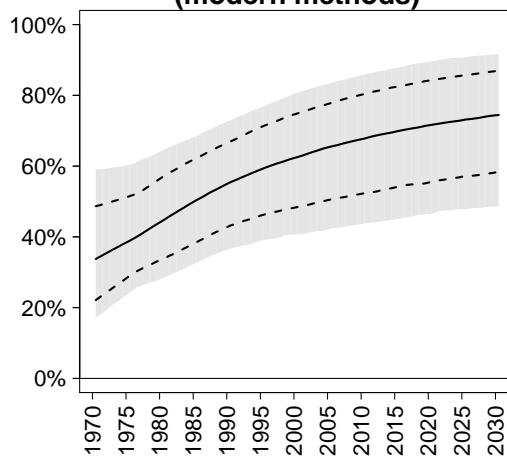

Guam --- All women

**CP (any)**

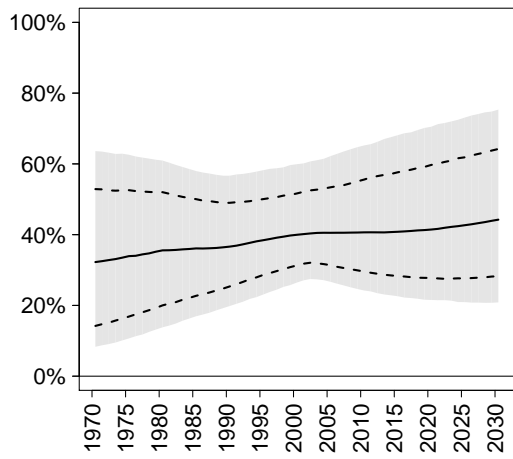

**CP (modern)**

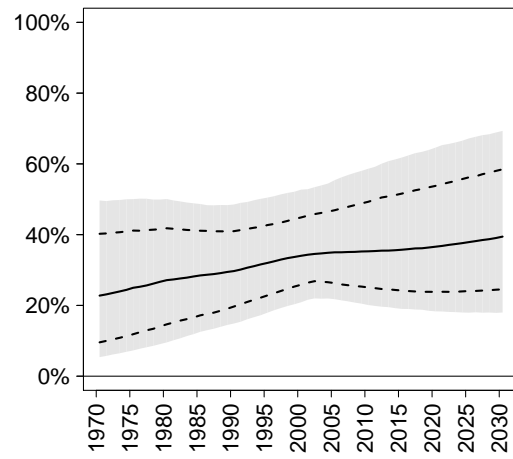

**CP (traditional)**

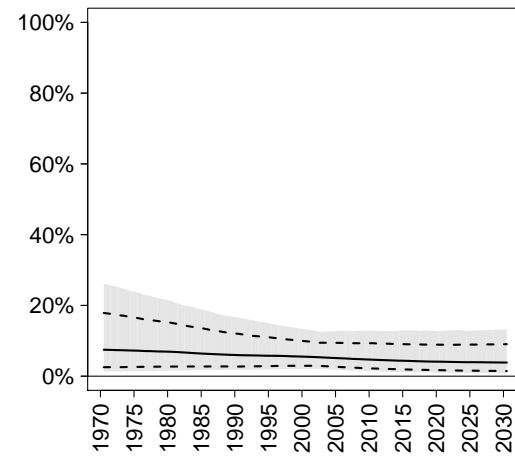

**Unmet need among all unmarried women**

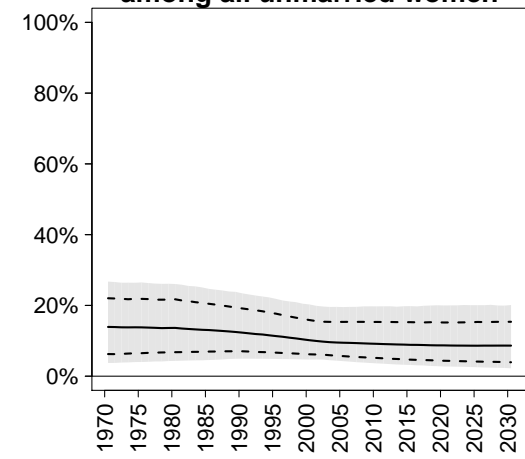

**Total demand**

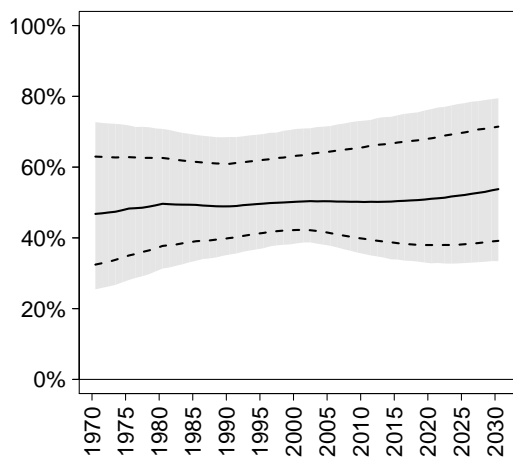

Guatemala --- All women

**CP (any)**

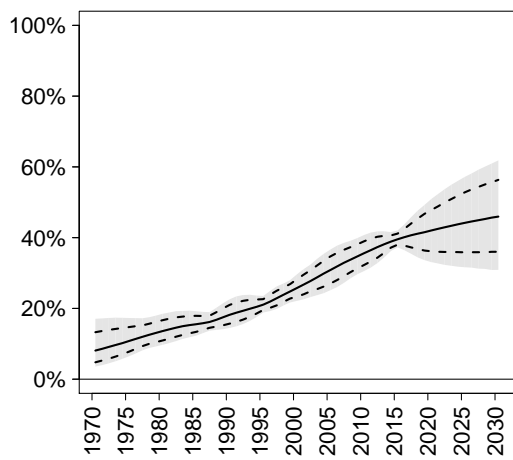

**CP (modern)**

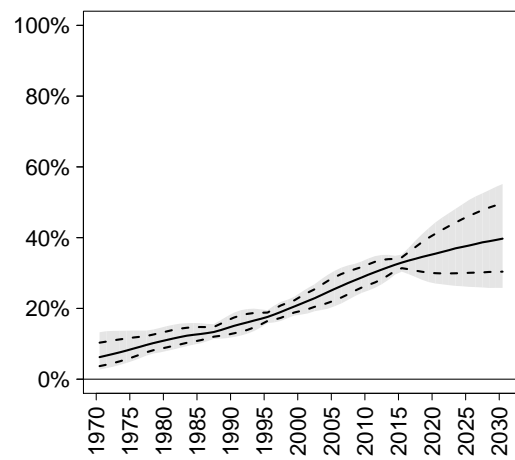

**CP (traditional)**

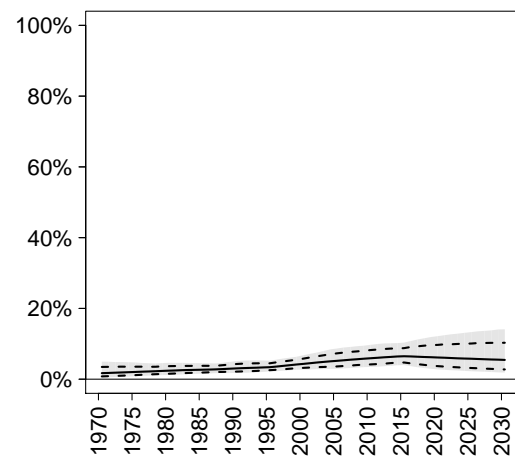

**Unmet need among all unmarried women**

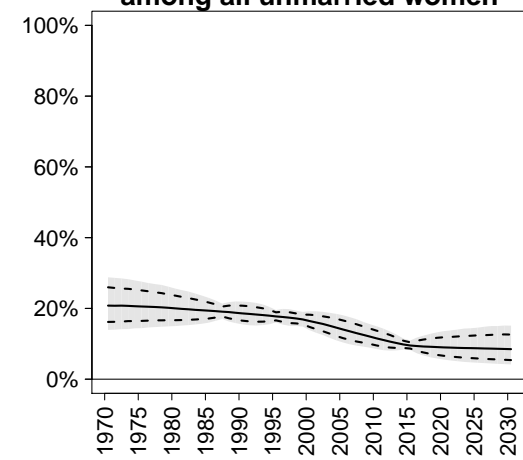

**Total demand**

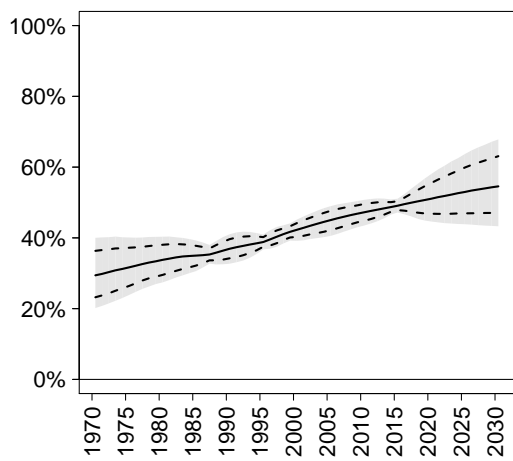

Guinea --- All women

**CP (any)**

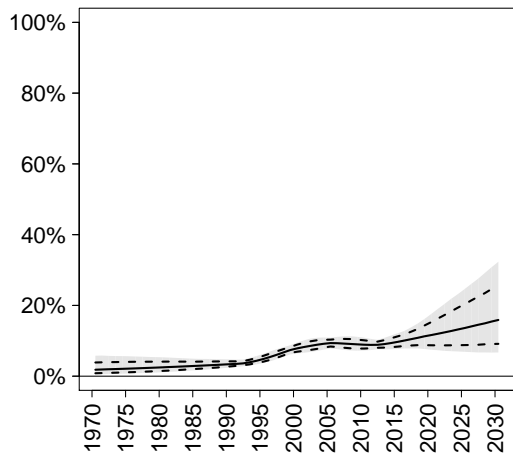

**CP (modern)**

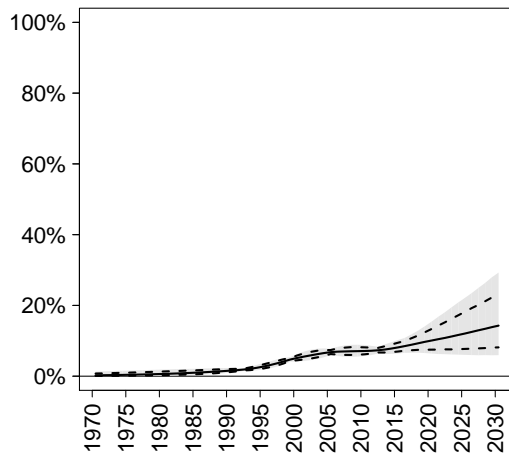

**CP (traditional)**

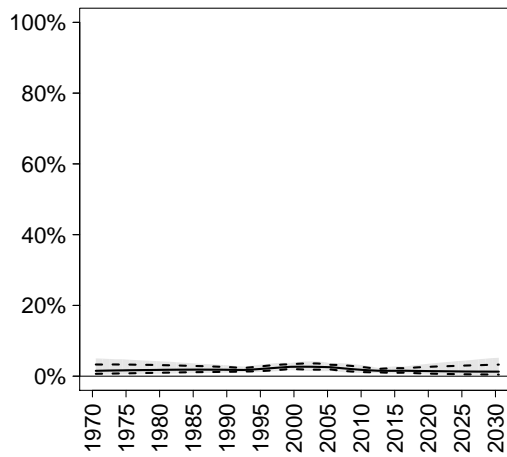

**Unmet need among all unmarried women**

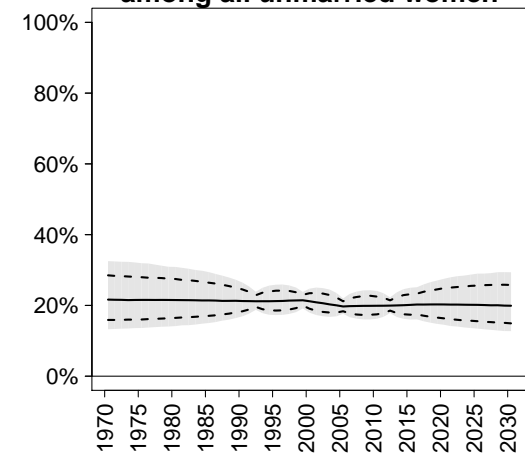

**Total demand**

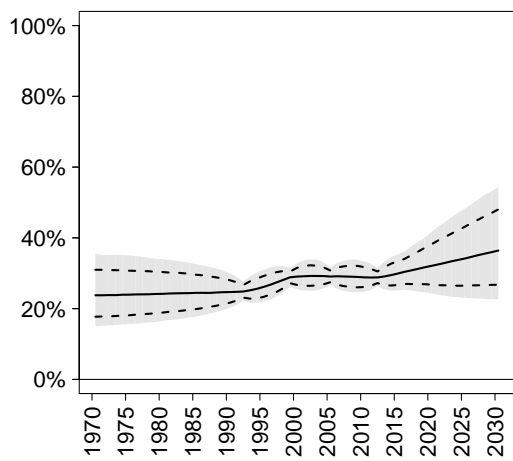

**Demand satisfied (any method)**

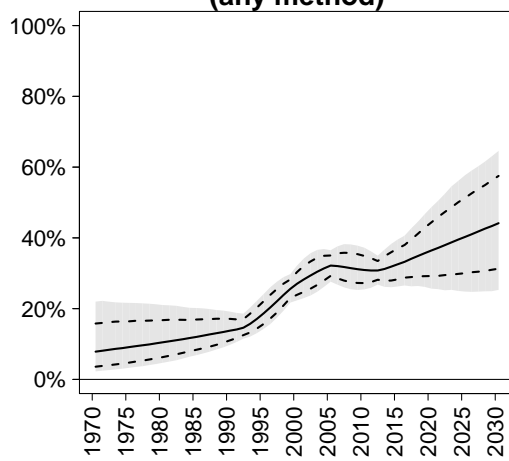

**Demand satisfied (modern methods)**

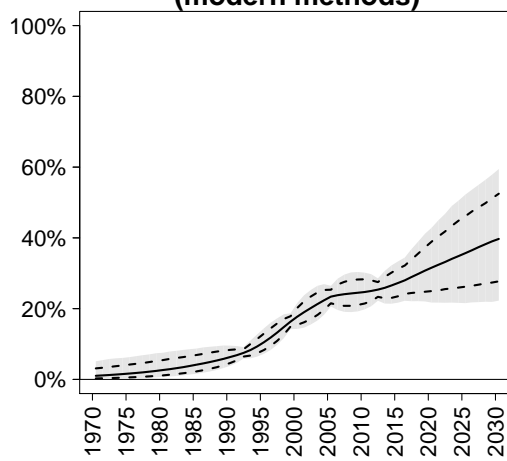



Guinea-Bissau --- All women

**CP (any)**

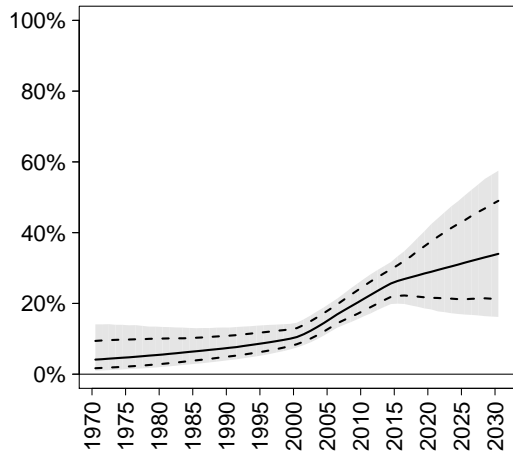

**CP (modern)**

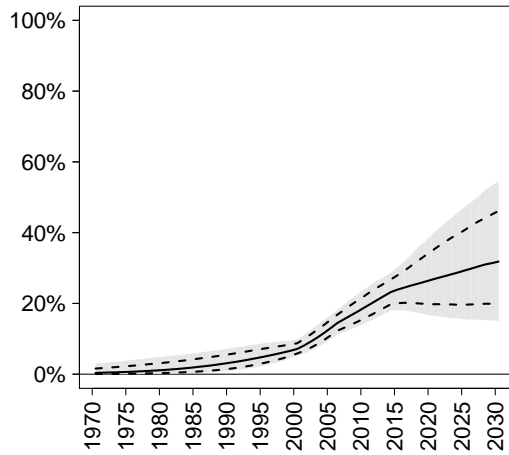

**CP (traditional)**

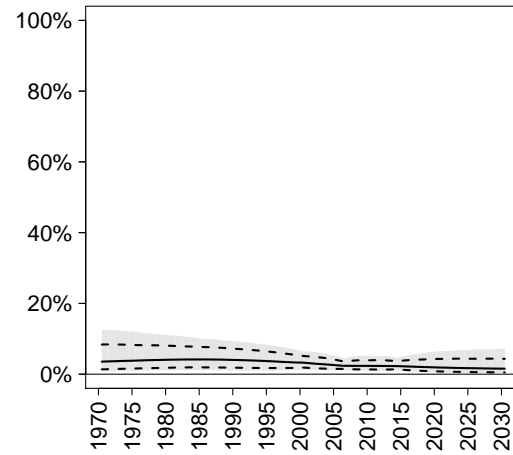

**Unmet need among all unmarried women**

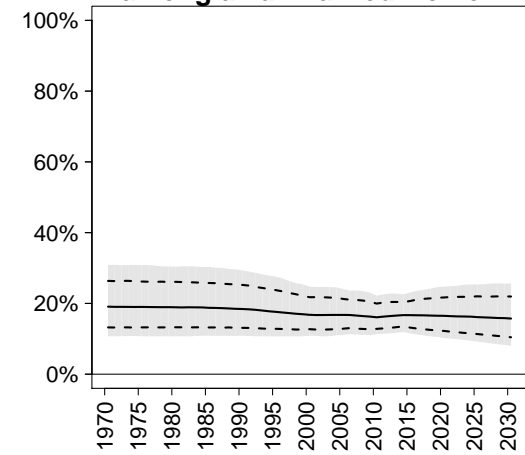

**Total demand**

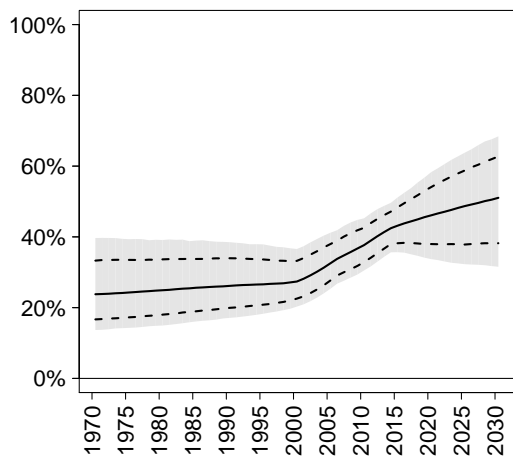

**Demand satisfied (any method)**

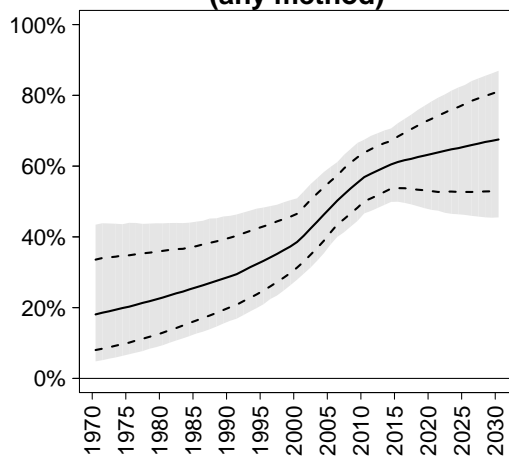

**Demand satisfied (modern methods)**

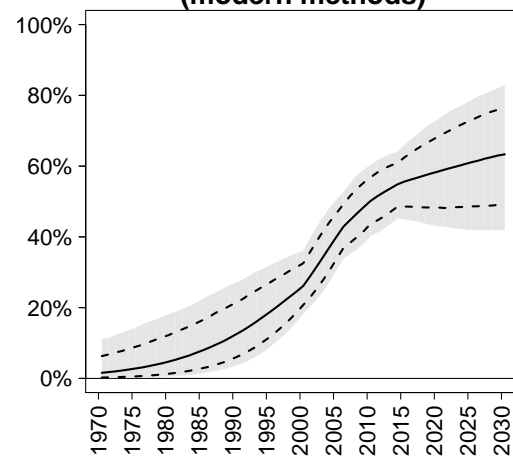

Guyana --- All women

**CP (any)**

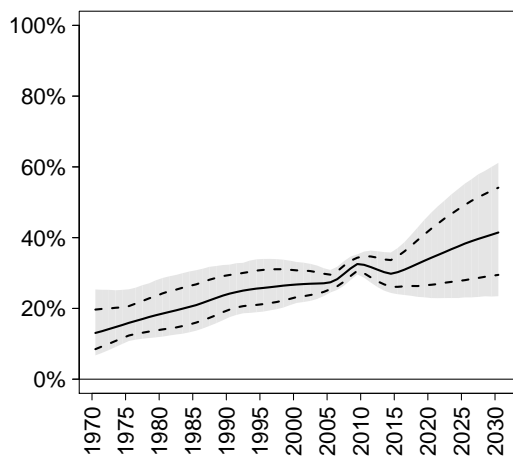

**CP (modern)**

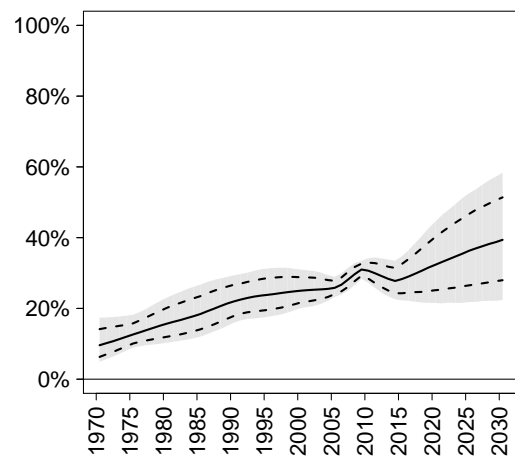

**CP (traditional)**

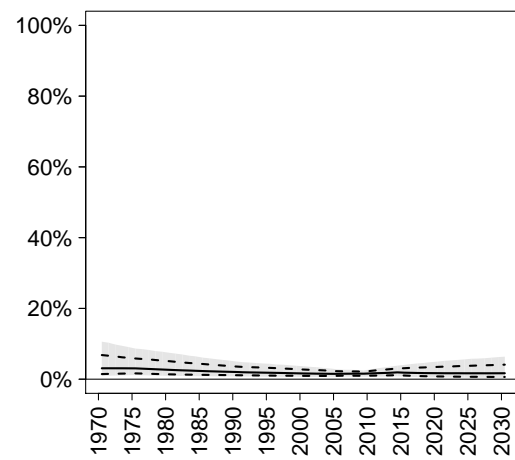

**Unmet need among all unmarried women**

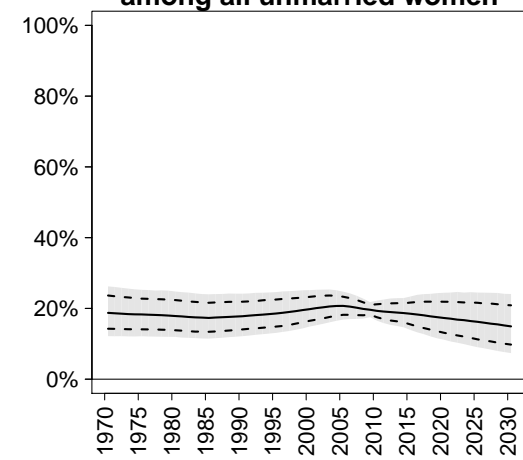

**Total demand**

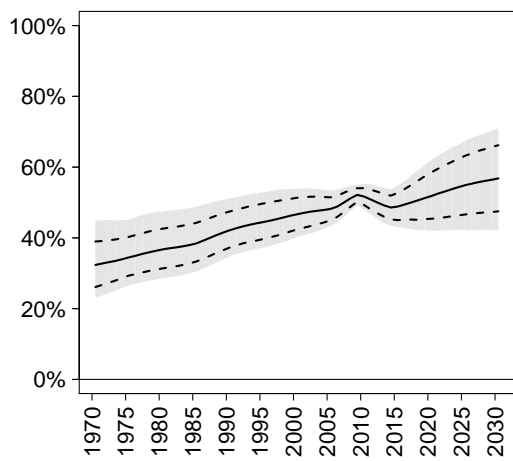

**Demand satisfied (any method)**

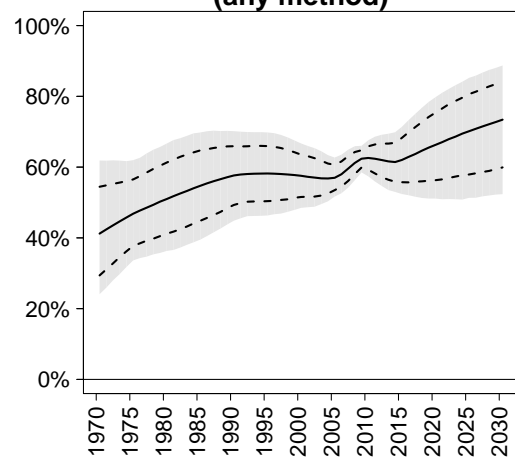

**Demand satisfied (modern methods)**

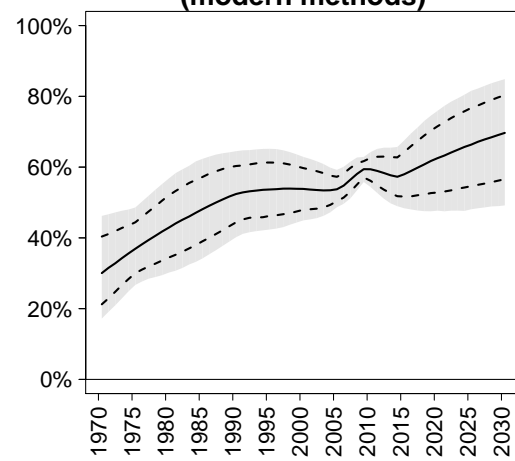

Haiti --- All women

**CP (any)**

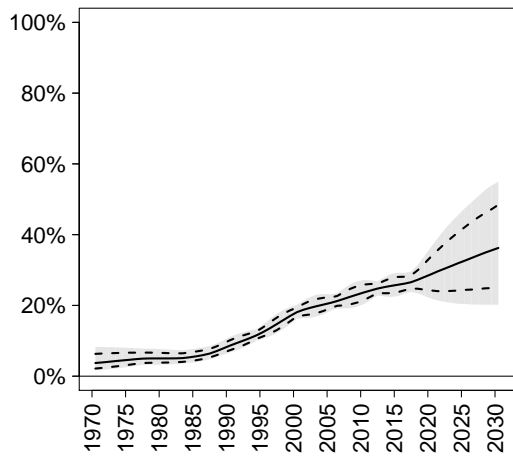

**CP (modern)**

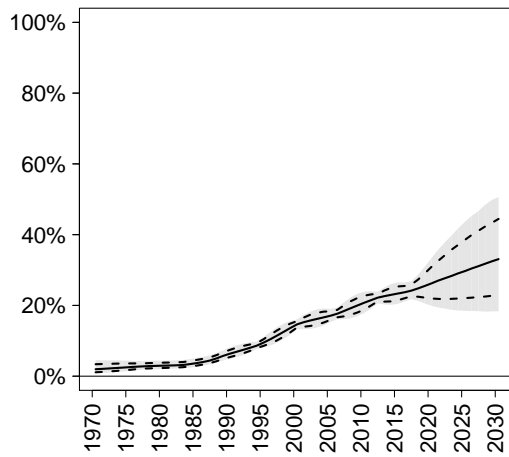

**CP (traditional)**

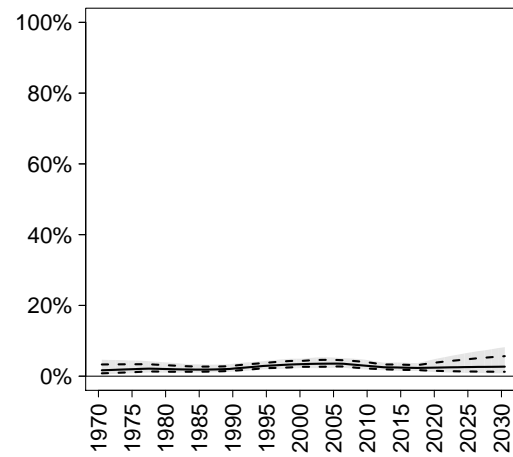

**Unmet need among all unmarried women**

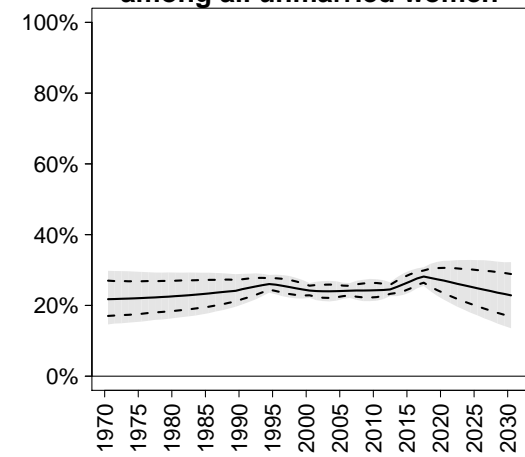

**Total demand**

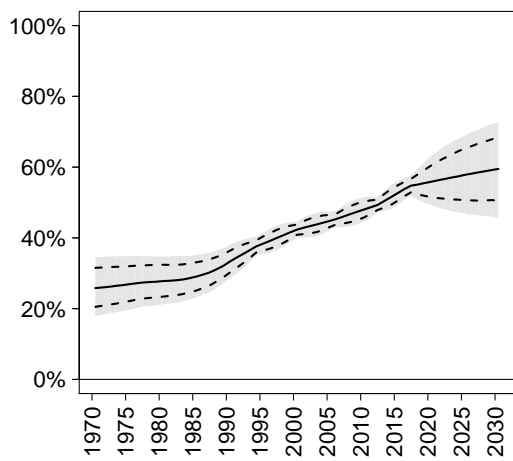

**Demand satisfied (any method)**

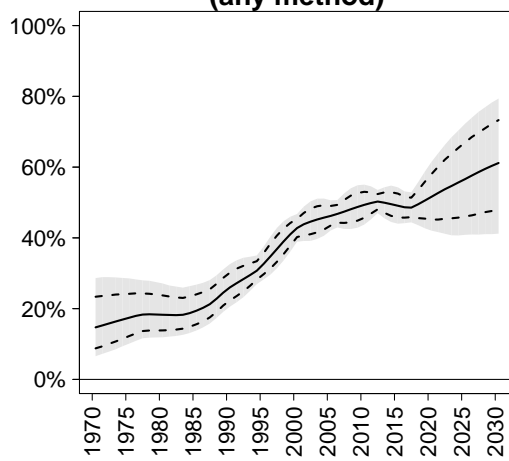

**Demand satisfied (modern methods)**

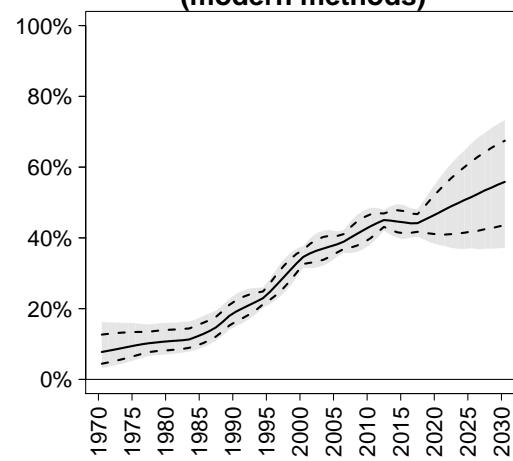

Honduras --- All women

**CP (any)**

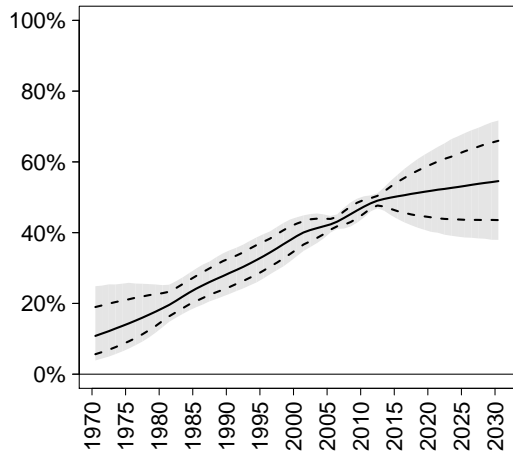

**CP (modern)**

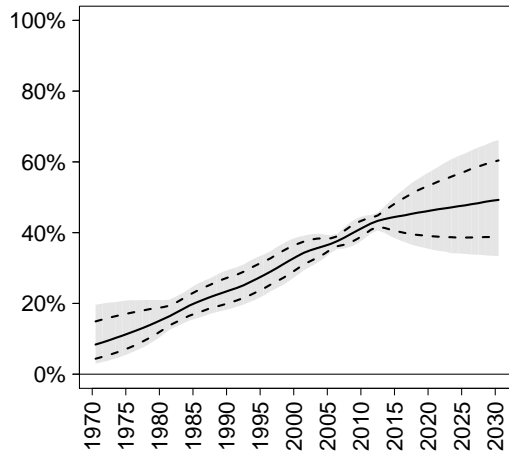

**CP (traditional)**

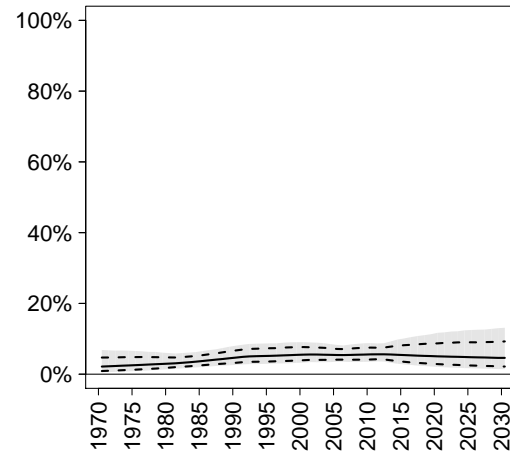

**Unmet need among all unmarried women**

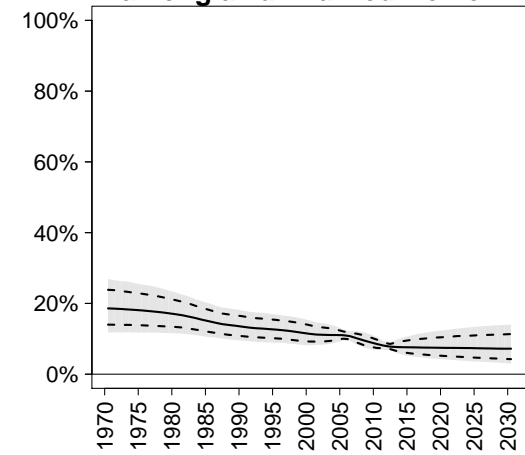

**Total demand**

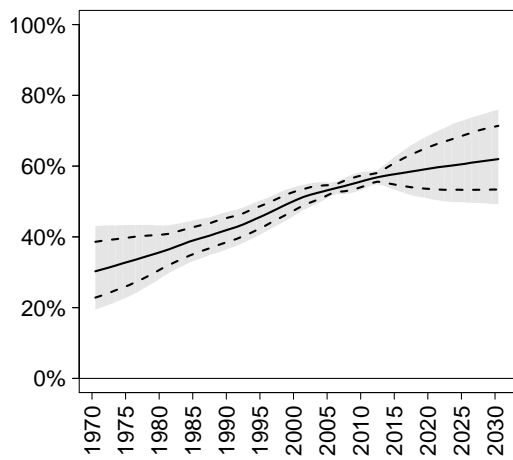

**Demand satisfied (any method)**

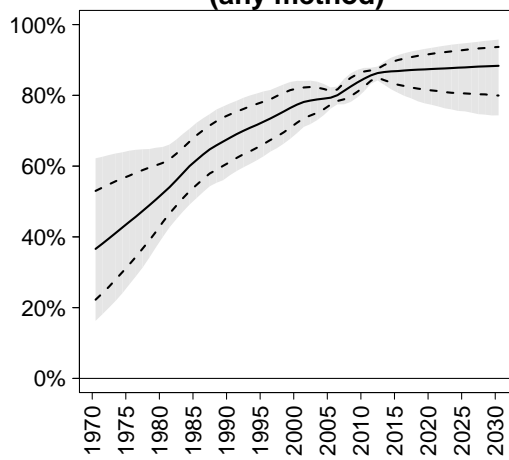

**Demand satisfied (modern methods)**

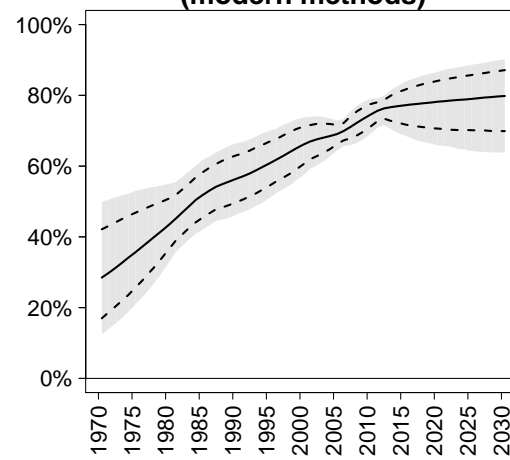

Hungary --- All women

**CP (any)**

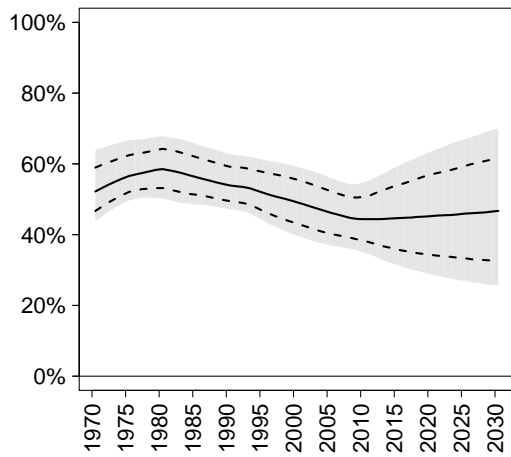

**CP (modern)**

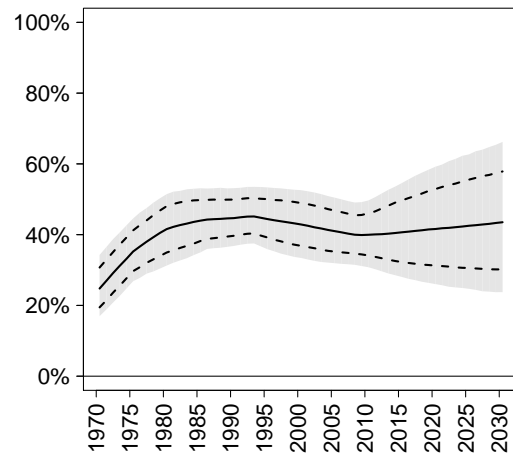

**CP (traditional)**

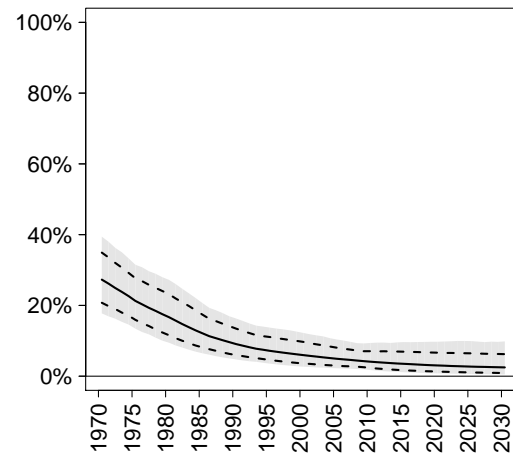

**Unmet need among all unmarried women**

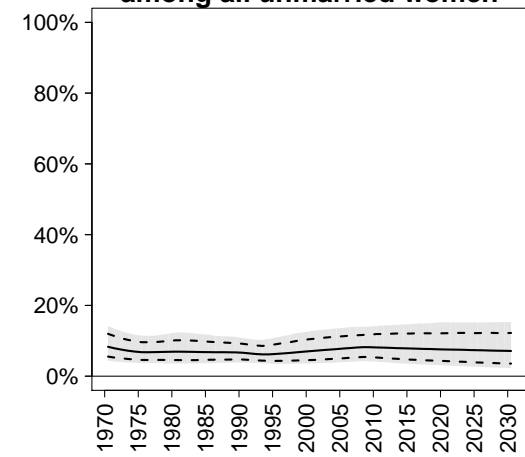

**Total demand**

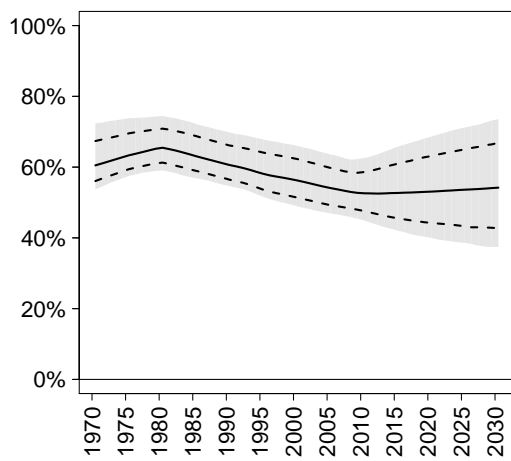

**Demand satisfied (any method)**

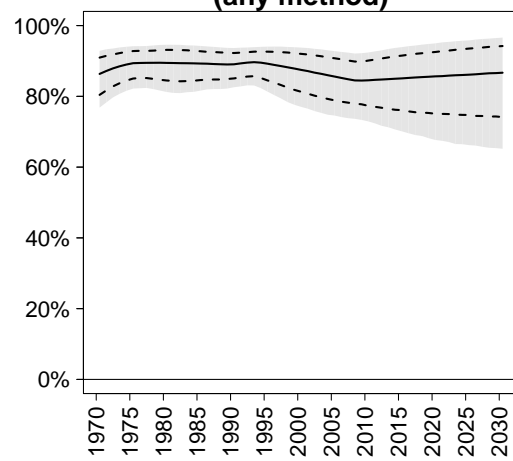

**Demand satisfied (modern methods)**

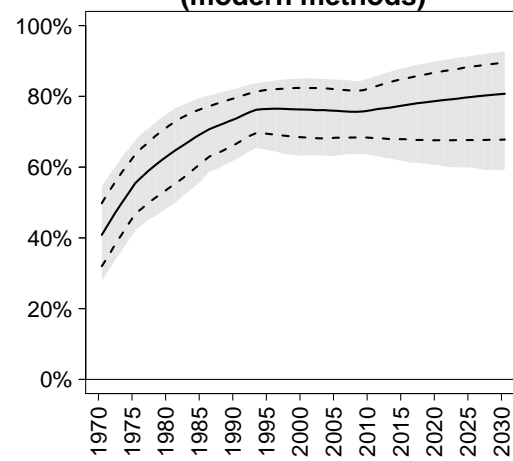

India --- All women

**CP (any)**

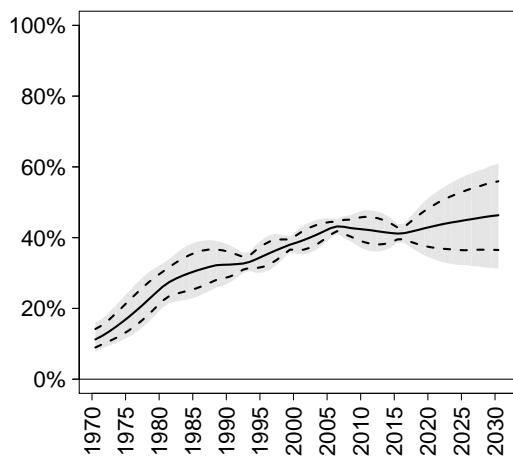

**CP (modern)**

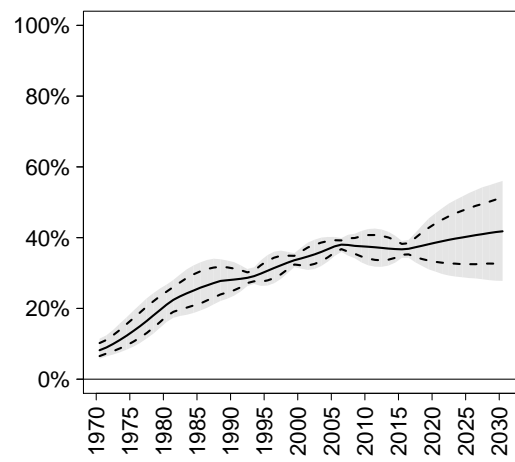

**CP (traditional)**

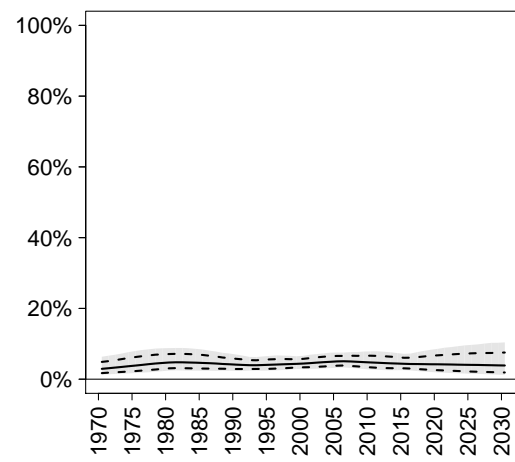

**Unmet need among all unmarried women**

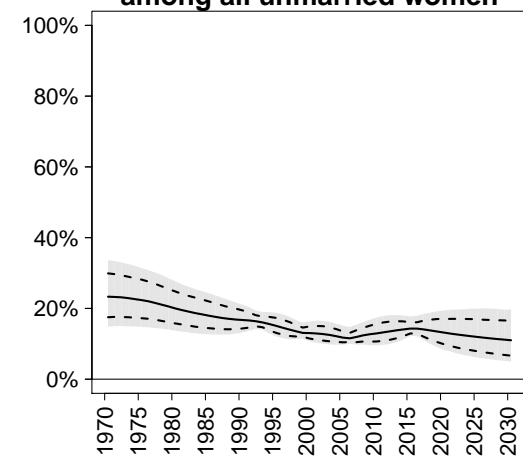

**Total demand**

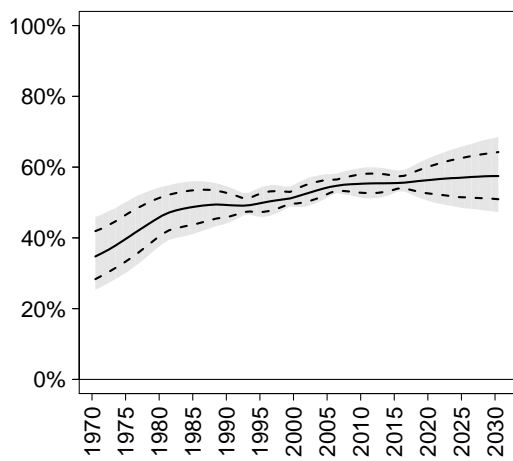

Indonesia --- All women

**CP (any)**

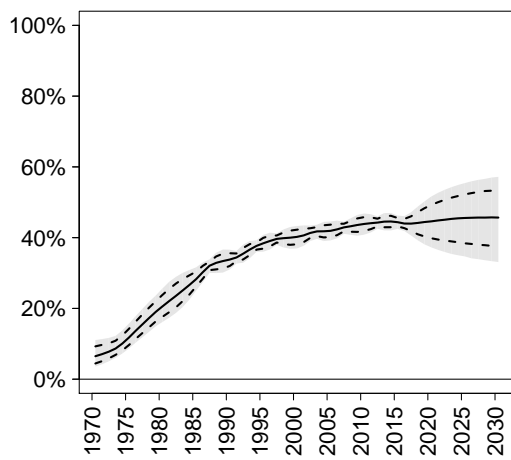

**CP (modern)**

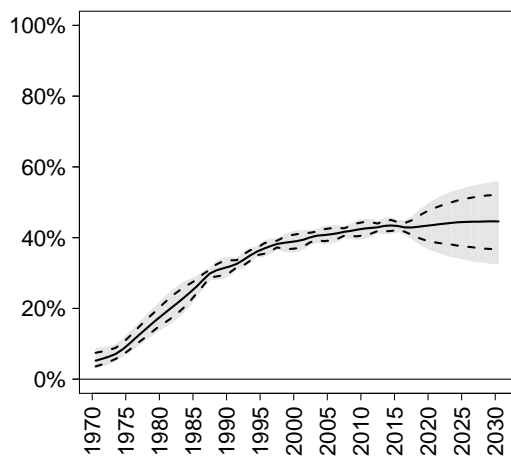

**CP (traditional)**

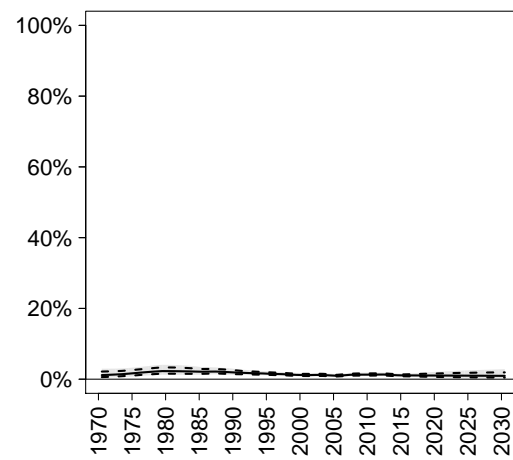

**Unmet need among all unmarried women**

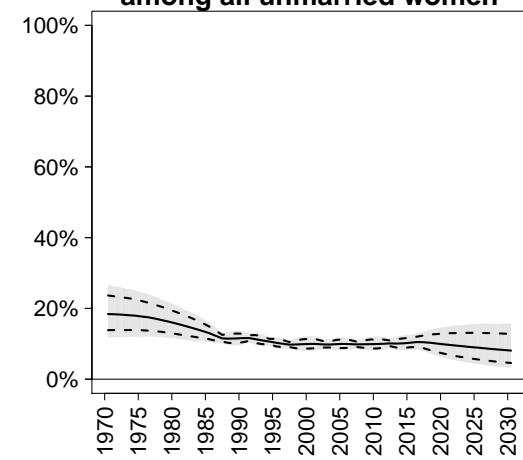

**Total demand**

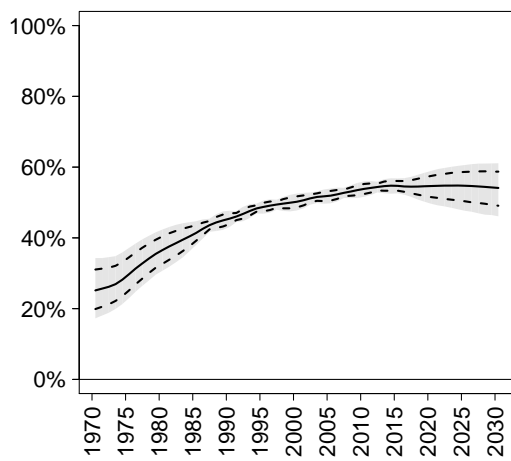

**Demand satisfied (any method)**

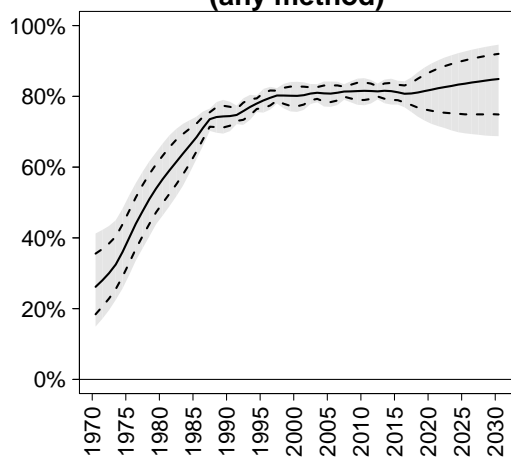

**Demand satisfied (modern methods)**

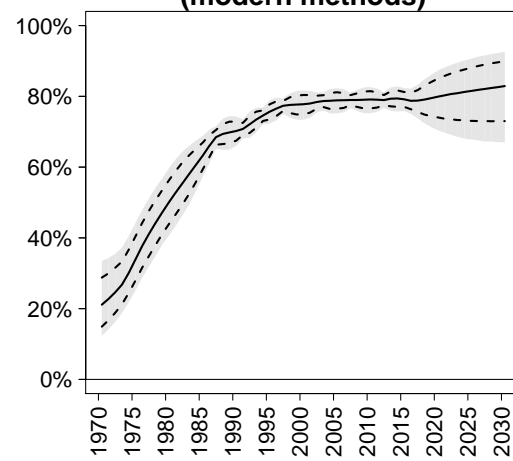

Iran (Islamic Republic of) --- All women

**CP (any)**

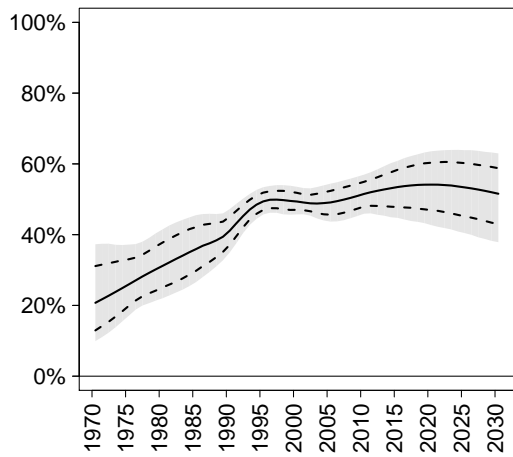

**CP (modern)**

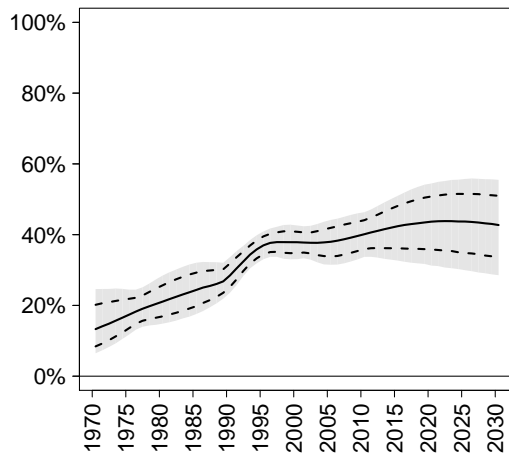

**CP (traditional)**

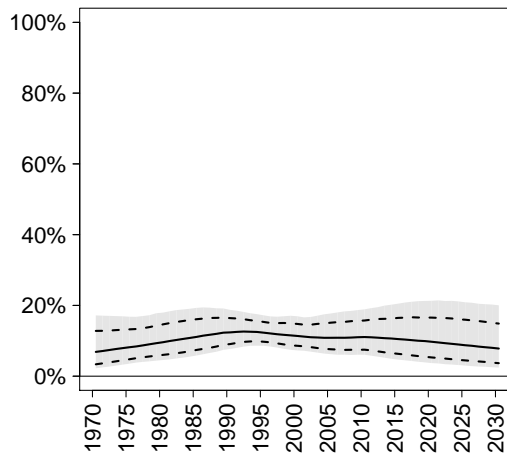

**Unmet need among all unmarried women**

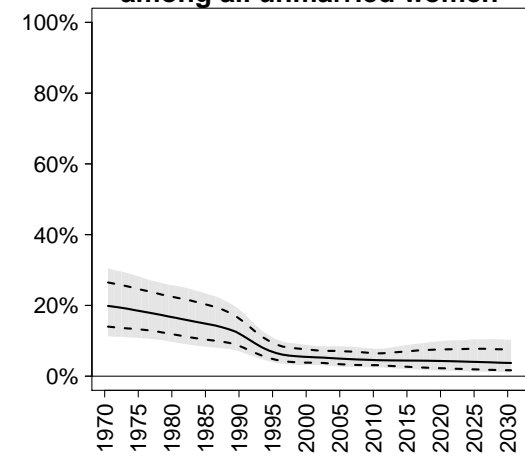

**Total demand**

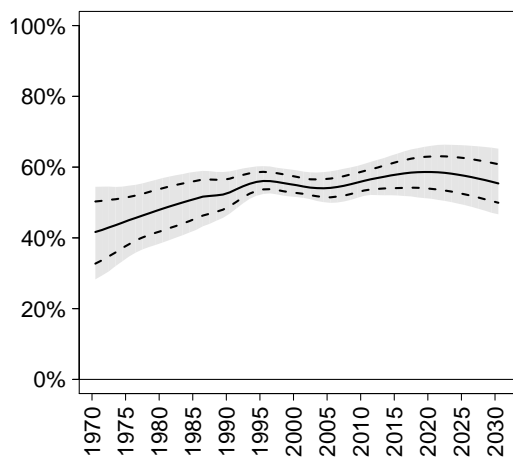

**Demand satisfied (any method)**

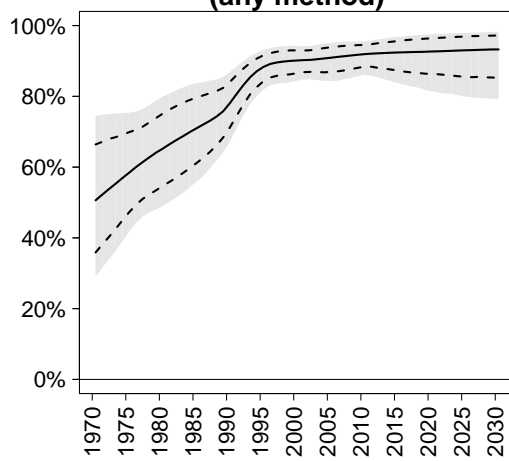

**Demand satisfied (modern methods)**

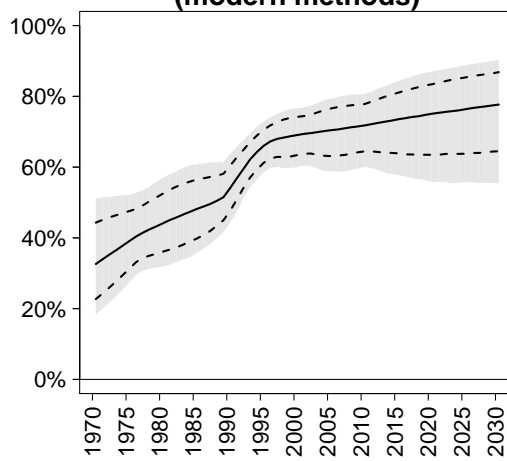



Iraq --- All women

**CP (any)**

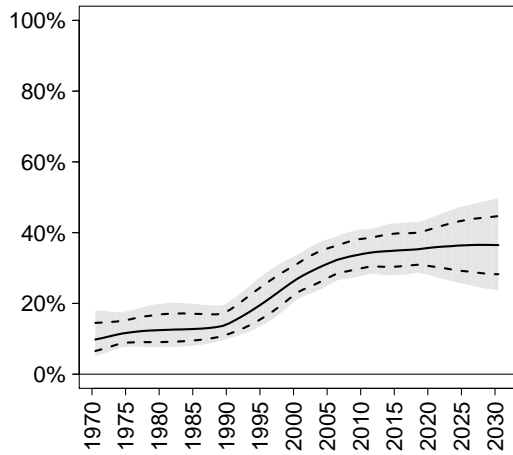

**CP (modern)**

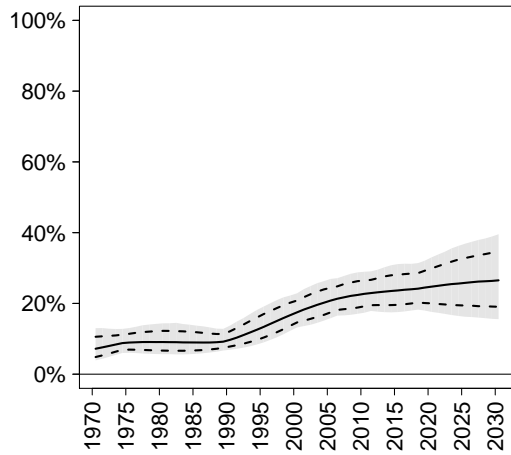

**CP (traditional)**

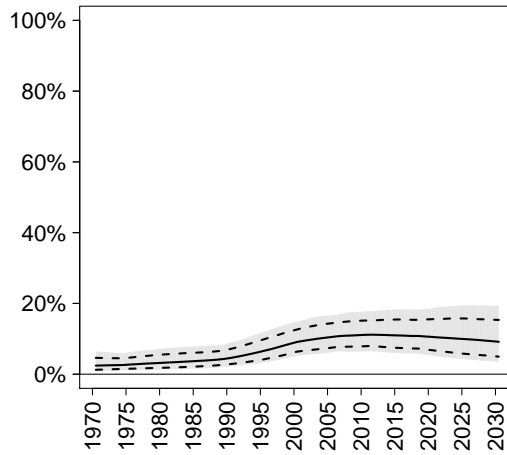

**Unmet need among all unmarried women**

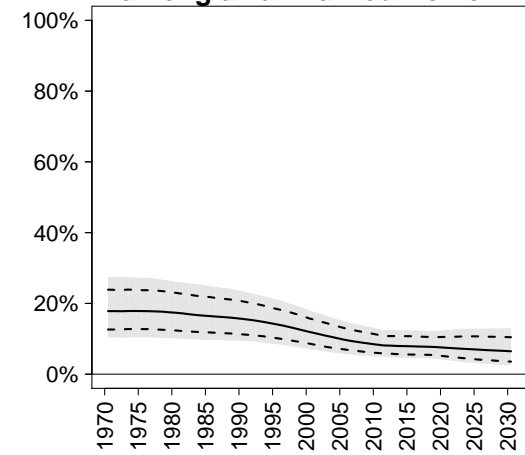

**Total demand**

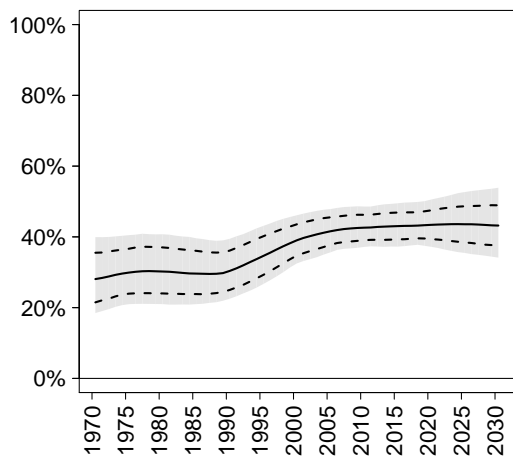

**Demand satisfied (any method)**

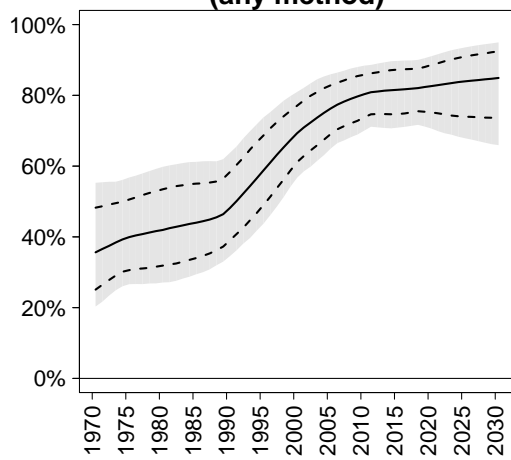

**Demand satisfied (modern methods)**

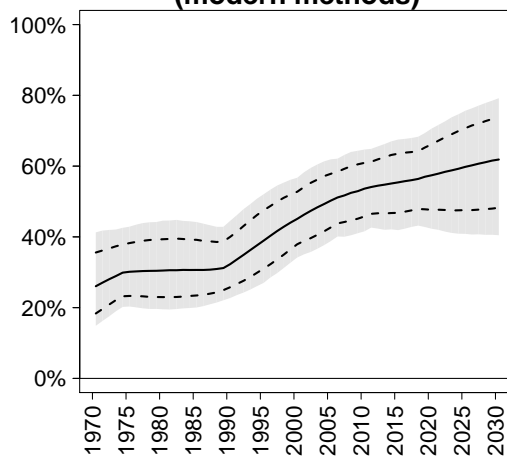

Ireland --- All women

**CP (any)**

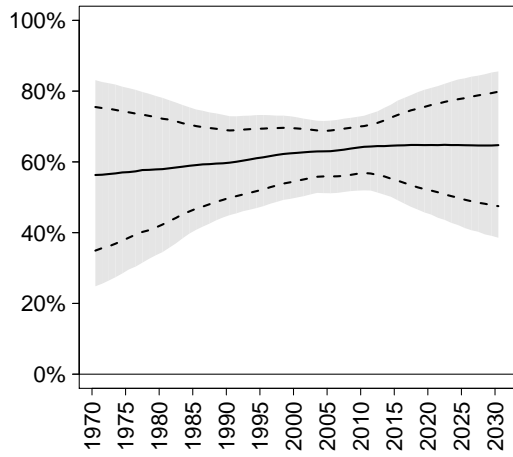

**CP (modern)**

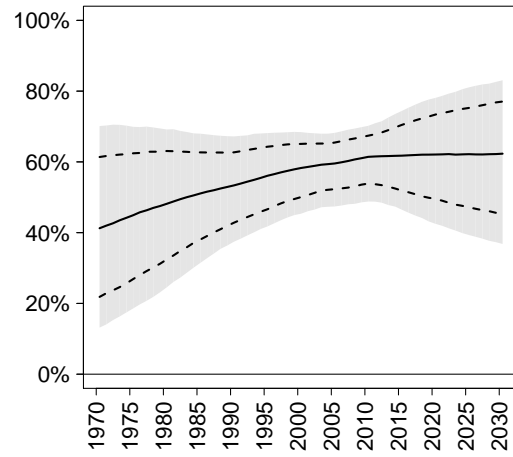

**CP (traditional)**

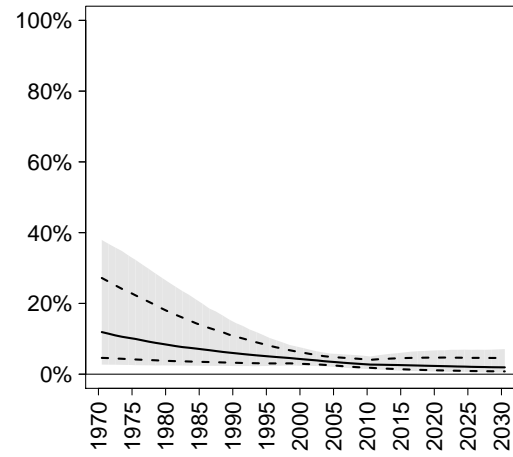

**Unmet need among all unmarried women**

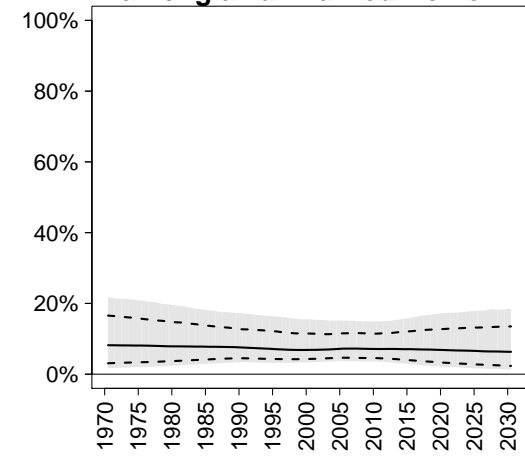

**Total demand**

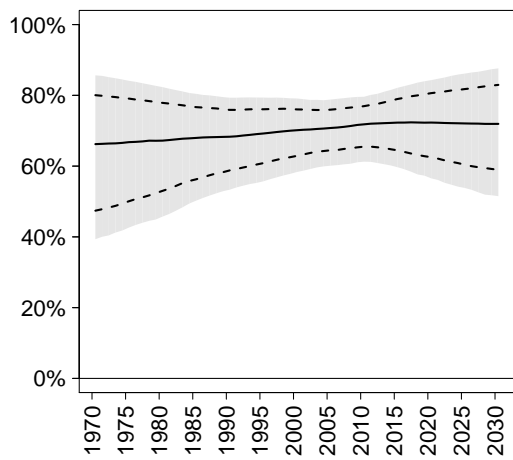

Israel --- All women

**CP (any)**

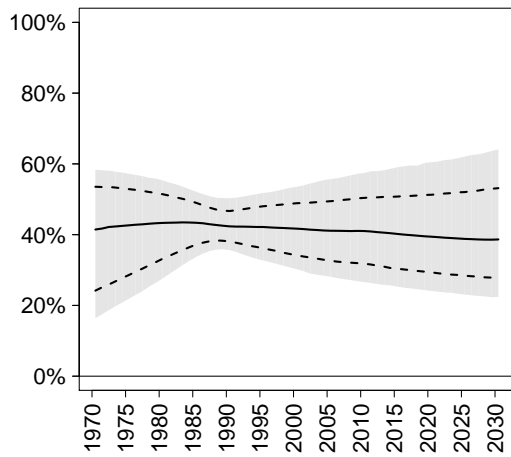

**CP (modern)**

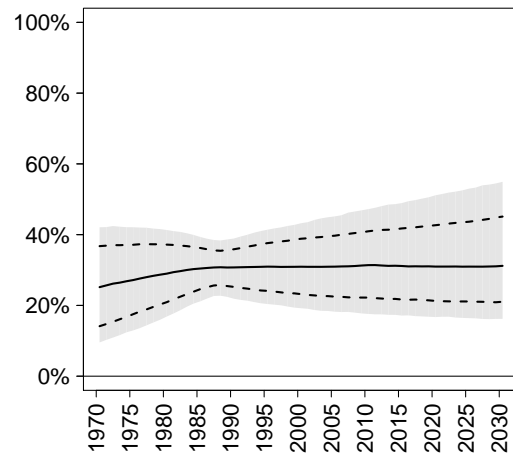

**CP (traditional)**

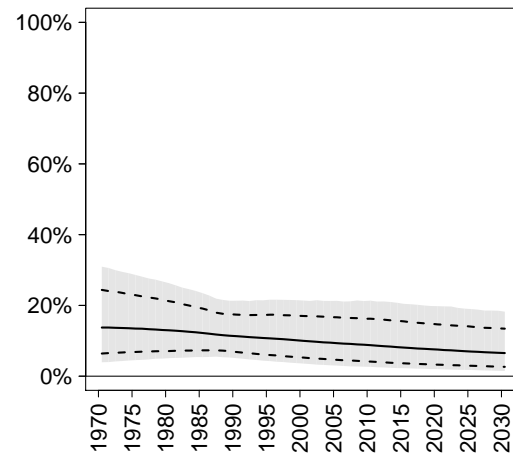

**Unmet need among all unmarried women**

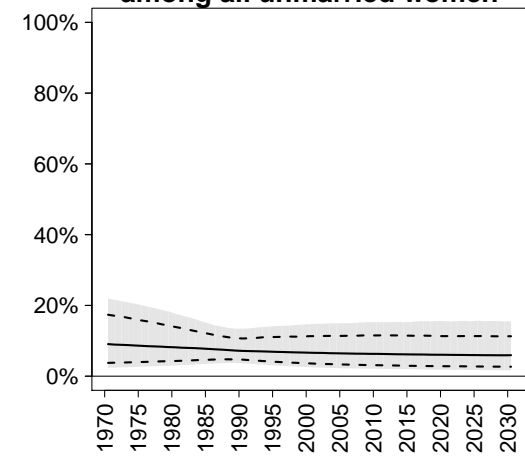

**Total demand**

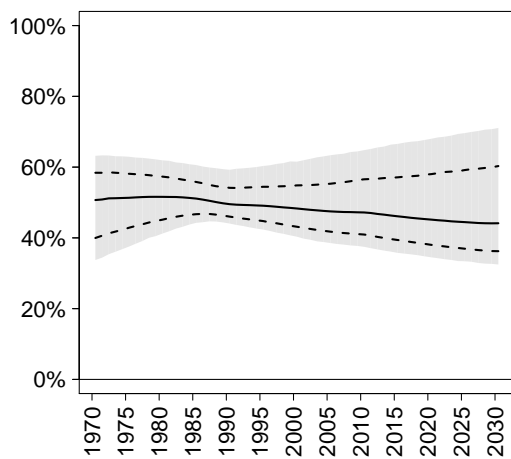

Italy --- All women

**CP (any)**

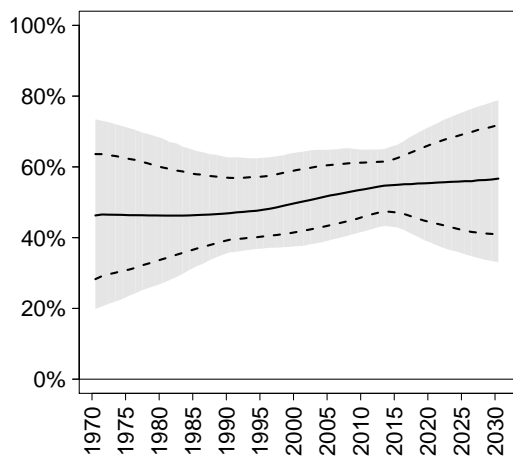

**CP (modern)**

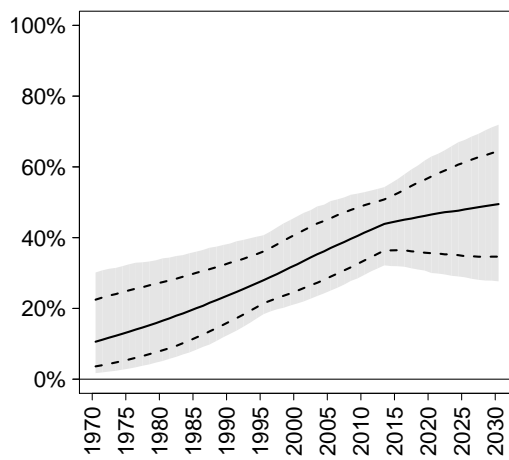

**CP (traditional)**

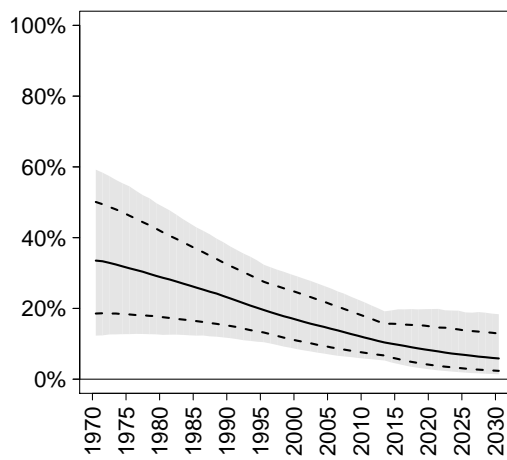

**Unmet need among all unmarried women**

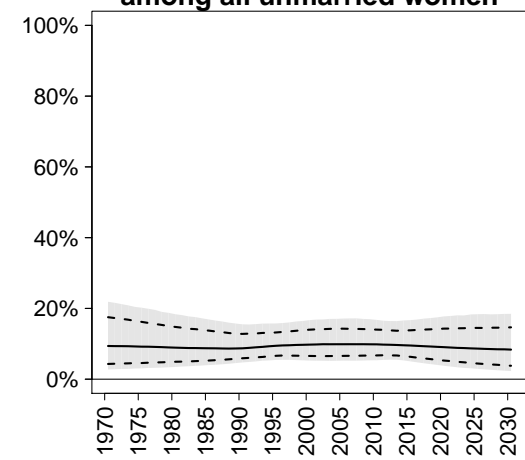

**Total demand**

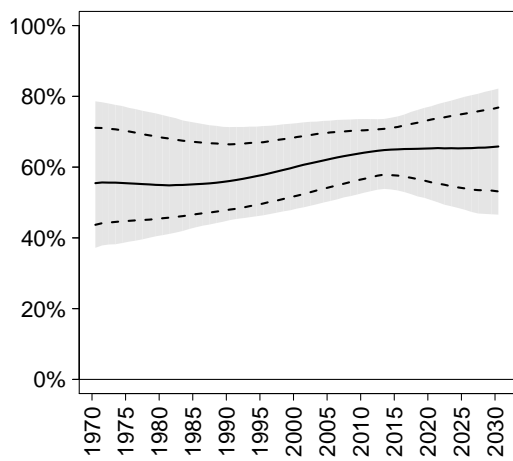

**Demand satisfied (any method)**

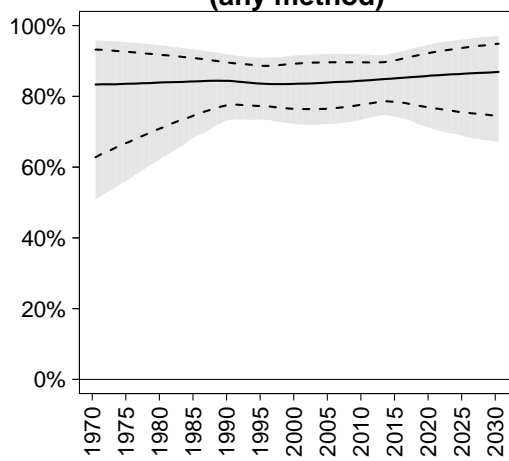

**Demand satisfied (modern methods)**

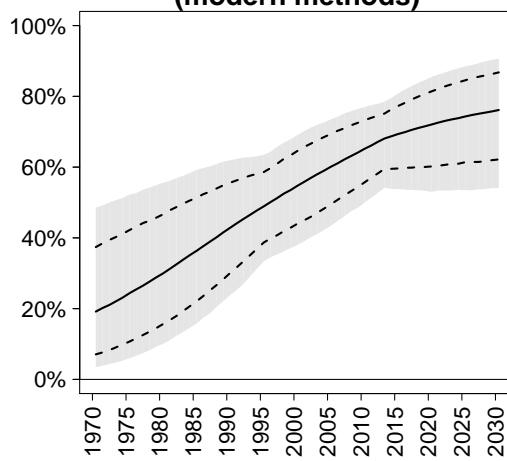

Jamaica --- All women

**CP (any)**

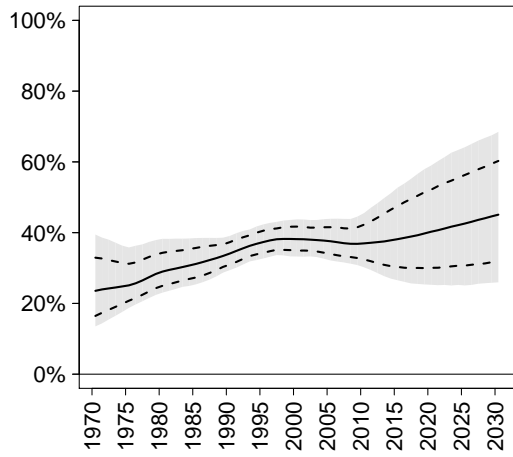

**CP (modern)**

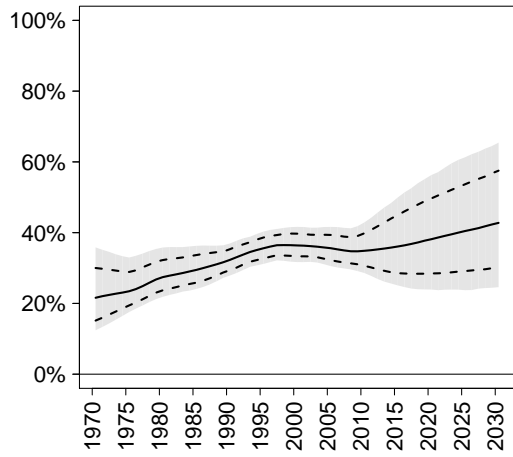

**CP (traditional)**

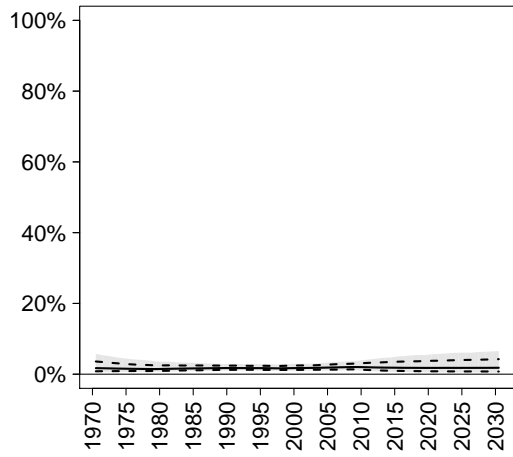

**Unmet need among all unmarried women**

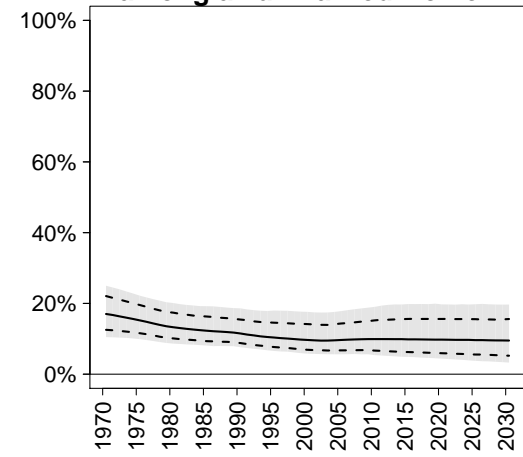

**Total demand**

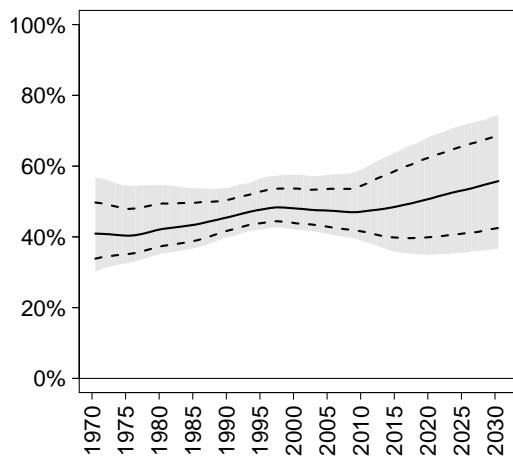

**Demand satisfied (any method)**

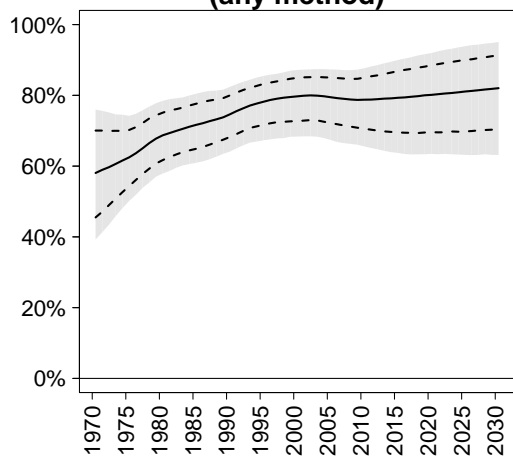

**Demand satisfied (modern methods)**

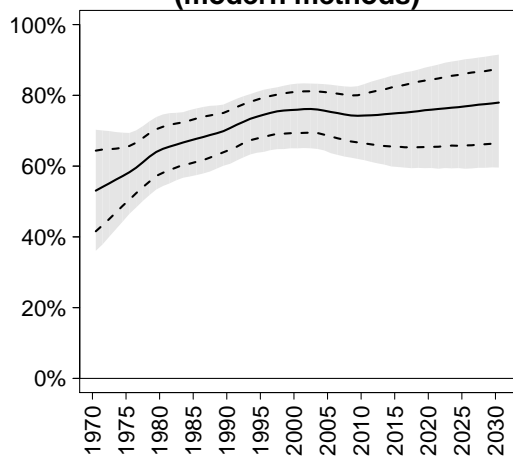

Japan --- All women

**CP (any)**

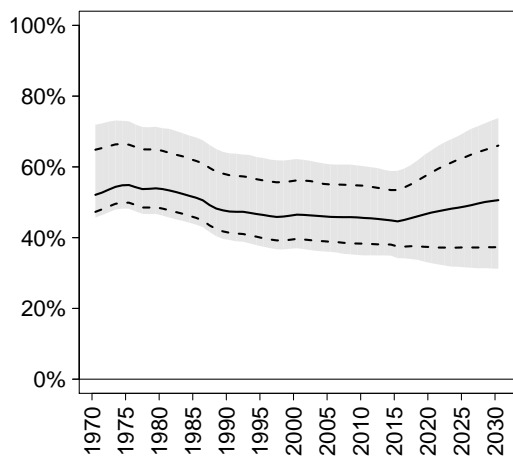

**CP (modern)**

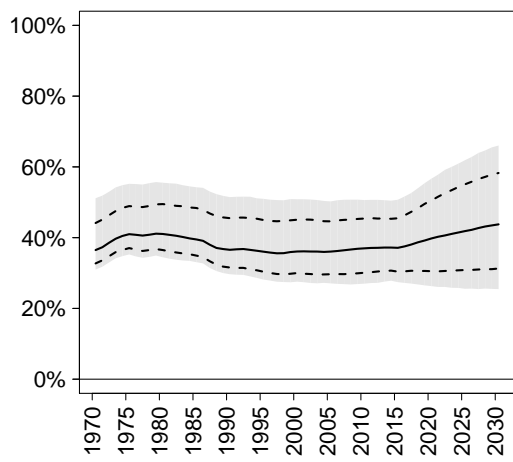

**CP (traditional)**

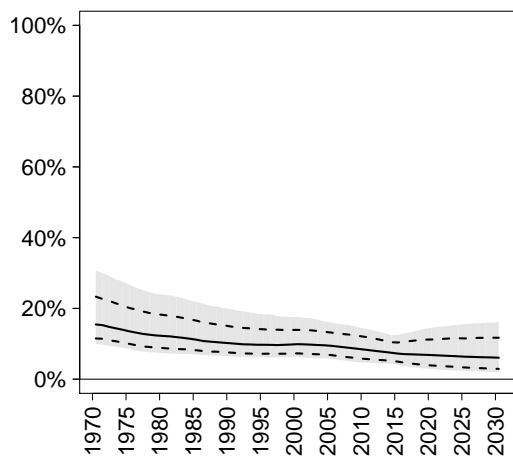

**Unmet need among all unmarried women**

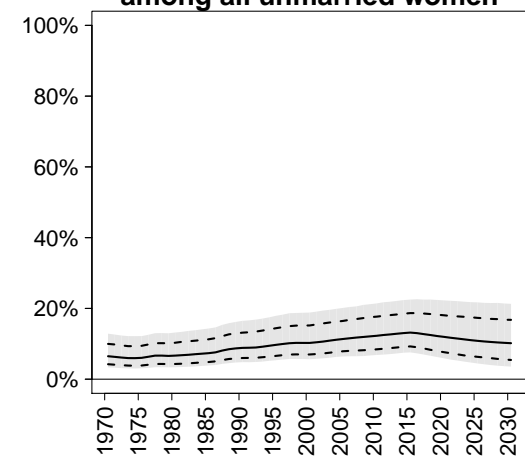

**Total demand**

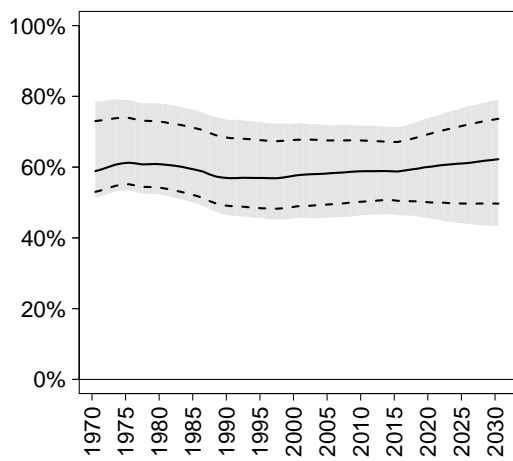

Jordan --- All women

**CP (any)**

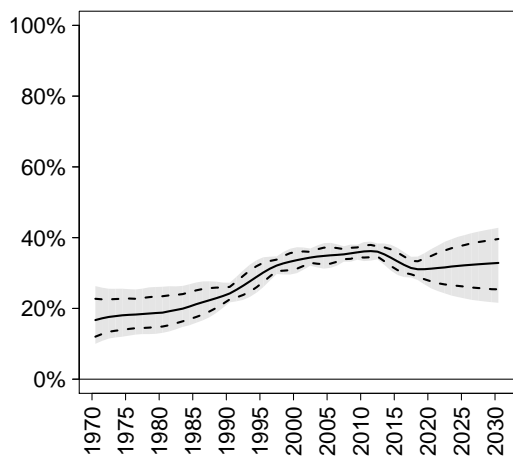

**CP (modern)**

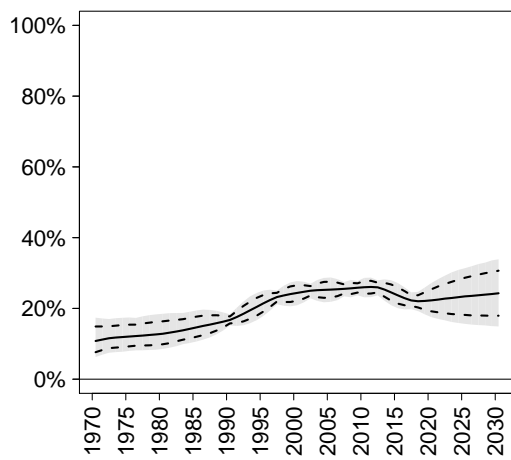

**CP (traditional)**

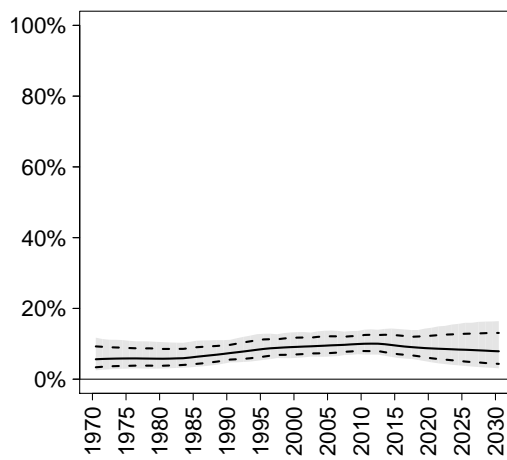

**Unmet need among all unmarried women**

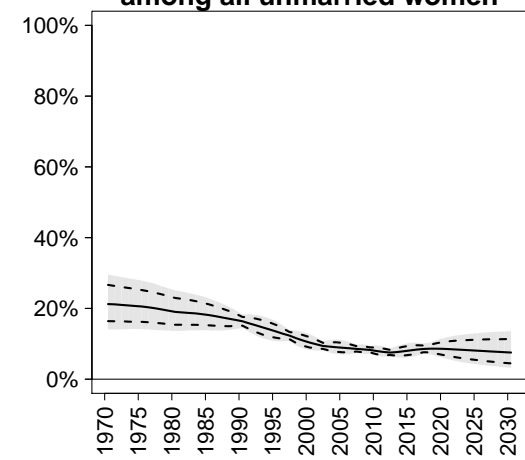

**Total demand**

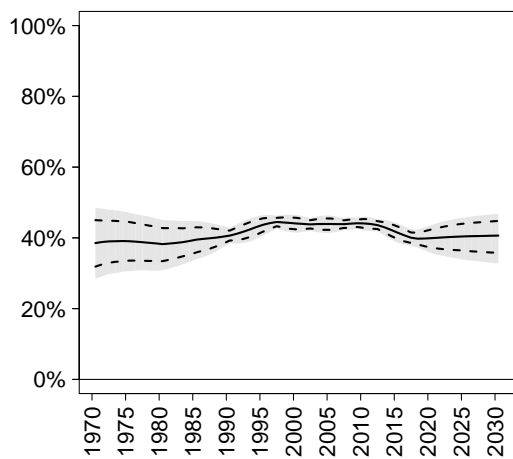

**Demand satisfied (any method)**

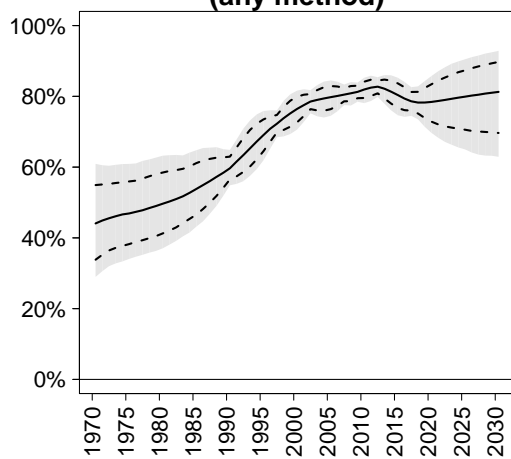

**Demand satisfied (modern methods)**

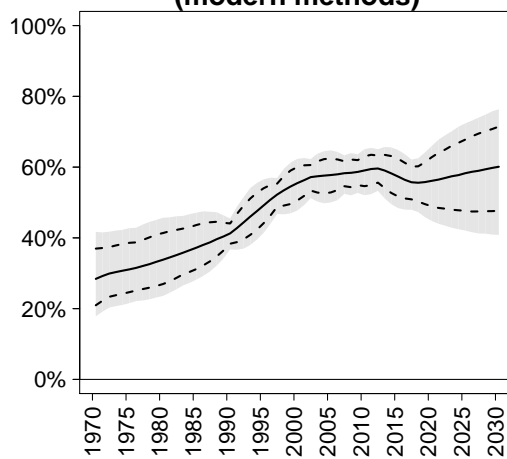

Kazakhstan --- All women

**CP (any)**

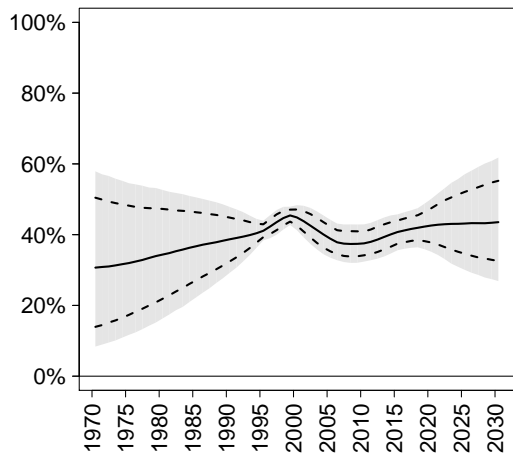

**CP (modern)**

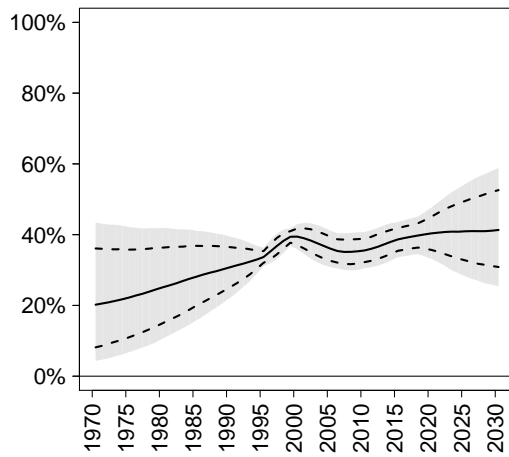

**CP (traditional)**

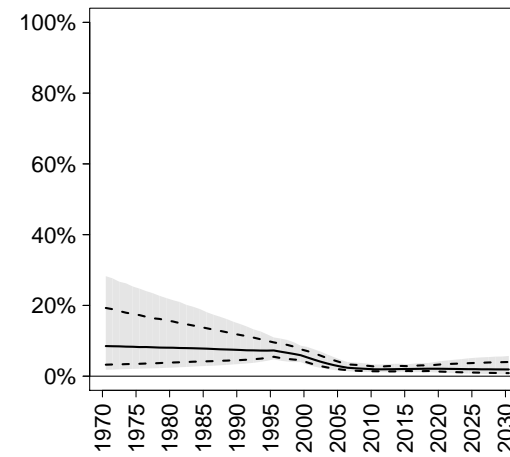

**Unmet need among all unmarried women**

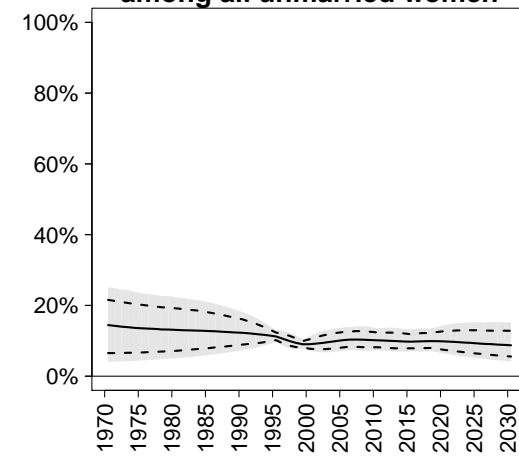

**Total demand**

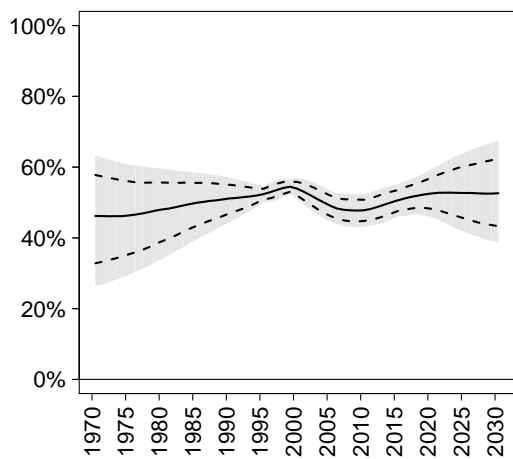

**Demand satisfied (any method)**

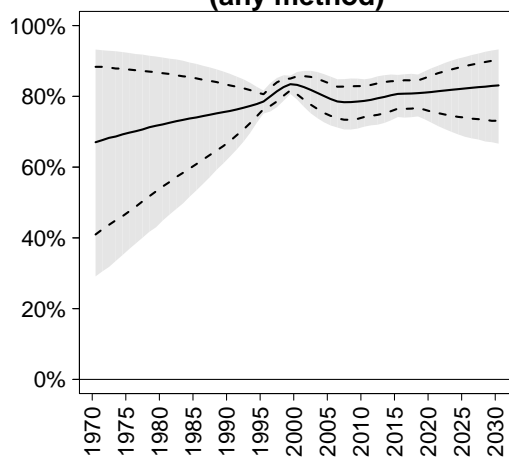

**Demand satisfied (modern methods)**

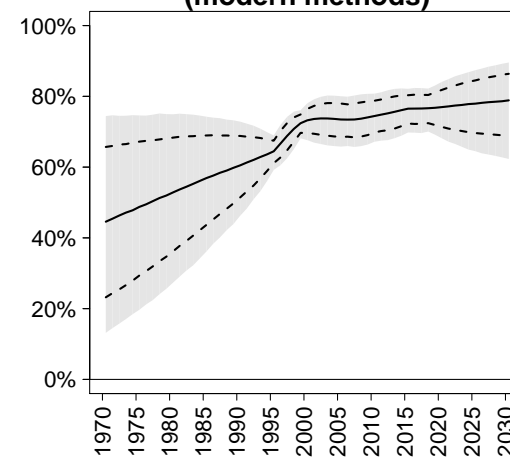



Kenya ---- All women

**CP (any)**

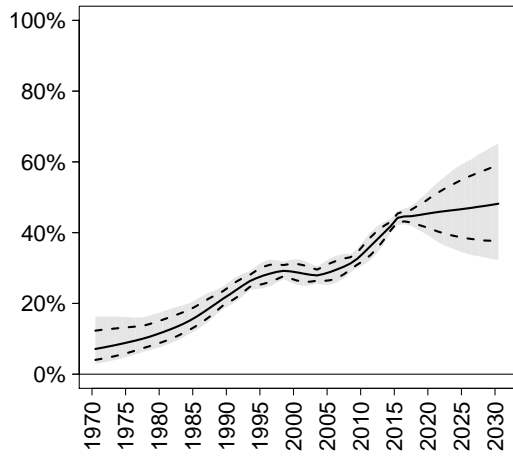

**CP (modern)**

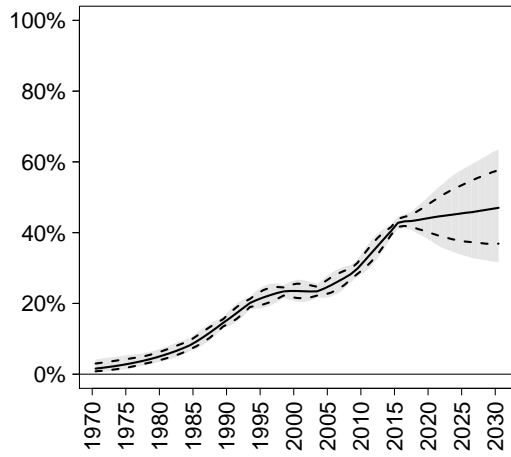

**CP (traditional)**

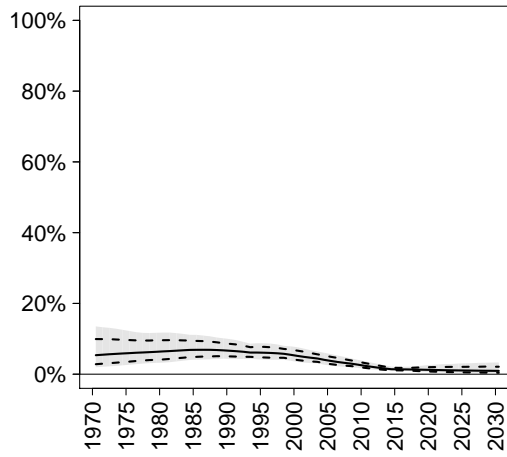

**Unmet need among all unmarried women**

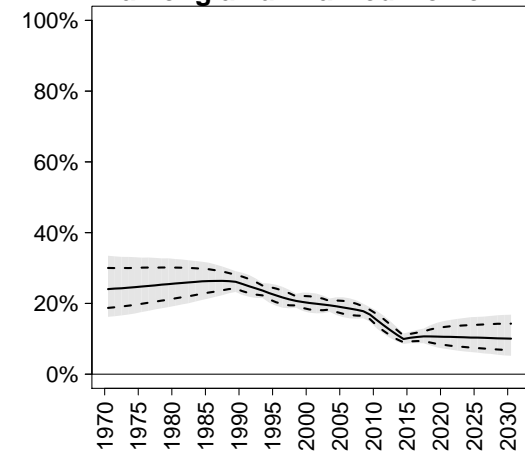

**Total demand**

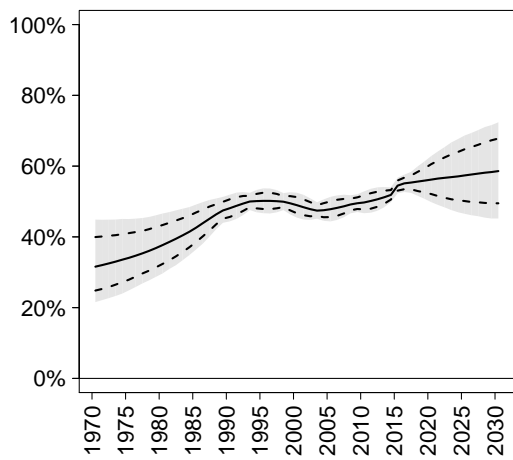

**Demand satisfied (any method)**

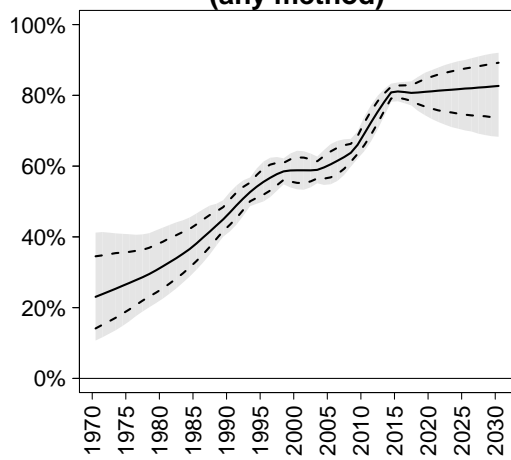

**Demand satisfied (modern methods)**

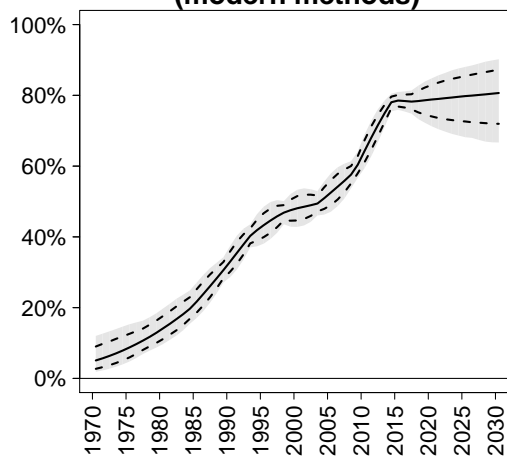

Kiribati --- All women

**CP (any)**

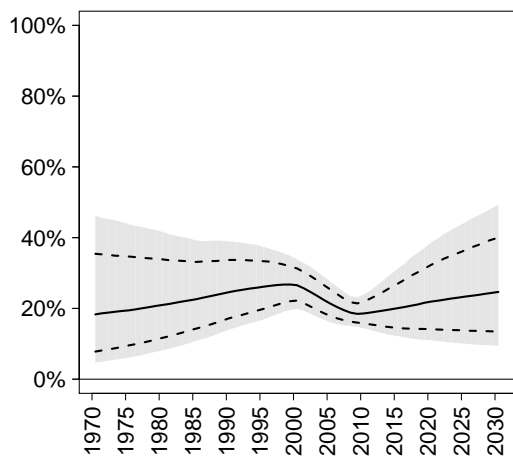

**CP (modern)**

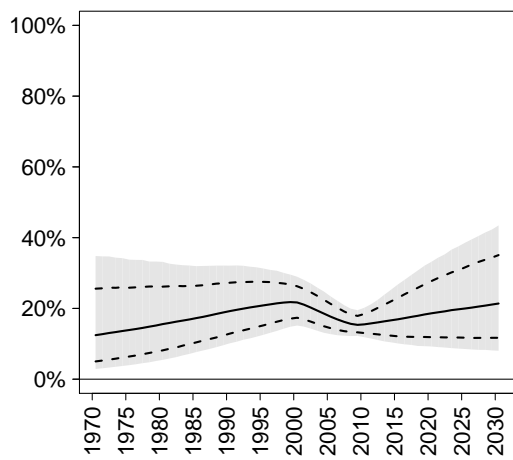

**CP (traditional)**

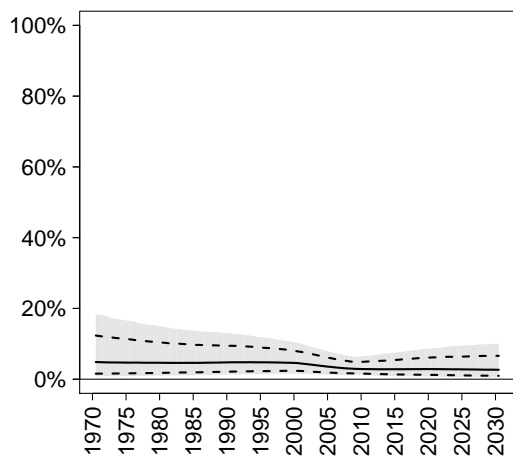

**Unmet need among all unmarried women**

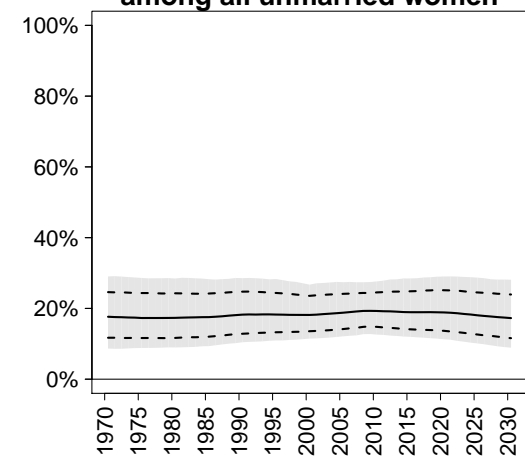

**Total demand**

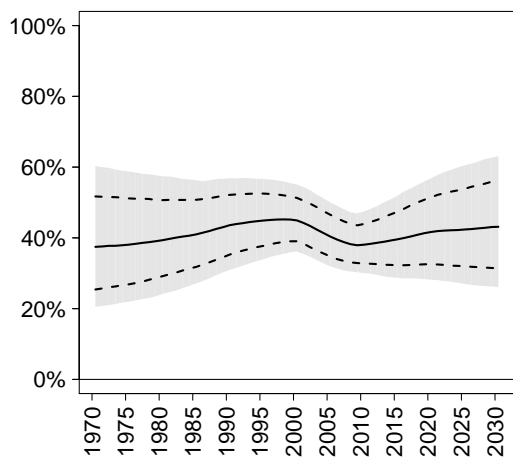

**Demand satisfied (any method)**

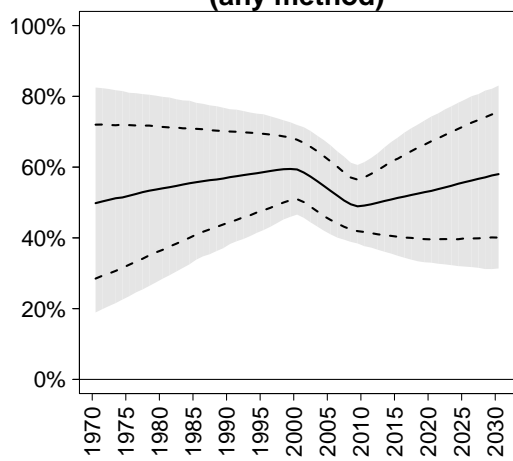

**Demand satisfied (modern methods)**

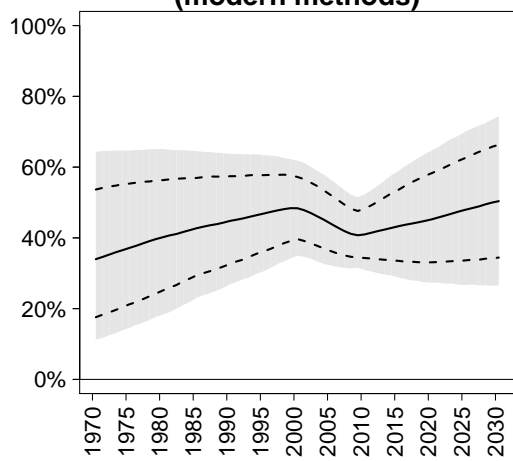

Kuwait --- All women

**CP (any)**

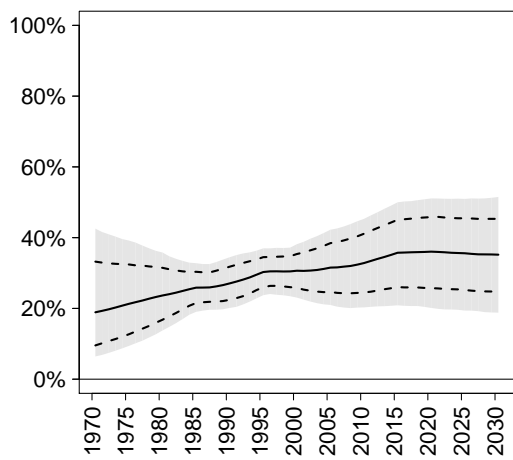

**CP (modern)**

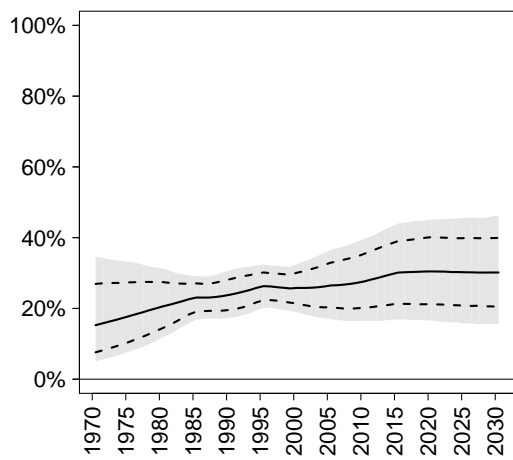

**CP (traditional)**

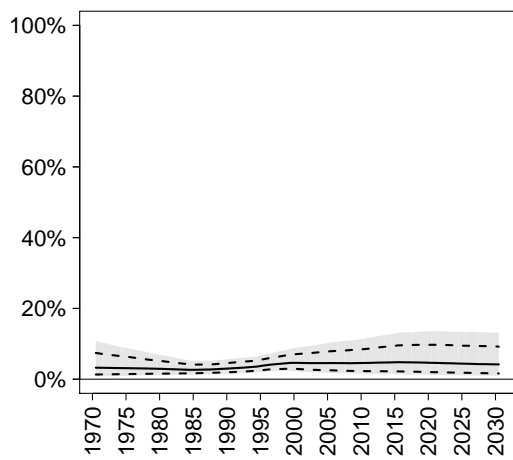

**Unmet need among all unmarried women**

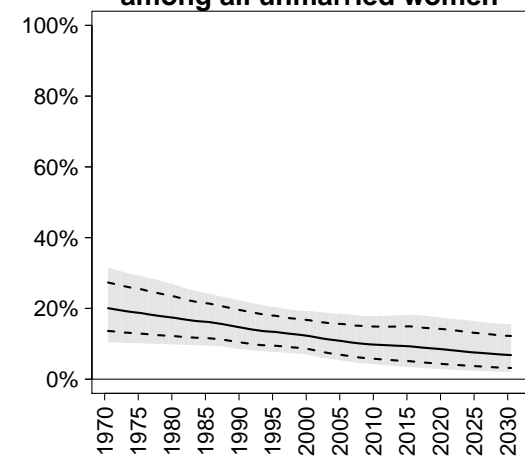

**Total demand**

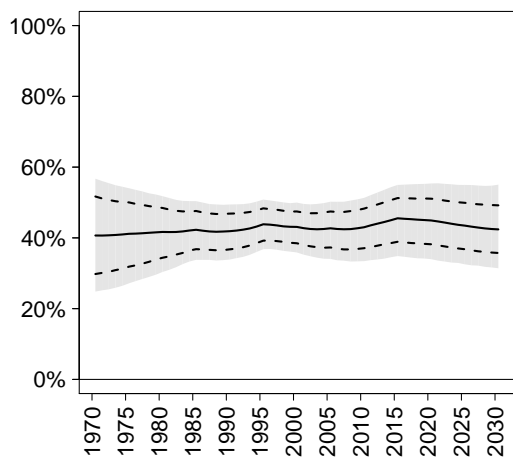

**Demand satisfied (any method)**

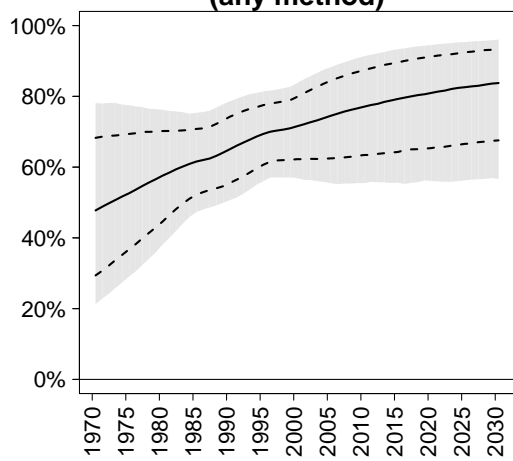

**Demand satisfied (modern methods)**

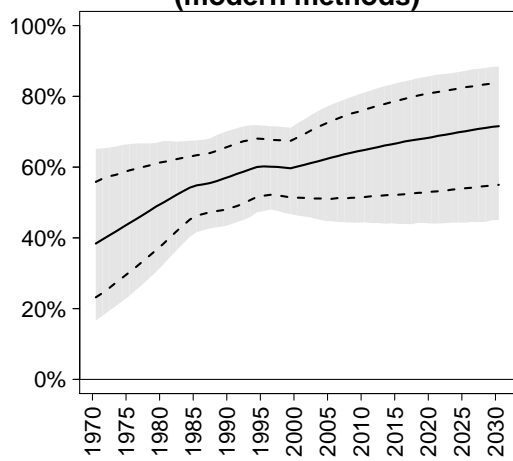

Kyrgyzstan --- All women

**CP (any)**

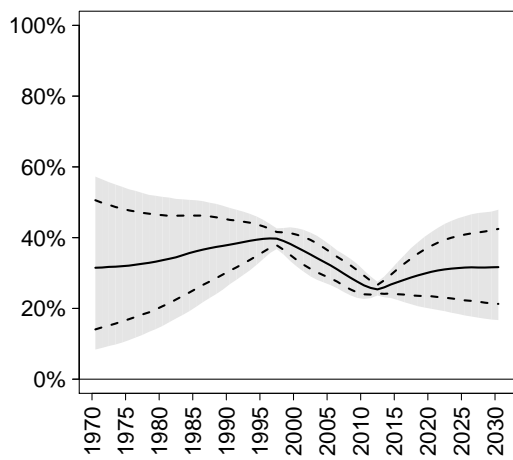

**CP (modern)**

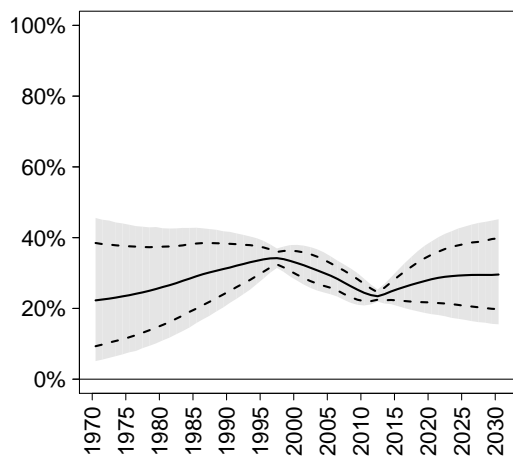

**CP (traditional)**

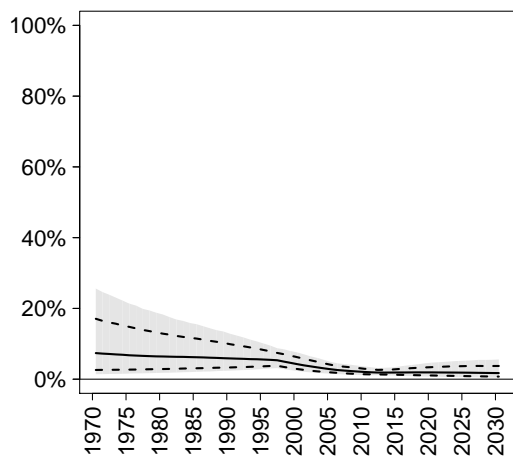

**Unmet need among all unmarried women**

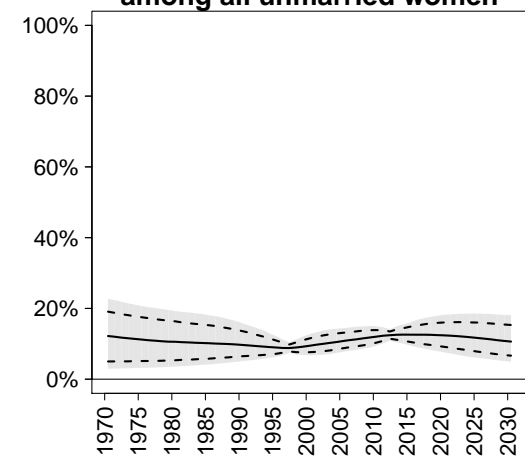

**Total demand**

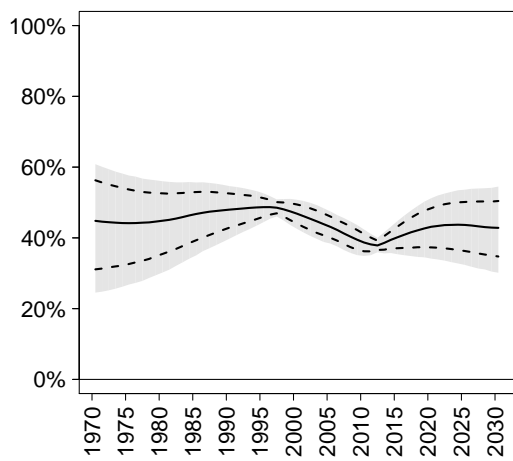

**Demand satisfied (any method)**

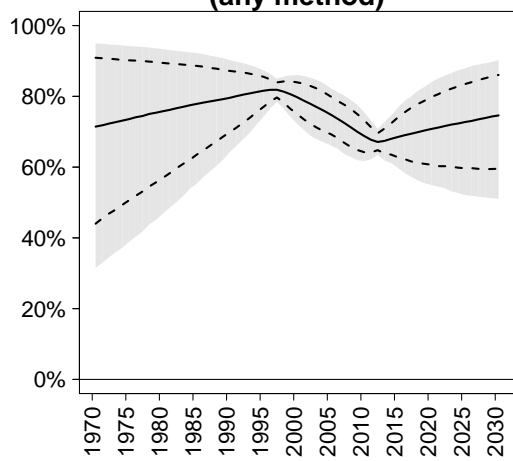

**Demand satisfied (modern methods)**

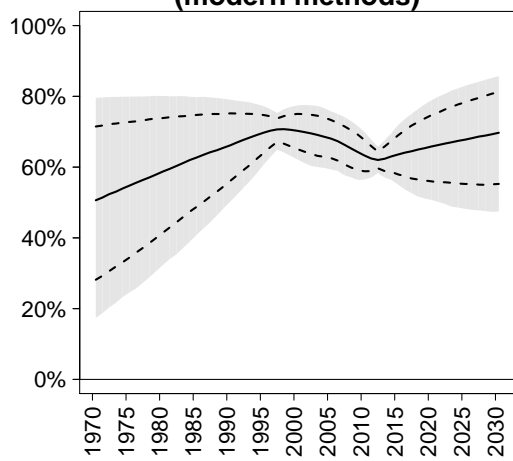

Lao People's Democratic Republic --- All women

**CP (any)**

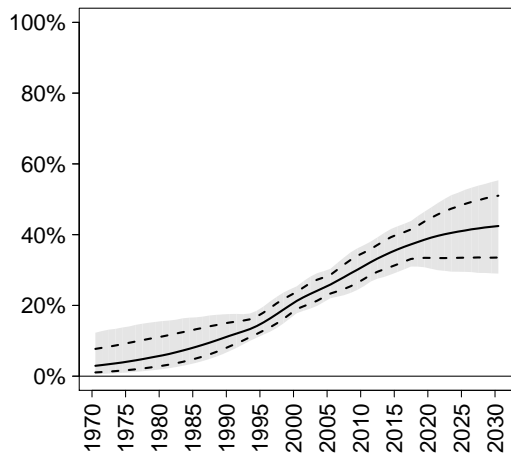

**CP (modern)**

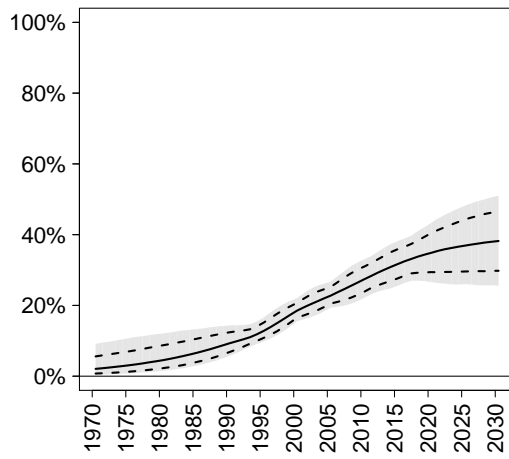

**CP (traditional)**

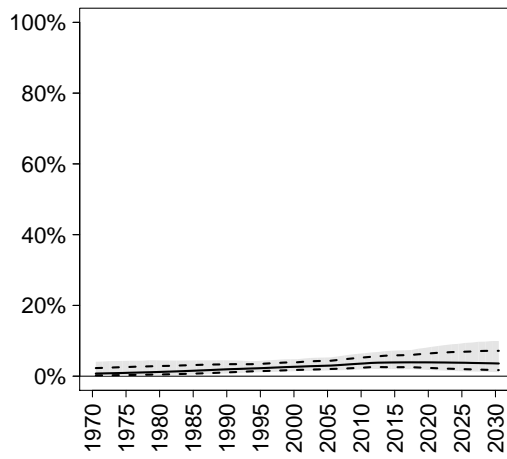

**Unmet need among all unmarried women**

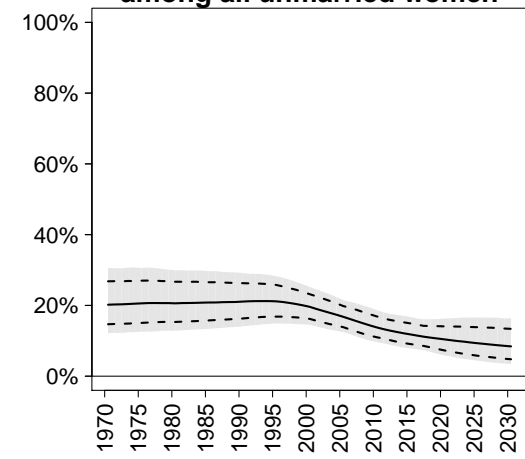

**Total demand**

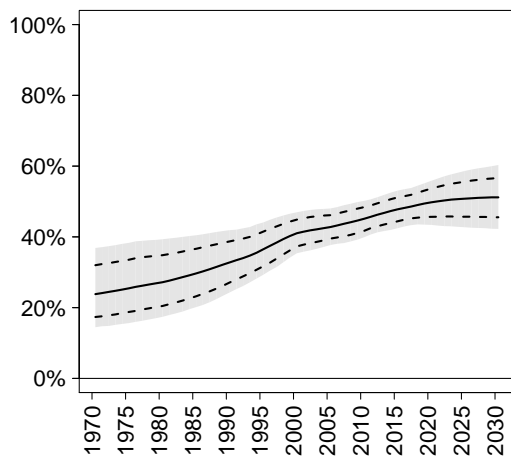

**Demand satisfied (any method)**

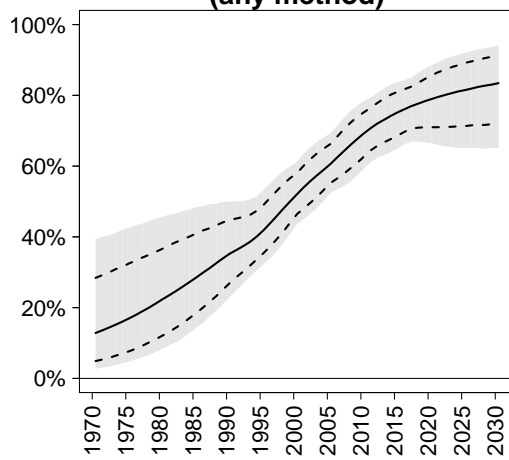

**Demand satisfied (modern methods)**

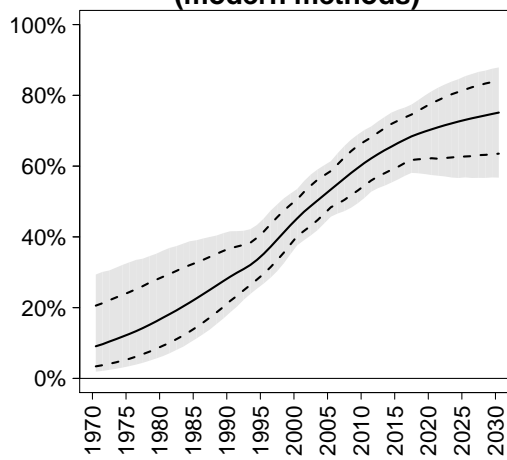

Latvia --- All women

**CP (any)**

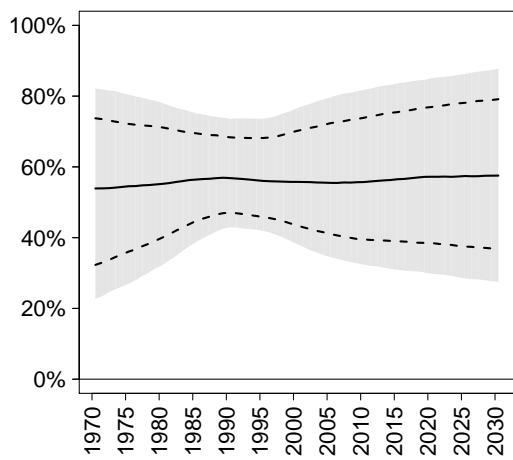

**CP (modern)**

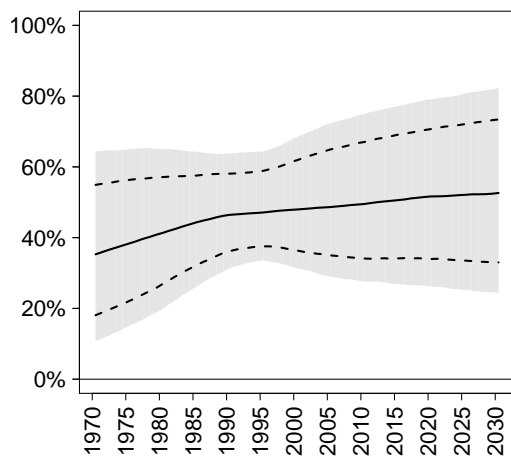

**CP (traditional)**

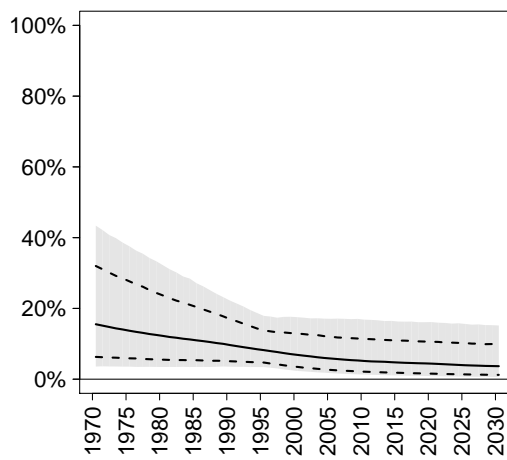

**Unmet need among all unmarried women**

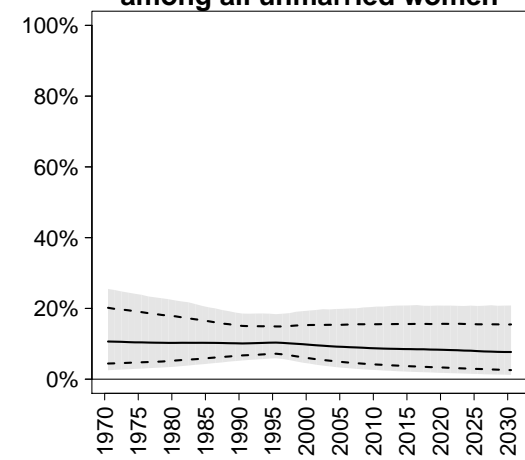

**Total demand**

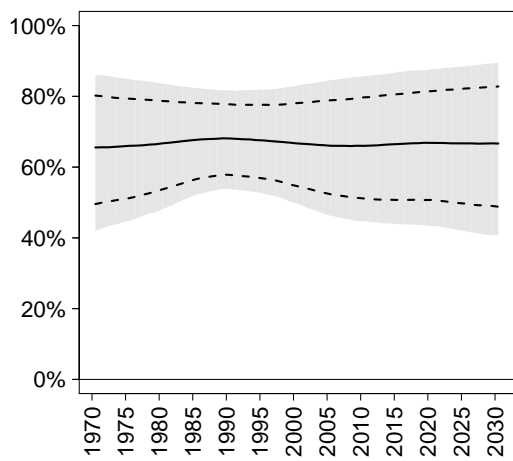

**Demand satisfied (any method)**

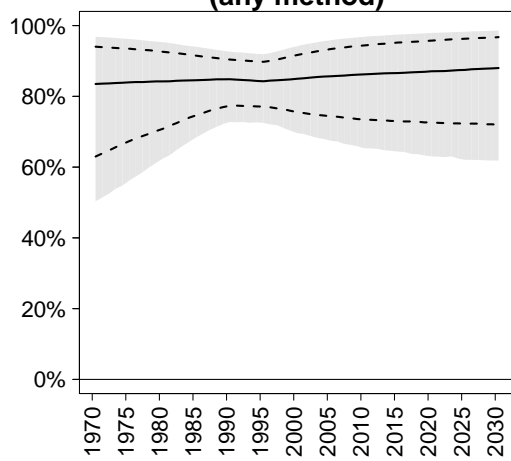

**Demand satisfied (modern methods)**

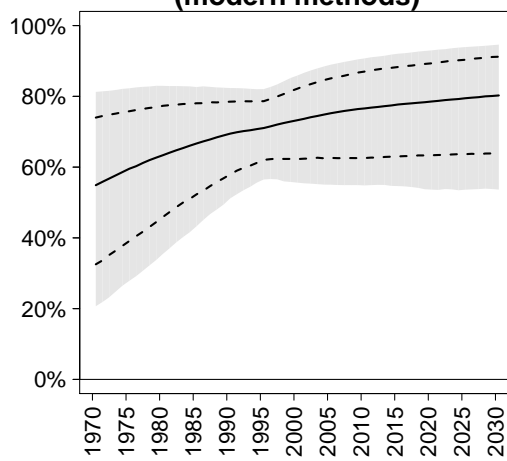

Lebanon --- All women

**CP (any)**

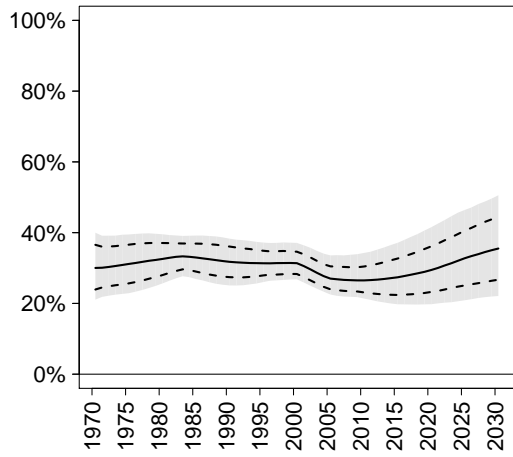

**CP (modern)**

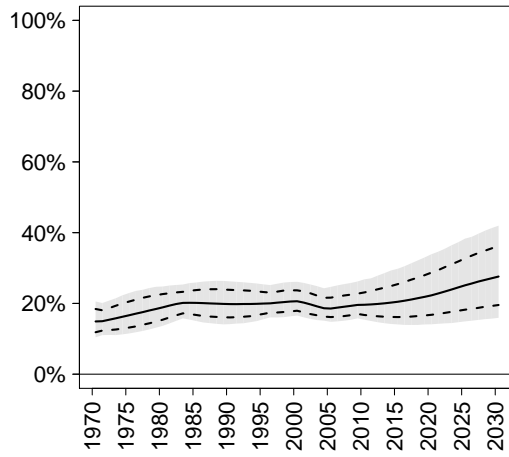

**CP (traditional)**

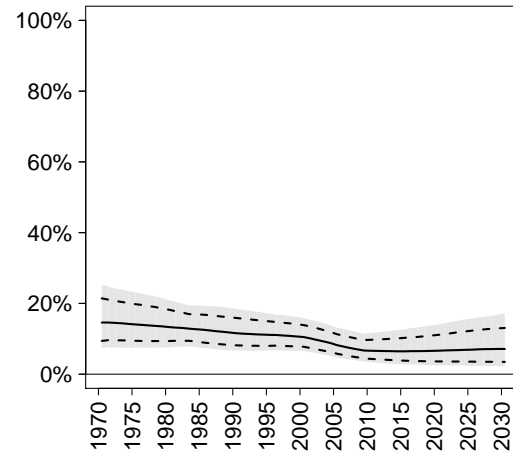

**Unmet need among all unmarried women**

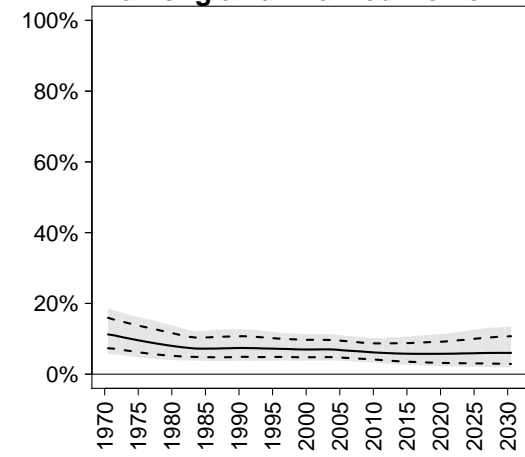

**Total demand**

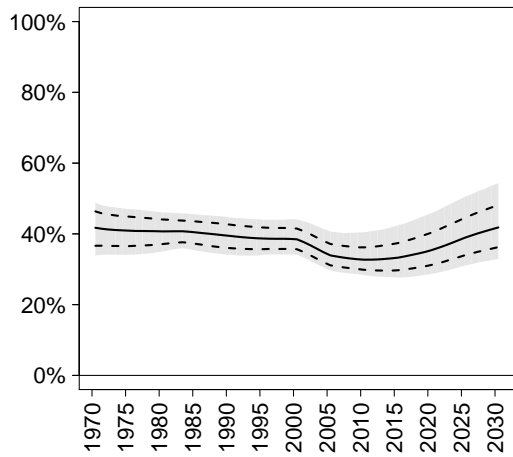

**Demand satisfied (any method)**

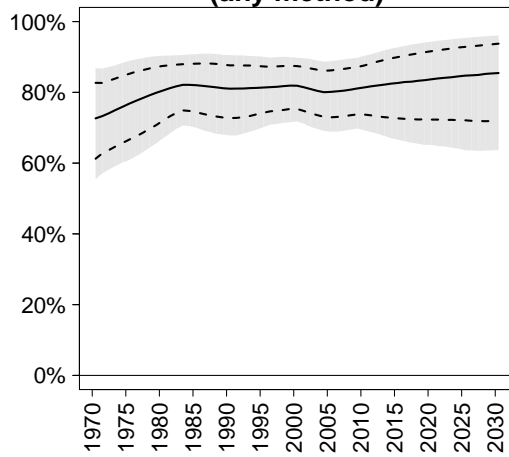

**Demand satisfied (modern methods)**

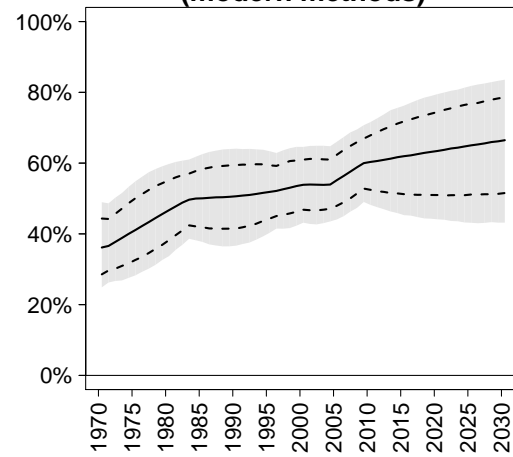

Lesotho --- All women

**CP (any)**

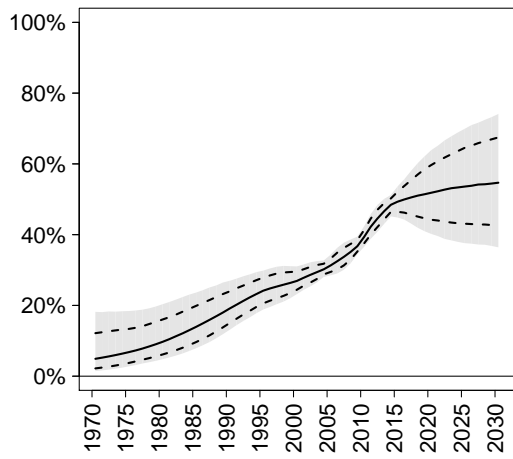

**CP (modern)**

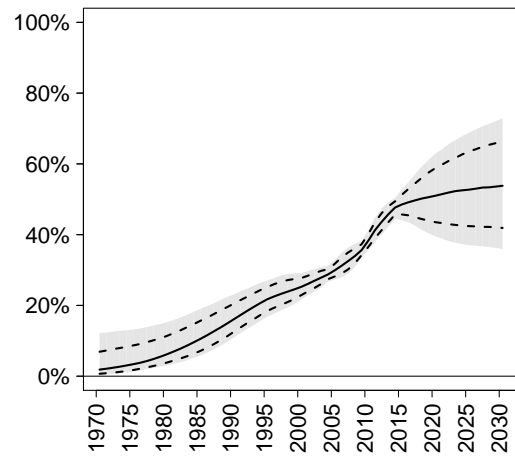

**CP (traditional)**

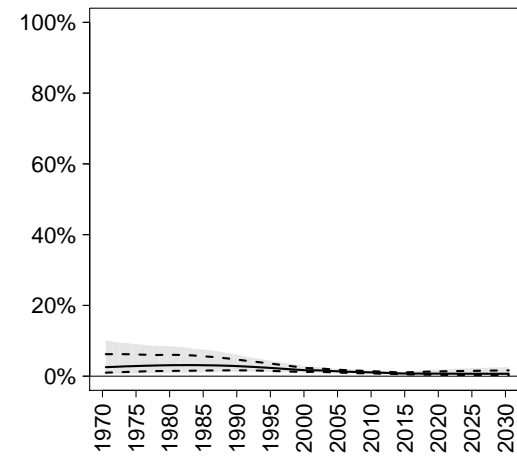

**Unmet need among all unmarried women**

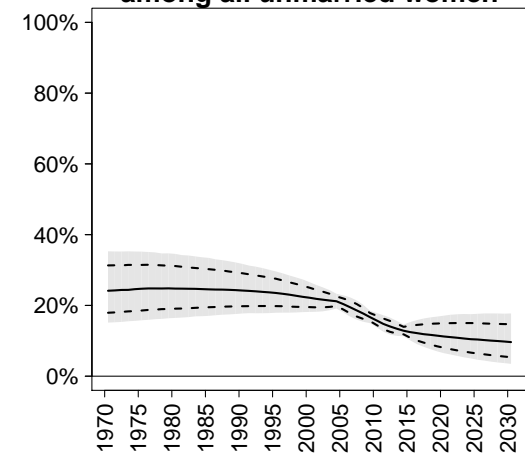

**Total demand**

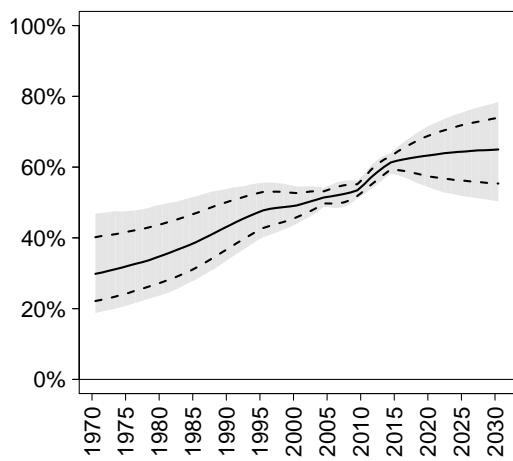



Liberia --- All women

**CP (any)**

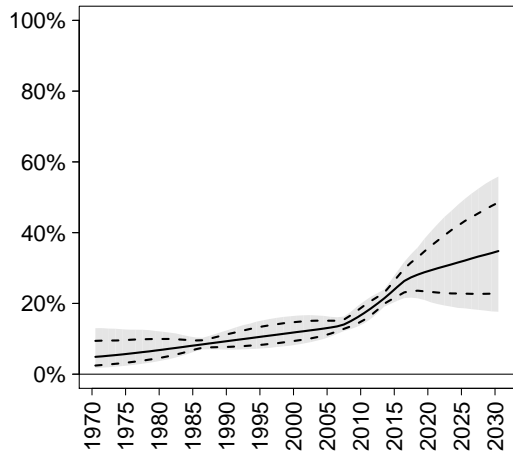

**CP (modern)**

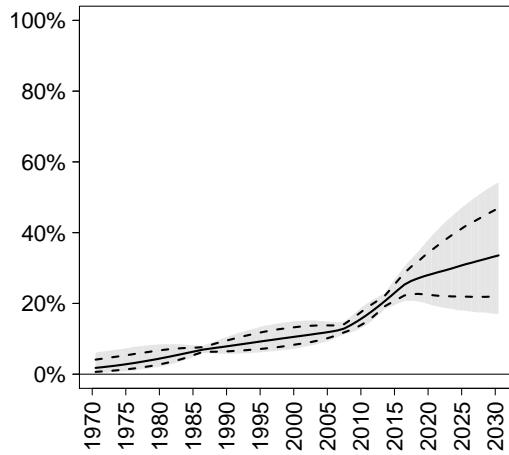

**CP (traditional)**

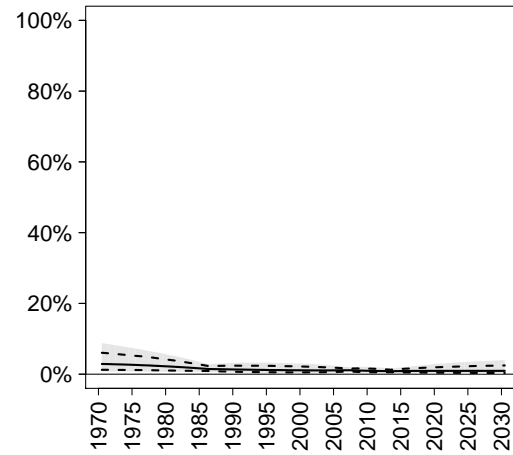

**Unmet need among all unmarried women**

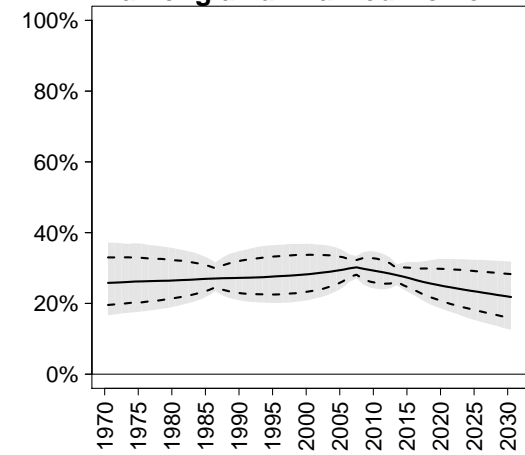

**Total demand**

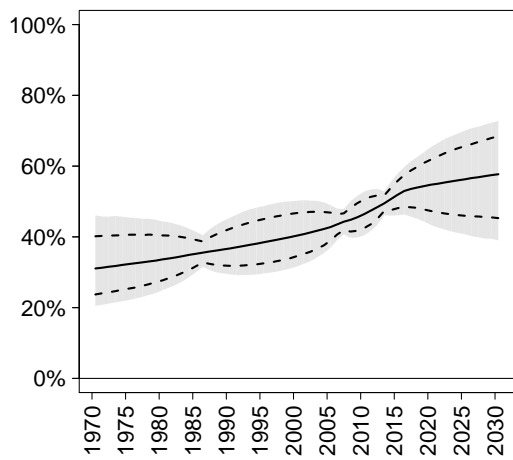

**Demand satisfied (any method)**

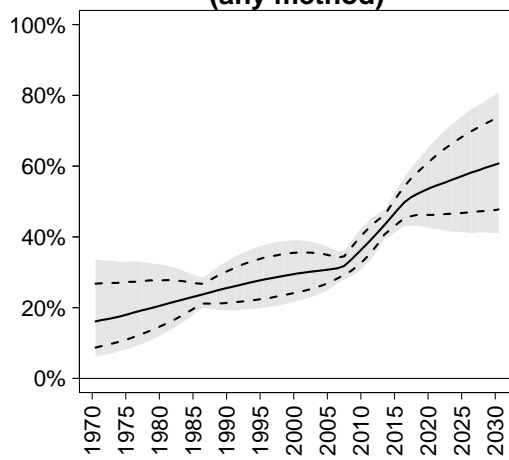

**Demand satisfied (modern methods)**

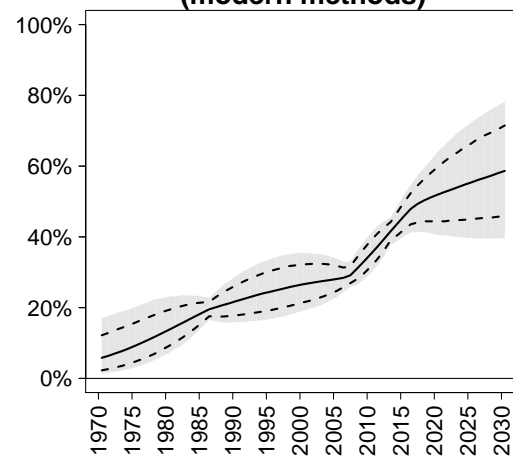

Libya --- All women

**CP (any)**

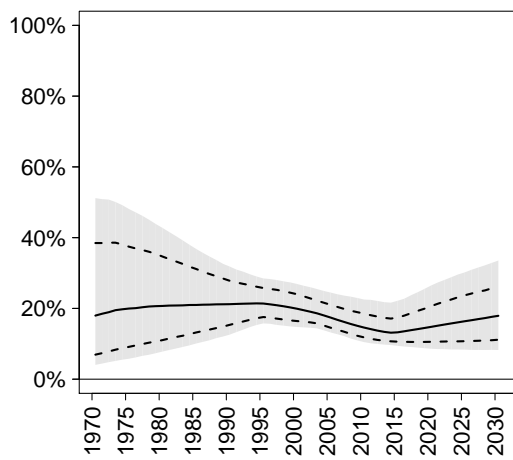

**CP (modern)**

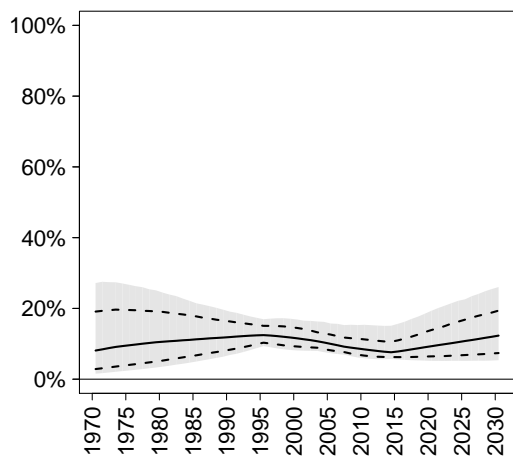

**CP (traditional)**

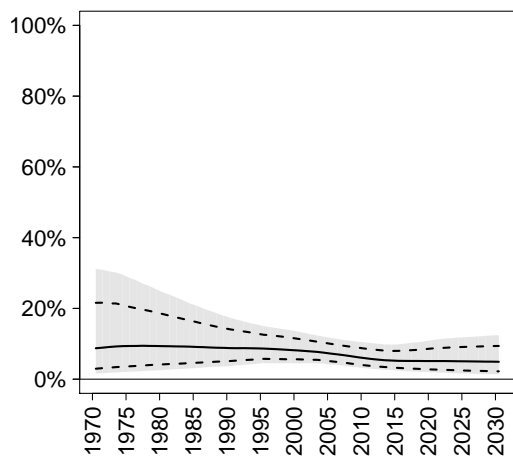

**Unmet need among all unmarried women**

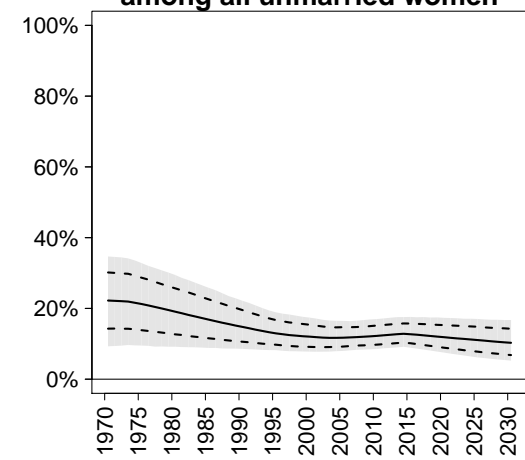

**Total demand**

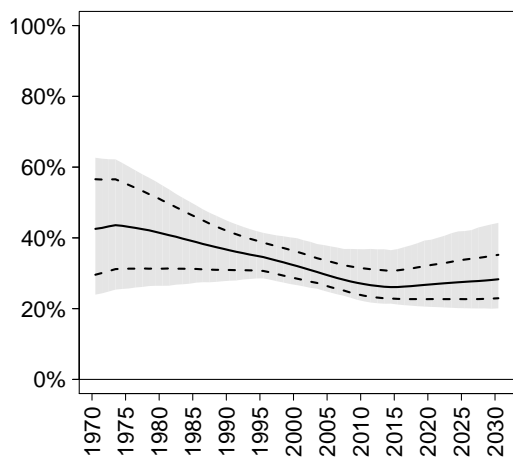

**Demand satisfied (any method)**

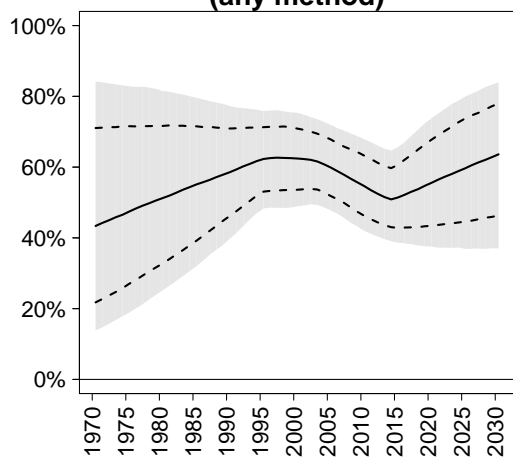

**Demand satisfied (modern methods)**

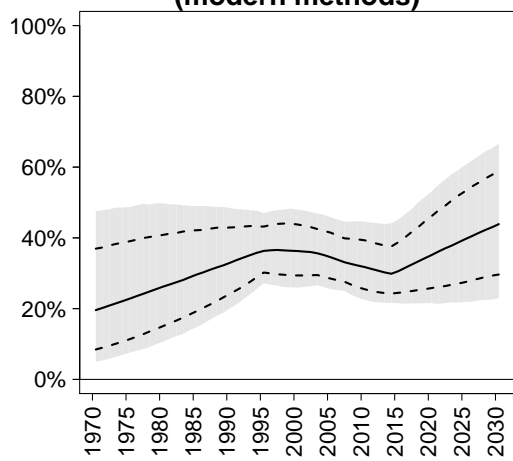

Lithuania --- All women

**CP (any)**

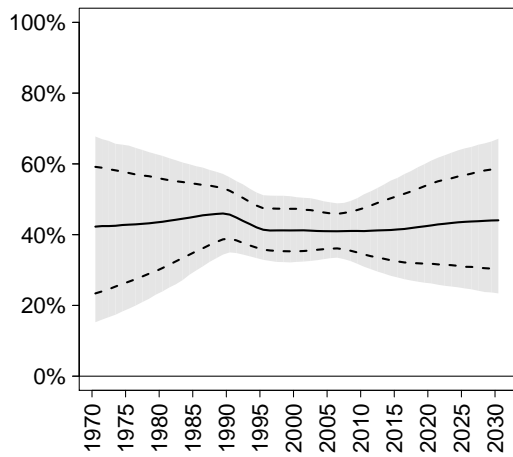

**CP (modern)**

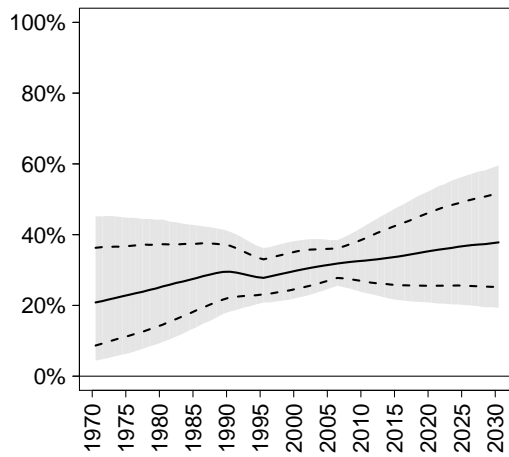

**CP (traditional)**

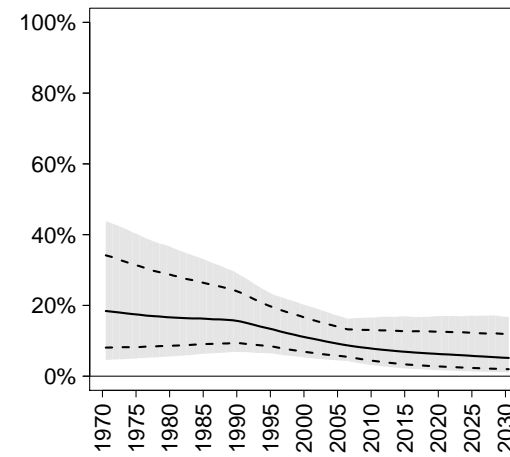

**Unmet need among all unmarried women**

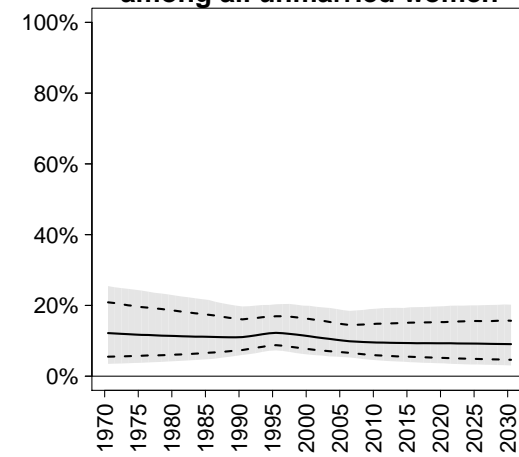

**Total demand**

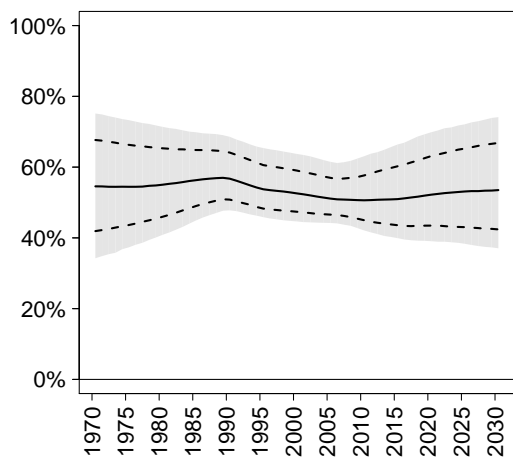

**Demand satisfied (any method)**

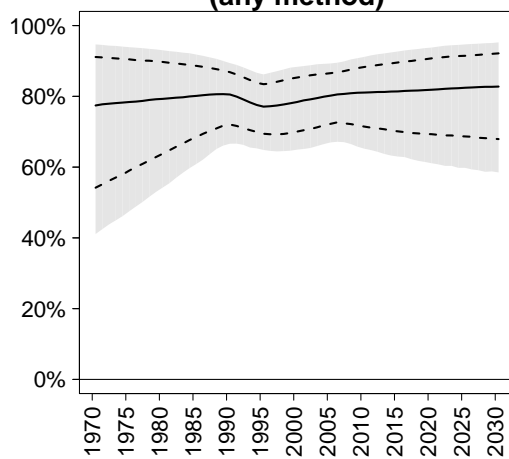

**Demand satisfied (modern methods)**

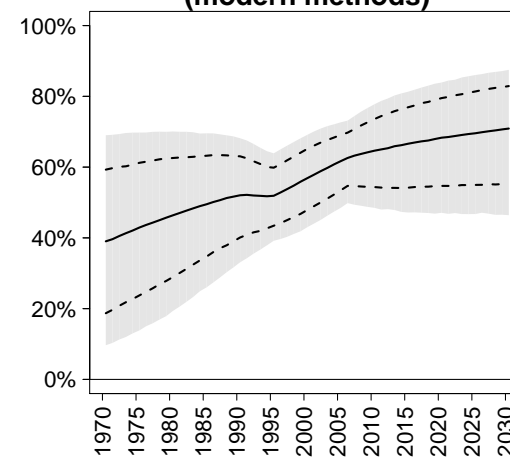

Madagascar --- All women

**CP (any)**

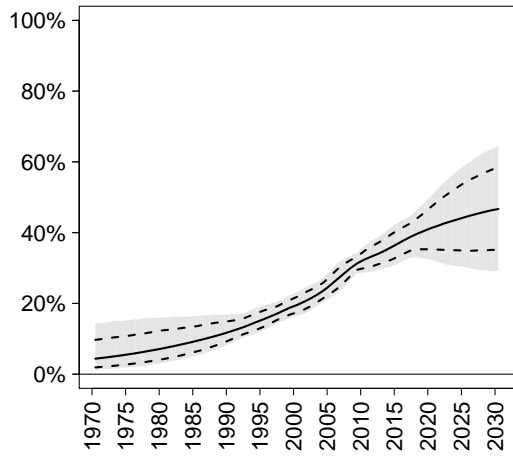

**CP (modern)**

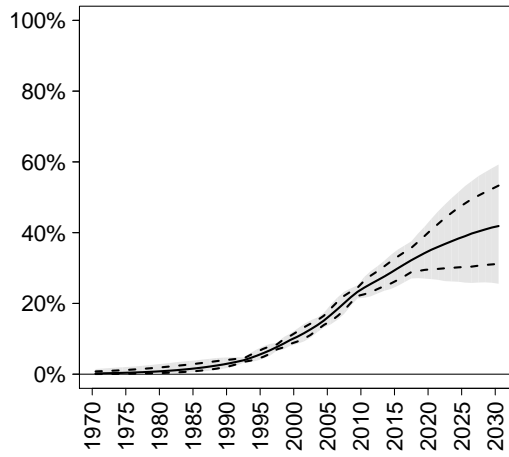

**CP (traditional)**

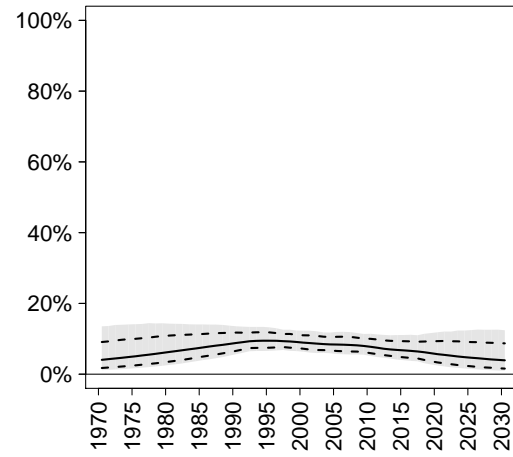

**Unmet need among all unmarried women**

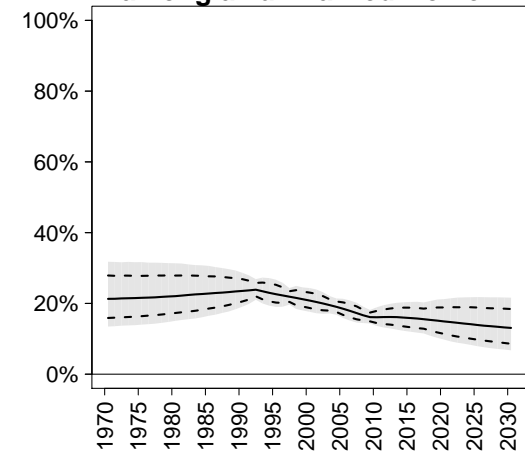

**Total demand**

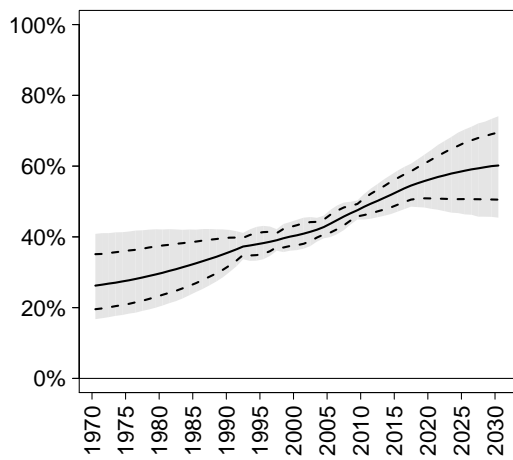

Malawi --- All women

**CP (any)**

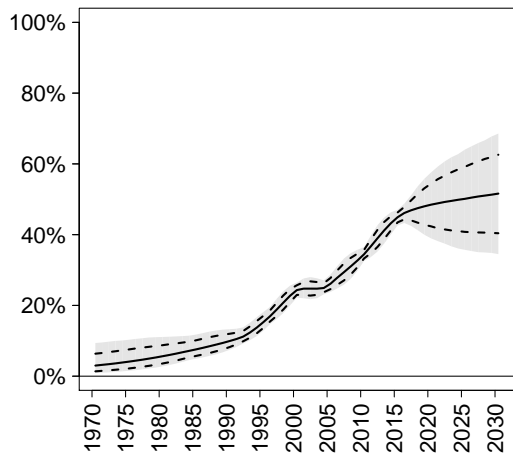

**CP (modern)**

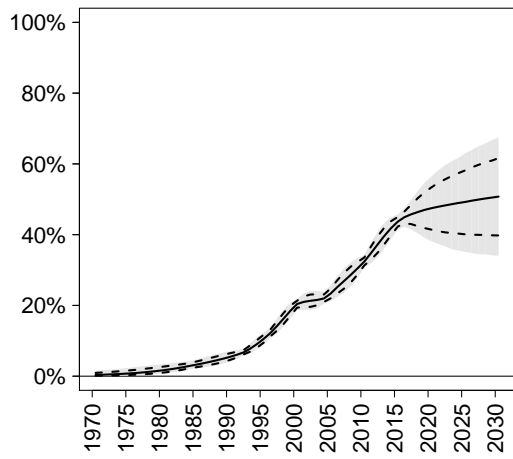

**CP (traditional)**

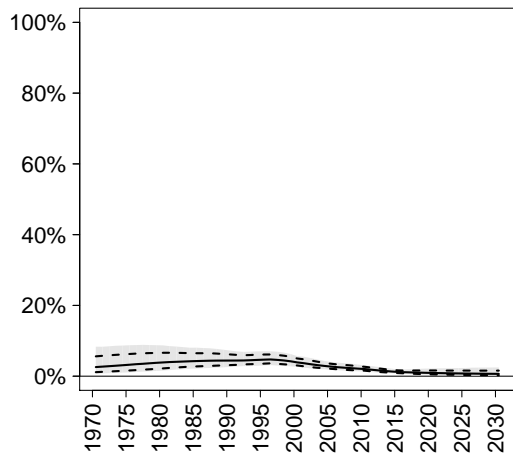

**Unmet need among all unmarried women**

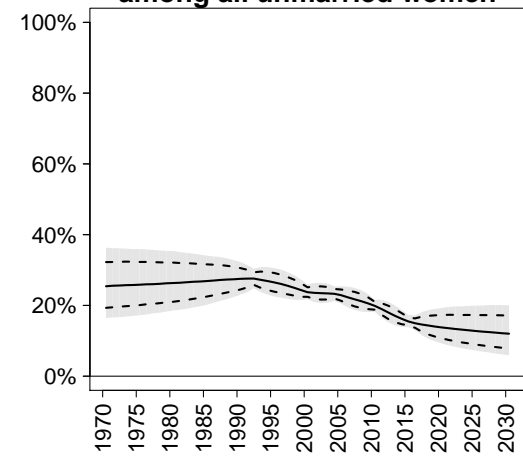

**Total demand**

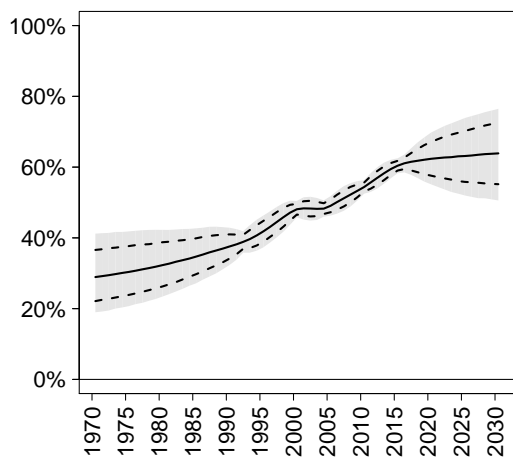

**Demand satisfied (any method)**

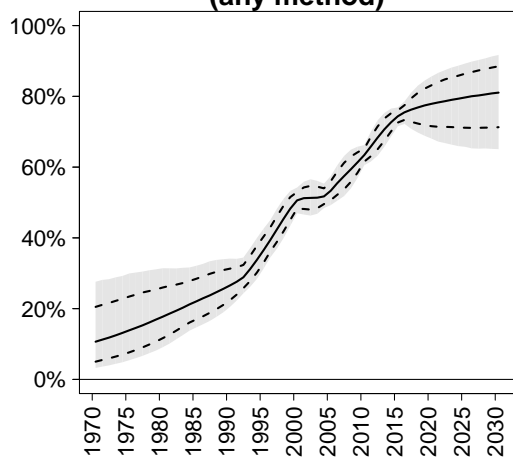

**Demand satisfied (modern methods)**

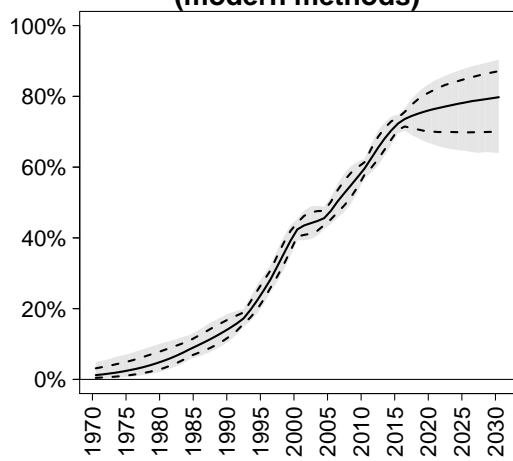

Malaysia --- All women

**CP (any)**

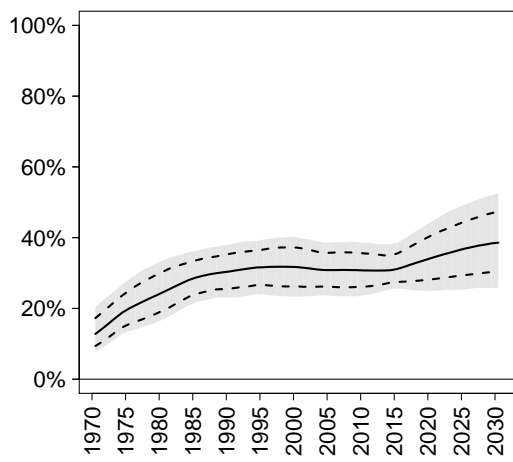

**CP (modern)**

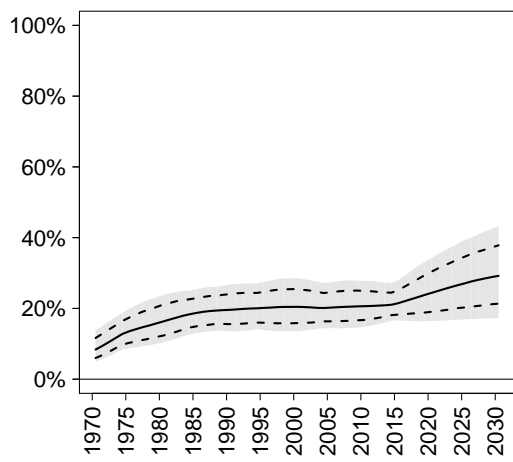

**CP (traditional)**

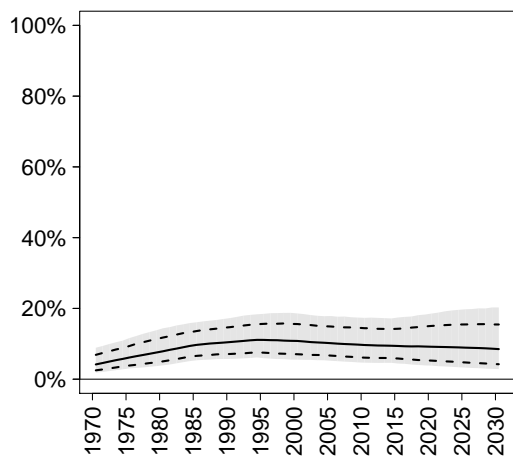

**Unmet need among all unmarried women**

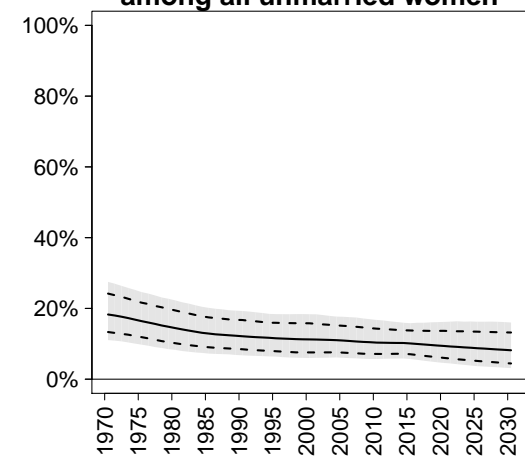

**Total demand**

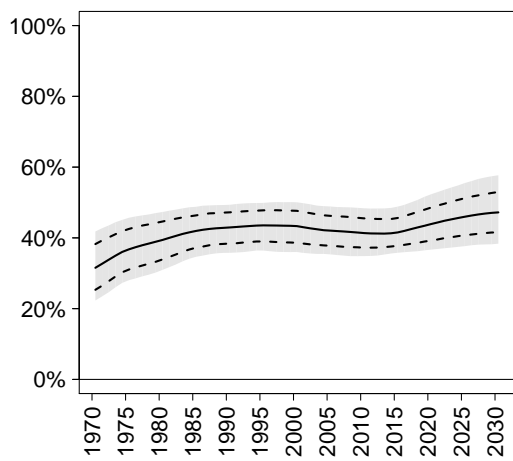

**Demand satisfied (any method)**

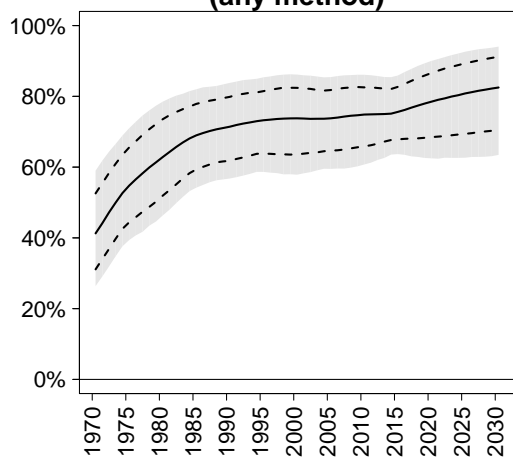

**Demand satisfied (modern methods)**

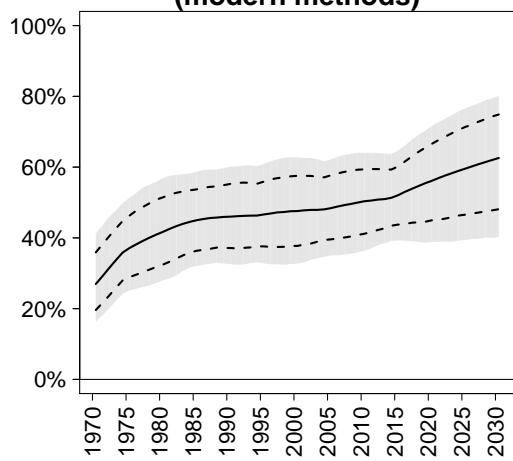

Maldives --- All women

CP (any)

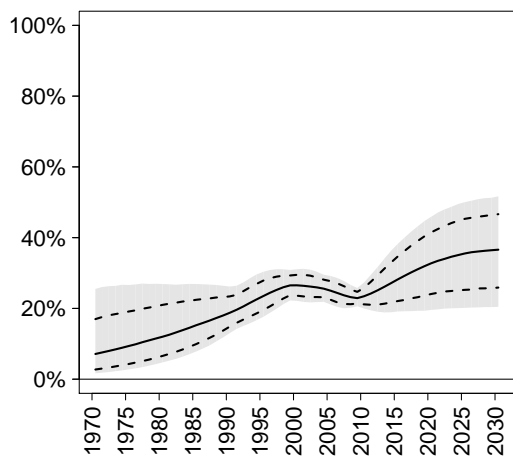

CP (modern)

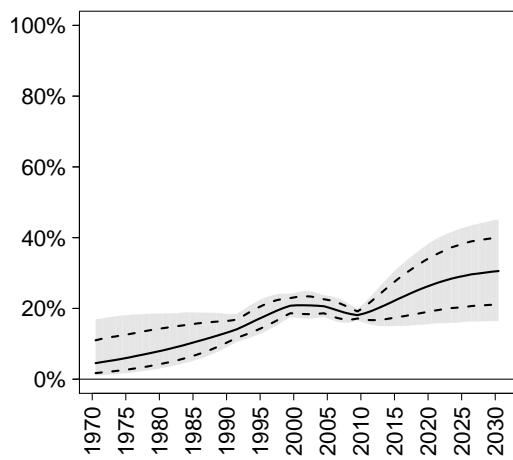

CP (traditional)

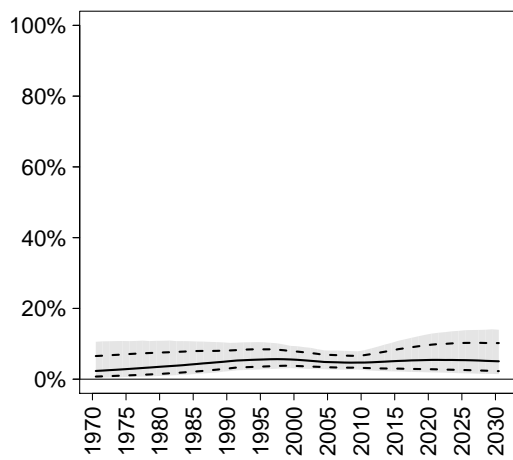

Unmet need among all unmarried women

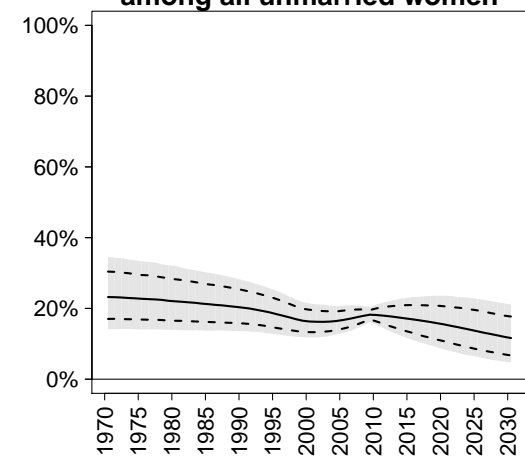

Total demand

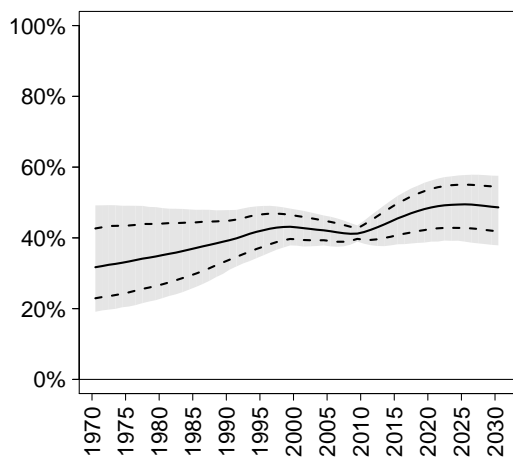

Mali --- All women

**CP (any)**

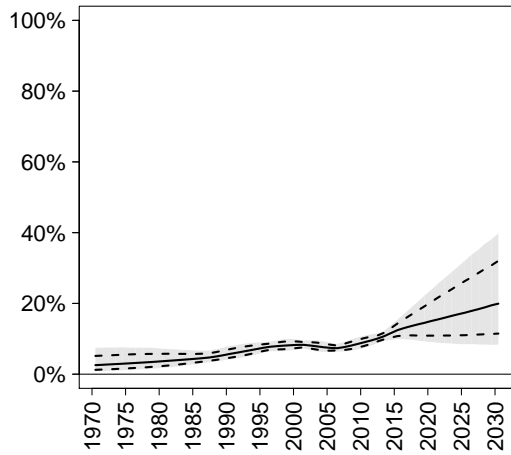

**CP (modern)**

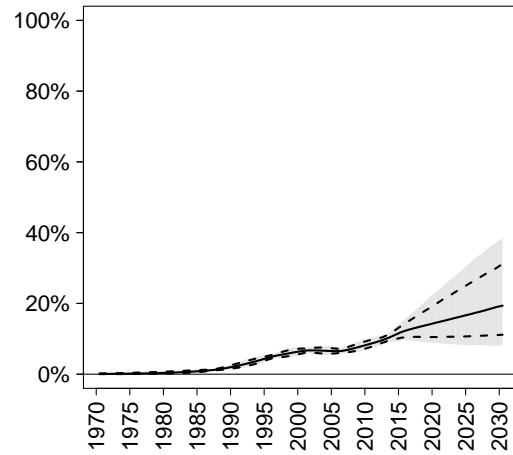

**CP (traditional)**

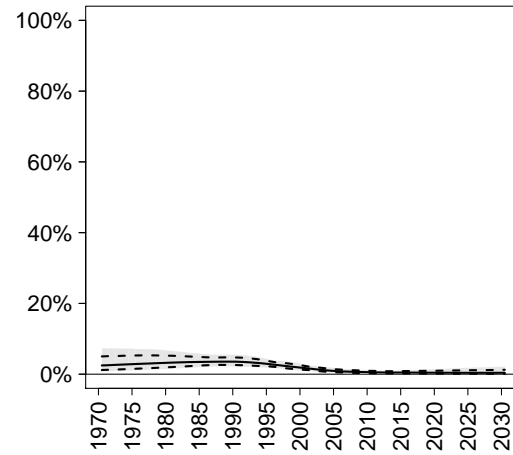

**Unmet need among all unmarried women**

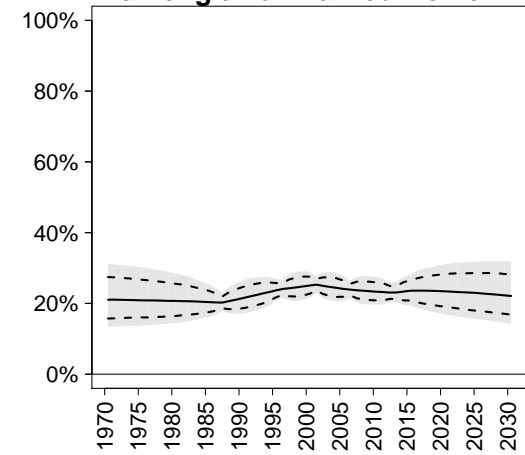

**Total demand**

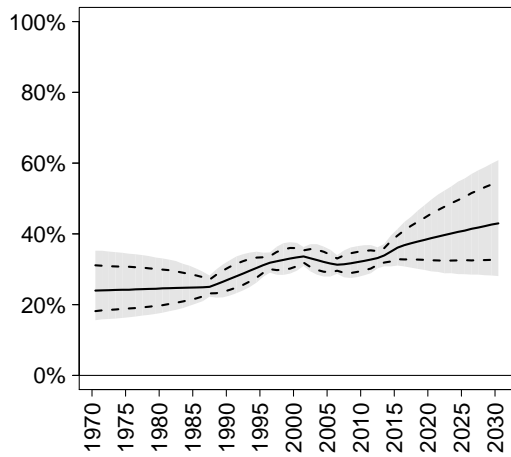

**Demand satisfied (any method)**

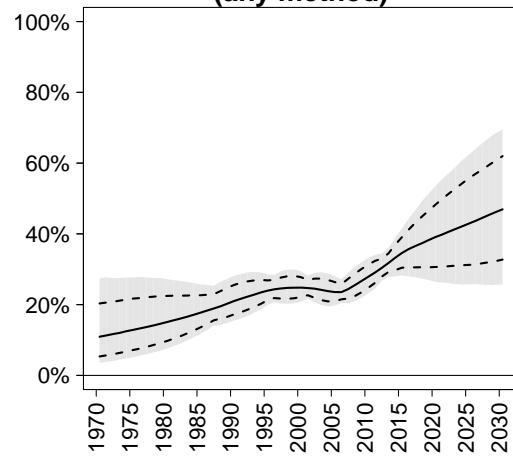

**Demand satisfied (modern methods)**

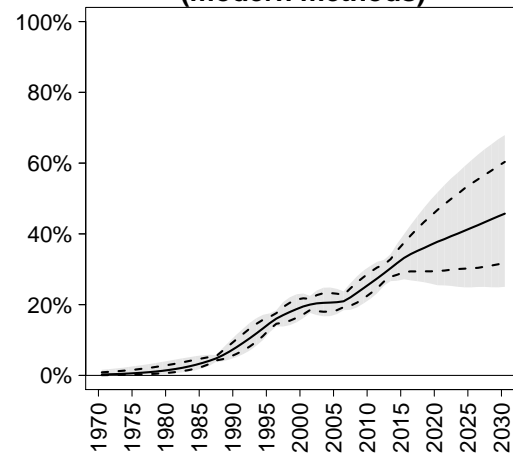



Malta --- All women

**CP (any)**

**CP (modern)**

**CP (traditional)**

**Unmet need among all unmarried women**

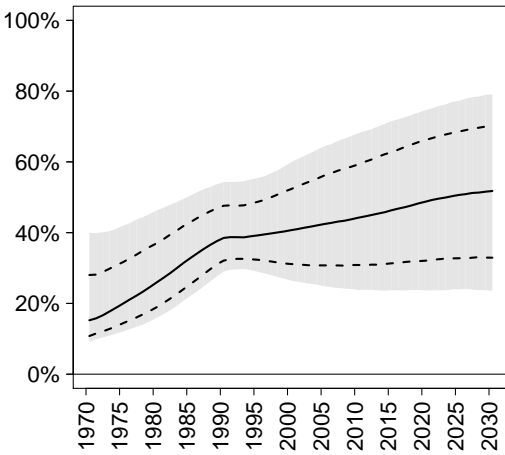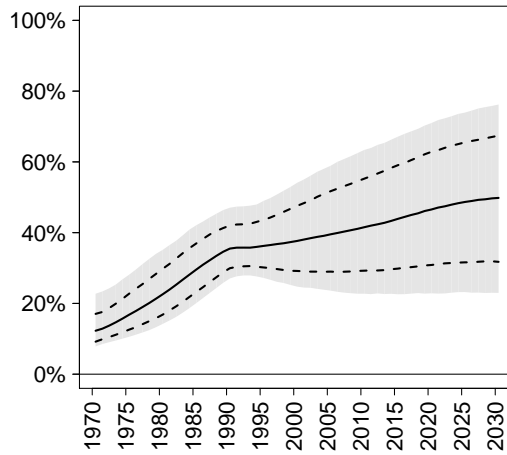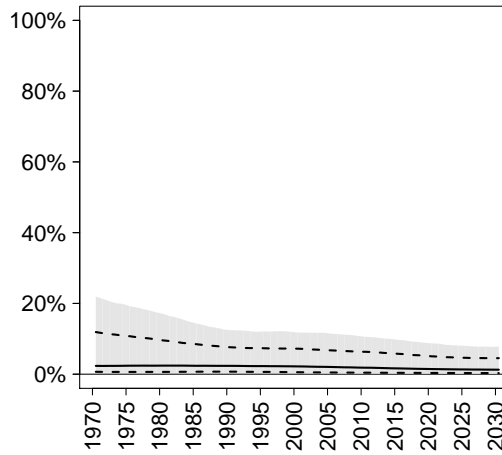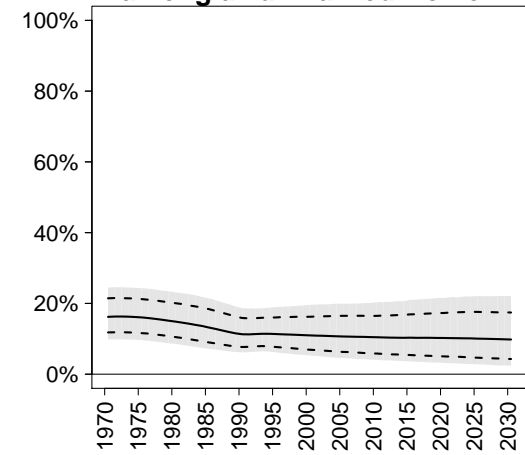

**Total demand**

**Demand satisfied (any method)**

**Demand satisfied (modern methods)**

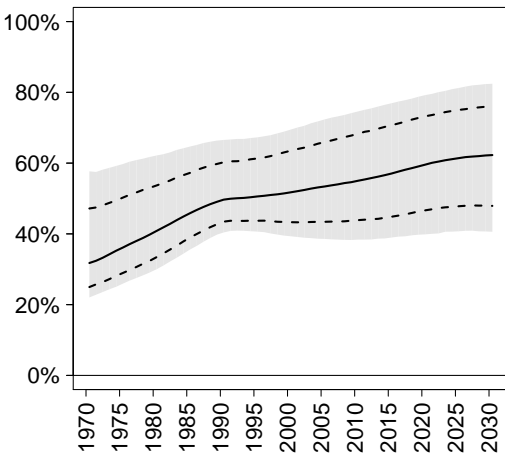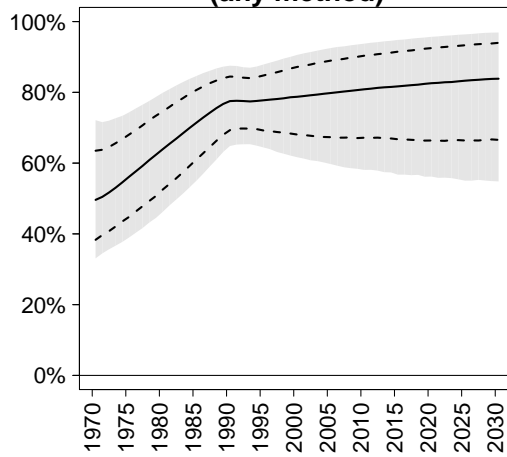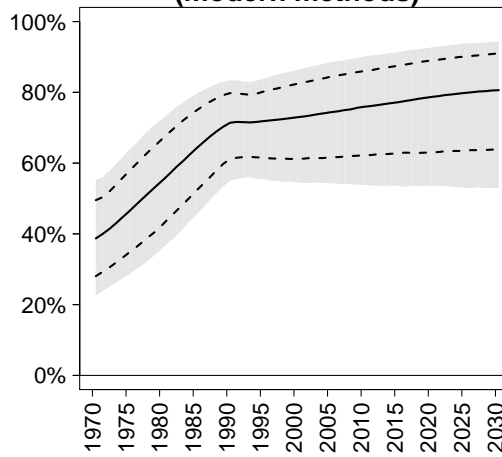

Martinique --- All women

**CP (any)**

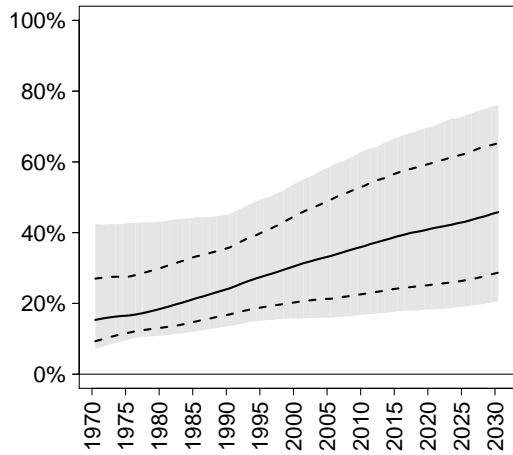

**CP (modern)**

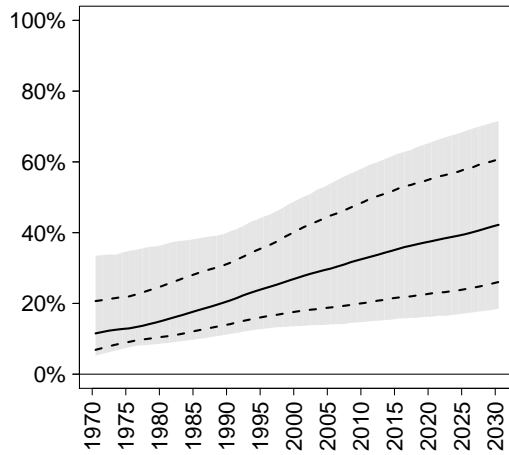

**CP (traditional)**

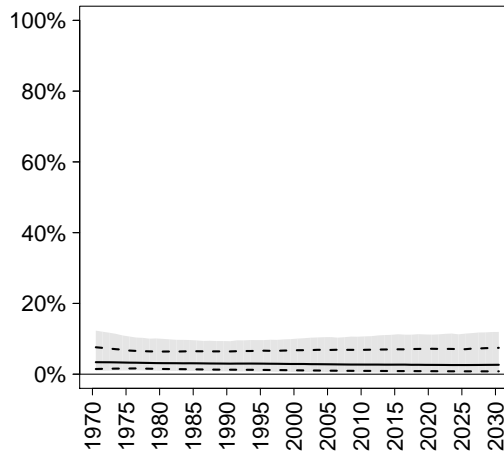

**Unmet need among all unmarried women**

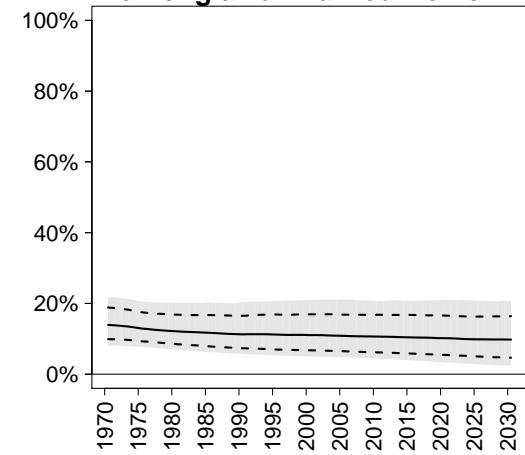

**Total demand**

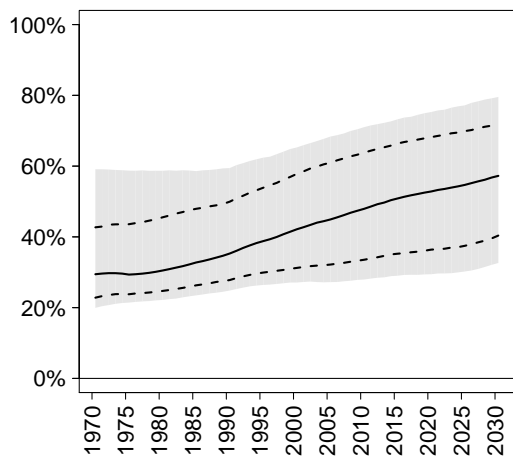

**Demand satisfied (any method)**

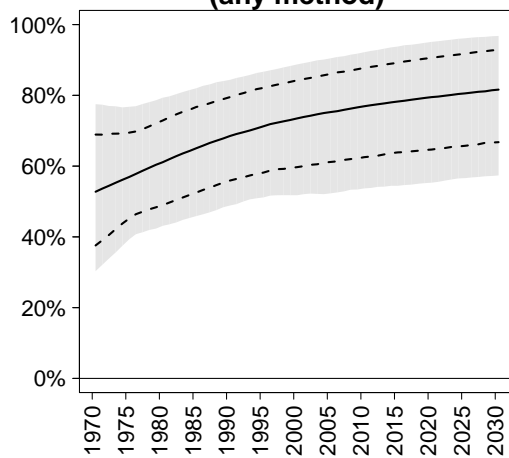

**Demand satisfied (modern methods)**

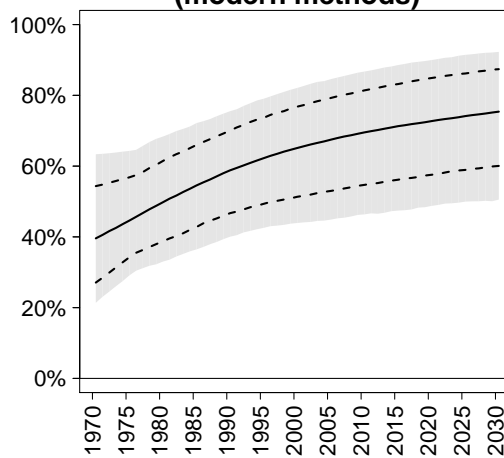

Mauritania --- All women

**CP (any)**

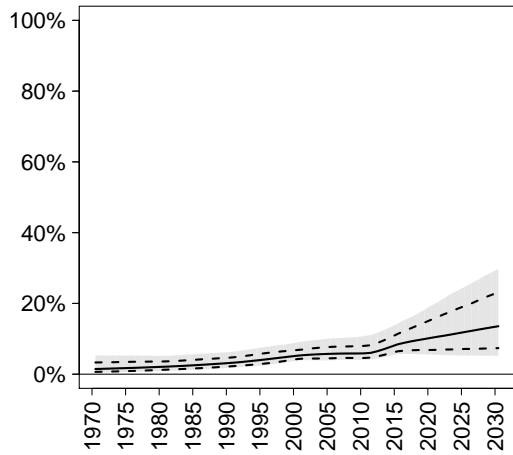

**CP (modern)**

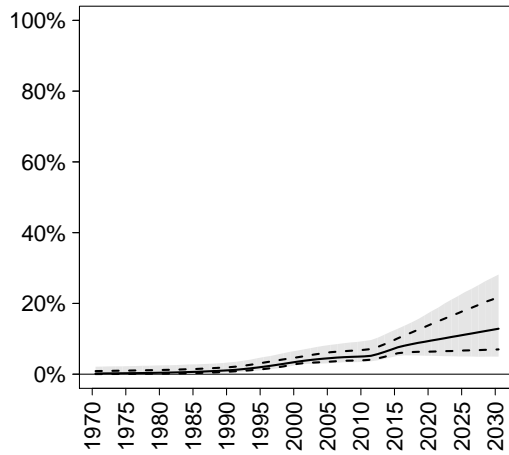

**CP (traditional)**

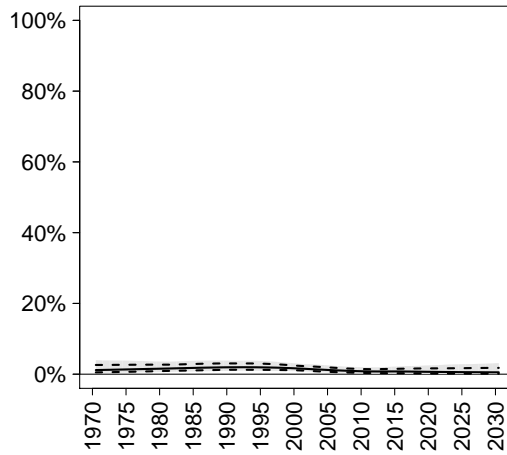

**Unmet need among all unmarried women**

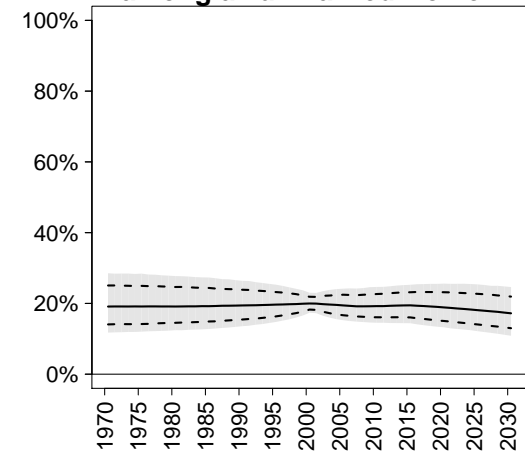

**Total demand**

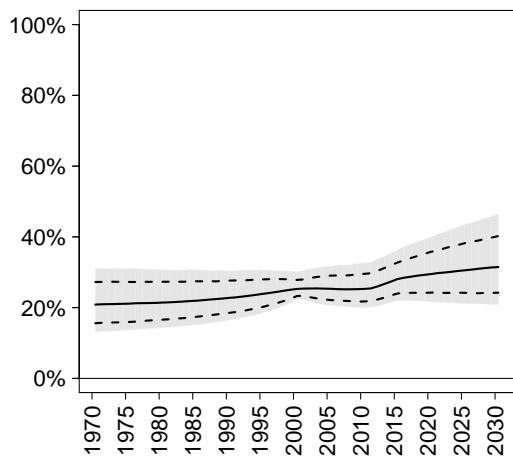

**Demand satisfied (any method)**

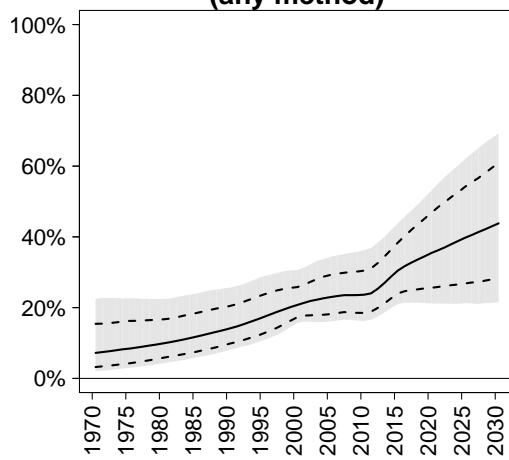

**Demand satisfied (modern methods)**

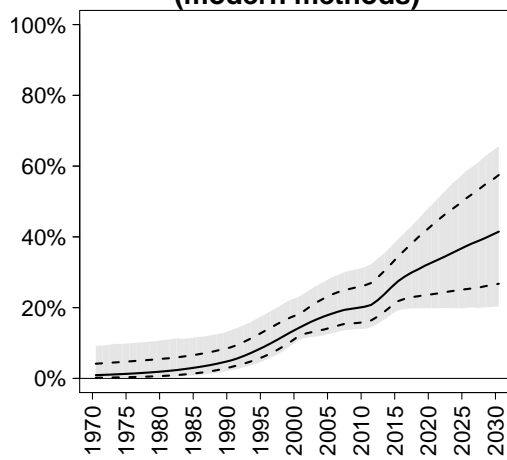

Mauritius --- All women

**CP (any)**

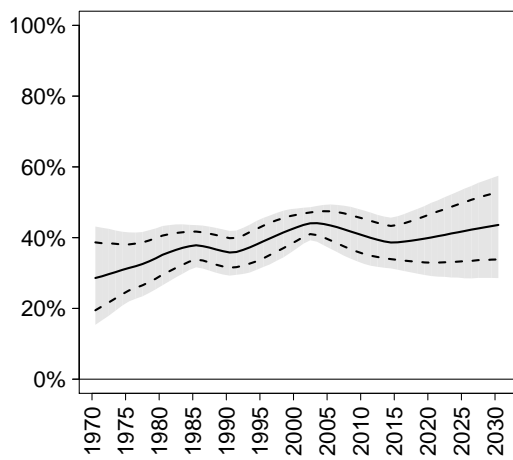

**CP (modern)**

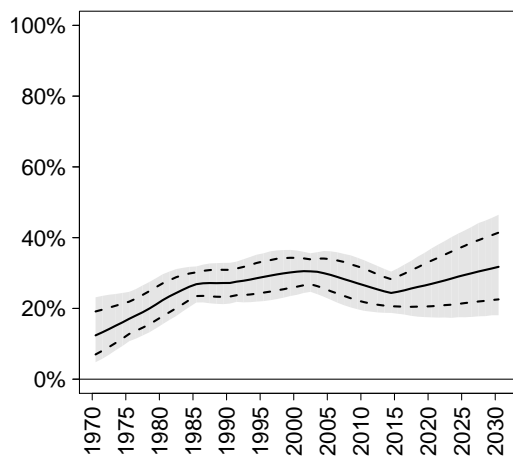

**CP (traditional)**

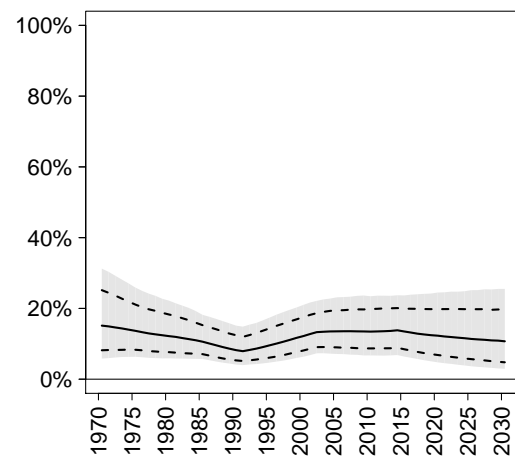

**Unmet need among all unmarried women**

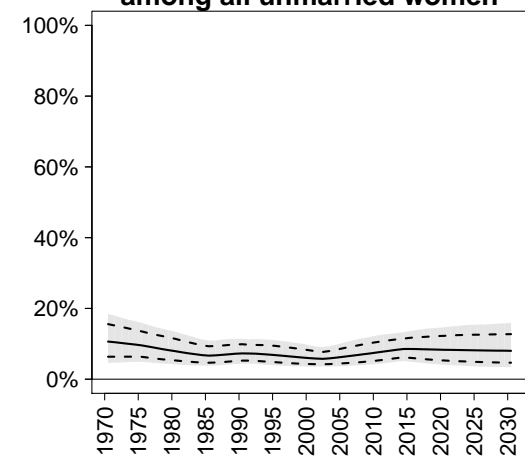

**Total demand**

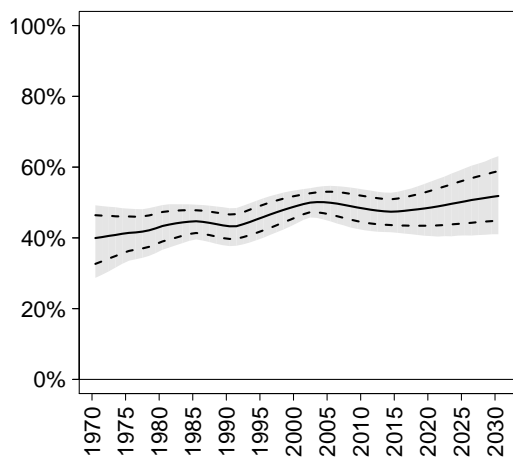

**Demand satisfied (any method)**

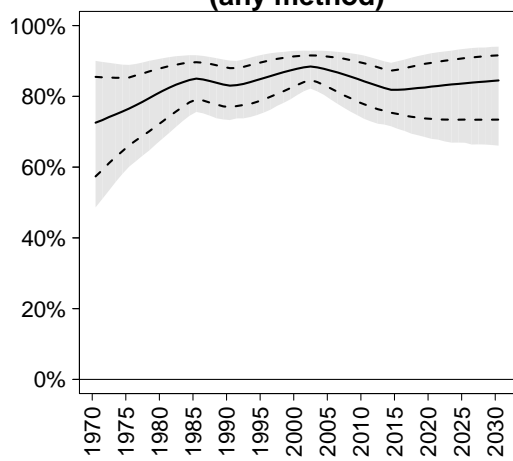

**Demand satisfied (modern methods)**

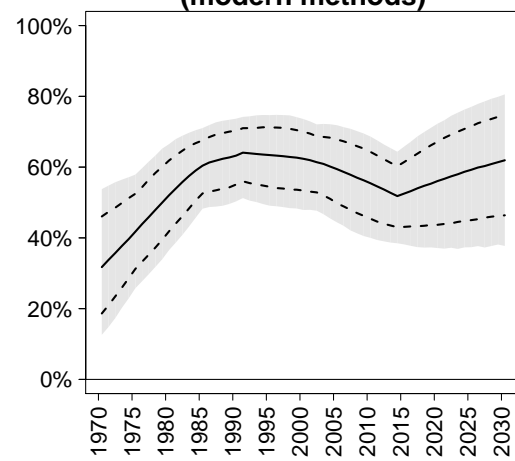

Mexico --- All women

**CP (any)**

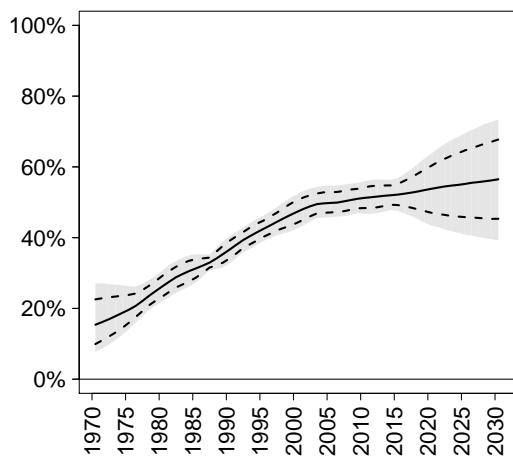

**CP (modern)**

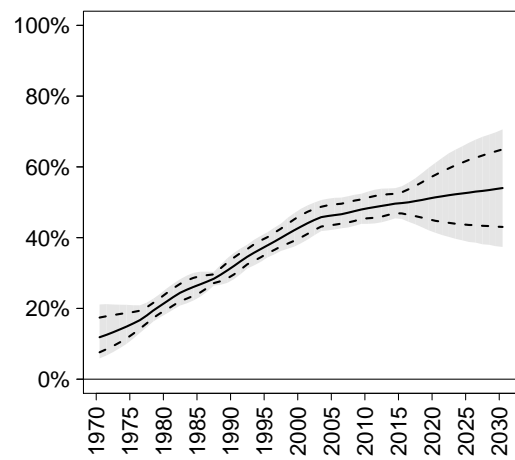

**CP (traditional)**

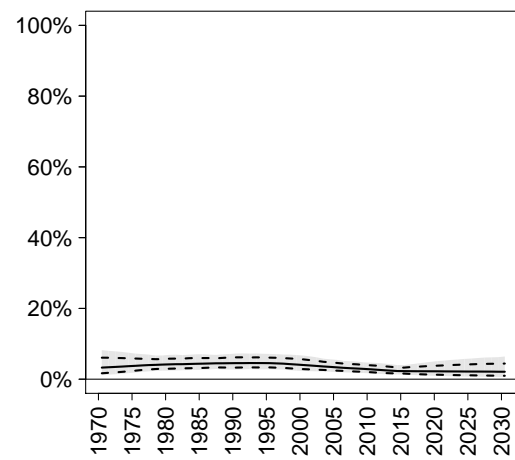

**Unmet need among all unmarried women**

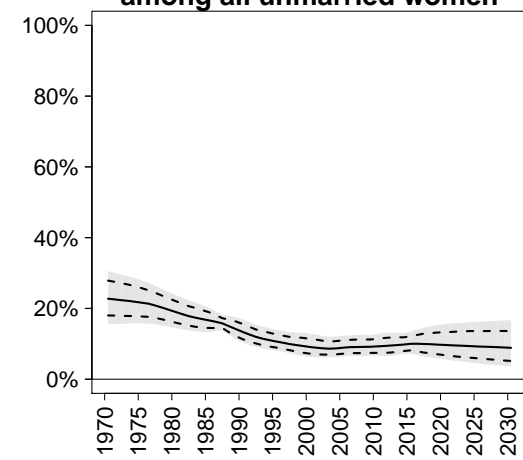

**Total demand**

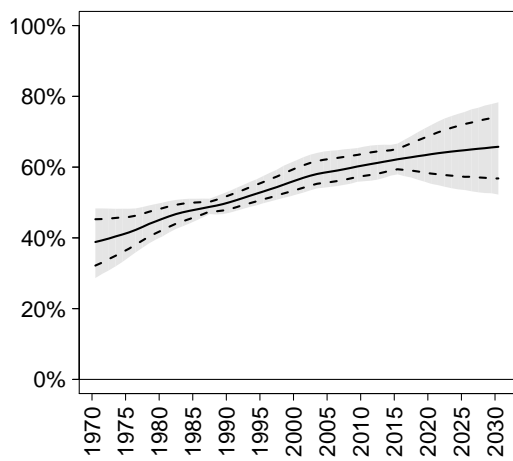

Mongolia --- All women

**CP (any)**

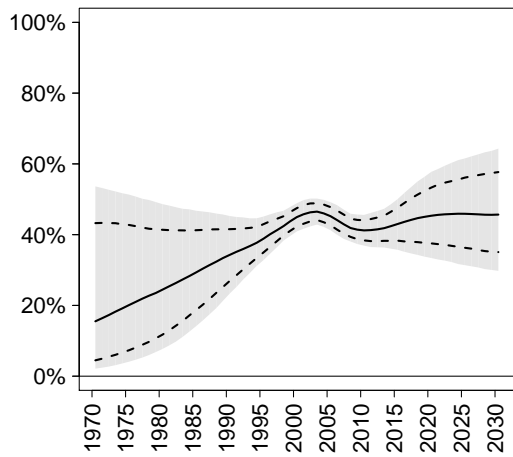

**CP (modern)**

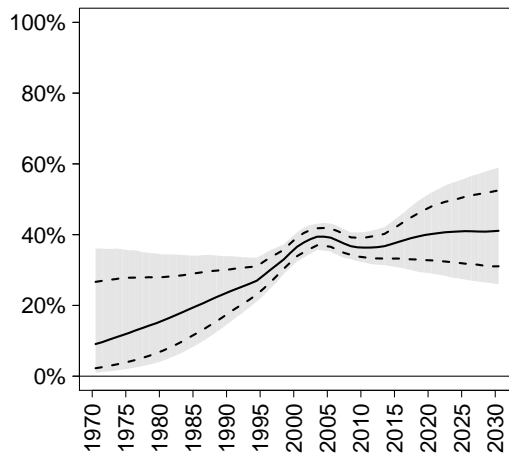

**CP (traditional)**

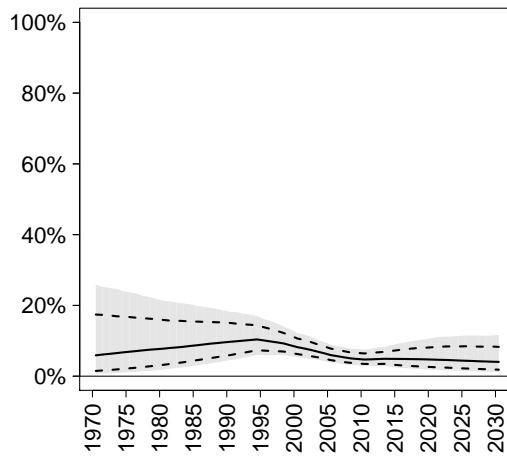

**Unmet need among all unmarried women**

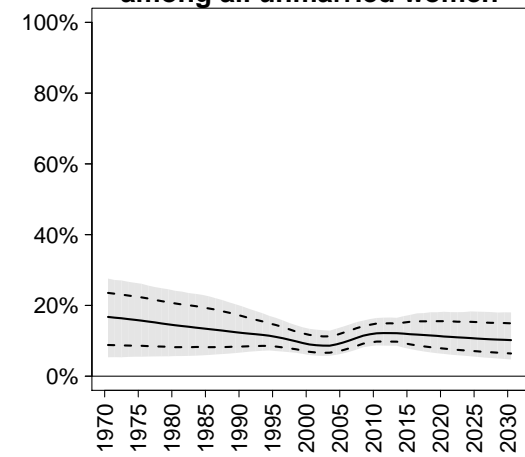

**Total demand**

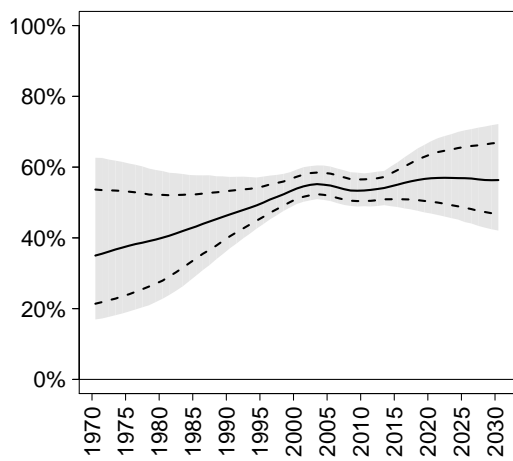

**Demand satisfied (any method)**

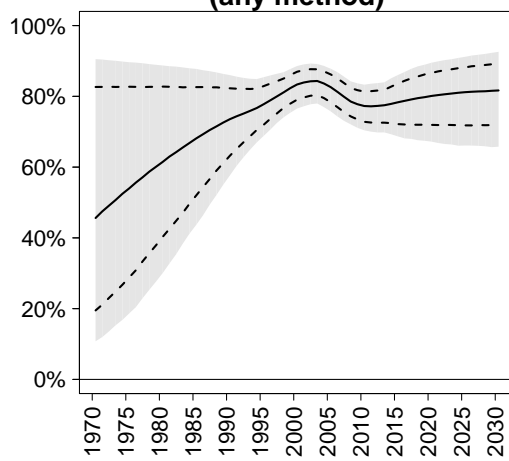

**Demand satisfied (modern methods)**

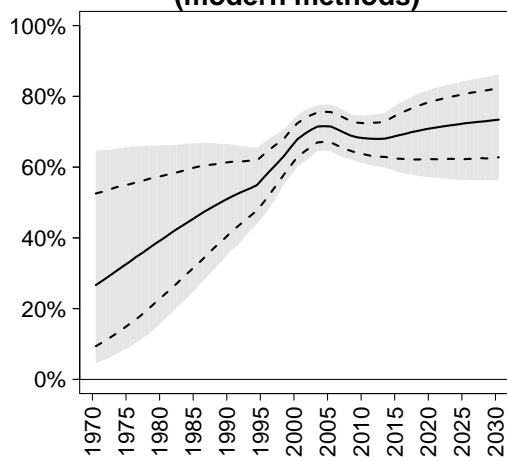

Montenegro --- All women

**CP (any)**

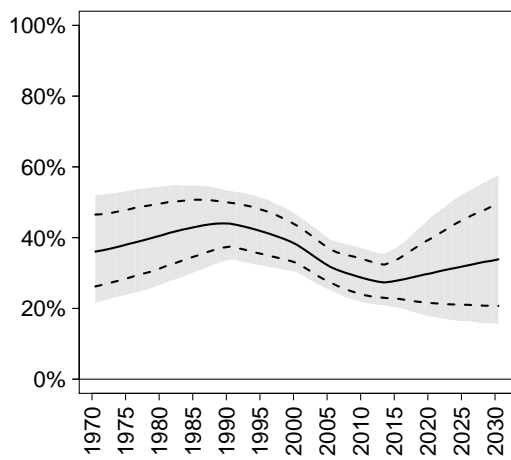

**CP (modern)**

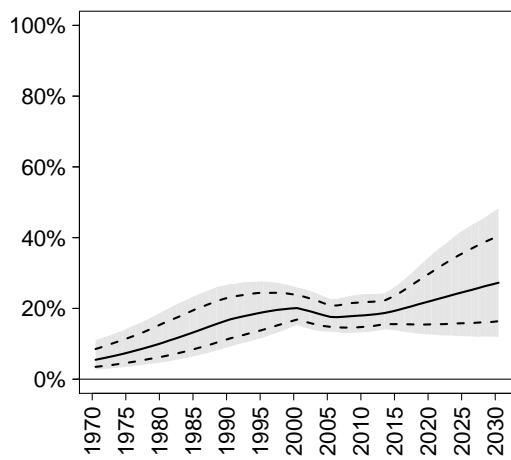

**CP (traditional)**

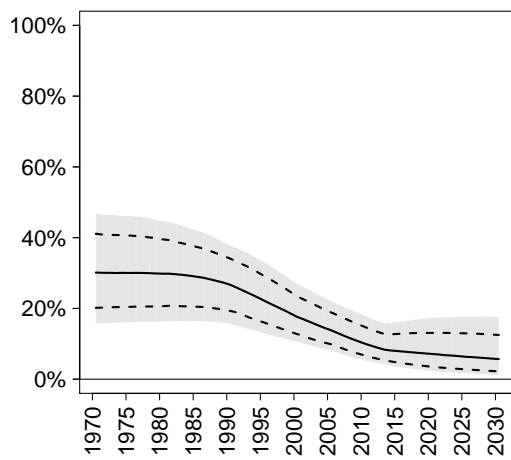

**Unmet need among all unmarried women**

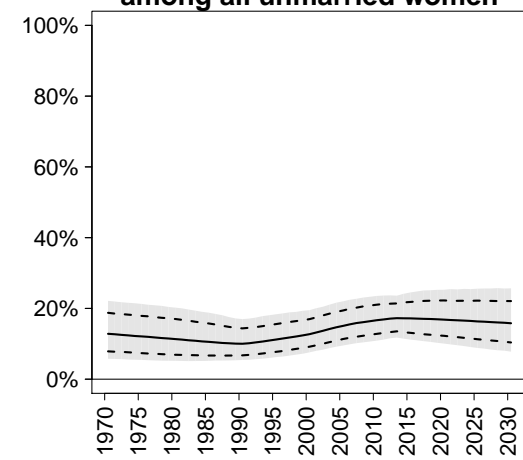

**Total demand**

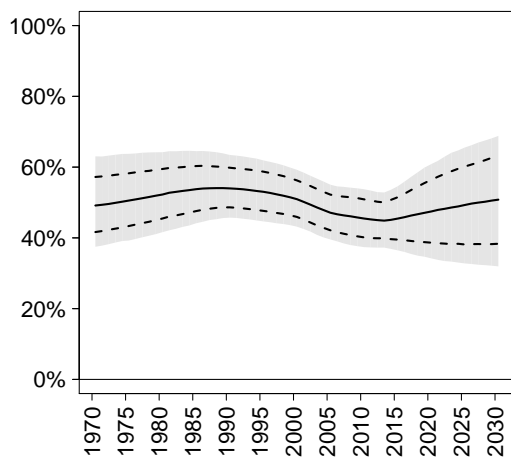

**Demand satisfied (any method)**

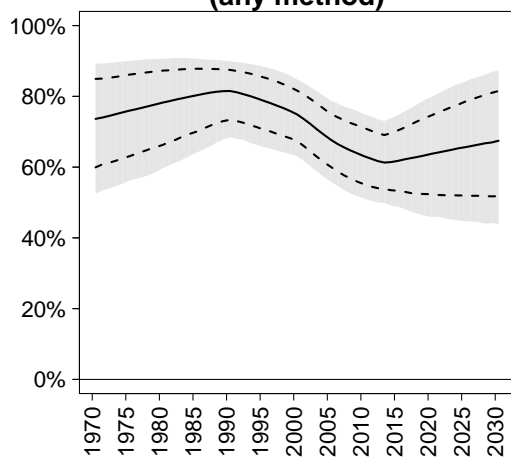

**Demand satisfied (modern methods)**

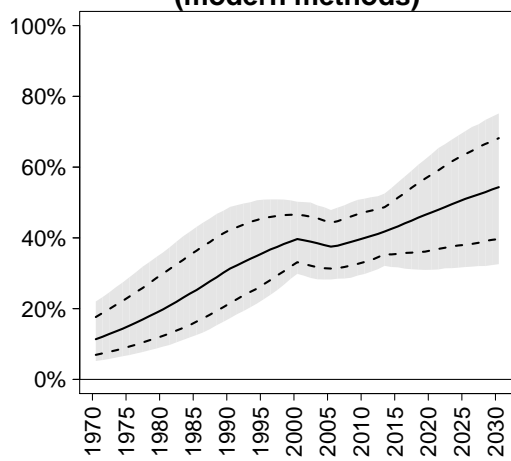

Morocco --- All women

**CP (any)**

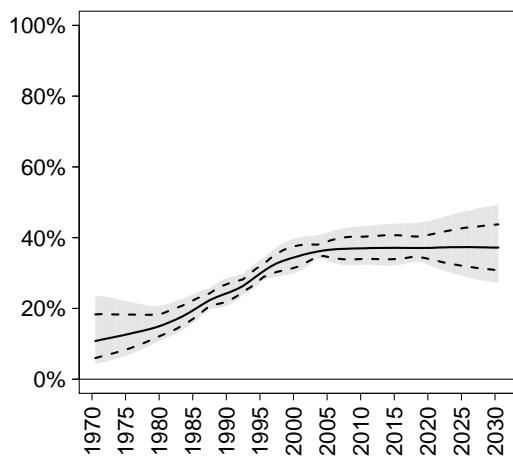

**CP (modern)**

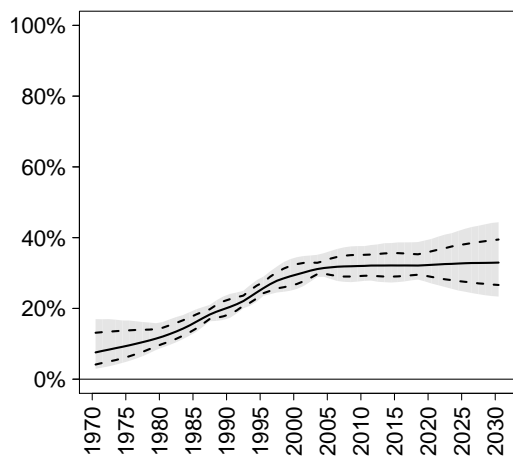

**CP (traditional)**

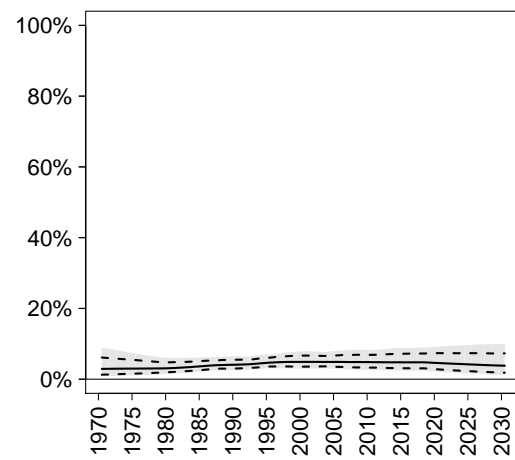

**Unmet need among all unmarried women**

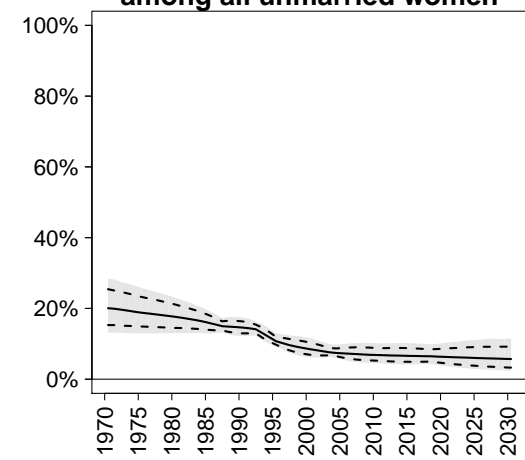

**Total demand**

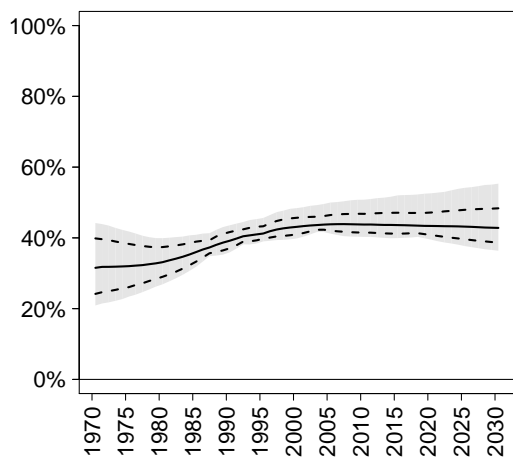

**Demand satisfied (any method)**

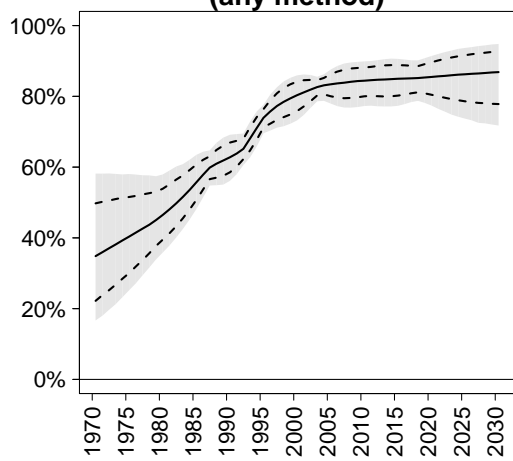

**Demand satisfied (modern methods)**

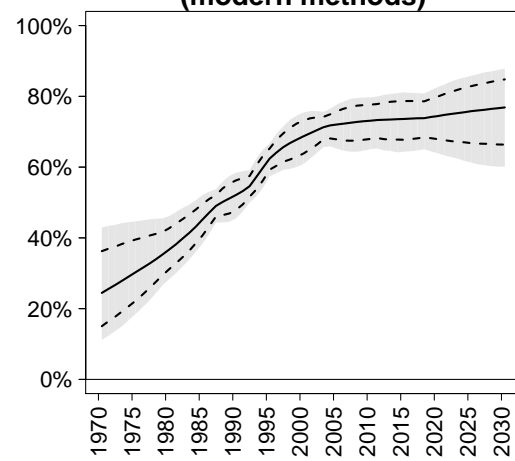



Mozambique --- All women

**CP (any)**

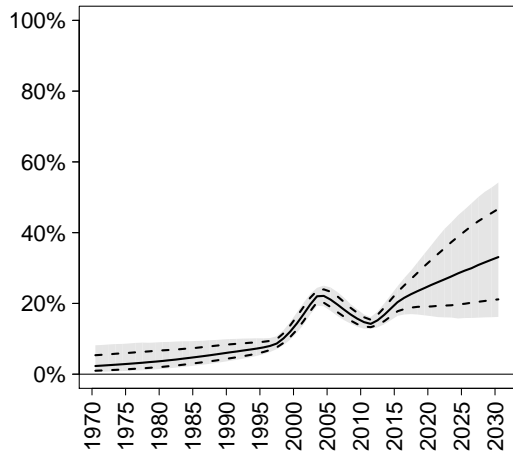

**CP (modern)**

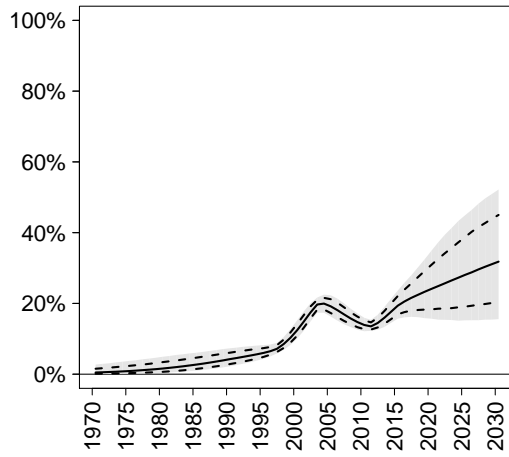

**CP (traditional)**

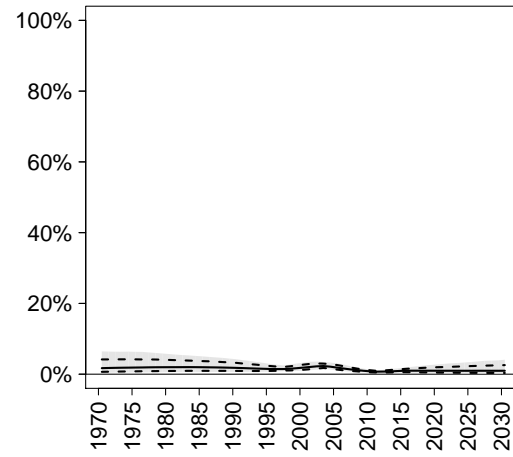

**Unmet need among all unmarried women**

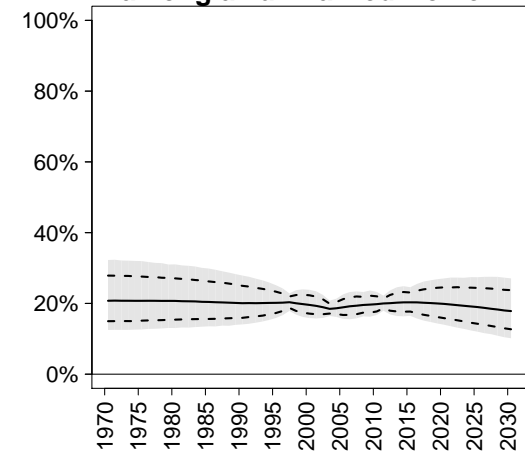

**Total demand**

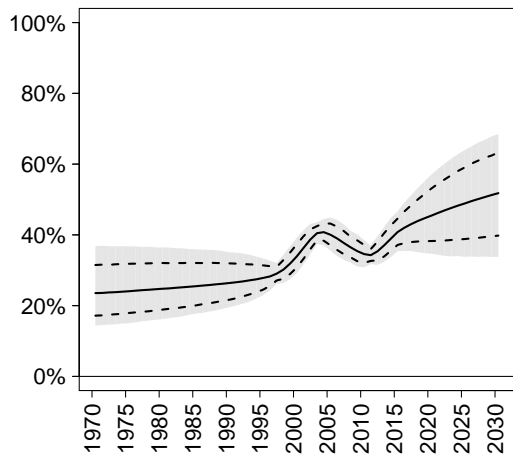

**Demand satisfied (any method)**

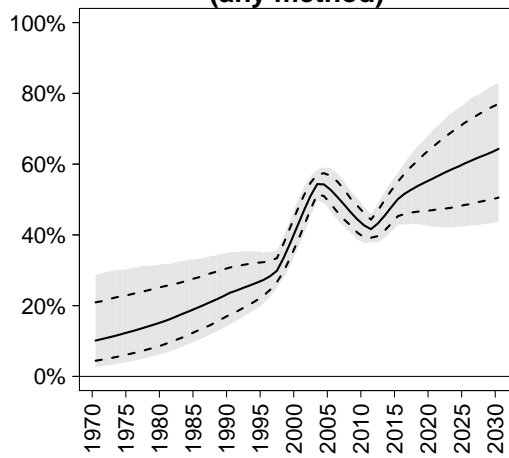

**Demand satisfied (modern methods)**

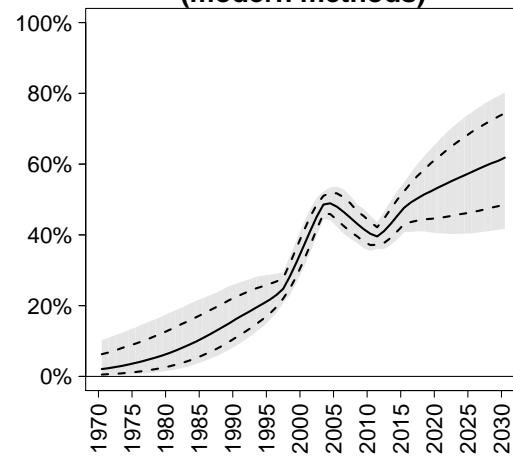

Myanmar --- All women

**CP (any)**

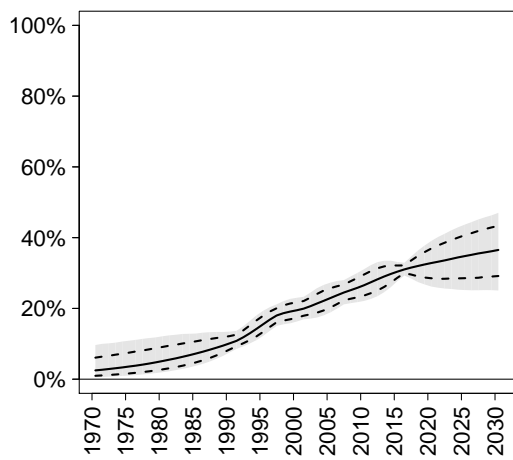

**CP (modern)**

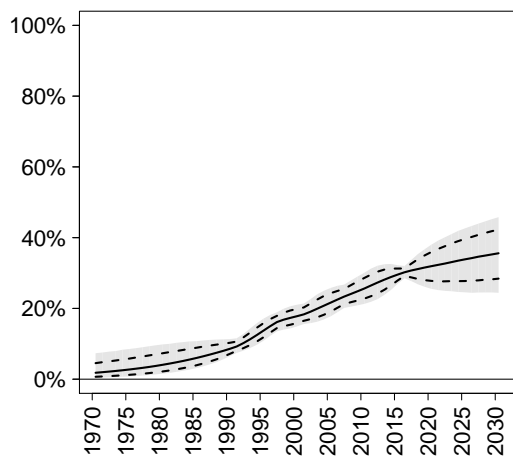

**CP (traditional)**

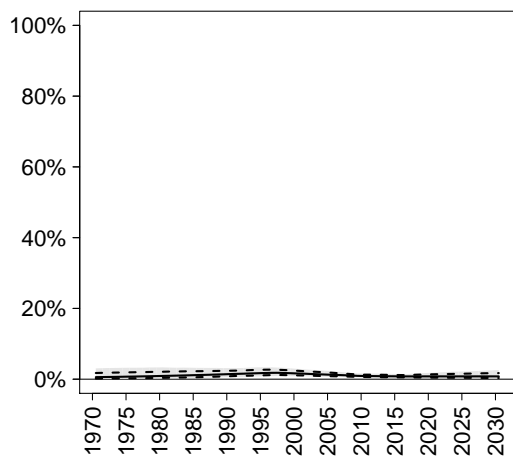

**Unmet need among all unmarried women**

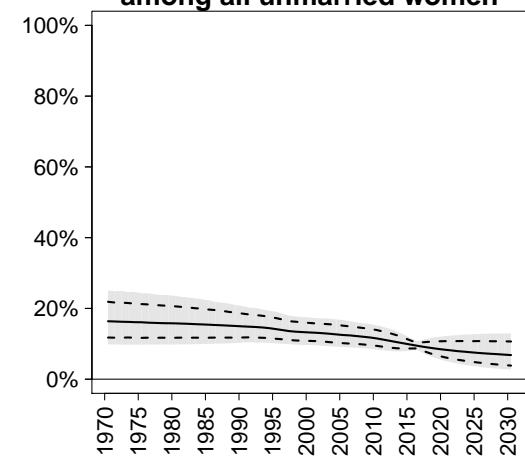

**Total demand**

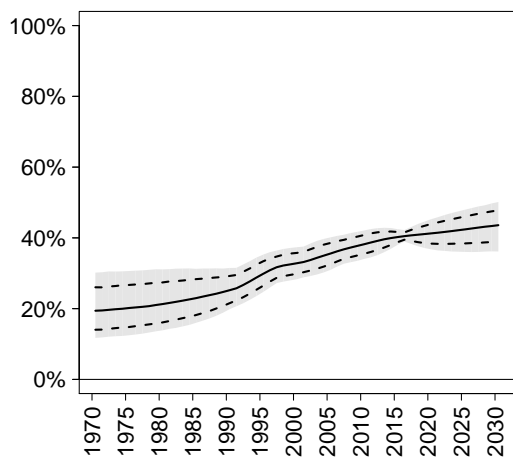

**Demand satisfied (any method)**

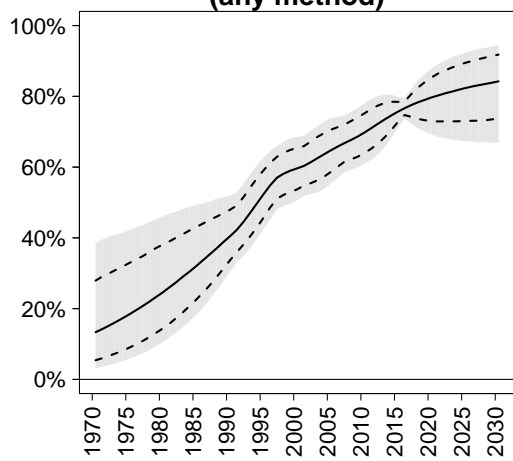

**Demand satisfied (modern methods)**

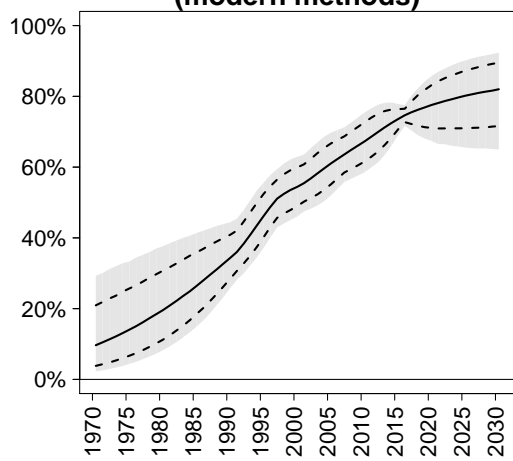

Namibia --- All women

**CP (any)**

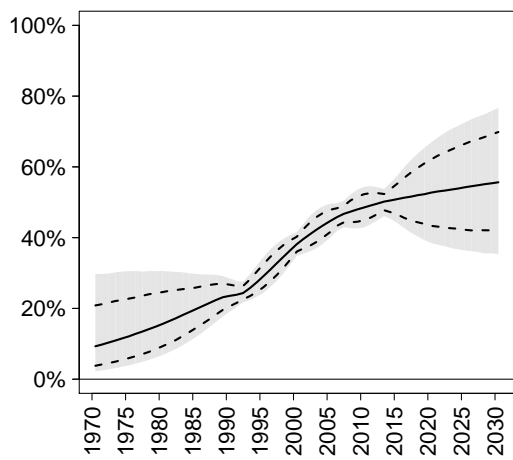

**CP (modern)**

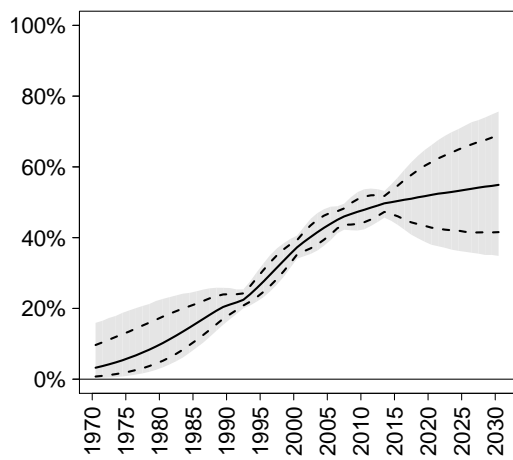

**CP (traditional)**

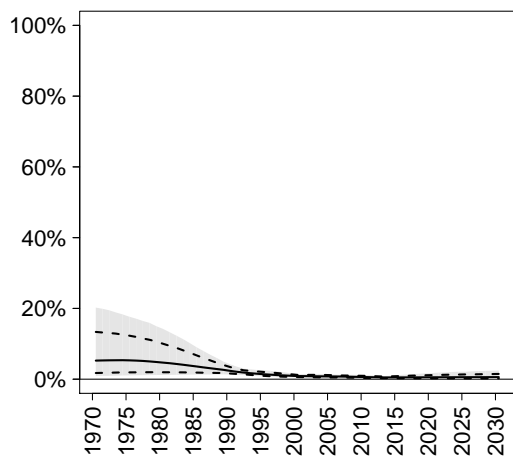

**Unmet need among all unmarried women**

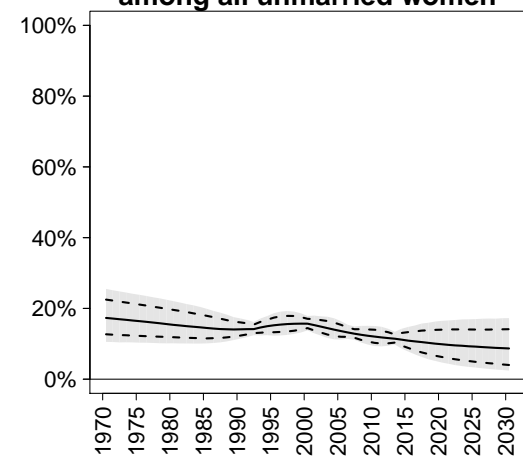

**Total demand**

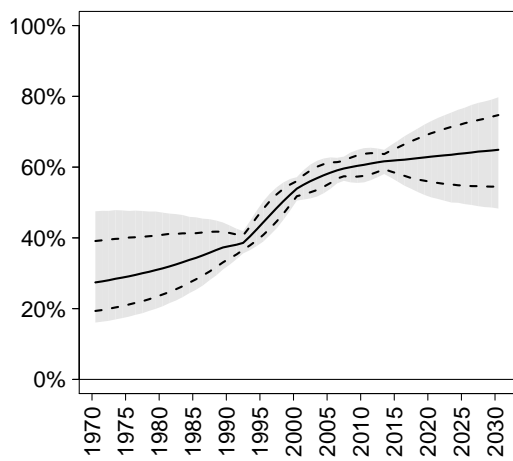

**Demand satisfied (any method)**

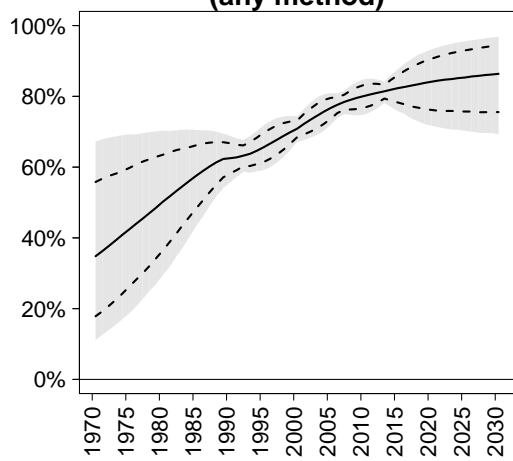

**Demand satisfied (modern methods)**

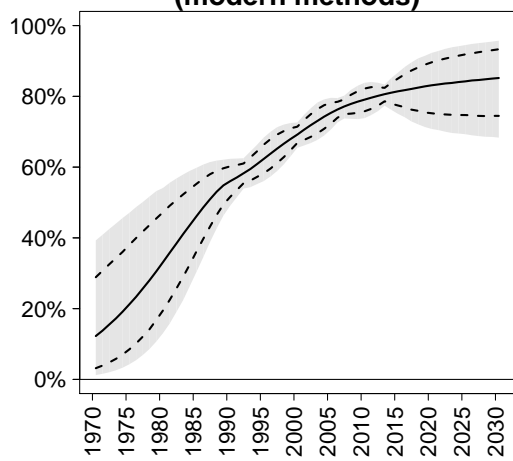

Nepal --- All women

**CP (any)**

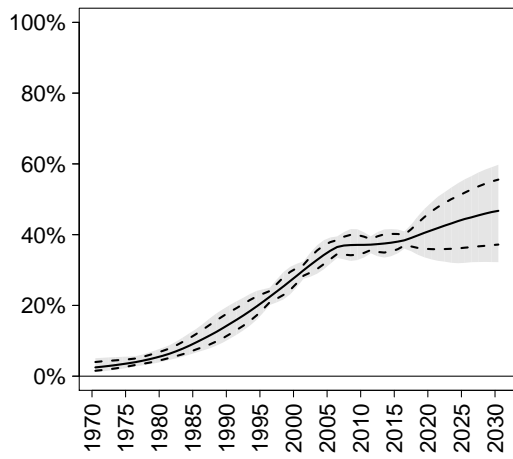

**CP (modern)**

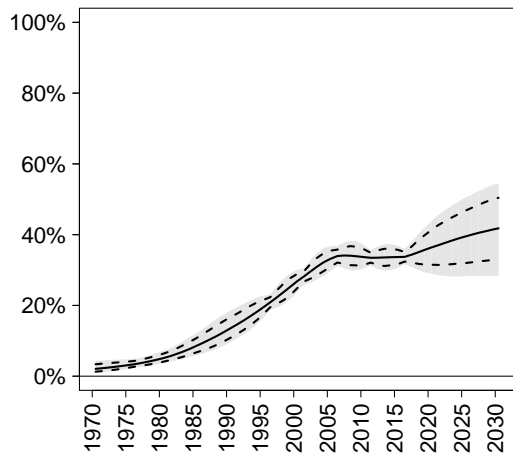

**CP (traditional)**

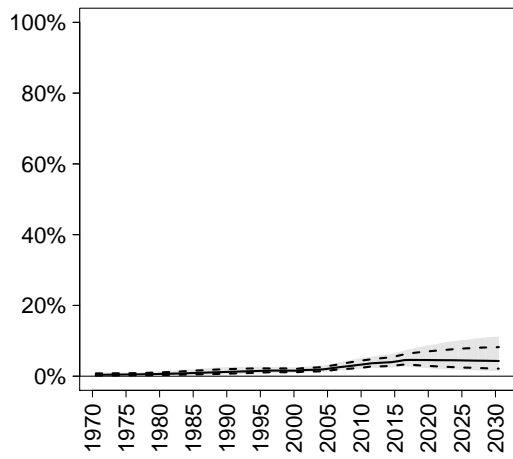

**Unmet need among all unmarried women**

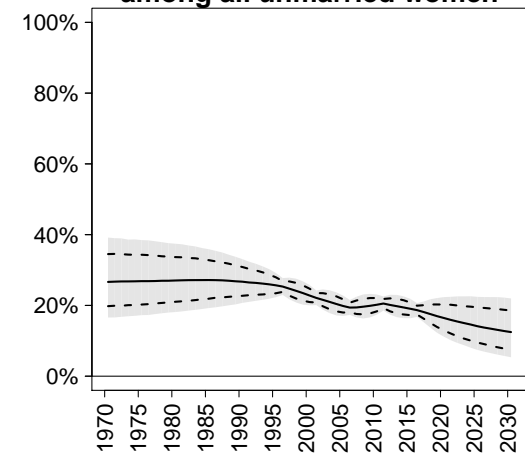

**Total demand**

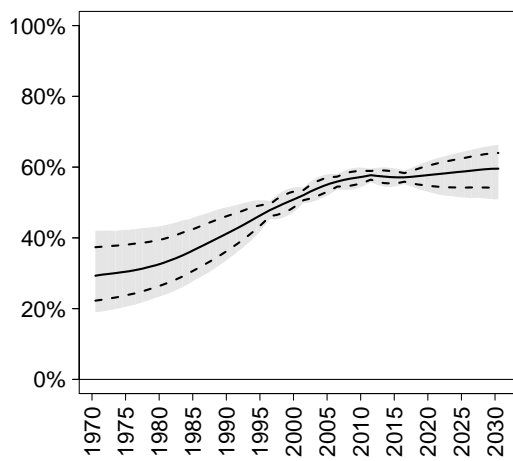

**Demand satisfied (any method)**

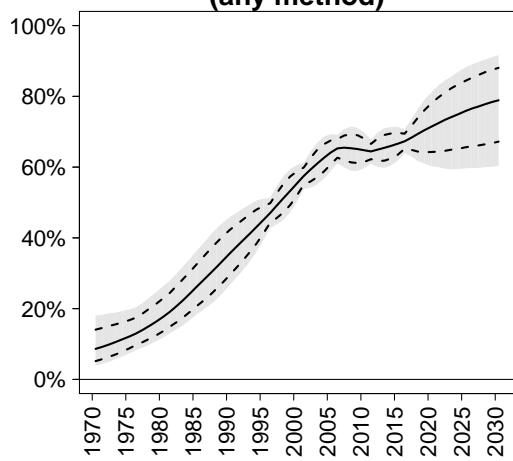

**Demand satisfied (modern methods)**

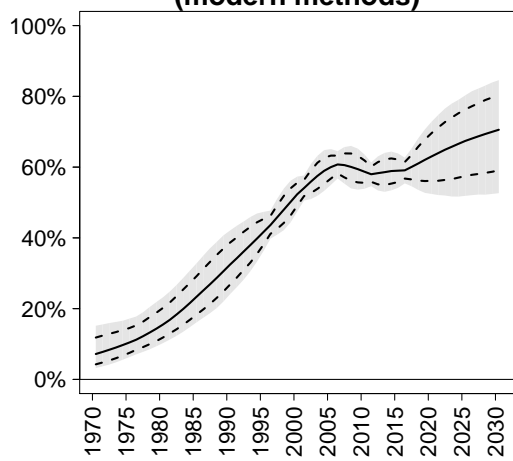

Netherlands --- All women

**CP (any)**

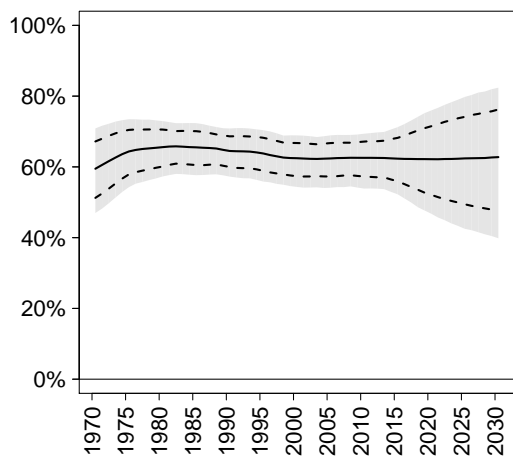

**CP (modern)**

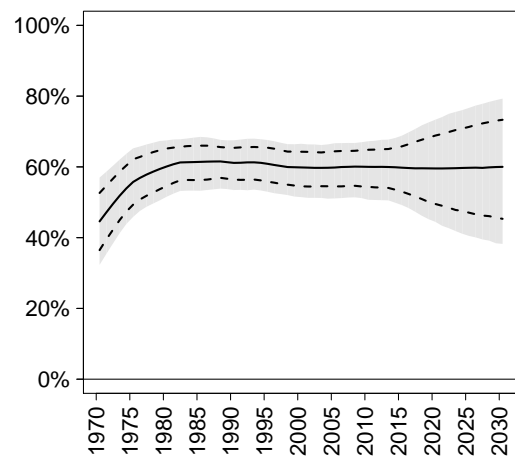

**CP (traditional)**

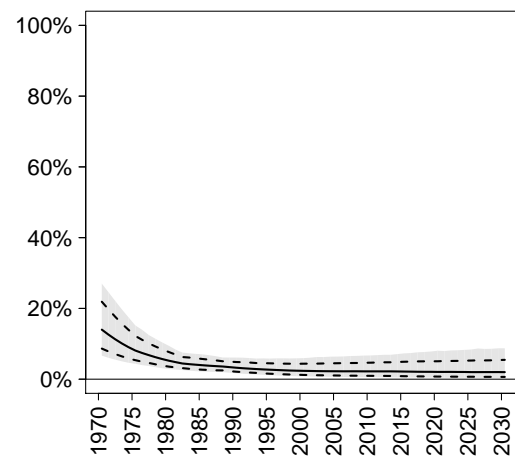

**Unmet need among all unmarried women**

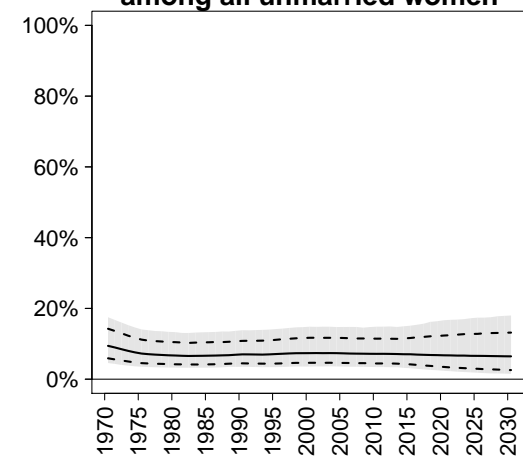

**Total demand**

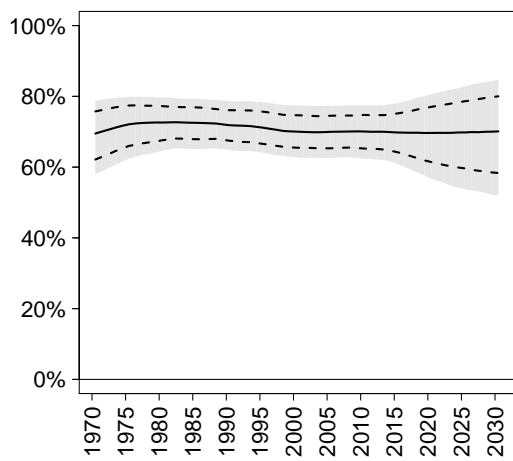

New Zealand --- All women

**CP (any)**

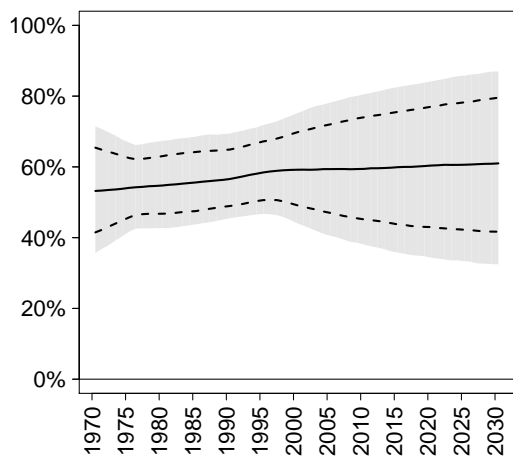

**CP (modern)**

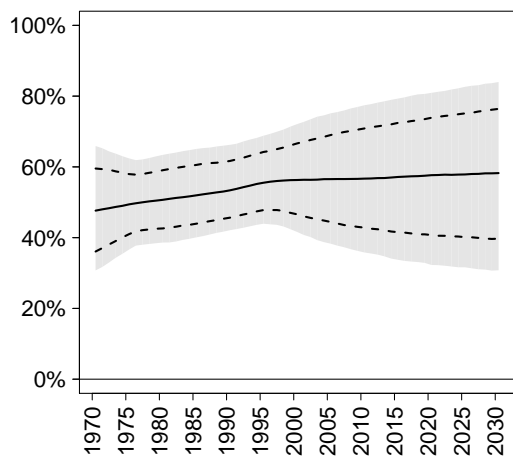

**CP (traditional)**

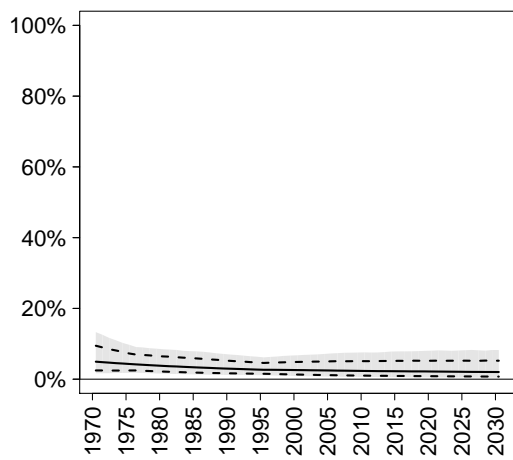

**Unmet need among all unmarried women**

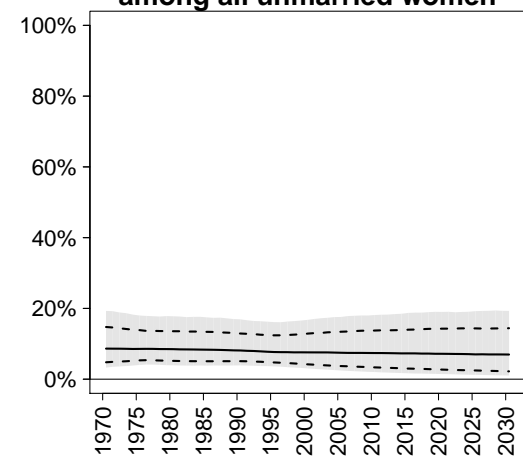

**Total demand**

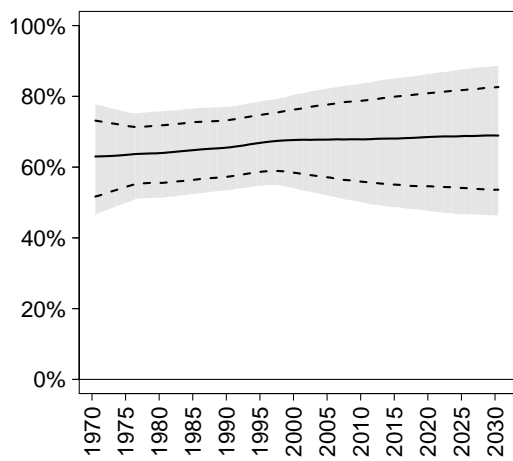

**Demand satisfied (any method)**

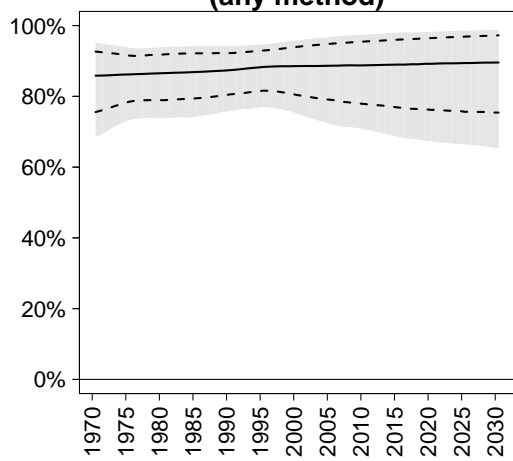

**Demand satisfied (modern methods)**

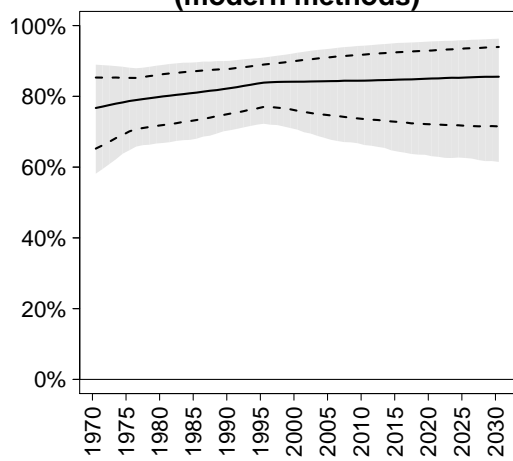

Nicaragua --- All women

**CP (any)**

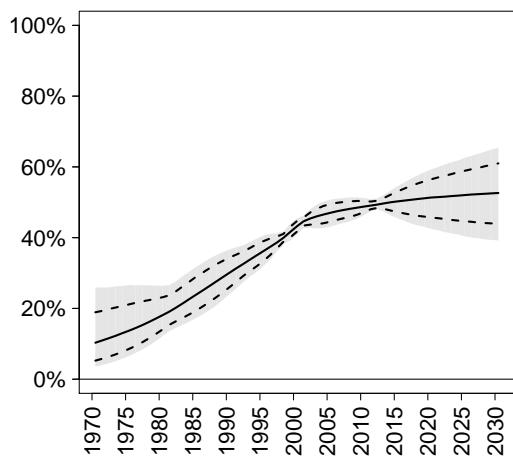

**CP (modern)**

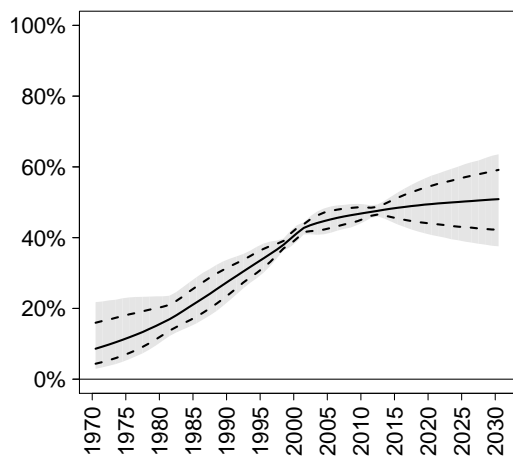

**CP (traditional)**

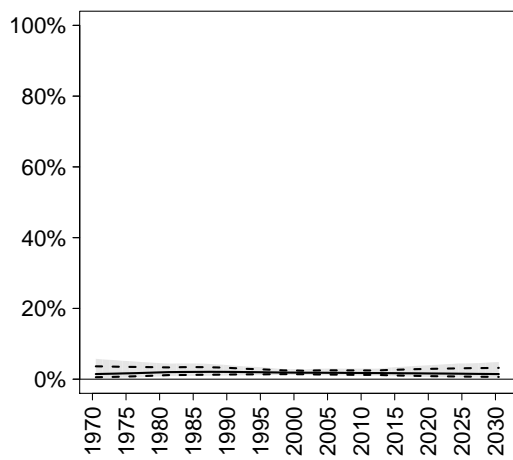

**Unmet need among all unmarried women**

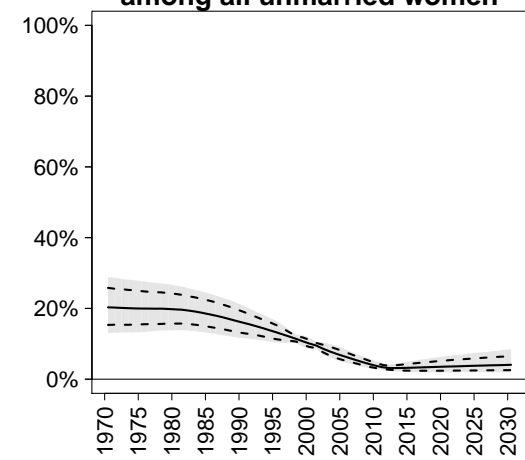

**Total demand**

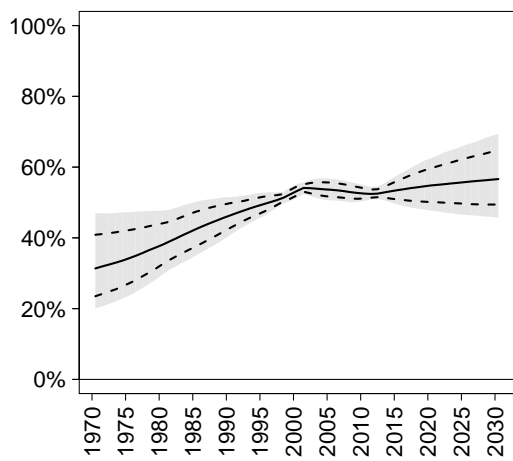

**Demand satisfied (any method)**

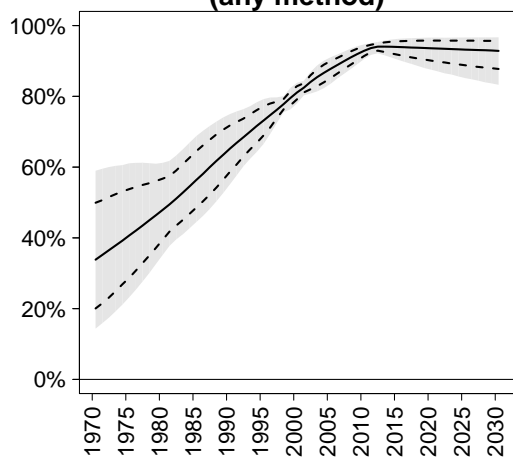

**Demand satisfied (modern methods)**

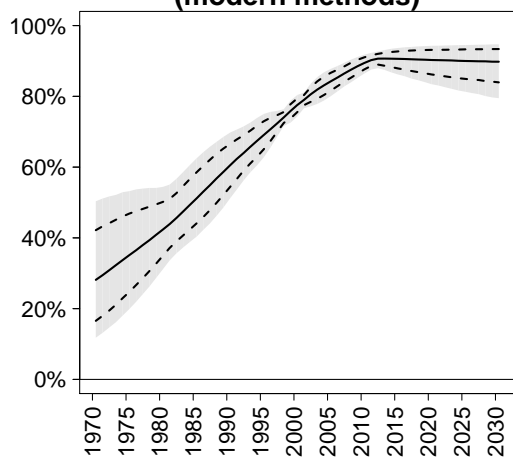

Niger --- All women

**CP (any)**

**CP (modern)**

**CP (traditional)**

**Unmet need among all unmarried women**

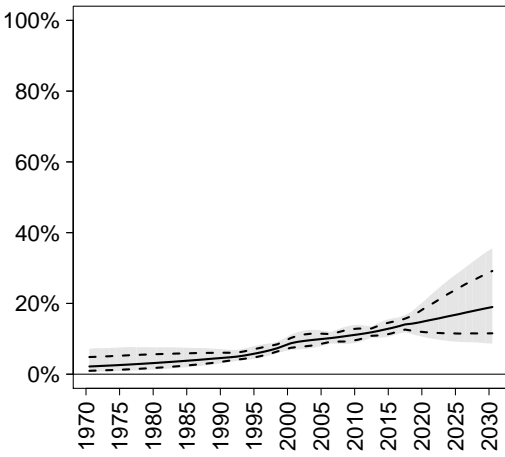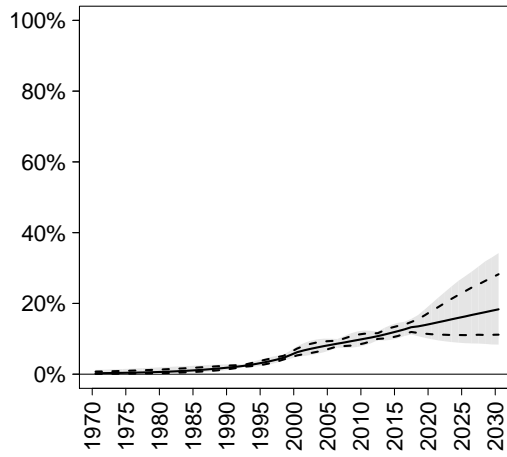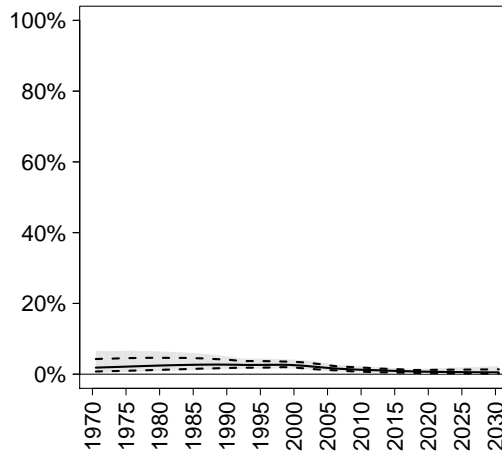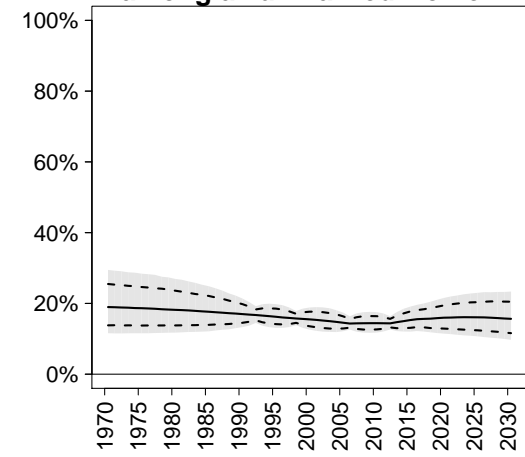

**Total demand**

**Demand satisfied (any method)**

**Demand satisfied (modern methods)**

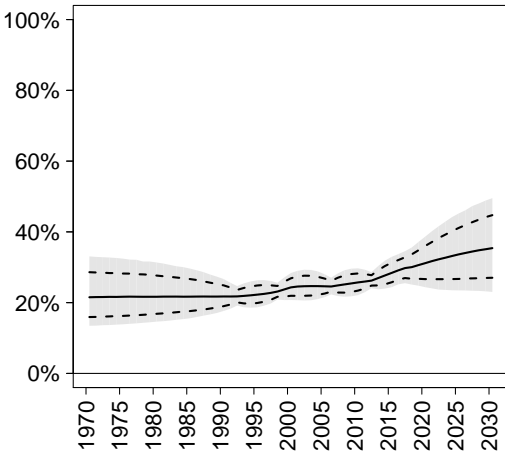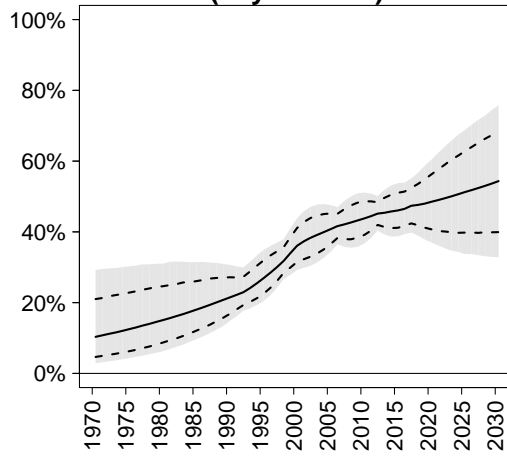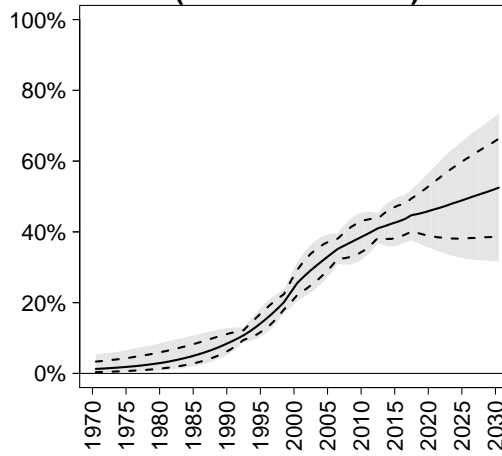



Nigeria --- All women

**CP (any)**

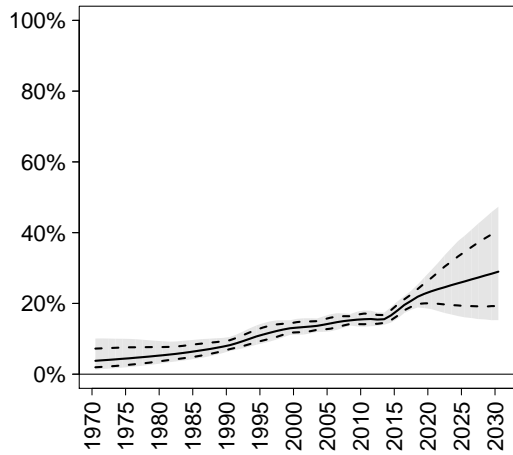

**CP (modern)**

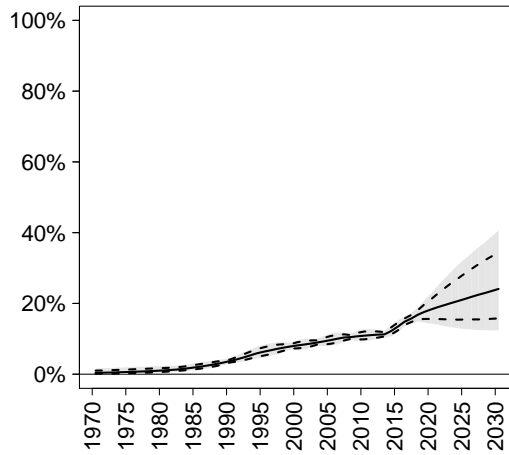

**CP (traditional)**

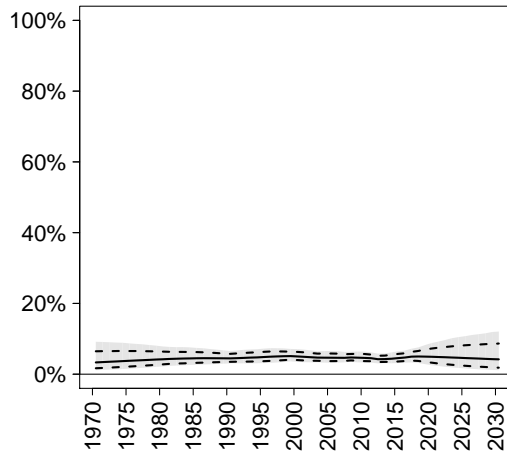

**Unmet need among all unmarried women**

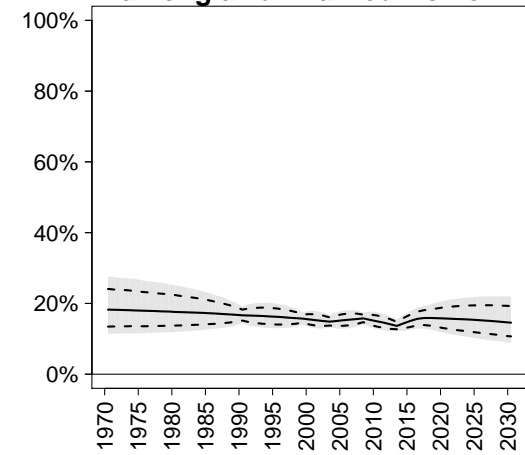

**Total demand**

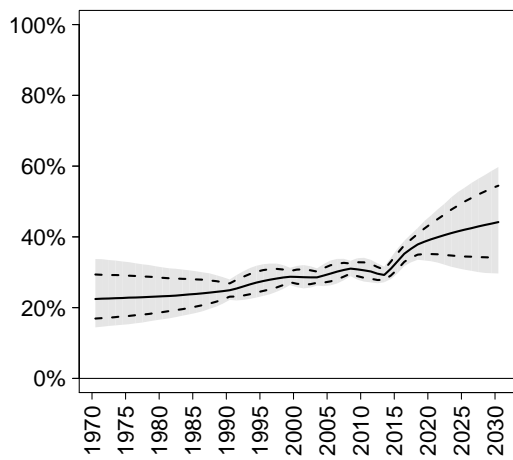

**Demand satisfied (any method)**

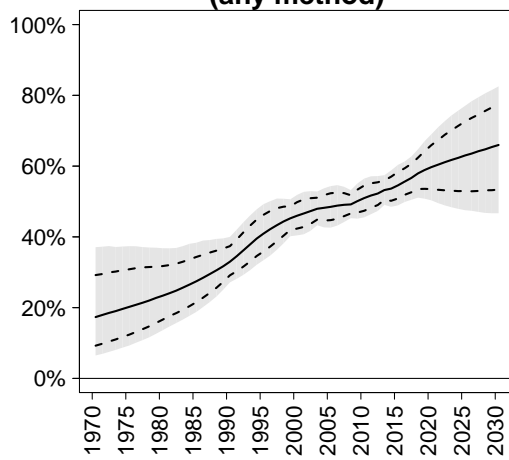

**Demand satisfied (modern methods)**

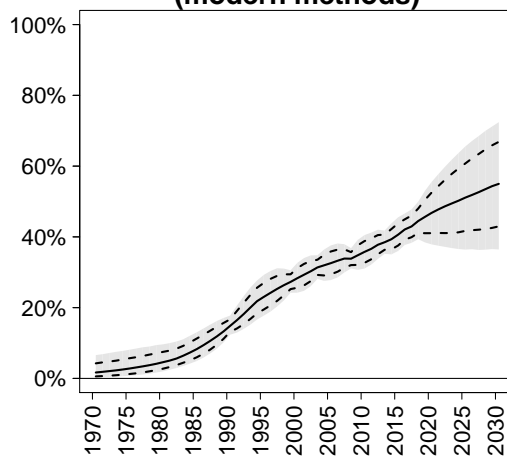

Norway --- All women

**CP (any)**

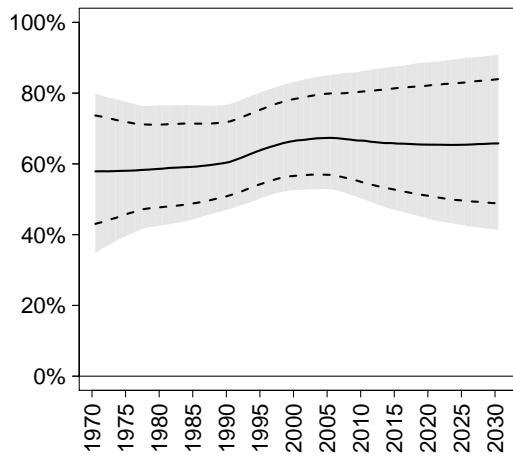

**CP (modern)**

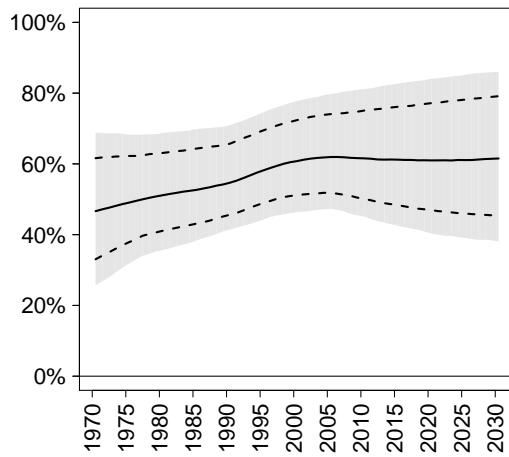

**CP (traditional)**

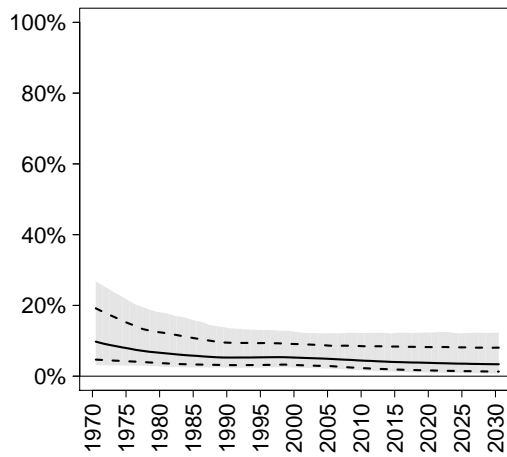

**Unmet need among all unmarried women**

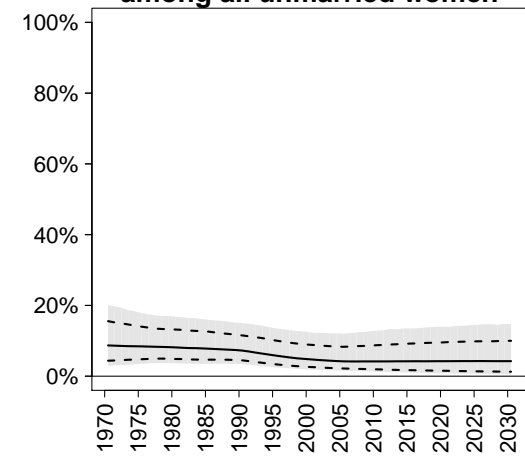

**Total demand**

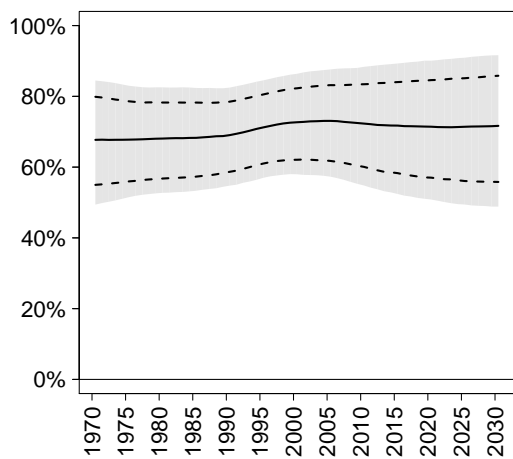

**Demand satisfied (any method)**

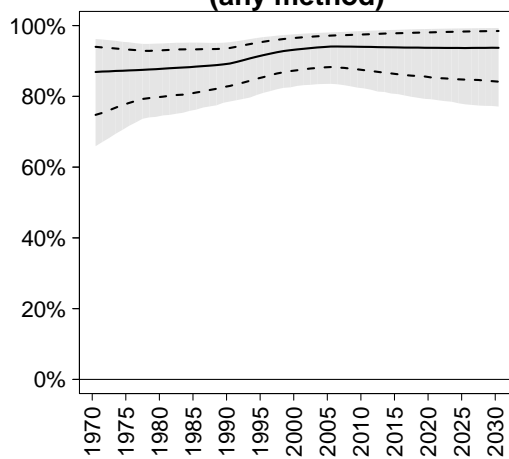

**Demand satisfied (modern methods)**

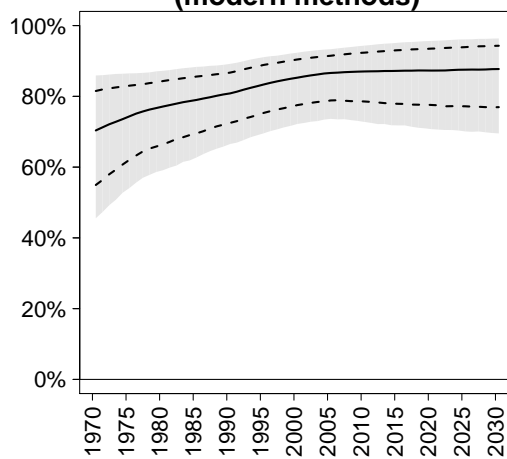

Oman --- All women

**CP (any)**

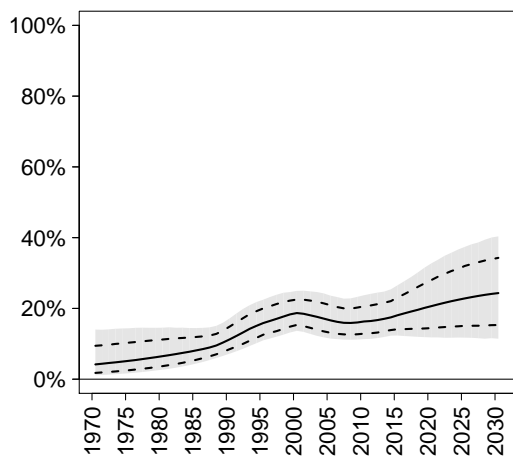

**CP (modern)**

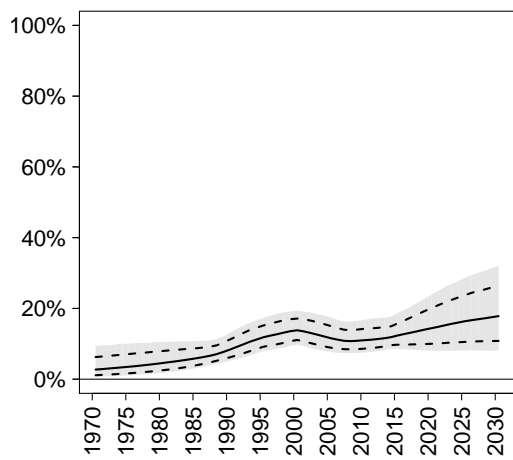

**CP (traditional)**

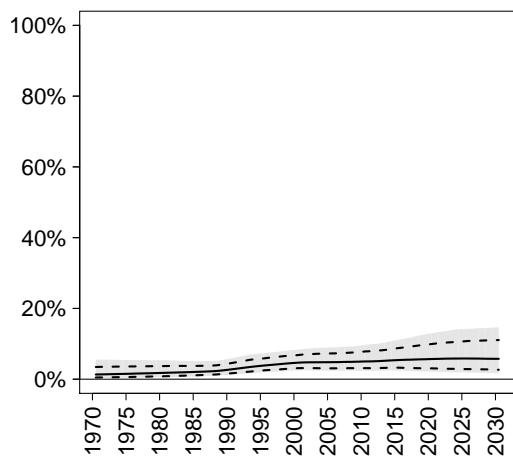

**Unmet need among all unmarried women**

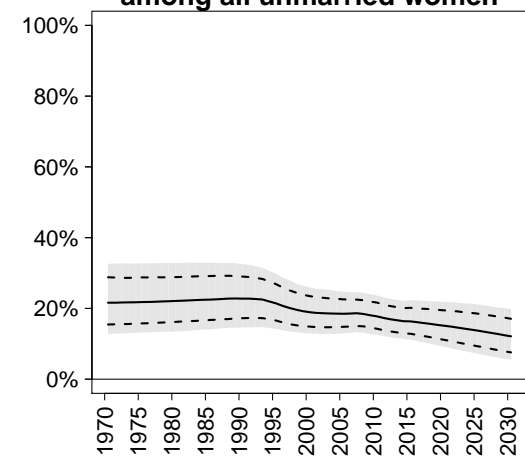

**Total demand**

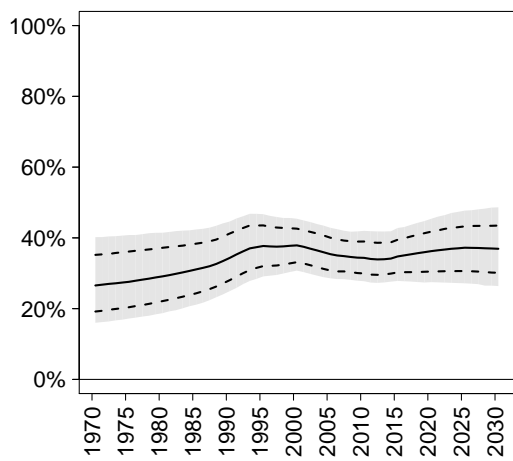

**Demand satisfied (any method)**

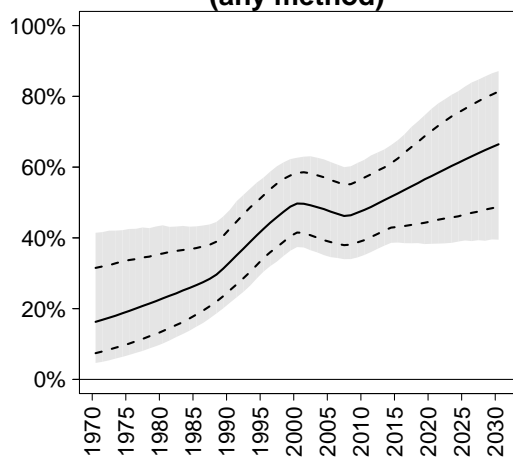

**Demand satisfied (modern methods)**

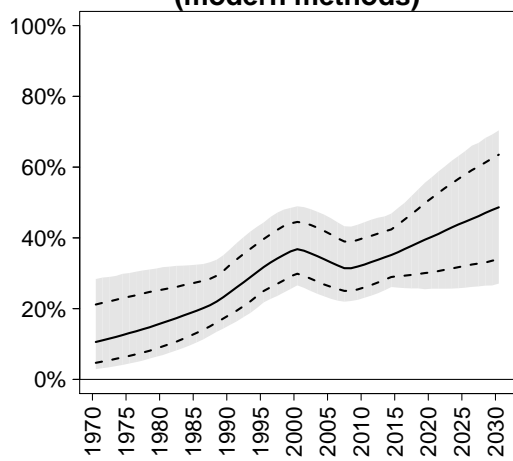

Pakistan --- All women

**CP (any)**

**CP (modern)**

**CP (traditional)**

**Unmet need among all unmarried women**

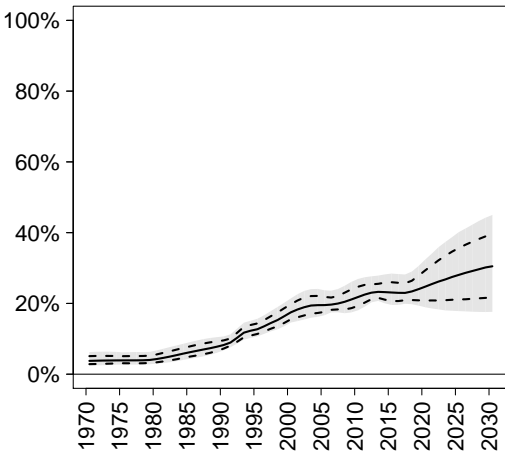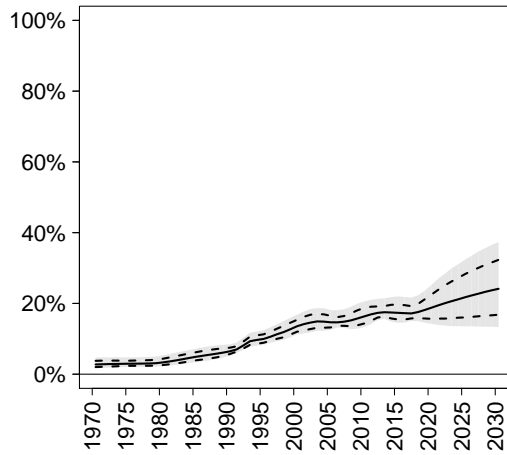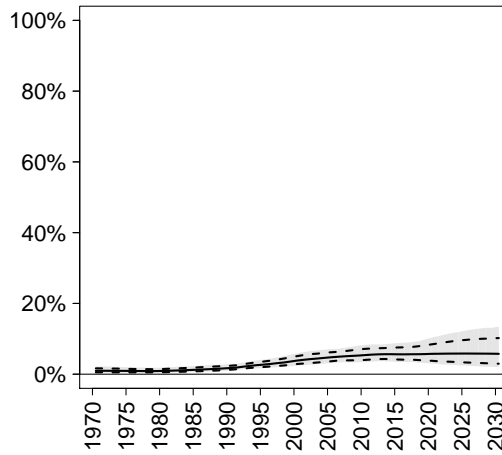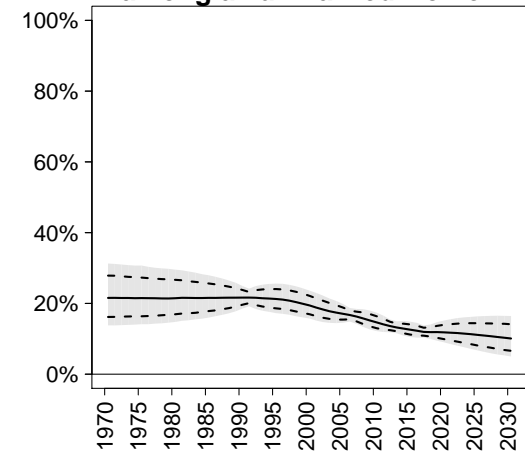

**Total demand**

**Demand satisfied (any method)**

**Demand satisfied (modern methods)**

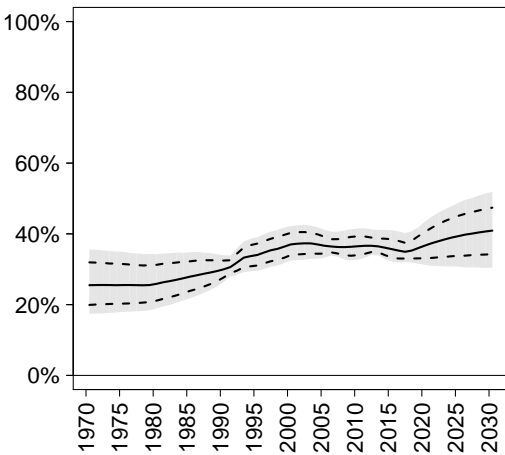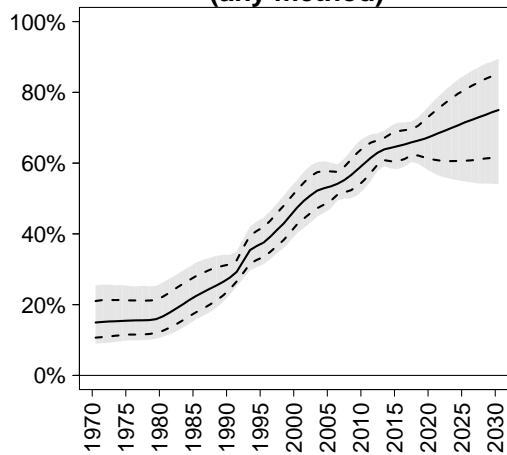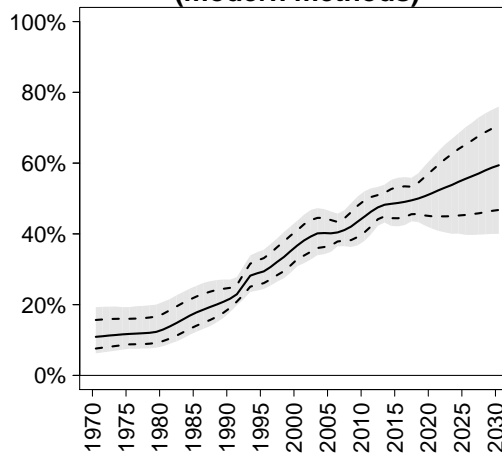

Panama --- All women

**CP (any)**

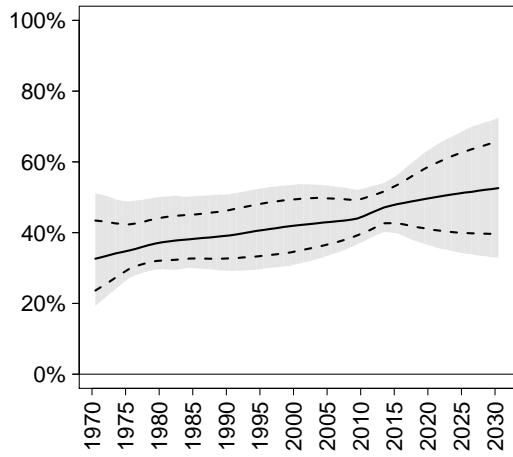

**CP (modern)**

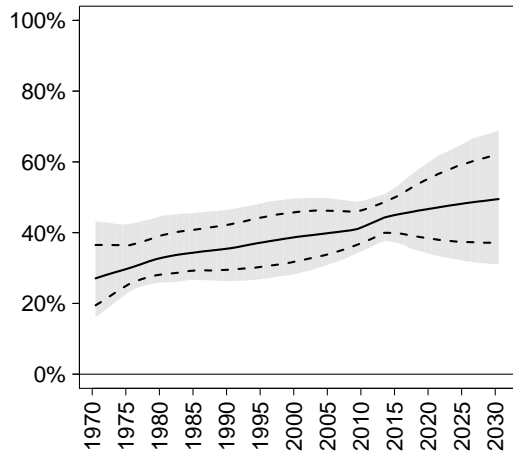

**CP (traditional)**

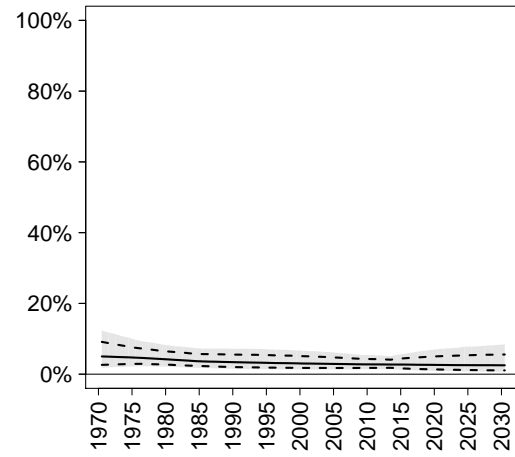

**Unmet need among all unmarried women**

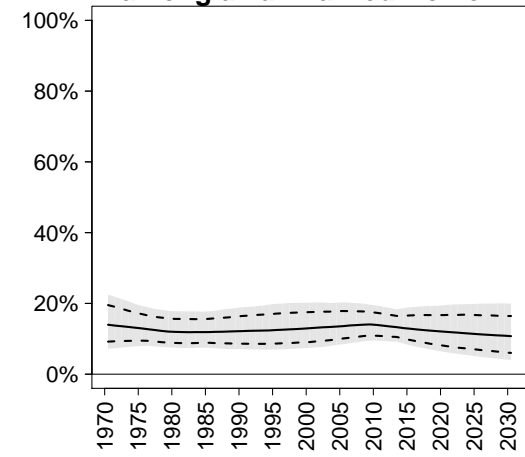

**Total demand**

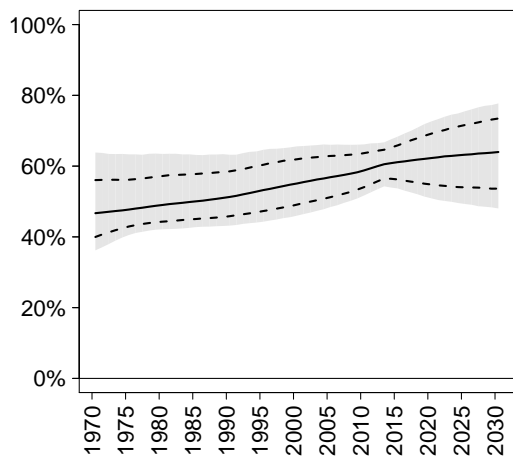

**Demand satisfied (any method)**

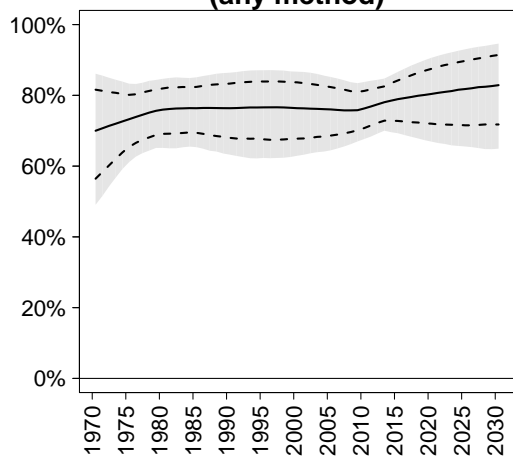

**Demand satisfied (modern methods)**

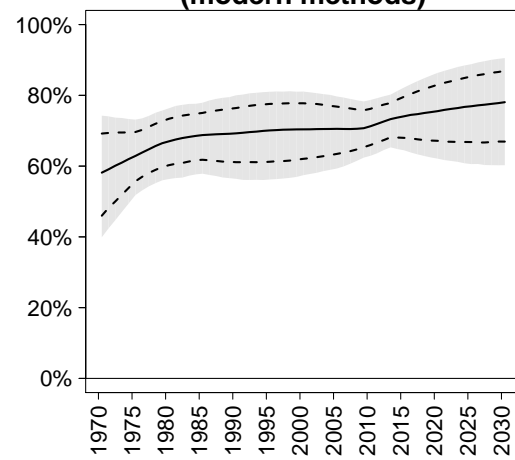

Papua New Guinea --- All women

**CP (any)**

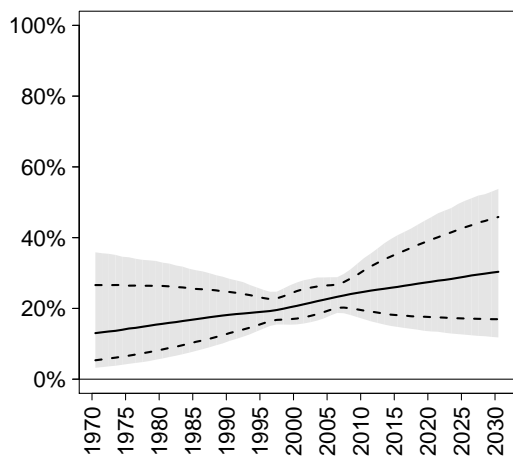

**CP (modern)**

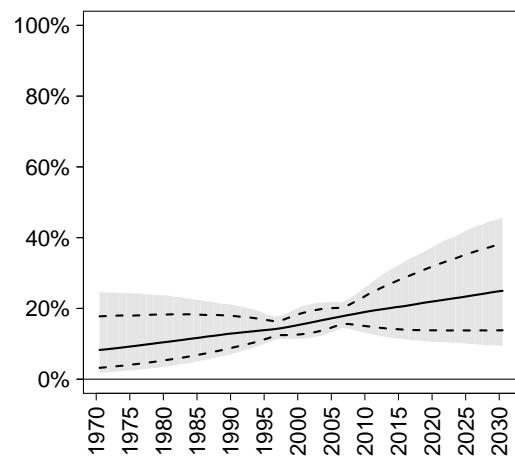

**CP (traditional)**

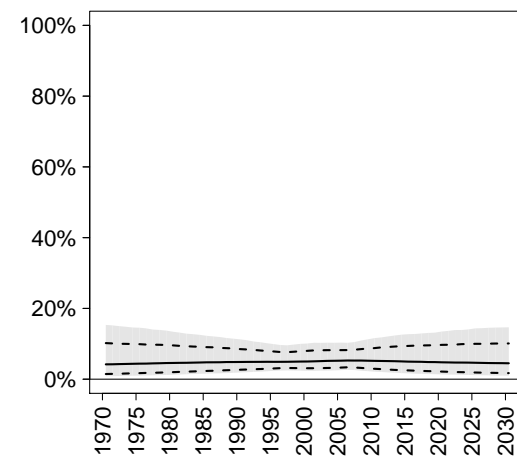

**Unmet need among all unmarried women**

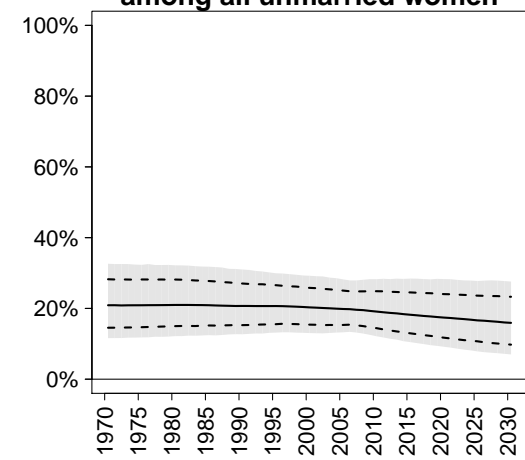

**Total demand**

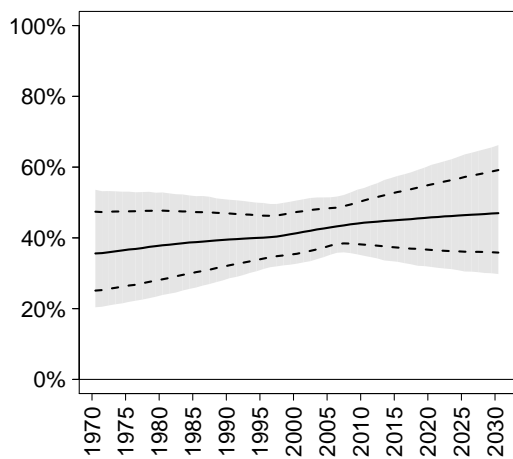

Paraguay --- All women

**CP (any)**

**CP (modern)**

**CP (traditional)**

**Unmet need  
among all unmarried women**

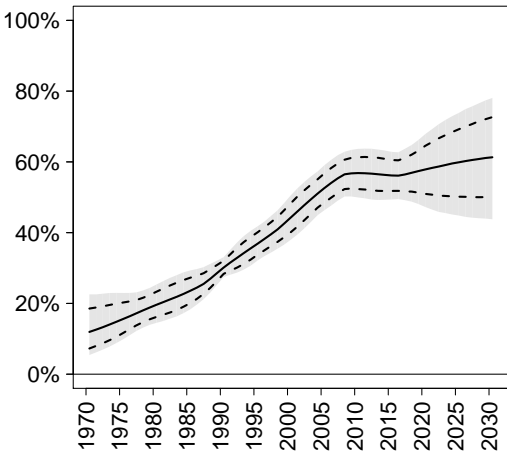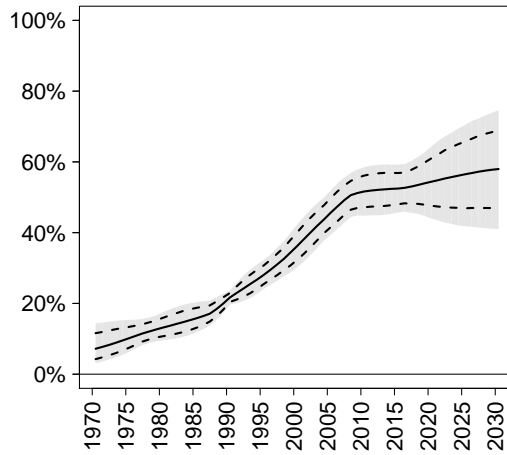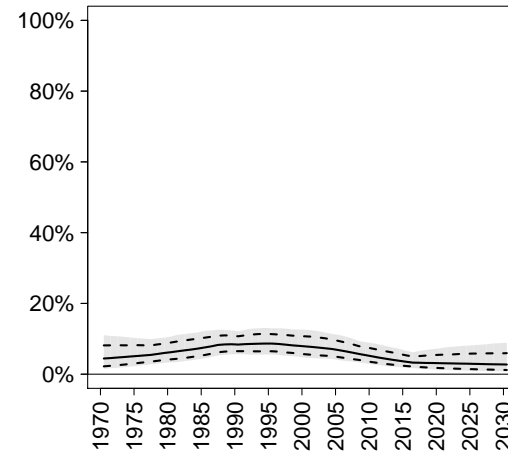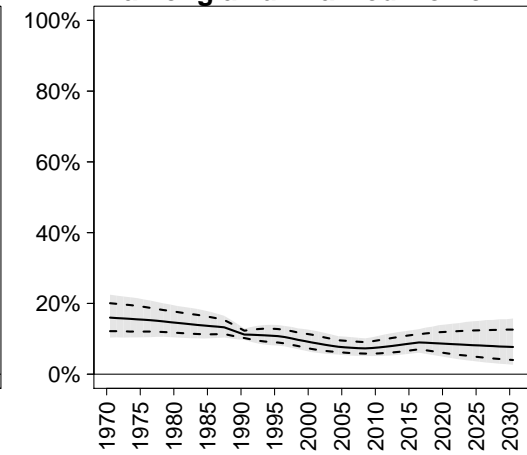

**Total demand**

**Demand satisfied  
(any method)**

**Demand satisfied  
(modern methods)**

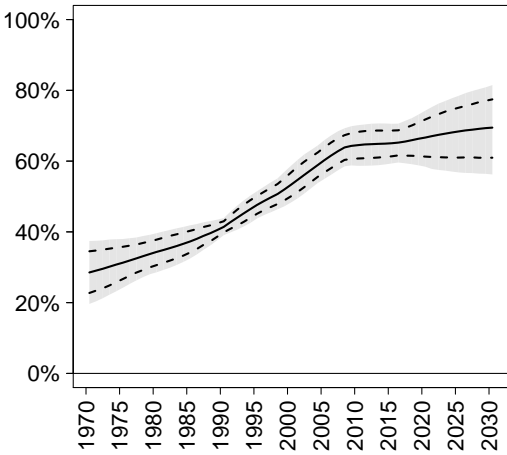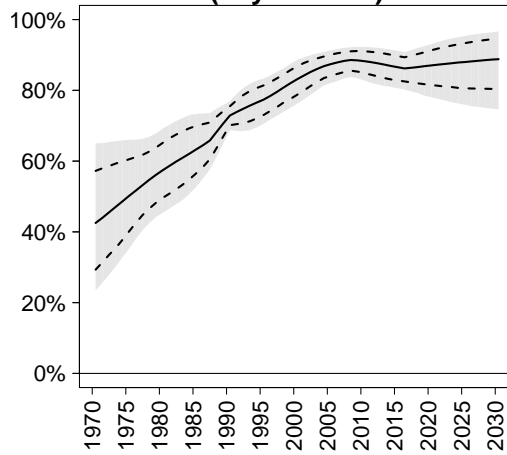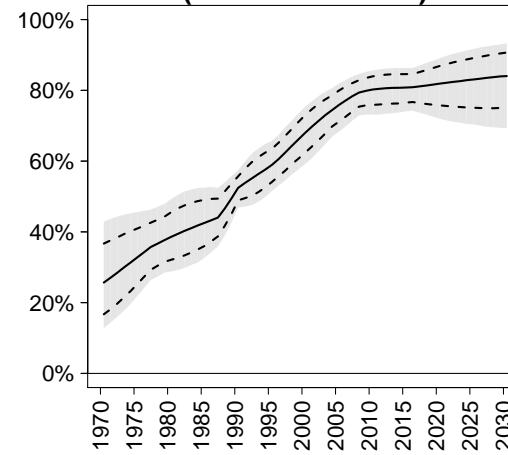

Peru --- All women

**CP (any)**

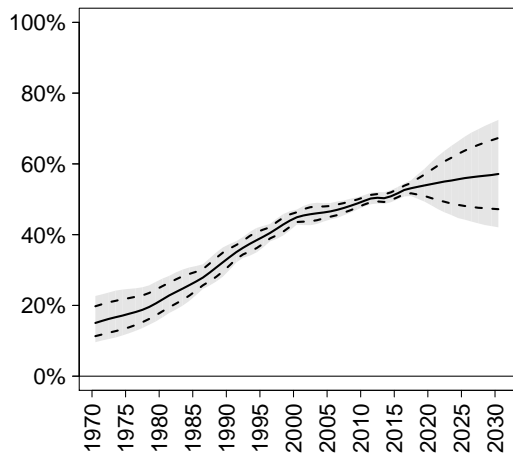

**CP (modern)**

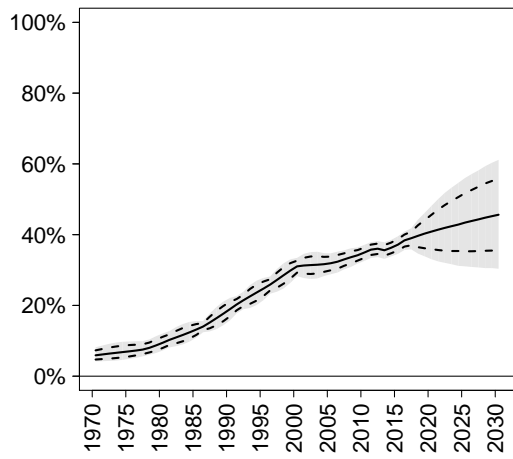

**CP (traditional)**

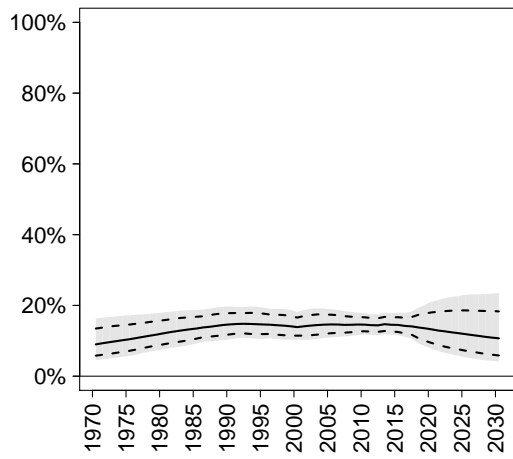

**Unmet need among all unmarried women**

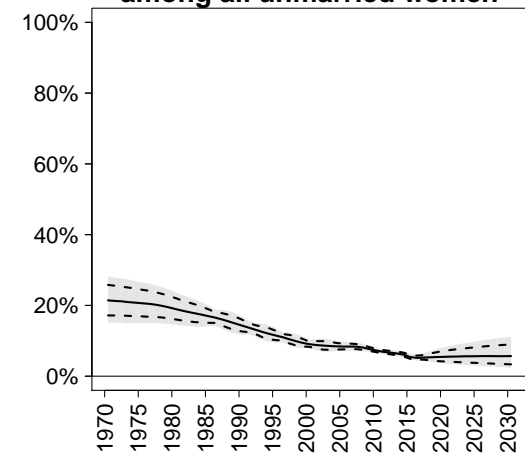

**Total demand**

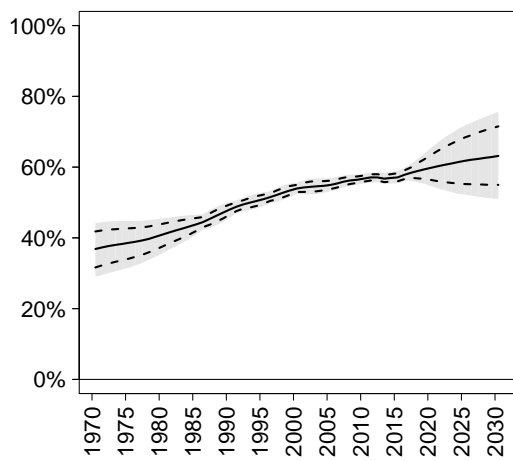

**Demand satisfied (any method)**

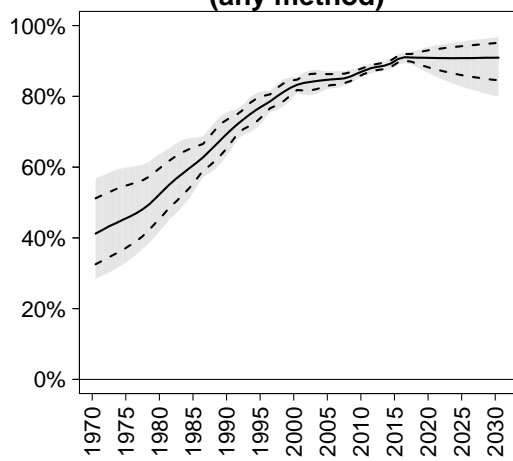

**Demand satisfied (modern methods)**

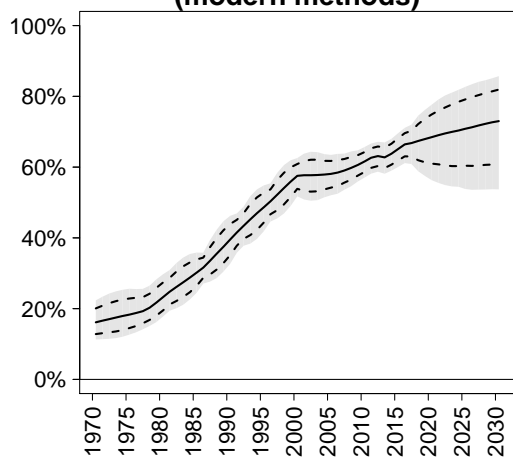



Philippines --- All women

**CP (any)**

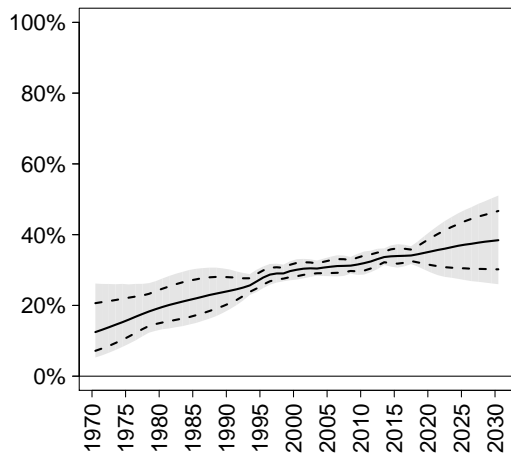

**CP (modern)**

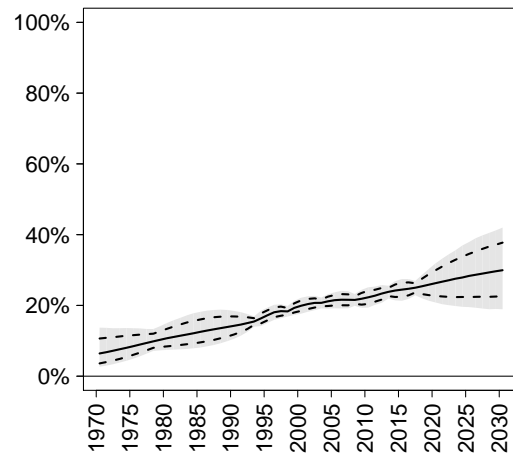

**CP (traditional)**

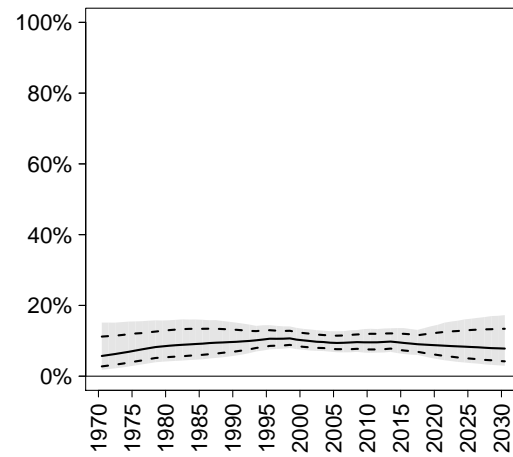

**Unmet need among all unmarried women**

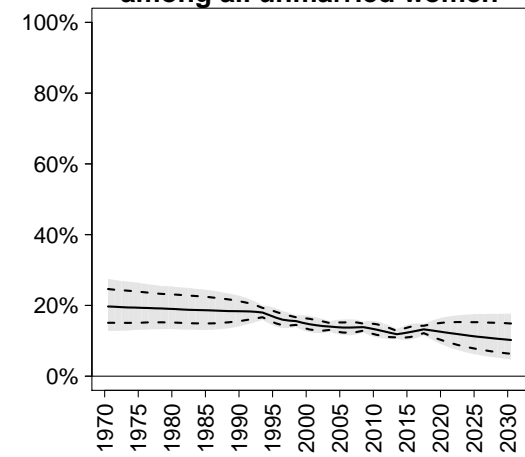

**Total demand**

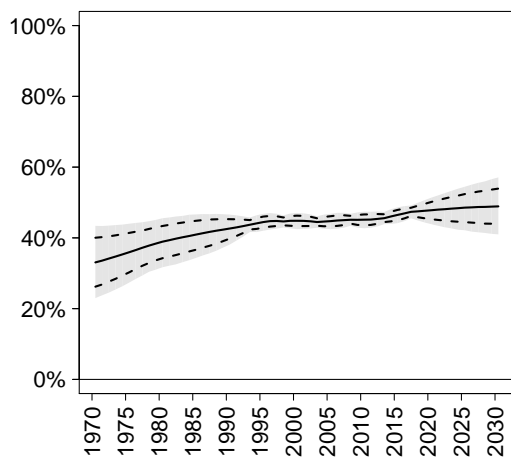

**Demand satisfied (any method)**

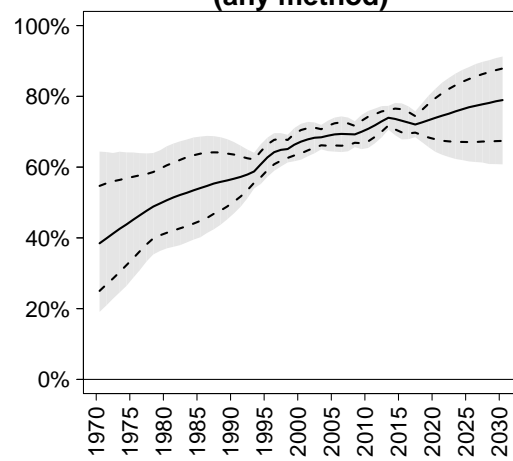

**Demand satisfied (modern methods)**

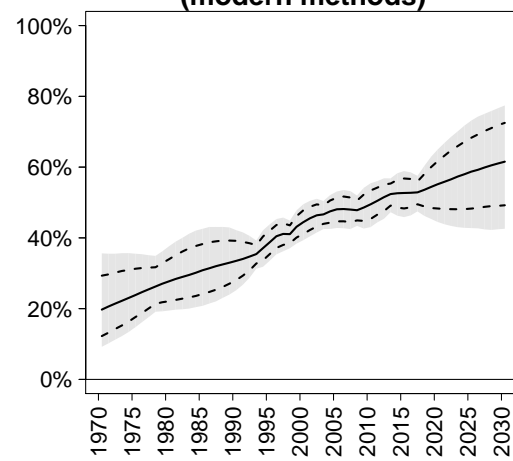

Poland --- All women

**CP (any)**

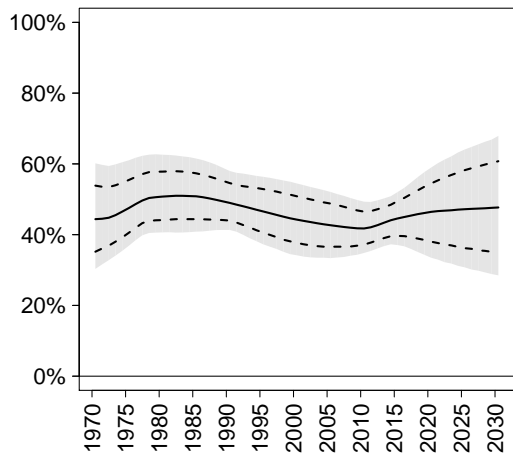

**CP (modern)**

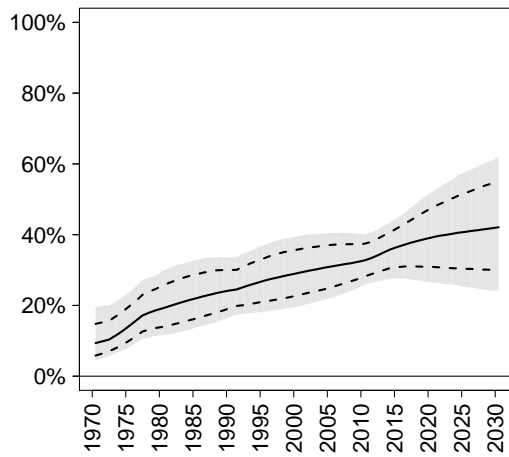

**CP (traditional)**

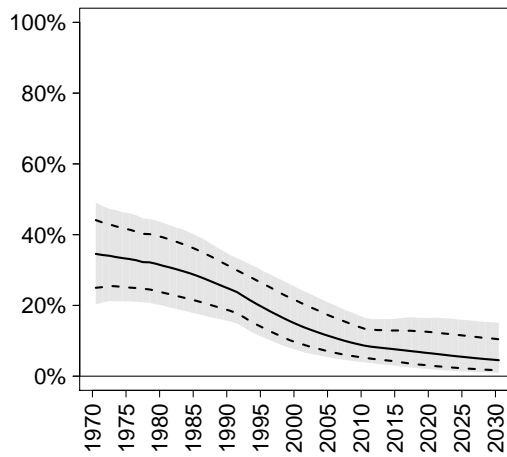

**Unmet need among all unmarried women**

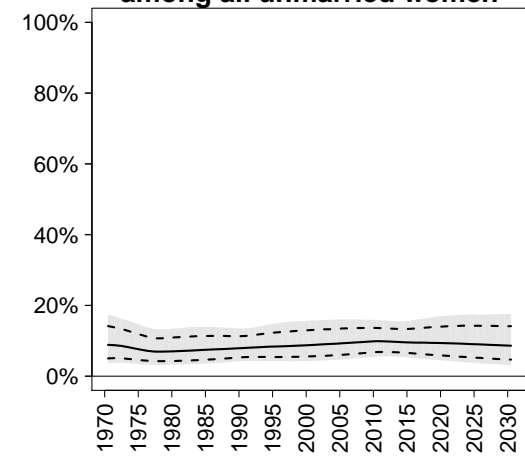

**Total demand**

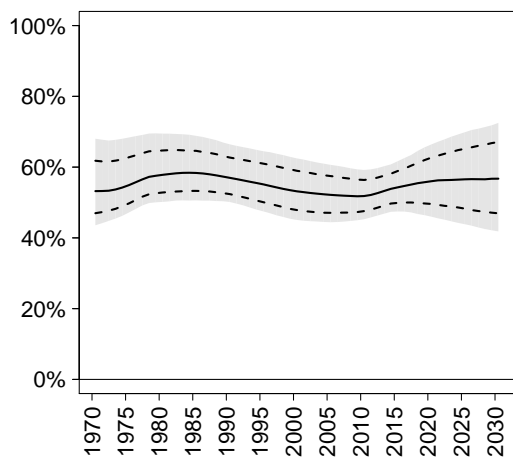

Portugal --- All women

**CP (any)**

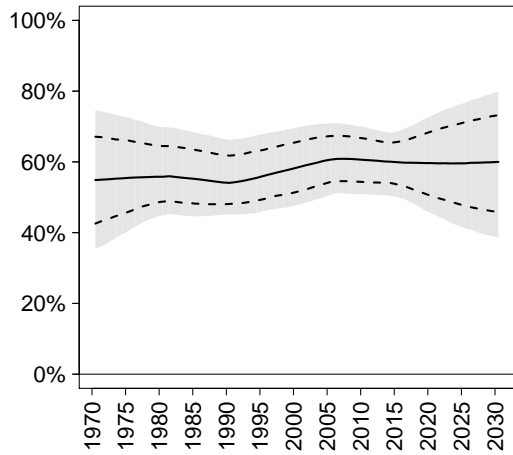

**CP (modern)**

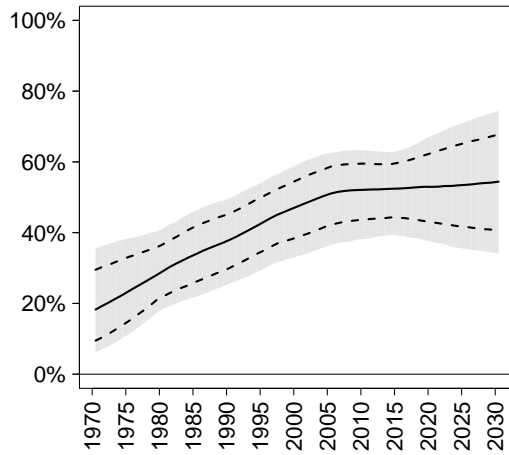

**CP (traditional)**

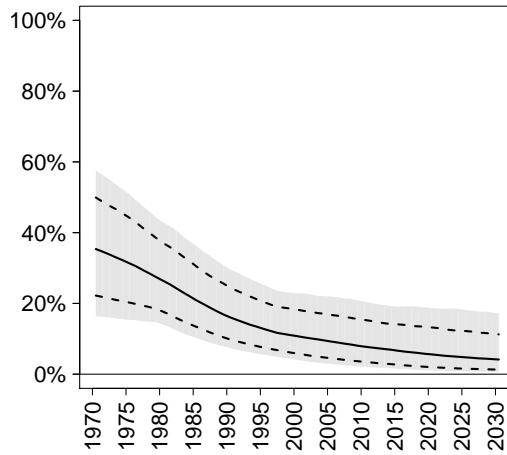

**Unmet need among all unmarried women**

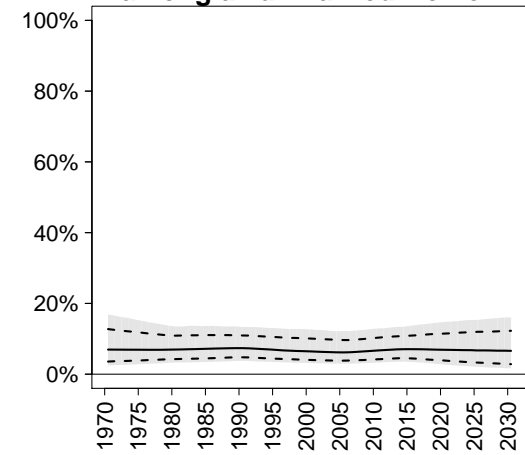

**Total demand**

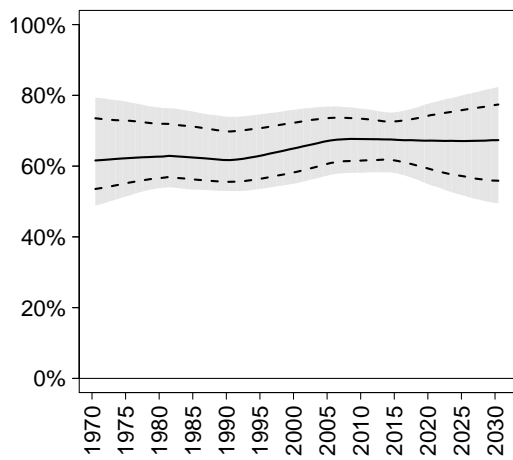

**Demand satisfied (any method)**

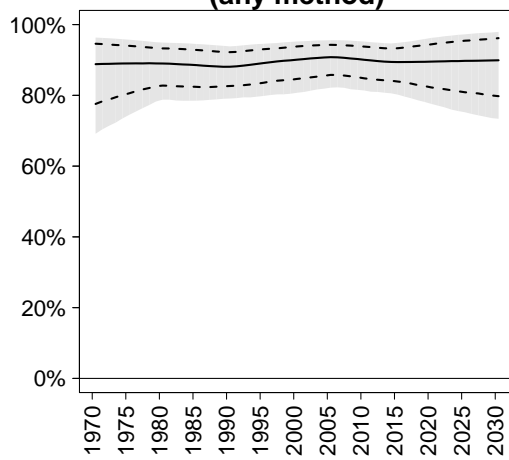

**Demand satisfied (modern methods)**

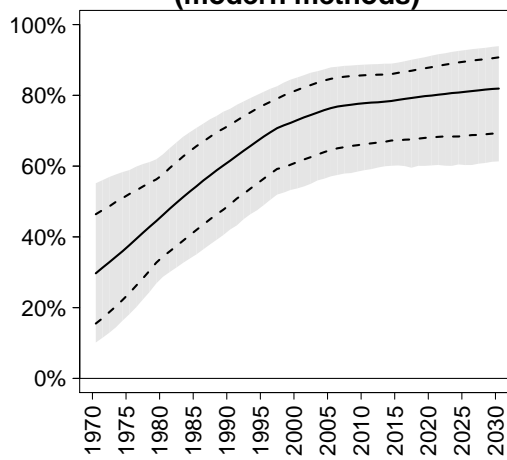

Puerto Rico --- All women

**CP (any)**

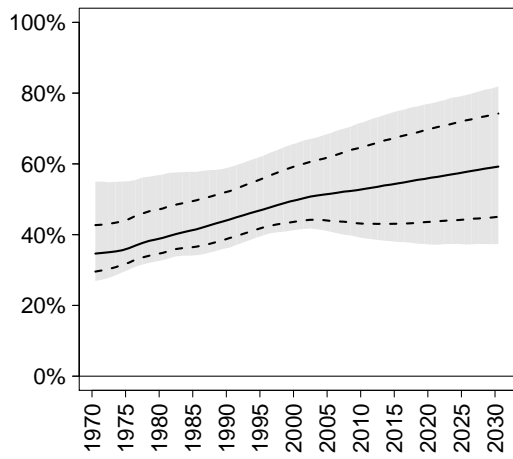

**CP (modern)**

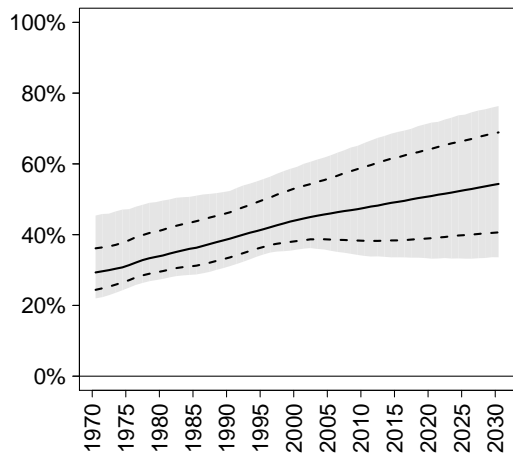

**CP (traditional)**

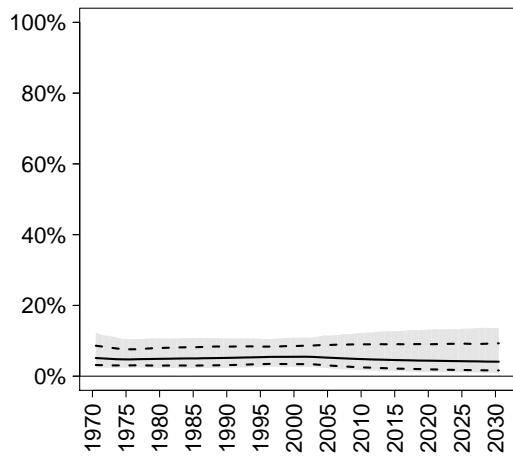

**Unmet need among all unmarried women**

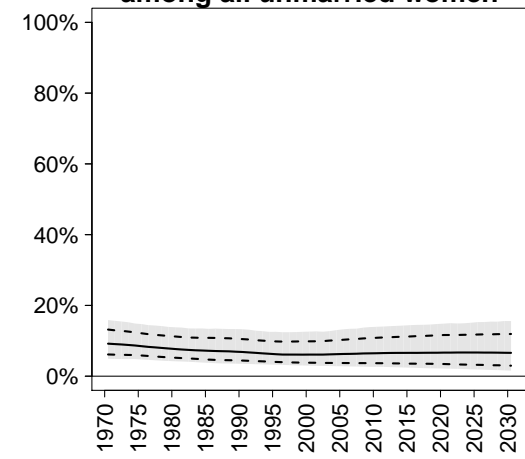

**Total demand**

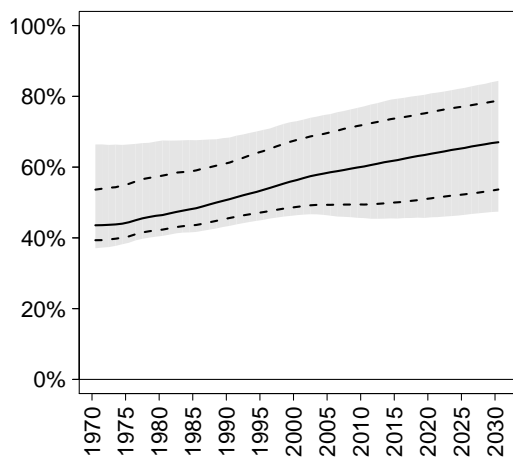

**Demand satisfied (any method)**

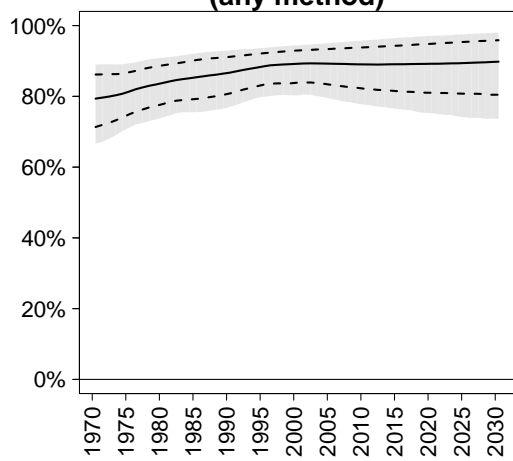

**Demand satisfied (modern methods)**

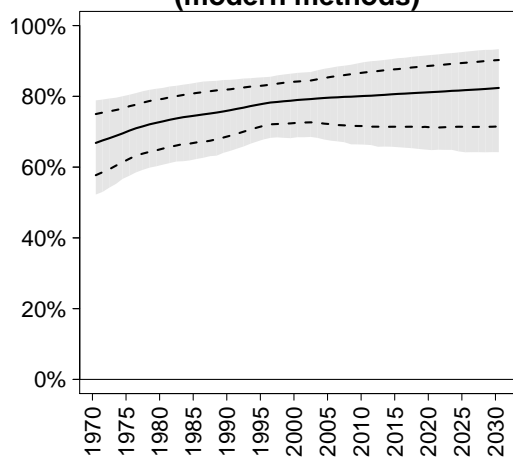

Qatar --- All women

**CP (any)**

**CP (modern)**

**CP (traditional)**

**Unmet need among all unmarried women**

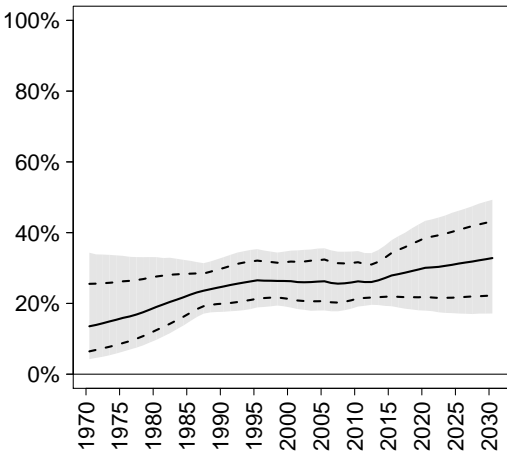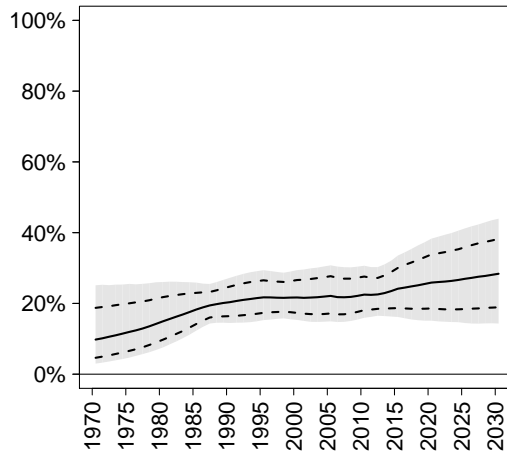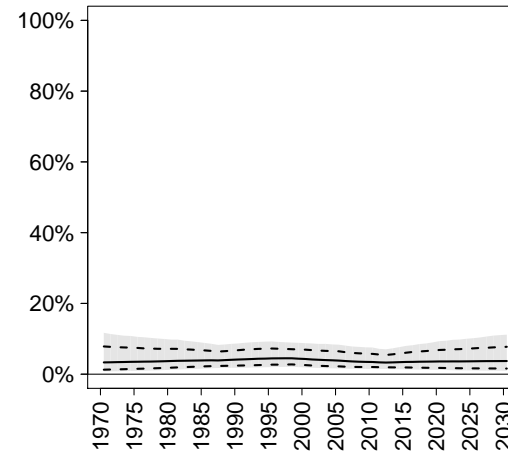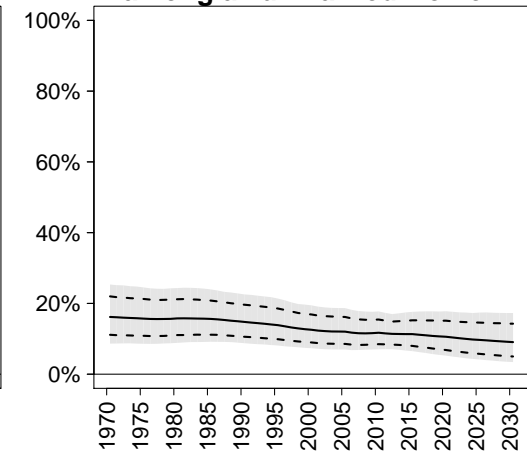

**Total demand**

**Demand satisfied (any method)**

**Demand satisfied (modern methods)**

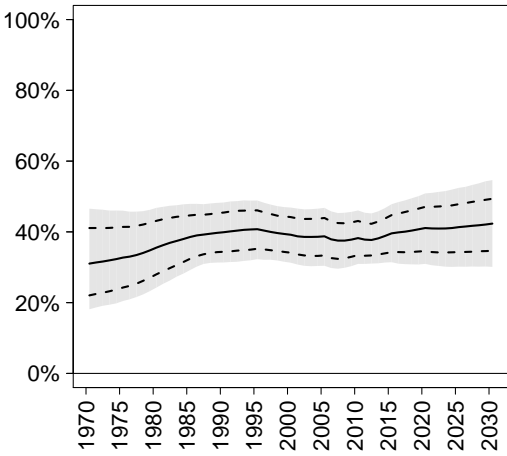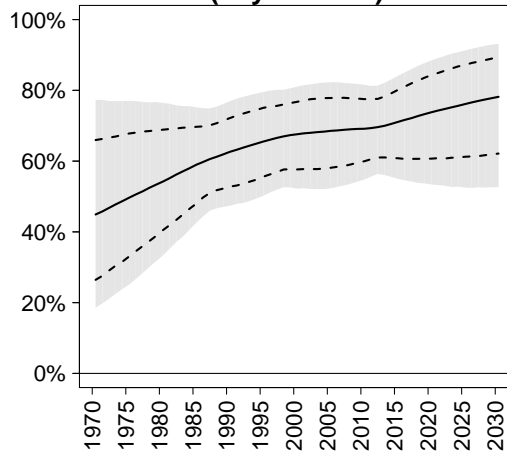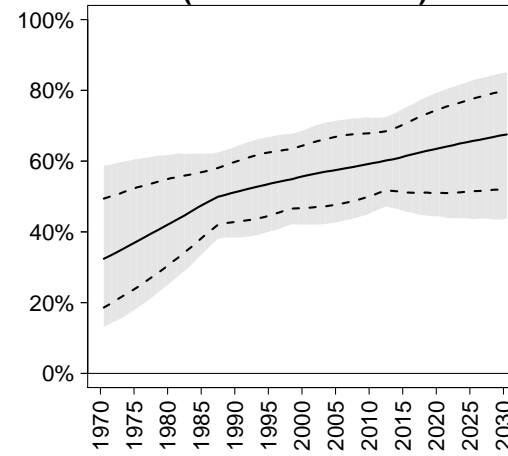

Republic of Korea --- All women

**CP (any)**

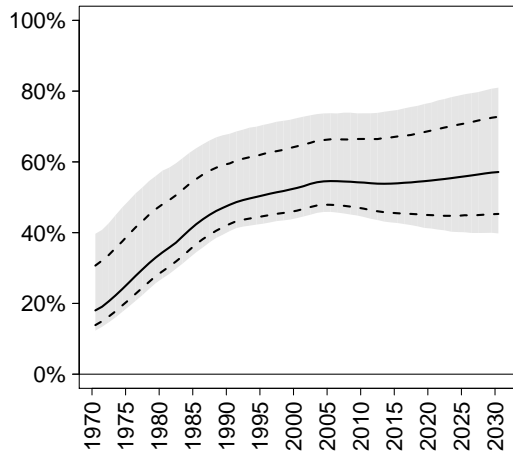

**CP (modern)**

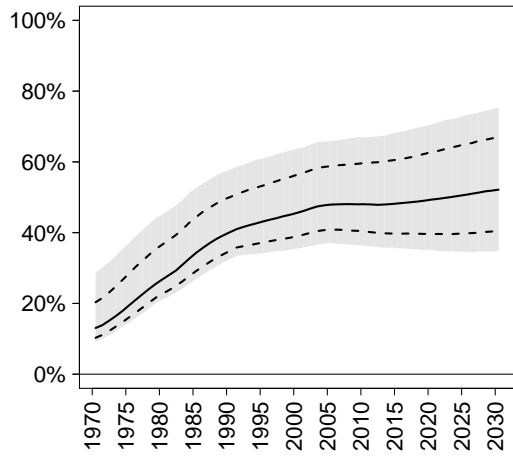

**CP (traditional)**

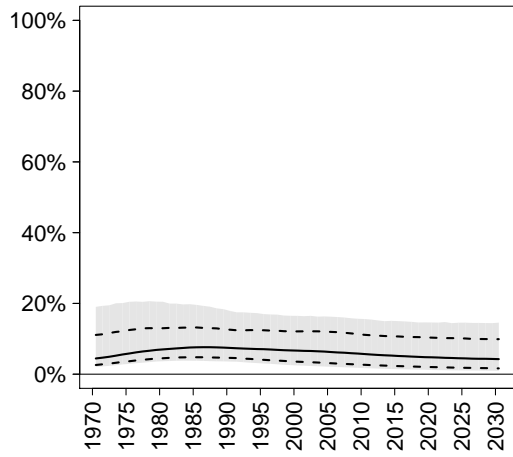

**Unmet need among all unmarried women**

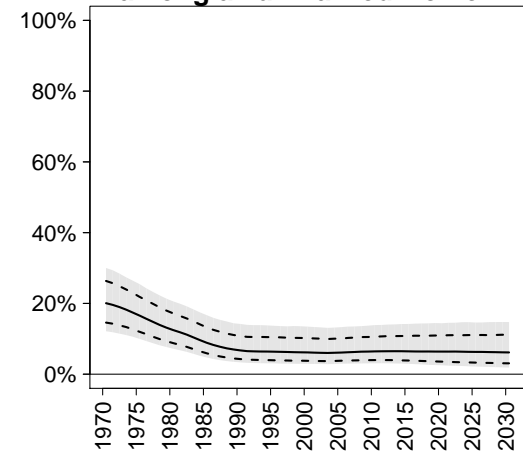

**Total demand**

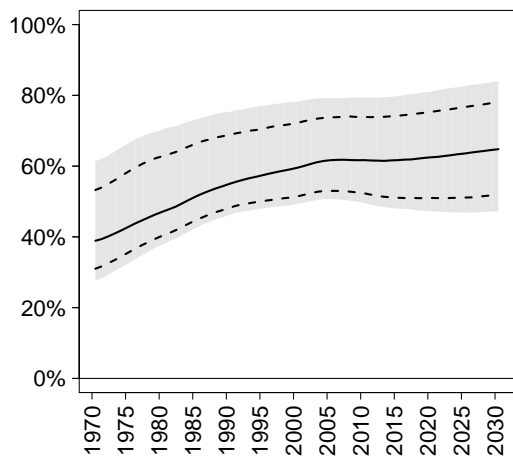

**Demand satisfied (any method)**

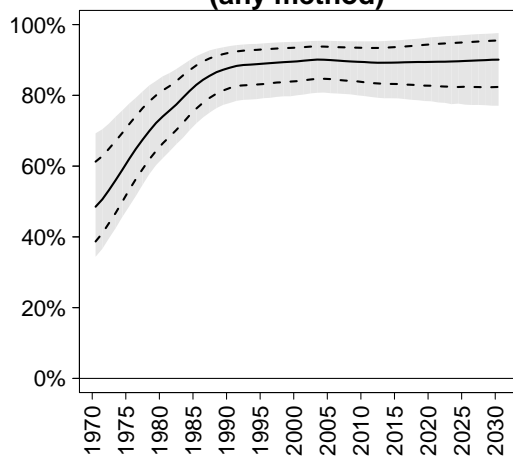

**Demand satisfied (modern methods)**

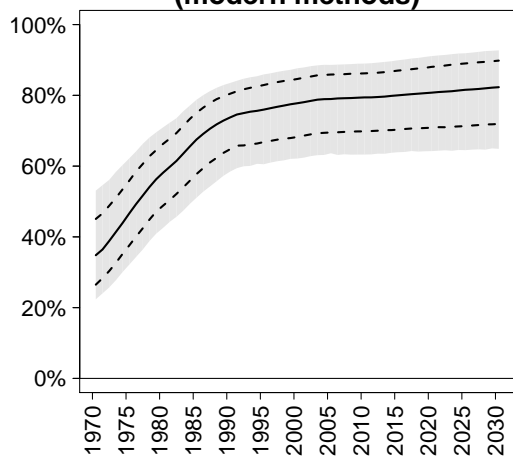

Republic of Moldova --- All women

**CP (any)**

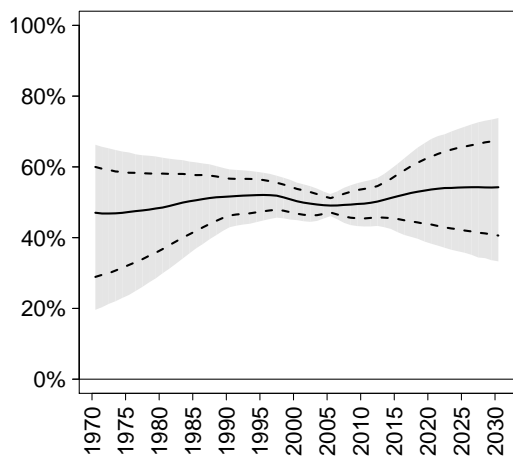

**CP (modern)**

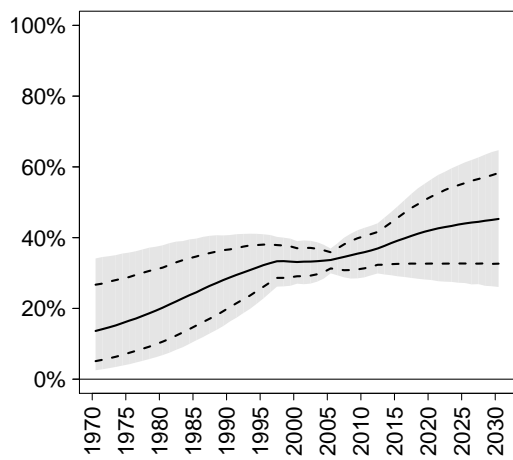

**CP (traditional)**

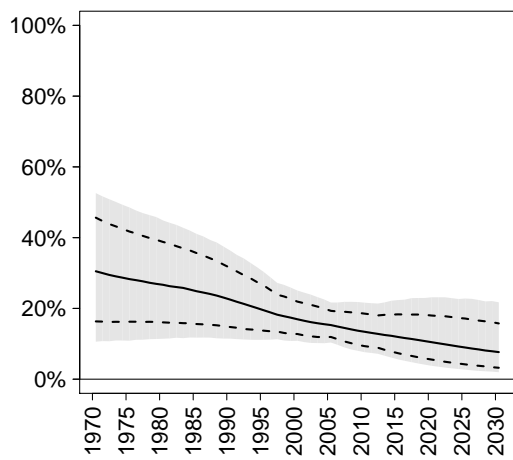

**Unmet need among all unmarried women**

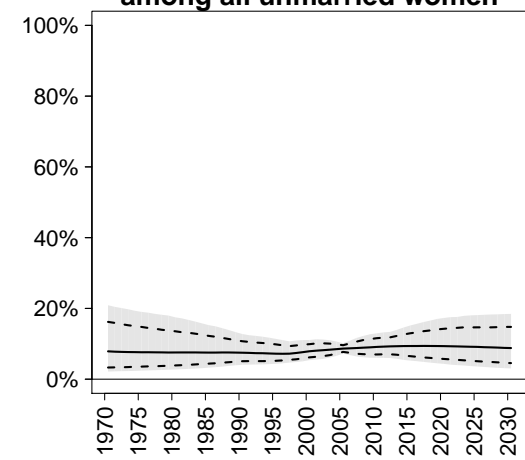

**Total demand**

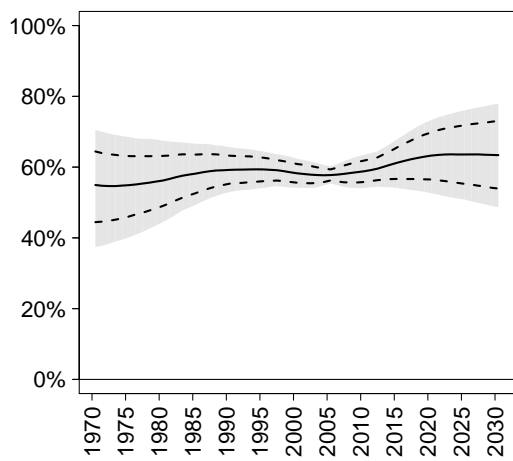

**Demand satisfied (any method)**

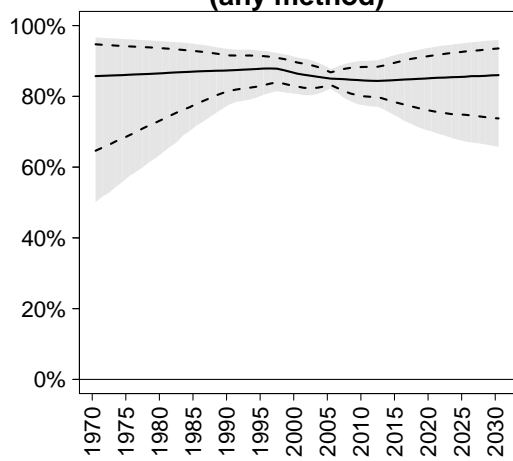

**Demand satisfied (modern methods)**

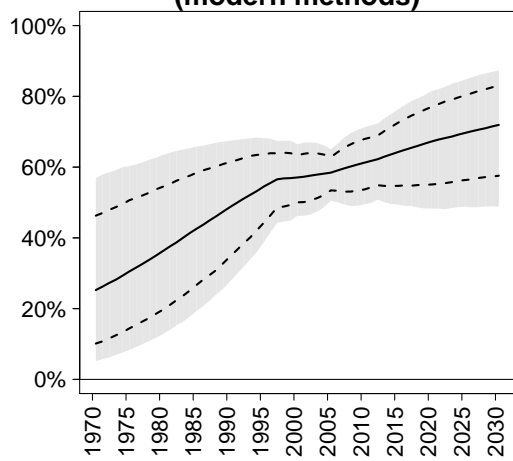

Réunion --- All women

**CP (any)**

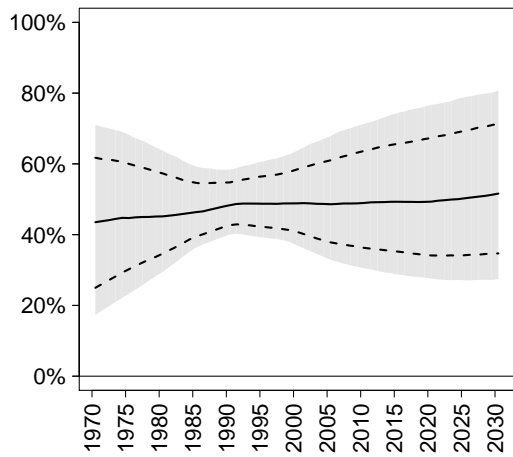

**CP (modern)**

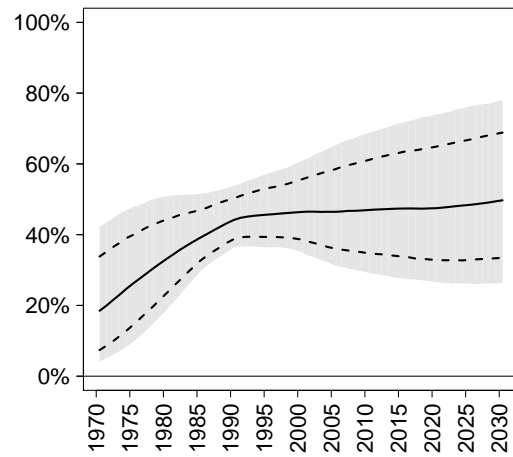

**CP (traditional)**

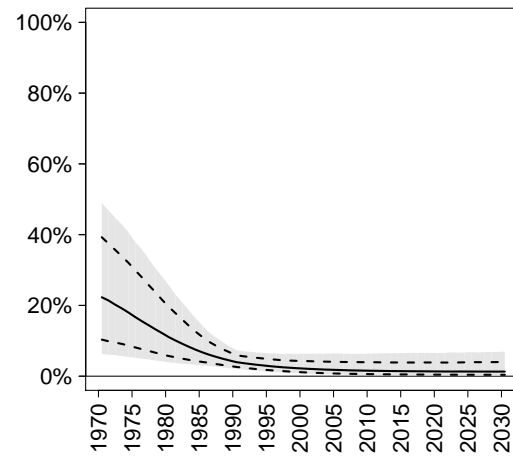

**Unmet need among all unmarried women**

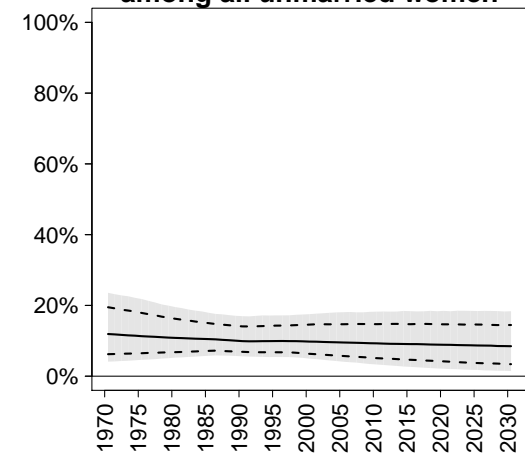

**Total demand**

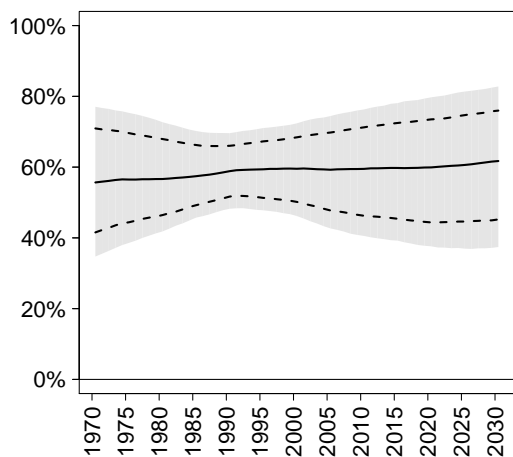



Romania --- All women

**CP (any)**

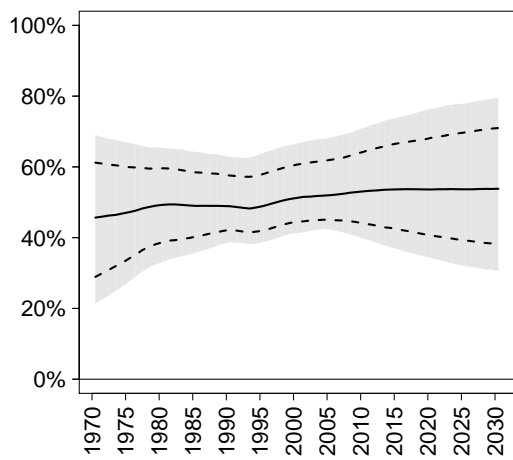

**CP (modern)**

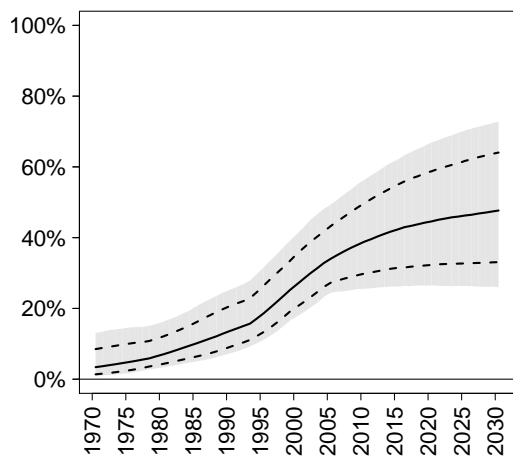

**CP (traditional)**

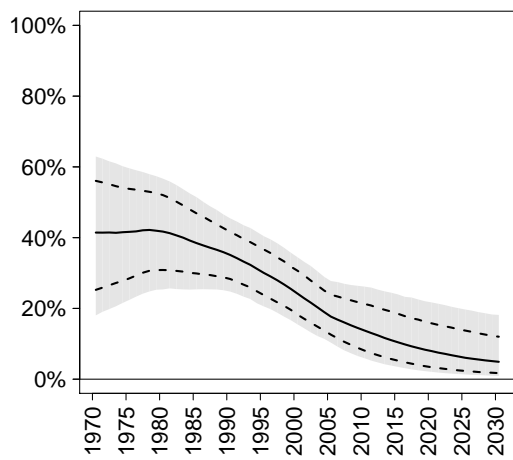

**Unmet need among all unmarried women**

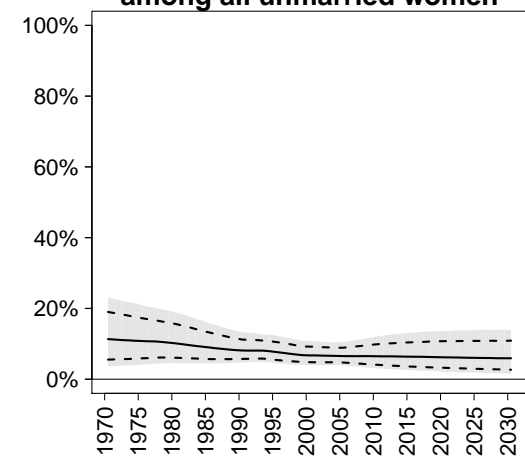

**Total demand**

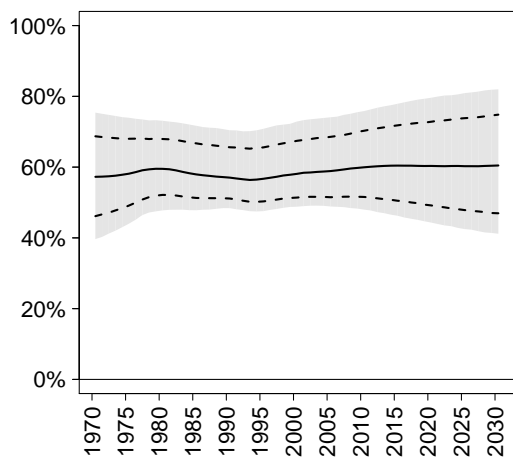

**Demand satisfied (any method)**

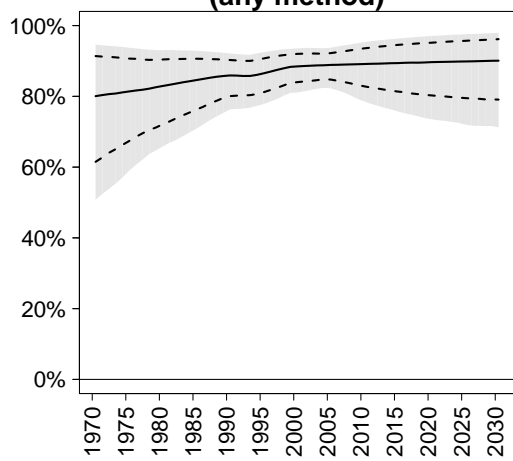

**Demand satisfied (modern methods)**

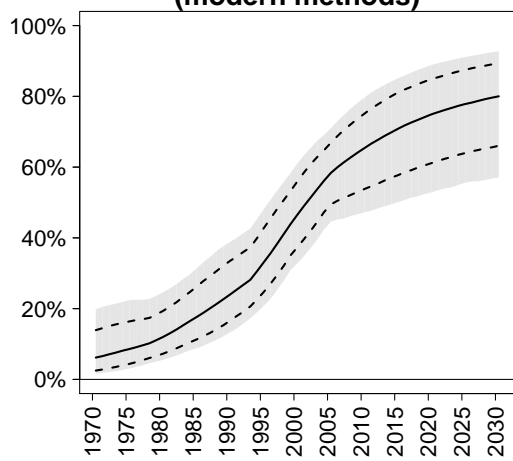

Russian Federation --- All women

**CP (any)**

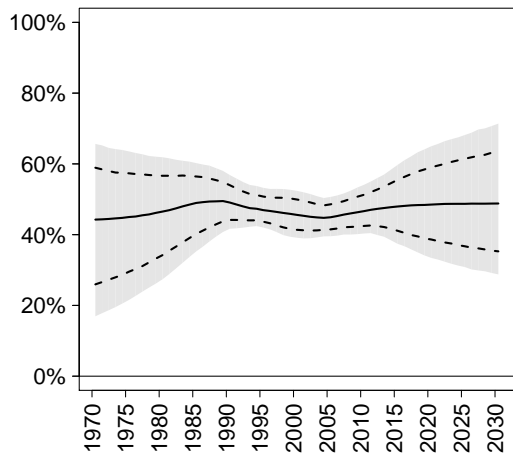

**CP (modern)**

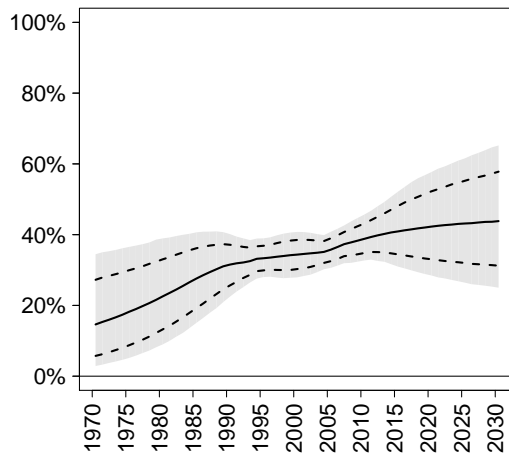

**CP (traditional)**

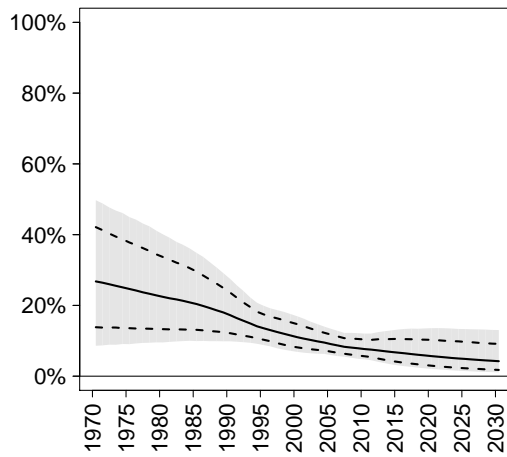

**Unmet need among all unmarried women**

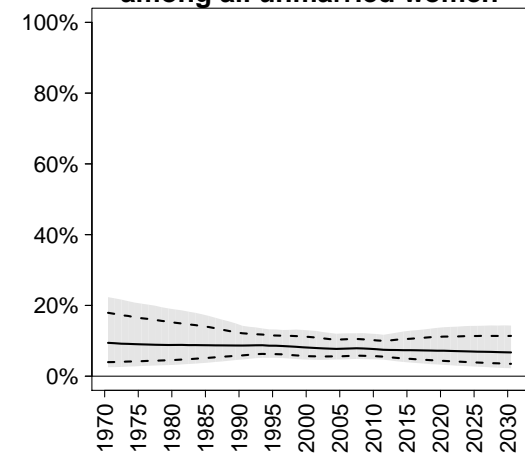

**Total demand**

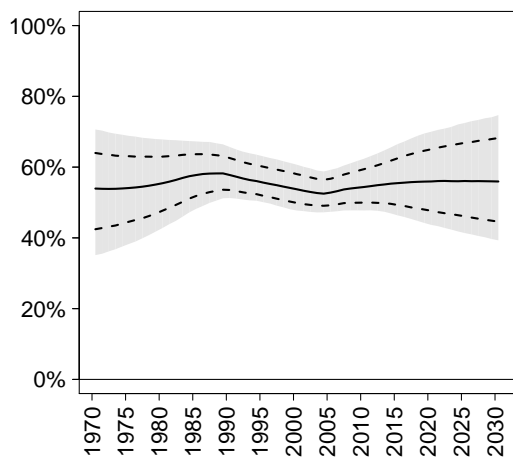

**Demand satisfied (any method)**

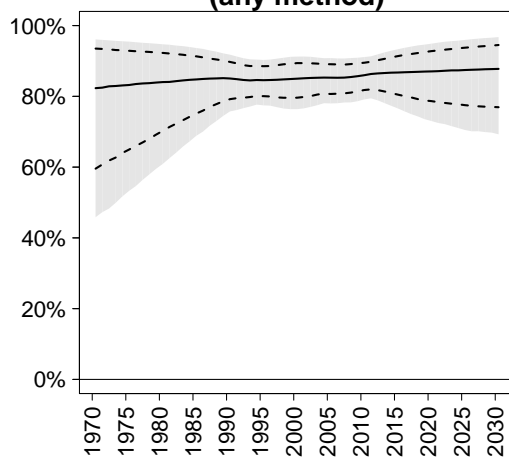

**Demand satisfied (modern methods)**

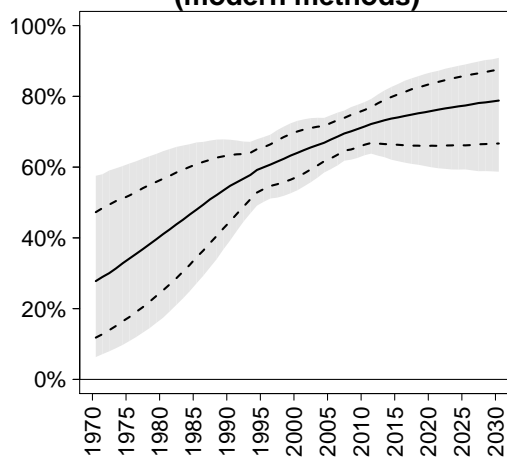

Rwanda --- All women

**CP (any)**

**CP (modern)**

**CP (traditional)**

**Unmet need  
among all unmarried women**

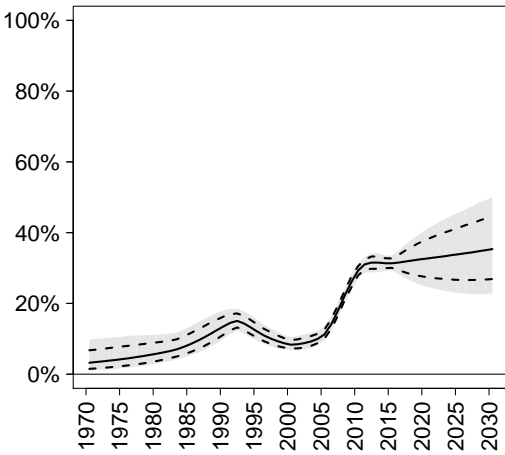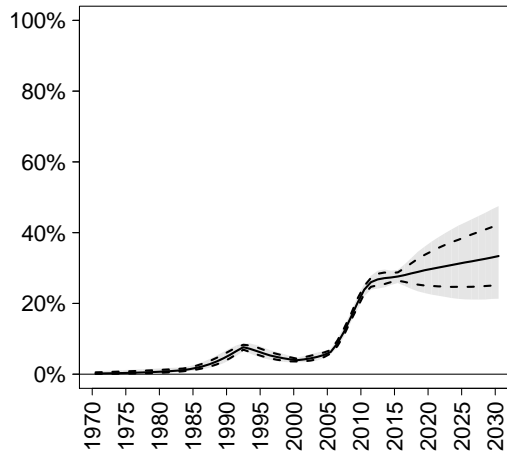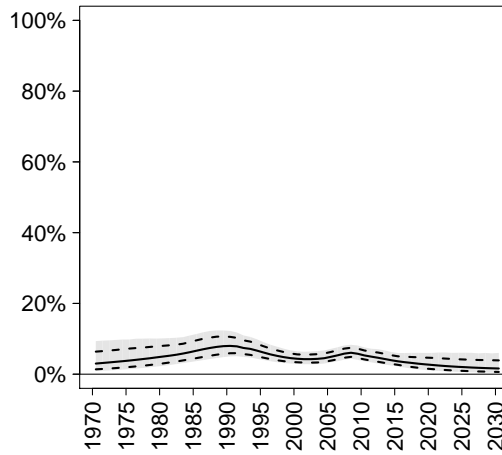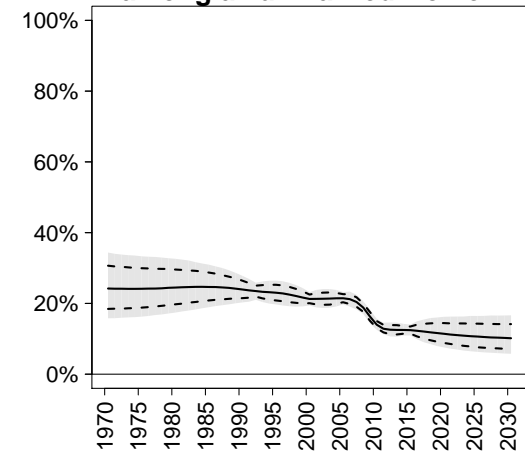

**Total demand**

**Demand satisfied  
(any method)**

**Demand satisfied  
(modern methods)**

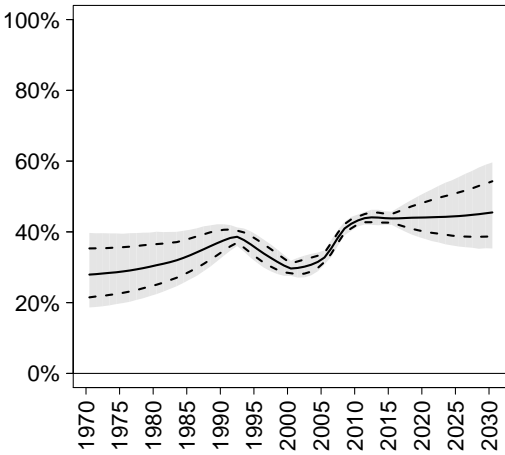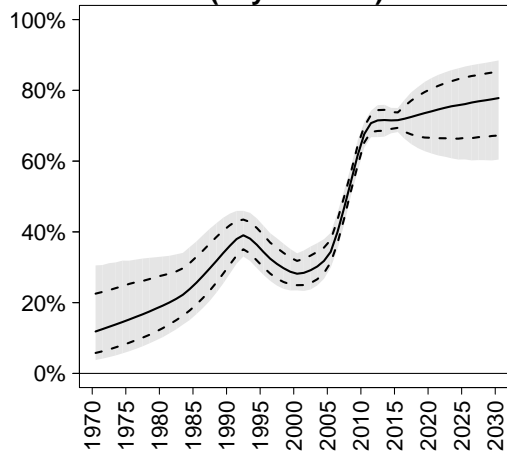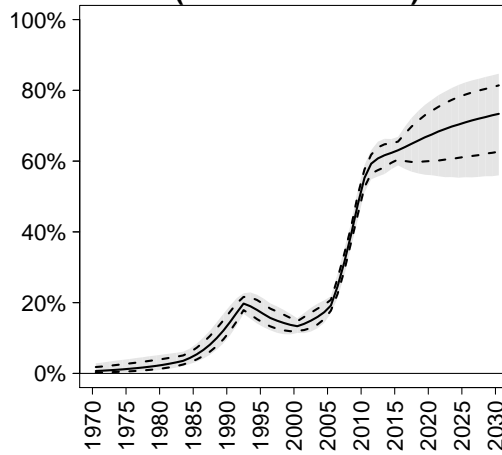

Saint Lucia --- All women

**CP (any)**

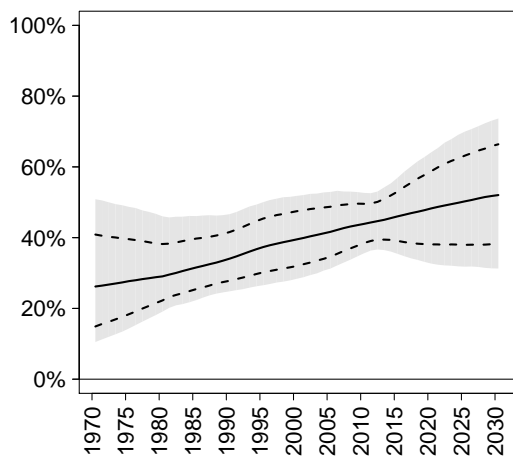

**CP (modern)**

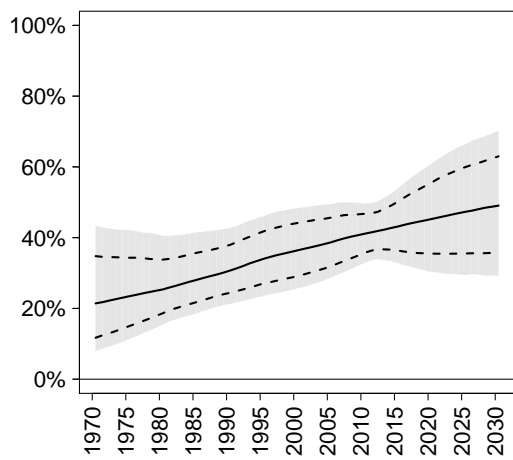

**CP (traditional)**

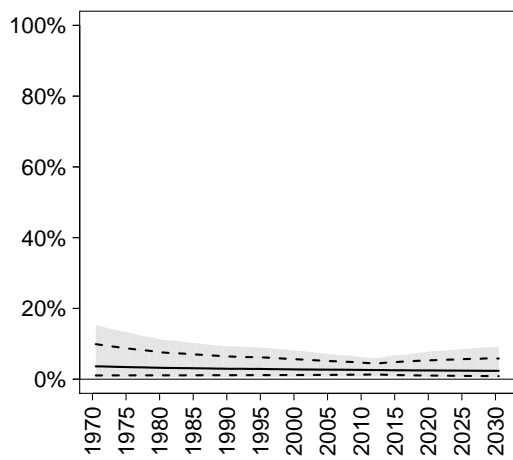

**Unmet need among all unmarried women**

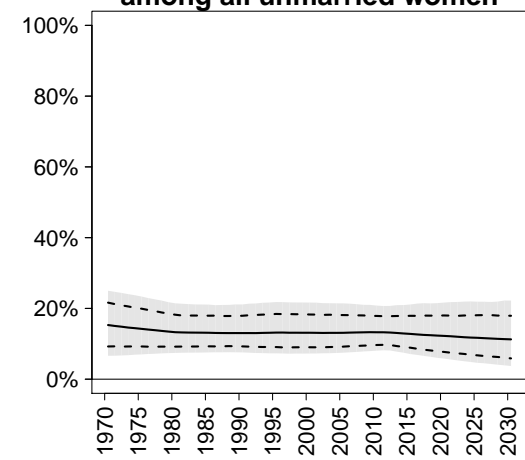

**Total demand**

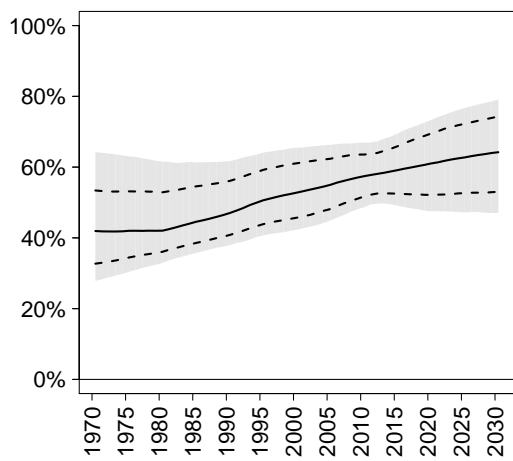

**Demand satisfied (any method)**

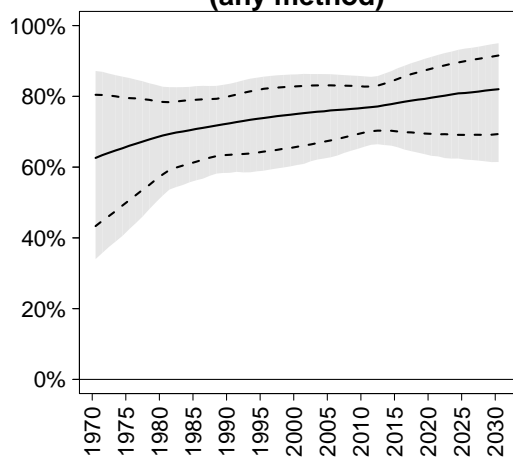

**Demand satisfied (modern methods)**

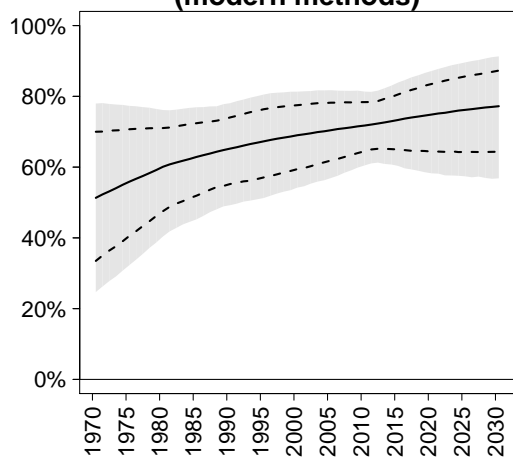

Saint Vincent and the Grenadines --- All women

**CP (any)**

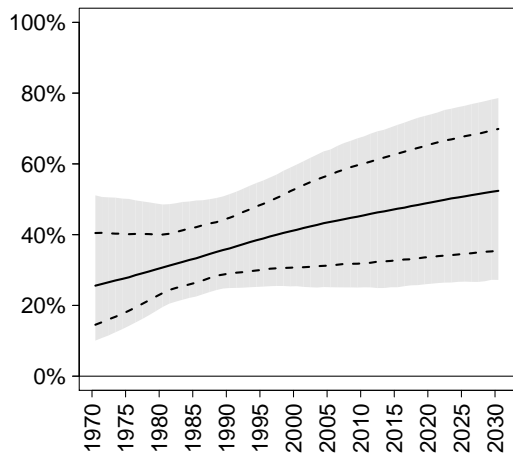

**CP (modern)**

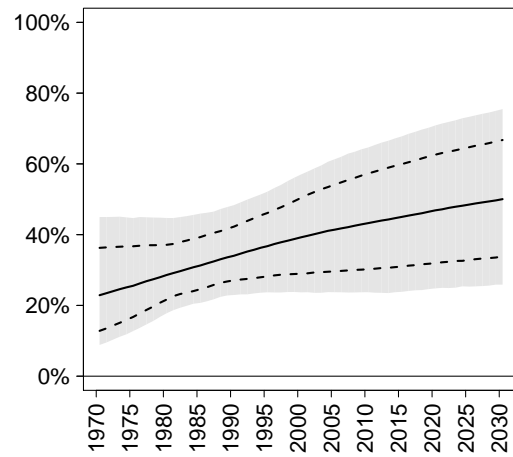

**CP (traditional)**

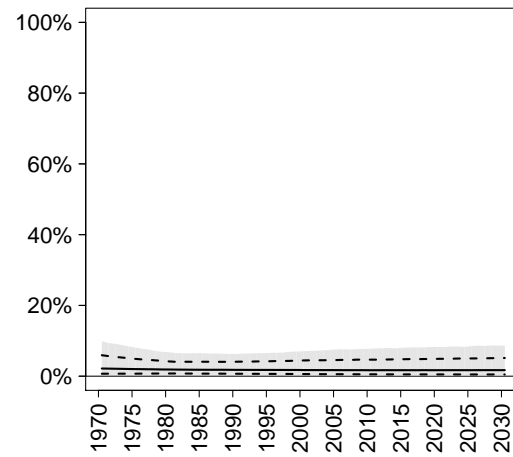

**Unmet need among all unmarried women**

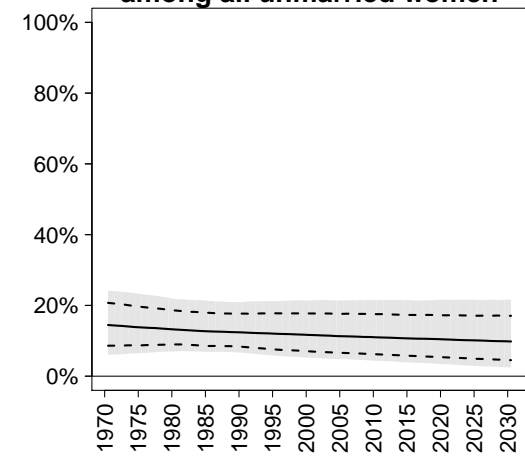

**Total demand**

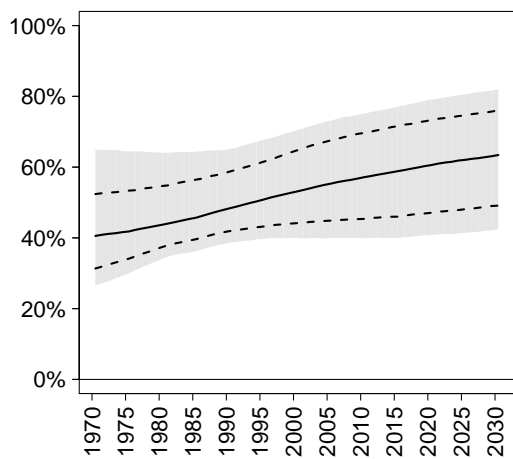

**Demand satisfied (any method)**

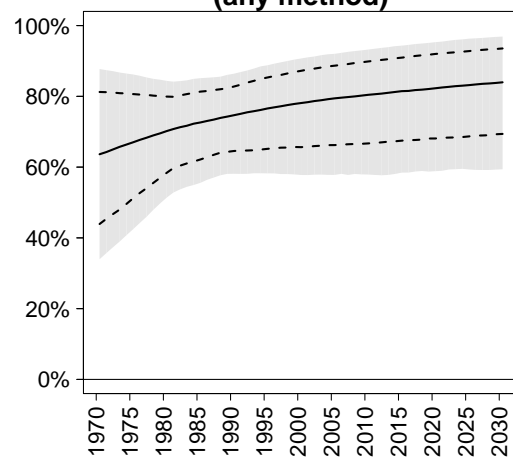

**Demand satisfied (modern methods)**

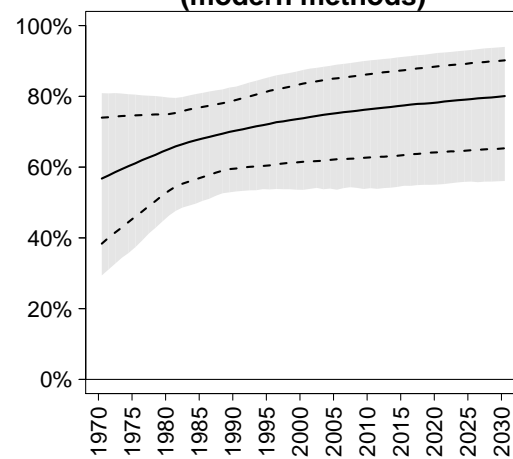

Samoa --- All women

**CP (any)**

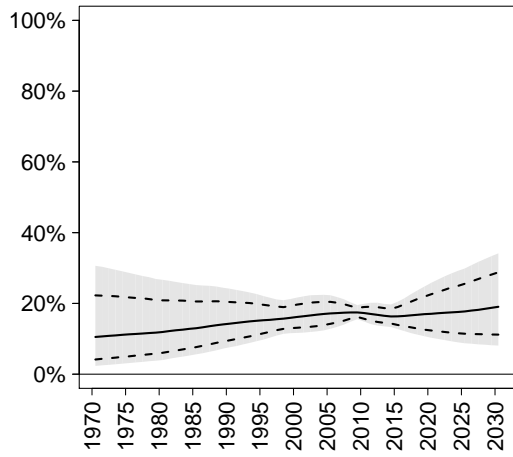

**CP (modern)**

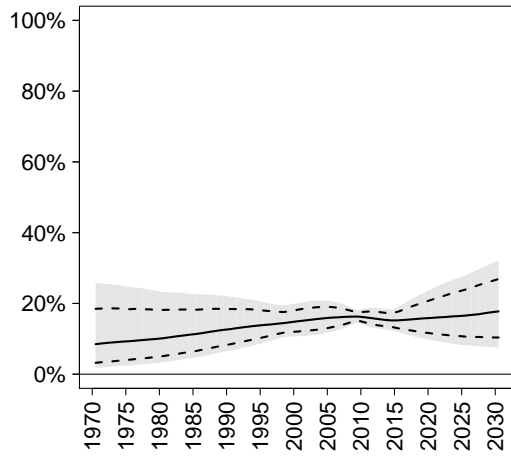

**CP (traditional)**

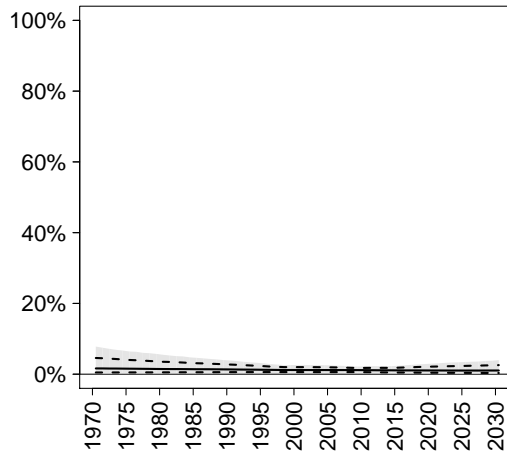

**Unmet need among all unmarried women**

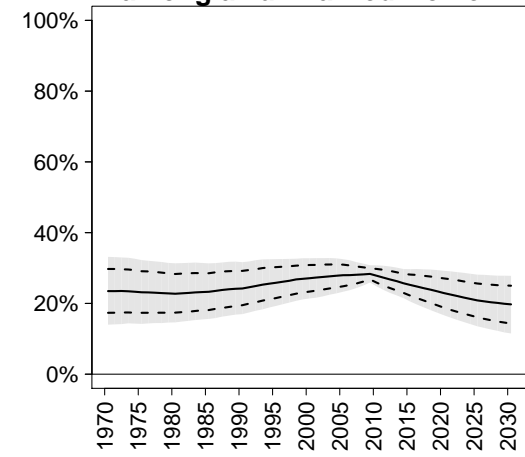

**Total demand**

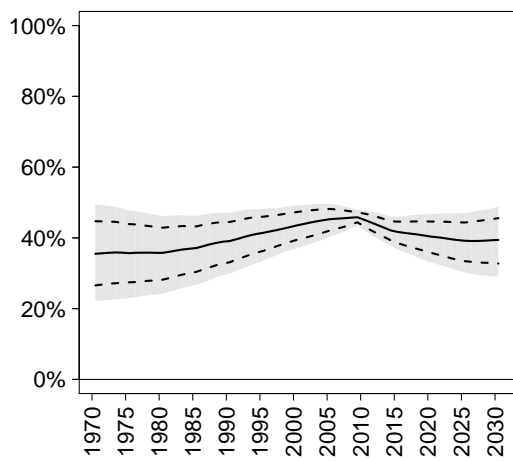

Sao Tome and Principe --- All women

**CP (any)**

**CP (modern)**

**CP (traditional)**

**Unmet need among all unmarried women**

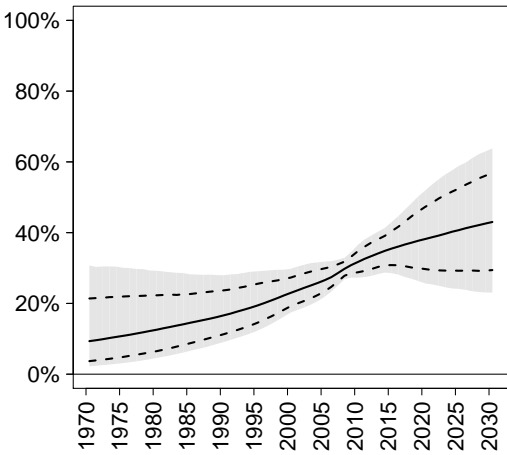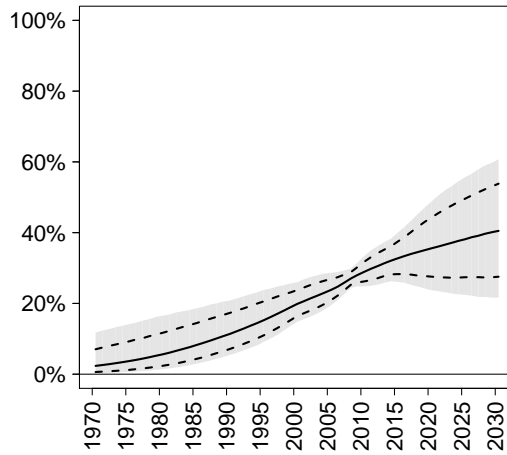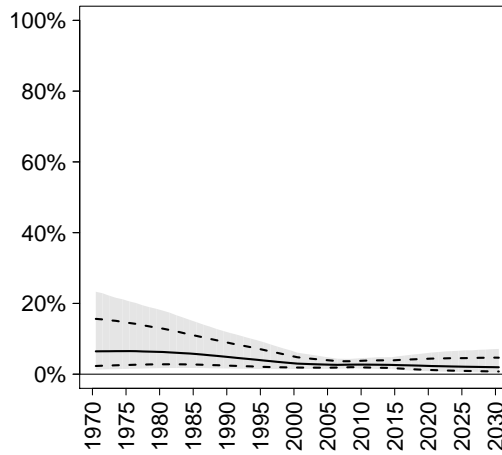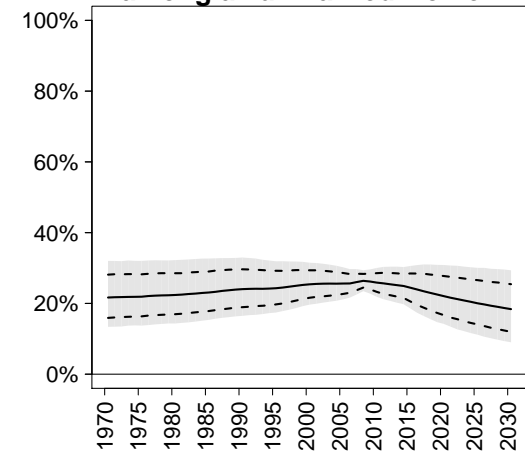

**Total demand**

**Demand satisfied (any method)**

**Demand satisfied (modern methods)**

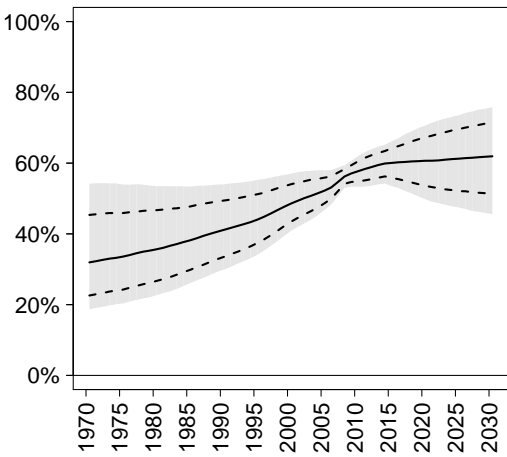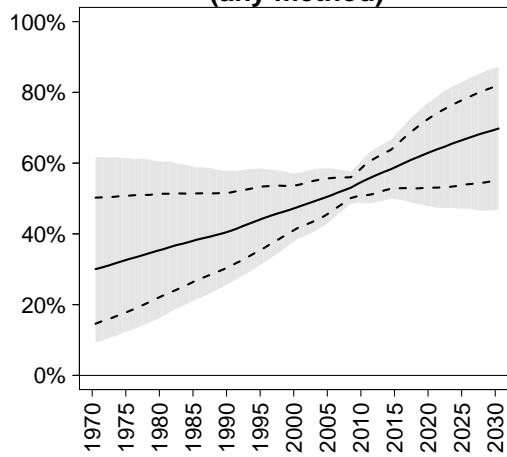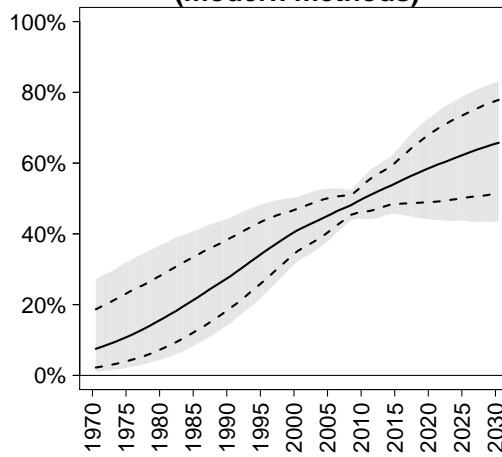

Saudi Arabia --- All women

**CP (any)**

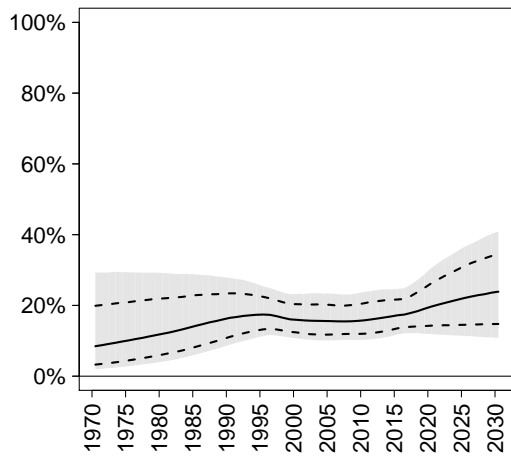

**CP (modern)**

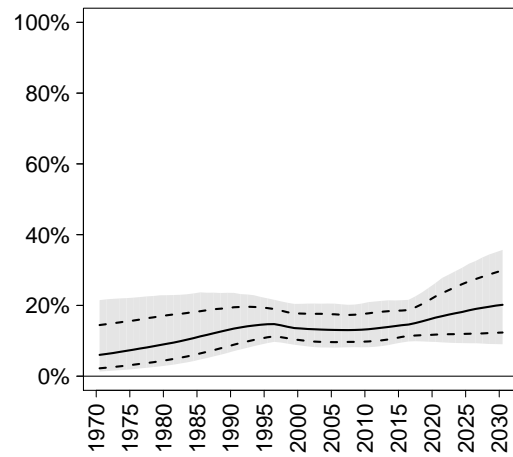

**CP (traditional)**

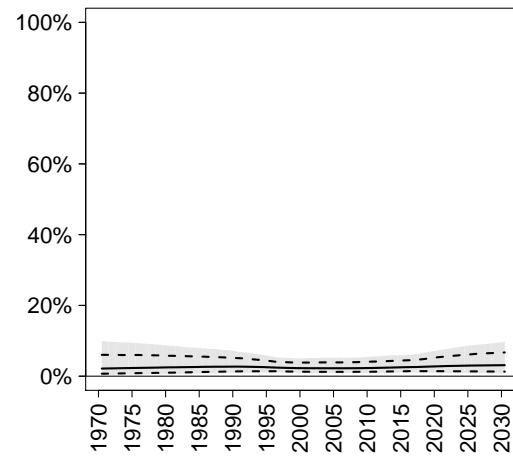

**Unmet need among all unmarried women**

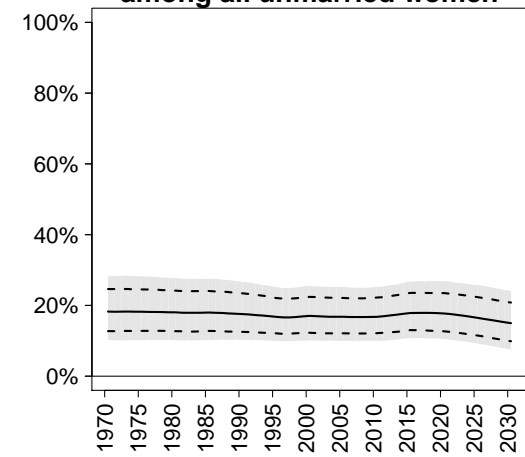

**Total demand**

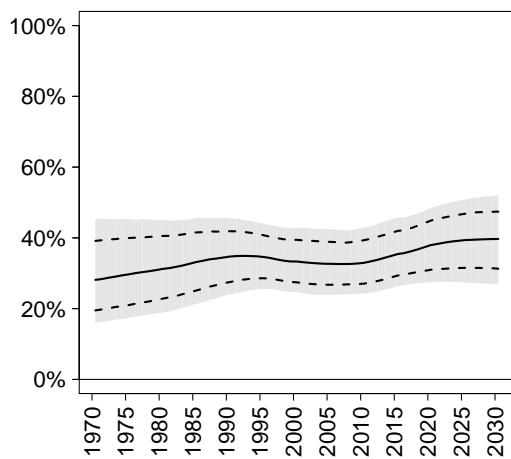

**Demand satisfied (any method)**

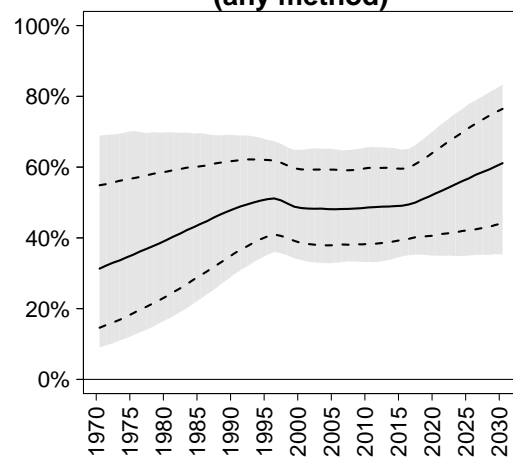

**Demand satisfied (modern methods)**

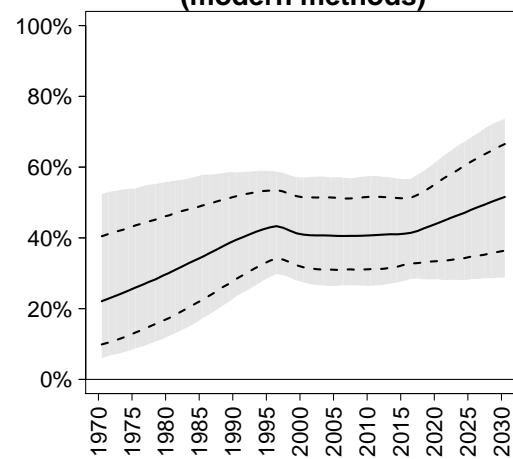



Senegal --- All women

**CP (any)**

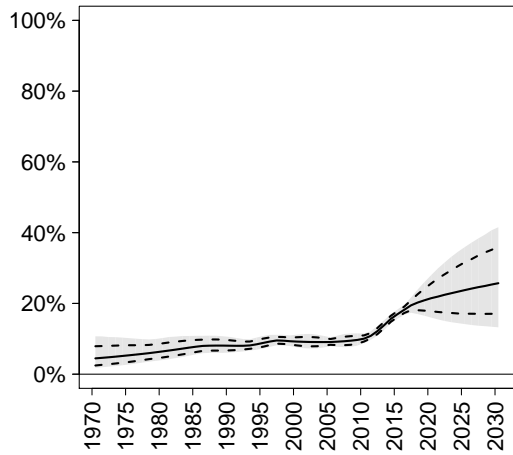

**CP (modern)**

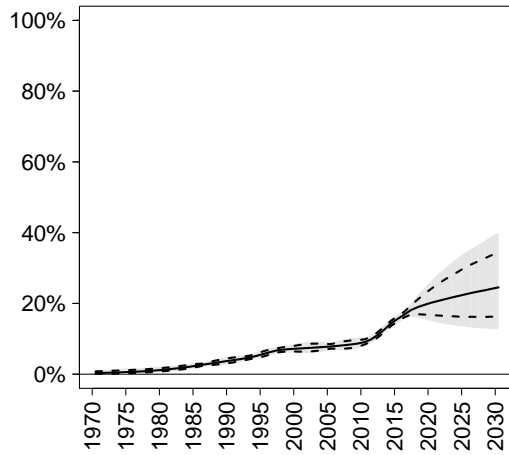

**CP (traditional)**

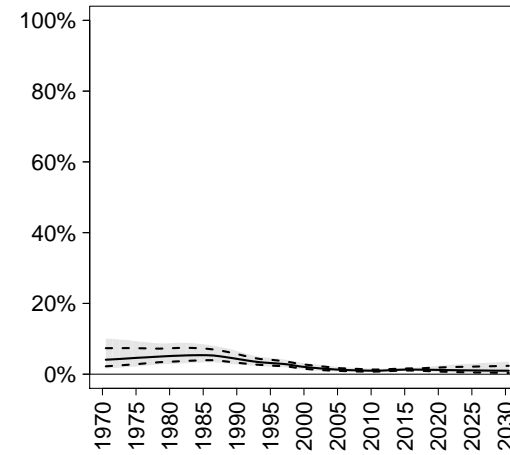

**Unmet need among all unmarried women**

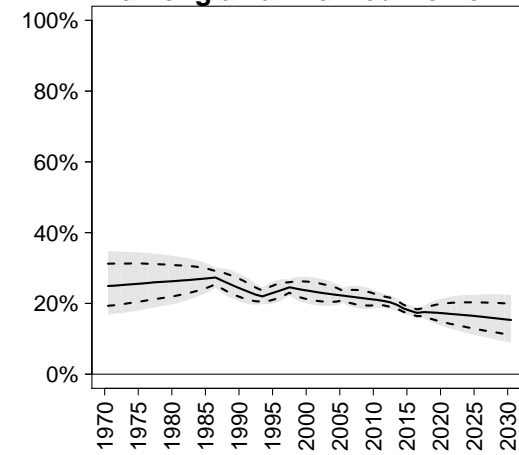

**Total demand**

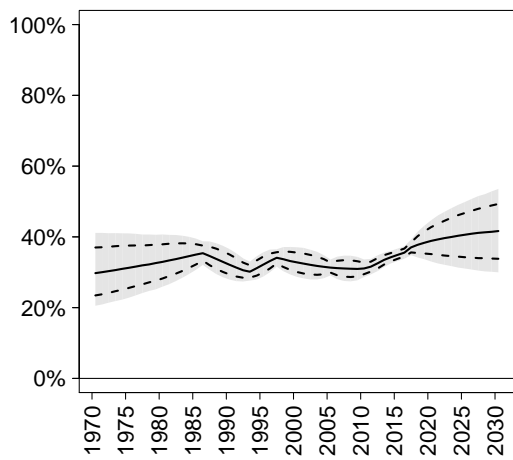

**Demand satisfied (any method)**

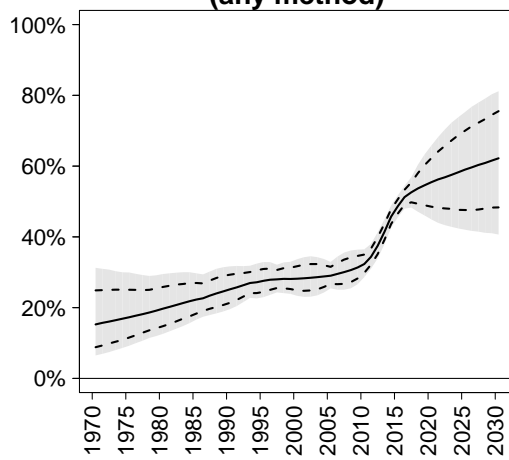

**Demand satisfied (modern methods)**

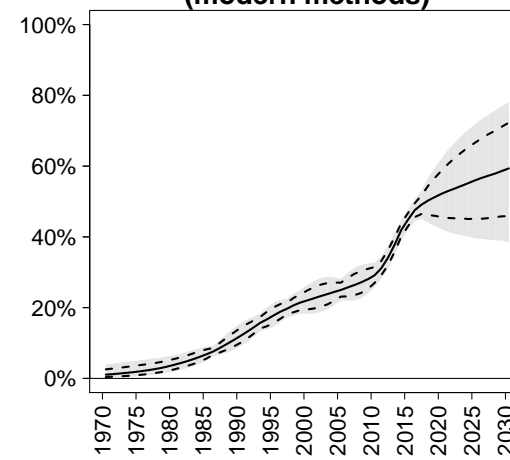

Serbia --- All women

**CP (any)**

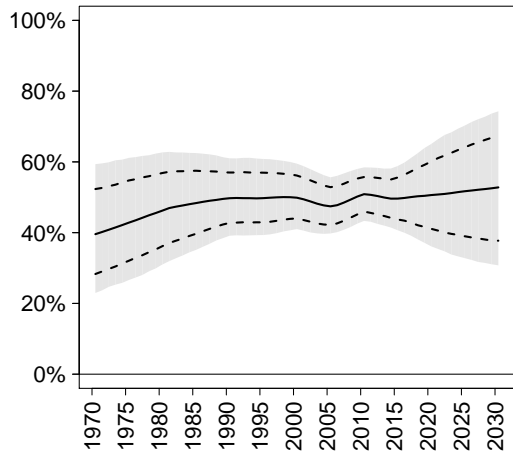

**CP (modern)**

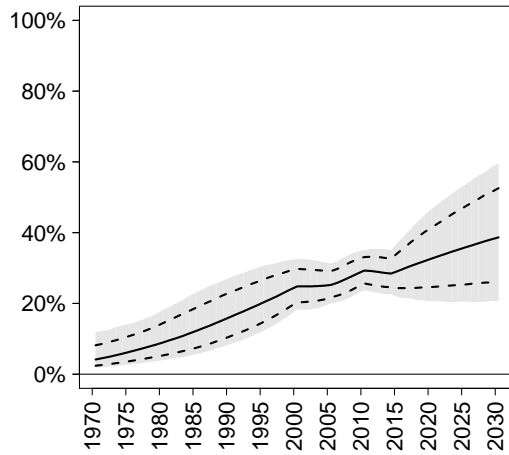

**CP (traditional)**

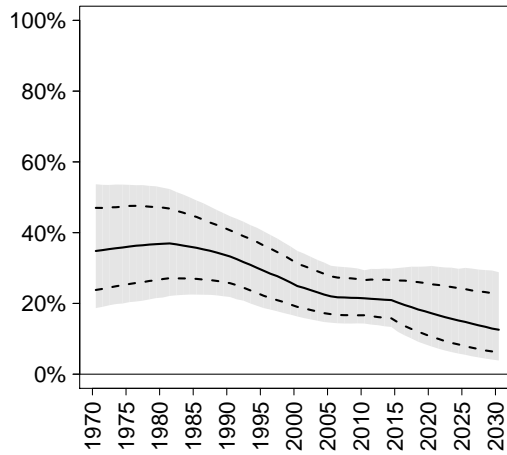

**Unmet need among all unmarried women**

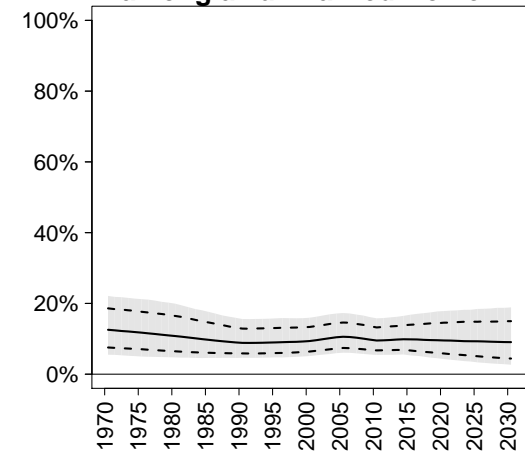

**Total demand**

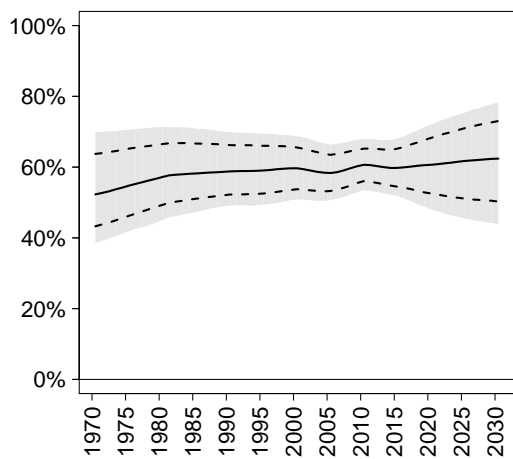

**Demand satisfied (any method)**

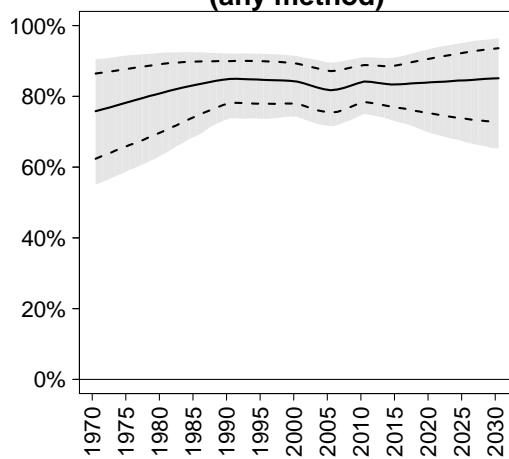

**Demand satisfied (modern methods)**

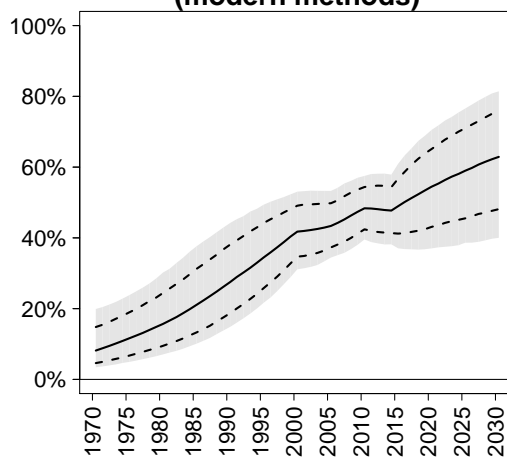

Sierra Leone --- All women

**CP (any)**

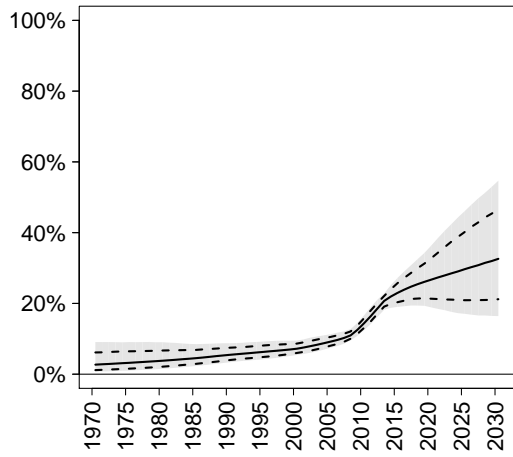

**CP (modern)**

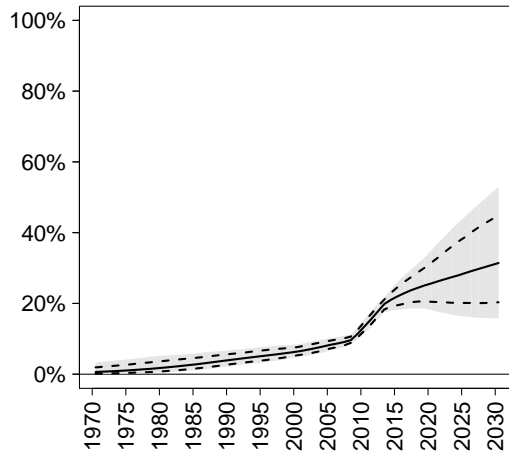

**CP (traditional)**

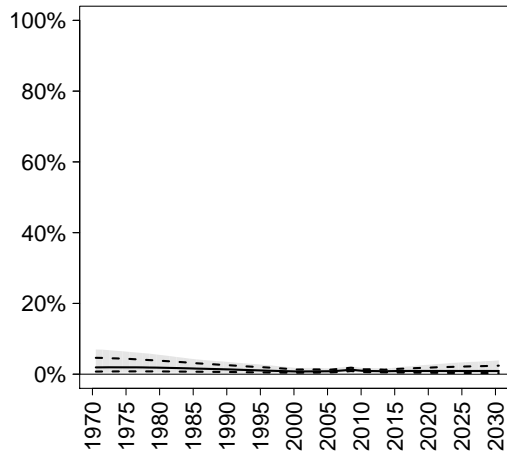

**Unmet need among all unmarried women**

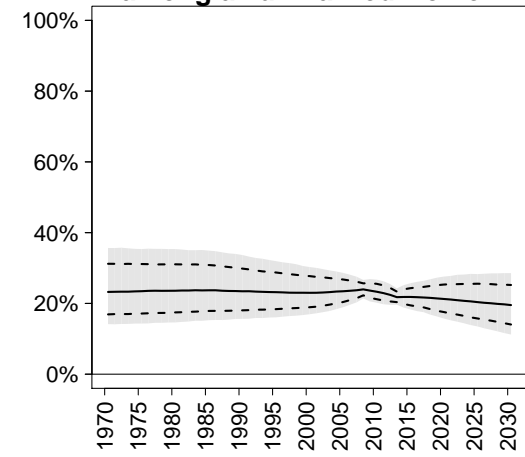

**Total demand**

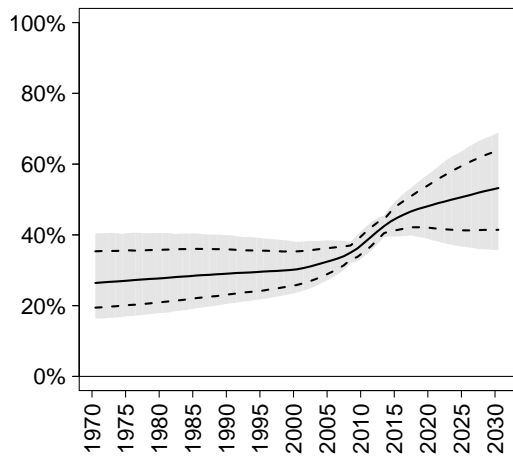

**Demand satisfied (any method)**

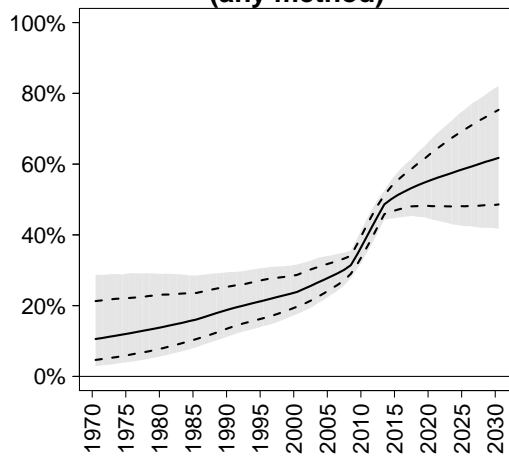

**Demand satisfied (modern methods)**

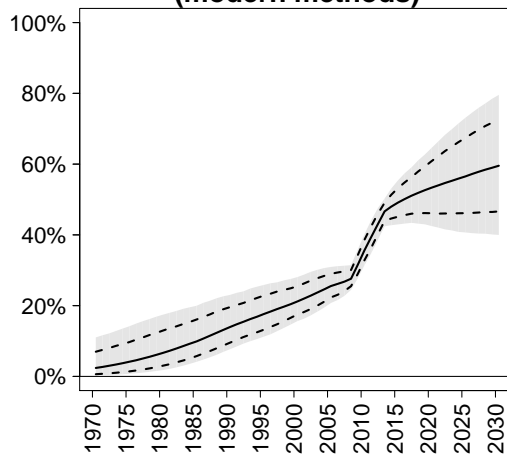

Singapore --- All women

**CP (any)**

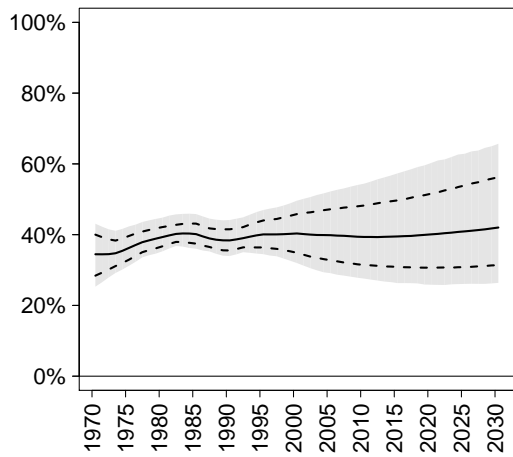

**CP (modern)**

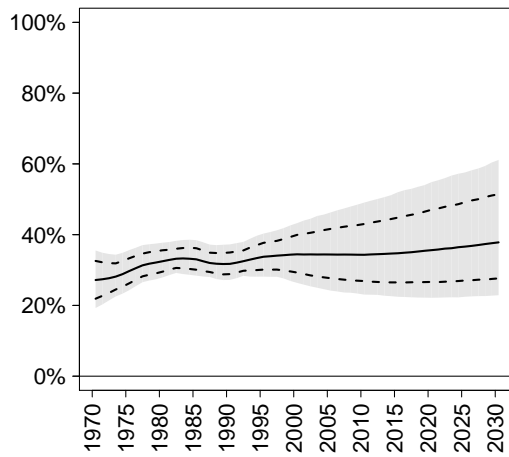

**CP (traditional)**

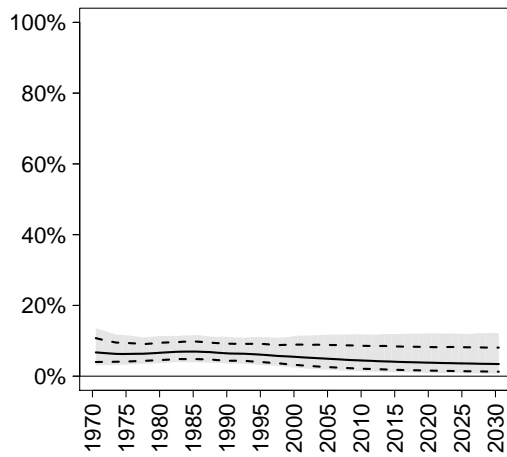

**Unmet need among all unmarried women**

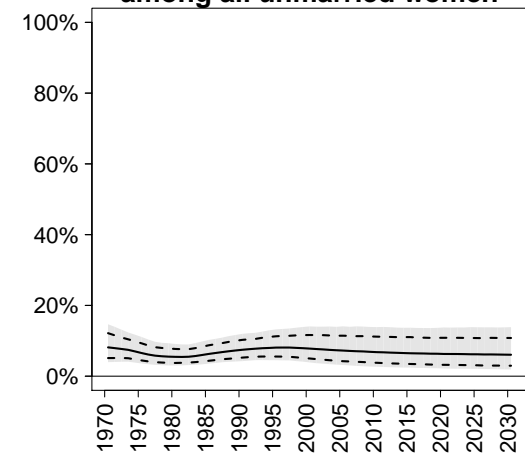

**Total demand**

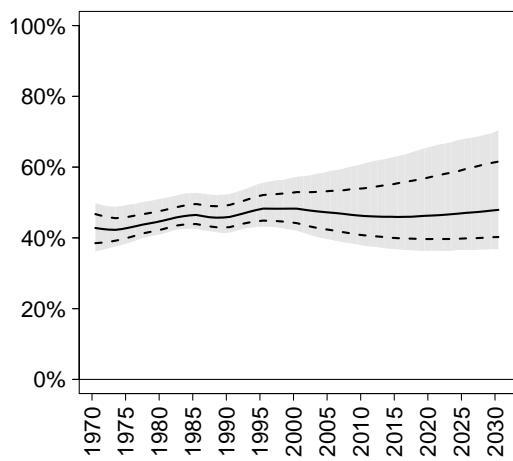

**Demand satisfied (any method)**

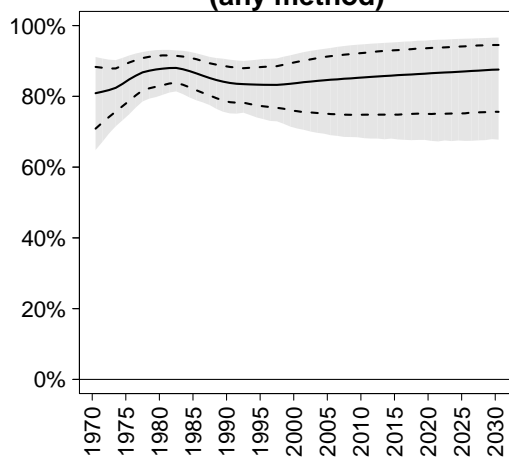

**Demand satisfied (modern methods)**

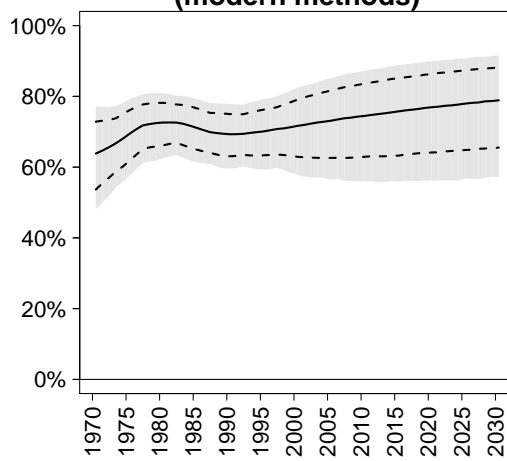

Slovakia --- All women

**CP (any)**

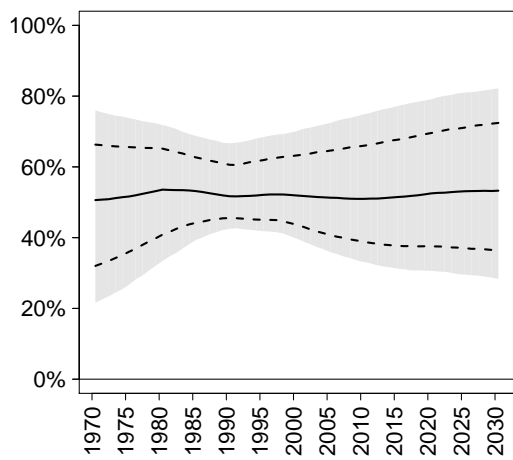

**CP (modern)**

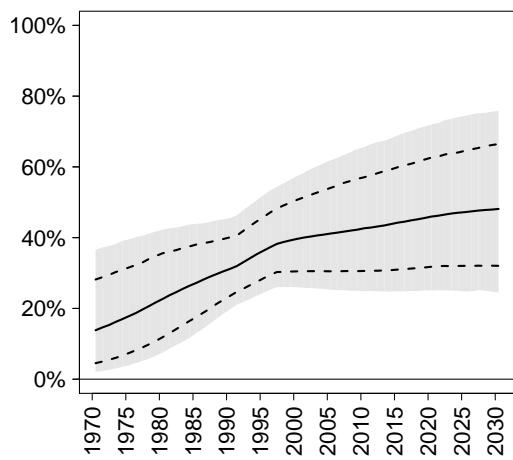

**CP (traditional)**

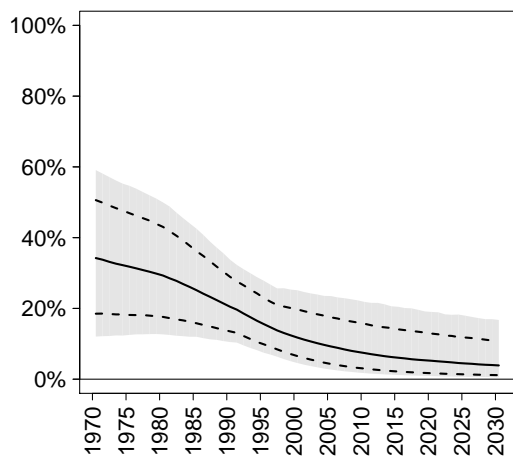

**Unmet need among all unmarried women**

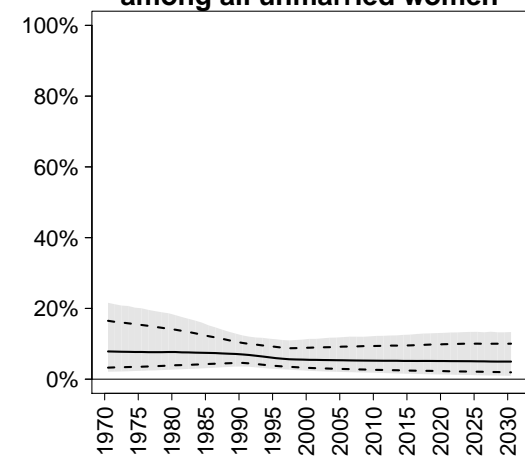

**Total demand**

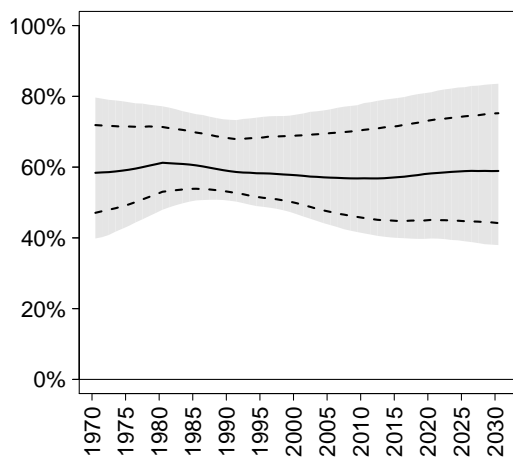

**Demand satisfied (any method)**

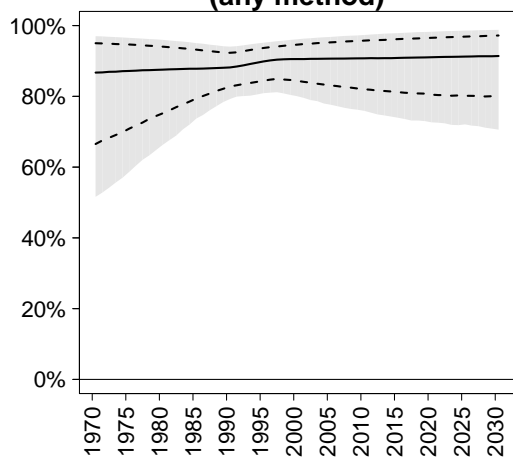

**Demand satisfied (modern methods)**

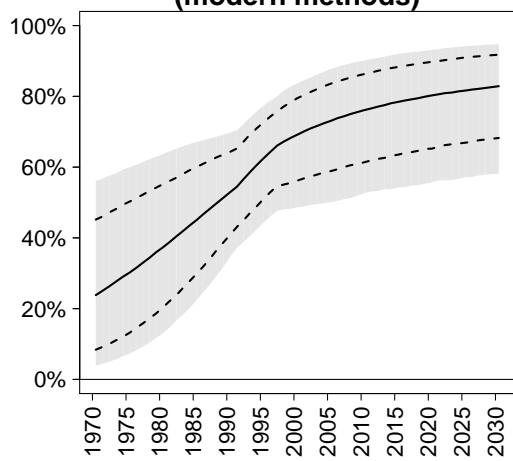

Slovenia --- All women

**CP (any)**

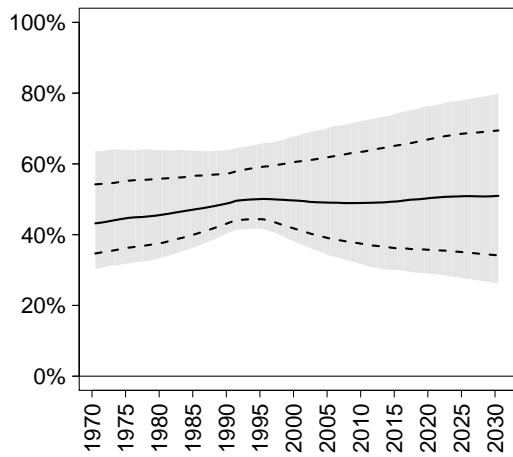

**CP (modern)**

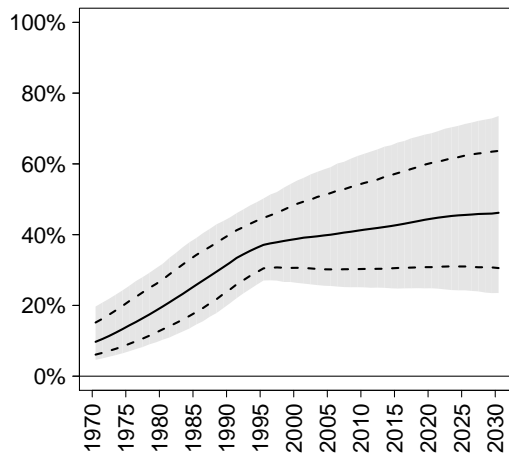

**CP (traditional)**

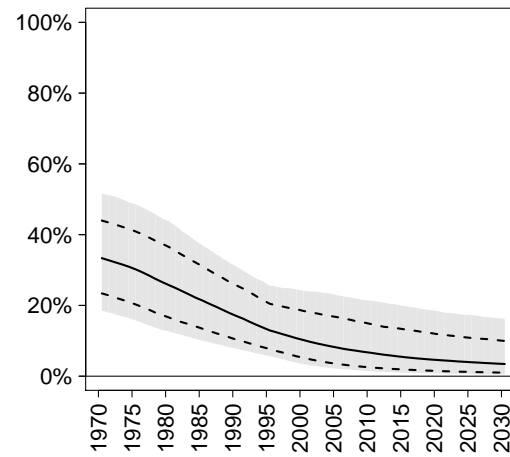

**Unmet need among all unmarried women**

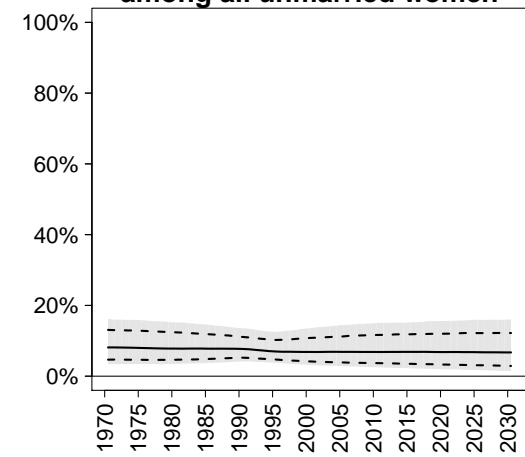

**Total demand**

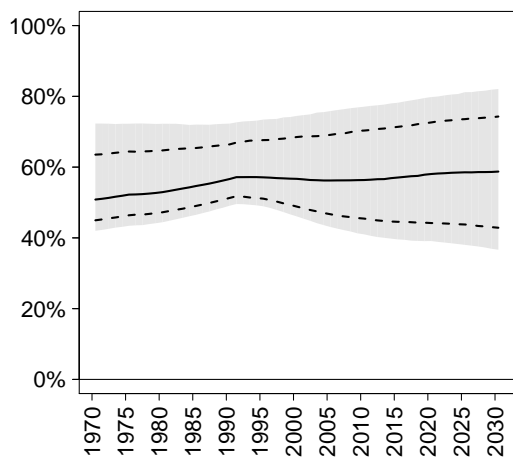

**Demand satisfied (any method)**

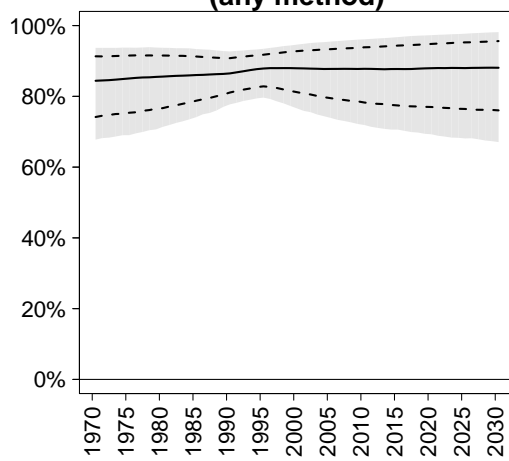

**Demand satisfied (modern methods)**

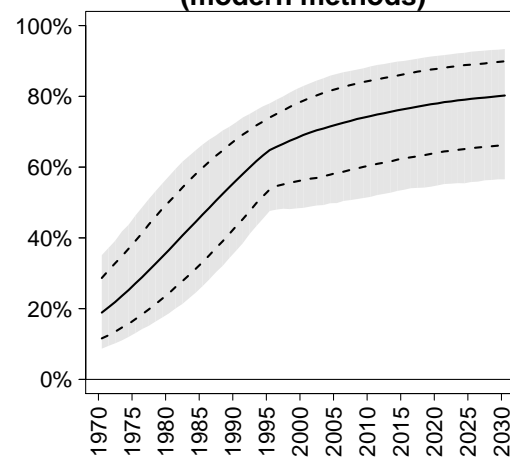

Solomon Islands --- All women

**CP (any)**

**CP (modern)**

**CP (traditional)**

**Unmet need  
among all unmarried women**

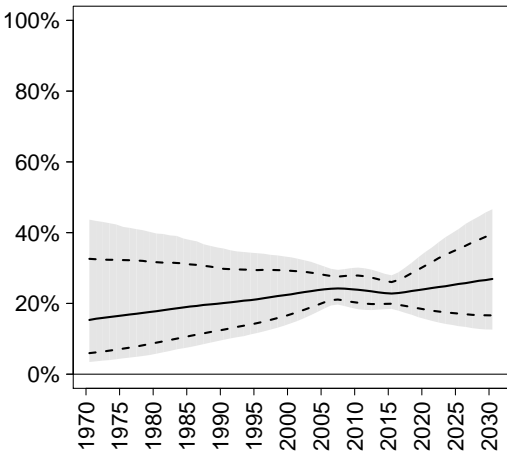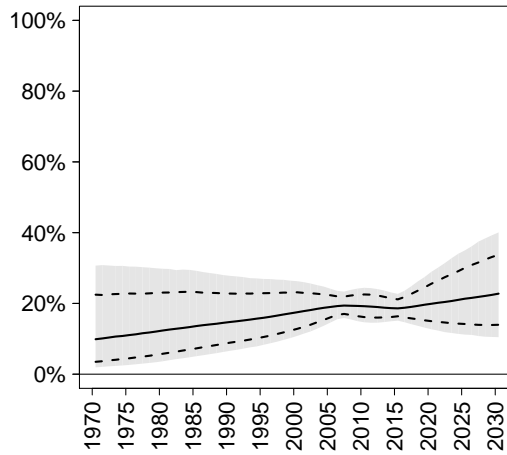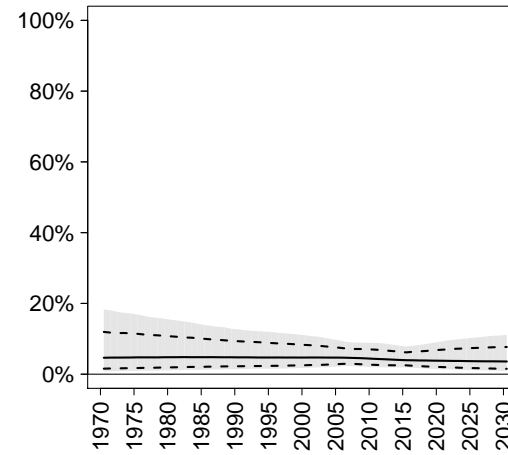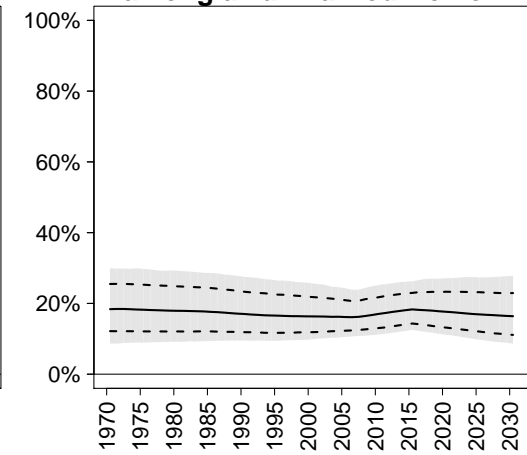

**Total demand**

**Demand satisfied  
(any method)**

**Demand satisfied  
(modern methods)**

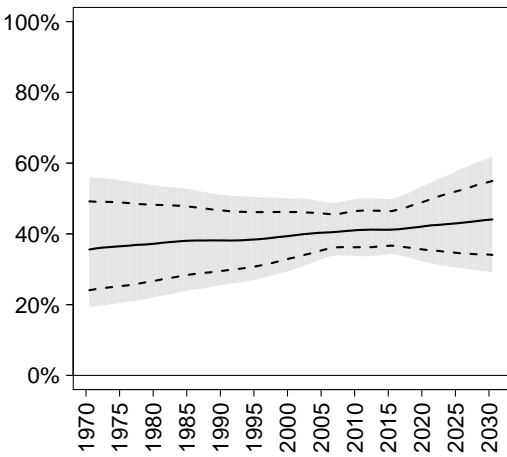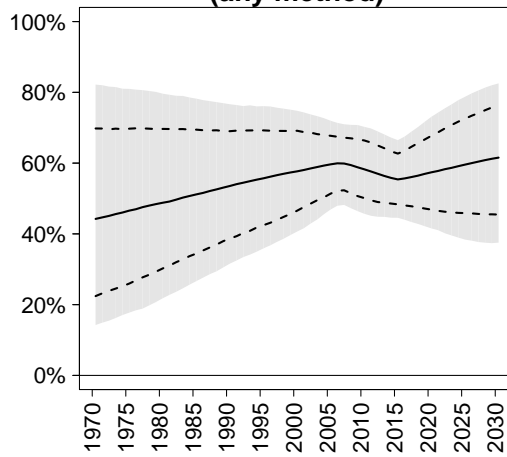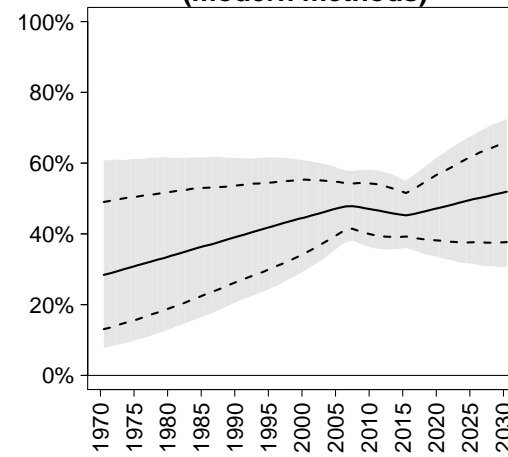

Somalia --- All women

**CP (any)**

**CP (modern)**

**CP (traditional)**

**Unmet need  
among all unmarried women**

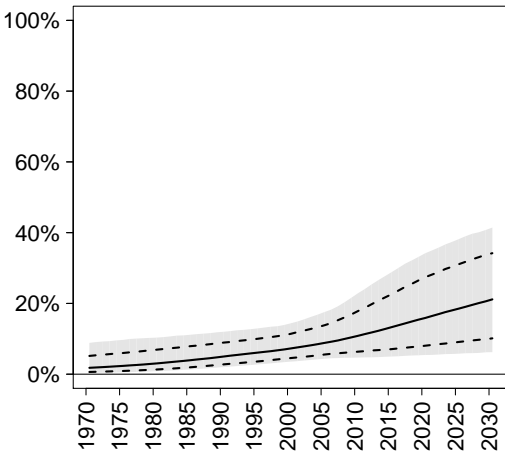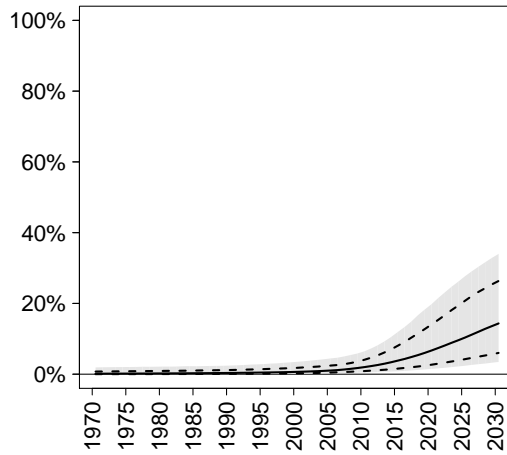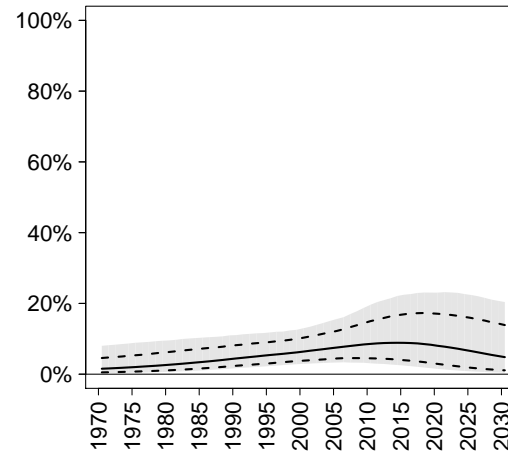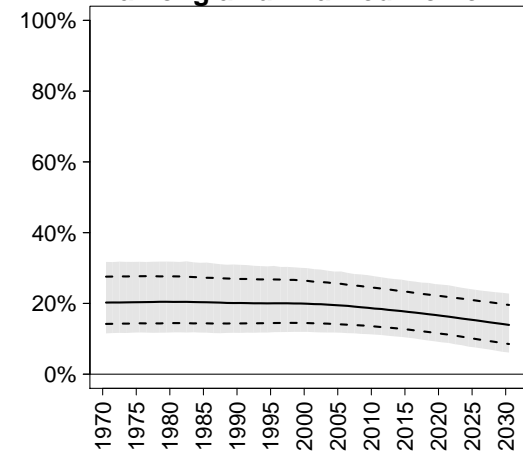

**Total demand**

**Demand satisfied  
(any method)**

**Demand satisfied  
(modern methods)**

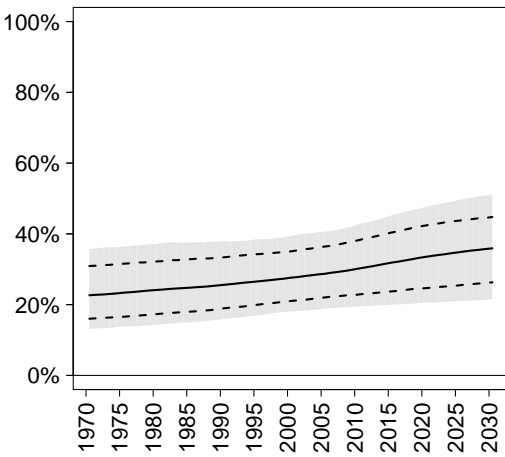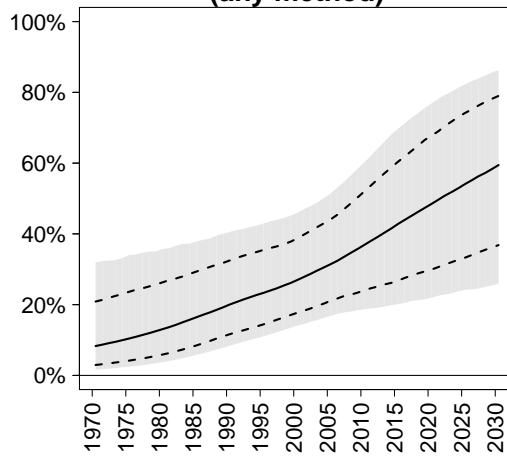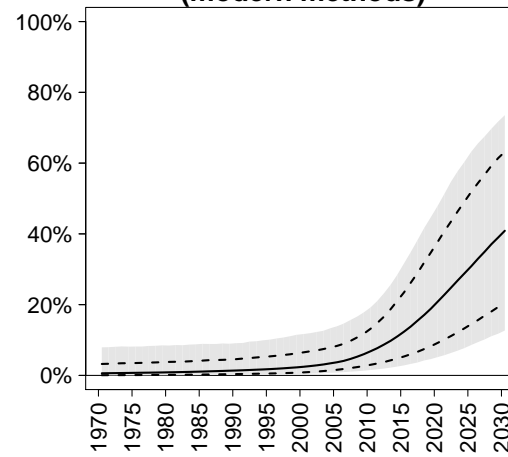



South Africa --- All women

**CP (any)**

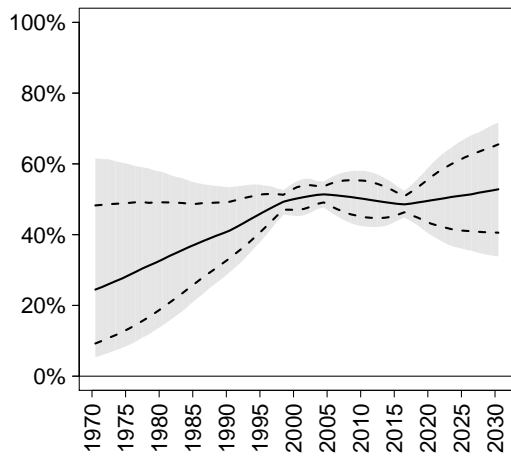

**CP (modern)**

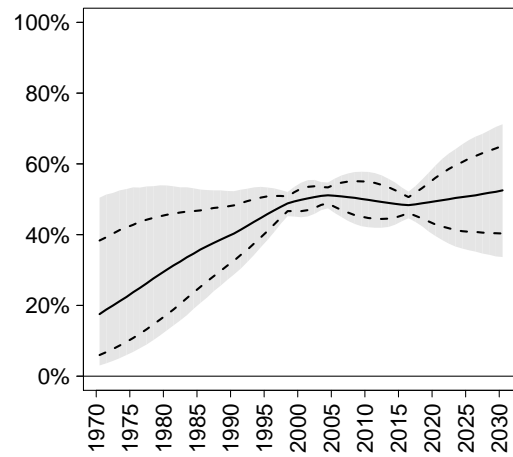

**CP (traditional)**

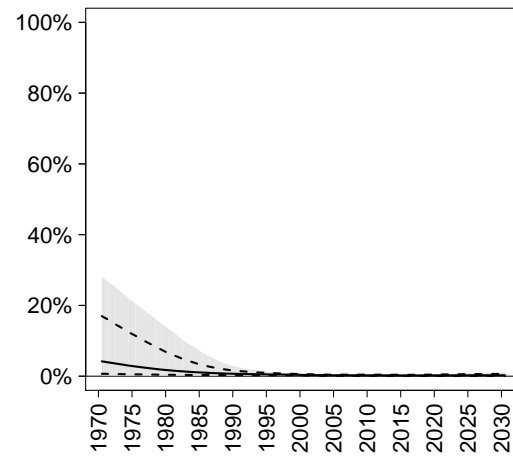

**Unmet need among all unmarried women**

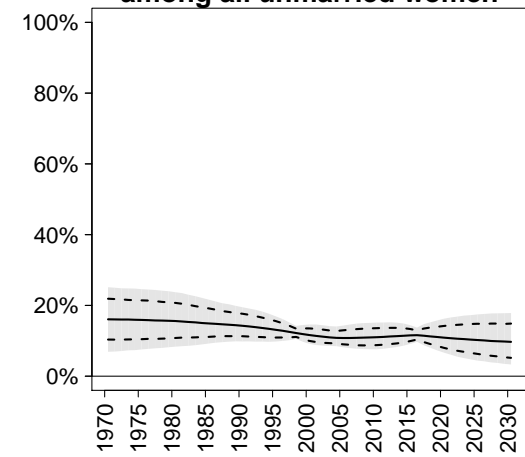

**Total demand**

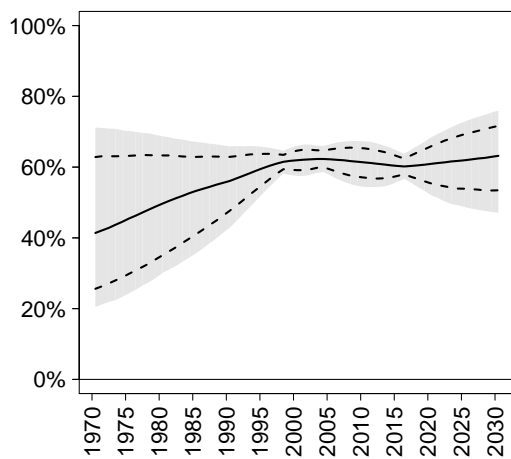

South Sudan --- All women

**CP (any)**

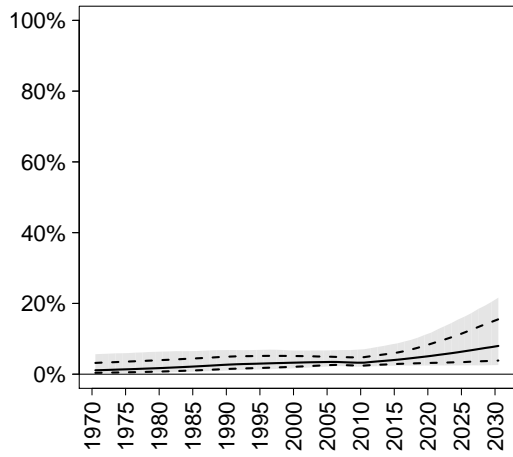

**CP (modern)**

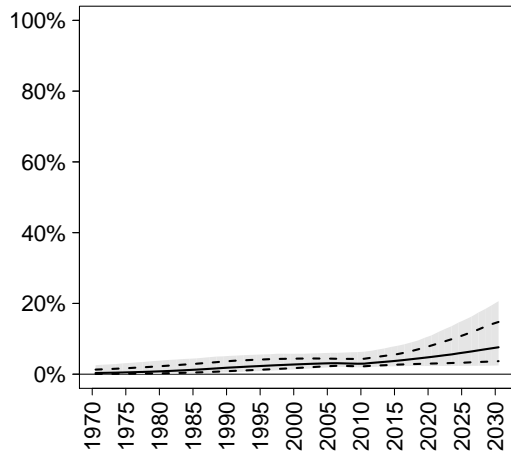

**CP (traditional)**

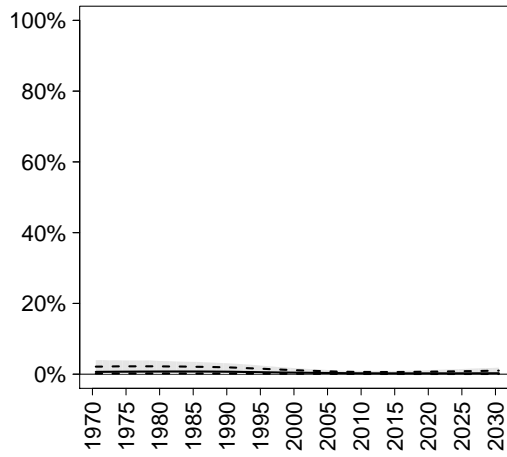

**Unmet need among all unmarried women**

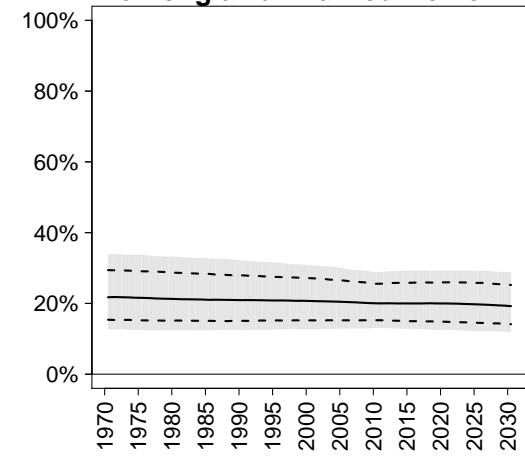

**Total demand**

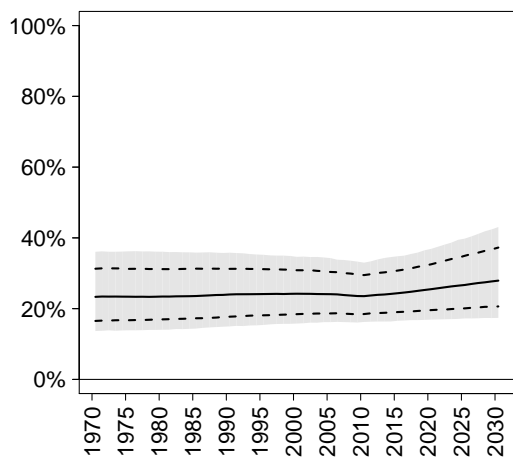

Spain --- All women

**CP (any)**

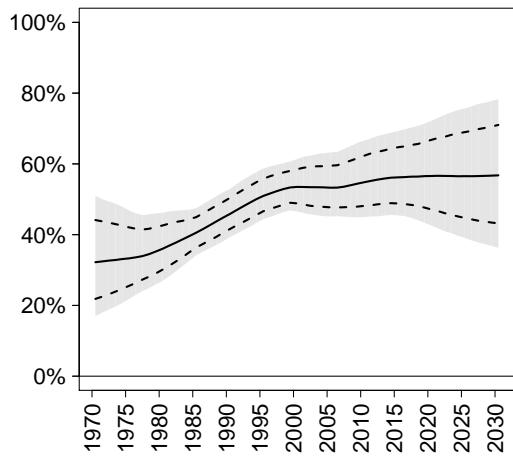

**CP (modern)**

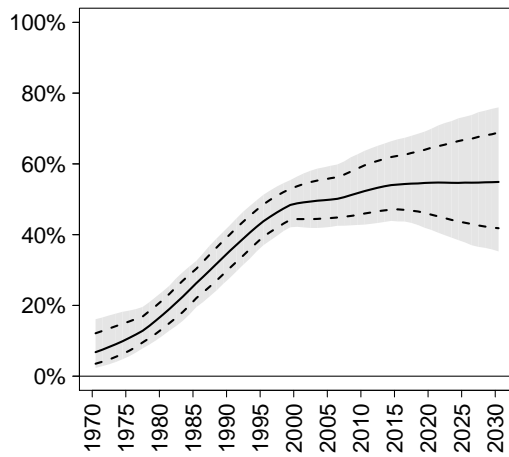

**CP (traditional)**

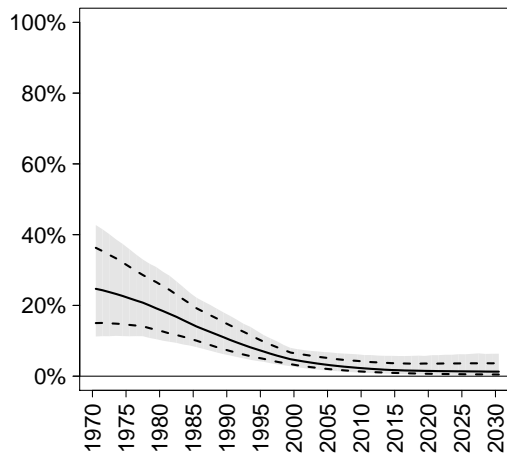

**Unmet need among all unmarried women**

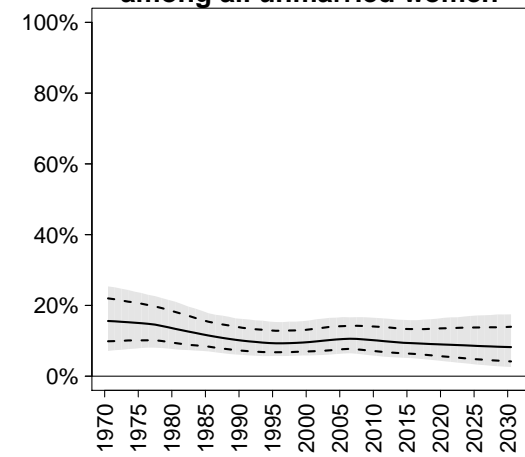

**Total demand**

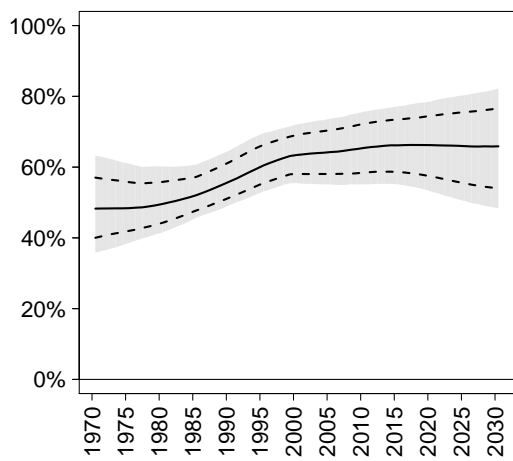

**Demand satisfied (any method)**

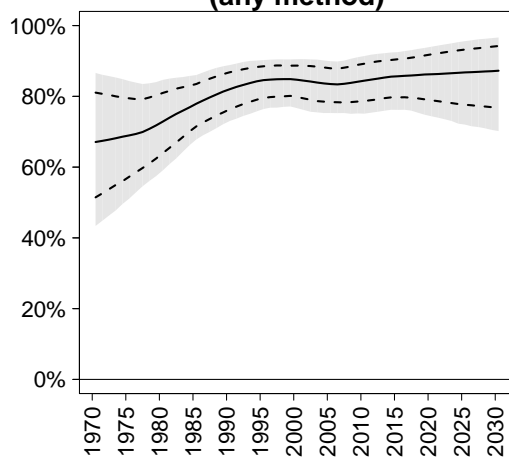

**Demand satisfied (modern methods)**

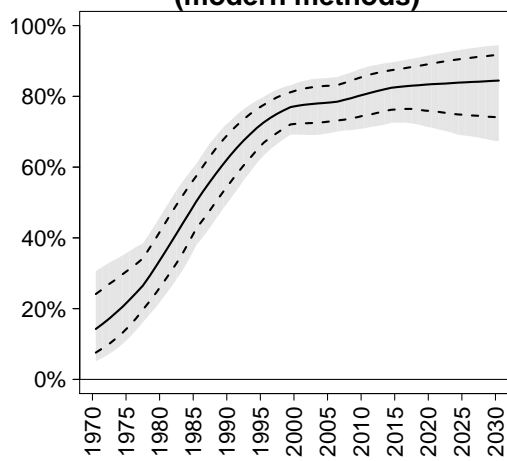

Sri Lanka --- All women

**CP (any)**

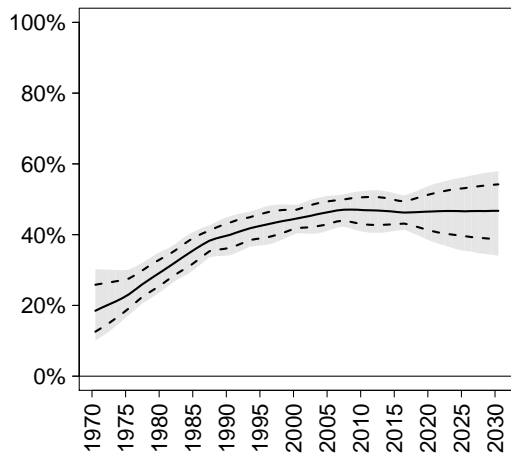

**CP (modern)**

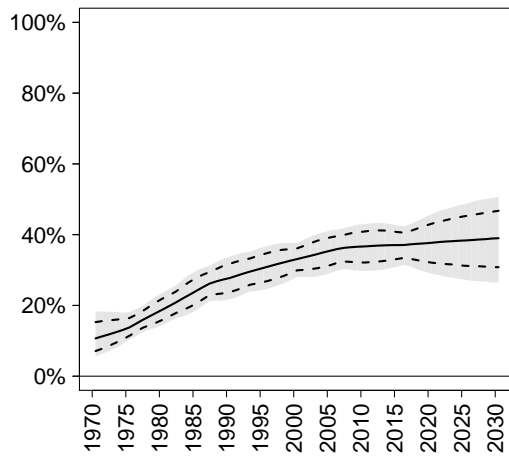

**CP (traditional)**

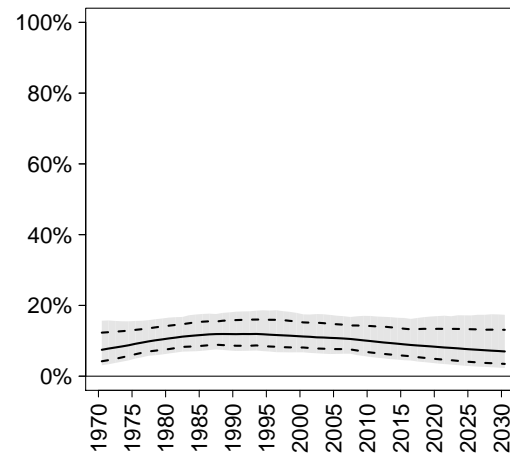

**Unmet need among all unmarried women**

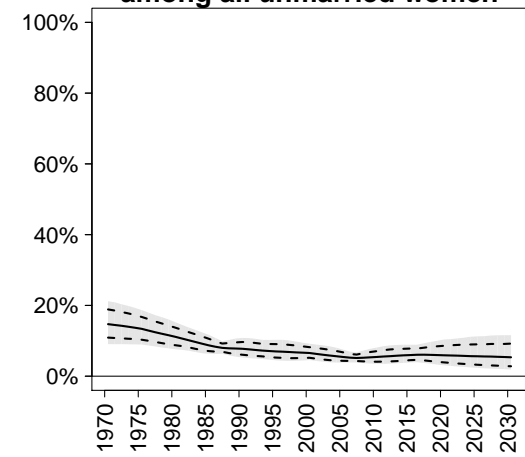

**Total demand**

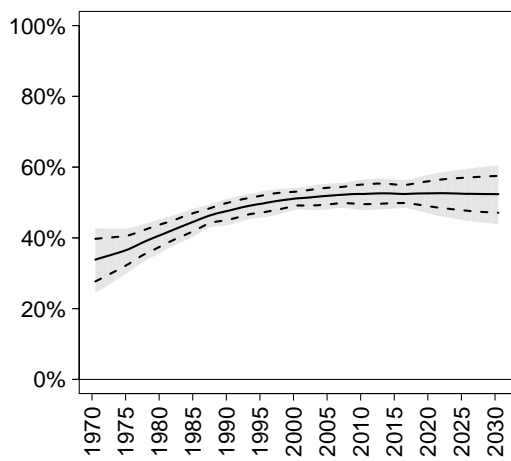

**Demand satisfied (any method)**

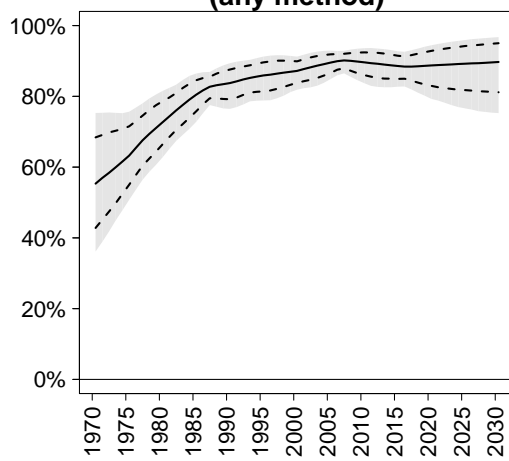

**Demand satisfied (modern methods)**

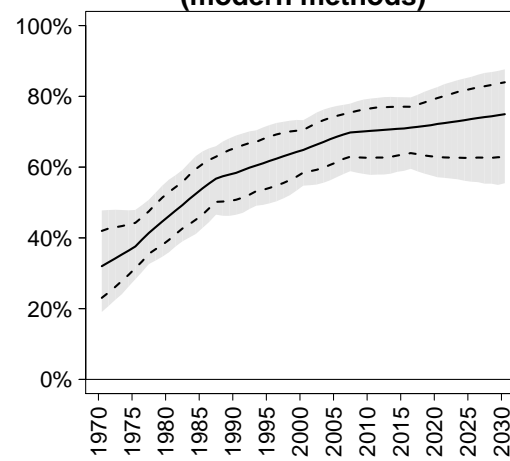

State of Palestine --- All women

**CP (any)**

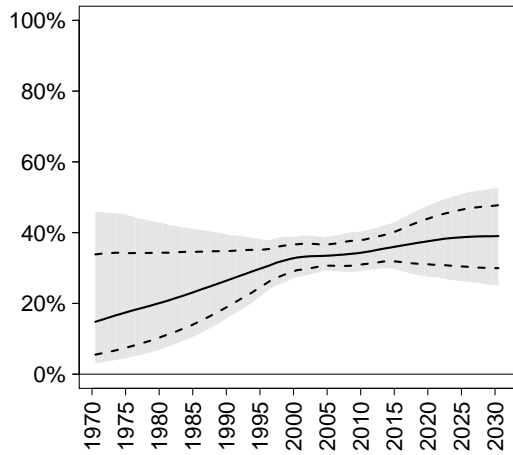

**CP (modern)**

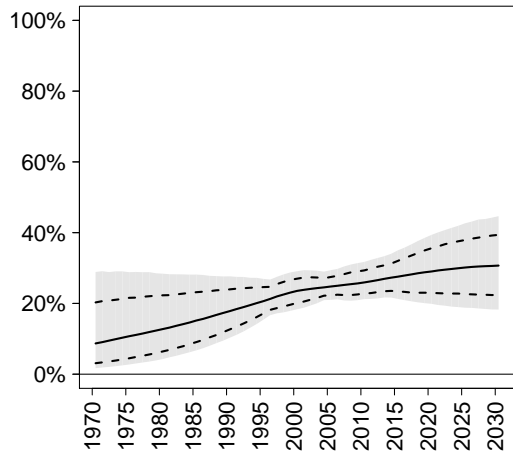

**CP (traditional)**

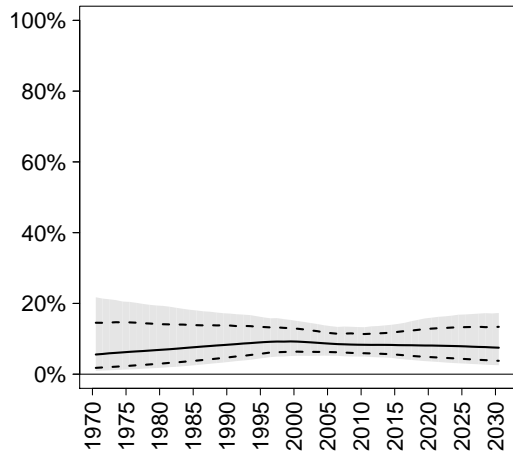

**Unmet need among all unmarried women**

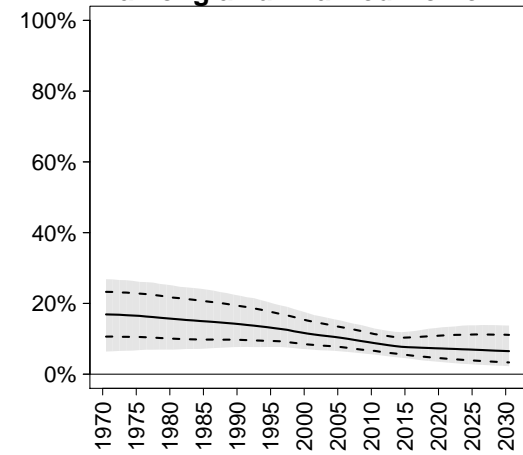

**Total demand**

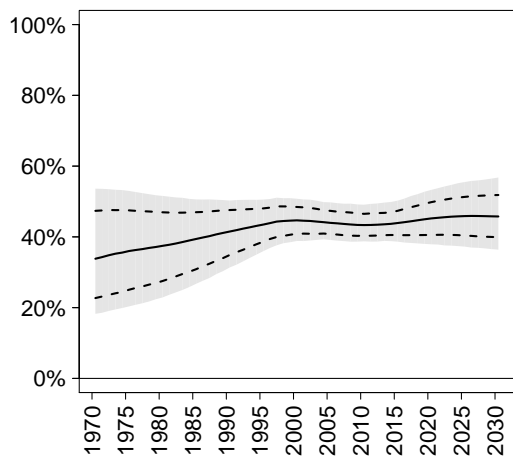

**Demand satisfied (any method)**

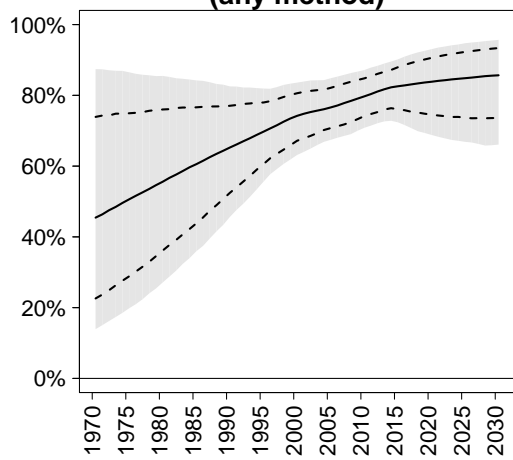

**Demand satisfied (modern methods)**

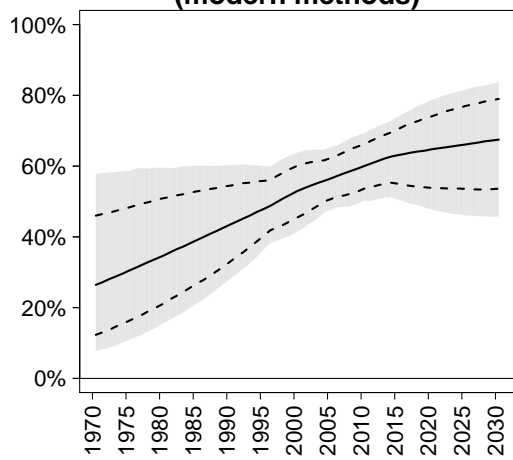

Sudan --- All women

**CP (any)**

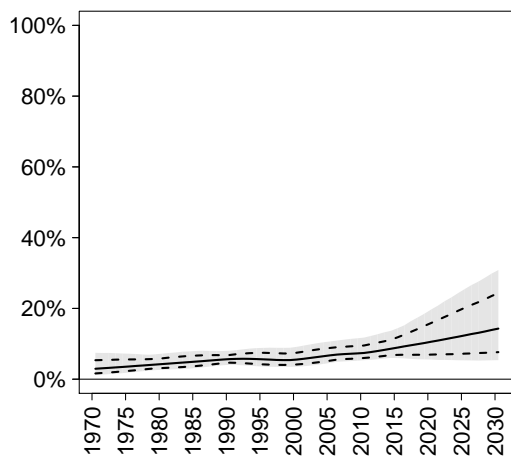

**CP (modern)**

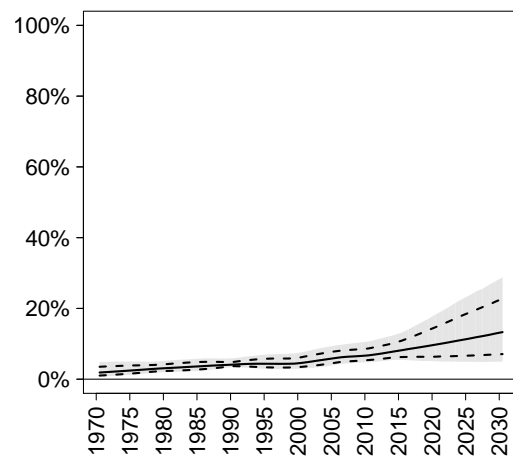

**CP (traditional)**

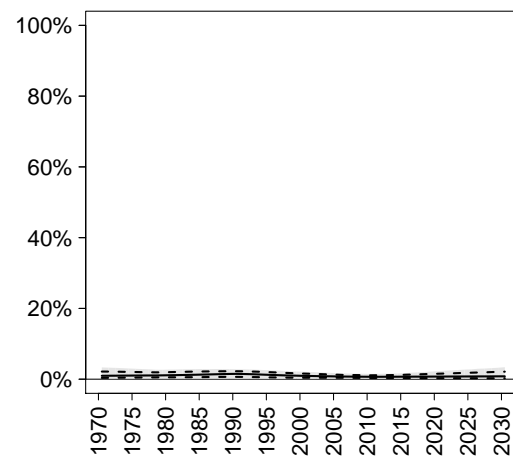

**Unmet need among all unmarried women**

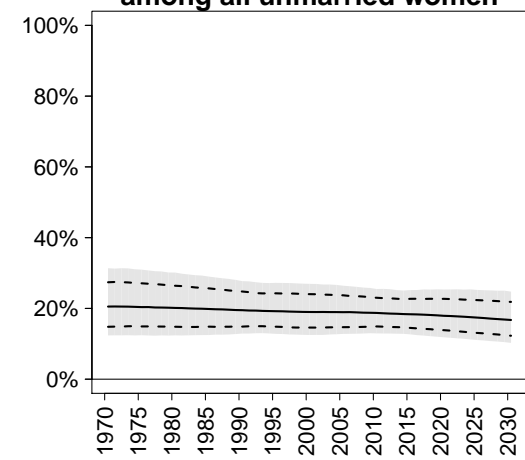

**Total demand**

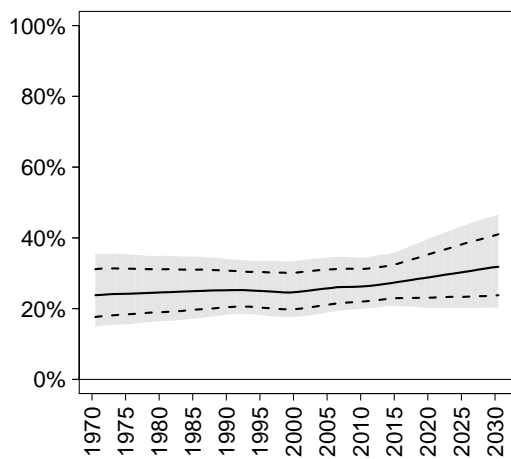

Suriname --- All women

**CP (any)**

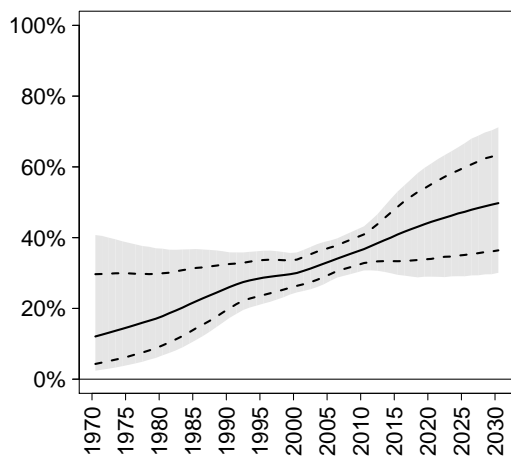

**CP (modern)**

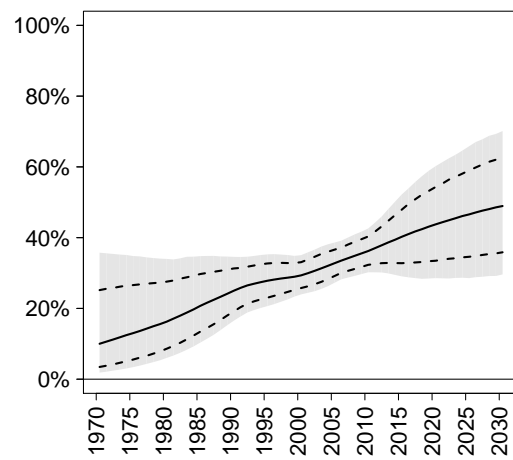

**CP (traditional)**

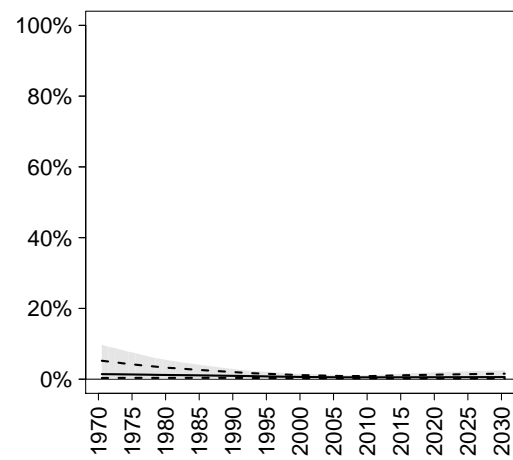

**Unmet need among all unmarried women**

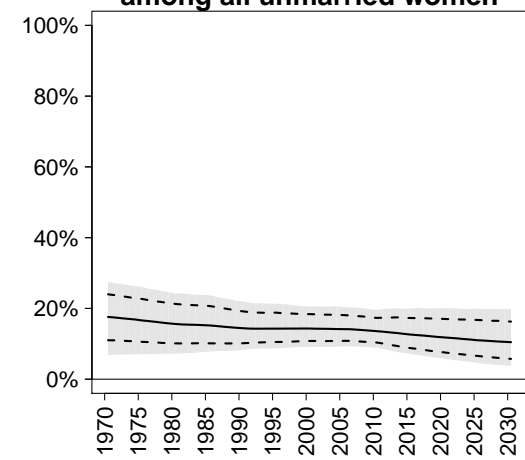

**Total demand**

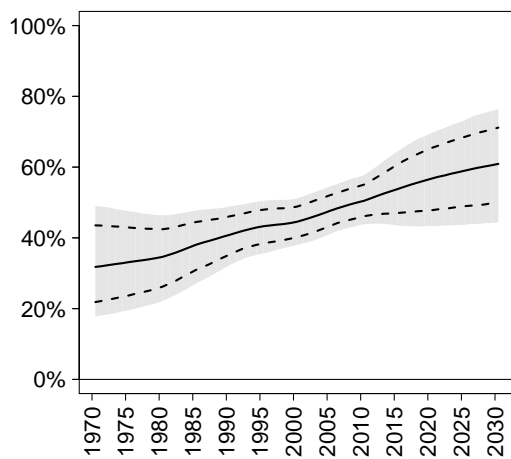

**Demand satisfied (any method)**

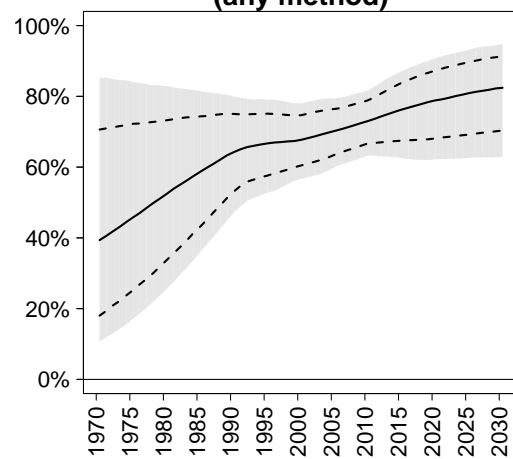

**Demand satisfied (modern methods)**

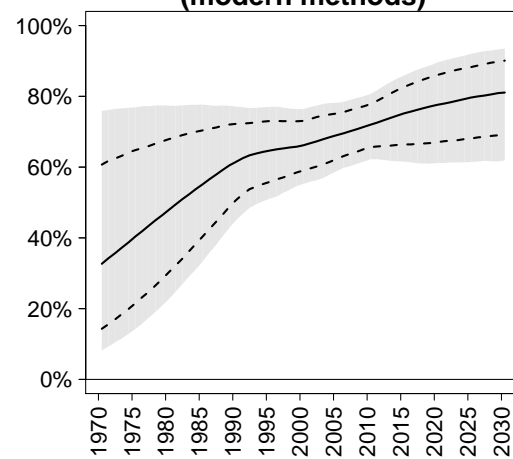

Sweden --- All women

**CP (any)**

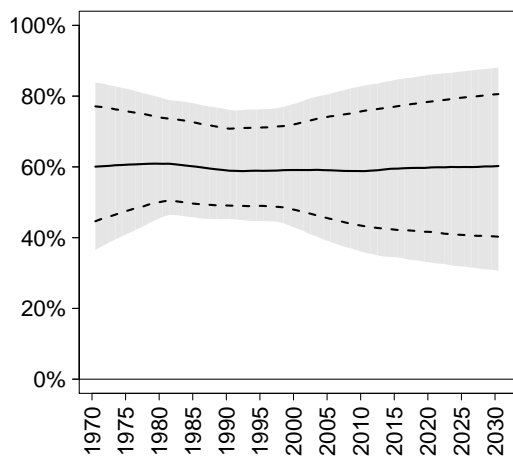

**CP (modern)**

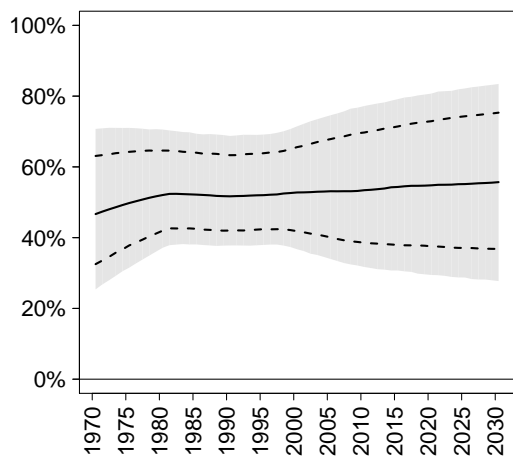

**CP (traditional)**

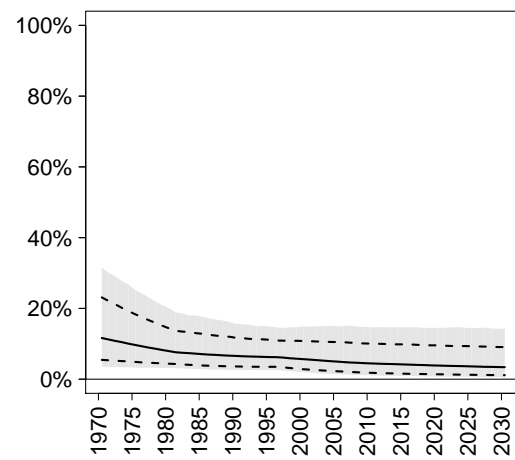

**Unmet need among all unmarried women**

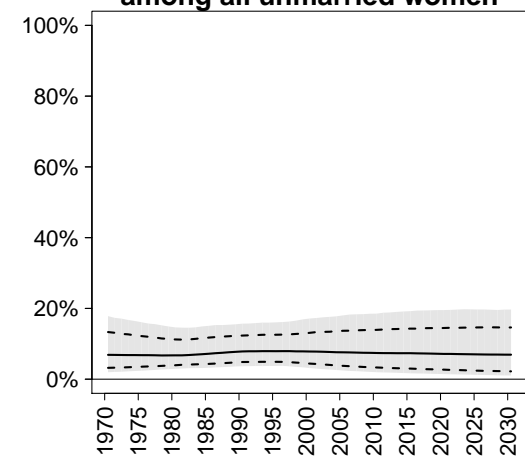

**Total demand**

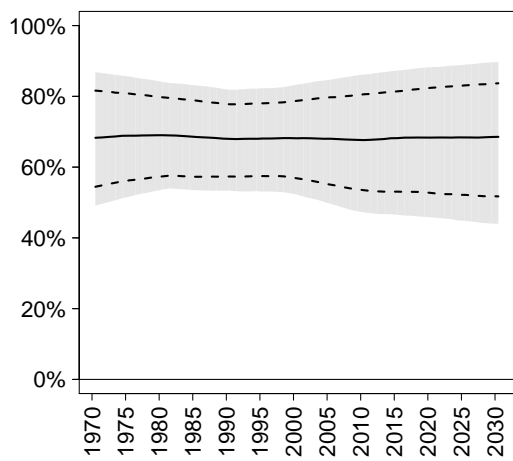

**Demand satisfied (any method)**

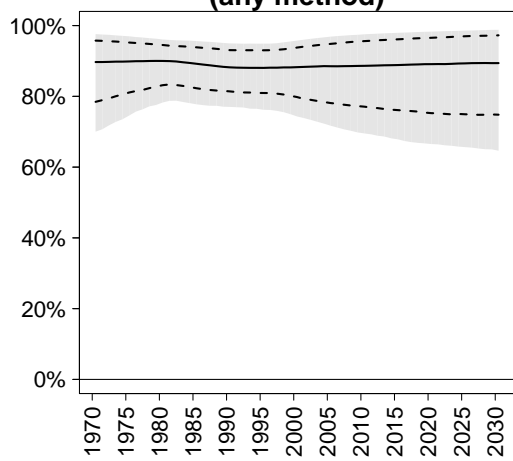

**Demand satisfied (modern methods)**

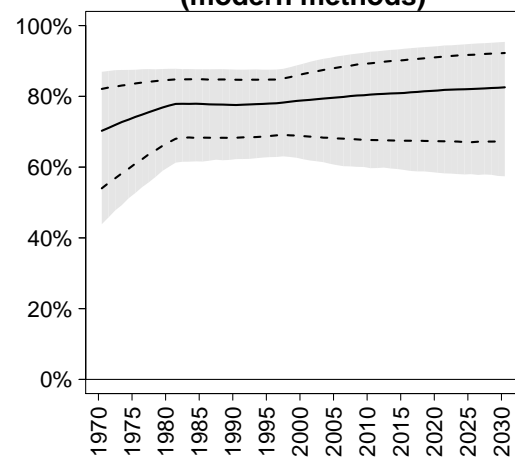



Switzerland --- All women

**CP (any)**

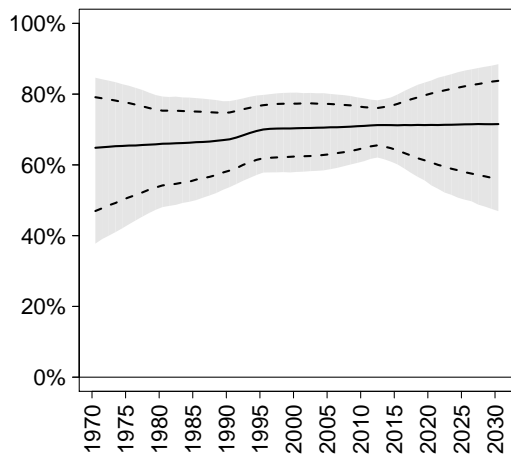

**CP (modern)**

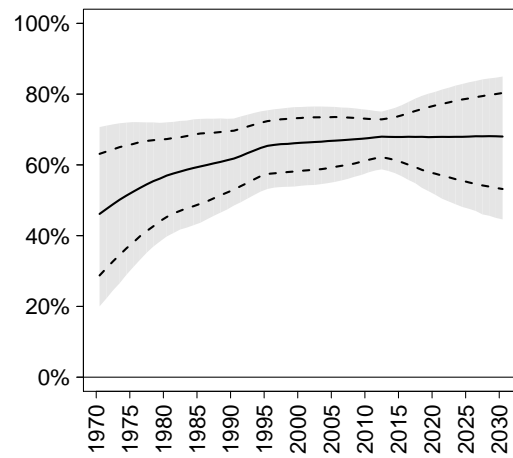

**CP (traditional)**

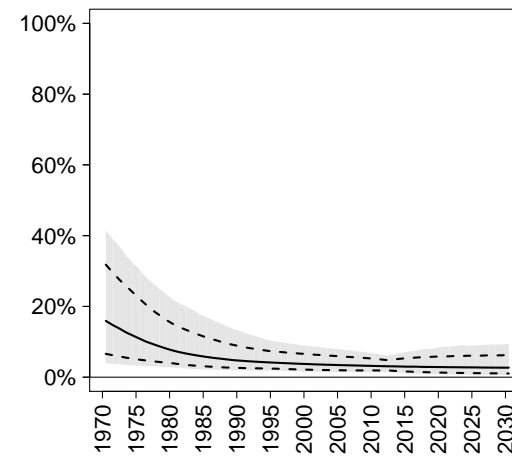

**Unmet need among all unmarried women**

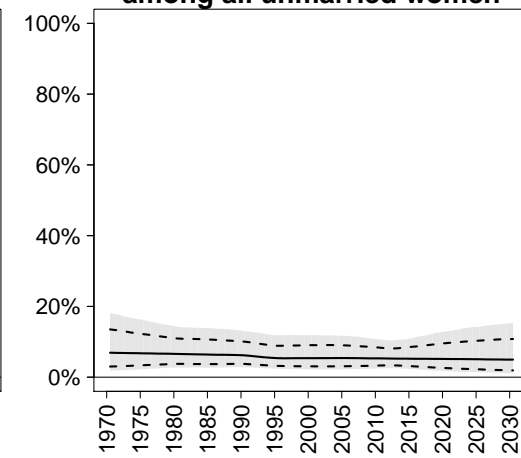

**Total demand**

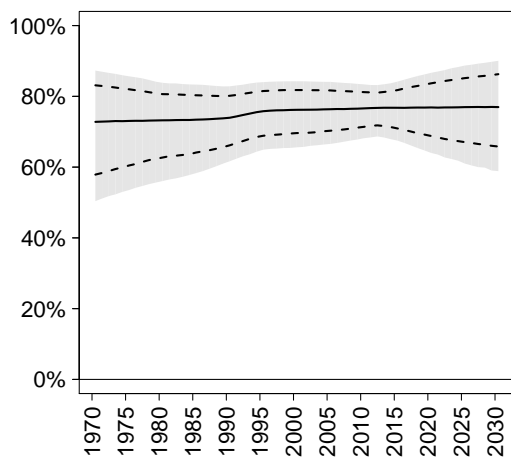

**Demand satisfied (any method)**

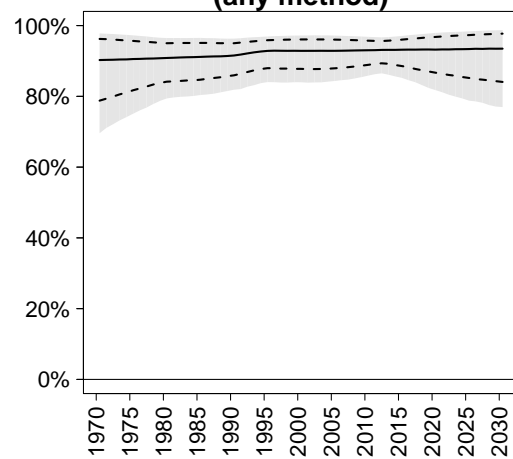

**Demand satisfied (modern methods)**

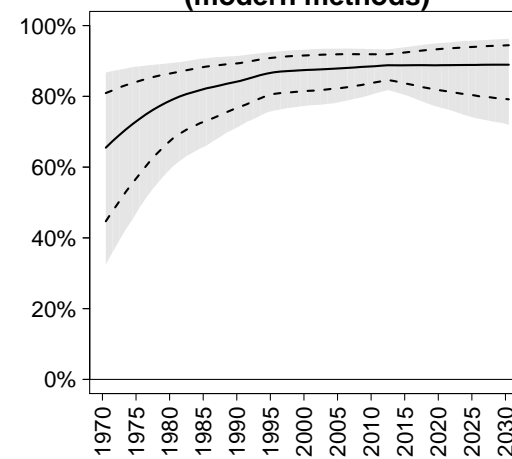

Syrian Arab Republic --- All women

**CP (any)**

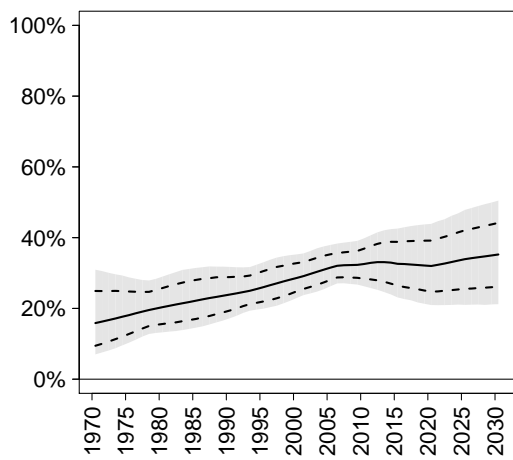

**CP (modern)**

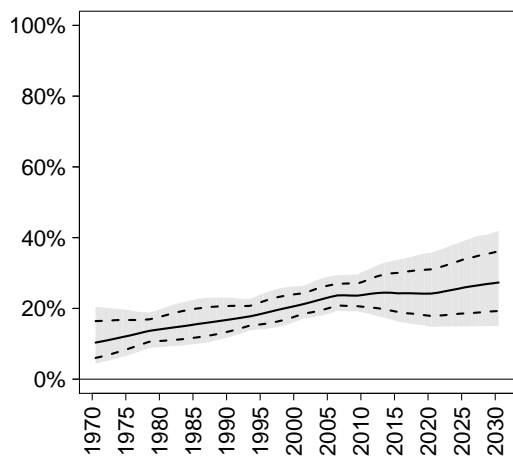

**CP (traditional)**

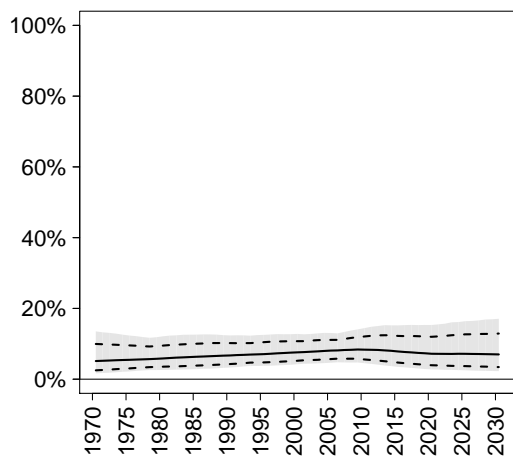

**Unmet need among all unmarried women**

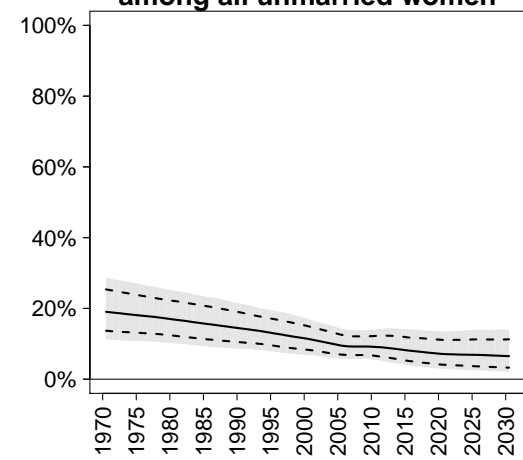

**Total demand**

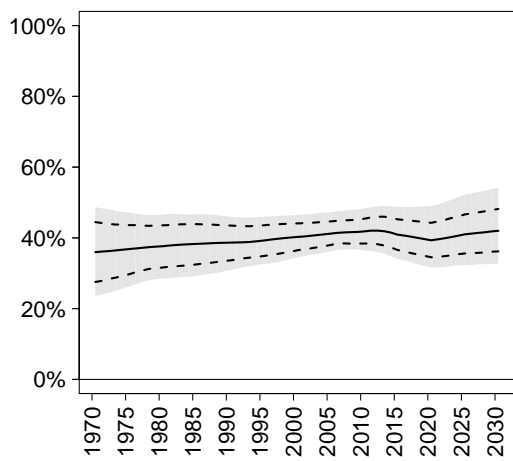

Tajikistan --- All women

**CP (any)**

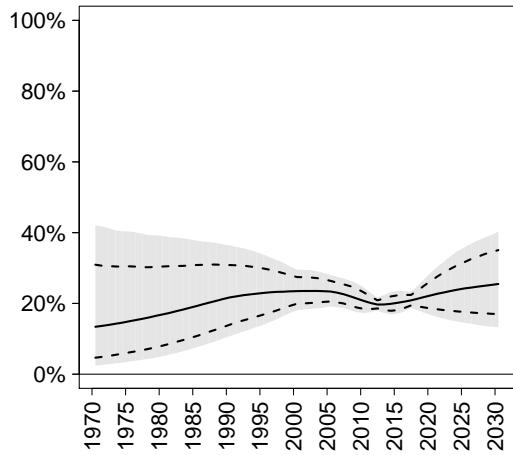

**CP (modern)**

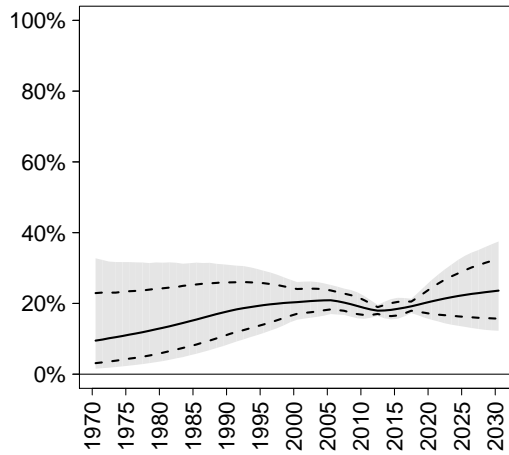

**CP (traditional)**

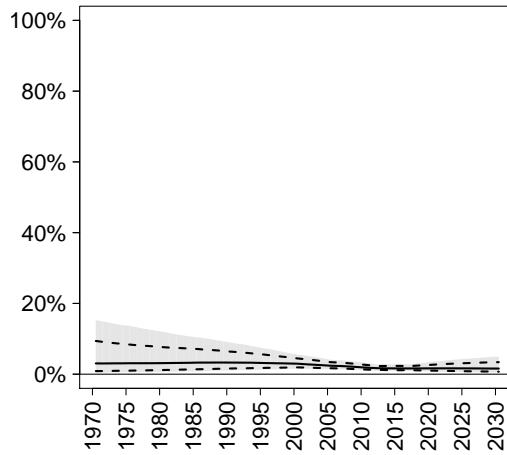

**Unmet need among all unmarried women**

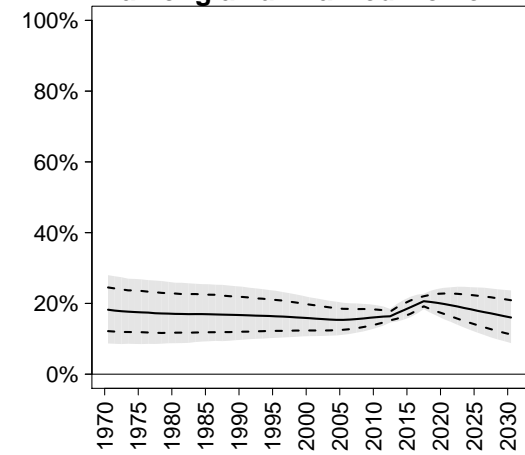

**Total demand**

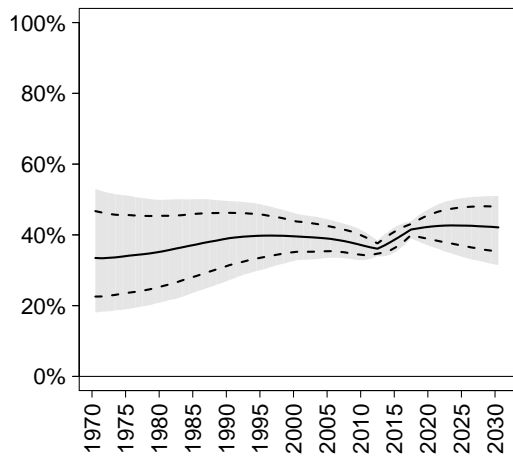

**Demand satisfied (any method)**

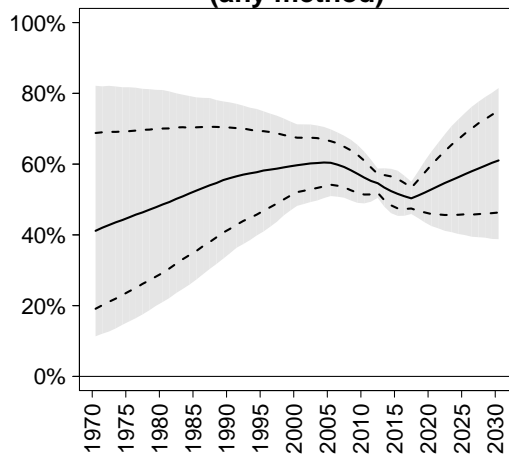

**Demand satisfied (modern methods)**

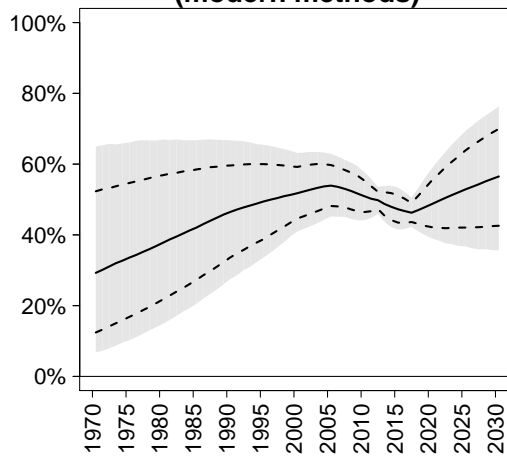

Thailand --- All women

**CP (any)**

**CP (modern)**

**CP (traditional)**

**Unmet need  
among all unmarried women**

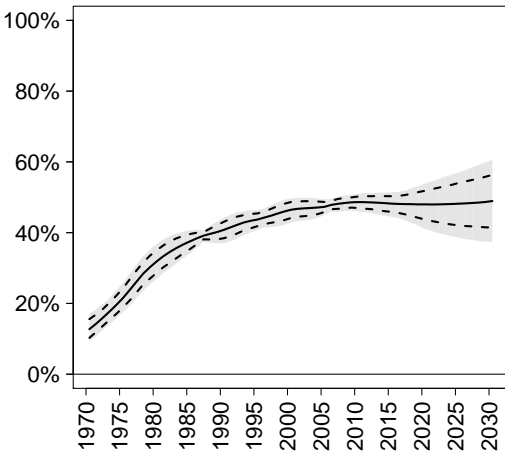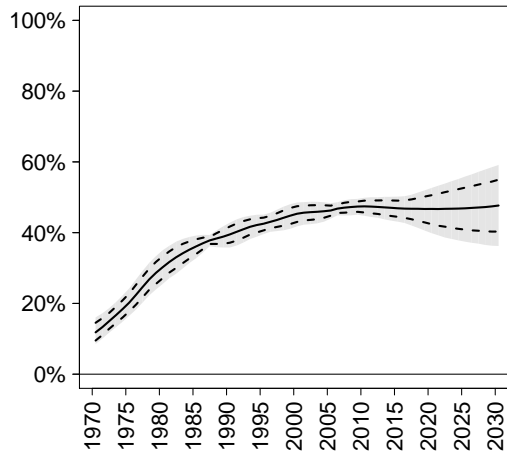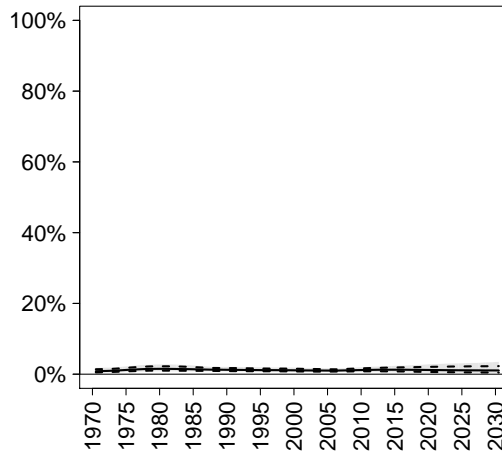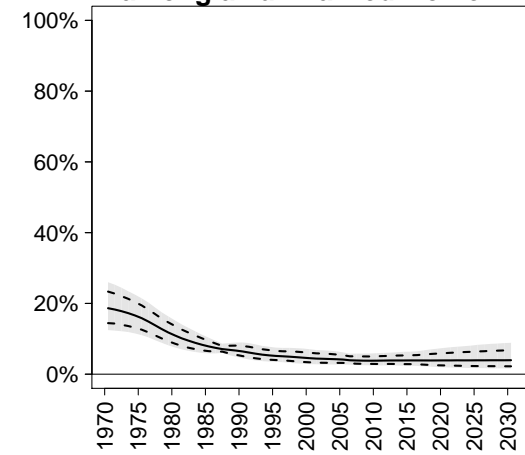

**Total demand**

**Demand satisfied  
(any method)**

**Demand satisfied  
(modern methods)**

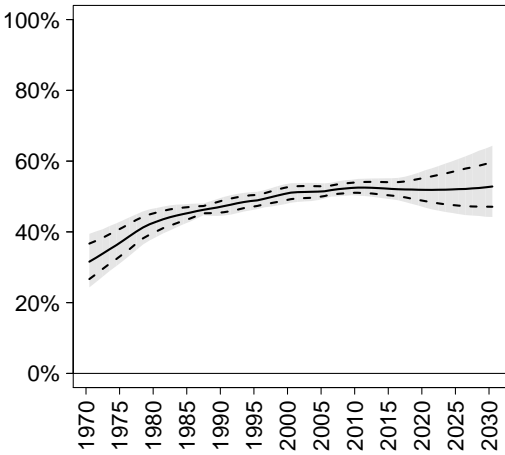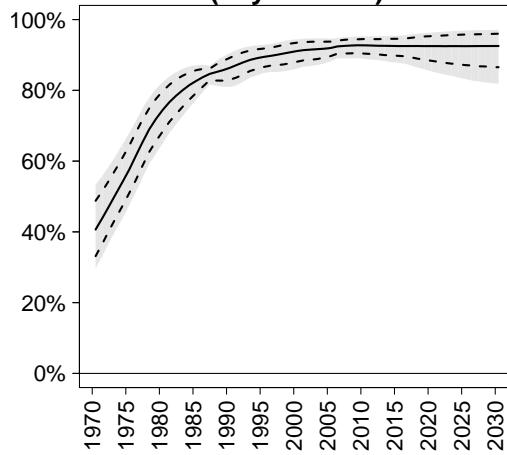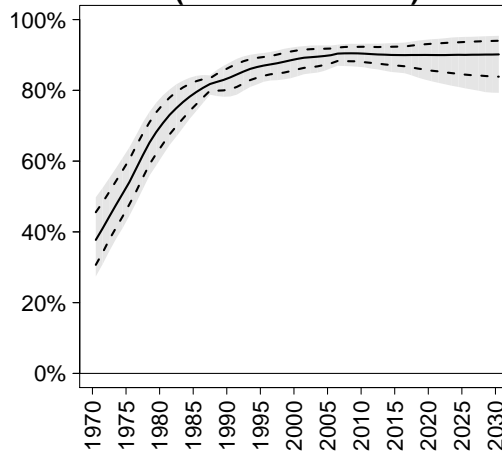

The former Yugoslav Republic of Macedonia --- All women

**CP (any)**

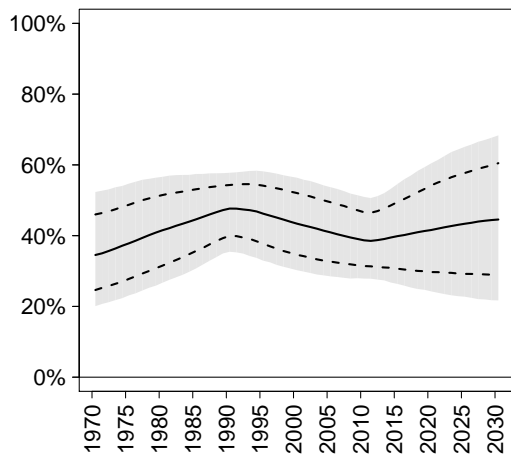

**CP (modern)**

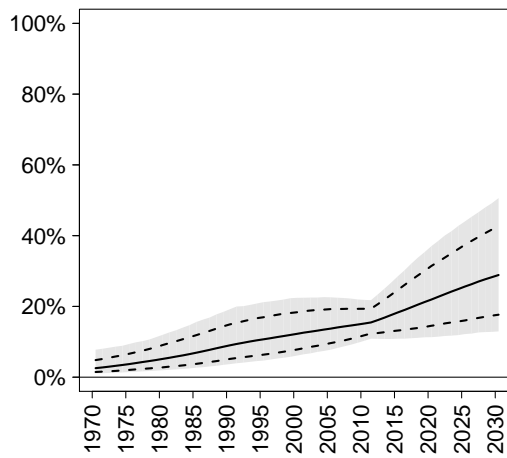

**CP (traditional)**

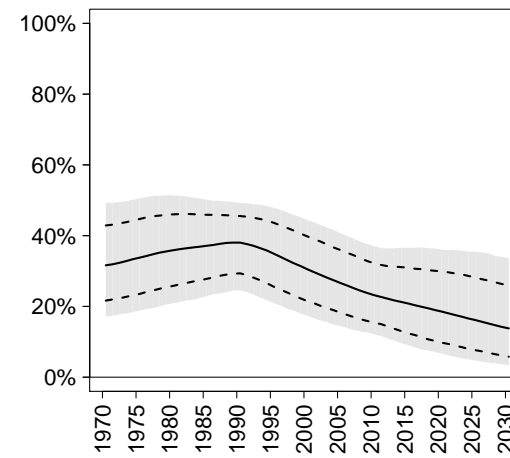

**Unmet need among all unmarried women**

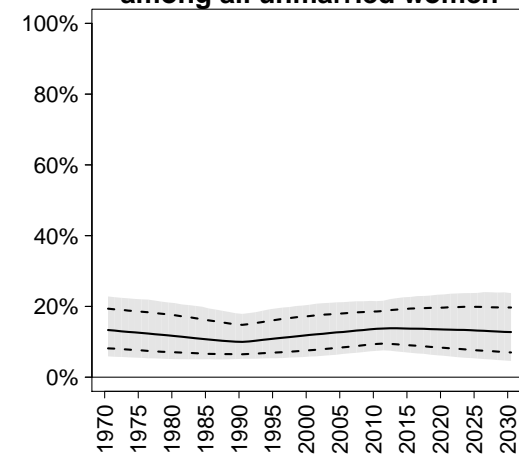

**Total demand**

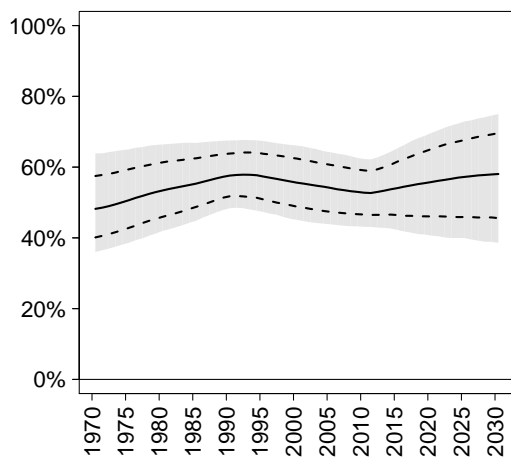

**Demand satisfied (any method)**

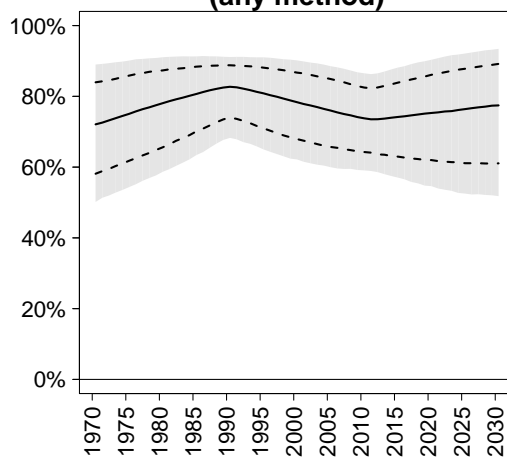

**Demand satisfied (modern methods)**

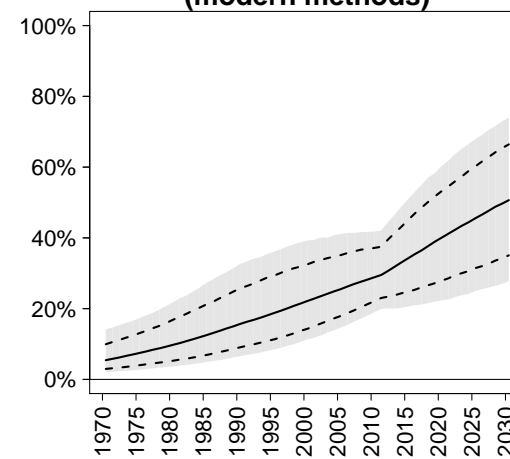

Timor-Leste --- All women

**CP (any)**

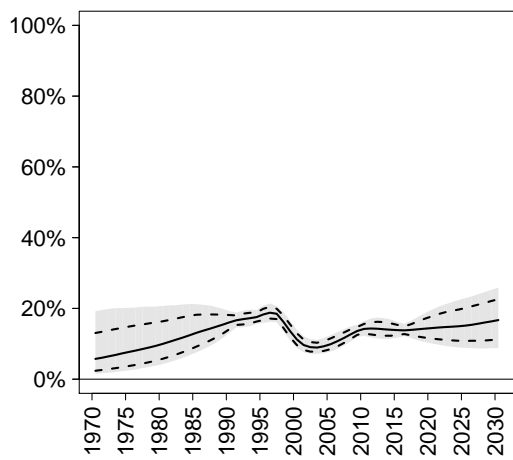

**CP (modern)**

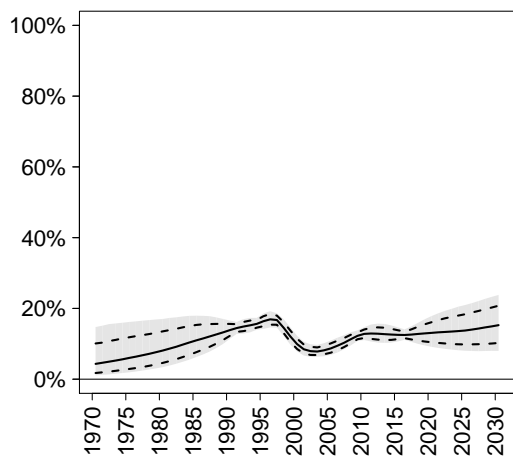

**CP (traditional)**

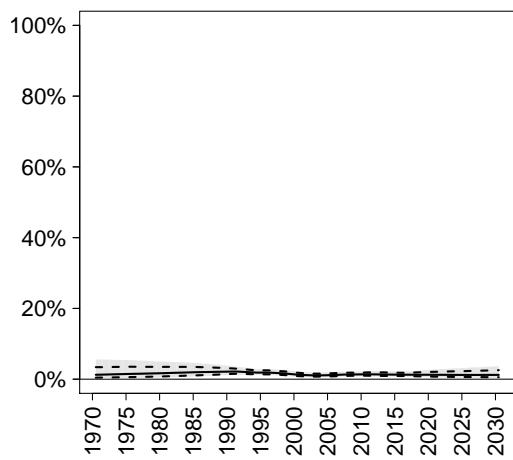

**Unmet need among all unmarried women**

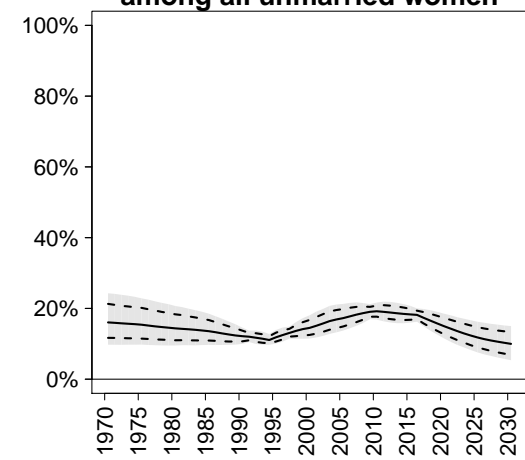

**Total demand**

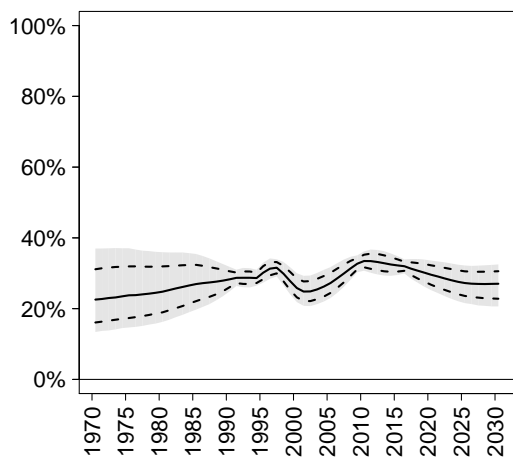

**Demand satisfied (any method)**

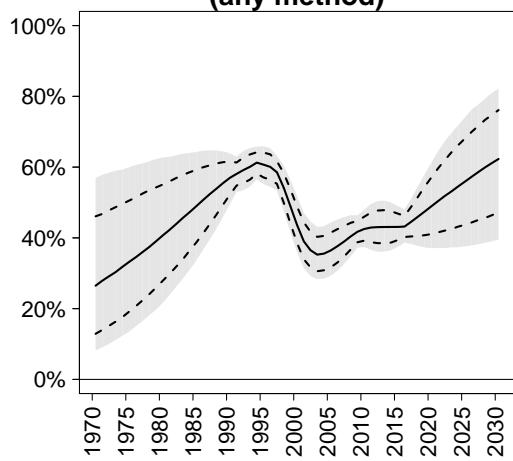

**Demand satisfied (modern methods)**

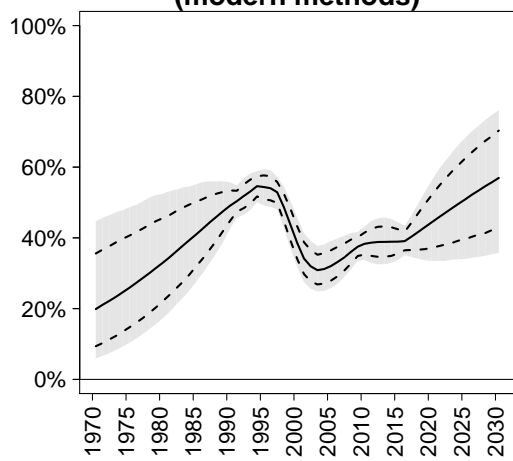

Togo --- All women

**CP (any)**

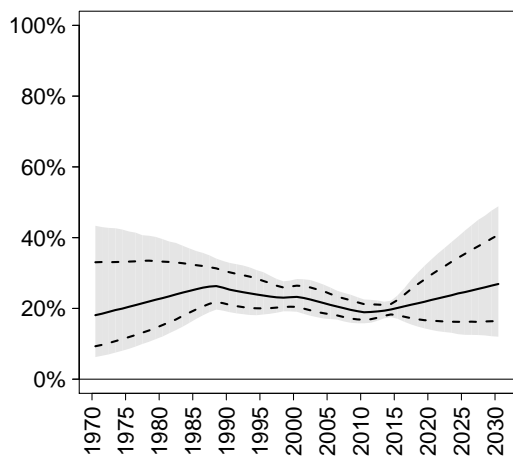

**CP (modern)**

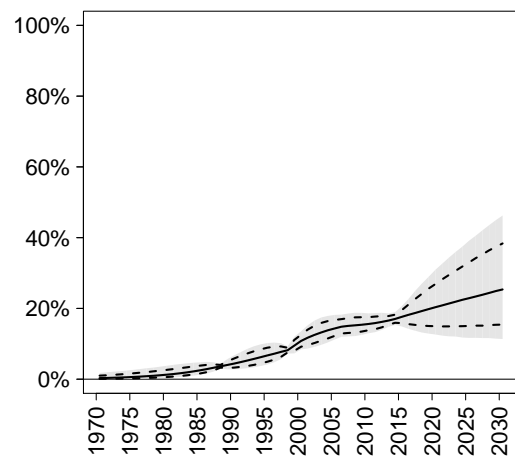

**CP (traditional)**

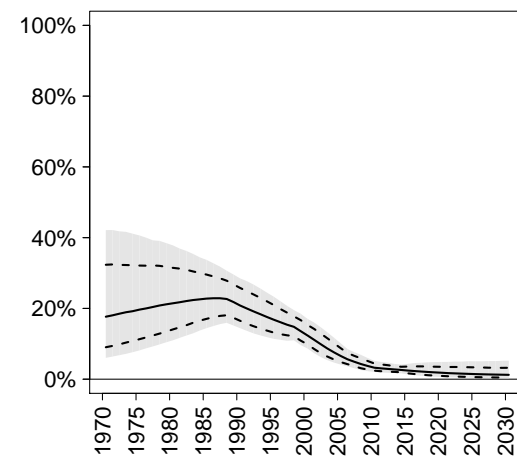

**Unmet need among all unmarried women**

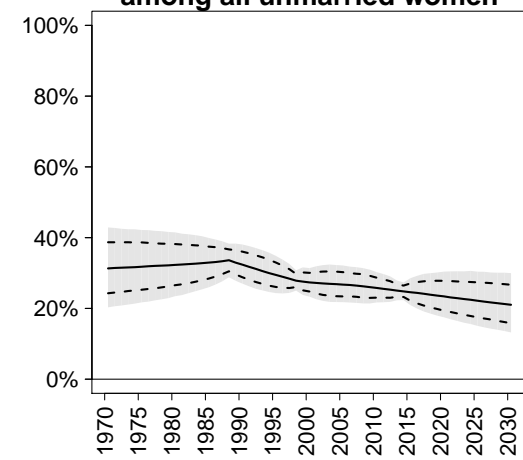

**Total demand**

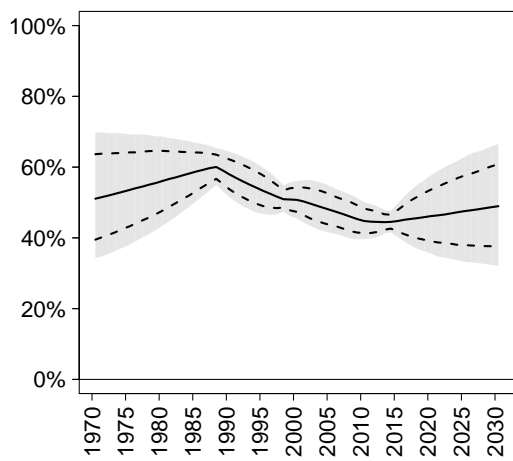

Tonga --- All women

**CP (any)**

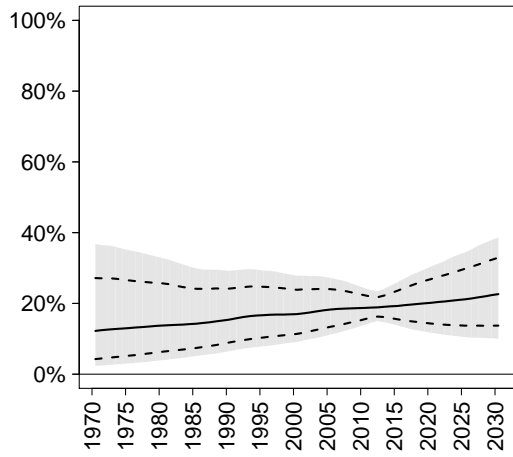

**CP (modern)**

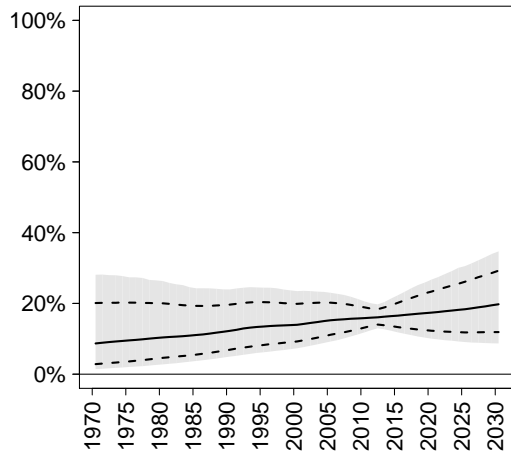

**CP (traditional)**

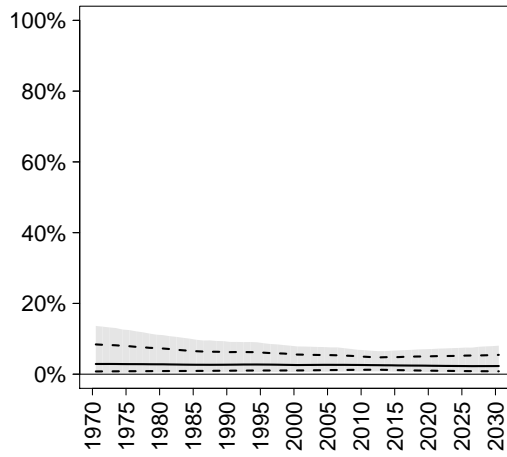

**Unmet need among all unmarried women**

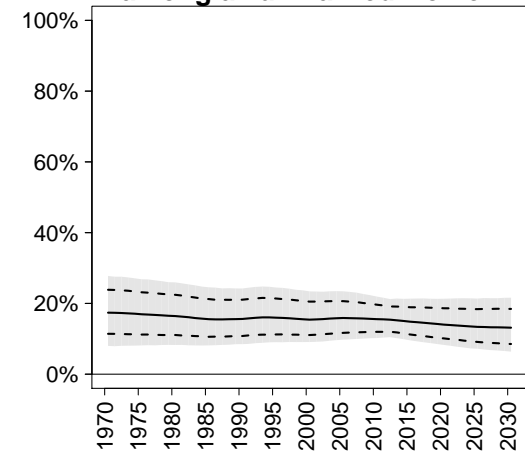

**Total demand**

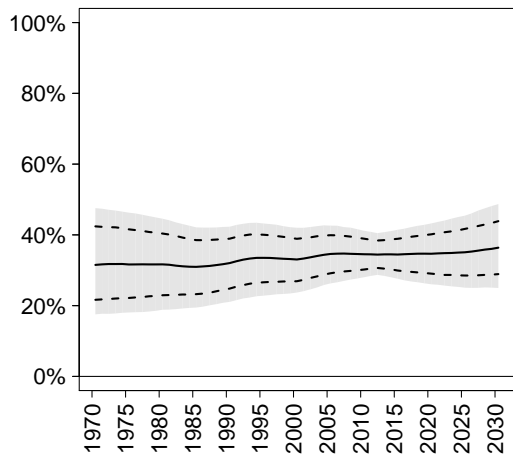

**Demand satisfied (any method)**

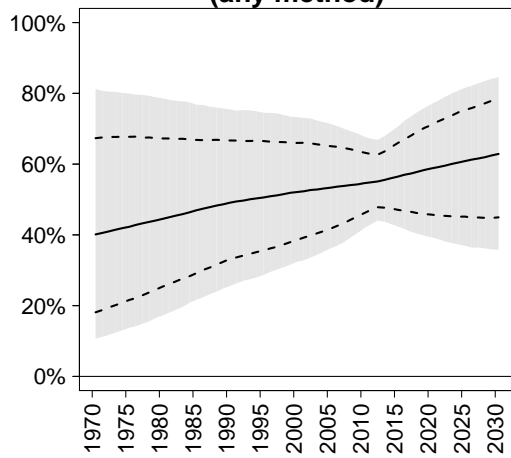

**Demand satisfied (modern methods)**

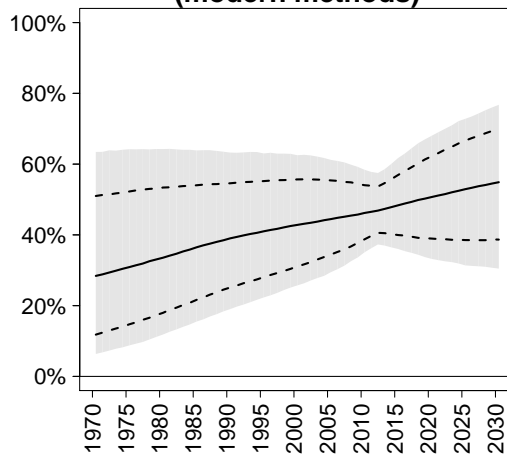



Trinidad and Tobago --- All women

**CP (any)**

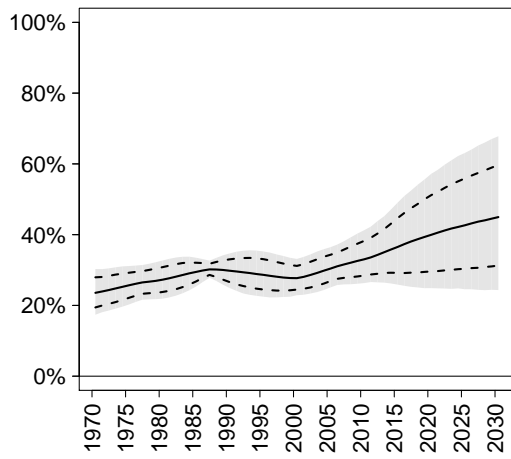

**CP (modern)**

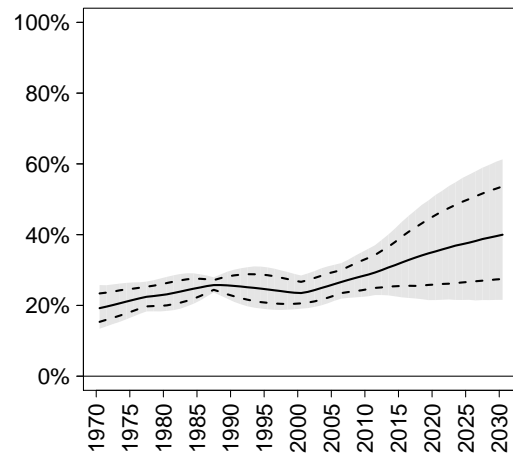

**CP (traditional)**

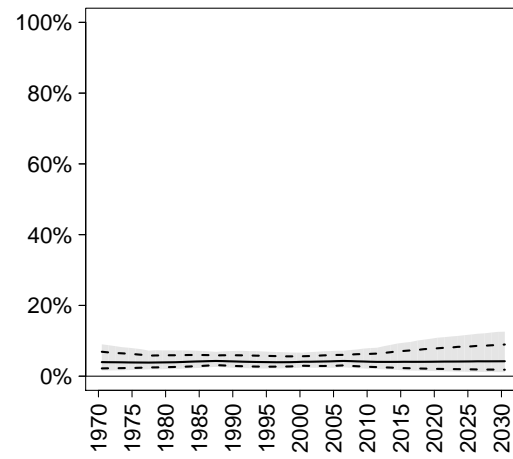

**Unmet need among all unmarried women**

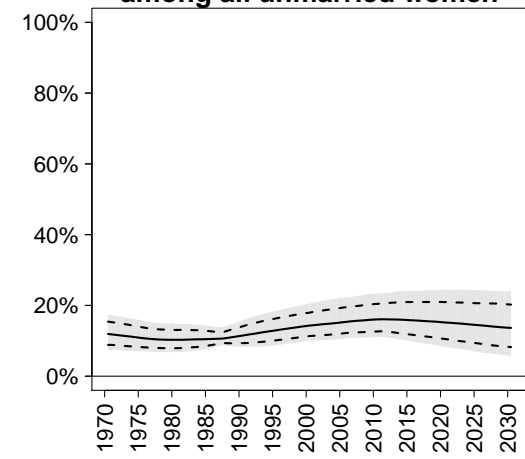

**Total demand**

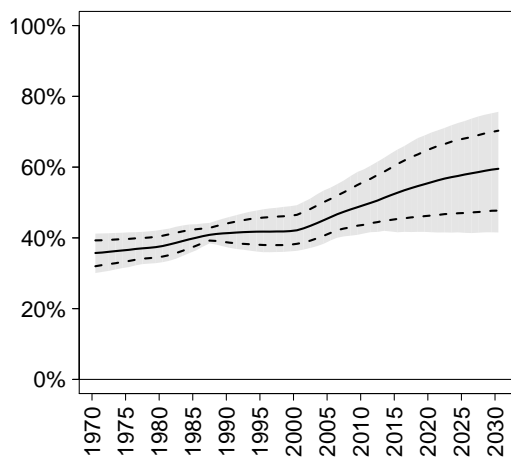

**Demand satisfied (any method)**

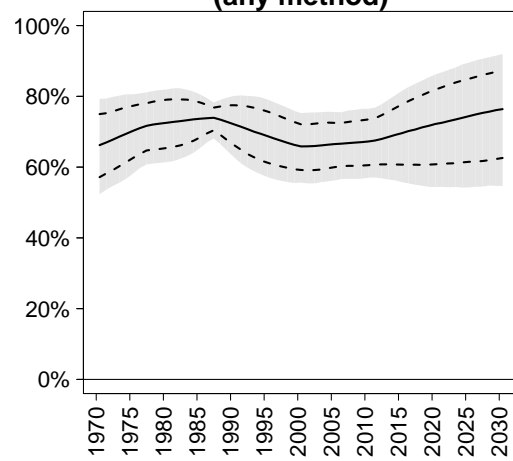

**Demand satisfied (modern methods)**

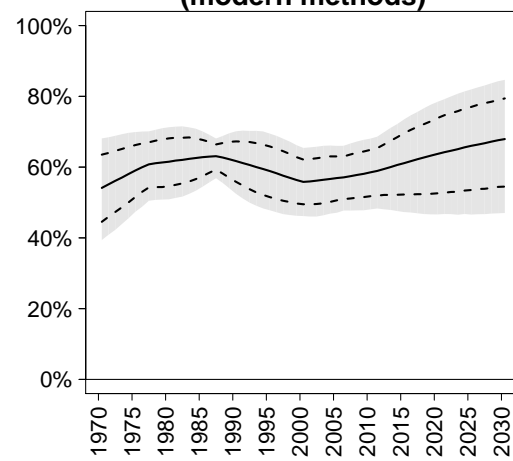

Tunisia --- All women

**CP (any)**

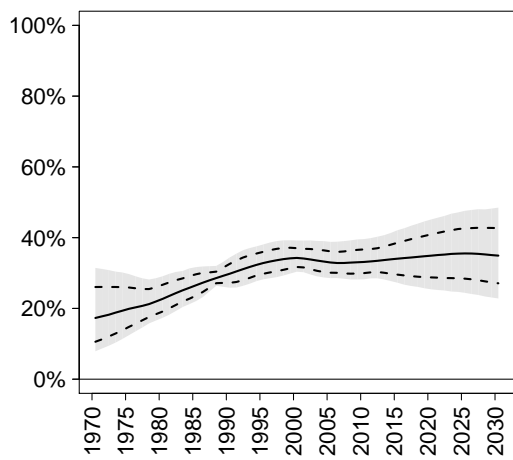

**CP (modern)**

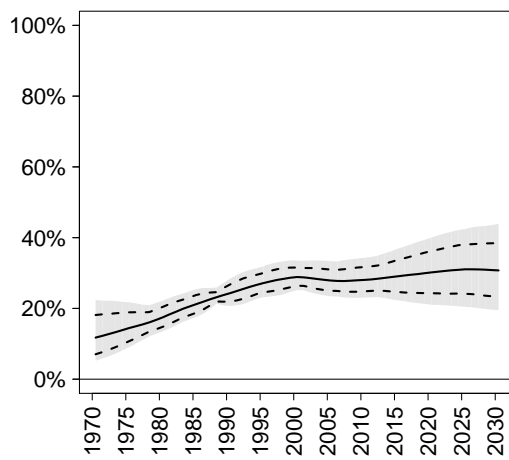

**CP (traditional)**

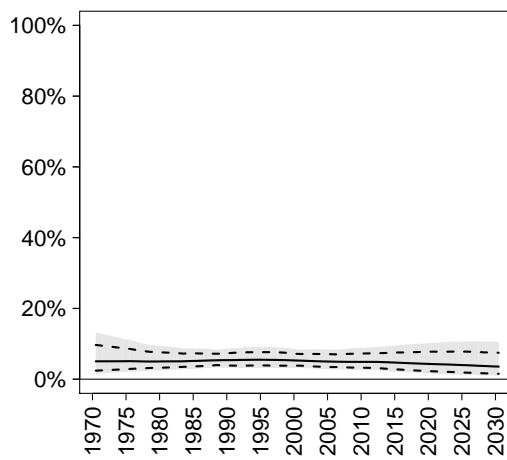

**Unmet need among all unmarried women**

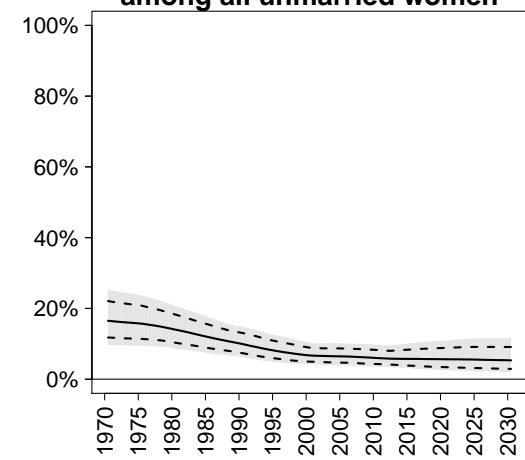

**Total demand**

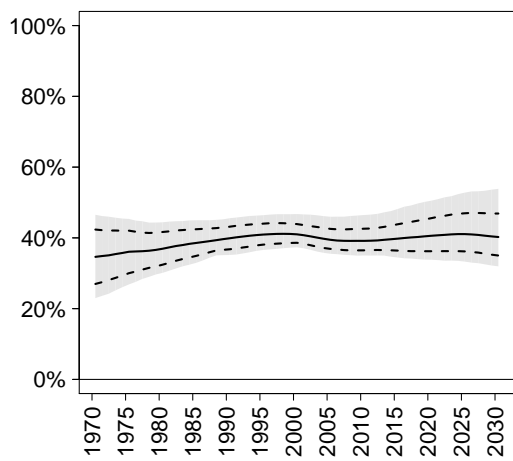

**Demand satisfied (any method)**

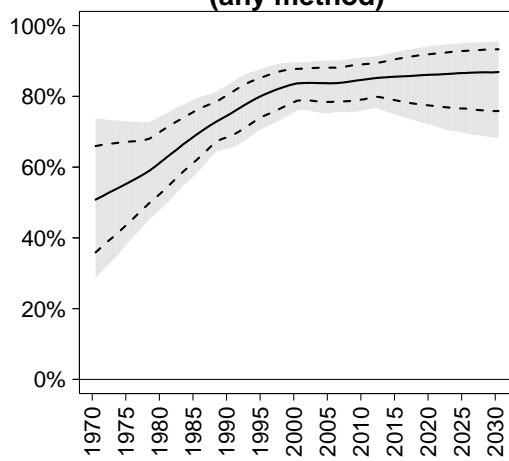

**Demand satisfied (modern methods)**

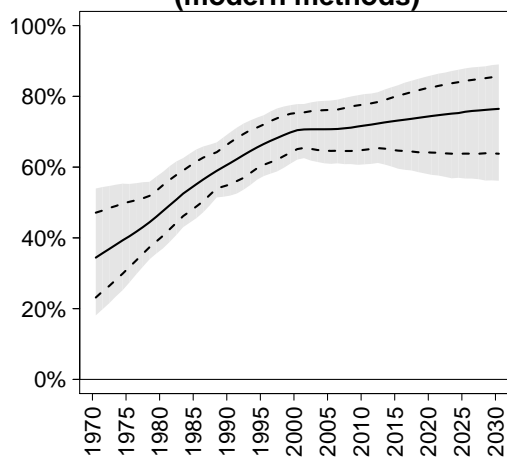

Turkey --- All women

**CP (any)**

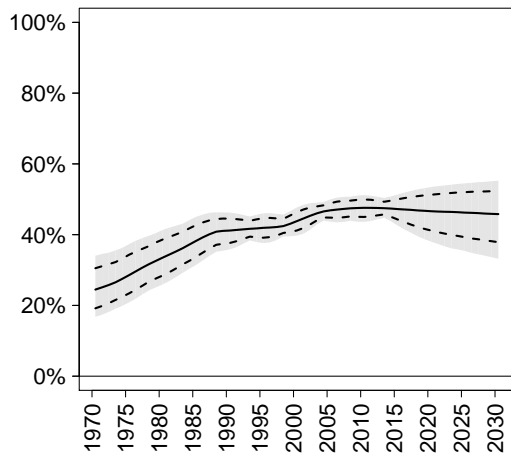

**CP (modern)**

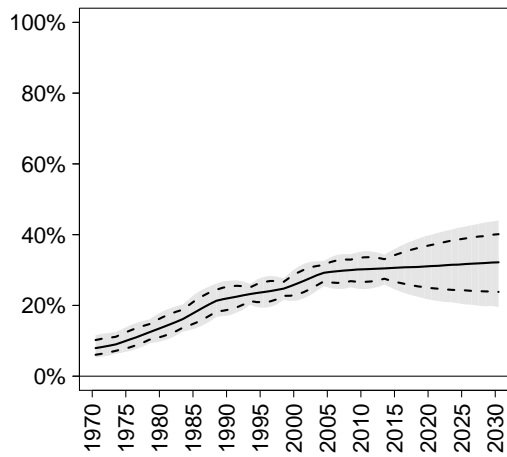

**CP (traditional)**

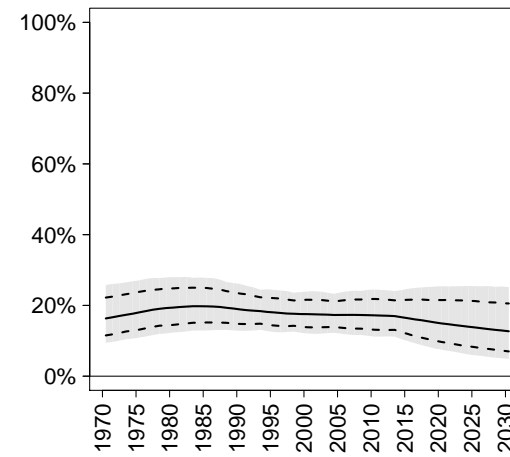

**Unmet need among all unmarried women**

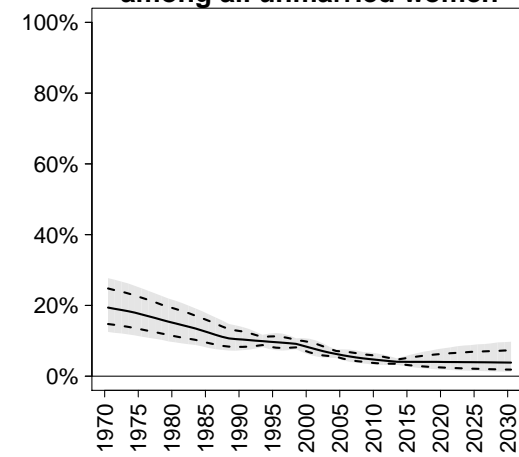

**Total demand**

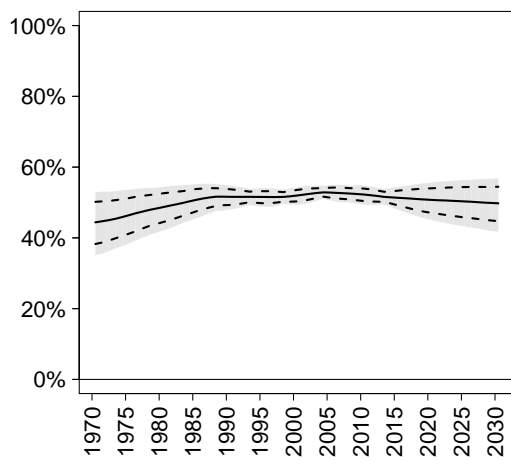

**Demand satisfied (any method)**

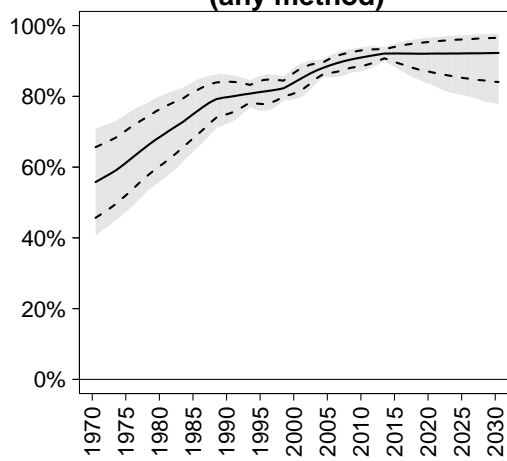

**Demand satisfied (modern methods)**

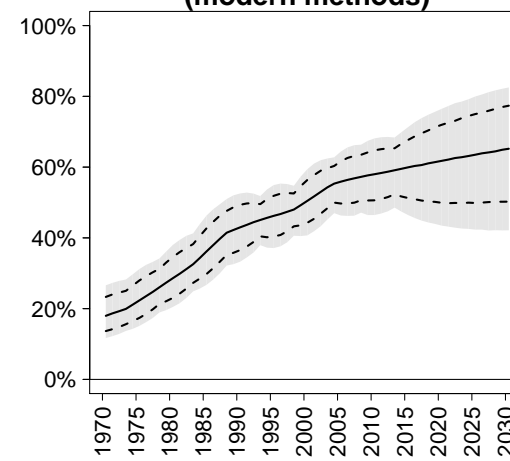

Turkmenistan --- All women

**CP (any)**

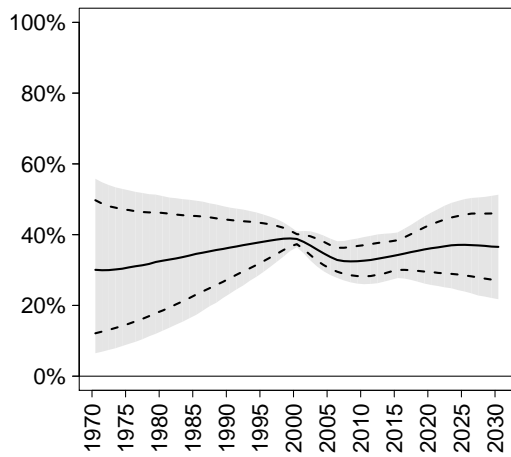

**CP (modern)**

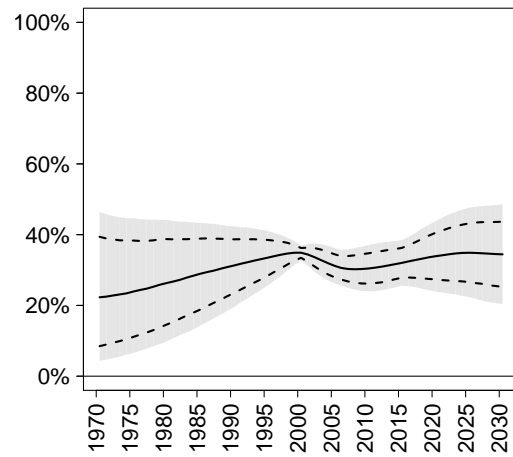

**CP (traditional)**

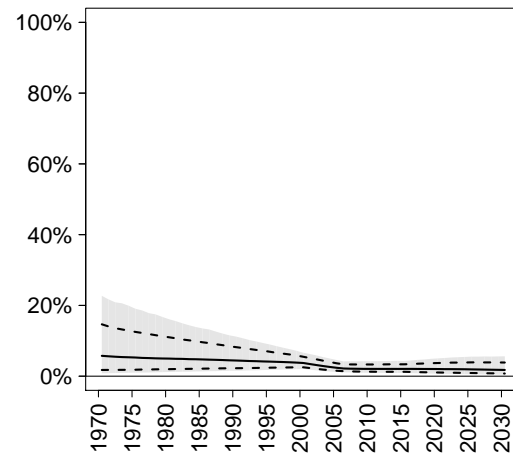

**Unmet need among all unmarried women**

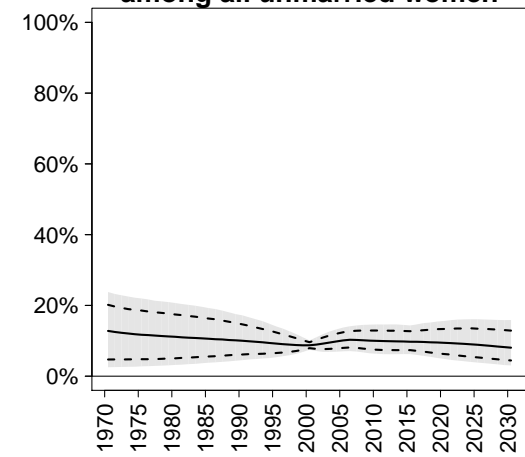

**Total demand**

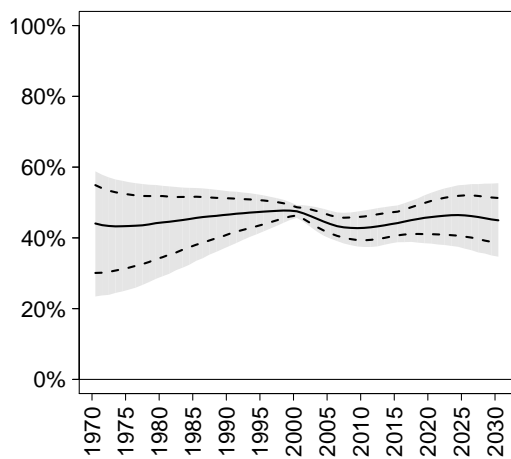

**Demand satisfied (any method)**

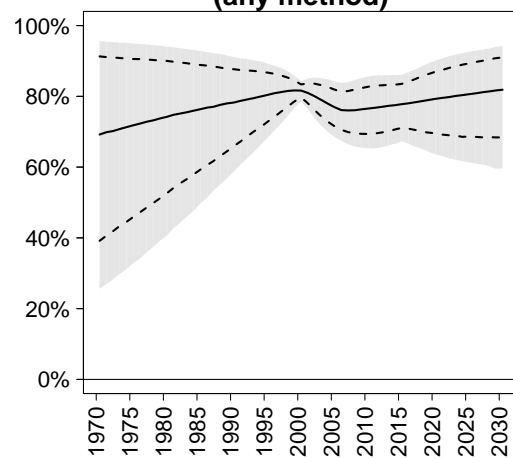

**Demand satisfied (modern methods)**

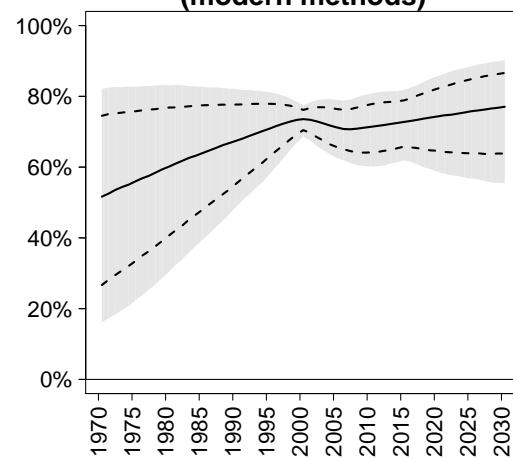

Uganda --- All women

**CP (any)**

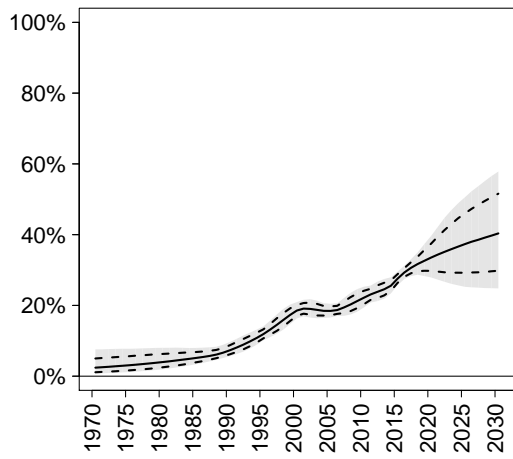

**CP (modern)**

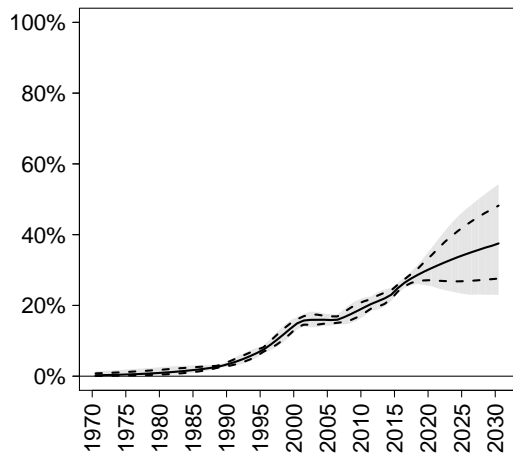

**CP (traditional)**

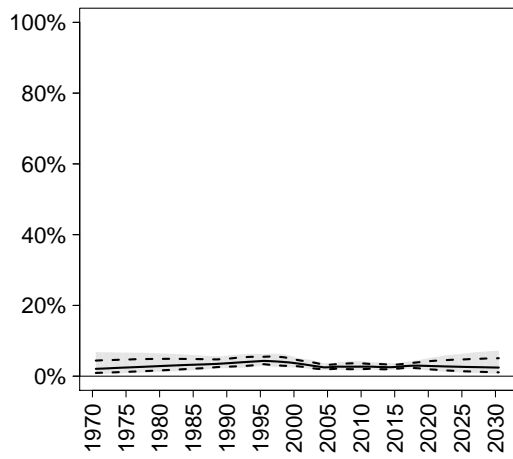

**Unmet need among all unmarried women**

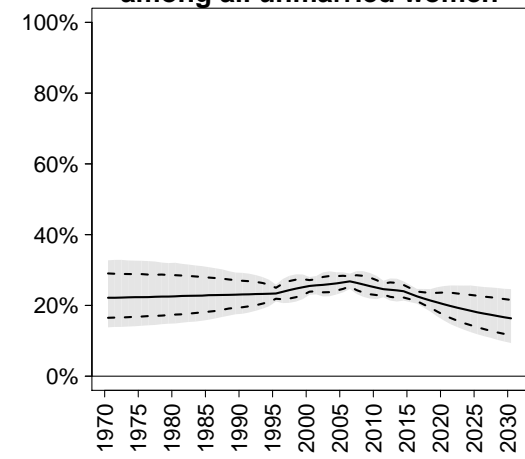

**Total demand**

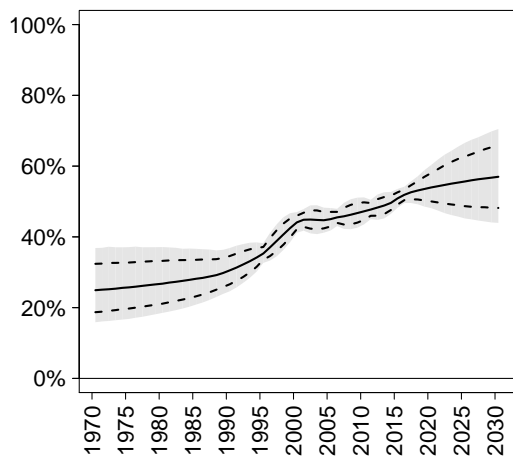

**Demand satisfied (any method)**

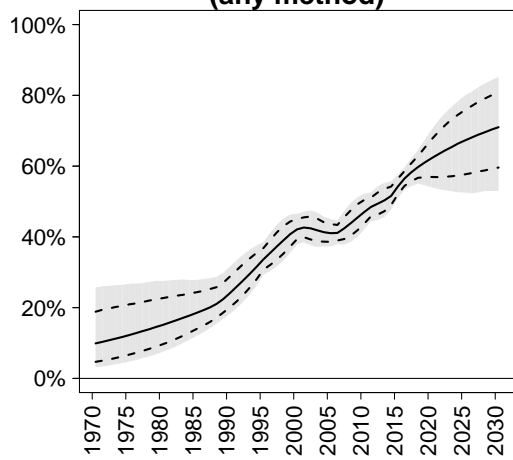

**Demand satisfied (modern methods)**

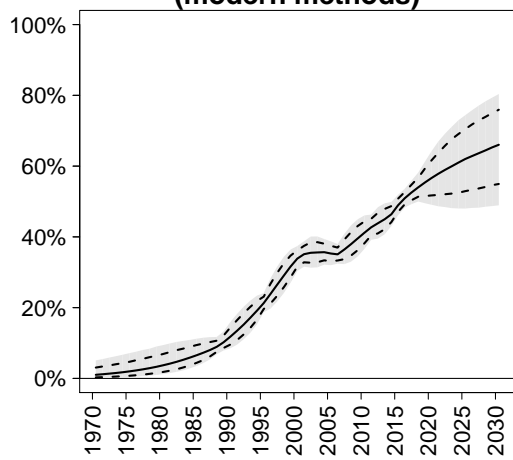

Ukraine --- All women

**CP (any)**

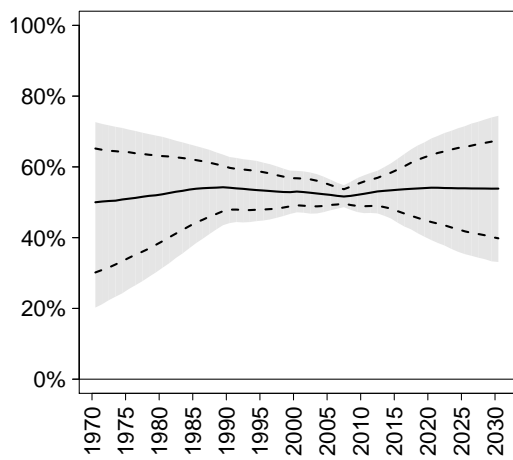

**CP (modern)**

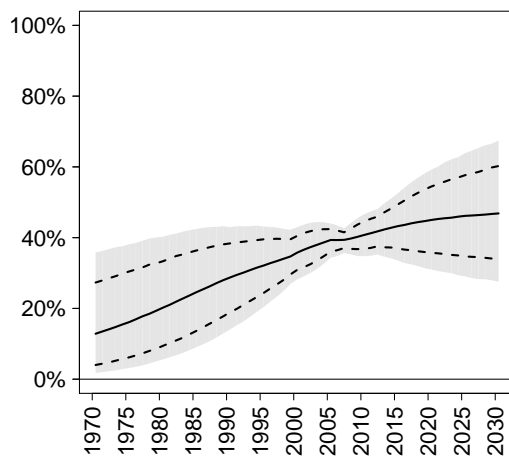

**CP (traditional)**

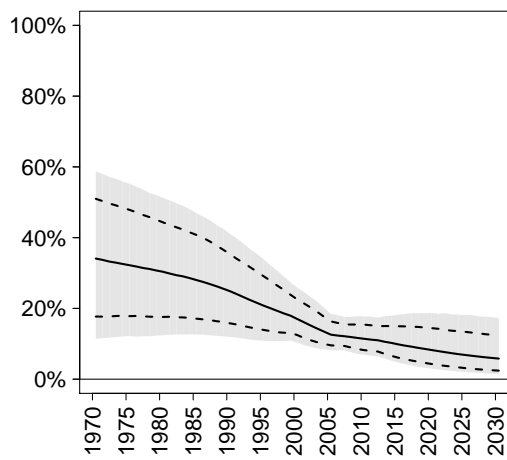

**Unmet need among all unmarried women**

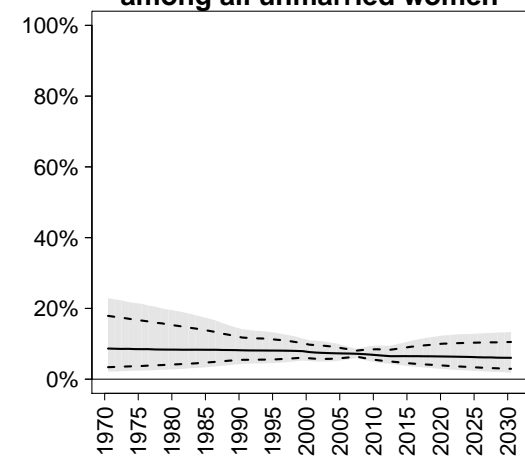

**Total demand**

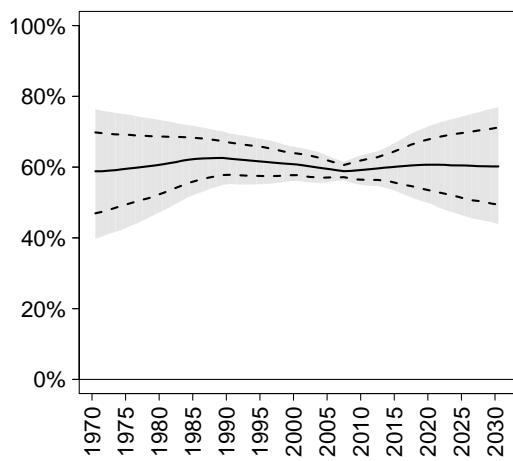

**Demand satisfied (any method)**

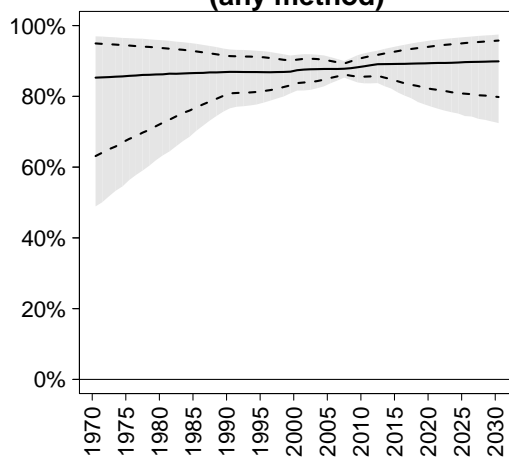

**Demand satisfied (modern methods)**

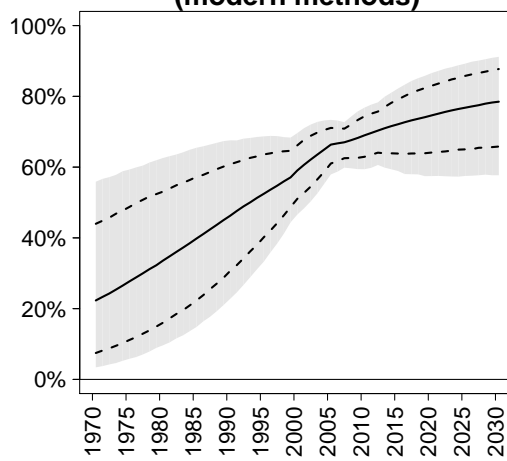

United Arab Emirates --- All women

**CP (any)**

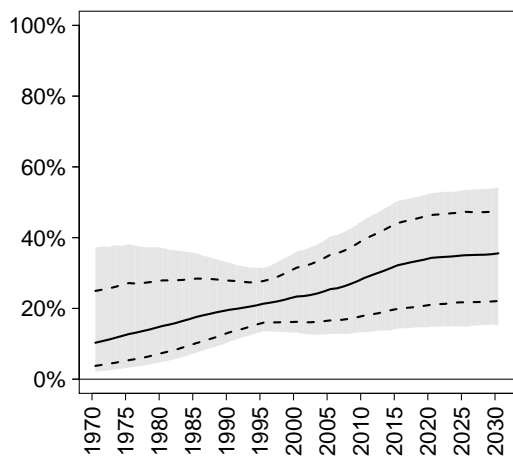

**CP (modern)**

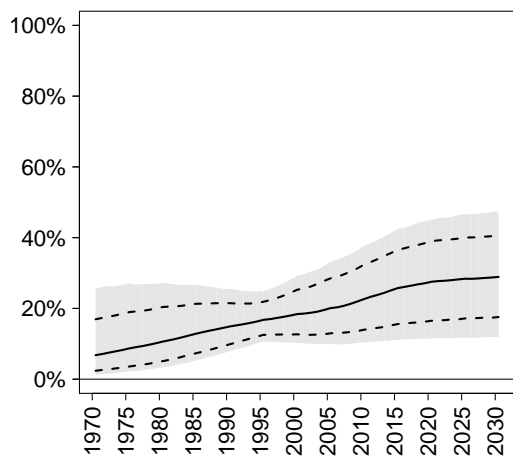

**CP (traditional)**

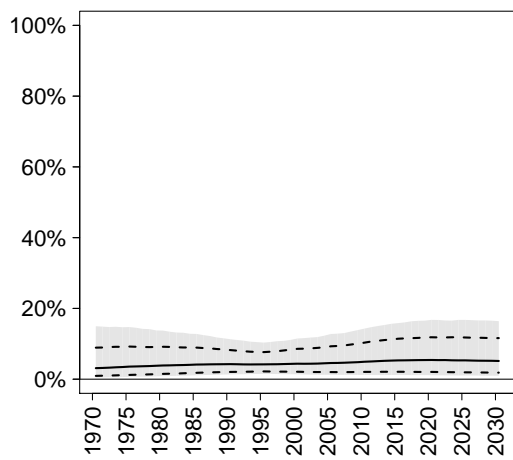

**Unmet need among all unmarried women**

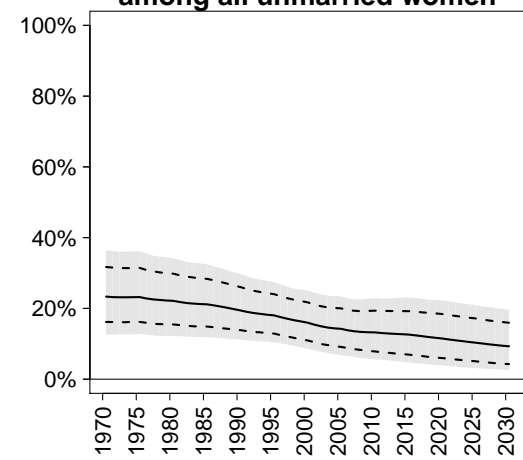

**Total demand**

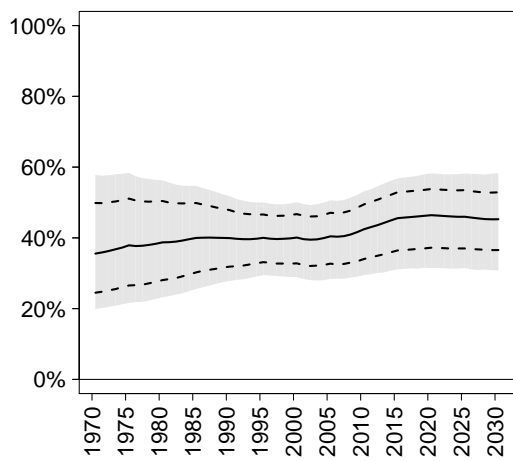

**Demand satisfied (any method)**

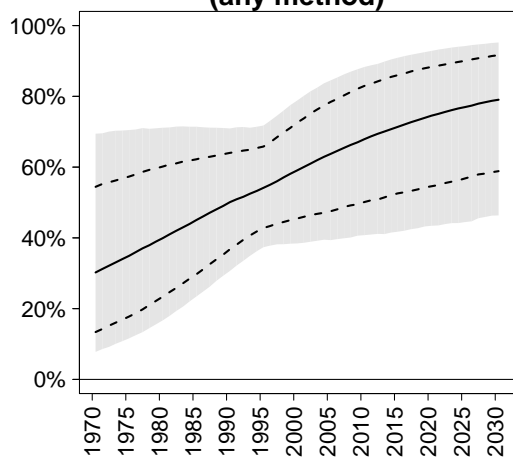

**Demand satisfied (modern methods)**

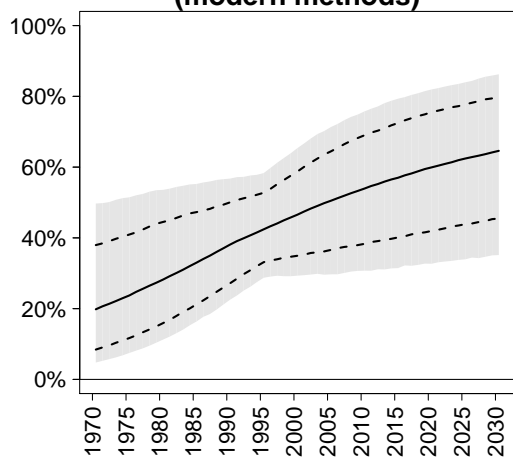

United Kingdom of Great Britain and Northern Ireland --- All women

**CP (any)**

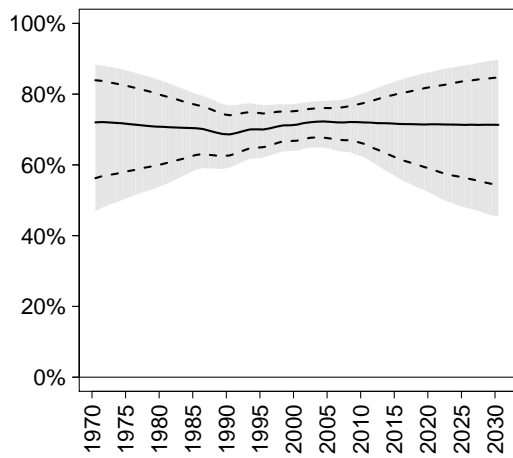

**CP (modern)**

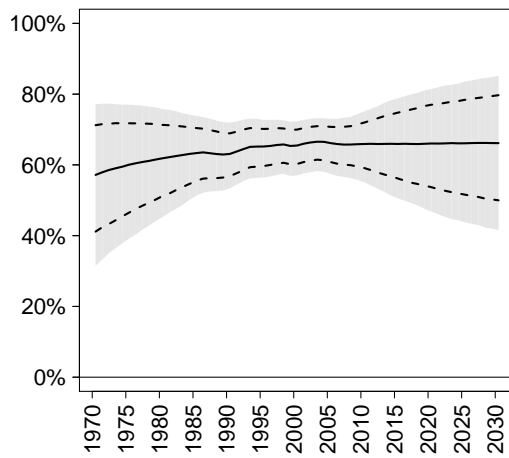

**CP (traditional)**

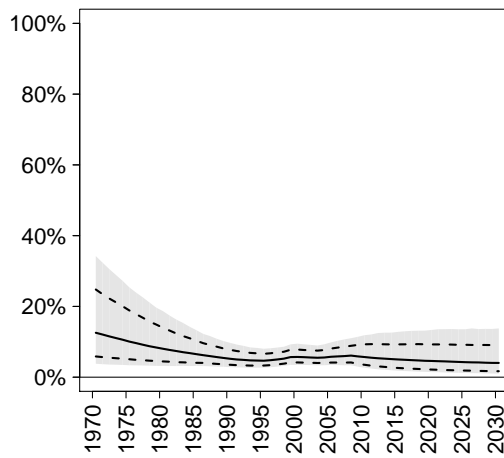

**Unmet need among all unmarried women**

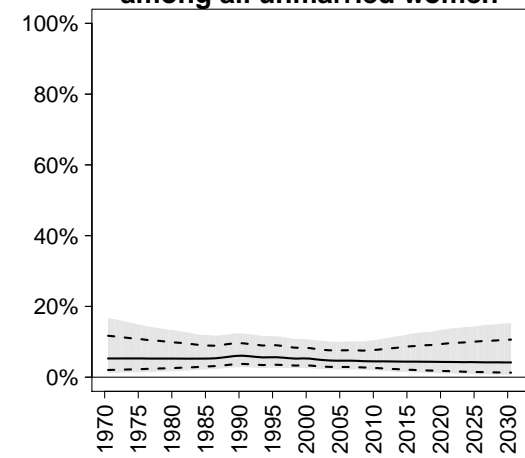

**Total demand**

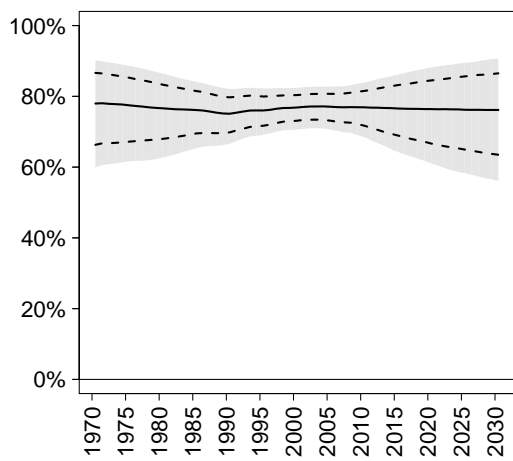

**Demand satisfied (any method)**

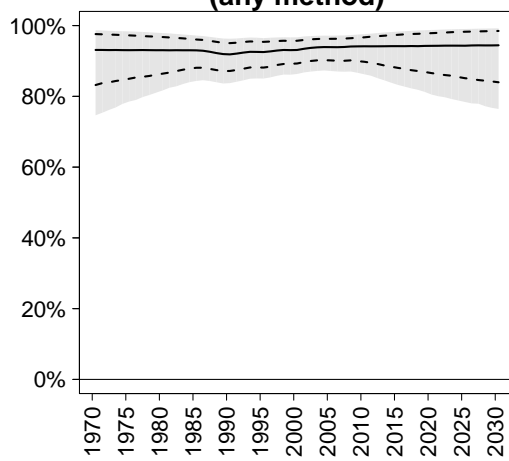

**Demand satisfied (modern methods)**

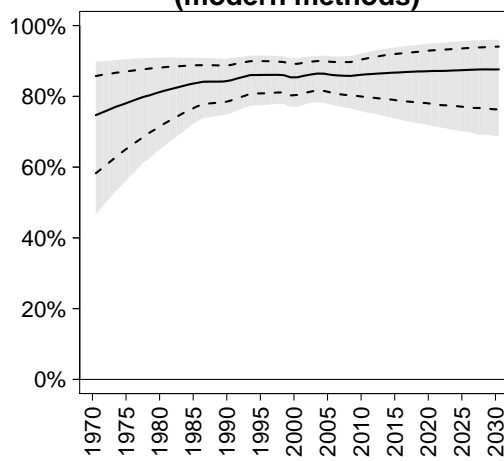



United Republic of Tanzania --- All women

**CP (any)**

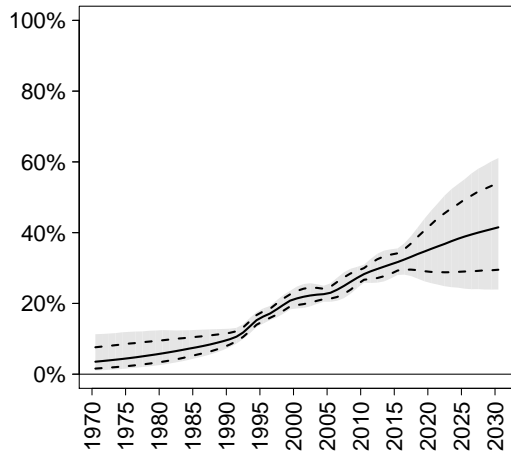

**CP (modern)**

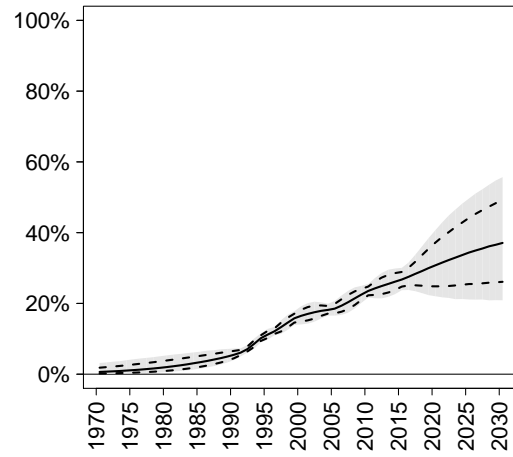

**CP (traditional)**

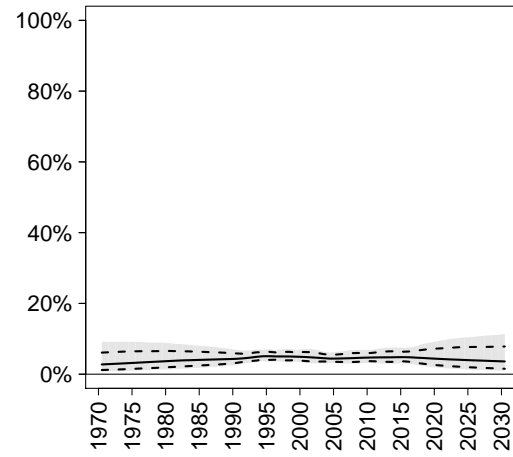

**Unmet need among all unmarried women**

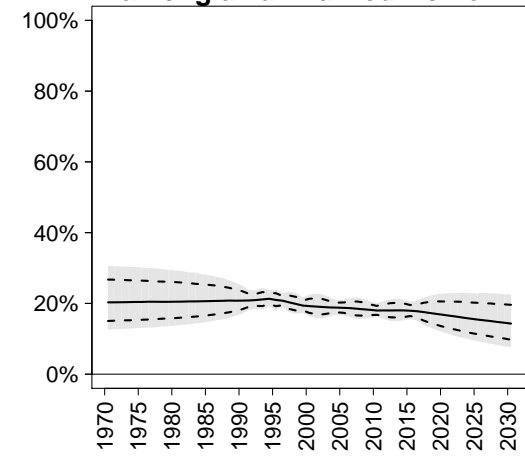

**Total demand**

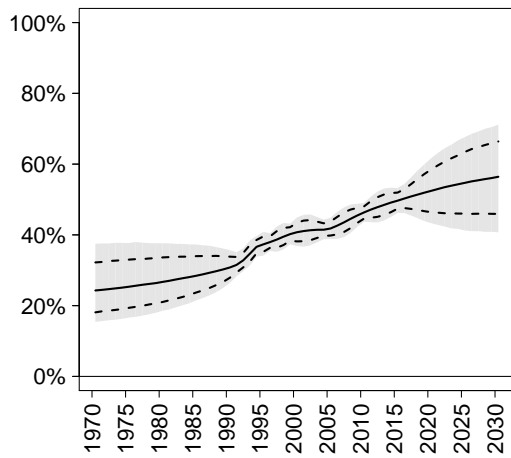

**Demand satisfied (any method)**

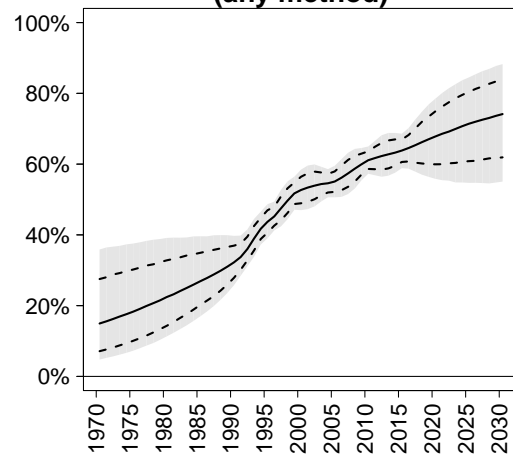

**Demand satisfied (modern methods)**

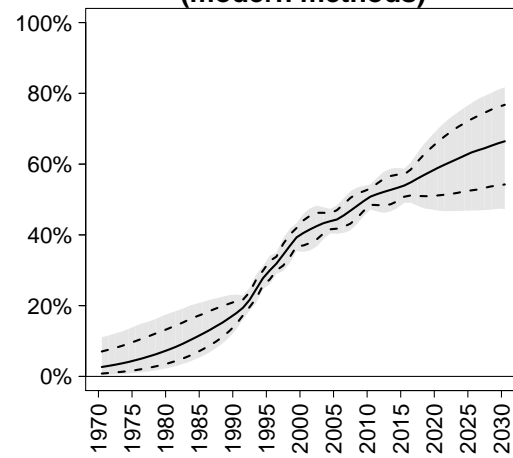

United States of America --- All women

**CP (any)**

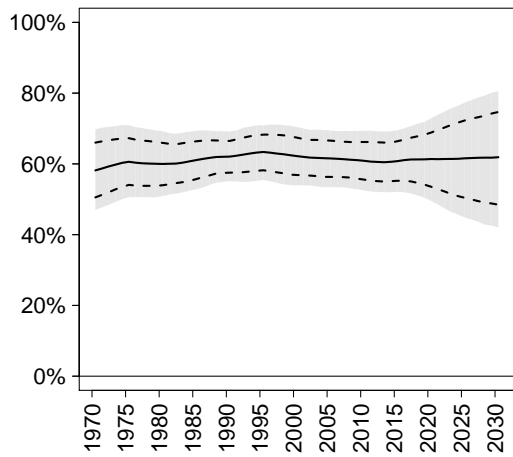

**CP (modern)**

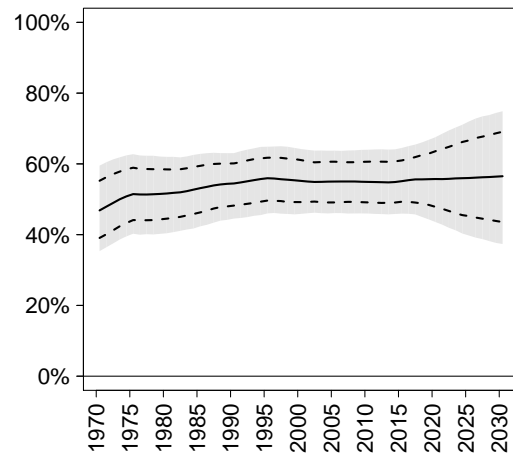

**CP (traditional)**

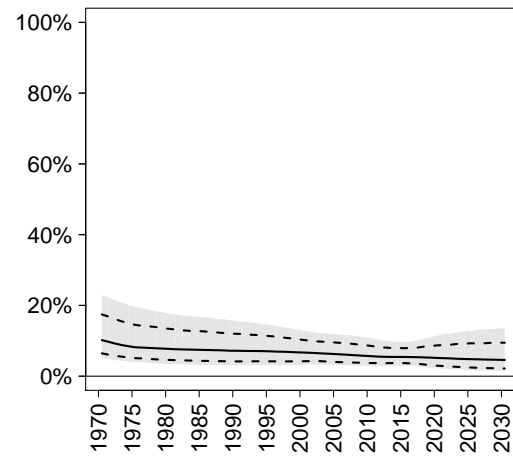

**Unmet need among all unmarried women**

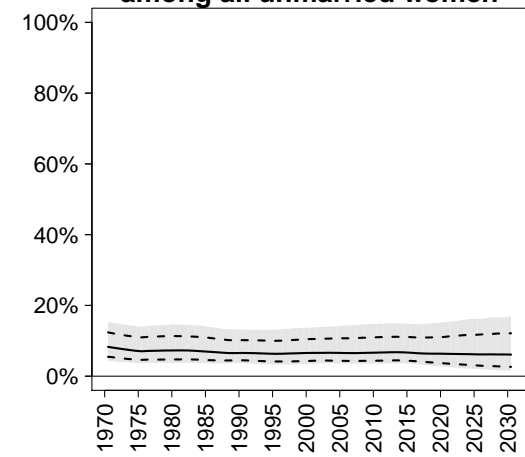

**Total demand**

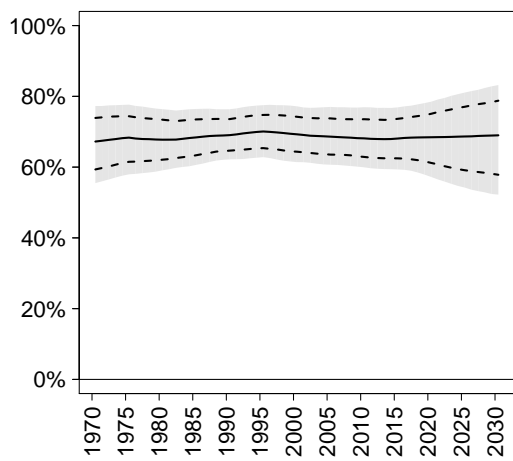

United States Virgin Islands --- All women

**CP (any)**

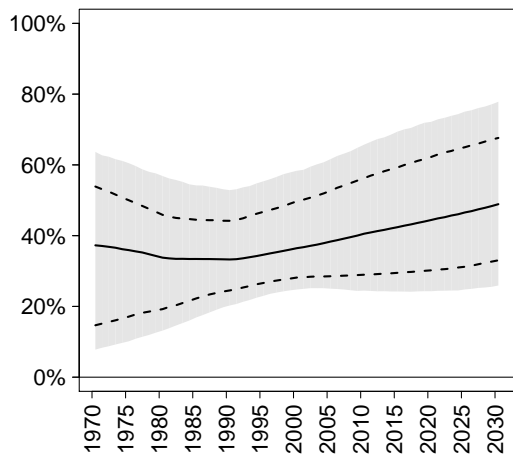

**CP (modern)**

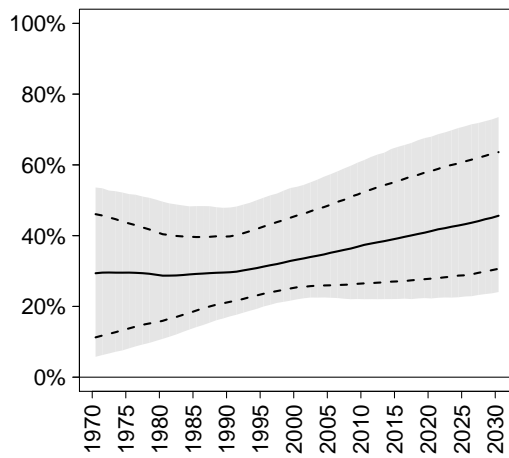

**CP (traditional)**

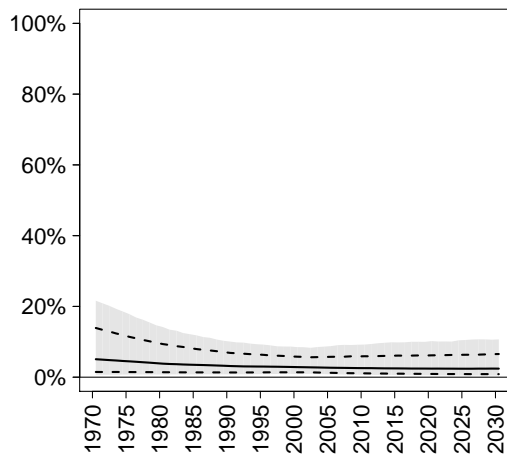

**Unmet need among all unmarried women**

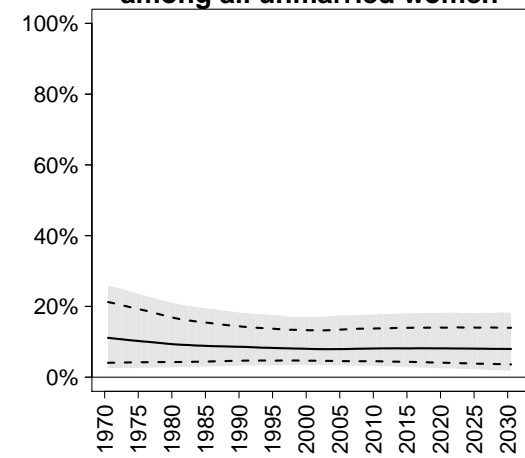

**Total demand**

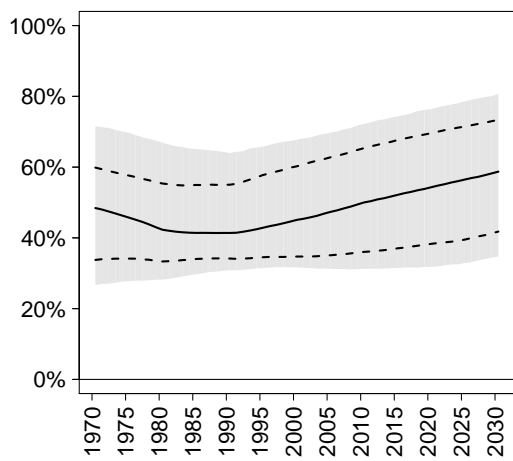

Uruguay --- All women

**CP (any)**

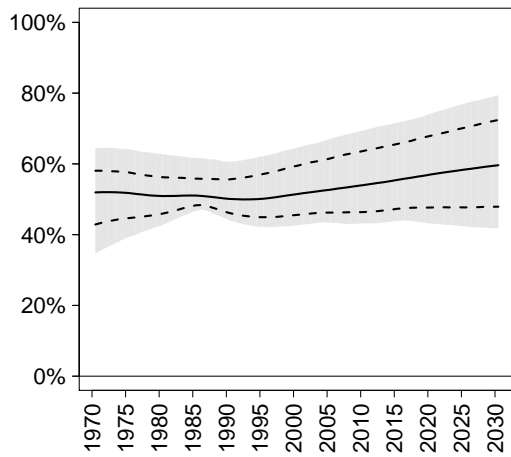

**CP (modern)**

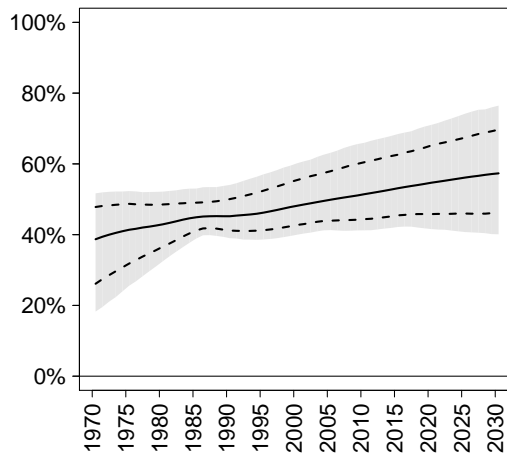

**CP (traditional)**

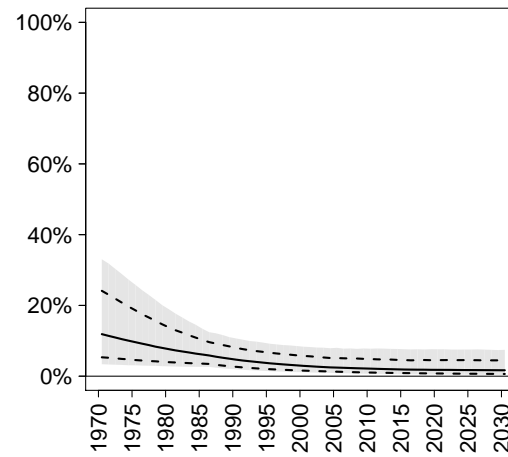

**Unmet need among all unmarried women**

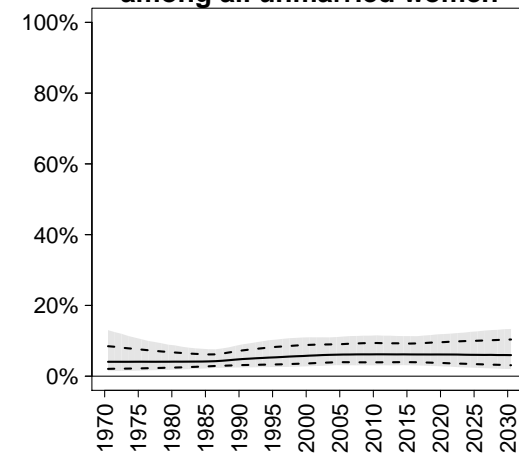

**Total demand**

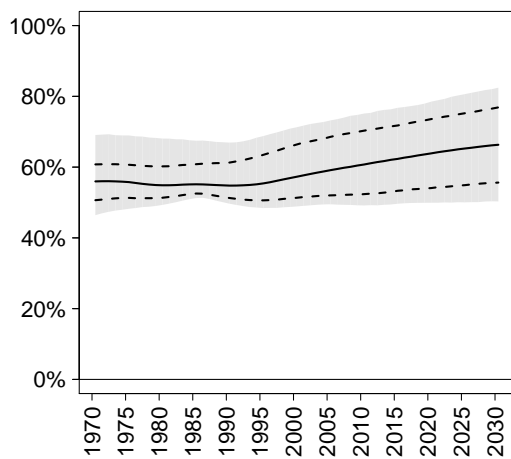

**Demand satisfied (any method)**

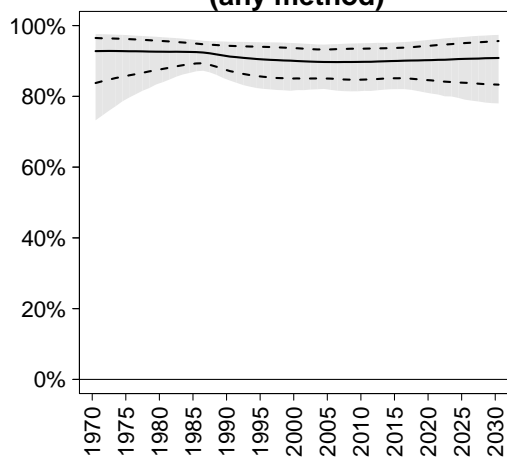

**Demand satisfied (modern methods)**

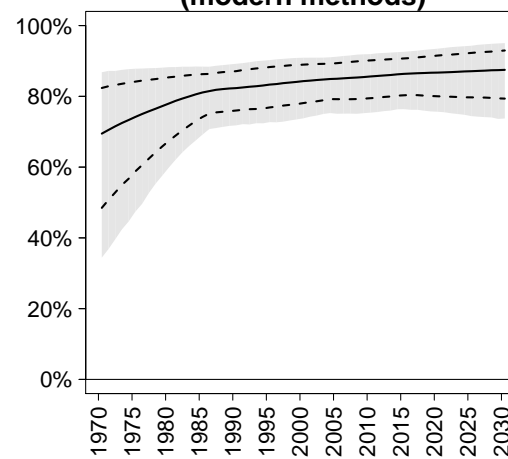

Uzbekistan --- All women

**CP (any)**

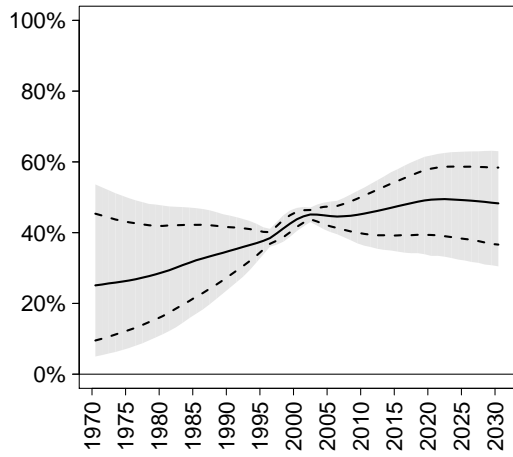

**CP (modern)**

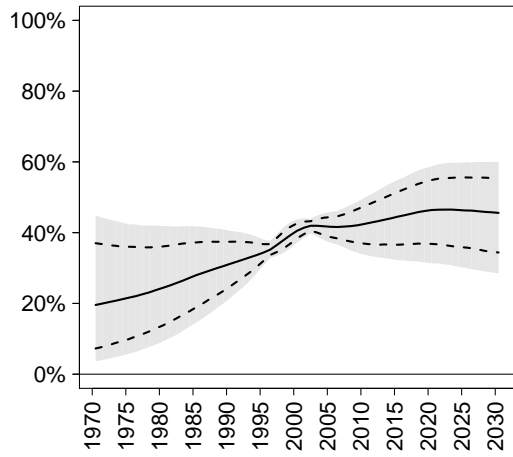

**CP (traditional)**

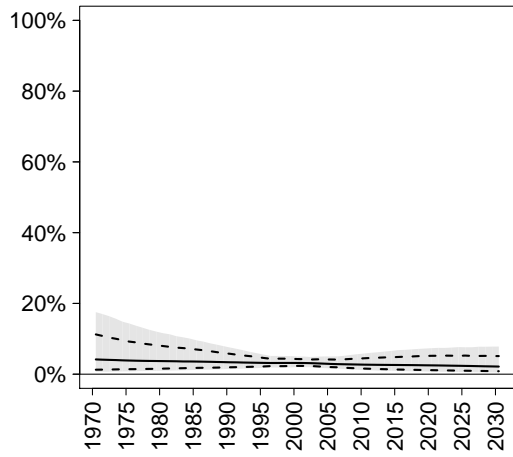

**Unmet need among all unmarried women**

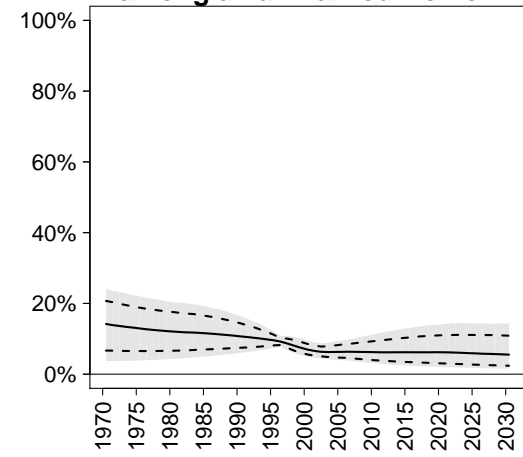

**Total demand**

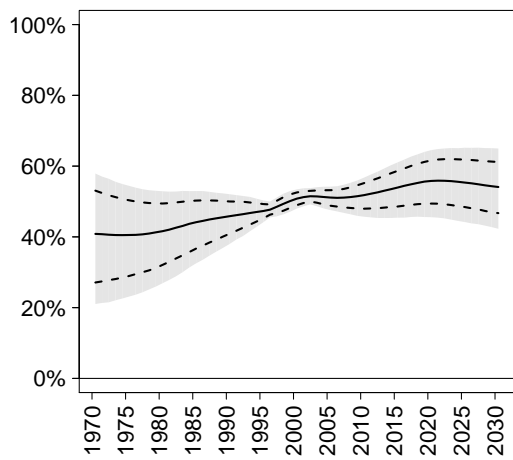

**Demand satisfied (any method)**

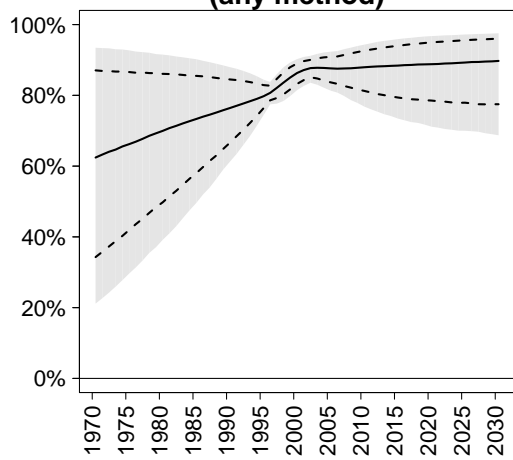

**Demand satisfied (modern methods)**

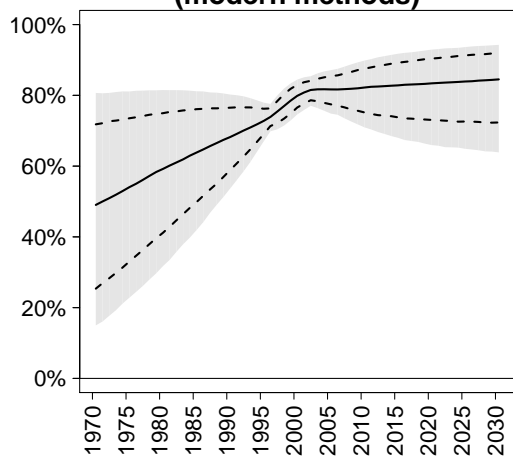

Vanuatu --- All women

**CP (any)**

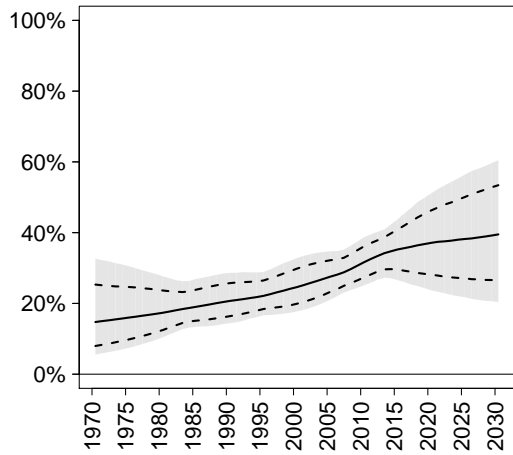

**CP (modern)**

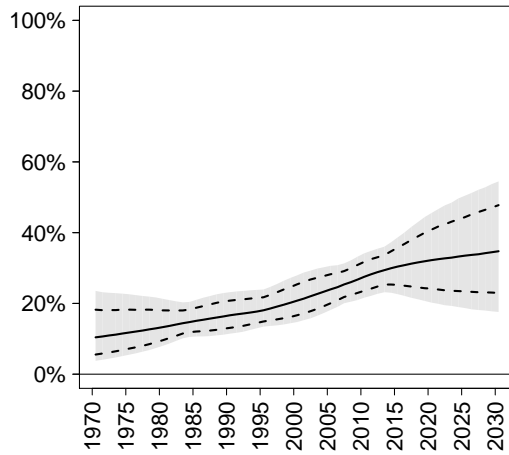

**CP (traditional)**

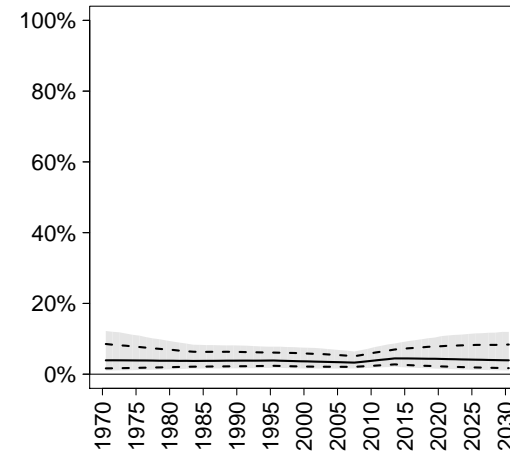

**Unmet need among all unmarried women**

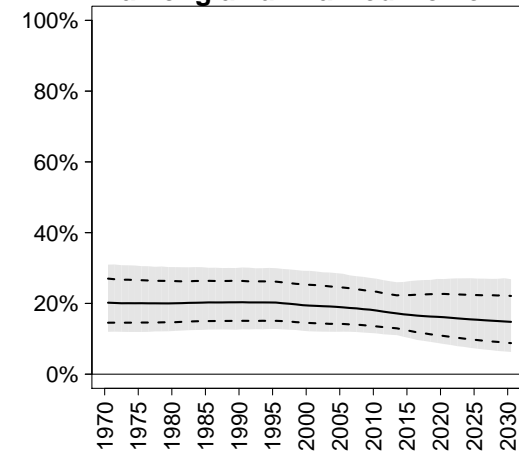

**Total demand**

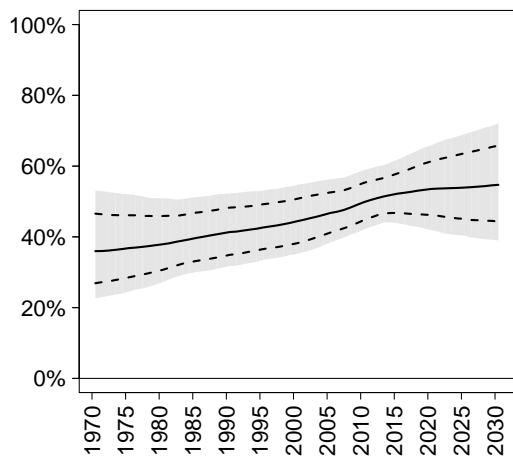

**Demand satisfied (any method)**

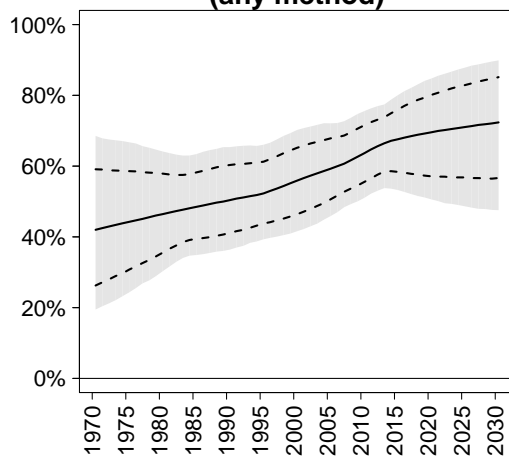

**Demand satisfied (modern methods)**

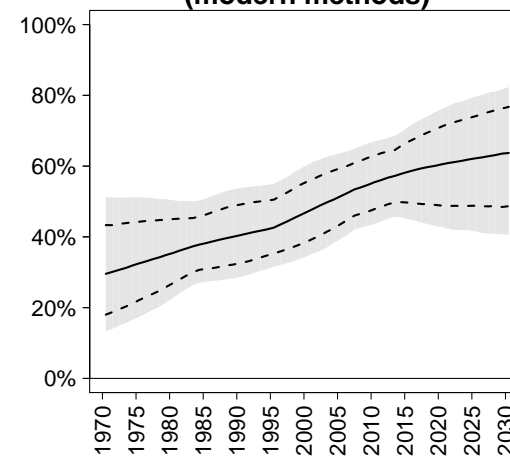

Venezuela (Bolivarian Republic of) --- All women

**CP (any)**

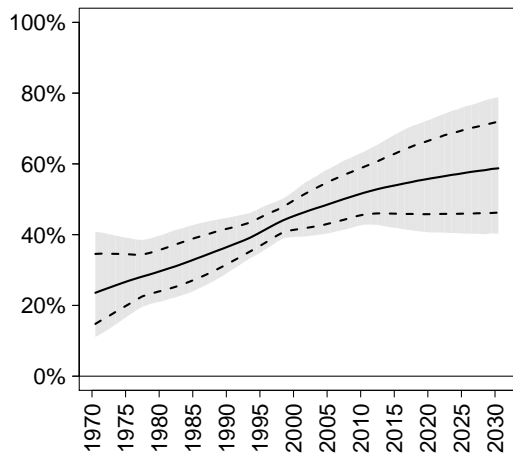

**CP (modern)**

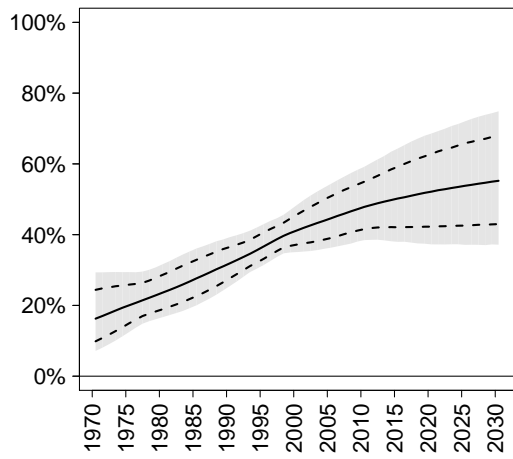

**CP (traditional)**

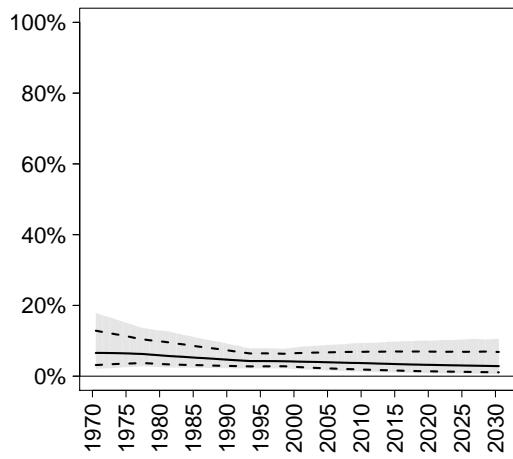

**Unmet need among all unmarried women**

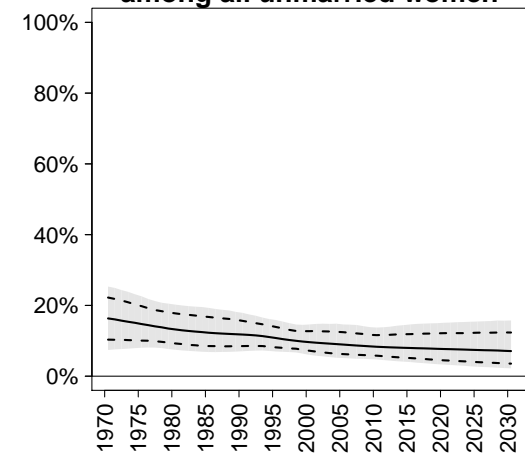

**Total demand**

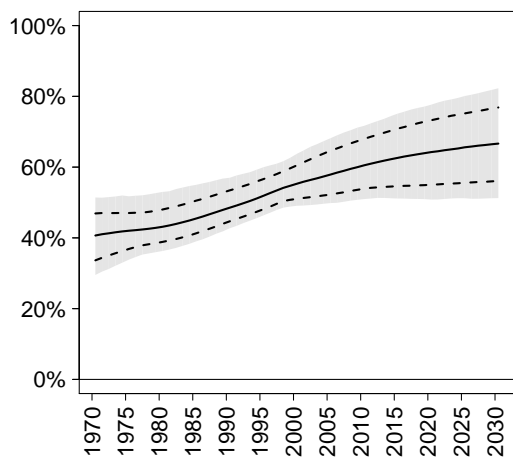

**Demand satisfied (any method)**

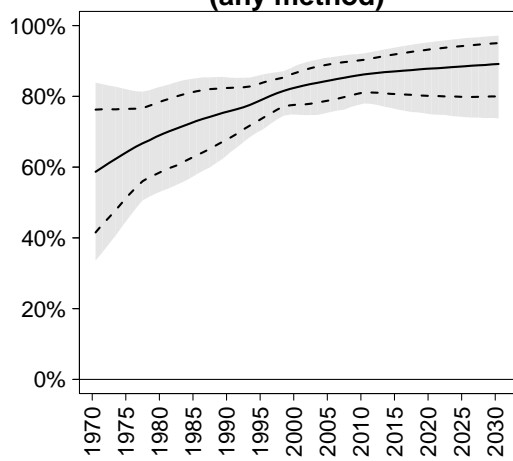

**Demand satisfied (modern methods)**

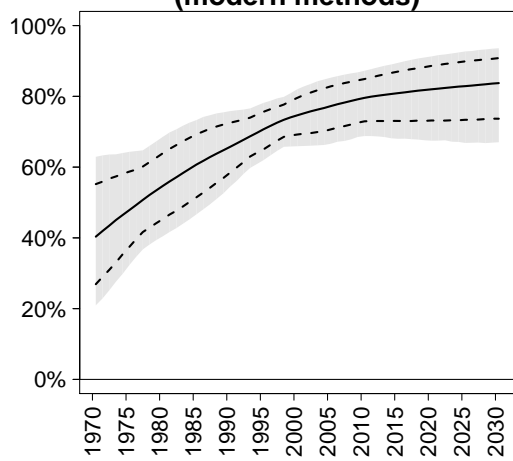

Viet Nam --- All women

**CP (any)**

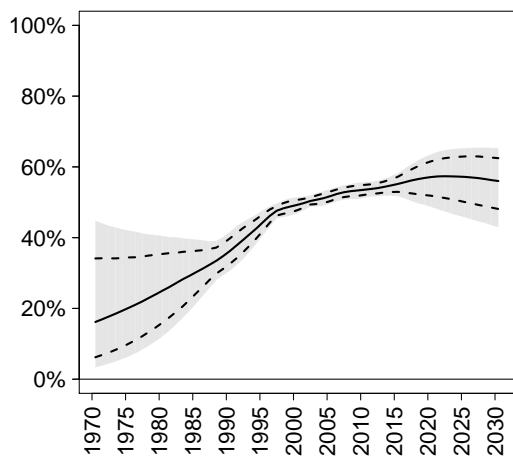

**CP (modern)**

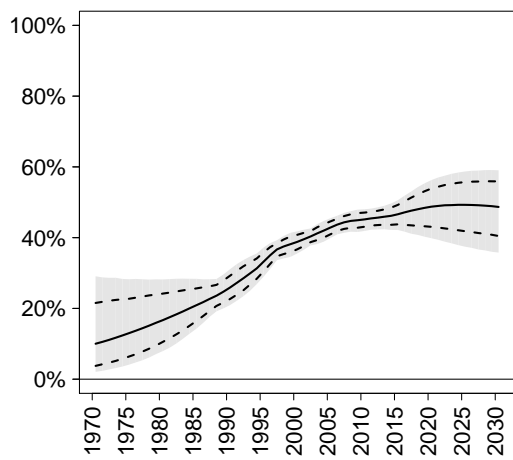

**CP (traditional)**

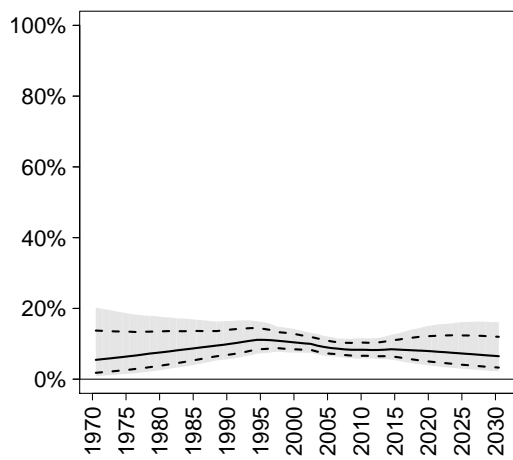

**Unmet need among all unmarried women**

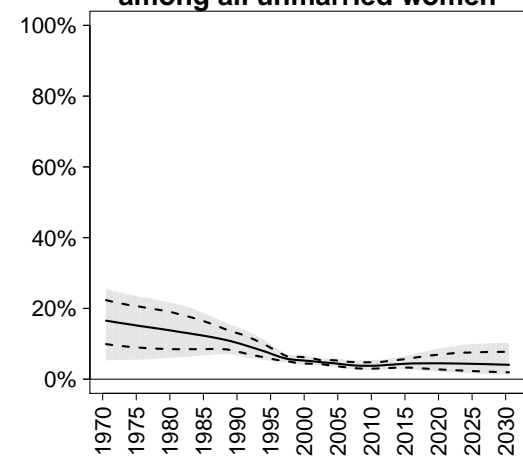

**Total demand**

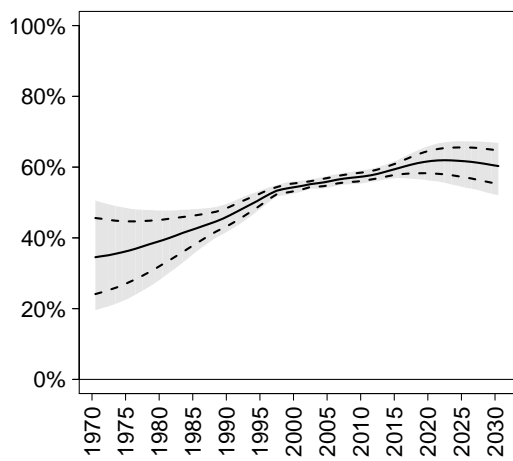

**Demand satisfied (any method)**

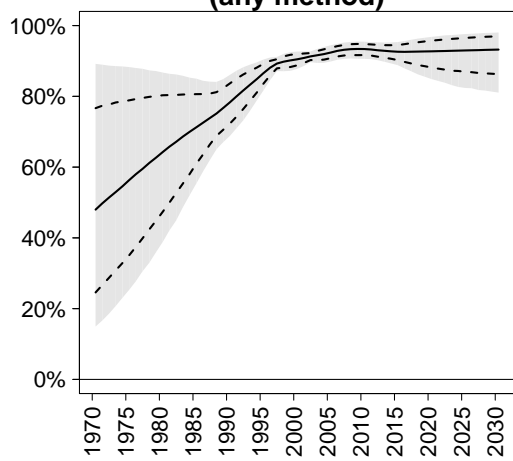

**Demand satisfied (modern methods)**

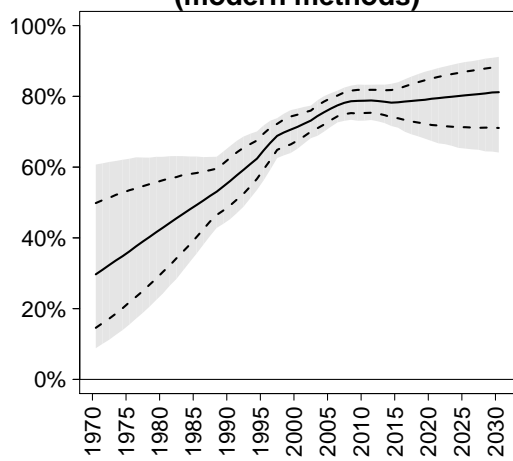



Yemen --- All women

**CP (any)**

**CP (modern)**

**CP (traditional)**

**Unmet need  
among all unmarried women**

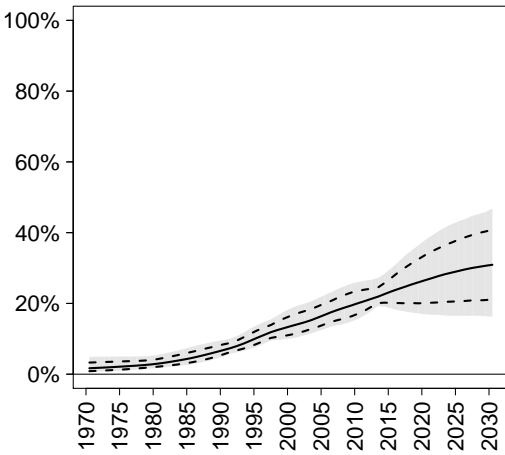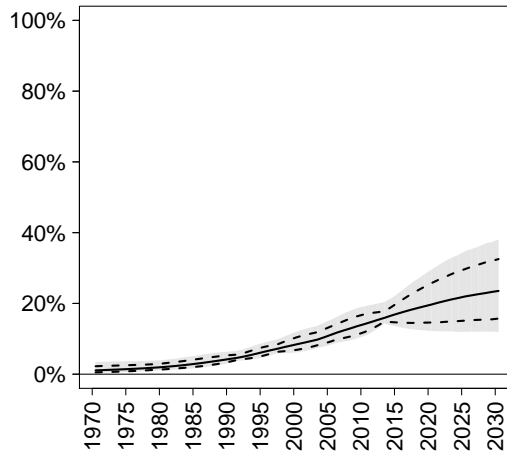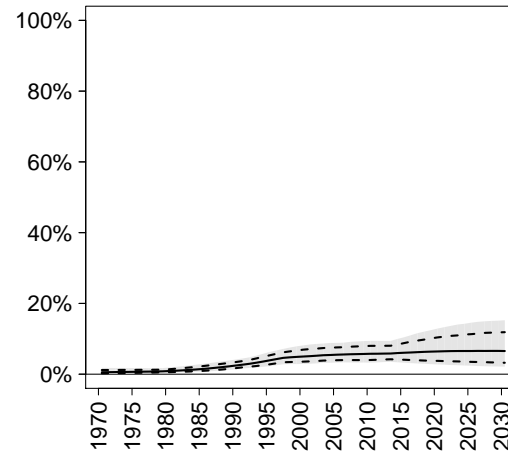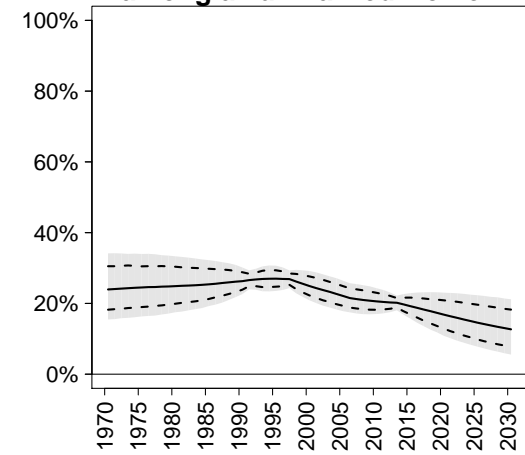

**Total demand**

**Demand satisfied  
(any method)**

**Demand satisfied  
(modern methods)**

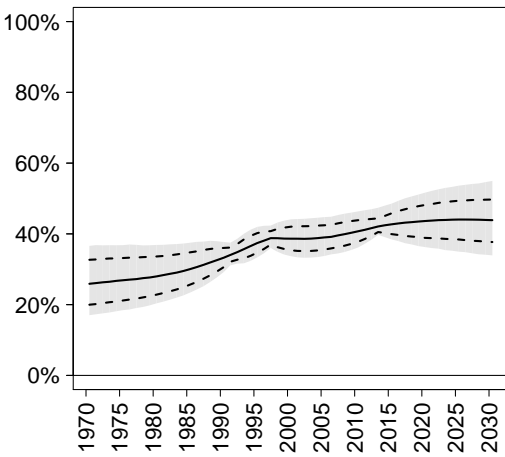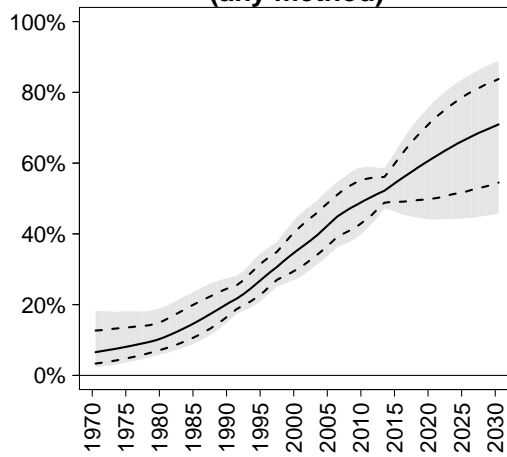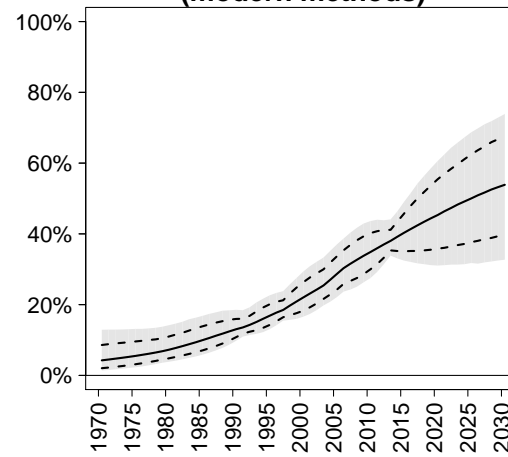

Zambia --- All women

**CP (any)**

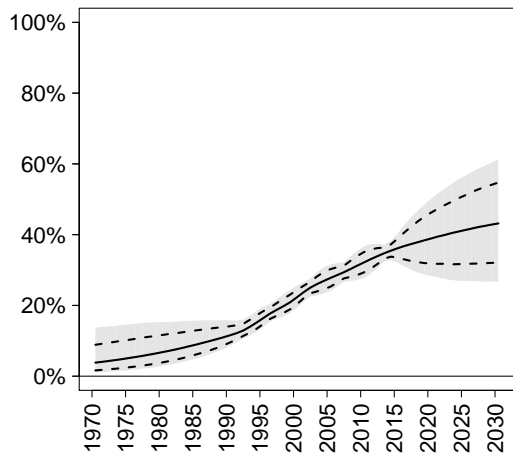

**CP (modern)**

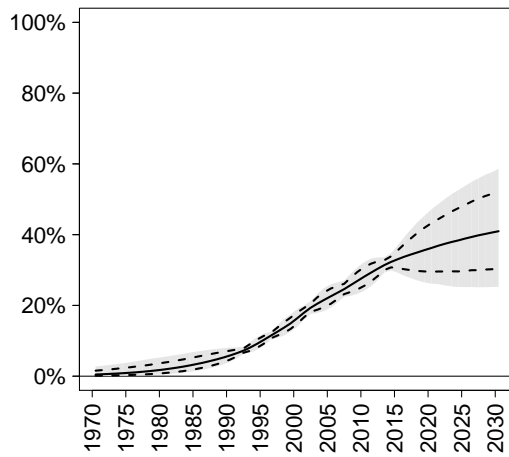

**CP (traditional)**

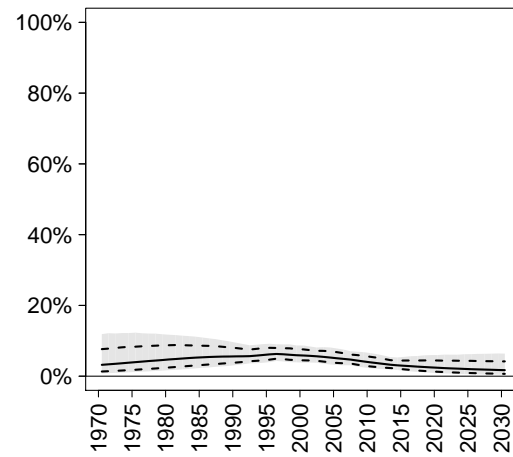

**Unmet need among all unmarried women**

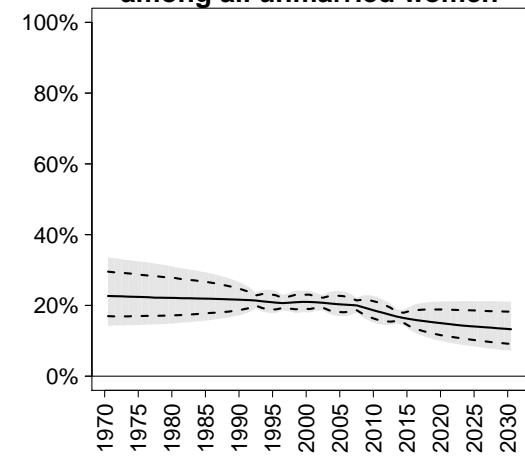

**Total demand**

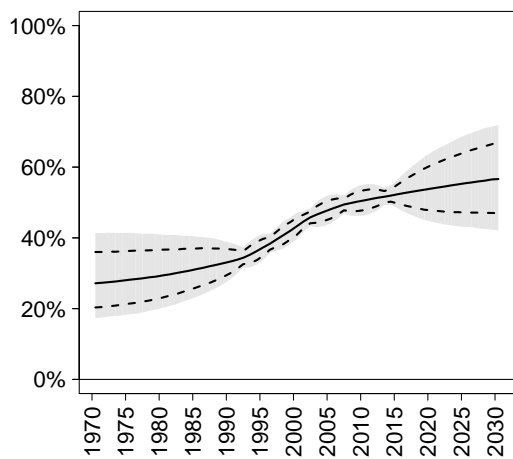

Zimbabwe ---- All women

**CP (any)**

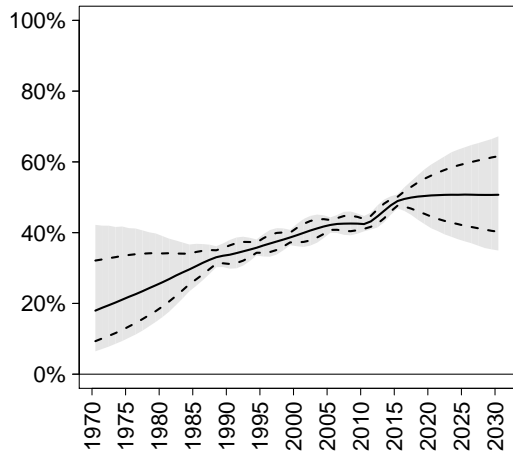

**CP (modern)**

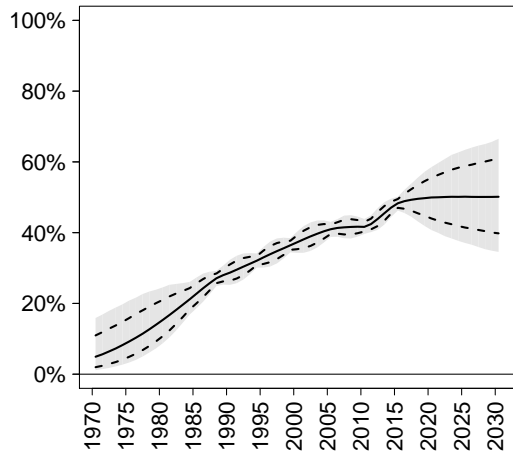

**CP (traditional)**

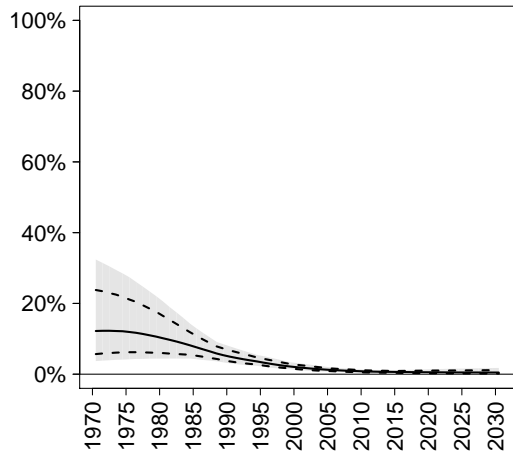

**Unmet need among all unmarried women**

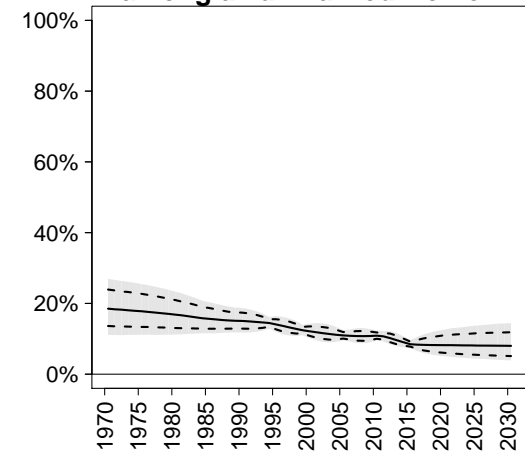

**Total demand**

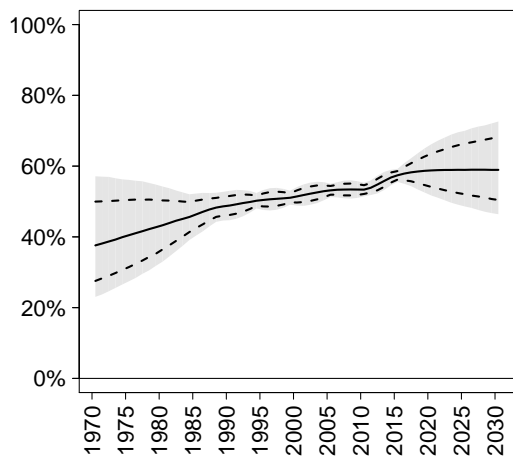

**Demand satisfied (any method)**

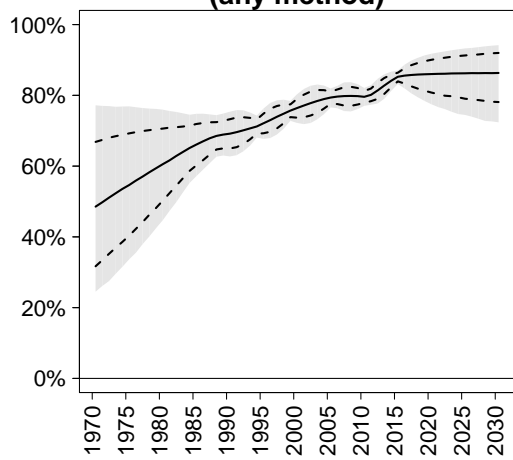

**Demand satisfied (modern methods)**

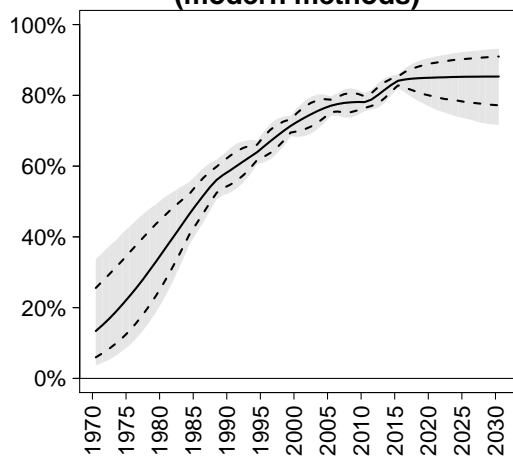

### 3.2 Country aggregates

World --- All women

**CP (any)**

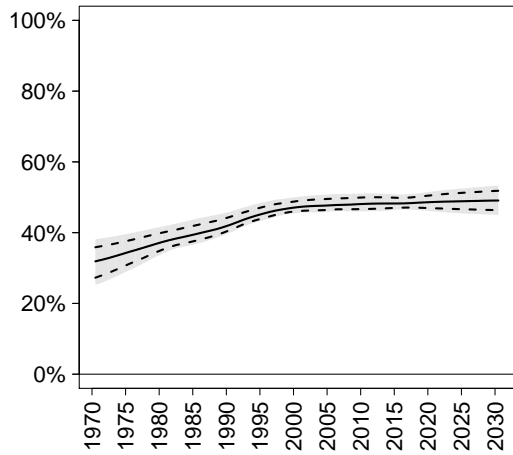

**CP (modern)**

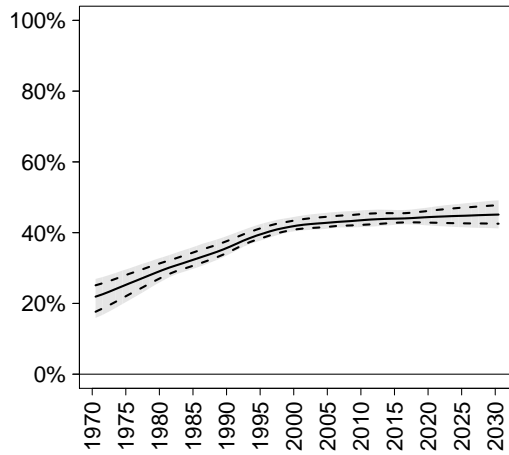

**CP (traditional)**

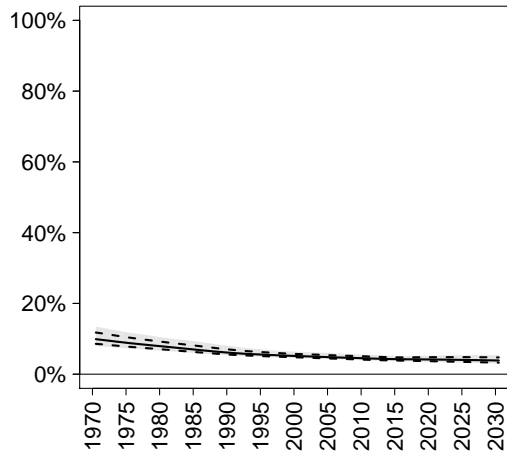

**Unmet need among all unmarried women**

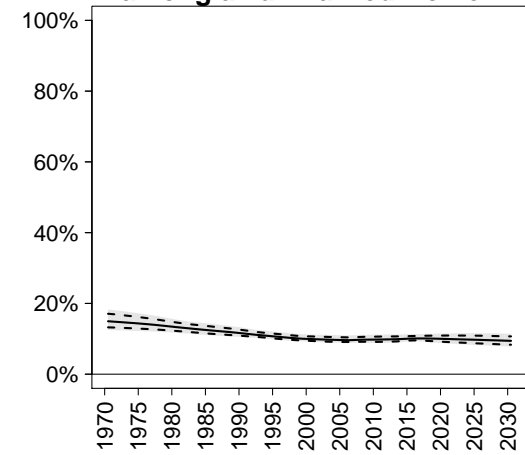

**Total demand**

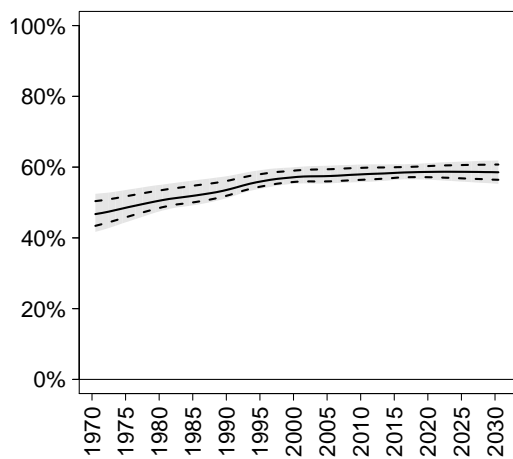

**Demand satisfied (any method)**

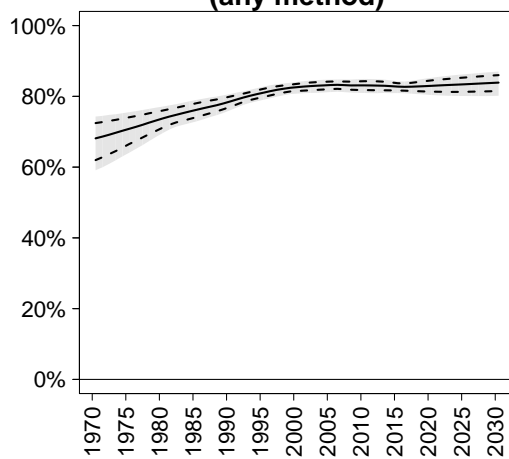

**Demand satisfied (modern methods)**

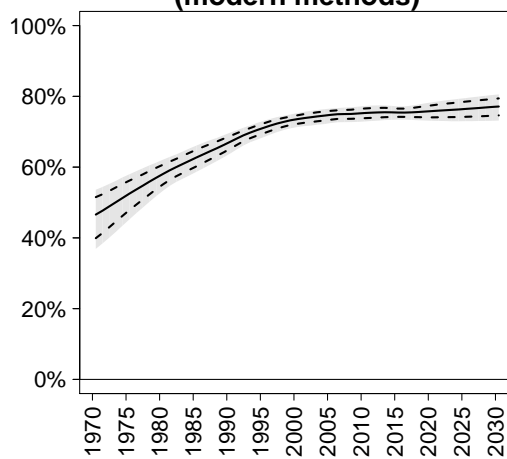

High-income countries --- All women

**CP (any)**

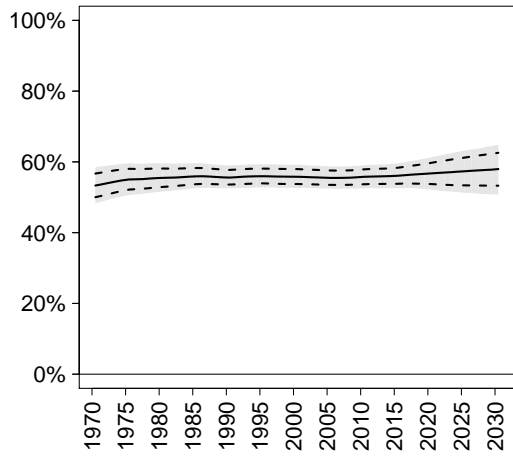

**CP (modern)**

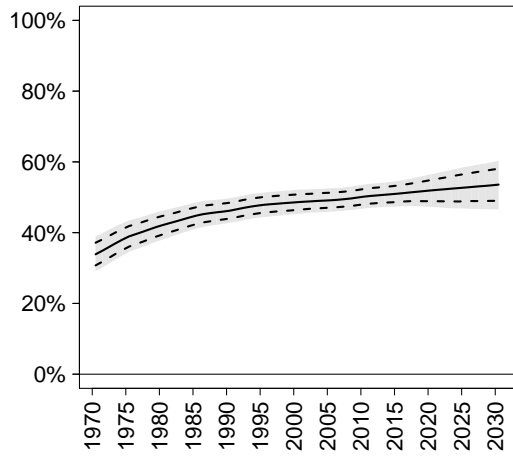

**CP (traditional)**

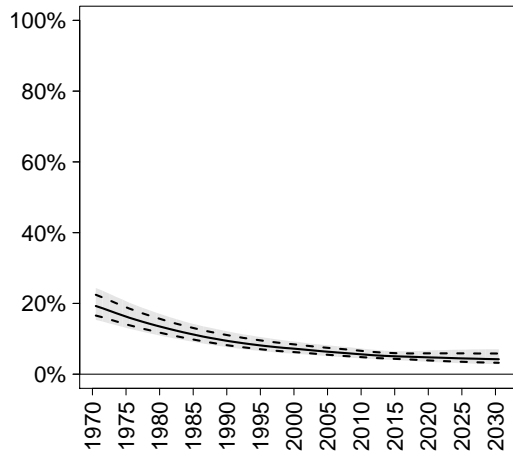

**Unmet need among all unmarried women**

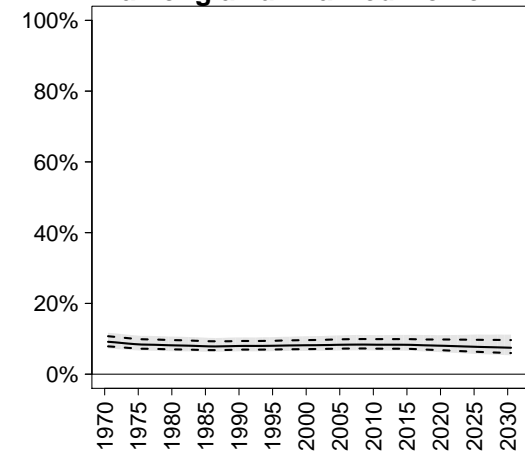

**Total demand**

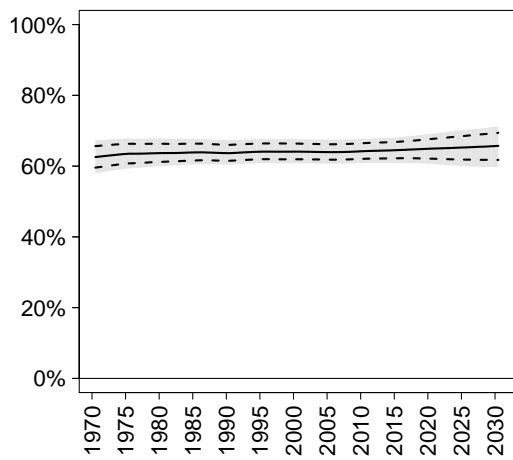

**Demand satisfied (any method)**

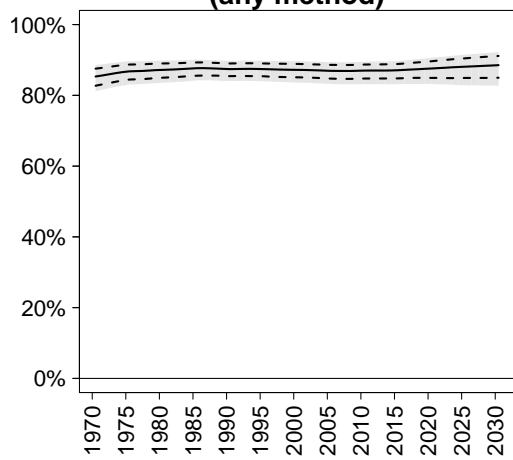

**Demand satisfied (modern methods)**

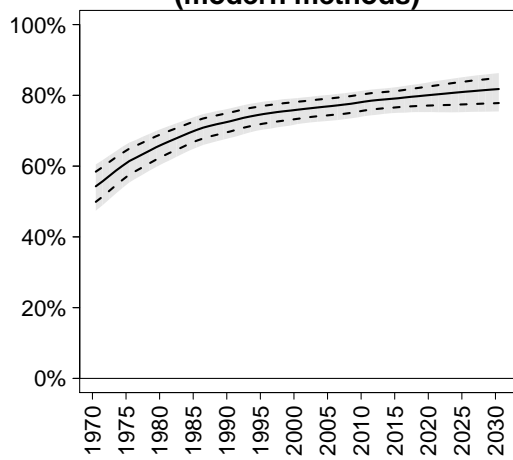

Upper-middle-income countries --- All women

**CP (any)**

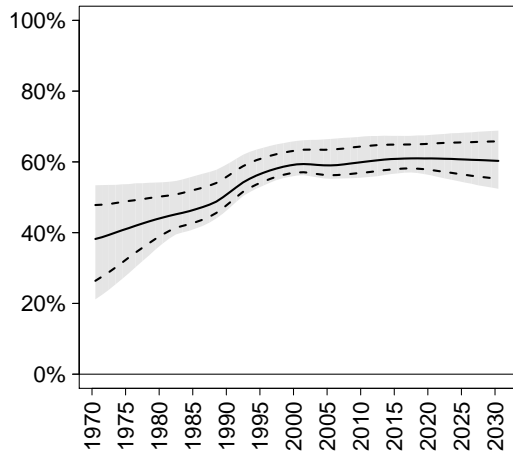

**CP (modern)**

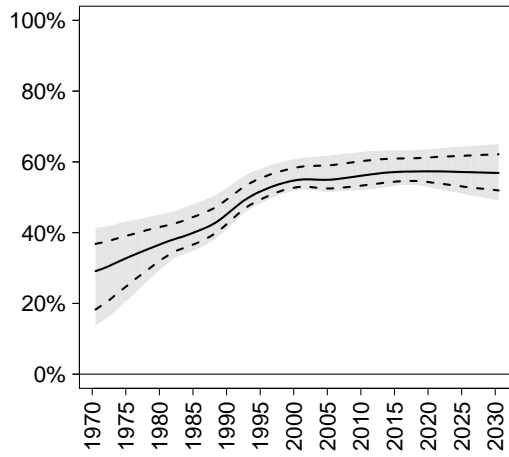

**CP (traditional)**

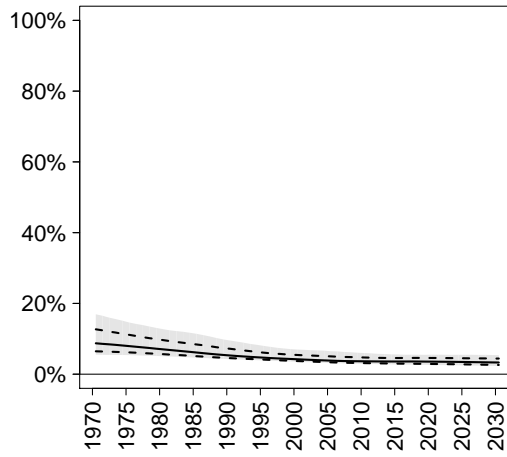

**Unmet need among all unmarried women**

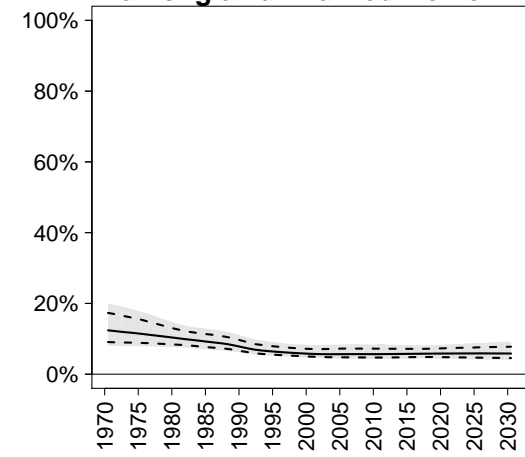

**Total demand**

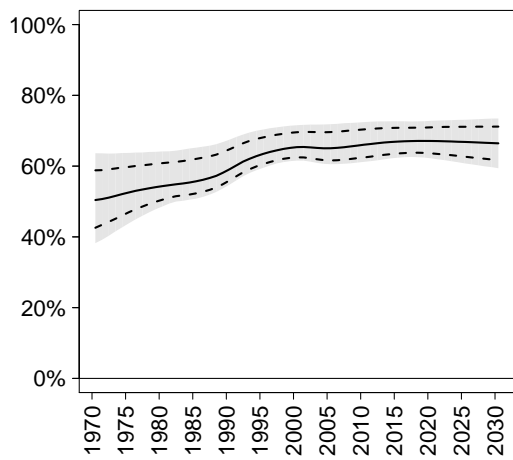

**Demand satisfied (any method)**

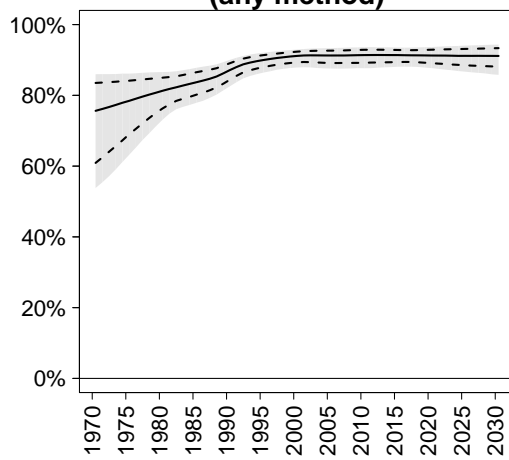

**Demand satisfied (modern methods)**

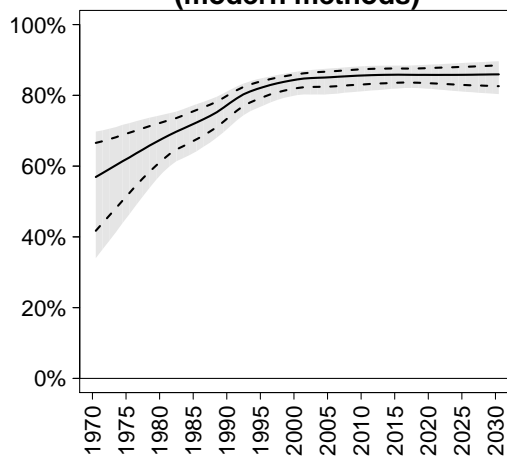

Lower-middle-income countries --- All women

**CP (any)**

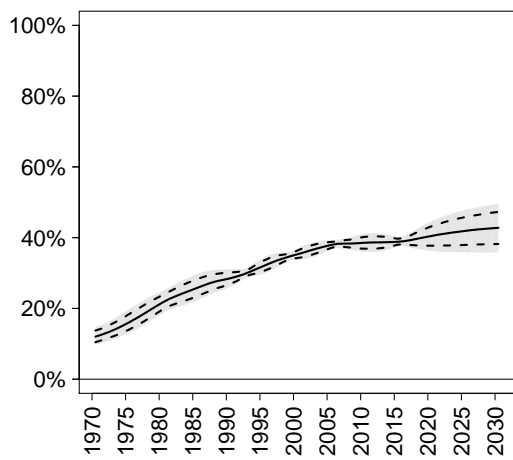

**CP (modern)**

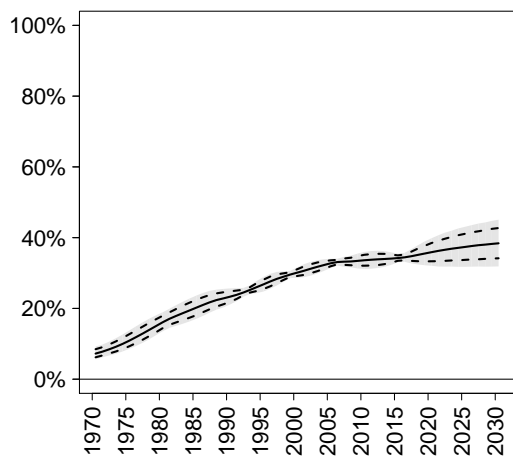

**CP (traditional)**

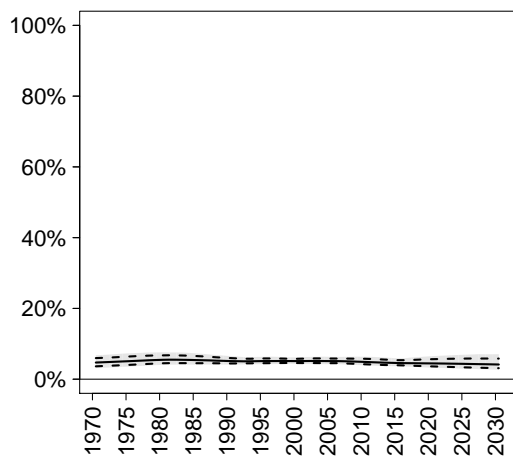

**Unmet need among all unmarried women**

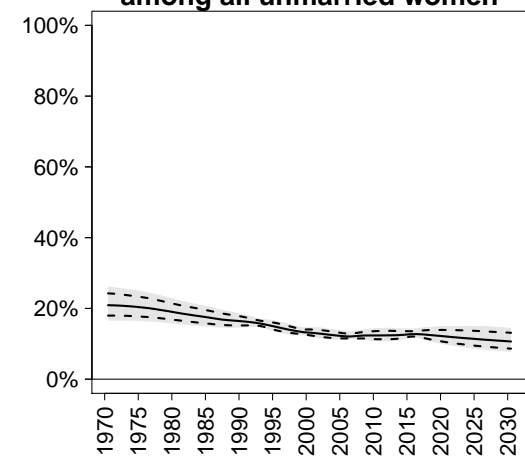

**Total demand**

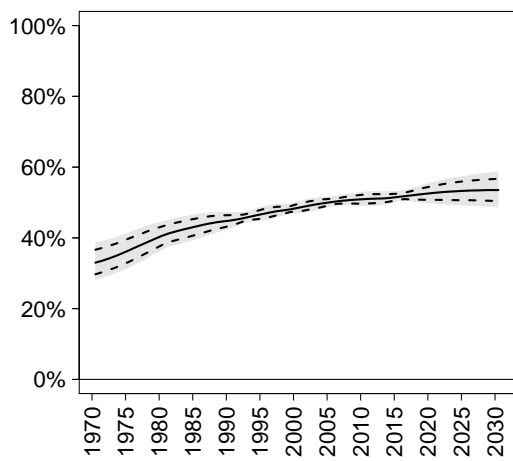

**Demand satisfied (any method)**

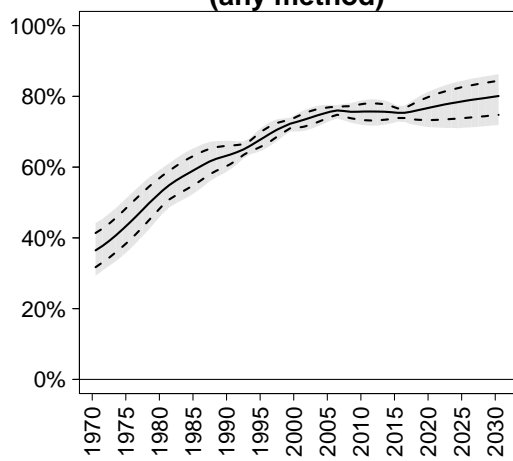

**Demand satisfied (modern methods)**

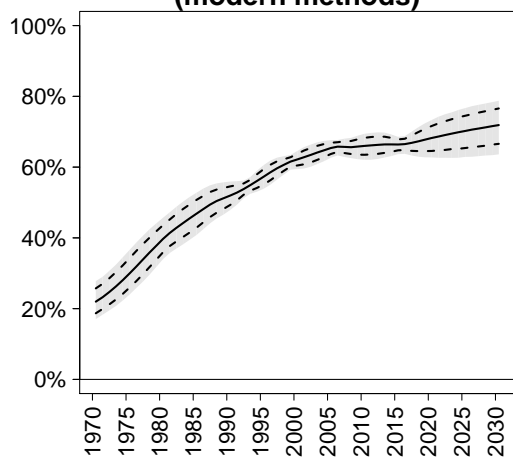



Low-income countries --- All women

**CP (any)**

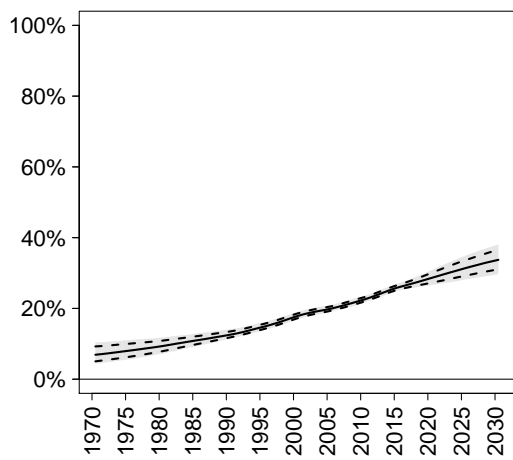

**CP (modern)**

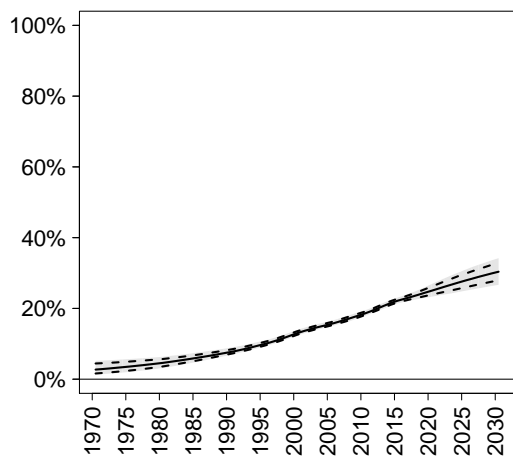

**CP (traditional)**

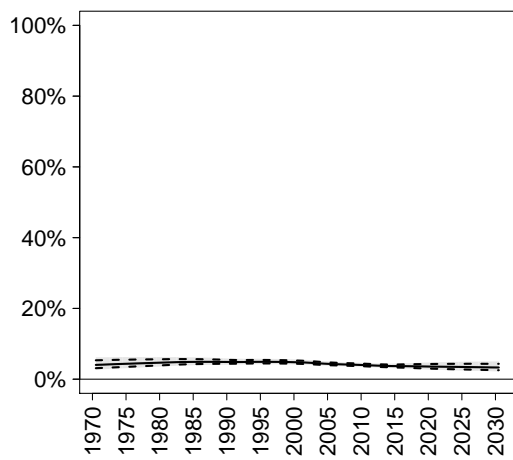

**Unmet need among all unmarried women**

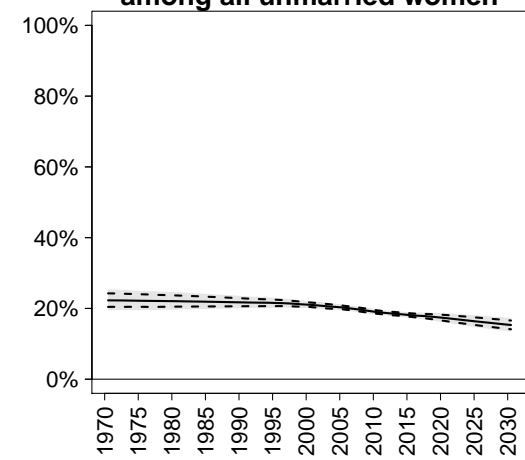

**Total demand**

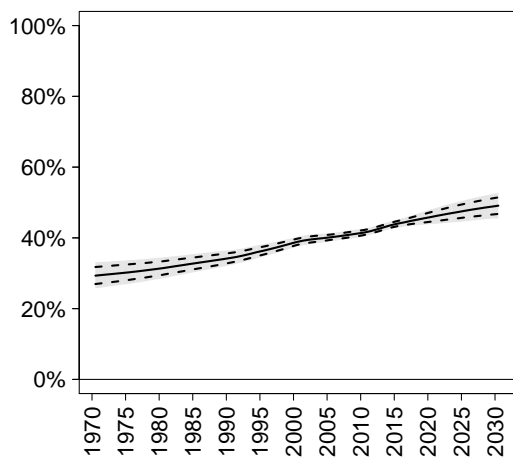

**Demand satisfied (any method)**

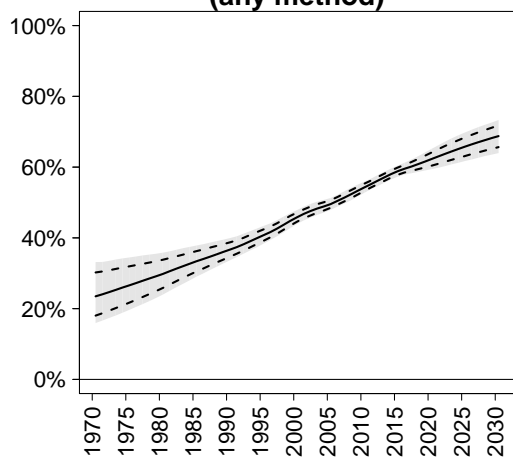

**Demand satisfied (modern methods)**

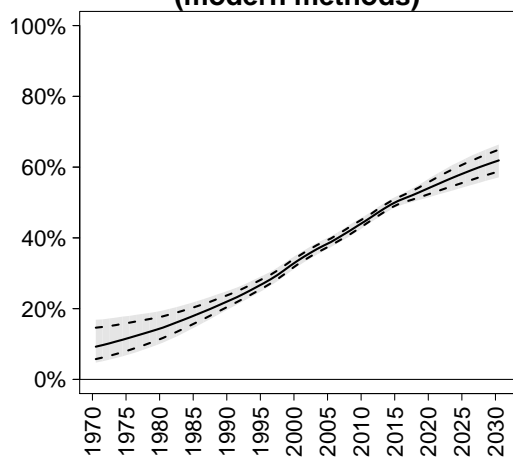

Africa --- All women

**CP (any)**

**CP (modern)**

**CP (traditional)**

**Unmet need among all unmarried women**

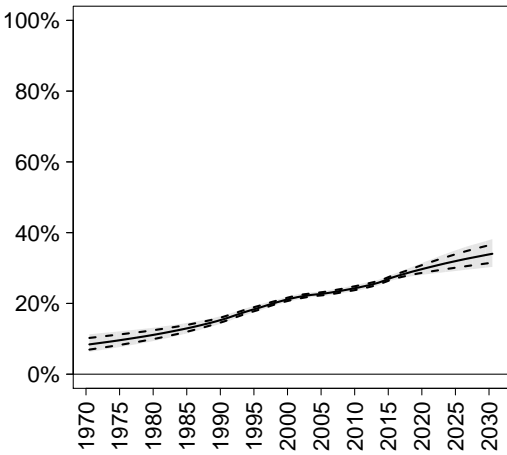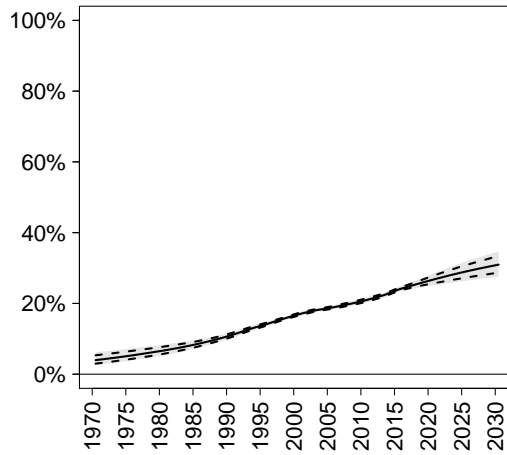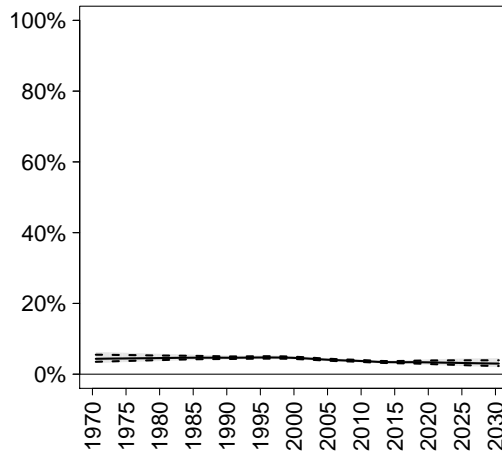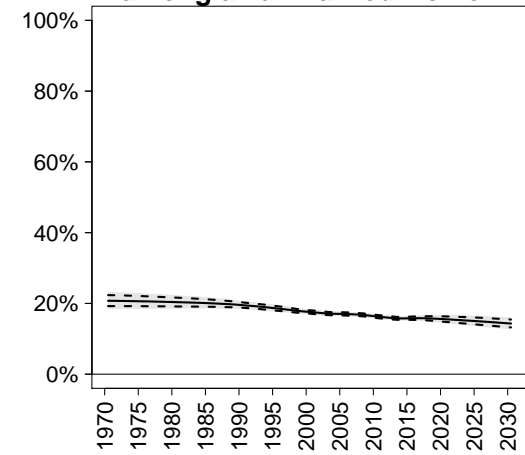

**Total demand**

**Demand satisfied (any method)**

**Demand satisfied (modern methods)**

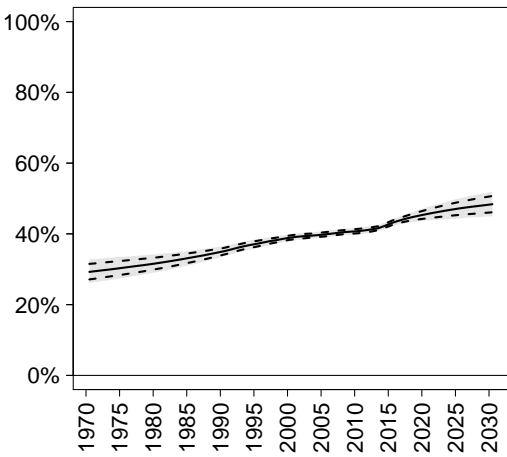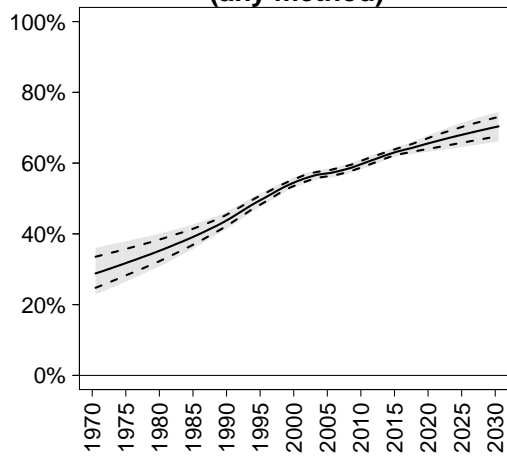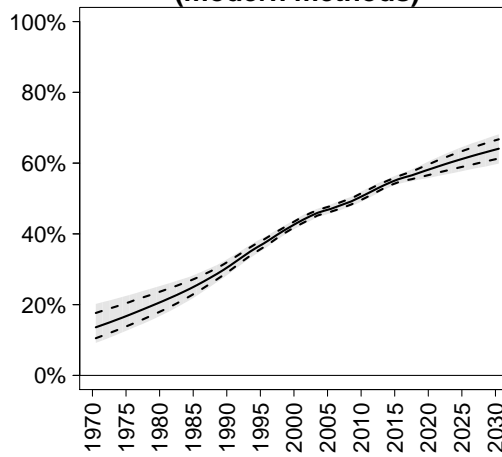

Eastern Africa --- All women

**CP (any)**

**CP (modern)**

**CP (traditional)**

**Unmet need  
among all unmarried women**

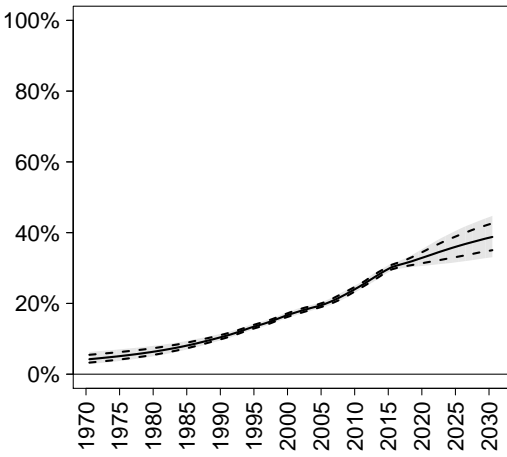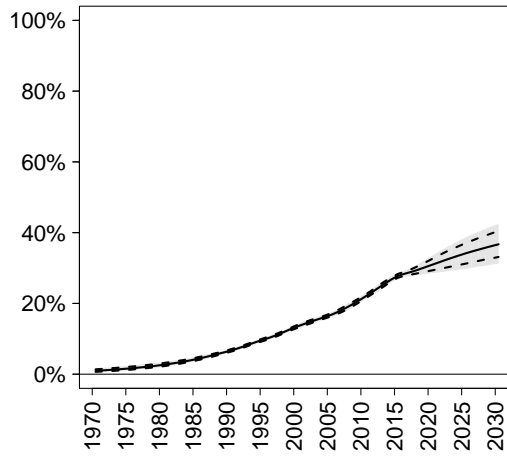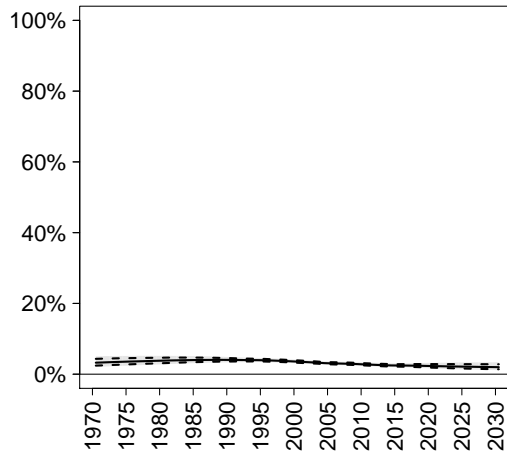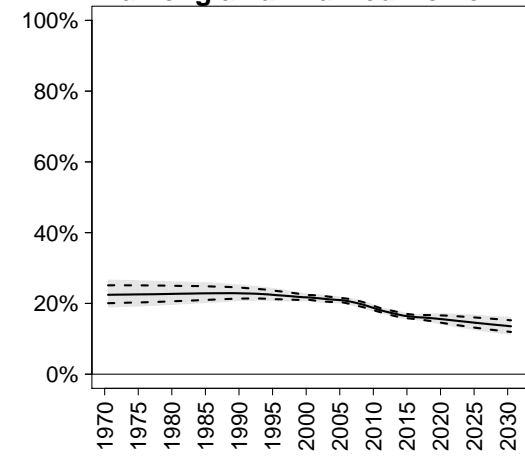

**Total demand**

**Demand satisfied  
(any method)**

**Demand satisfied  
(modern methods)**

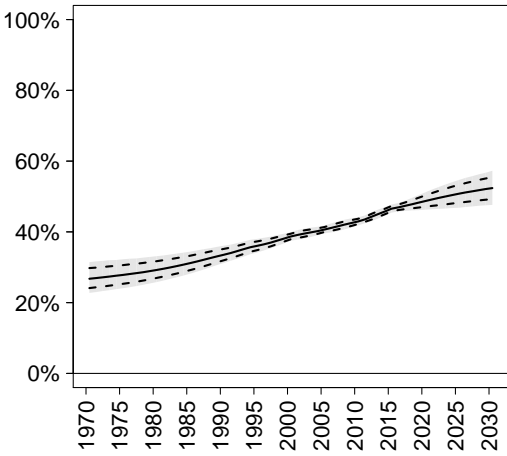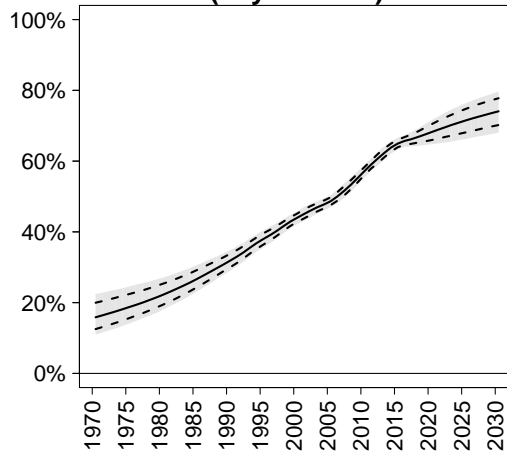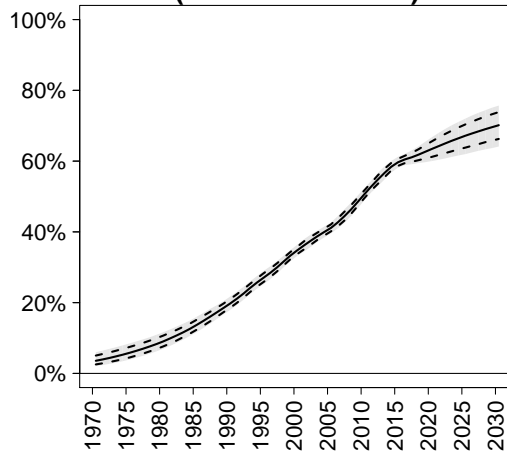

Middle Africa --- All women

**CP (any)**

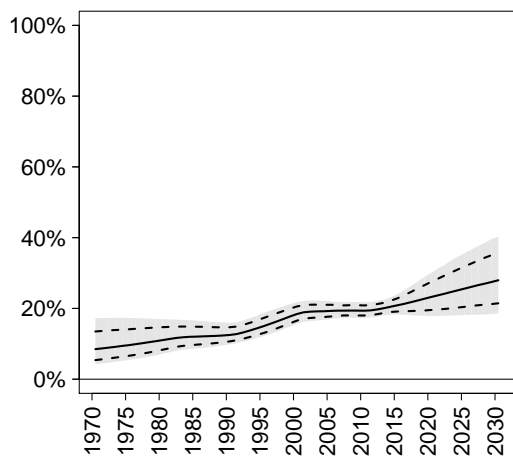

**CP (modern)**

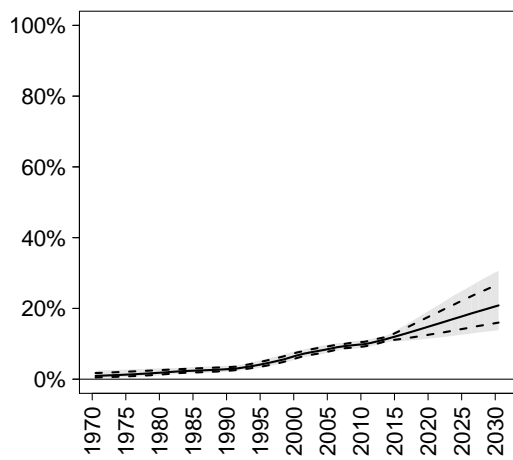

**CP (traditional)**

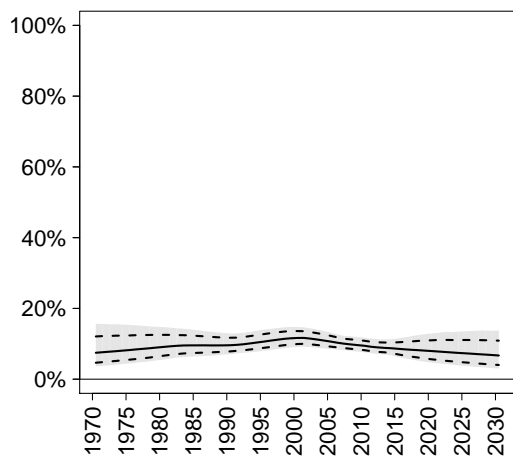

**Unmet need among all unmarried women**

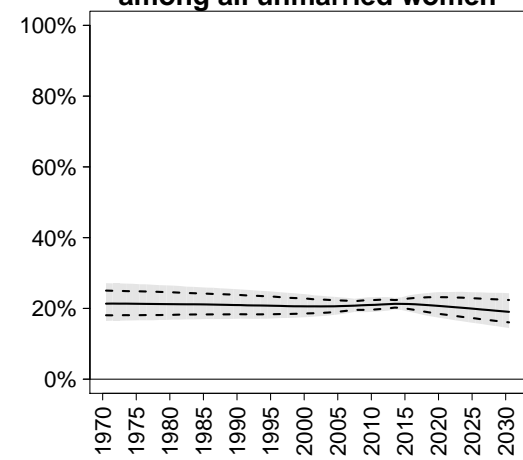

**Total demand**

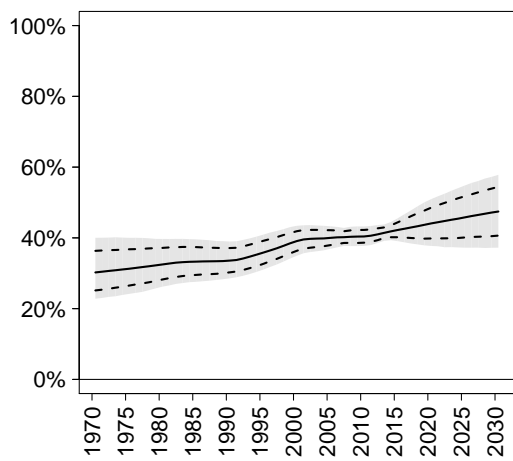

**Demand satisfied (any method)**

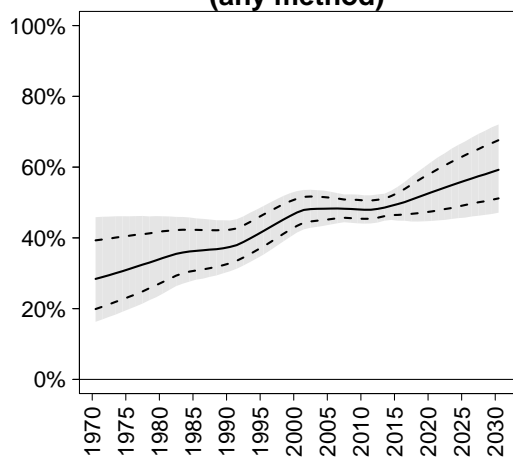

**Demand satisfied (modern methods)**

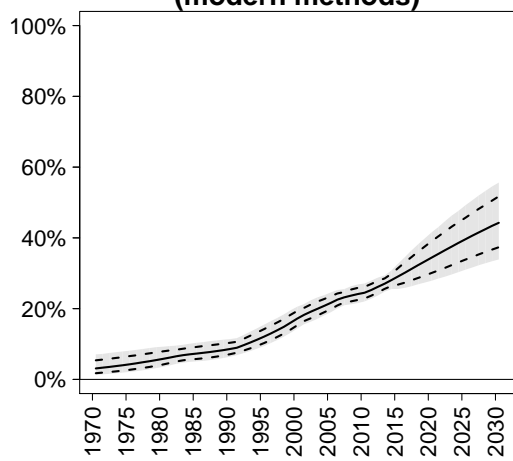

Northern Africa --- All women

**CP (any)**

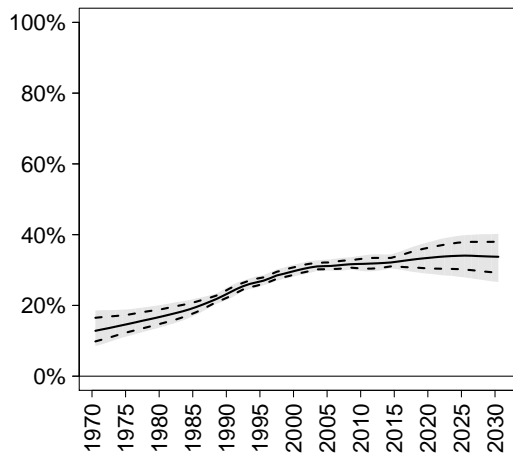

**CP (modern)**

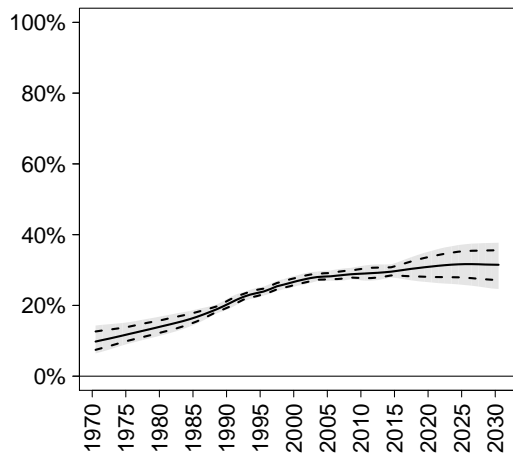

**CP (traditional)**

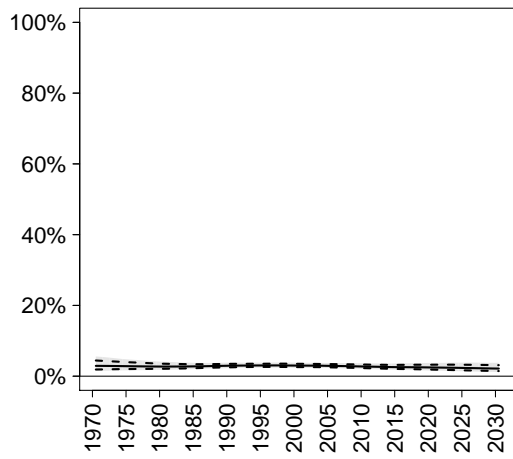

**Unmet need among all unmarried women**

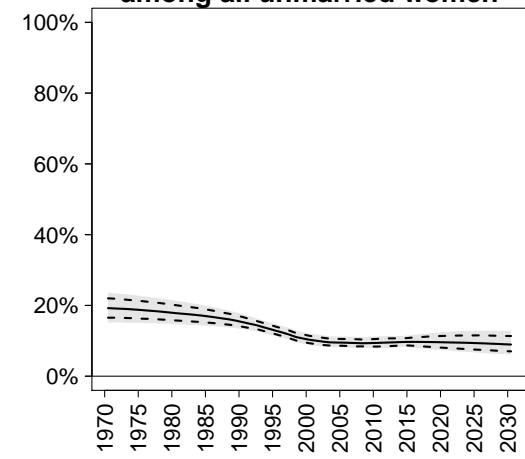

**Total demand**

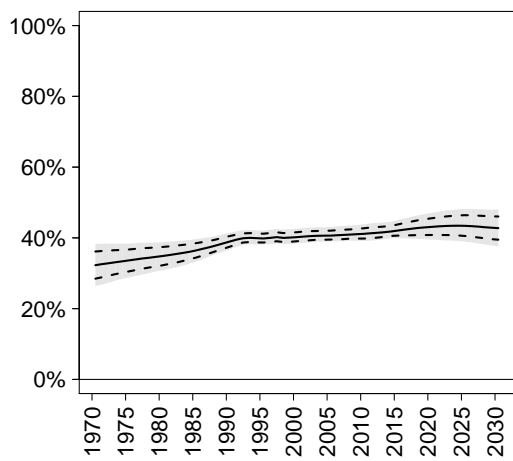

**Demand satisfied (any method)**

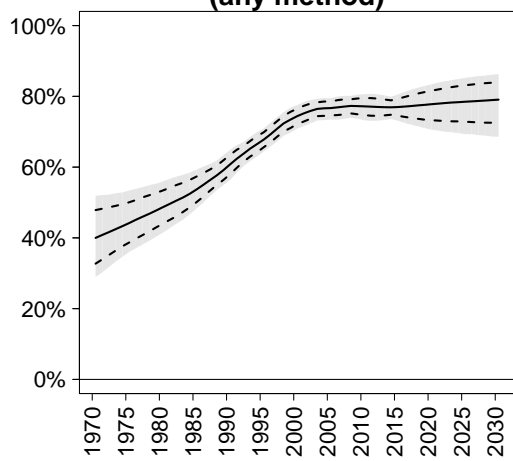

**Demand satisfied (modern methods)**

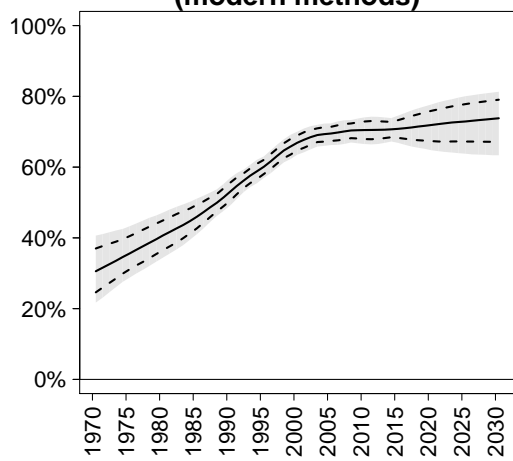

Southern Africa --- All women

**CP (any)**

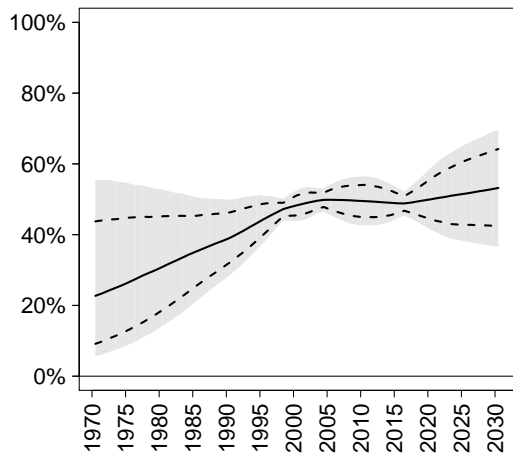

**CP (modern)**

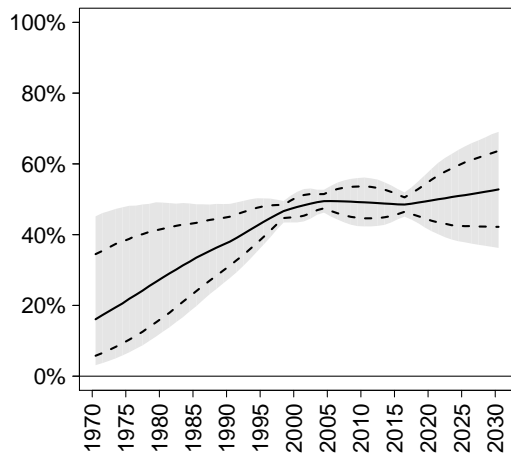

**CP (traditional)**

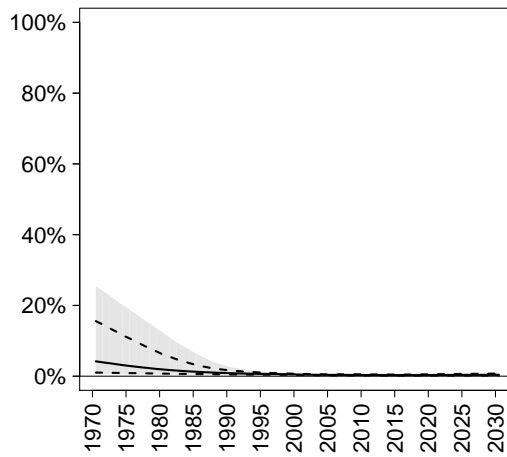

**Unmet need among all unmarried women**

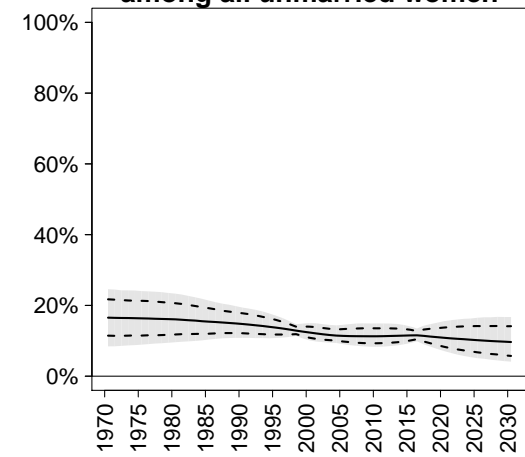

**Total demand**

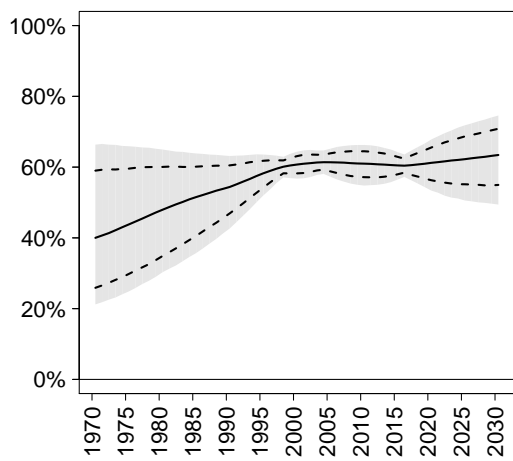

**Demand satisfied (any method)**

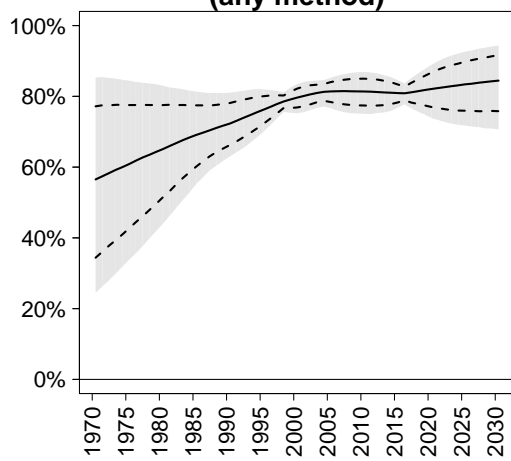

**Demand satisfied (modern methods)**

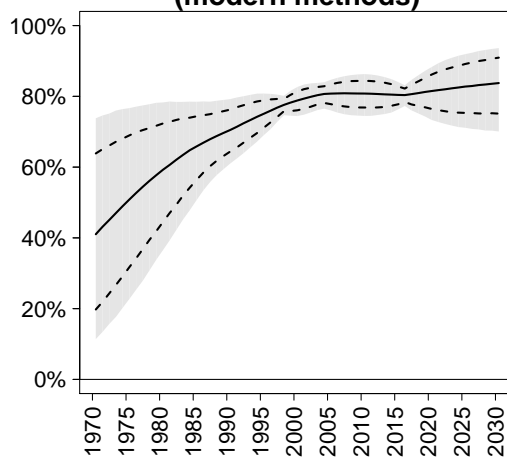

Western Africa --- All women

**CP (any)**

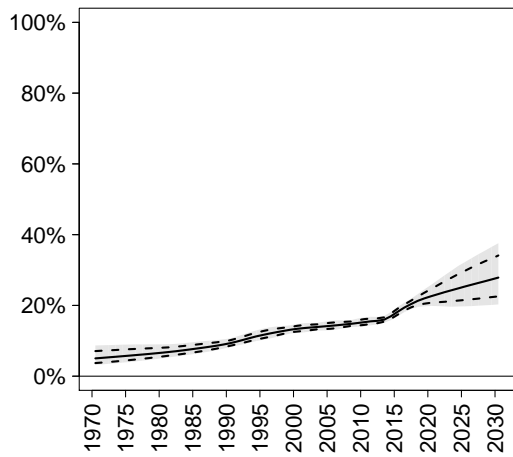

**CP (modern)**

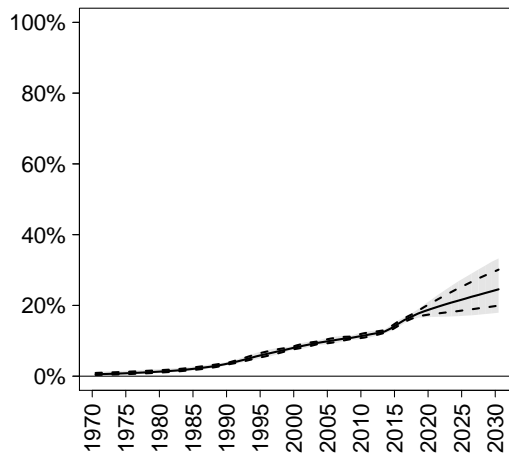

**CP (traditional)**

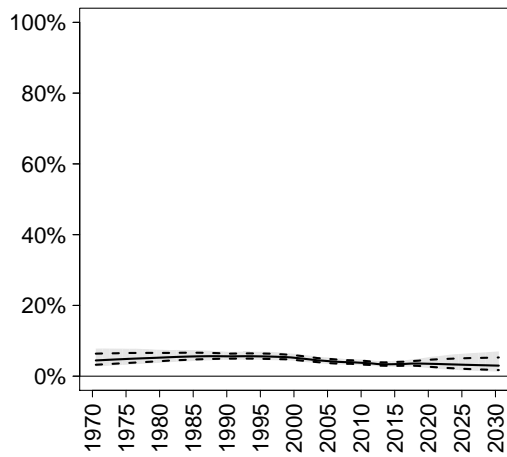

**Unmet need among all unmarried women**

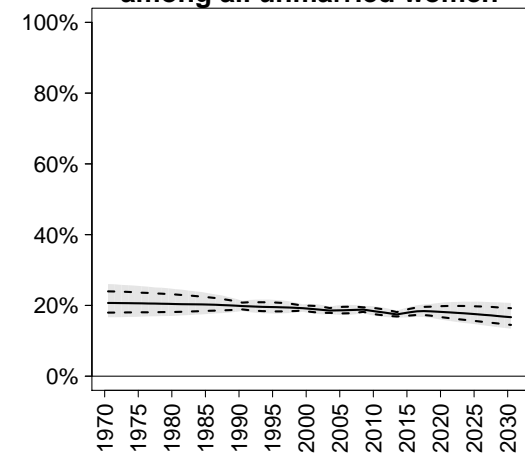

**Total demand**

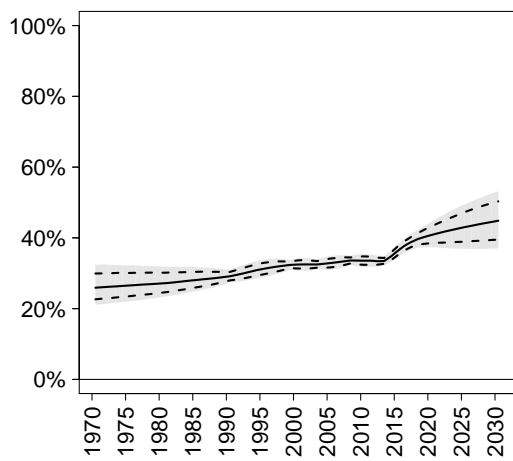

**Demand satisfied (any method)**

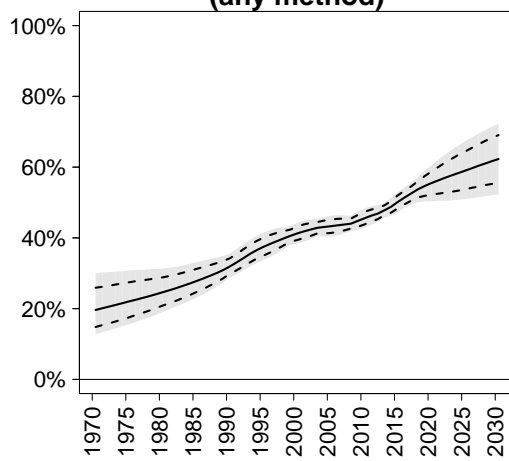

**Demand satisfied (modern methods)**

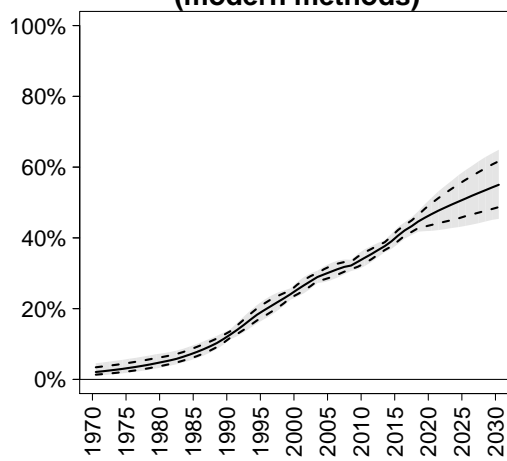

Asia --- All women

**CP (any)**

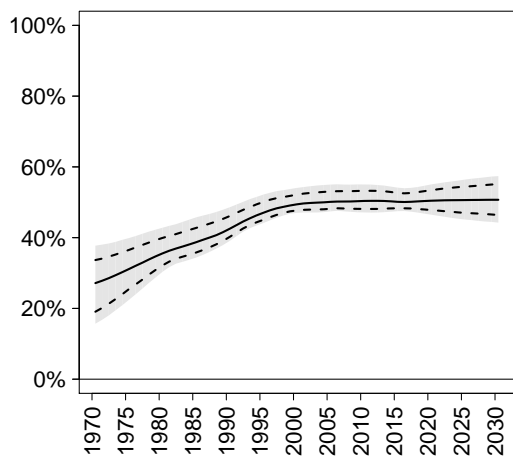

**CP (modern)**

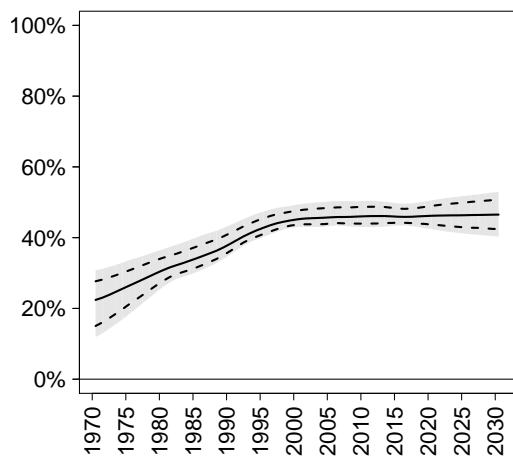

**CP (traditional)**

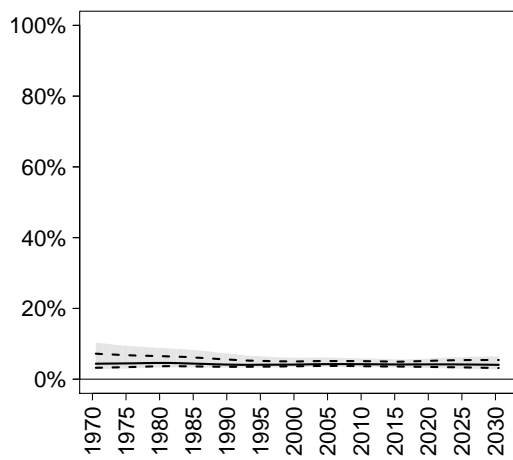

**Unmet need among all unmarried women**

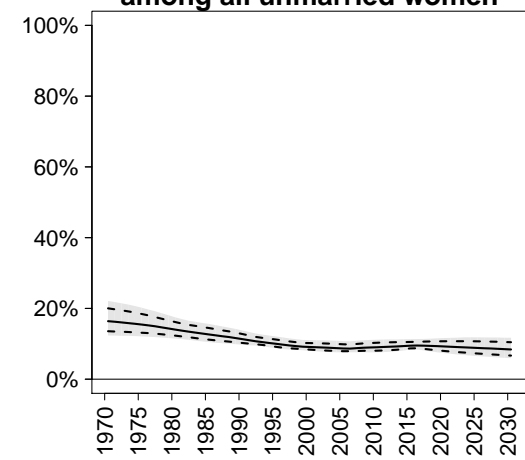

**Total demand**

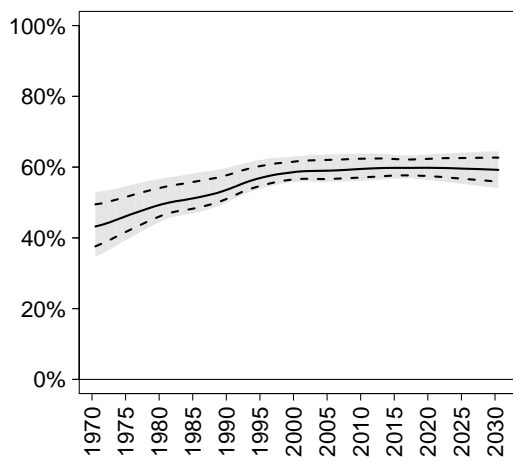

**Demand satisfied (any method)**

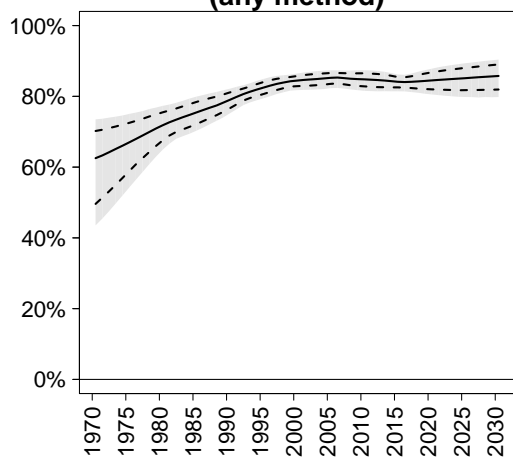

**Demand satisfied (modern methods)**

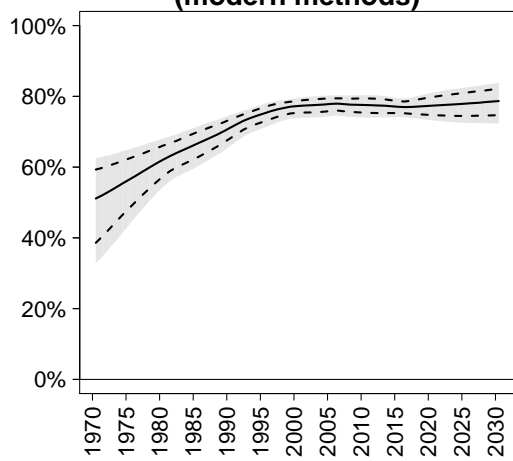



Central Asia --- All women

**CP (any)**

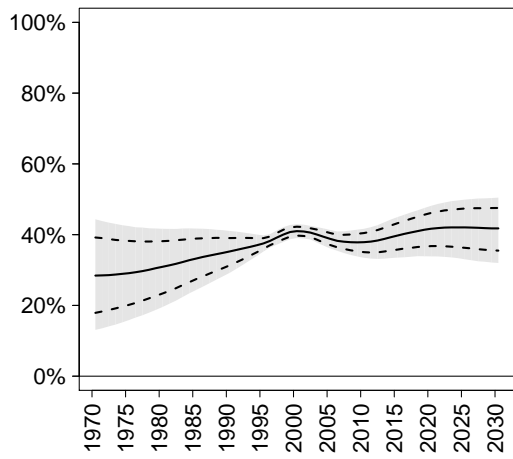

**CP (modern)**

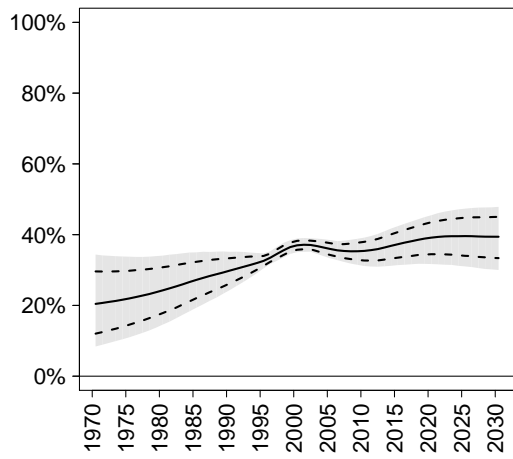

**CP (traditional)**

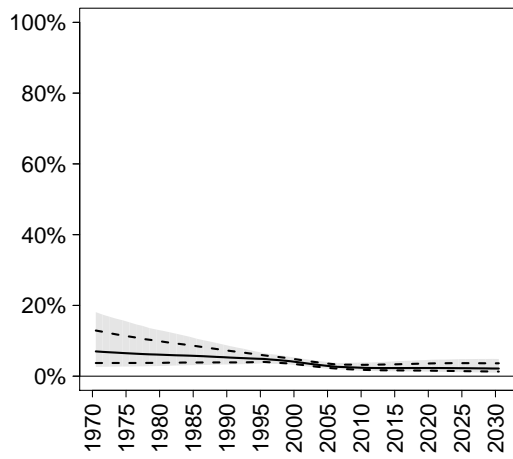

**Unmet need among all unmarried women**

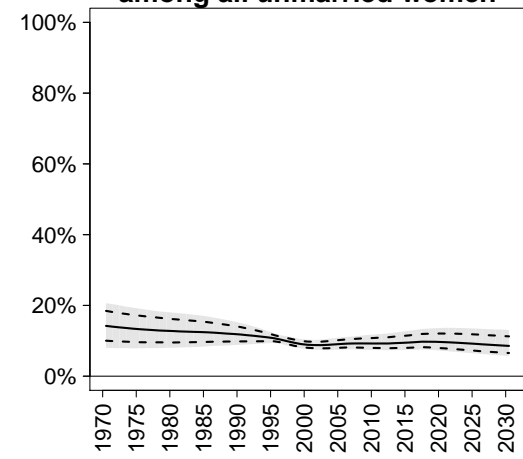

**Total demand**

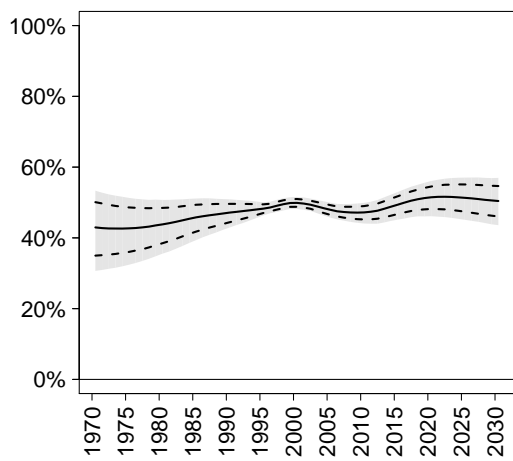

**Demand satisfied (any method)**

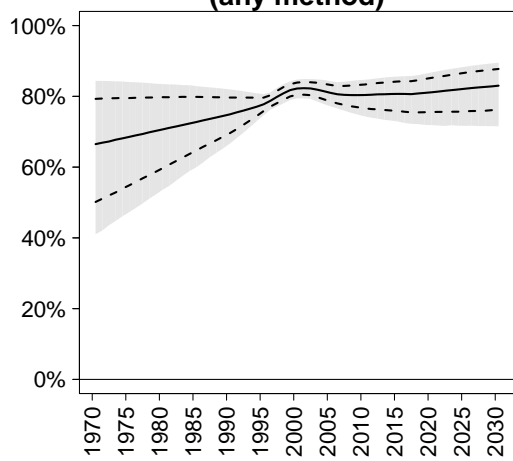

**Demand satisfied (modern methods)**

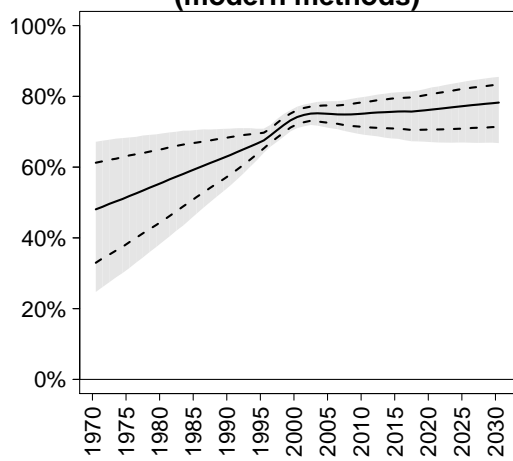

Eastern Asia --- All women

**CP (any)**

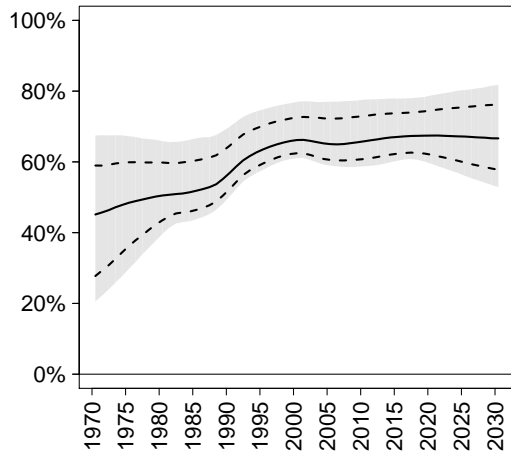

**CP (modern)**

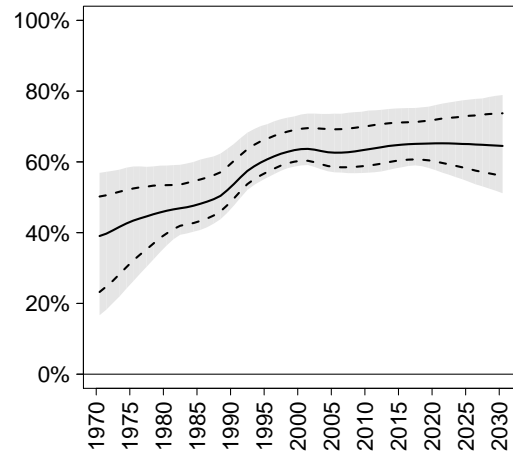

**CP (traditional)**

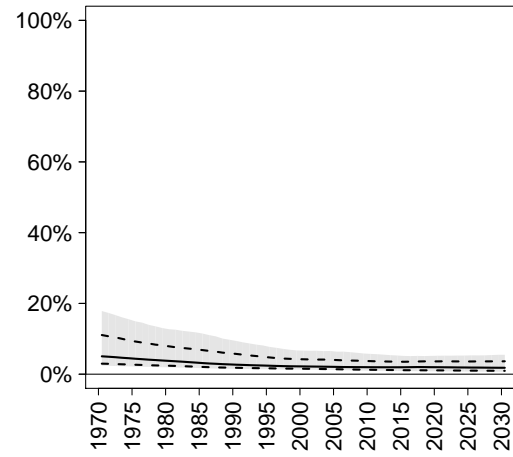

**Unmet need among all unmarried women**

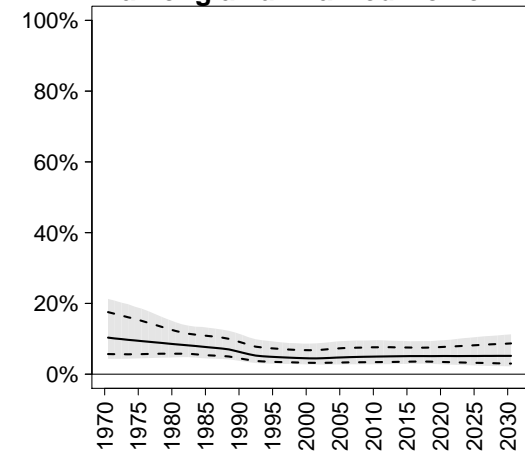

**Total demand**

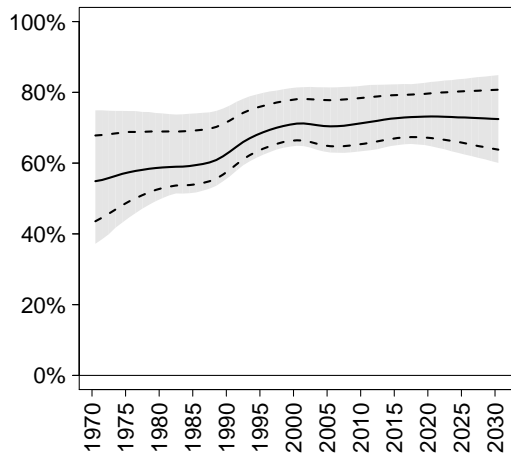

**Demand satisfied (any method)**

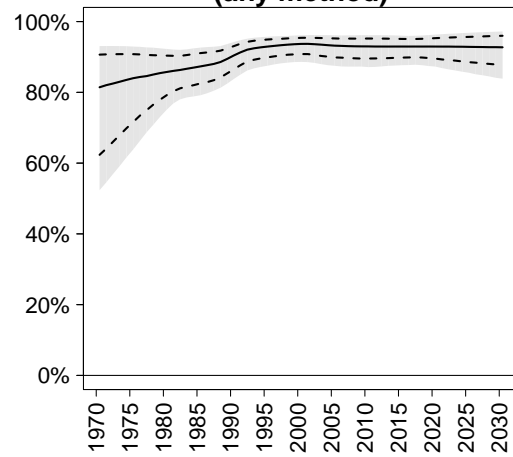

**Demand satisfied (modern methods)**

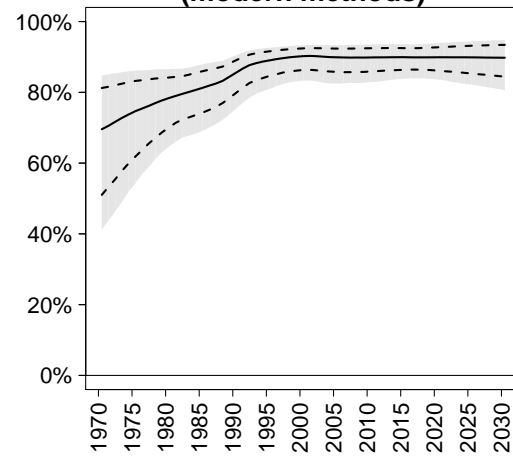

South-eastern Asia --- All women

**CP (any)**

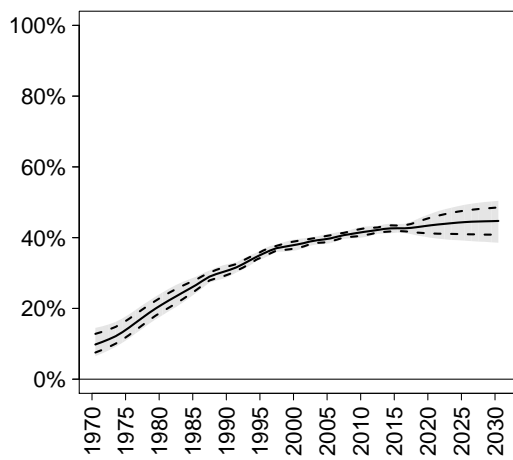

**CP (modern)**

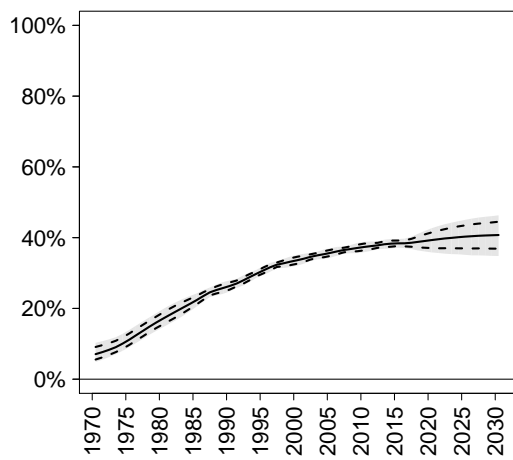

**CP (traditional)**

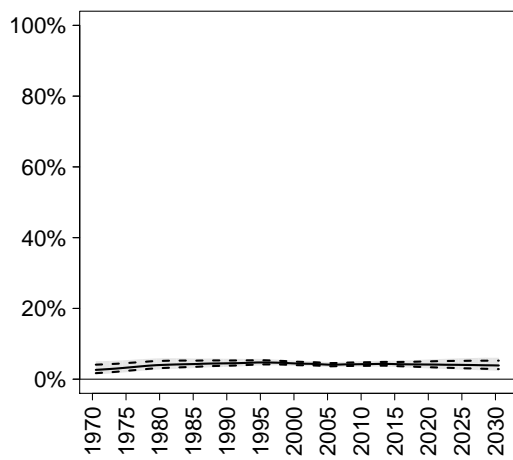

**Unmet need among all unmarried women**

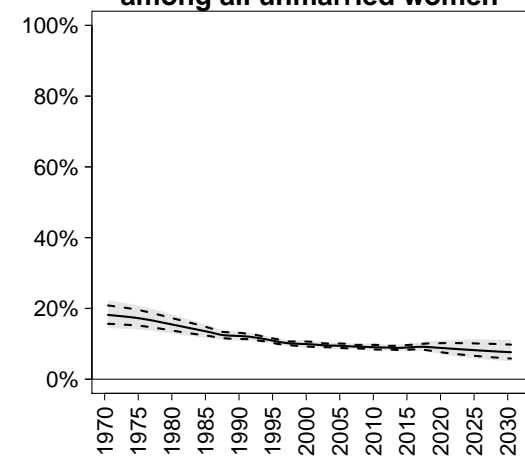

**Total demand**

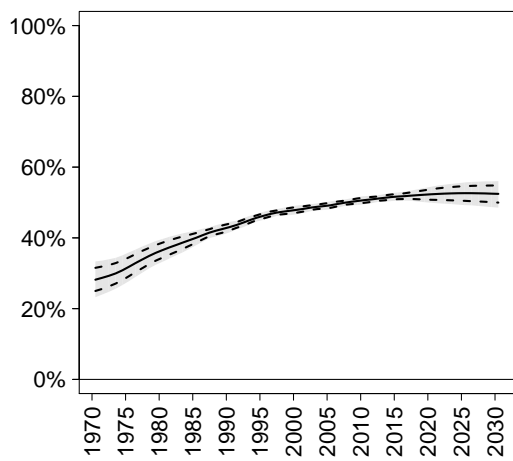

**Demand satisfied (any method)**

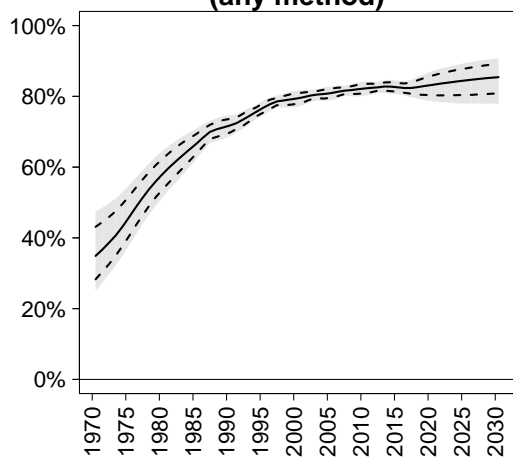

**Demand satisfied (modern methods)**

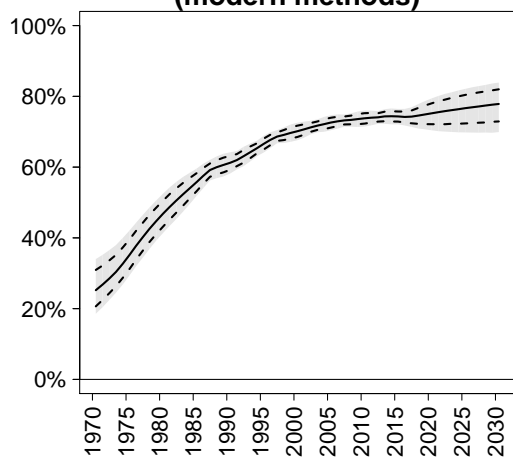

Southern Asia --- All women

**CP (any)**

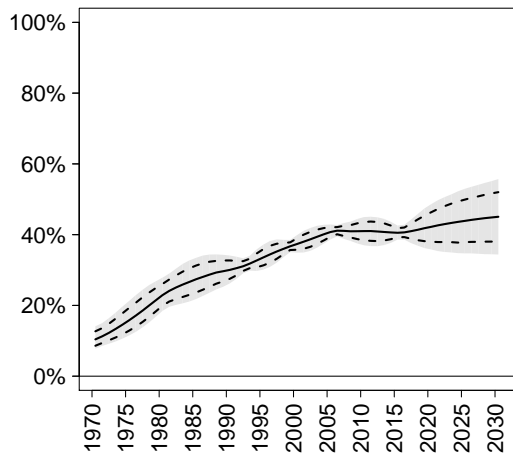

**CP (modern)**

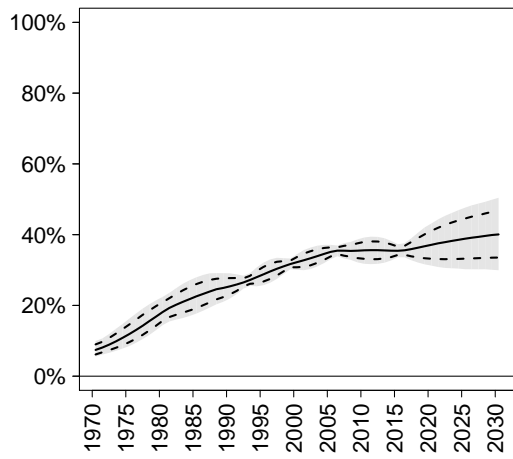

**CP (traditional)**

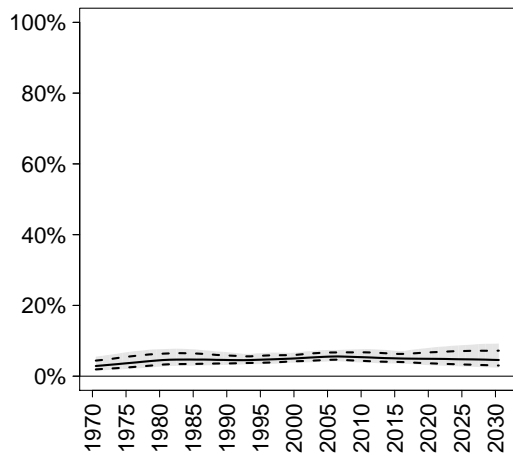

**Unmet need among all unmarried women**

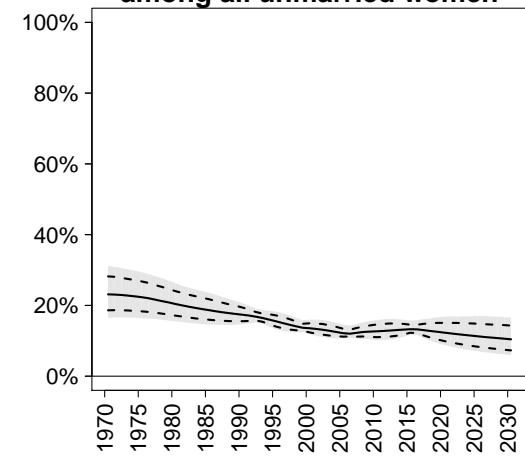

**Total demand**

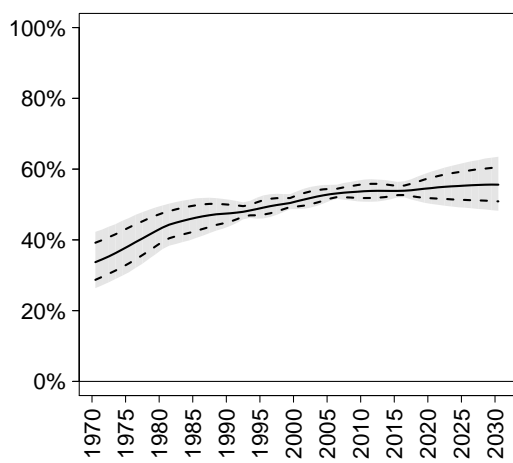

**Demand satisfied (any method)**

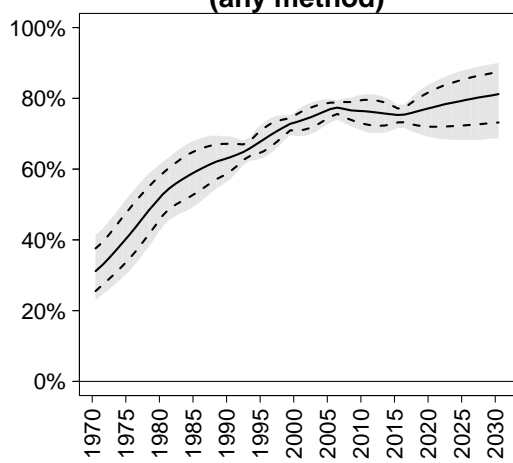

**Demand satisfied (modern methods)**

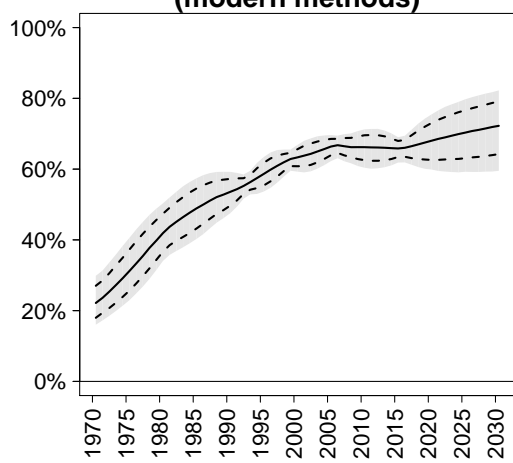

Western Asia --- All women

**CP (any)**

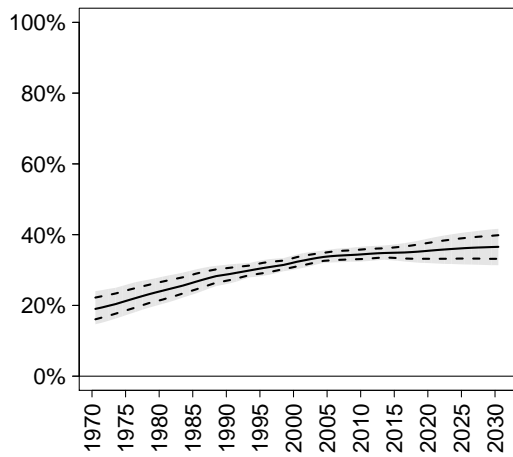

**CP (modern)**

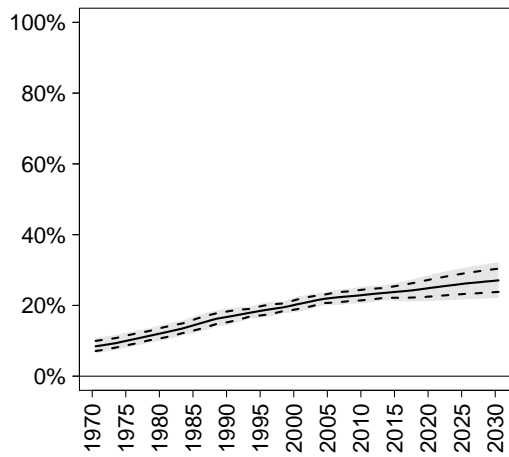

**CP (traditional)**

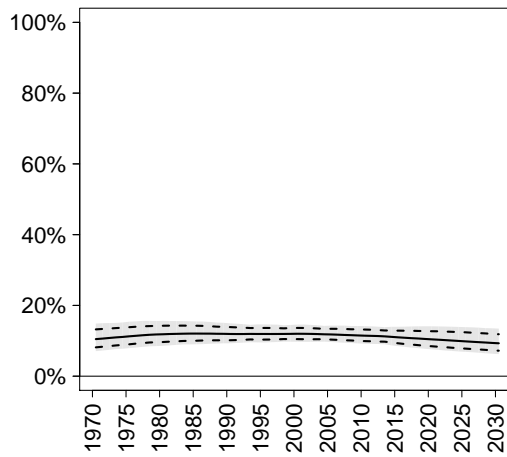

**Unmet need among all unmarried women**

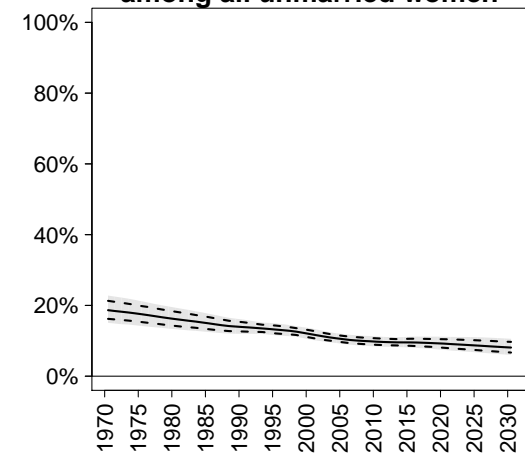

**Total demand**

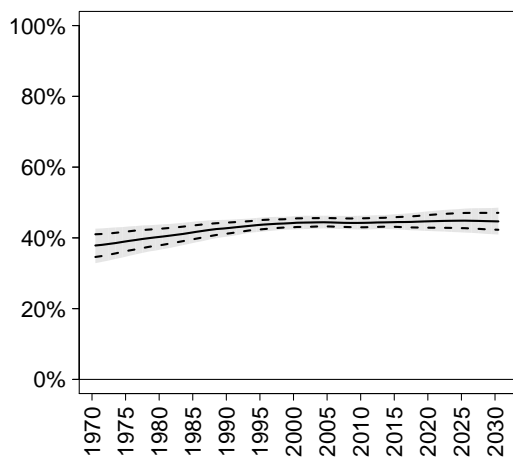

**Demand satisfied (any method)**

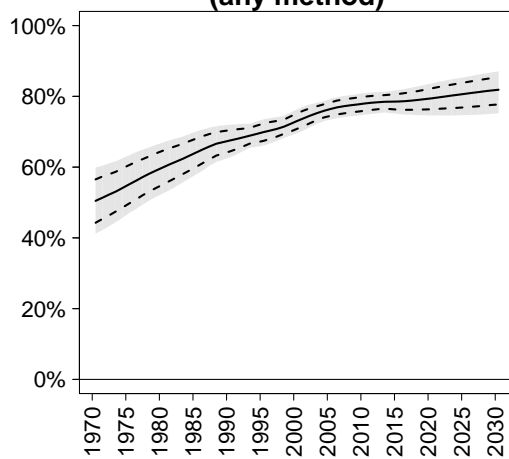

**Demand satisfied (modern methods)**

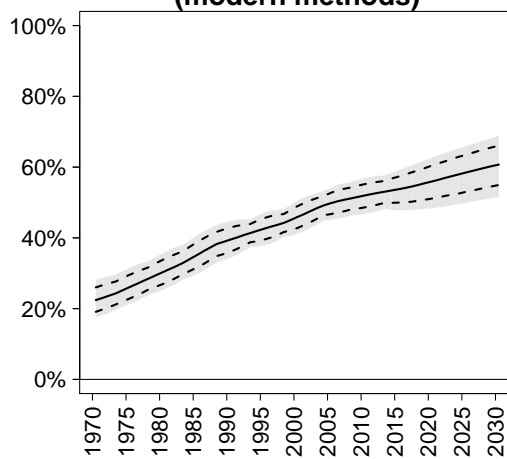

Europe --- All women

**CP (any)**

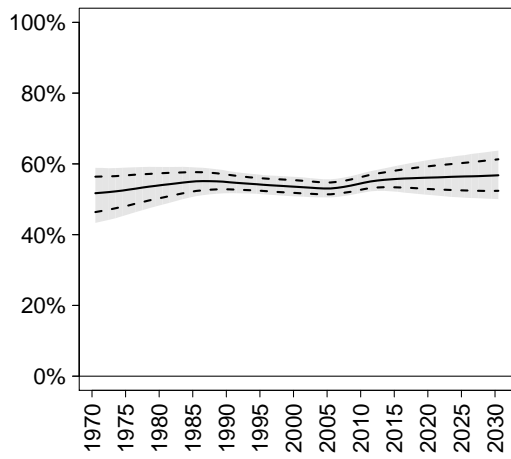

**CP (modern)**

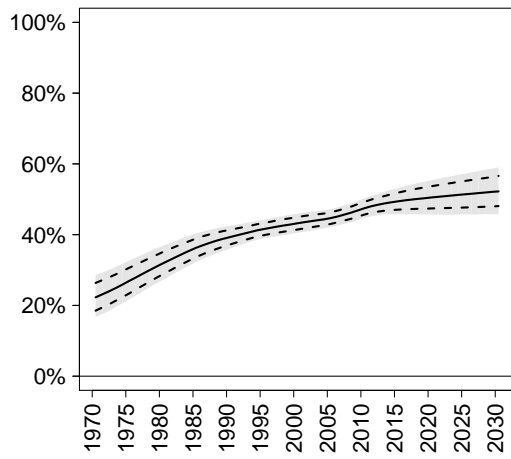

**CP (traditional)**

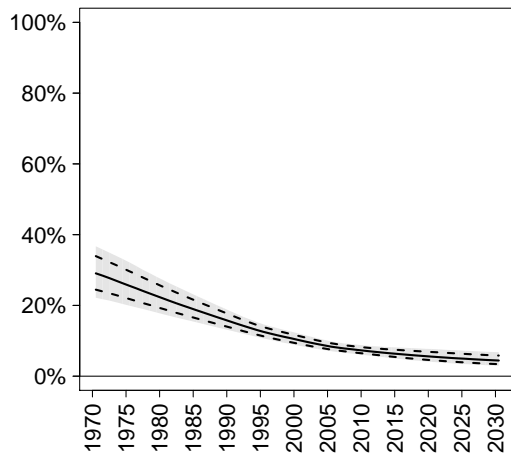

**Unmet need among all unmarried women**

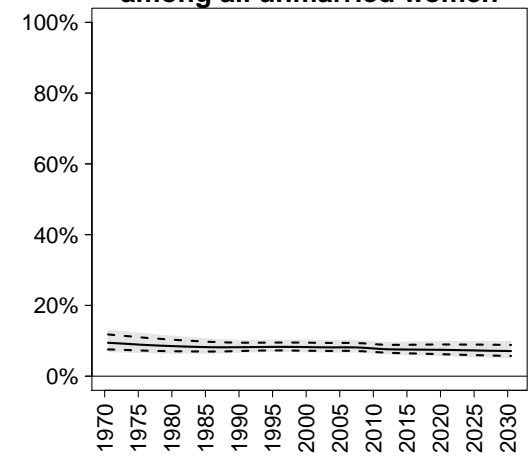

**Total demand**

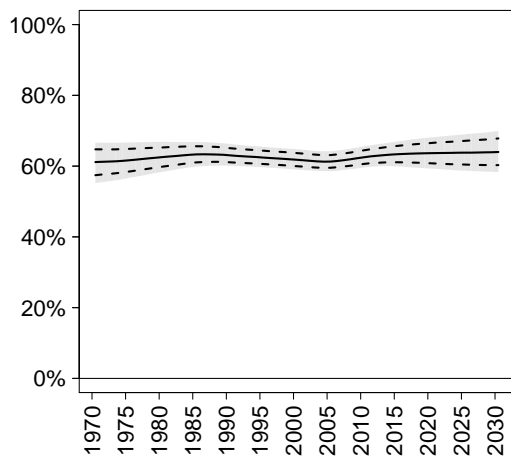

**Demand satisfied (any method)**

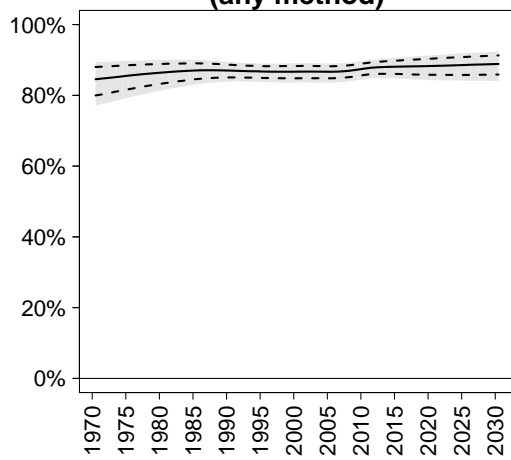

**Demand satisfied (modern methods)**

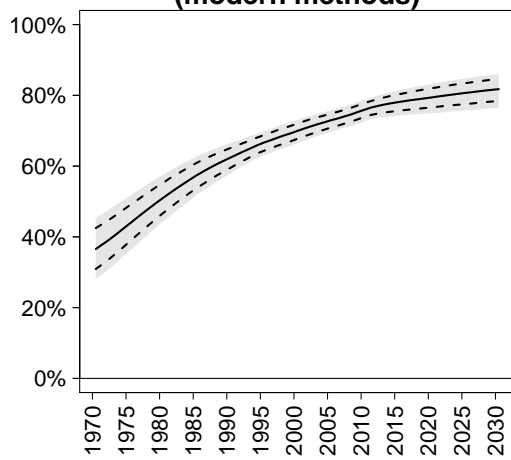

Eastern Europe --- All women

**CP (any)**

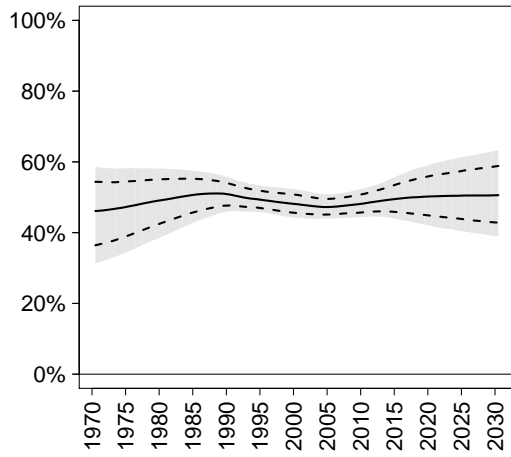

**CP (modern)**

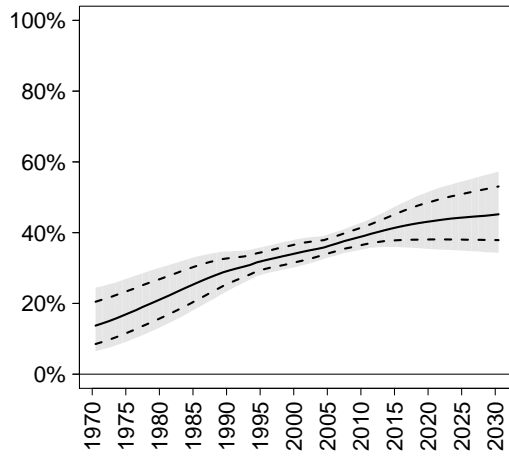

**CP (traditional)**

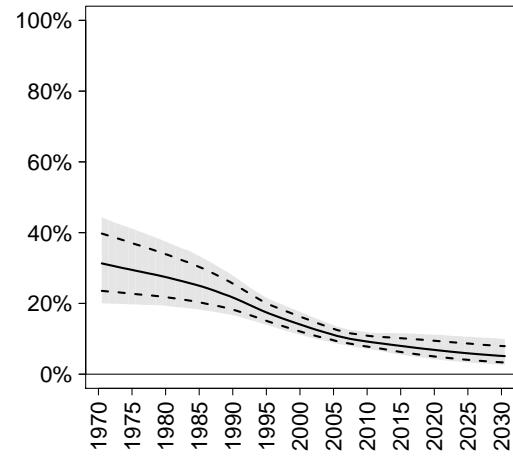

**Unmet need among all unmarried women**

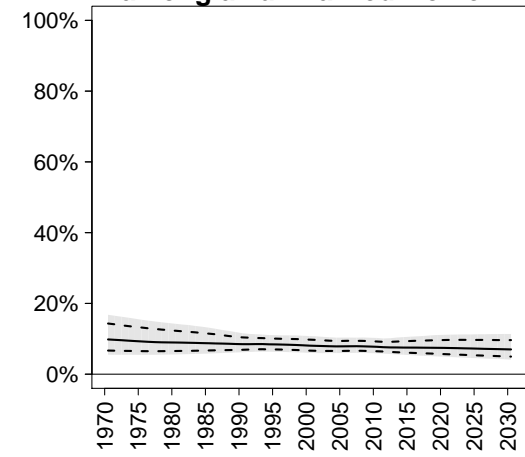

**Total demand**

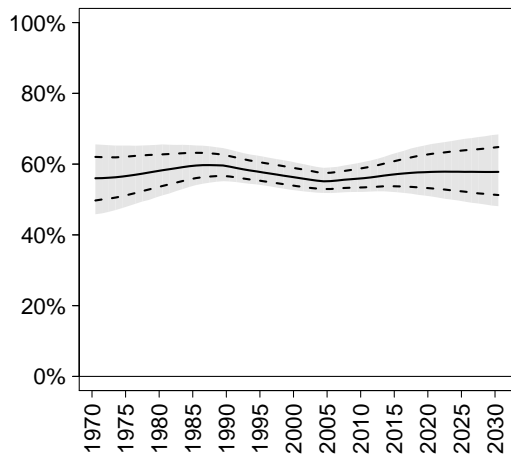

**Demand satisfied (any method)**

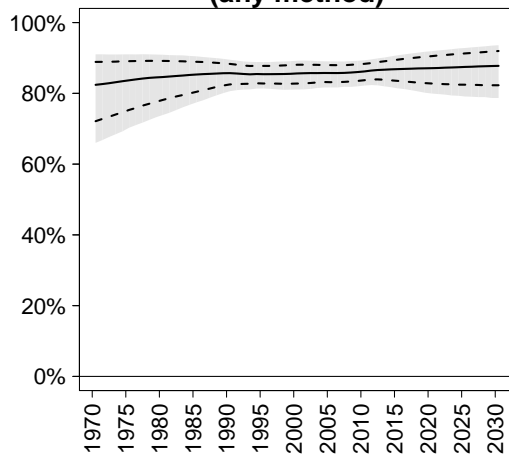

**Demand satisfied (modern methods)**

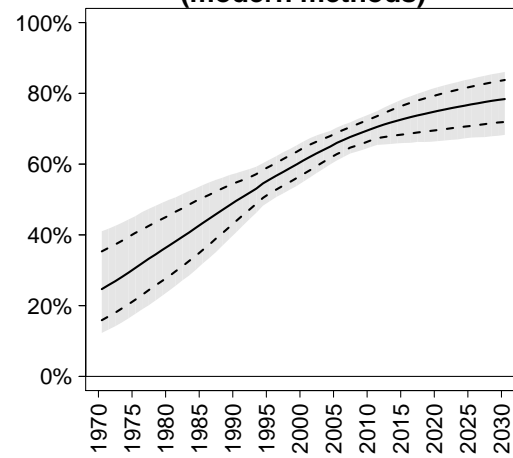

Northern Europe --- All women

**CP (any)**

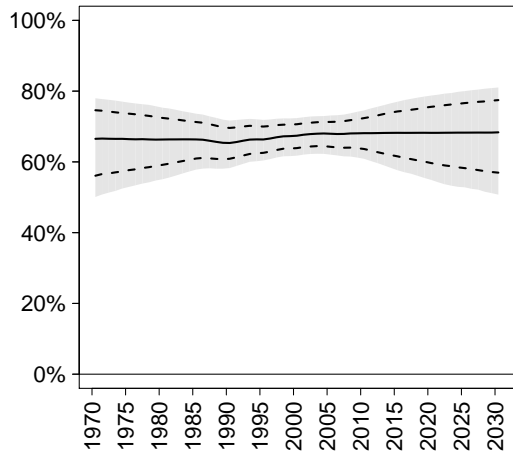

**CP (modern)**

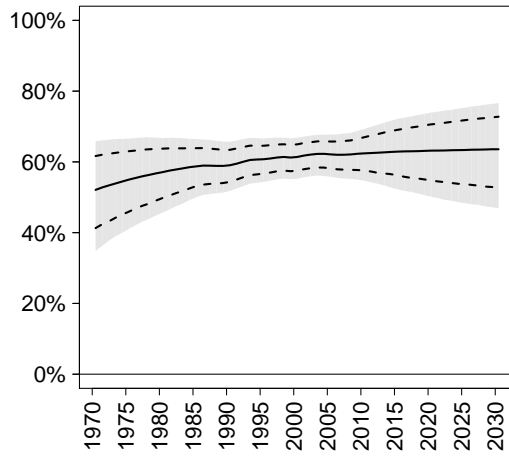

**CP (traditional)**

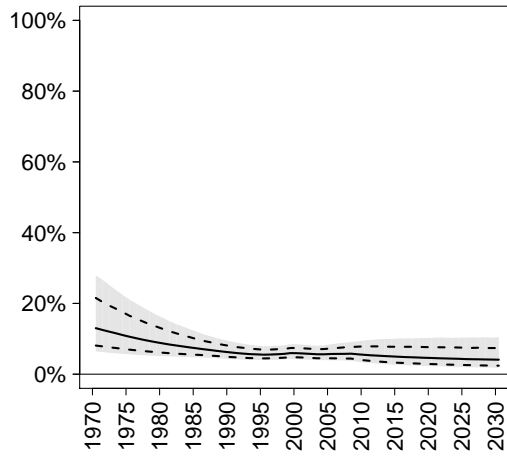

**Unmet need among all unmarried women**

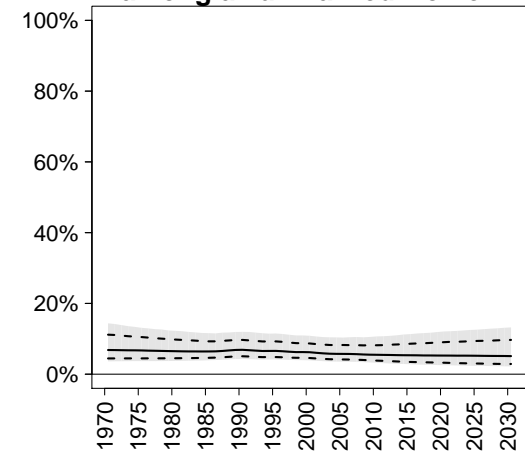

**Total demand**

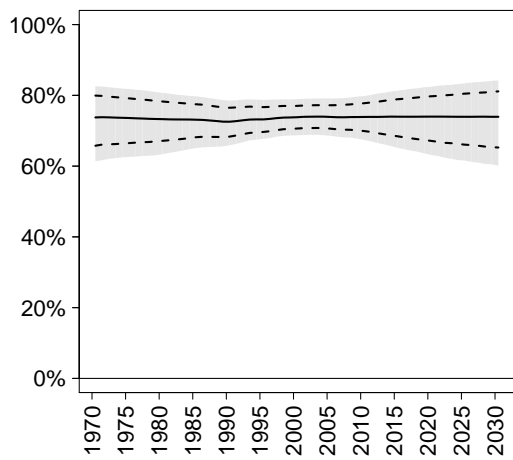



Southern Europe --- All women

**CP (any)**

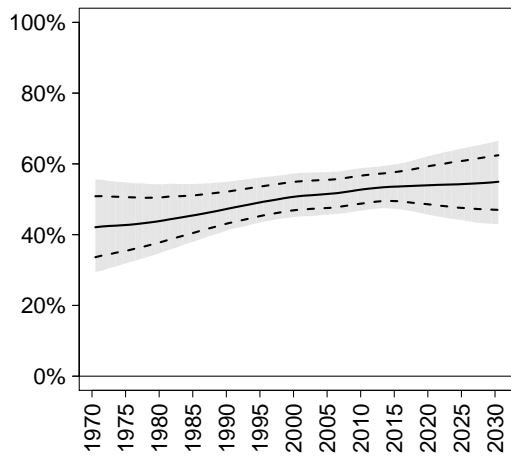

**CP (modern)**

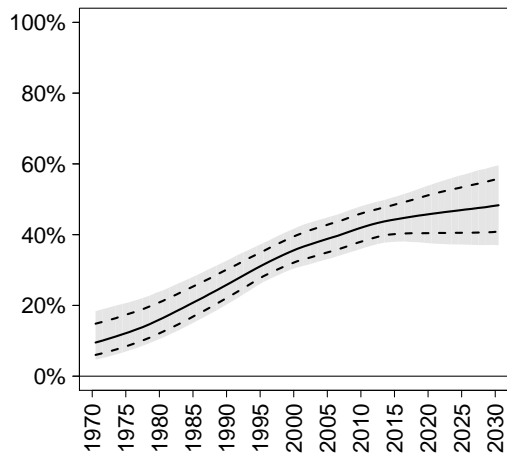

**CP (traditional)**

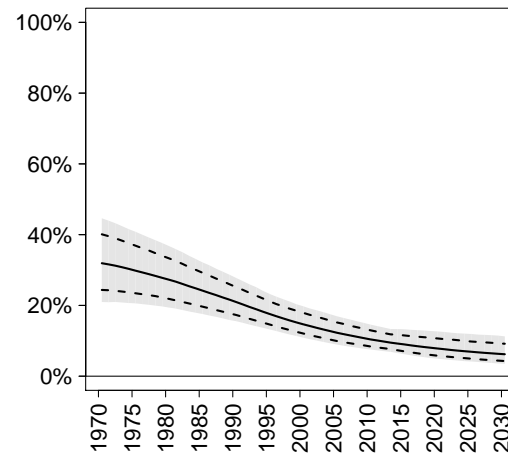

**Unmet need among all unmarried women**

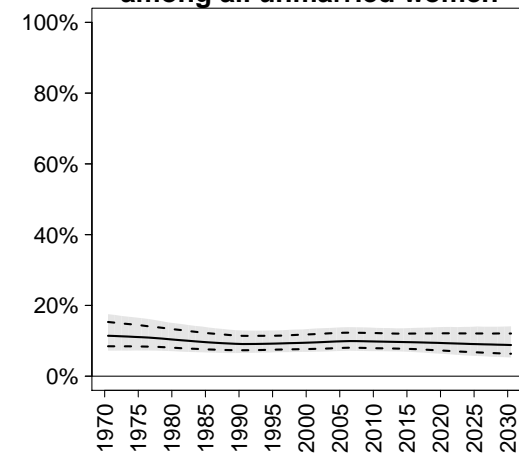

**Total demand**

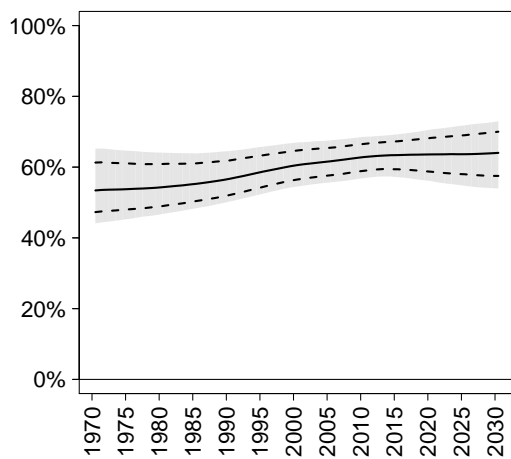

**Demand satisfied (any method)**

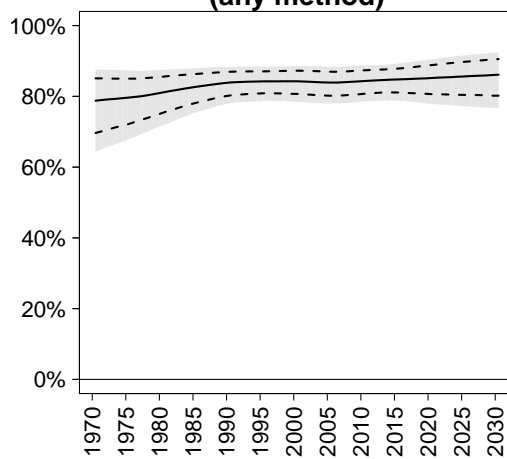

**Demand satisfied (modern methods)**

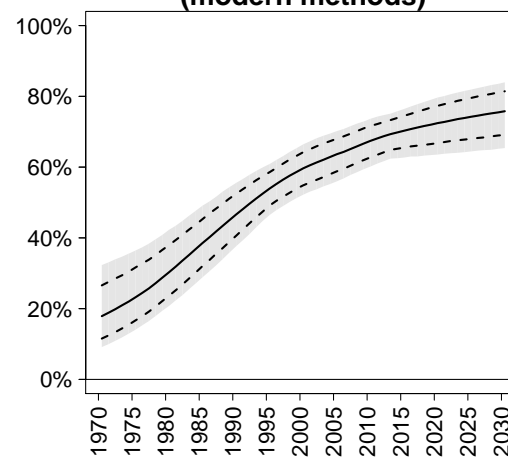

Western Europe --- All women

**CP (any)**

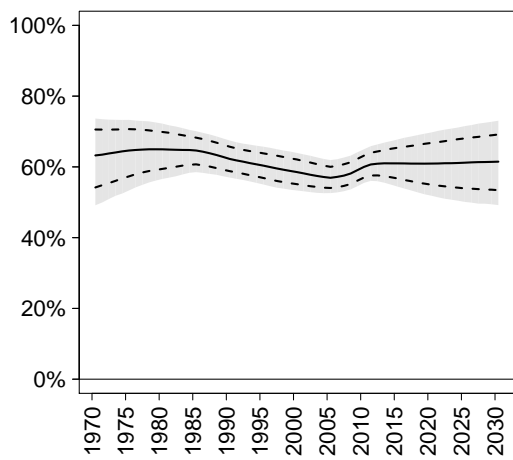

**CP (modern)**

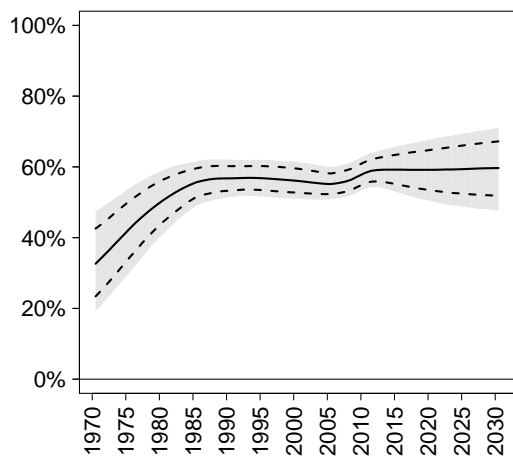

**CP (traditional)**

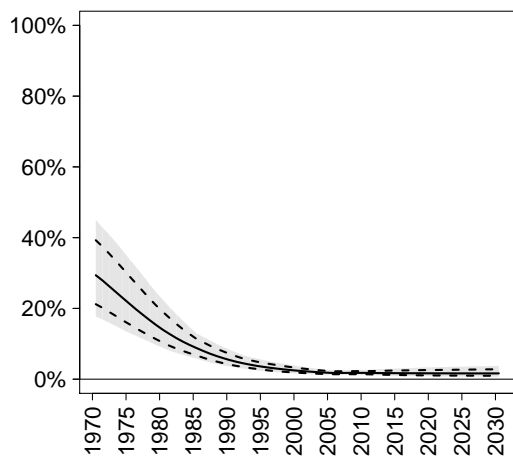

**Unmet need among all unmarried women**

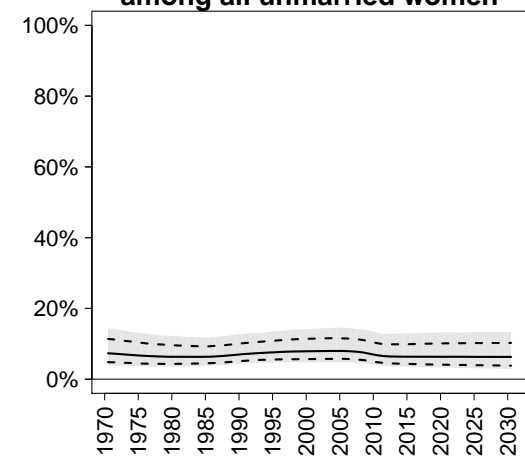

**Total demand**

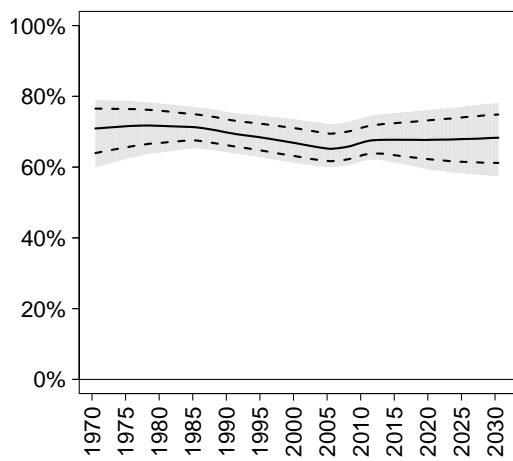

Latin America and the Caribbean --- All women

**CP (any)**

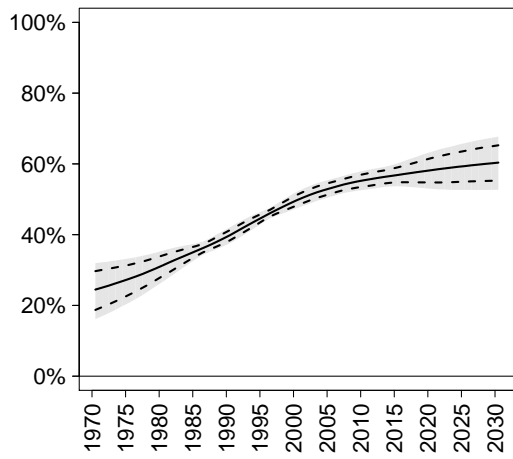

**CP (modern)**

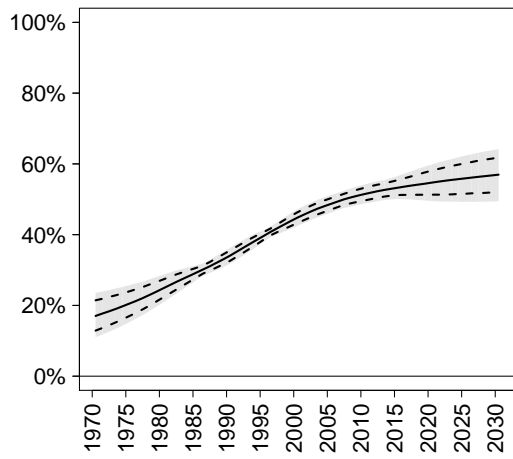

**CP (traditional)**

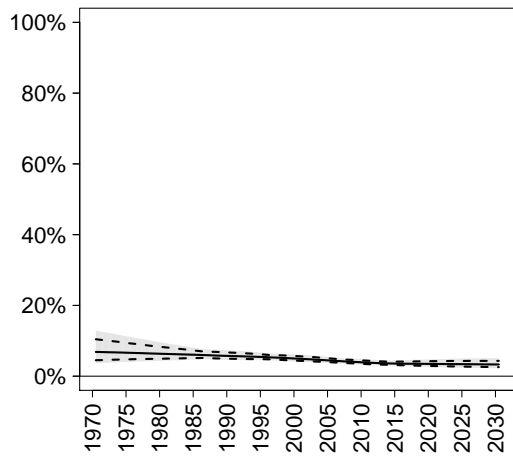

**Unmet need among all unmarried women**

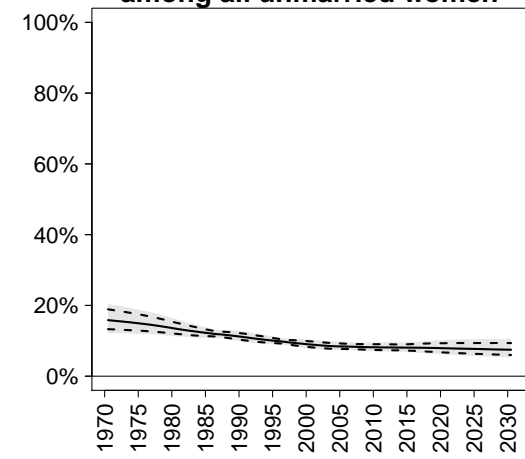

**Total demand**

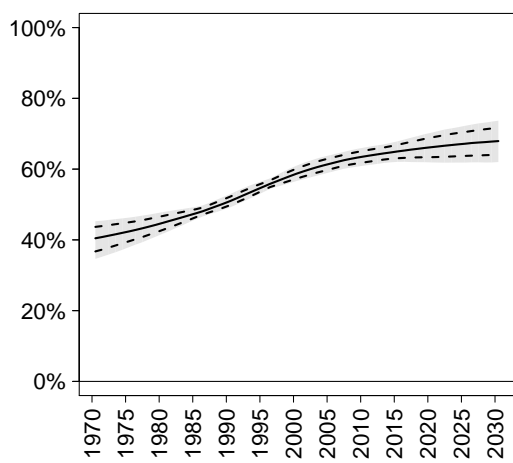

Caribbean --- All women

**CP (any)**

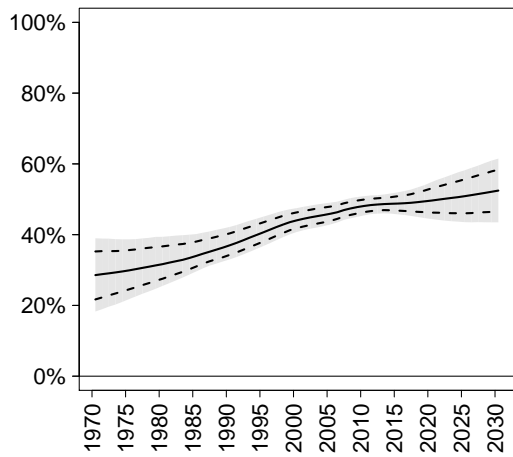

**CP (modern)**

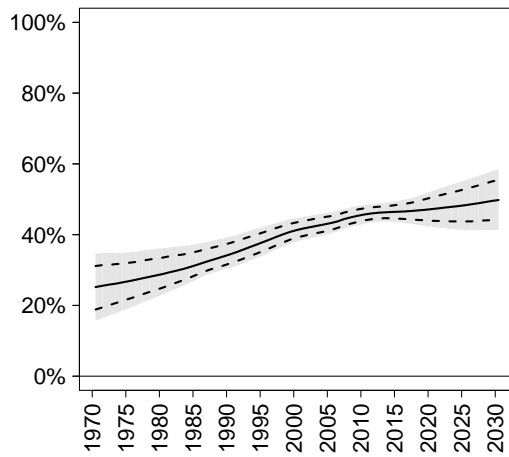

**CP (traditional)**

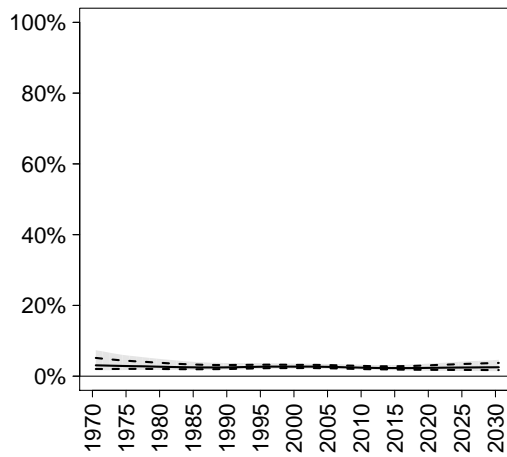

**Unmet need among all unmarried women**

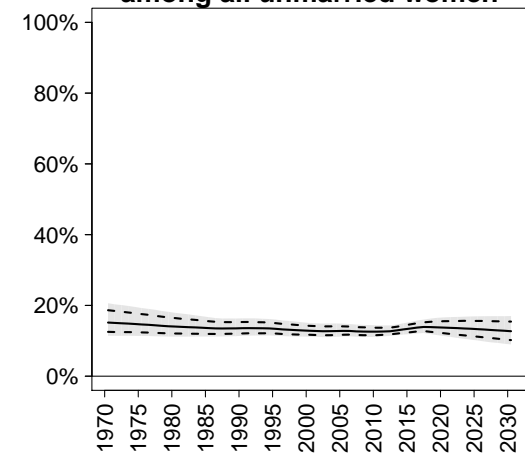

**Total demand**

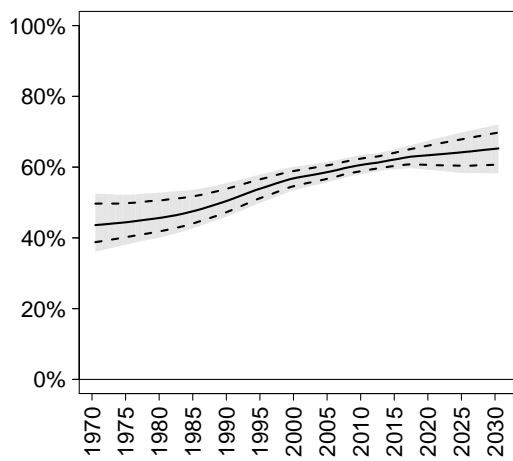

**Demand satisfied (any method)**

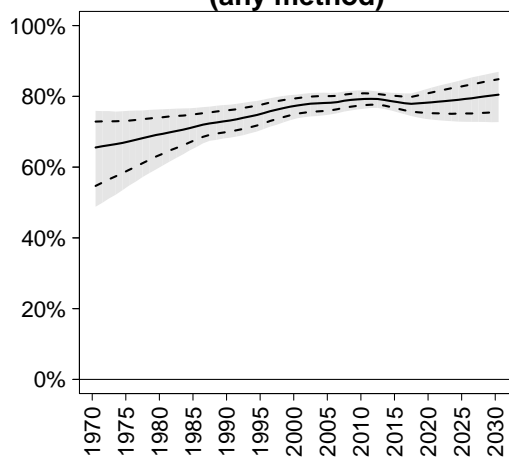

**Demand satisfied (modern methods)**

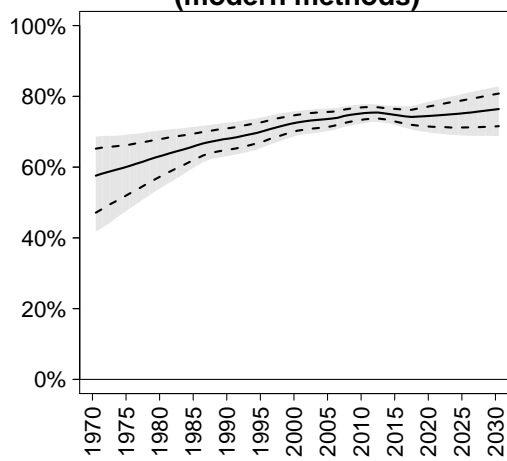

Central America --- All women

**CP (any)**

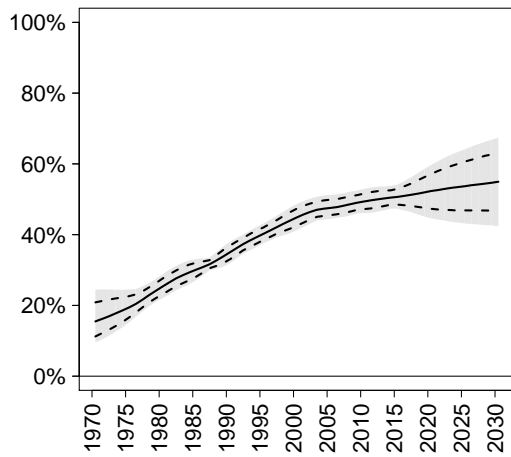

**CP (modern)**

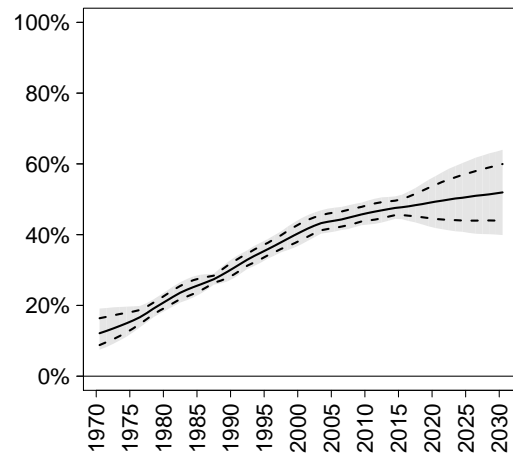

**CP (traditional)**

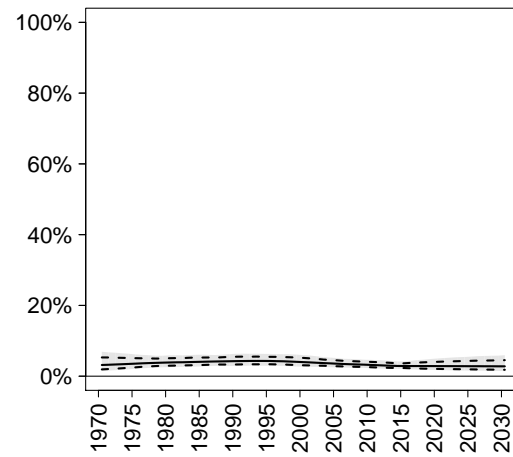

**Unmet need among all unmarried women**

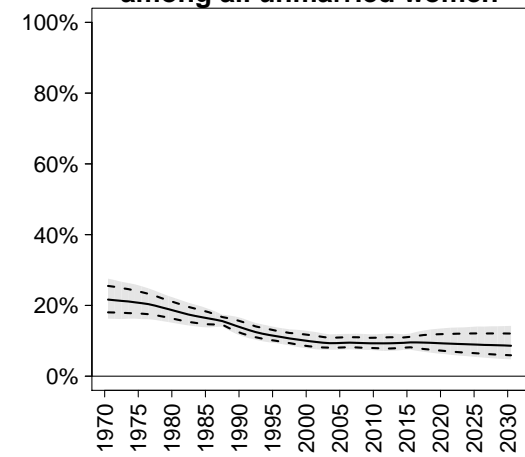

**Total demand**

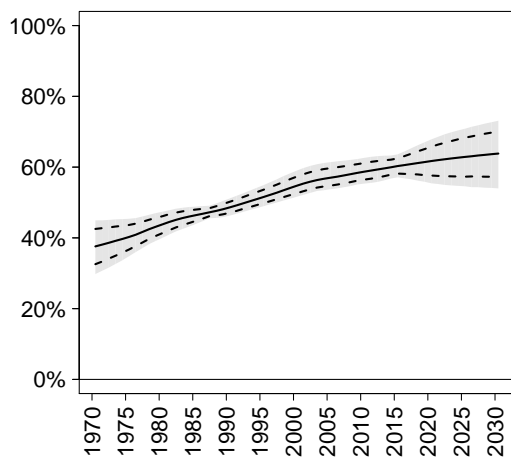

**Demand satisfied (any method)**

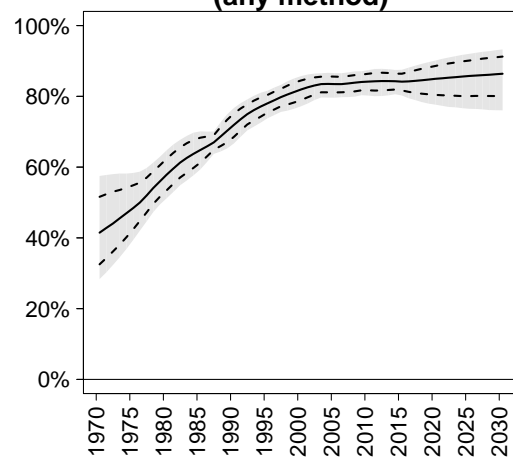

**Demand satisfied (modern methods)**

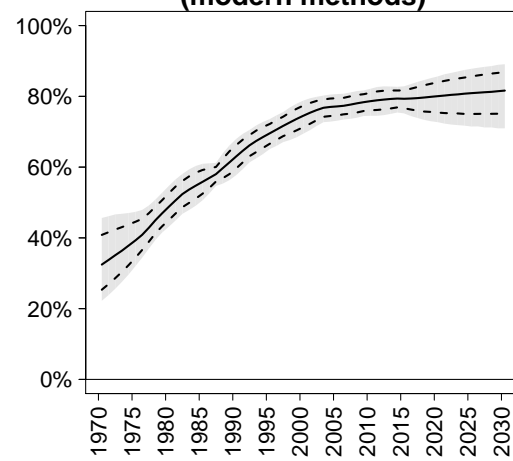

South America --- All women

**CP (any)**

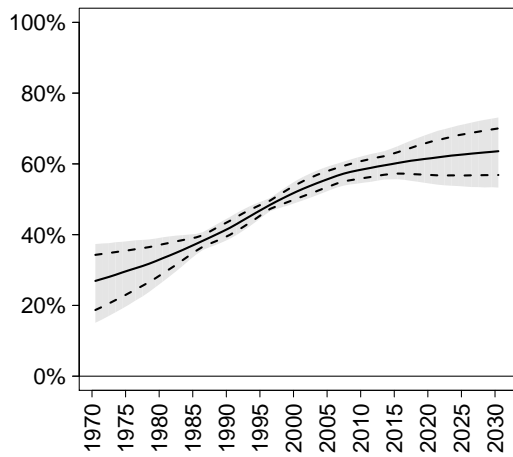

**CP (modern)**

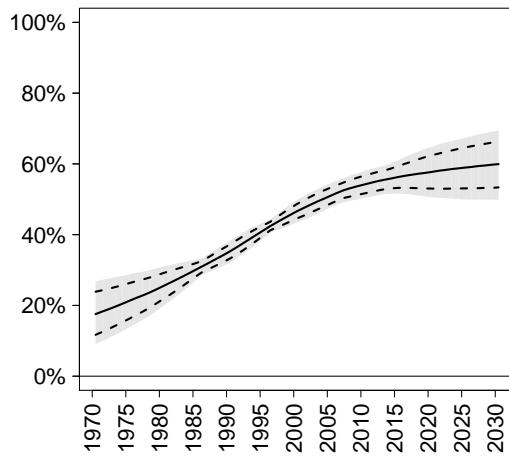

**CP (traditional)**

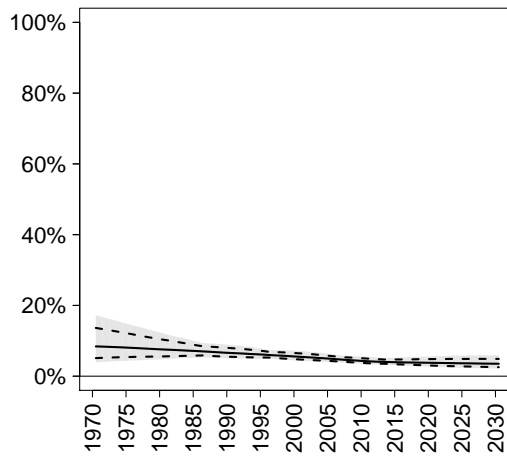

**Unmet need among all unmarried women**

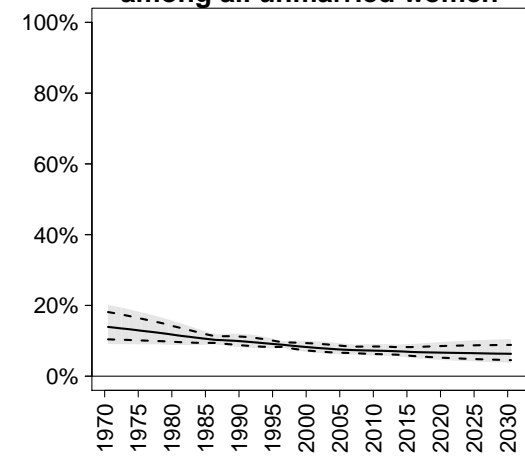

**Total demand**

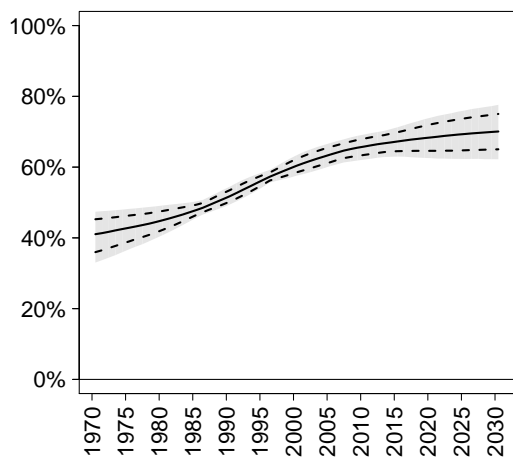

Northern America --- All women

**CP (any)**

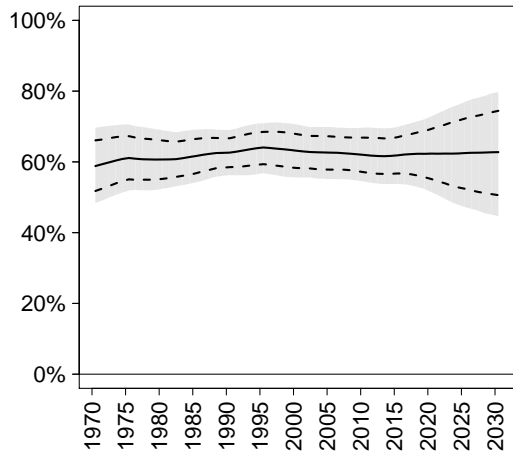

**CP (modern)**

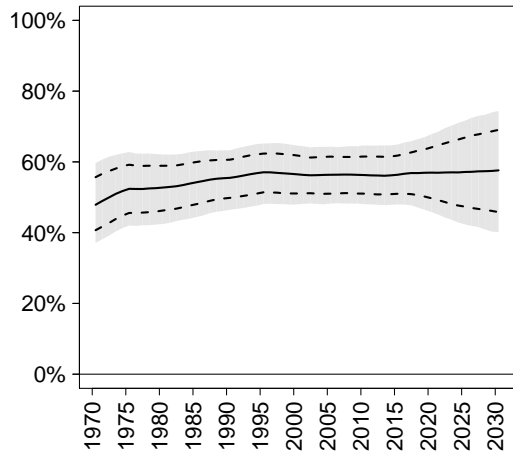

**CP (traditional)**

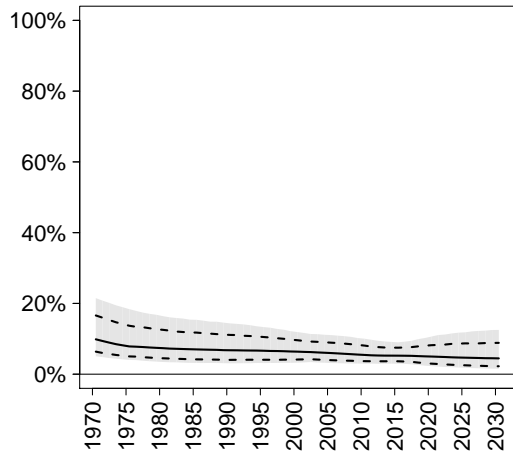

**Unmet need among all unmarried women**

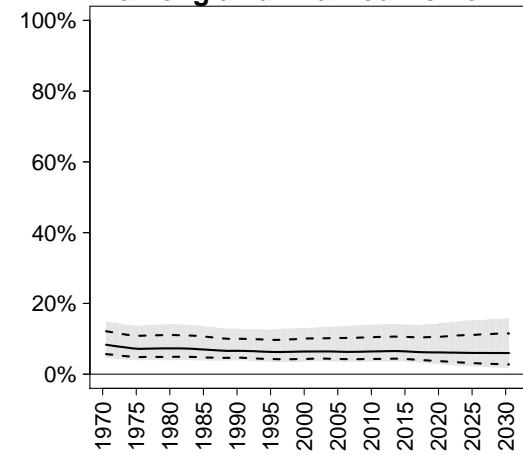

**Total demand**

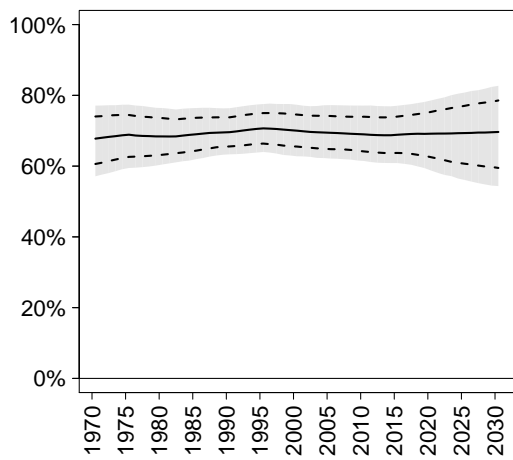

**Demand satisfied (any method)**

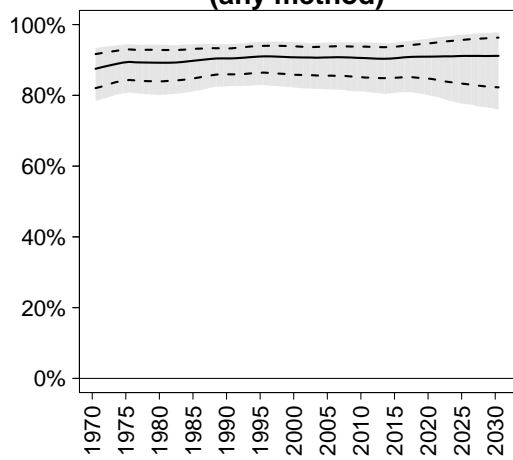

**Demand satisfied (modern methods)**

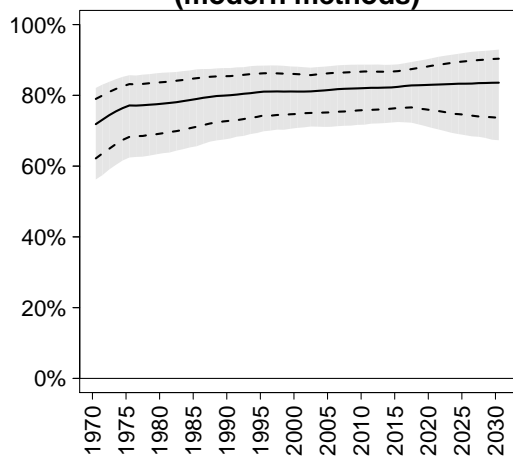

Oceania --- All women

**CP (any)**

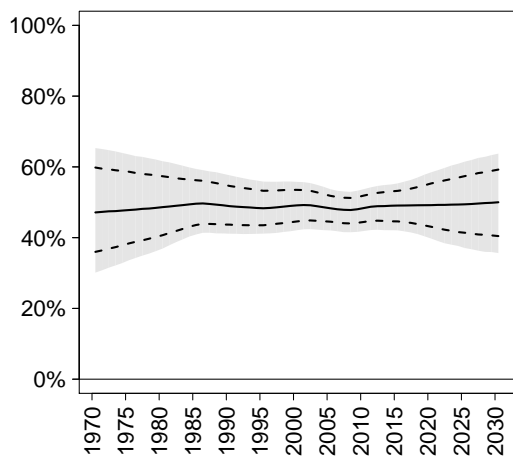

**CP (modern)**

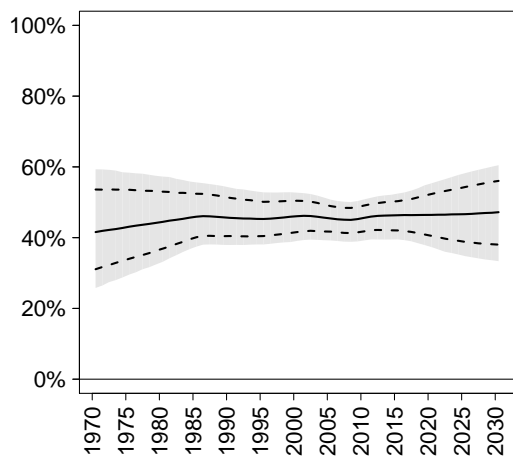

**CP (traditional)**

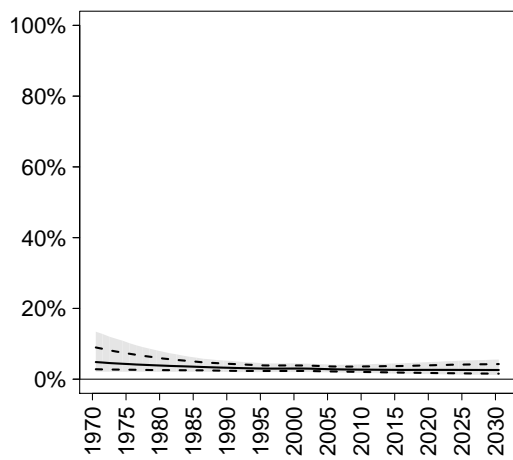

**Unmet need among all unmarried women**

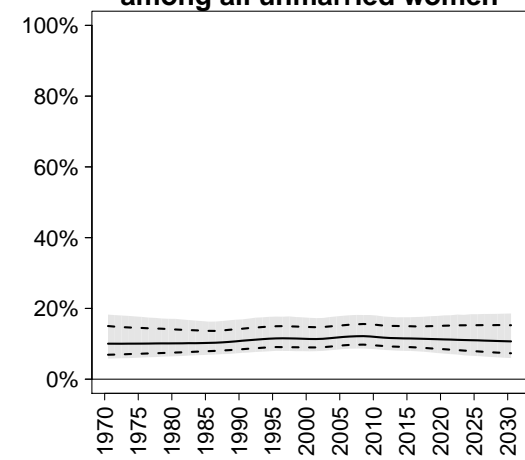

**Total demand**

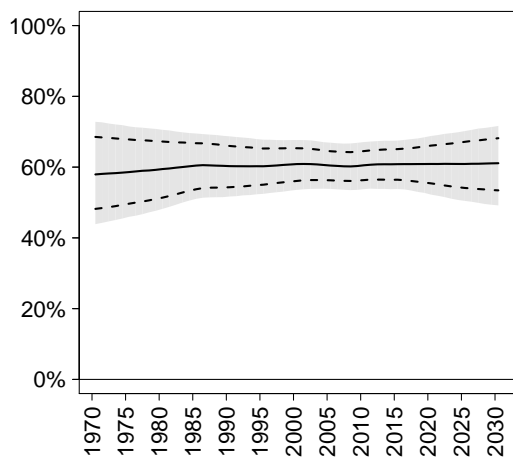

**Demand satisfied (any method)**

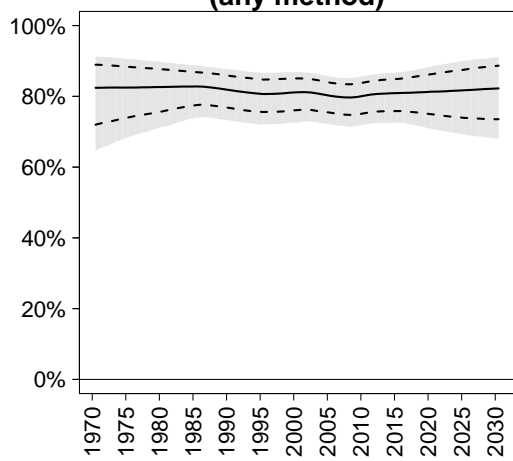

**Demand satisfied (modern methods)**

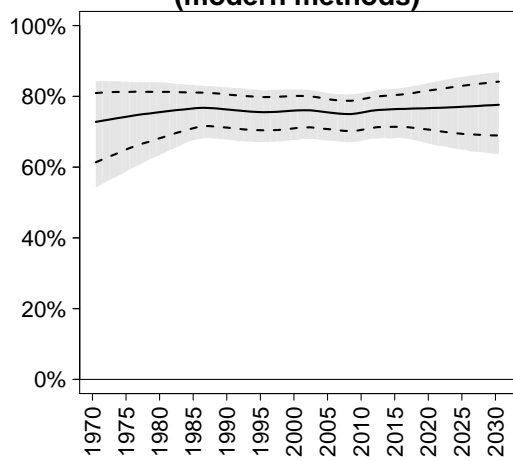



Australia and New Zealand --- All women

**CP (any)**

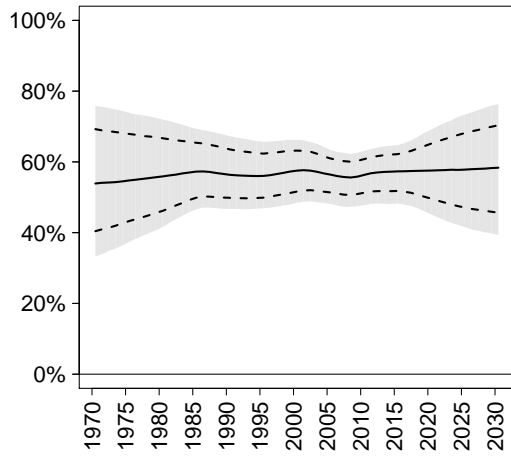

**CP (modern)**

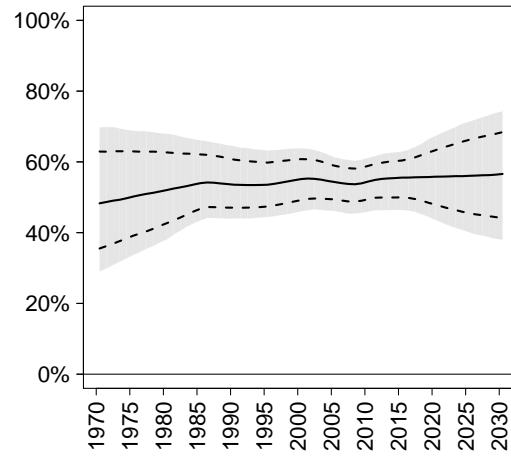

**CP (traditional)**

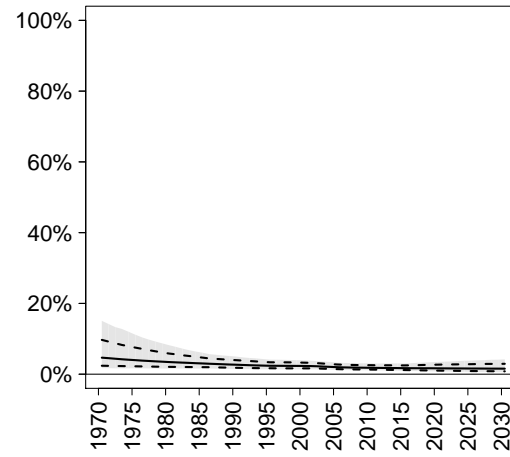

**Unmet need among all unmarried women**

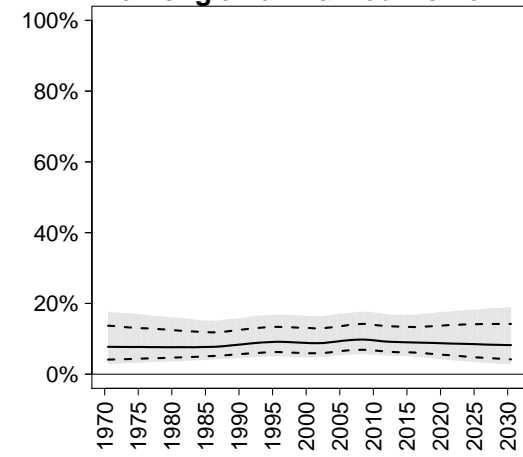

**Total demand**

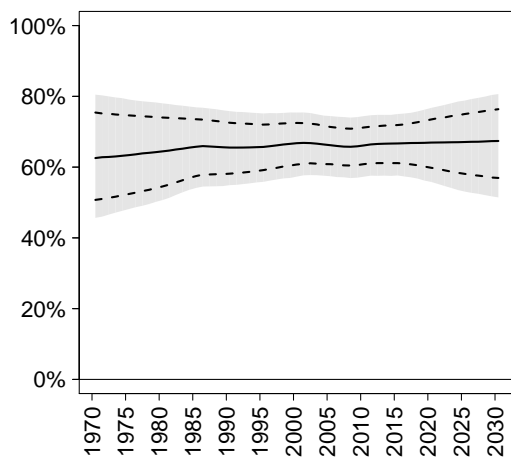

Melanesia --- All women

**CP (any)**

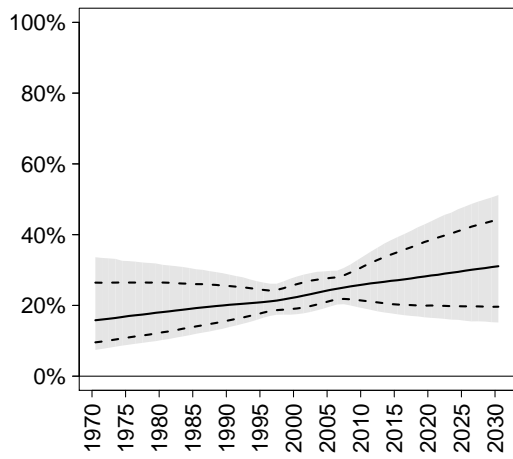

**CP (modern)**

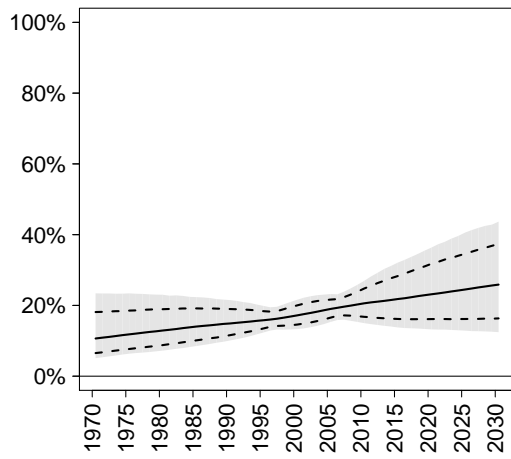

**CP (traditional)**

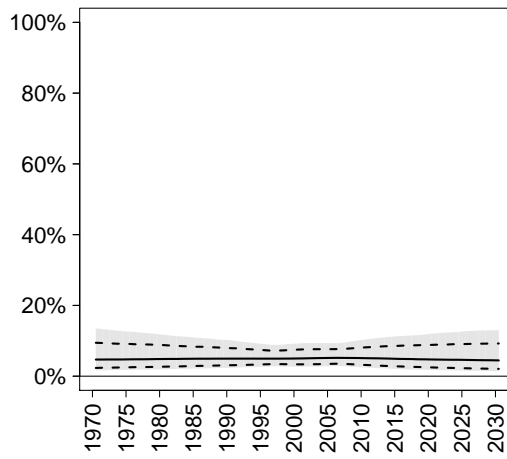

**Unmet need among all unmarried women**

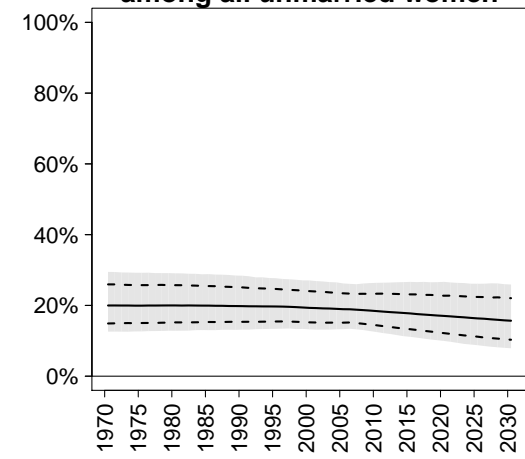

**Total demand**

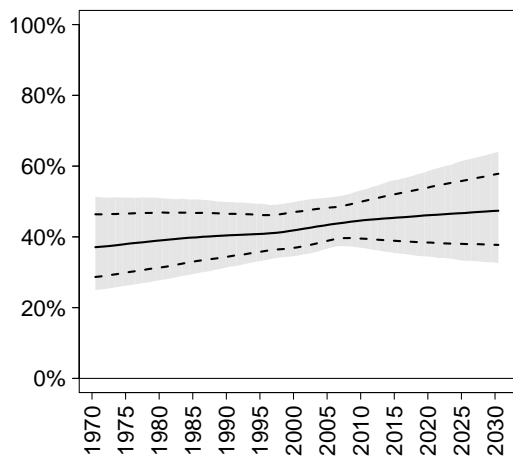

**Demand satisfied (any method)**

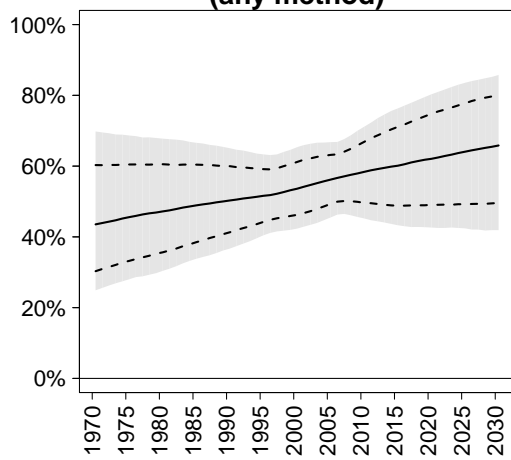

**Demand satisfied (modern methods)**

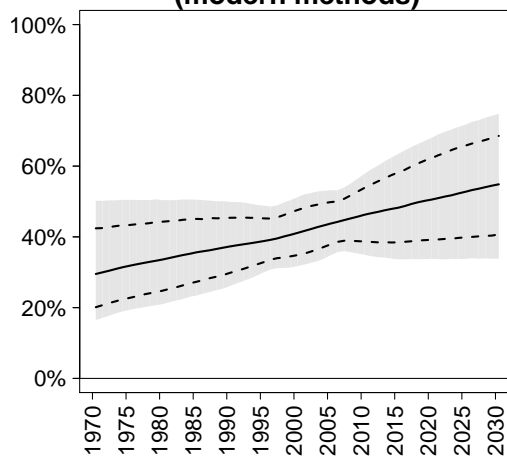

Micronesia --- All women

**CP (any)**

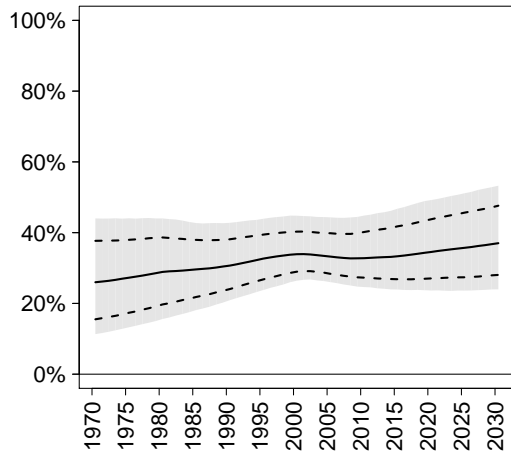

**CP (modern)**

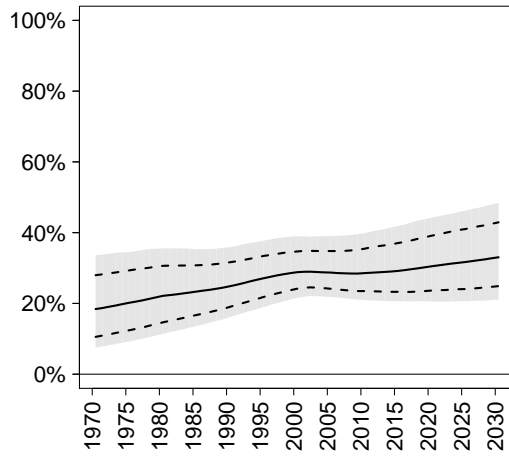

**CP (traditional)**

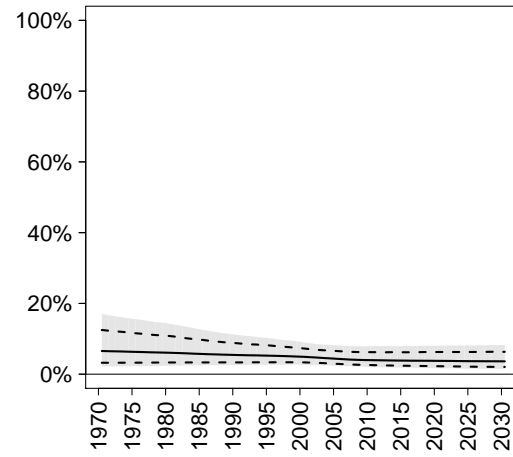

**Unmet need among all unmarried women**

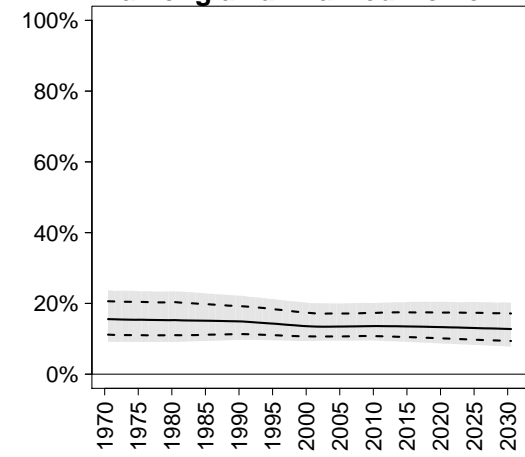

**Total demand**

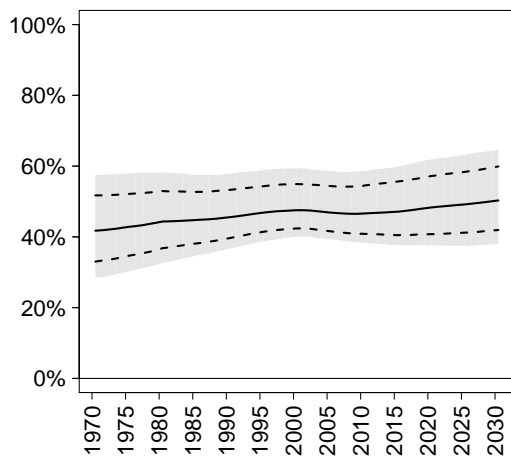

**Demand satisfied (any method)**

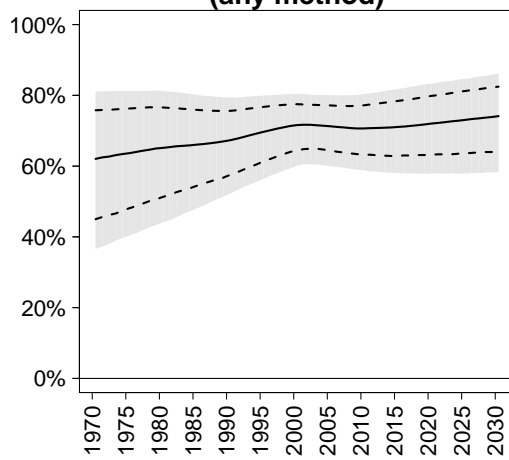

**Demand satisfied (modern methods)**

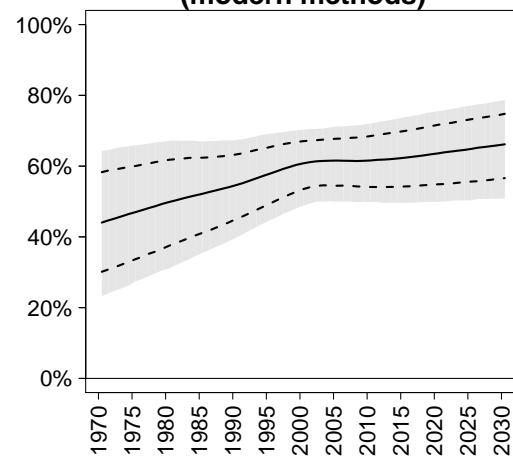

Polynesia --- All women

**CP (any)**

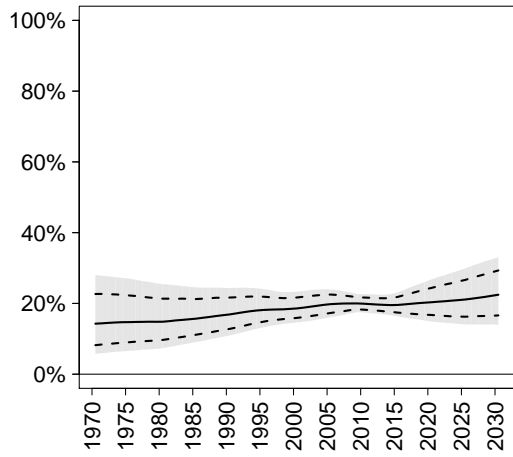

**CP (modern)**

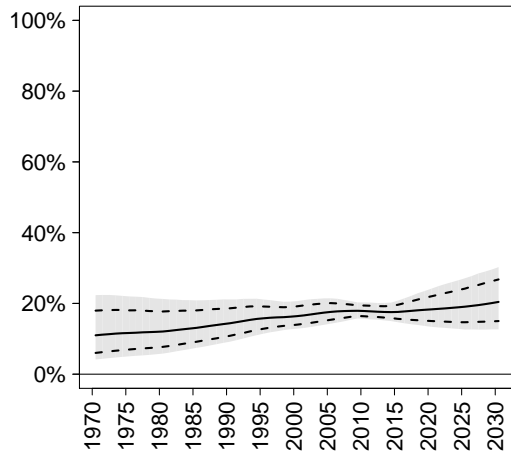

**CP (traditional)**

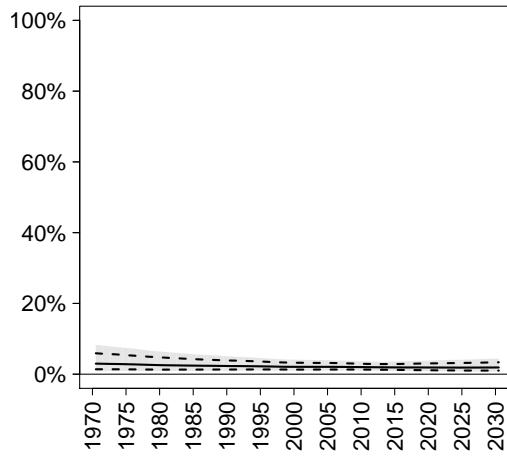

**Unmet need among all unmarried women**

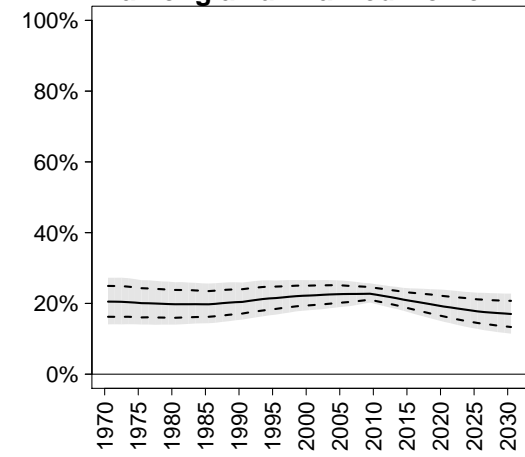

**Total demand**

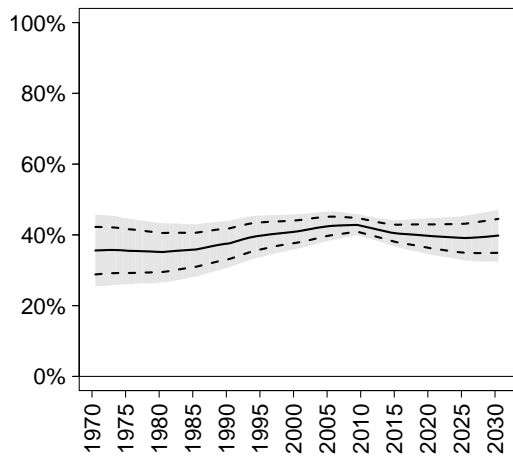

Supplement: pmed.1003026.s002.pdf [file pmed.1003026.s002.pdf]
